# Supplementary material for: The Abundant Phytocannabinoids in Rheumatoid Arthritis: Therapeutic Targets and Molecular Processes Identified Using Integrated Bioinformatics and Network Pharmacology
Source: MDPI journal article supplement (doi:10.3390/life13030700), 2023-03-05
Supplement: s1 [file s1]

## **Supplementary Material**

### **The abundant phytocannabinoids in rheumatoid arthritis: Therapeutic targets and molecular processes identified using the integrated bioinformatics and network pharmacology**

Arijit Nandi<sup>1</sup>, Anwesha Das<sup>2</sup>, Yadu Nandan Dey<sup>1\*</sup>, Kuldeep K. Roy<sup>3\*</sup>

<sup>1</sup>Dr. B.C. Roy College of Pharmacy and Allied Health Sciences, Durgapur-713206, West Bengal, India

<sup>2</sup>Department of Medicinal Chemistry, National Institute of Pharmaceutical Education and Research, Ahmedabad, Palaj, Gandhinagar 382355, Gujarat, India

<sup>3</sup>Department of Pharmaceutical Sciences, School of Health Sciences and Technology, UPES University, Dehradun- 248007, Uttarakhand, India

#### **Corresponding Authors**

\*Dr. Yadu Nandan Dey, Associate Professor, Dr. B.C. Roy College of Pharmacy and Allied Health Sciences, Durgapur-713206, West Bengal, India.

E-mail: yadunandandey@gmail.com; Phone: +91-7566232359

\*Dr. Kuldeep K. Roy, Associate professor, Department of Pharmaceutical Sciences, School of Health Sciences and Technology, UPES University, Dehradun- 248007, Uttarakhand, India

E-mail: kuldeepkroy@gmail.com, kuldeep.roy@ddn.upes.ac.in

#### **Supplementary figures.**

**Figure S1.** Molecular docking results (3D representation of the best active ingredients) of key targets (PIK3CA, Akt1, MAPK9, PRKCD, BRAF, IGF1R, NOS3) and specific cannabinoids.

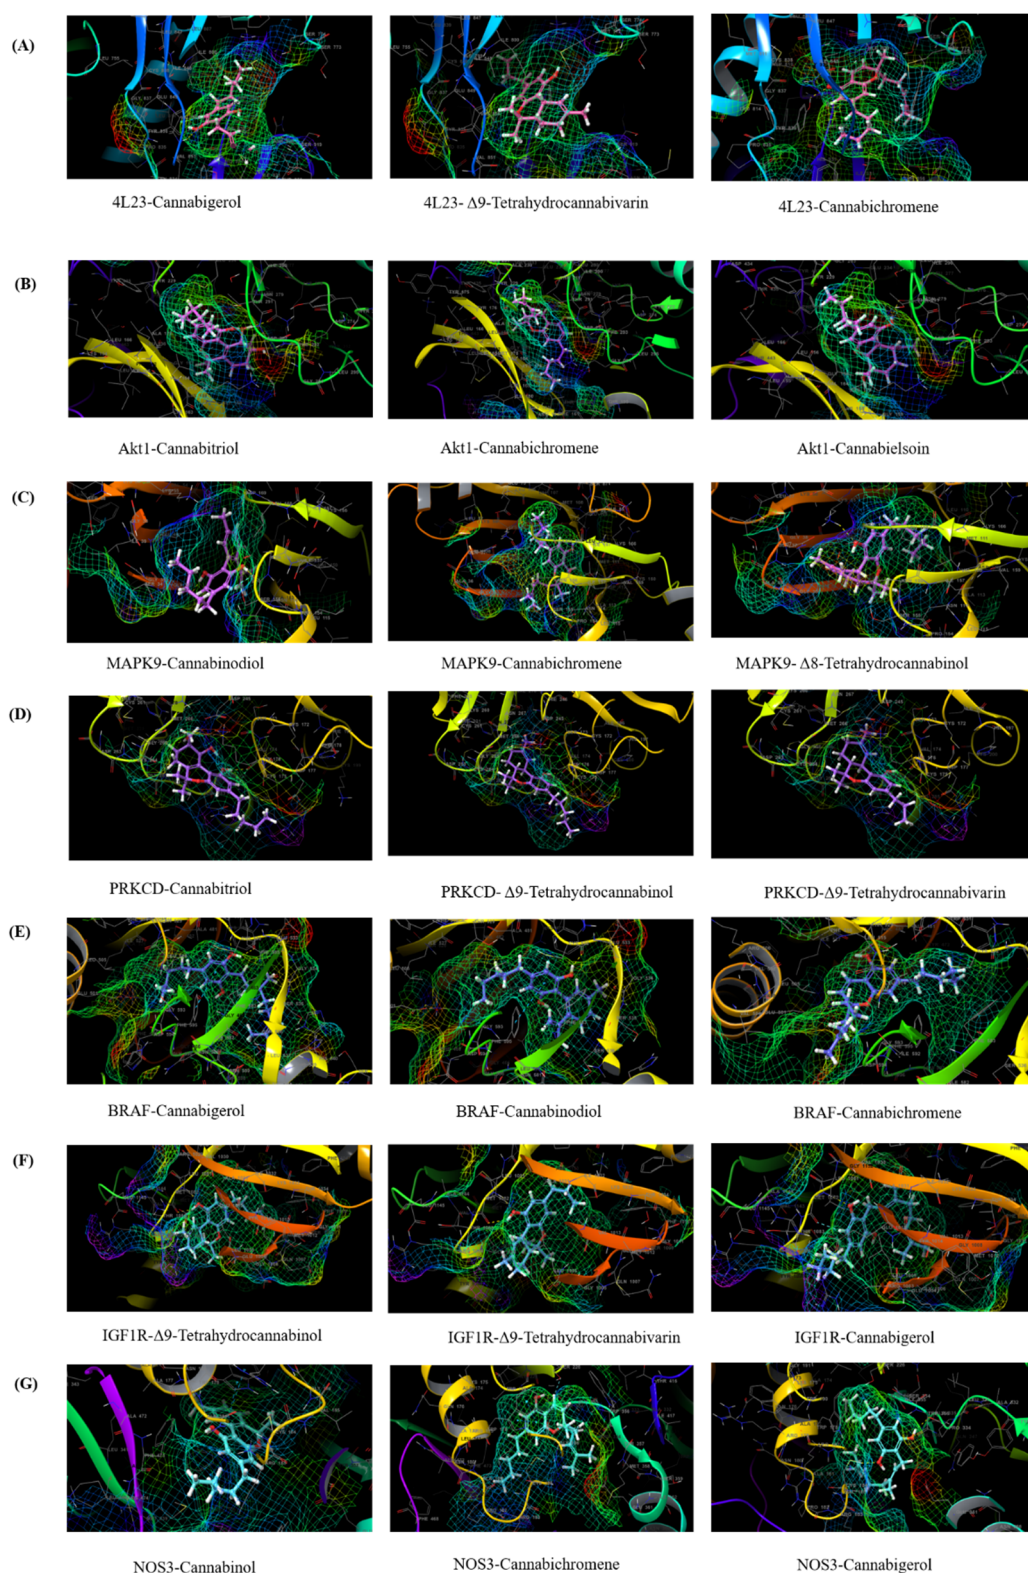

**Figure S2.** Molecular dynamics results of key target-ligands. RMSF and Protein-Ligands Contact Analysis of PIK3CA-cannabigerol (A1, B1, C1), Akt1-cannabitol (A2,B2,C2), MAPK9-cannadinodiol (A3,B3,C3), PRKCD- cannabitol (A4,B4,C4), BRAF- cannabigerol (A5,B5,C5), IGF1R- Δ9-tetrahydrocannabinol (A6,B6,C6), NOS3- cannabinol (A7,B7,C7) complexes.

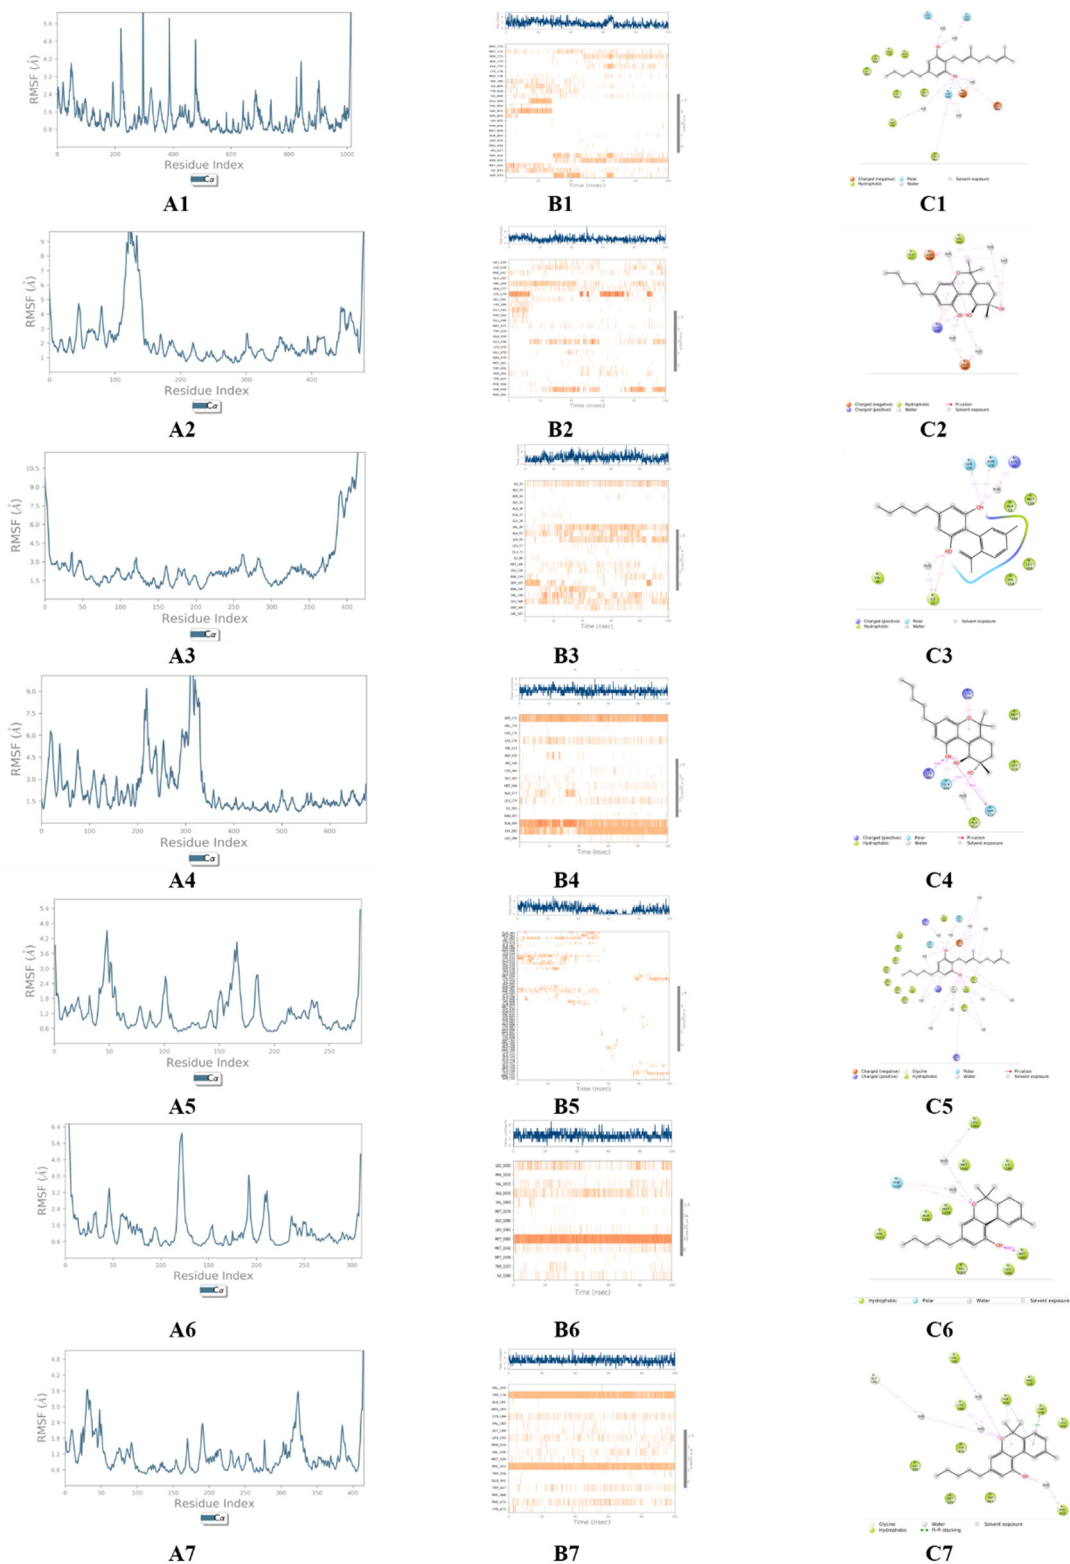

**Figure S3.** Induced Fit Docking results of key target-ligands. 2D representation of PIK3CA-cannabigerol, Akt1-cannabitriol, MAPK9-cannadinodiol, PRKCD-cannabitriol, BRAF- cannabigerol, IGF1R- Δ9-tetrahydrocannabinol, NOS3- cannabinol complexes.

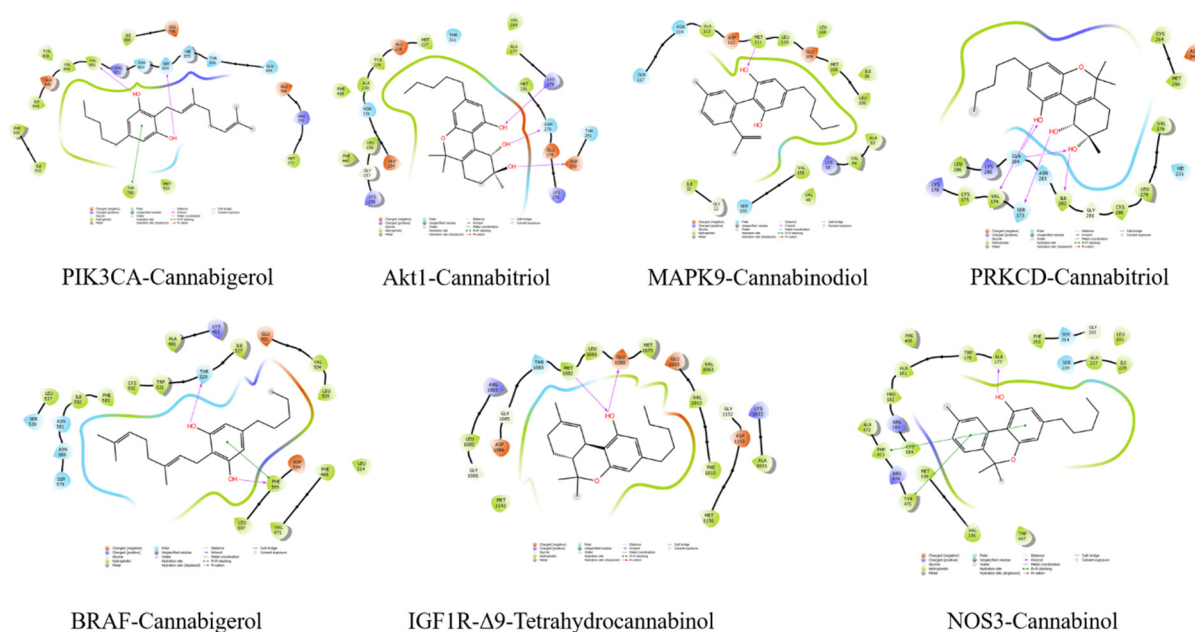

**Figure S4.** Egg boil diagram of Cannabigerol and Cannabichromene imported from SwissADME.

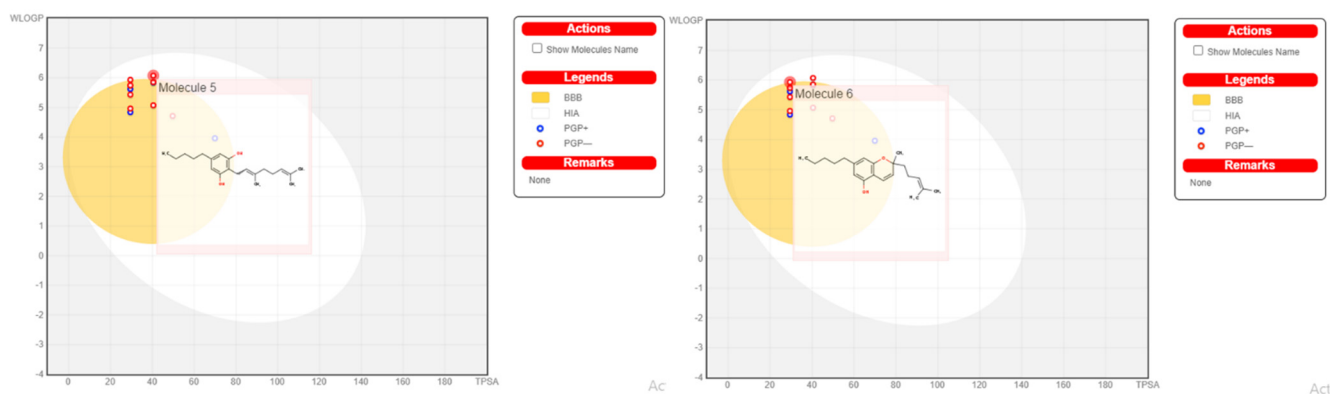

## Supplementary Tables.

**Table S1. Results of BindingDB Database**

| Sr. No. | Target Name              | Uploaded compounds | Max | Hits | Ki  | IC <sub>50</sub> | Kd | EC <sub>50</sub> | Download | UniProt ID | UniProt Name           | Organism       | Gene       |
|---------|--------------------------|--------------------|-----|------|-----|------------------|----|------------------|----------|------------|------------------------|----------------|------------|
| 1       | Cannabinoid receptor 1   | 11                 | 1   | 227  | 395 | 12               | 29 | 380              | 2D3DTSV  | P21554     | Cannabinoid receptor 1 | Humans (Human) | CNR1 (CNR) |
| 2       | Cannabinoid receptor 1/2 | 4                  | 1   | 14   | 14  | 5                | 0  | 0                | 2D3DTSV  | P21554     | Cannabinoid receptor 1 | Humans         | CNR1 (CNR) |

|        |                                    |    |   |             |             |        |   |    |                   |                          |                                   |                                        |                                         |
|--------|------------------------------------|----|---|-------------|-------------|--------|---|----|-------------------|--------------------------|-----------------------------------|----------------------------------------|-----------------------------------------|
|        |                                    |    |   |             |             |        |   |    |                   |                          |                                   | (Hu<br>man)                            |                                         |
| 2      | Cannabi<br>noid<br>receptor<br>1/2 | 4  | 1 | 1<br>4      | 1<br>4      | 5      | 0 | 0  | 2D 3<br>D TS<br>V | P349<br>72               | Canna<br>binoid<br>recept<br>or 2 | Hom<br>o<br>sapie<br>ns<br>(Hu<br>man) | CNR<br>2<br>(CB2<br>A,<br>CB2<br>B)     |
| 3      | Cannabi<br>noid<br>receptor<br>2   | 11 | 1 | 1<br>7<br>5 | 3<br>5<br>8 | 1<br>3 | 0 | 27 | 2D 3<br>D TS<br>V | P349<br>72               | Canna<br>binoid<br>recept<br>or 2 | Hom<br>o<br>sapie<br>ns<br>(Hu<br>man) | CNR<br>2<br>(CB2<br>A,<br>CB2<br>B)     |
| 4      | Caspase-<br>1                      | 2  | 1 | 1           | 0           | 0      | 2 | 0  | 2D 3<br>D TS<br>V | P294<br>66               | Caspa<br>se-1                     | Hom<br>o<br>sapie<br>ns<br>(Hu<br>man) | CAS<br>P1<br>(IL1<br>BC,<br>IL1B<br>CE) |
| 5      | Cholines<br>terase                 | 2  | 1 | 1           | 0           | 1      | 0 | 0  | 2D 3<br>D TS<br>V | NOT<br>FOR<br>HUM<br>ANS |                                   |                                        |                                         |
| 6      | Cytochr<br>ome<br>P450<br>1A1      | 4  | 1 | 2           | 3           | 0      | 0 | 0  | 2D 3<br>D TS<br>V | P047<br>98               | Cytoc<br>hrome<br>P450<br>1A1     | Hom<br>o<br>sapie<br>ns<br>(Hu<br>man) | CYP<br>1A1                              |
| 7      | Cytochr<br>ome<br>P450<br>1A2      | 2  | 1 | 1           | 1           | 0      | 0 | 0  | 2D 3<br>D TS<br>V | P051<br>77               | Cytoc<br>hrome<br>P450<br>1A2     | Hom<br>o<br>sapie<br>ns<br>(Hu<br>man) | CYP<br>1A2                              |
| 8      | Cytochr<br>ome<br>P450<br>1B1      | 2  | 1 | 1           | 1           | 0      | 0 | 0  | 2D 3<br>D TS<br>V | Q166<br>78               | Cytoc<br>hrome<br>P450<br>1B1     | Hom<br>o<br>sapie<br>ns<br>(Hu<br>man) | CYP<br>1B1                              |
| 9      | Cytochr<br>ome<br>P450<br>2B6      | 2  | 1 | 1           | 1           | 0      | 0 | 0  | 2D 3<br>D TS<br>V | P208<br>13               | Cytoc<br>hrome<br>P450<br>2B6     | Hom<br>o<br>sapie<br>ns<br>(Hu<br>man) | CYP<br>2B6                              |
| 1<br>0 | Cytochr<br>ome<br>P450<br>2C19     | 2  | 1 | 1           | 1           | 0      | 0 | 0  | 2D 3<br>D TS<br>V | P332<br>61               | Cytoc<br>hrome<br>P450<br>2C19    | Hom<br>o<br>sapie<br>ns<br>(Hu<br>man) | CYP<br>2C19                             |

|    |                                                         |    |      |    |   |   |   |    |             |                |                               |                     |                     |
|----|---------------------------------------------------------|----|------|----|---|---|---|----|-------------|----------------|-------------------------------|---------------------|---------------------|
| 11 | Cytochrome P450 3A4                                     | 2  | 1    | 1  | 1 | 0 | 0 | 0  | 2D 3 D TS V | P08684         | Cytochrome P450 3A4           | Homosapiens (Human) | CYP3A4 (CYP3A3)     |
| 12 | Cytochrome P450 3A5                                     | 2  | 1    | 1  | 1 | 0 | 0 | 0  | 2D 3 D TS V | P20815         | Cytochrome P450 3A5           | Homosapiens (Human) | CYP3A5              |
| 13 | D(3) dopamine receptor                                  | 3  | 0.95 | 4  | 0 | 0 | 0 | 4  | 2D 3 D TS V | P35462         | D(3) dopamine receptor        | Homosapiens (Human) | DRD3                |
| 14 | Estrogen receptor                                       | 2  | 0.85 | 4  | 0 | 4 | 0 | 0  | 2D 3 D TS V | P03372         | Estrogen receptor             | Homosapiens (Human) | ESR1 (ESR, NR3A1)   |
| 15 | Estrogen receptor beta                                  | 2  | 0.85 | 5  | 0 | 5 | 0 | 0  | 2D 3 D TS V | Q92731         | Estrogen receptor beta        | Homosapiens (Human) | ESR2 (ESTRB, NR3A2) |
| 16 | Fatty acid-binding protein, liver                       | 5  | 0.94 | 3  | 3 | 0 | 0 | 0  | 2D 3 D TS V | NOT FOR HUMANS |                               |                     |                     |
| 17 | G-protein coupled receptor 55                           | 2  | 0.85 | 2  | 0 | 0 | 0 | 2  | 2D 3 D TS V | Q9Y2T6         | G-protein coupled receptor 55 | Homosapiens (Human) | GPR55               |
| 18 | Heat sensitive channel TRPV3                            | 2  | 1    | 1  | 0 | 1 | 0 | 1  | 2D 3 D TS V | NOT FOR HUMANS |                               |                     |                     |
| 19 | Transient receptor potential cation channel subfamily A | 10 | 1    | 10 | 0 | 4 | 0 | 11 | 2D 3 D TS V | NOT FOR HUMANS |                               |                     |                     |

|    |                                                                  |   |      |   |   |   |   |   |            |                |                                               |                |                    |
|----|------------------------------------------------------------------|---|------|---|---|---|---|---|------------|----------------|-----------------------------------------------|----------------|--------------------|
|    | member 1                                                         |   |      |   |   |   |   |   |            |                |                                               |                |                    |
| 20 | Transient receptor potential cation channel subfamily M member 8 | 5 | 1    | 5 | 0 | 5 | 0 | 0 | 2D 3D TS V | NOT FOR HUMANS |                                               |                |                    |
| 21 | Transient receptor potential cation channel subfamily V member 4 | 2 | 1    | 1 | 0 | 0 | 0 | 1 | 2D 3D TS V | NOT FOR HUMANS |                                               |                |                    |
| 22 | Vascular endothelial growth factor receptor 2                    | 3 | 0.92 | 7 | 7 | 0 | 0 | 0 | 2D 3D TS V | P35968         | Vascular endothelial growth factor receptor 2 | Humans (Human) | KDR (FLK1, VEGFR2) |

**Table S2. Results of the SwissTargetPrediction.**

| Target                                        | Common name | Uniprot ID | ChEMBL ID  | Target Class                        | Probability* | Known actives (3D/2D) | Compound name   |
|-----------------------------------------------|-------------|------------|------------|-------------------------------------|--------------|-----------------------|-----------------|
| Cannabinoid receptor 1                        | CNR1        | P21554     | CHEMBL218  | Family A G protein-coupled receptor | 0.218248     | 979 / 261             | Cannabichromene |
| Cannabinoid receptor 2                        | CNR2        | P34972     | CHEMBL253  | Family A G protein-coupled receptor | 0.176594     | 880 / 221             | Cannabichromene |
| Arachidonate 5-lipoxygenase                   | ALOX5       | P09917     | CHEMBL215  | Oxidoreductase                      | 0.109946     | 112 / 27              | Cannabichromene |
| 5-lipoxygenase activating protein             | ALOX5 AP    | P20292     | CHEMBL4550 | Other cytosolic protein             | 0.101614     | 73 / 0                | Cannabichromene |
| 11-beta-hydroxysteroid dehydrogenase 1        | HSD11B1     | P28845     | CHEMBL4235 | Enzyme                              | 0.101614     | 240 / 0               | Cannabichromene |
| Vascular endothelial growth factor receptor 2 | KDR         | P35968     | CHEMBL279  | Kinase                              | 0.101614     | 337 / 8               | Cannabichromene |

|                                                       |                            |                            |               |                                     |          |                  |                  |
|-------------------------------------------------------|----------------------------|----------------------------|---------------|-------------------------------------|----------|------------------|------------------|
| Bile acid receptor FXR                                | NR1H4                      | Q96RI1                     | CHEMBL2047    | Nuclear receptor                    | 0.101614 | 40 / 0Â Â Â Â Â  | Cannabichrome ne |
| Cystic fibrosis transmembrane conductance regulator   | CFTR                       | P13569                     | CHEMBL4051    | Other ion channel                   | 0.101614 | 11 / 0Â Â Â Â Â  | Cannabichrome ne |
| Leucine-rich repeat serine/threonine-protein kinase 2 | LRRK2                      | Q5S007                     | CHEMBL1075104 | Kinase                              | 0.101614 | 46 / 0Â Â Â Â Â  | Cannabichrome ne |
| NAD-dependent deacetylase sirtuin 2                   | SIRT2                      | Q8IXJ6                     | CHEMBL4462    | Eraser                              | 0.101614 | 34 / 0Â Â Â Â Â  | Cannabichrome ne |
| Corticotropin releasing factor receptor 1             | CRHR1                      | P34998                     | CHEMBL1800    | Family B G protein-coupled receptor | 0.101614 | 104 / 0Â Â Â Â Â | Cannabichrome ne |
| Calcium sensing receptor                              | CASR                       | P41180                     | CHEMBL1878    | Family C G protein-coupled receptor | 0.101614 | 36 / 0Â Â Â Â Â  | Cannabichrome ne |
| Phosphodiesterase 7A                                  | PDE7A                      | Q13946                     | CHEMBL3012    | Phosphodiesterase                   | 0.101614 | 28 / 0Â Â Â Â Â  | Cannabichrome ne |
| Pyroglutamylated RFamide peptide receptor             | QRFRP                      | Q96P65                     | CHEMBL5852    | Family A G protein-coupled receptor | 0.101614 | 9 / 0Â Â Â Â Â   | Cannabichrome ne |
| Melatonin receptor 1B                                 | MTNR1B                     | P49286                     | CHEMBL1946    | Family A G protein-coupled receptor | 0.101614 | 109 / 0Â Â Â Â Â | Cannabichrome ne |
| Kinesin-like protein 1                                | KIF11                      | P52732                     | CHEMBL4581    | Other cytosolic protein             | 0.101614 | 42 / 0Â Â Â Â Â  | Cannabichrome ne |
| GABA-A receptor; alpha-3/beta-3/gamma-2               | GABRB3<br>GABRA3<br>GABRG2 | P28472<br>P34903<br>P18507 | CHEMBL2094120 | Ligand-gated ion channel            | 0.101614 | 120 / 0Â Â Â Â Â | Cannabichrome ne |
| GABA-A receptor; alpha-1/beta-3/gamma-2               | GABRB3<br>GABRG2<br>GABRA1 | P28472<br>P18507<br>P14867 | CHEMBL2094121 | Ligand-gated ion channel            | 0.101614 | 100 / 0Â Â Â Â Â | Cannabichrome ne |
| GABA-A receptor; alpha-5/beta-3/gamma-2               | GABRB3<br>GABRG2<br>GABRA5 | P28472<br>P18507<br>P31644 | CHEMBL2094122 | Ligand-gated ion channel            | 0.101614 | 92 / 0Â Â Â Â Â  | Cannabichrome ne |
| GABA-A receptor; alpha-2/beta-3/gamma-2               | GABRA2<br>GABRB3<br>GABRG2 | P47869<br>P28472<br>P18507 | CHEMBL2094130 | Ligand-gated ion channel            | 0.101614 | 112 / 0Â Â Â Â Â | Cannabichrome ne |
| N-arachidonyl glycine receptor                        | GPR18                      | Q14330                     | CHEMBL2384898 | Family A G protein-                 | 0.101614 | 9 / 1Â Â Â Â Â   | Cannabichrome ne |



|                                    |         |        |               |                                            |          |                  |                  |
|------------------------------------|---------|--------|---------------|--------------------------------------------|----------|------------------|------------------|
|                                    |         |        |               | coupled receptor                           |          |                  |                  |
| Glycine receptor subunit alpha-1   | GLRA1   | P23415 | CHEMBL5845    | Ligand-gated ion channel                   | 0.101614 | 1 / 1Â Â Â Â Â   | Cannabichrome ne |
| Cyclooxygenase-1                   | PTGS1   | P23219 | CHEMBL221     | Oxidoreductase                             | 0.101614 | 46 / 32Â Â Â Â Â | Cannabichrome ne |
| P2X purinoceptor 3                 | P2RX3   | P56373 | CHEMBL2998    | Ligand-gated ion channel                   | 0.101614 | 38 / 0Â Â Â Â Â  | Cannabichrome ne |
| Glucocorticoid receptor            | NR3C1   | P04150 | CHEMBL2034    | Nuclear receptor                           | 0.101614 | 147 / 0Â Â Â Â Â | Cannabichrome ne |
| Progesterone receptor              | PGR     | P06401 | CHEMBL208     | Nuclear receptor                           | 0.101614 | 65 / 0Â Â Â Â Â  | Cannabichrome ne |
| Tyrosine-protein kinase SRC        | SRC     | P12931 | CHEMBL267     | Kinase                                     | 0.101614 | 133 / 1Â Â Â Â Â | Cannabichrome ne |
| Phosphodiesterase 5A               | PDE5A   | O76074 | CHEMBL1827    | Phosphodiesterase                          | 0.101614 | 183 / 0Â Â Â Â Â | Cannabichrome ne |
| Histone deacetylase 2              | HDAC2   | Q92769 | CHEMBL1937    | Eraser                                     | 0.101614 | 36 / 0Â Â Â Â Â  | Cannabichrome ne |
| Histone deacetylase 1              | HDAC1   | Q13547 | CHEMBL325     | Eraser                                     | 0.101614 | 109 / 0Â Â Â Â Â | Cannabichrome ne |
| G-protein coupled receptor 55      | GPR55   | Q9Y2T6 | CHEMBL1075322 | Family A G protein-coupled receptor        | 0.101614 | 15 / 0Â Â Â Â Â  | Cannabichrome ne |
| Adenosine A1 receptor              | ADORA1  | P30542 | CHEMBL226     | Family A G protein-coupled receptor        | 0.101614 | 367 / 0Â Â Â Â Â | Cannabichrome ne |
| Adenosine A2a receptor             | ADORA2A | P29274 | CHEMBL251     | Family A G protein-coupled receptor        | 0.101614 | 284 / 0Â Â Â Â Â | Cannabichrome ne |
| Adenosine A3 receptor              | ADORA3  | P0DMS8 | CHEMBL256     | Family A G protein-coupled receptor        | 0.101614 | 265 / 0Â Â Â Â Â | Cannabichrome ne |
| Cytochrome b-c1 complex subunit 7  | UQCRB   | P14927 | CHEMBL1671612 | Transmembrane 1-electron transfer carriers | 0.101614 | 1 / 0Â Â Â Â Â   | Cannabichrome ne |
| ADAMTS5                            | ADAMTS5 | Q9UNA0 | CHEMBL2285    | Protease                                   | 0.101614 | 31 / 0Â Â Â Â Â  | Cannabichrome ne |
| Translocator protein (by homology) | TSPO    | P30536 | CHEMBL5742    | Membrane receptor                          | 0.101614 | 267 / 0Â Â Â Â Â | Cannabichrome ne |
| Serotonin 2c (5-HT2c) receptor     | HTR2C   | P28335 | CHEMBL225     | Family A G protein-coupled receptor        | 0.101614 | 68 / 0Â Â Â Â Â  | Cannabichrome ne |
| Estradiol 17-beta-dehydrogenase 2  | HSD17B2 | P37059 | CHEMBL2789    | Enzyme                                     | 0.101614 | 21 / 0Â Â Â Â Â  | Cannabichrome ne |
| Interleukin-8 receptor A           | CXCR1   | P25024 | CHEMBL4029    | Family A G protein-coupled receptor        | 0.101614 | 32 / 0Â Â Â Â Â  | Cannabichrome ne |
| Pantothenate kinase 3              | PANK3   | Q9H999 | CHEMBL3407328 | Enzyme                                     | 0.101614 | 7 / 0Â Â Â Â Â   | Cannabichrome ne |

|                                                             |               |               |               |                                     |          |                  |                  |
|-------------------------------------------------------------|---------------|---------------|---------------|-------------------------------------|----------|------------------|------------------|
| Neuropeptide Y receptor type 5                              | NPY5R         | Q15761        | CHEMBL4561    | Family A G protein-coupled receptor | 0.101614 | 212 / 0Â Â Â Â Â | Cannabichrome ne |
| Purinergic receptor P2Y1                                    | P2RY1         | P47900        | CHEMBL4315    | Family A G protein-coupled receptor | 0.101614 | 23 / 0Â Â Â Â Â  | Cannabichrome ne |
| Cathepsin K                                                 | CTSK          | P43235        | CHEMBL268     | Protease                            | 0        | 324 / 1Â Â Â Â Â | Cannabichrome ne |
| Kinesin-1 heavy chain/ Tyrosine-protein kinase receptor RET | RET           | P07949        | CHEMBL2041    | Kinase                              | 0        | 28 / 0Â Â Â Â Â  | Cannabichrome ne |
| Epoxide hydratase                                           | EPHX2         | P34913        | CHEMBL2409    | Protease                            | 0        | 222 / 0Â Â Â Â Â | Cannabichrome ne |
| Prenyl protein specific protease                            | RCE1          | Q9Y256        | CHEMBL3411    | Protease                            | 0        | 6 / 0Â Â Â Â Â   | Cannabichrome ne |
| Methyl-CpG-binding protein 2                                | MECP2         | P51608        | CHEMBL3638346 | Reader                              | 0        | 1 / 0Â Â Â Â Â   | Cannabichrome ne |
| Methyl-CpG-binding domain protein 2                         | MBD2          | Q9UBB5        | CHEMBL3707462 | Reader                              | 0        | 2 / 0Â Â Â Â Â   | Cannabichrome ne |
| Receptor protein-tyrosine kinase erbB-2                     | ERBB2         | P04626        | CHEMBL1824    | Kinase                              | 0        | 84 / 0Â Â Â Â Â  | Cannabichrome ne |
| Vascular endothelial growth factor receptor 1 (by homology) | FLT1          | P17948        | CHEMBL1868    | Kinase                              | 0        | 89 / 0Â Â Â Â Â  | Cannabichrome ne |
| Glutamate NMDA receptor; GRIN1/GRIN2B                       | GRIN1 GRIN2B  | Q05586 Q13224 | CHEMBL1907603 | Ligand-gated ion channel            | 0        | 3 / 0Â Â Â Â Â   | Cannabichrome ne |
| Cyclophilin A                                               | PPIA          | P62937        | CHEMBL1949    | Isomerase                           | 0        | 39 / 0Â Â Â Â Â  | Cannabichrome ne |
| Hexokinase type IV                                          | GCK           | P35557        | CHEMBL3820    | Enzyme                              | 0        | 96 / 0Â Â Â Â Â  | Cannabichrome ne |
| Phosphodiesterase 10A (by homology)                         | PDE10A        | Q9Y233        | CHEMBL4409    | Phosphodies terase                  | 0        | 909 / 0Â Â Â Â Â | Cannabichrome ne |
| Phosphodiesterase 2A                                        | PDE2A         | O00408        | CHEMBL2652    | Phosphodies terase                  | 0        | 53 / 0Â Â Â Â Â  | Cannabichrome ne |
| Cholecystokinin B receptor                                  | CCKBR         | P32239        | CHEMBL298     | Family A G protein-coupled receptor | 0        | 386 / 0Â Â Â Â Â | Cannabichrome ne |
| Carnitine O-palmitoyltransferase 1, liver isoform           | CPT1A         | P50416        | CHEMBL1293194 | Enzyme                              | 0        | 91 / 0Â Â Â Â Â  | Cannabichrome ne |
| GABA-A receptor; GABA-A site (alpha1/beta2 interface)       | GABRA1 GABRB2 | P14867 P47870 | CHEMBL1907597 | Ligand-gated ion channel            | 0        | 5 / 0Â Â Â Â Â   | Cannabichrome ne |
| Dopamine D3 receptor                                        | DRD3          | P35462        | CHEMBL234     | Family A G protein-coupled receptor | 0        | 90 / 0Â Â Â Â Â  | Cannabichrome ne |
| LDL-associated phospholipase A2                             | PLA2G7        | Q13093        | CHEMBL3514    | Enzyme                              | 0        | 32 / 0Â Â Â Â Â  | Cannabichrome ne |
| Acyl-CoA desaturase (by homology)                           | SCD           | O00767        | CHEMBL5555    | Enzyme                              | 0        | 32 / 0Â Â Â Â Â  | Cannabichrome ne |

|                                                    |           |        |               |                                     |   |         |                  |
|----------------------------------------------------|-----------|--------|---------------|-------------------------------------|---|---------|------------------|
| Histone deacetylase 6                              | HDAC6     | Q9UBN7 | CHEMBL1865    | Eraser                              | 0 | 67 / 0  | Cannabichrome ne |
| Muscarinic acetylcholine receptor M1 (by homology) | CHRM1     | P11229 | CHEMBL216     | Family A G protein-coupled receptor | 0 | 55 / 0  | Cannabichrome ne |
| Beta secretase 2                                   | BACE2     | Q9Y5Z0 | CHEMBL2525    | Protease                            | 0 | 106 / 0 | Cannabichrome ne |
| Histone deacetylase 8                              | HDAC8     | Q9BY41 | CHEMBL3192    | Eraser                              | 0 | 22 / 0  | Cannabichrome ne |
| Sphingosine 1-phosphate receptor Edg-3             | S1PR3     | Q99500 | CHEMBL3892    | Family A G protein-coupled receptor | 0 | 91 / 0  | Cannabichrome ne |
| Orexin receptor 2                                  | HCRT2     | O43614 | CHEMBL4792    | Family A G protein-coupled receptor | 0 | 561 / 0 | Cannabichrome ne |
| Orexin receptor 1                                  | HCRT1     | O43613 | CHEMBL5113    | Family A G protein-coupled receptor | 0 | 495 / 0 | Cannabichrome ne |
| Fibroblast growth factor receptor 1                | FGFR1     | P11362 | CHEMBL3650    | Kinase                              | 0 | 54 / 1  | Cannabichrome ne |
| Dihydroorotate dehydrogenase                       | DHODH     | Q02127 | CHEMBL1966    | Oxidoreductase                      | 0 | 10 / 0  | Cannabichrome ne |
| Isocitrate dehydrogenase [NADP] cytoplasmic        | IDH1      | O75874 | CHEMBL2007625 | Enzyme                              | 0 | 94 / 0  | Cannabichrome ne |
| Metabotropic glutamate receptor 5                  | GRM5      | P41594 | CHEMBL3227    | Family C G protein-coupled receptor | 0 | 534 / 0 | Cannabichrome ne |
| Serotonin 5a (5-HT5a) receptor                     | HTR5A     | P47898 | CHEMBL3426    | Family A G protein-coupled receptor | 0 | 8 / 0   | Cannabichrome ne |
| Neurokinin 2 receptor                              | TACR2     | P21452 | CHEMBL2327    | Family A G protein-coupled receptor | 0 | 24 / 0  | Cannabichrome ne |
| Cyclin-dependent kinase 4                          | CDK4      | P11802 | CHEMBL331     | Kinase                              | 0 | 45 / 0  | Cannabichrome ne |
| Heat shock protein HSP 90-alpha                    | HSP90A A1 | P07900 | CHEMBL3880    | Other cytosolic protein             | 0 | 40 / 0  | Cannabichrome ne |
| Neurokinin 3 receptor                              | TACR3     | P29371 | CHEMBL4429    | Family A G protein-coupled receptor | 0 | 134 / 0 | Cannabichrome ne |
| Tankyrase-2                                        | TNKS2     | Q9H2K2 | CHEMBL6154    | Enzyme                              | 0 | 26 / 0  | Cannabichrome ne |
| Tyrosine-protein kinase ABL                        | ABL1      | P00519 | CHEMBL1862    | Kinase                              | 0 | 125 / 0 | Cannabichrome ne |
| P2X purinoceptor 7                                 | P2RX7     | Q99572 | CHEMBL4805    | Ligand-gated ion channel            | 0 | 136 / 0 | Cannabichrome ne |
| Hepatocyte growth factor receptor                  | MET       | P08581 | CHEMBL3717    | Kinase                              | 0 | 209 / 5 | Cannabichrome ne |

|                                                        |                                                     |                                                          |               |                                     |          |           |                  |
|--------------------------------------------------------|-----------------------------------------------------|----------------------------------------------------------|---------------|-------------------------------------|----------|-----------|------------------|
| FK506-binding protein 1A                               | FKBP1A                                              | P62942                                                   | CHEMBL1902    | Isomerase                           | 0        | 82 / 0    | Cannabichrome ne |
| Phosphodiesterase 4B                                   | PDE4B                                               | Q07343                                                   | CHEMBL275     | Phosphodies terase                  | 0        | 82 / 0    | Cannabichrome ne |
| Cyclin-dependent kinase 2                              | CDK2                                                | P24941                                                   | CHEMBL301     | Kinase                              | 0        | 92 / 0    | Cannabichrome ne |
| Cyclin-dependent kinase 1                              | CDK1                                                | P06493                                                   | CHEMBL308     | Kinase                              | 0        | 60 / 0    | Cannabichrome ne |
| Glutaminy-peptide cyclotransferase                     | QPCT                                                | Q16769                                                   | CHEMBL4508    | Enzyme                              | 0        | 32 / 0    | Cannabichrome ne |
| Sodium channel protein type V alpha subunit            | SCN5A                                               | Q14524                                                   | CHEMBL1980    | Voltage-gated ion channel           | 0        | 23 / 0    | Cannabichrome ne |
| Anandamide amidohydrolase                              | FAAH                                                | O00519                                                   | CHEMBL2243    | Enzyme                              | 0        | 199 / 0   | Cannabichrome ne |
| Matrix metalloproteinase 3                             | MMP3                                                | P08254                                                   | CHEMBL283     | Protease                            | 0        | 49 / 0    | Cannabichrome ne |
| Matrix metalloproteinase 1                             | MMP1                                                | P03956                                                   | CHEMBL332     | Protease                            | 0        | 57 / 0    | Cannabichrome ne |
| Sodium channel protein type II alpha subunit           | SCN2A                                               | Q99250                                                   | CHEMBL4187    | Voltage-gated ion channel           | 0        | 32 / 0    | Cannabichrome ne |
| Glucagon receptor                                      | GCGR                                                | P47871                                                   | CHEMBL1985    | Family B G protein-coupled receptor | 0        | 43 / 0    | Cannabichrome ne |
| Gamma-secretase                                        | PSEN2<br>PSENEN<br>NCSTN<br>APH1A<br>PSEN1<br>APH1B | P49810<br>Q9NZ42<br>Q92542<br>Q96BI3<br>P49768<br>Q8WW43 | CHEMBL2094135 | Protease                            | 0        | 176 / 0   | Cannabichrome ne |
| 6-phosphofructo-2-kinase/fructose-2,6-bisphosphatase 3 | PFKFB3                                              | Q16875                                                   | CHEMBL2331053 | Enzyme                              | 0        | 90 / 0    | Cannabichrome ne |
| MAP kinase p38 alpha                                   | MAPK14                                              | Q16539                                                   | CHEMBL260     | Kinase                              | 0        | 447 / 0   | Cannabichrome ne |
| Serotonin 6 (5-HT6) receptor                           | HTR6                                                | P50406                                                   | CHEMBL3371    | Family A G protein-coupled receptor | 0        | 118 / 0   | Cannabichrome ne |
| Bombesin receptor subtype-3                            | BRS3                                                | P32247                                                   | CHEMBL4080    | Family A G protein-coupled receptor | 0        | 5 / 0     | Cannabichrome ne |
| G-protein coupled bile acid receptor 1                 | GPBAR1                                              | Q8TDU6                                                   | CHEMBL5409    | Family A G protein-coupled receptor | 0        | 35 / 0    | Cannabichrome ne |
| Elongation of very long chain fatty acids protein 6    | ELOVL6                                              | Q9H5J4                                                   | CHEMBL5704    | Enzyme                              | 0        | 17 / 0    | Cannabichrome ne |
| Cannabinoid receptor 1                                 | CNR1                                                | P21554                                                   | CHEMBL218     | Family A G protein-coupled receptor | 0.759876 | 846 / 386 | Cannabicyclol    |

|                                                                |        |        |               |                                     |          |                    |               |
|----------------------------------------------------------------|--------|--------|---------------|-------------------------------------|----------|--------------------|---------------|
| Cannabinoid receptor 2                                         | CNR2   | P34972 | CHEMBL253     | Family A G protein-coupled receptor | 0.759876 | 755 / 379Â Â Â Â Â | Cannabicyclol |
| Vascular endothelial growth factor receptor 2                  | KDR    | P35968 | CHEMBL279     | Kinase                              | 0.134939 | 183 / 12Â Â Â Â Â  | Cannabicyclol |
| N-arachidonyl glycine receptor                                 | GPR18  | Q14330 | CHEMBL2384898 | Family A G protein-coupled receptor | 0.12661  | 2 / 2Â Â Â Â Â     | Cannabicyclol |
| Glycine receptor subunit alpha-1                               | GLRA1  | P23415 | CHEMBL5845    | Ligand-gated ion channel            | 0.12661  | 1 / 2Â Â Â Â Â     | Cannabicyclol |
| PH domain leucine-rich repeat-containing protein phosphatase 1 | PHLPP1 | O60346 | CHEMBL3414405 | Reader                              | 0.109946 | 0 / 3Â Â Â Â Â     | Cannabicyclol |
| Serine/threonine-protein kinase ILK-1                          | ILK    | Q13418 | CHEMBL5247    | Kinase                              | 0.109946 | 0 / 2Â Â Â Â Â     | Cannabicyclol |
| Serine/threonine-protein kinase AKT                            | AKT1   | P31749 | CHEMBL4282    | Kinase                              | 0.101614 | 14 / 19Â Â Â Â Â   | Cannabicyclol |
| Arachidonate 5-lipoxygenase                                    | ALOX5  | P09917 | CHEMBL215     | Oxidoreductase                      | 0.101614 | 51 / 26Â Â Â Â Â   | Cannabicyclol |
| Cystic fibrosis transmembrane conductance regulator            | CFTR   | P13569 | CHEMBL4051    | Other ion channel                   | 0.101614 | 4 / 0Â Â Â Â Â     | Cannabicyclol |
| Estrogen receptor beta                                         | ESR2   | Q92731 | CHEMBL242     | Nuclear receptor                    | 0.101614 | 19 / 72Â Â Â Â Â   | Cannabicyclol |
| Glucagon receptor                                              | GCGR   | P47871 | CHEMBL1985    | Family B G protein-coupled receptor | 0.101614 | 30 / 0Â Â Â Â Â    | Cannabicyclol |
| Cathepsin D                                                    | CTSD   | P07339 | CHEMBL2581    | Protease                            | 0.101614 | 33 / 0Â Â Â Â Â    | Cannabicyclol |
| G-protein coupled receptor 55                                  | GPR55  | Q9Y2T6 | CHEMBL1075322 | Family A G protein-coupled receptor | 0.101614 | 13 / 1Â Â Â Â Â    | Cannabicyclol |
| Presenilin 1                                                   | PSEN1  | P49768 | CHEMBL2473    | Other ion channel                   | 0.101614 | 0 / 7Â Â Â Â Â     | Cannabicyclol |
| Estrogen receptor alpha                                        | ESR1   | P03372 | CHEMBL206     | Nuclear receptor                    | 0.101614 | 22 / 76Â Â Â Â Â   | Cannabicyclol |
| NAD-dependent deacetylase sirtuin 2                            | SIRT2  | Q8IXJ6 | CHEMBL4462    | Eraser                              | 0.101614 | 23 / 19Â Â Â Â Â   | Cannabicyclol |
| Protein kinase C (PKC)                                         | PRKCZ  | Q05513 | CHEMBL3438    | Kinase                              | 0.101614 | 2 / 0Â Â Â Â Â     | Cannabicyclol |
| Nitric oxide synthase, inducible (by homology)                 | NOS2   | P35228 | CHEMBL4481    | Enzyme                              | 0.101614 | 80 / 0Â Â Â Â Â    | Cannabicyclol |
| Kinesin-like protein 1                                         | KIF11  | P52732 | CHEMBL4581    | Other cytosolic protein             | 0.101614 | 35 / 0Â Â Â Â Â    | Cannabicyclol |
| Bile acid receptor FXR                                         | NR1H4  | Q96R11 | CHEMBL2047    | Nuclear receptor                    | 0.101614 | 30 / 18Â Â Â Â Â   | Cannabicyclol |
| Prostaglandin E synthase                                       | PTGES  | O14684 | CHEMBL5658    | Enzyme                              | 0.101614 | 24 / 8Â Â Â Â Â    | Cannabicyclol |

|                                                                 |                |                  |               |                                     |          |                      |               |
|-----------------------------------------------------------------|----------------|------------------|---------------|-------------------------------------|----------|----------------------|---------------|
| Voltage-gated potassium channel, KQT; KCNQ2(Kv7.2)/KCNQ3(Kv7.3) | KCNQ3<br>KCNQ2 | O43525<br>O43526 | CHEMBL2221348 | Voltage-gated ion channel           | 0.101614 | 8 /<br>0Â Â Â Â Â    | Cannabicyclol |
| Quinone reductase 2                                             | NQO2           | P16083           | CHEMBL3959    | Enzyme                              | 0.101614 | 9 /<br>0Â Â Â Â Â    | Cannabicyclol |
| Corticotropin releasing factor receptor 1                       | CRHR1          | P34998           | CHEMBL1800    | Family B G protein-coupled receptor | 0.101614 | 107 /<br>0Â Â Â Â Â  | Cannabicyclol |
| Voltage-gated potassium channel subunit Kv1.5                   | KCNA5          | P22460           | CHEMBL4306    | Voltage-gated ion channel           | 0.101614 | 109 /<br>0Â Â Â Â Â  | Cannabicyclol |
| Beta secretase 2                                                | BACE2          | Q9Y5Z0           | CHEMBL2525    | Protease                            | 0.101614 | 50 /<br>0Â Â Â Â Â   | Cannabicyclol |
| Thromboxane A2 receptor                                         | TBXA2R         | P21731           | CHEMBL2069    | Family A G protein-coupled receptor | 0.101614 | 6 /<br>0Â Â Â Â Â    | Cannabicyclol |
| Prenyl protein specific protease                                | RCE1           | Q9Y256           | CHEMBL3411    | Protease                            | 0.101614 | 6 /<br>0Â Â Â Â Â    | Cannabicyclol |
| Peregrin                                                        | BRPF1          | P55201           | CHEMBL3132741 | Reader                              | 0.101614 | 28 /<br>0Â Â Â Â Â   | Cannabicyclol |
| Hormone sensitive lipase                                        | LIPE           | Q05469           | CHEMBL3590    | Enzyme                              | 0.101614 | 51 /<br>0Â Â Â Â Â   | Cannabicyclol |
| Beta-secretase 1                                                | BACE1          | P56817           | CHEMBL4822    | Protease                            | 0.101614 | 202 /<br>12Â Â Â Â Â | Cannabicyclol |
| Thymidylate synthase                                            | TYMS           | P04818           | CHEMBL1952    | Transferase                         | 0.101614 | 19 /<br>0Â Â Â Â Â   | Cannabicyclol |
| Poly [ADP-ribose] polymerase-1                                  | PARP1          | P09874           | CHEMBL3105    | Enzyme                              | 0.101614 | 24 /<br>0Â Â Â Â Â   | Cannabicyclol |
| LDL-associated phospholipase A2                                 | PLA2G7         | Q13093           | CHEMBL3514    | Enzyme                              | 0.101614 | 17 /<br>0Â Â Â Â Â   | Cannabicyclol |
| Protoporphyrinogen oxidase                                      | PPOX           | P50336           | CHEMBL1926488 | Oxidoreductase                      | 0.101614 | 2 /<br>0Â Â Â Â Â    | Cannabicyclol |
| ADAMTS5                                                         | ADAMTS5        | Q9UNA0           | CHEMBL2285    | Protease                            | 0.101614 | 19 /<br>0Â Â Â Â Â   | Cannabicyclol |
| Melanocortin receptor 4                                         | MC4R           | P32245           | CHEMBL259     | Family A G protein-coupled receptor | 0.101614 | 13 /<br>0Â Â Â Â Â   | Cannabicyclol |
| Arachidonate 15-lipoxygenase                                    | ALOX15         | P16050           | CHEMBL2903    | Enzyme                              | 0.101614 | 19 /<br>12Â Â Â Â Â  | Cannabicyclol |
| Isocitrate dehydrogenase [NADP] cytoplasmic                     | IDH1           | O75874           | CHEMBL2007625 | Enzyme                              | 0.101614 | 179 /<br>0Â Â Â Â Â  | Cannabicyclol |
| Neurokinin 2 receptor                                           | TACR2          | P21452           | CHEMBL2327    | Family A G protein-coupled receptor | 0.101614 | 10 /<br>0Â Â Â Â Â   | Cannabicyclol |
| Neurokinin 3 receptor                                           | TACR3          | P29371           | CHEMBL4429    | Family A G protein-coupled receptor | 0.101614 | 110 /<br>0Â Â Â Â Â  | Cannabicyclol |
| Protein-tyrosine phosphatase 1B                                 | PTPN1          | P18031           | CHEMBL335     | Phosphatase                         | 0.101614 | 7 /<br>6Â Â Â Â Â    | Cannabicyclol |
| Methyl-CpG-binding protein 2                                    | MECP2          | P51608           | CHEMBL3638346 | Reader                              | 0        | 1 /<br>0Â Â Â Â Â    | Cannabicyclol |

|                                                       |                                 |                                      |               |                                     |   |                                                  |               |
|-------------------------------------------------------|---------------------------------|--------------------------------------|---------------|-------------------------------------|---|--------------------------------------------------|---------------|
| Methyl-CpG-binding domain protein 2                   | MBD2                            | Q9UBB5                               | CHEMBL3707462 | Reader                              | 0 | $\frac{2}{0 \hat{A} \hat{A} \hat{A} \hat{A}}$    | Cannabicyclol |
| Serine/threonine-protein kinase PAK 1                 | PAK1                            | Q13153                               | CHEMBL4600    | Kinase                              | 0 | $\frac{2}{0 \hat{A} \hat{A} \hat{A} \hat{A}}$    | Cannabicyclol |
| Vanilloid receptor                                    | TRPV1                           | Q8NER1                               | CHEMBL4794    | Voltage-gated ion channel           | 0 | $\frac{145}{2 \hat{A} \hat{A} \hat{A} \hat{A}}$  | Cannabicyclol |
| Leucine-rich repeat serine/threonine-protein kinase 2 | LRRK2                           | Q5S007                               | CHEMBL1075104 | Kinase                              | 0 | $\frac{24}{0 \hat{A} \hat{A} \hat{A} \hat{A}}$   | Cannabicyclol |
| Histone deacetylase 2                                 | HDAC2                           | Q92769                               | CHEMBL1937    | Eraser                              | 0 | $\frac{10}{0 \hat{A} \hat{A} \hat{A} \hat{A}}$   | Cannabicyclol |
| Metabotropic glutamate receptor 2                     | GRM2                            | Q14416                               | CHEMBL5137    | Family C G protein-coupled receptor | 0 | $\frac{28}{63 \hat{A} \hat{A} \hat{A} \hat{A}}$  | Cannabicyclol |
| Adenosine A2a receptor                                | ADORA2A                         | P29274                               | CHEMBL251     | Family A G protein-coupled receptor | 0 | $\frac{113}{0 \hat{A} \hat{A} \hat{A} \hat{A}}$  | Cannabicyclol |
| Sodium channel protein type II alpha subunit          | SCN2A                           | Q99250                               | CHEMBL4187    | Voltage-gated ion channel           | 0 | $\frac{29}{0 \hat{A} \hat{A} \hat{A} \hat{A}}$   | Cannabicyclol |
| Translocator protein (by homology)                    | TSPO                            | P30536                               | CHEMBL5742    | Membrane receptor                   | 0 | $\frac{350}{0 \hat{A} \hat{A} \hat{A} \hat{A}}$  | Cannabicyclol |
| Cathepsin K                                           | CTSK                            | P43235                               | CHEMBL268     | Protease                            | 0 | $\frac{168}{0 \hat{A} \hat{A} \hat{A} \hat{A}}$  | Cannabicyclol |
| Serotonin 2a (5-HT2a) receptor (by homology)          | HTR2A                           | P28223                               | CHEMBL224     | Family A G protein-coupled receptor | 0 | $\frac{40}{101 \hat{A} \hat{A} \hat{A} \hat{A}}$ | Cannabicyclol |
| Bombesin receptor subtype-3                           | BRS3                            | P32247                               | CHEMBL4080    | Family A G protein-coupled receptor | 0 | $\frac{1}{0 \hat{A} \hat{A} \hat{A} \hat{A}}$    | Cannabicyclol |
| p53-binding protein Mdm-2                             | MDM2                            | Q00987                               | CHEMBL5023    | Other nuclear protein               | 0 | $\frac{72}{0 \hat{A} \hat{A} \hat{A} \hat{A}}$   | Cannabicyclol |
| Egl nine homolog 1                                    | EGLN1                           | Q9GZT9                               | CHEMBL5697    | Oxidoreductase                      | 0 | $\frac{5}{0 \hat{A} \hat{A} \hat{A} \hat{A}}$    | Cannabicyclol |
| GABA-A receptor; GABA-A site (alpha1/beta2 interface) | GABRA1<br>GABRB2                | P14867<br>P47870                     | CHEMBL1907597 | Ligand-gated ion channel            | 0 | $\frac{4}{0 \hat{A} \hat{A} \hat{A} \hat{A}}$    | Cannabicyclol |
| Phosphodiesterase 2A                                  | PDE2A                           | O00408                               | CHEMBL2652    | Phosphodiesterase                   | 0 | $\frac{52}{0 \hat{A} \hat{A} \hat{A} \hat{A}}$   | Cannabicyclol |
| Phosphodiesterase 10A                                 | PDE10A                          | Q9Y233                               | CHEMBL4409    | Phosphodiesterase                   | 0 | $\frac{364}{0 \hat{A} \hat{A} \hat{A} \hat{A}}$  | Cannabicyclol |
| Anandamide amidohydrolase                             | FAAH                            | O00519                               | CHEMBL2243    | Enzyme                              | 0 | $\frac{80}{0 \hat{A} \hat{A} \hat{A} \hat{A}}$   | Cannabicyclol |
| Cyclin-dependent kinase 5/CDK5 activator 1            | CDK5R1<br>CDK5                  | Q15078<br>Q00535                     | CHEMBL1907600 | Kinase                              | 0 | $\frac{74}{0 \hat{A} \hat{A} \hat{A} \hat{A}}$   | Cannabicyclol |
| Cyclin-dependent kinase 1/cyclin B                    | CCNB3<br>CDK1<br>CCNB1<br>CCNB2 | Q8WWL7<br>P06493<br>P14635<br>O95067 | CHEMBL2094127 | Other cytosolic protein             | 0 | $\frac{40}{0 \hat{A} \hat{A} \hat{A} \hat{A}}$   | Cannabicyclol |

|                                                  |                            |                            |               |                                            |   |         |               |
|--------------------------------------------------|----------------------------|----------------------------|---------------|--------------------------------------------|---|---------|---------------|
| Tyrosine-protein kinase JAK3                     | JAK3                       | P52333                     | CHEMBL2148    | Kinase                                     | 0 | 183 / 0 | Cannabicyclol |
| Tyrosine-protein kinase JAK1                     | JAK1                       | P23458                     | CHEMBL2835    | Kinase                                     | 0 | 65 / 0  | Cannabicyclol |
| Tyrosine-protein kinase JAK2                     | JAK2                       | O60674                     | CHEMBL2971    | Kinase                                     | 0 | 147 / 0 | Cannabicyclol |
| JAK3/JAK1                                        | JAK3<br>JAK1               | P52333<br>P23458           | CHEMBL3038491 | Kinase                                     | 0 | 16 / 0  | Cannabicyclol |
| Peroxisome proliferator-activated receptor alpha | PPARA                      | Q07869                     | CHEMBL239     | Nuclear receptor                           | 0 | 0 / 62  | Cannabicyclol |
| G-protein coupled bile acid receptor 1           | GPBAR1                     | Q8TDU6                     | CHEMBL5409    | Family A G protein-coupled receptor        | 0 | 30 / 0  | Cannabicyclol |
| Cytochrome b-c1 complex subunit 7                | UQCRB                      | P14927                     | CHEMBL1671612 | Transmembrane 1-electron transfer carriers | 0 | 1 / 0   | Cannabicyclol |
| Phosphodiesterase 7A                             | PDE7A                      | Q13946                     | CHEMBL3012    | Phosphodiesterase                          | 0 | 13 / 0  | Cannabicyclol |
| Leukotriene A4 hydrolase                         | LTA4H                      | P09960                     | CHEMBL4618    | Protease                                   | 0 | 10 / 0  | Cannabicyclol |
| L-lactate dehydrogenase A chain                  | LDHA                       | P00338                     | CHEMBL4835    | Enzyme                                     | 0 | 7 / 0   | Cannabicyclol |
| Serine/threonine-protein kinase Aurora-B         | AURKB                      | Q96GD4                     | CHEMBL2185    | Kinase                                     | 0 | 21 / 0  | Cannabicyclol |
| Focal adhesion kinase 1                          | PTK2                       | Q05397                     | CHEMBL2695    | Kinase                                     | 0 | 21 / 0  | Cannabicyclol |
| Serine/threonine-protein kinase PLK1             | PLK1                       | P53350                     | CHEMBL3024    | Kinase                                     | 0 | 15 / 0  | Cannabicyclol |
| Histone deacetylase 4                            | HDAC4                      | P56524                     | CHEMBL3524    | Eraser                                     | 0 | 6 / 0   | Cannabicyclol |
| Histone deacetylase 10                           | HDAC10                     | Q969S8                     | CHEMBL5103    | Eraser                                     | 0 | 4 / 0   | Cannabicyclol |
| GABA-A receptor; alpha-3/beta-3/gamma-2          | GABRB3<br>GABRA3<br>GABRG2 | P28472<br>P34903<br>P18507 | CHEMBL2094120 | Ligand-gated ion channel                   | 0 | 71 / 0  | Cannabicyclol |
| GABA-A receptor; alpha-1/beta-3/gamma-2          | GABRB3<br>GABRG2<br>GABRA1 | P28472<br>P18507<br>P14867 | CHEMBL2094121 | Ligand-gated ion channel                   | 0 | 57 / 0  | Cannabicyclol |
| GABA-A receptor; alpha-5/beta-3/gamma-2          | GABRB3<br>GABRG2<br>GABRA5 | P28472<br>P18507<br>P31644 | CHEMBL2094122 | Ligand-gated ion channel                   | 0 | 57 / 0  | Cannabicyclol |
| GABA-A receptor; alpha-2/beta-3/gamma-2          | GABRA2<br>GABRB3           | P47869<br>P28472<br>P18507 | CHEMBL2094130 | Ligand-gated ion channel                   | 0 | 64 / 0  | Cannabicyclol |



|                                                                                        |                 |                  |               |                                               |          |                       |               |
|----------------------------------------------------------------------------------------|-----------------|------------------|---------------|-----------------------------------------------|----------|-----------------------|---------------|
|                                                                                        | 3<br>GABRG<br>2 |                  |               |                                               |          |                       |               |
| Cholecystokinin B<br>receptor                                                          | CCKBR           | P32239           | CHEMBL298     | Family A G<br>protein-<br>coupled<br>receptor | 0        | 244 /<br>0Â Â Â Â Â   | Cannabicyclol |
| Melatonin receptor<br>1B                                                               | MTNR1<br>B      | P49286           | CHEMBL1946    | Family A G<br>protein-<br>coupled<br>receptor | 0        | 86 /<br>23Â Â Â Â Â   | Cannabicyclol |
| Glutamate NMDA<br>receptor;<br>GRIN1/GRIN2B                                            | GRIN1<br>GRIN2B | Q05586<br>Q13224 | CHEMBL1907603 | Ligand-<br>gated ion<br>channel               | 0        | 2 /<br>0Â Â Â Â Â     | Cannabicyclol |
| Muscarinic<br>acetylcholine<br>receptor M3                                             | CHRM3           | P20309           | CHEMBL245     | Family A G<br>protein-<br>coupled<br>receptor | 0        | 69 /<br>0Â Â Â Â Â    | Cannabicyclol |
| P2X purinoceptor 3                                                                     | P2RX3           | P56373           | CHEMBL2998    | Ligand-<br>gated ion<br>channel               | 0        | 47 /<br>0Â Â Â Â Â    | Cannabicyclol |
| Methionine<br>aminopeptidase 2                                                         | METAP<br>2      | P50579           | CHEMBL3922    | Protease                                      | 0        | 4 /<br>0Â Â Â Â Â     | Cannabicyclol |
| Orexin receptor 1                                                                      | HCRTR1          | O43613           | CHEMBL5113    | Family A G<br>protein-<br>coupled<br>receptor | 0        | 246 /<br>0Â Â Â Â Â   | Cannabicyclol |
| Oxytocin receptor<br>(by homology)                                                     | OXTR            | P30559           | CHEMBL2049    | Family A G<br>protein-<br>coupled<br>receptor | 0        | 51 /<br>0Â Â Â Â Â    | Cannabicyclol |
| Alpha-1,6-mannosyl-<br>glycoprotein 2-beta-<br>N-<br>acetylglucosaminyltr<br>ansferase | MGAT2           | Q10469           | CHEMBL2321630 | Enzyme                                        | 0        | 22 /<br>0Â Â Â Â Â    | Cannabicyclol |
| Histone deacetylase<br>6                                                               | HDAC6           | Q9UBN<br>7       | CHEMBL1865    | Eraser                                        | 0        | 25 /<br>3Â Â Â Â Â    | Cannabicyclol |
| Histone deacetylase<br>8                                                               | HDAC8           | Q9BY4<br>1       | CHEMBL3192    | Eraser                                        | 0        | 11 /<br>3Â Â Â Â Â    | Cannabicyclol |
| Dihydroorotate<br>dehydrogenase                                                        | DHODH           | Q02127           | CHEMBL1966    | Oxidoreduct<br>ase                            | 0        | 6 /<br>0Â Â Â Â Â     | Cannabicyclol |
| Thrombin and<br>coagulation factor X                                                   | F10             | P00742           | CHEMBL244     | Protease                                      | 0        | 98 /<br>0Â Â Â Â Â    | Cannabicyclol |
| Pyroglutamylated<br>RFamide peptide<br>receptor                                        | QRFPR           | Q96P65           | CHEMBL5852    | Family A G<br>protein-<br>coupled<br>receptor | 0        | 8 /<br>0Â Â Â Â Â     | Cannabicyclol |
| Carnitine O-<br>palmitoyltransferase<br>1, liver isoform                               | CPT1A           | P50416           | CHEMBL1293194 | Enzyme                                        | 0        | 41 /<br>0Â Â Â Â Â    | Cannabicyclol |
| Lysosomal Pro-X<br>carboxypeptidase                                                    | PRCP            | P42785           | CHEMBL2335    | Protease                                      | 0        | 11 /<br>0Â Â Â Â Â    | Cannabicyclol |
| Carboxypeptidase B                                                                     | CPB1            | P15086           | CHEMBL2552    | Protease                                      | 0        | 3 /<br>0Â Â Â Â Â     | Cannabicyclol |
|                                                                                        |                 |                  |               |                                               |          |                       |               |
| Cannabinoid receptor<br>1                                                              | CNR1            | P21554           | CHEMBL218     | Family A G<br>protein-                        | 0.893165 | 900 /<br>210Â Â Â Â Â | Cannabidiol   |

|                                                     |        |        |               |                                     |          |                     |             |
|-----------------------------------------------------|--------|--------|---------------|-------------------------------------|----------|---------------------|-------------|
|                                                     |        |        |               | coupled receptor                    |          |                     |             |
| Cannabinoid receptor 2                              | CNR2   | P34972 | CHEMBL253     | Family A G protein-coupled receptor | 0.893165 | 792 / 174 Å Å Å Å Å | Cannabidiol |
| G-protein coupled receptor 55                       | GPR55  | Q9Y2T6 | CHEMBL1075322 | Family A G protein-coupled receptor | 0.818184 | 14 / 2 Å Å Å Å Å    | Cannabidiol |
| Arachidonate 5-lipoxygenase                         | ALOX5  | P09917 | CHEMBL215     | Oxidoreductase                      | 0.101614 | 63 / 19 Å Å Å Å Å   | Cannabidiol |
| Cystic fibrosis transmembrane conductance regulator | CFTR   | P13569 | CHEMBL4051    | Other ion channel                   | 0.101614 | 13 / 0 Å Å Å Å Å    | Cannabidiol |
| Receptor protein-tyrosine kinase erbB-2             | ERBB2  | P04626 | CHEMBL1824    | Kinase                              | 0.101614 | 48 / 0 Å Å Å Å Å    | Cannabidiol |
| NAD-dependent deacetylase sirtuin 2                 | SIRT2  | Q8IXJ6 | CHEMBL4462    | Eraser                              | 0.101614 | 27 / 0 Å Å Å Å Å    | Cannabidiol |
| N-arachidonyl glycine receptor                      | GPR18  | Q14330 | CHEMBL2384898 | Family A G protein-coupled receptor | 0.101614 | 2 / 2 Å Å Å Å Å     | Cannabidiol |
| Glycine receptor subunit alpha-1                    | GLRA1  | P23415 | CHEMBL5845    | Ligand-gated ion channel            | 0.101614 | 1 / 1 Å Å Å Å Å     | Cannabidiol |
| DNA polymerase beta (by homology)                   | POLB   | P06746 | CHEMBL2392    | Enzyme                              | 0.101614 | 0 / 3 Å Å Å Å Å     | Cannabidiol |
| Calcium sensing receptor                            | CASR   | P41180 | CHEMBL1878    | Family C G protein-coupled receptor | 0.101614 | 38 / 0 Å Å Å Å Å    | Cannabidiol |
| Arachidonate 15-lipoxygenase                        | ALOX15 | P16050 | CHEMBL2903    | Enzyme                              | 0.101614 | 26 / 11 Å Å Å Å Å   | Cannabidiol |
| Cathepsin D                                         | CTSD   | P07339 | CHEMBL2581    | Protease                            | 0.101614 | 34 / 0 Å Å Å Å Å    | Cannabidiol |
| Beta-secretase 1                                    | BACE1  | P56817 | CHEMBL4822    | Protease                            | 0.101614 | 209 / 0 Å Å Å Å Å   | Cannabidiol |
| Vascular endothelial growth factor receptor 2       | KDR    | P35968 | CHEMBL279     | Kinase                              | 0.101614 | 259 / 12 Å Å Å Å Å  | Cannabidiol |
| Neurokinin 3 receptor                               | TACR3  | P29371 | CHEMBL4429    | Family A G protein-coupled receptor | 0.101614 | 116 / 0 Å Å Å Å Å   | Cannabidiol |
| Cyclooxygenase-2                                    | PTGS2  | P35354 | CHEMBL230     | Oxidoreductase                      | 0.101614 | 132 / 3 Å Å Å Å Å   | Cannabidiol |
| Poly [ADP-ribose] polymerase-1                      | PARP1  | P09874 | CHEMBL3105    | Enzyme                              | 0.101614 | 23 / 0 Å Å Å Å Å    | Cannabidiol |
| Prenyl protein specific protease                    | RCE1   | Q9Y256 | CHEMBL3411    | Protease                            | 0.101614 | 6 / 0 Å Å Å Å Å     | Cannabidiol |
| Bile acid receptor FXR                              | NR1H4  | Q96R11 | CHEMBL2047    | Nuclear receptor                    | 0.101614 | 30 / 0 Å Å Å Å Å    | Cannabidiol |
| Histone deacetylase 6                               | HDAC6  | Q9UBN7 | CHEMBL1865    | Eraser                              | 0.101614 | 23 / 0 Å Å Å Å Å    | Cannabidiol |
| Histone deacetylase 8                               | HDAC8  | Q9BY41 | CHEMBL3192    | Eraser                              | 0.101614 | 10 / 0 Å Å Å Å Å    | Cannabidiol |

|                                               |         |        |            |                                     |          |                  |             |
|-----------------------------------------------|---------|--------|------------|-------------------------------------|----------|------------------|-------------|
| Corticotropin releasing factor receptor 1     | CRHR1   | P34998 | CHEMBL1800 | Family B G protein-coupled receptor | 0.101614 | 130 / 0Â Â Â Â Â | Cannabidiol |
| Phosphodiesterase 4B                          | PDE4B   | Q07343 | CHEMBL275  | Phosphodiesterase                   | 0.101614 | 31 / 0Â Â Â Â Â  | Cannabidiol |
| ADAMTS5                                       | ADAMTS5 | Q9UNAO | CHEMBL2285 | Protease                            | 0.101614 | 33 / 0Â Â Â Â Â  | Cannabidiol |
| Epoxide hydratase                             | EPHX2   | P34913 | CHEMBL2409 | Protease                            | 0.101614 | 129 / 0Â Â Â Â Â | Cannabidiol |
| 11-beta-hydroxysteroid dehydrogenase 1        | HSD11B1 | P28845 | CHEMBL4235 | Enzyme                              | 0.101614 | 275 / 0Â Â Â Â Â | Cannabidiol |
| Translocator protein (by homology)            | TSPO    | P30536 | CHEMBL5742 | Membrane receptor                   | 0.101614 | 352 / 0Â Â Â Â Â | Cannabidiol |
| Serotonin 2b (5-HT2b) receptor                | HTR2B   | P41595 | CHEMBL1833 | Family A G protein-coupled receptor | 0.101614 | 40 / 0Â Â Â Â Â  | Cannabidiol |
| Cholesteryl ester transfer protein            | CETP    | P11597 | CHEMBL3572 | Other ion channel                   | 0.101614 | 7 / 2Â Â Â Â Â   | Cannabidiol |
| Quinone reductase 2                           | NQO2    | P16083 | CHEMBL3959 | Enzyme                              | 0.101614 | 8 / 0Â Â Â Â Â   | Cannabidiol |
| Prostanoid EP1 receptor                       | PTGER1  | P34995 | CHEMBL1811 | Family A G protein-coupled receptor | 0.101614 | 46 / 0Â Â Â Â Â  | Cannabidiol |
| Voltage-gated potassium channel subunit Kv1.5 | KCNA5   | P22460 | CHEMBL4306 | Voltage-gated ion channel           | 0.101614 | 116 / 0Â Â Â Â Â | Cannabidiol |
| L-lactate dehydrogenase B chain               | LDHB    | P07195 | CHEMBL4940 | Enzyme                              | 0.101614 | 2 / 0Â Â Â Â Â   | Cannabidiol |
| Thymidylate synthase                          | TYMS    | P04818 | CHEMBL1952 | Transferase                         | 0.101614 | 23 / 0Â Â Â Â Â  | Cannabidiol |
| Glucagon receptor                             | GCGR    | P47871 | CHEMBL1985 | Family B G protein-coupled receptor | 0.101614 | 34 / 0Â Â Â Â Â  | Cannabidiol |
| p53-binding protein Mdm-2                     | MDM2    | Q00987 | CHEMBL5023 | Other nuclear protein               | 0.101614 | 69 / 0Â Â Â Â Â  | Cannabidiol |
| Steryl-sulfatase                              | STS     | P08842 | CHEMBL3559 | Enzyme                              | 0.101614 | 6 / 0Â Â Â Â Â   | Cannabidiol |
| L-lactate dehydrogenase A chain               | LDHA    | P00338 | CHEMBL4835 | Enzyme                              | 0.101614 | 7 / 0Â Â Â Â Â   | Cannabidiol |
| Metabotropic glutamate receptor 2             | GRM2    | Q14416 | CHEMBL5137 | Family C G protein-coupled receptor | 0.101614 | 34 / 0Â Â Â Â Â  | Cannabidiol |
| Serine/threonine-protein kinase PAK 1         | PAK1    | Q13153 | CHEMBL4600 | Kinase                              | 0.101614 | 2 / 0Â Â Â Â Â   | Cannabidiol |
| Cholecystokinin B receptor (by homology)      | CCKBR   | P32239 | CHEMBL298  | Family A G protein-coupled receptor | 0.101614 | 278 / 0Â Â Â Â Â | Cannabidiol |
| Melatonin receptor 1B                         | MTNR1B  | P49286 | CHEMBL1946 | Family A G protein-                 | 0.101614 | 86 / 0Â Â Â Â Â  | Cannabidiol |

|                                                        |             |               |               |                                     |          |                  |             |
|--------------------------------------------------------|-------------|---------------|---------------|-------------------------------------|----------|------------------|-------------|
|                                                        |             |               |               | coupled receptor                    |          |                  |             |
| Melanocortin receptor 4                                | MC4R        | P32245        | CHEMBL259     | Family A G protein-coupled receptor | 0.101614 | 21 / 0Â Â Â Â Â  | Cannabidiol |
| Serine/threonine-protein kinase Aurora-C               | AURKC       | Q9UQB9        | CHEMBL3935    | Kinase                              | 0.101614 | 9 / 0Â Â Â Â Â   | Cannabidiol |
| Serine/threonine-protein kinase/endoribonuclease IRE1  | ERN1        | O75460        | CHEMBL1163101 | Enzyme                              | 0.101614 | 3 / 0Â Â Â Â Â   | Cannabidiol |
| Beta secretase 2                                       | BACE2       | Q9Y5Z0        | CHEMBL2525    | Protease                            | 0.101614 | 46 / 0Â Â Â Â Â  | Cannabidiol |
| Pyruvate kinase isozymes M1/M2                         | PKM         | P14618        | CHEMBL1075189 | Enzyme                              | 0.101614 | 7 / 0Â Â Â Â Â   | Cannabidiol |
| Aldose reductase (by homology)                         | AKR1B1      | P15121        | CHEMBL1900    | Enzyme                              | 0.101614 | 7 / 0Â Â Â Â Â   | Cannabidiol |
| Interleukin-8 receptor B                               | CXCR2       | P25025        | CHEMBL2434    | Family A G protein-coupled receptor | 0.101614 | 47 / 0Â Â Â Â Â  | Cannabidiol |
| ATP-binding cassette sub-family G member 2             | ABCG2       | Q9UNQ0        | CHEMBL5393    | Primary active transporter          | 0.101614 | 14 / 0Â Â Â Â Â  | Cannabidiol |
| Cholecystokinin A receptor                             | CCKAR       | P32238        | CHEMBL1901    | Family A G protein-coupled receptor | 0        | 35 / 0Â Â Â Â Â  | Cannabidiol |
| Estradiol 17-beta-dehydrogenase 2                      | HSD17B2     | P37059        | CHEMBL2789    | Enzyme                              | 0        | 20 / 0Â Â Â Â Â  | Cannabidiol |
| Neuropeptide Y receptor type 5                         | NPY5R       | Q15761        | CHEMBL4561    | Family A G protein-coupled receptor | 0        | 139 / 0Â Â Â Â Â | Cannabidiol |
| Sodium channel protein type V alpha subunit            | SCN5A       | Q14524        | CHEMBL1980    | Voltage-gated ion channel           | 0        | 21 / 0Â Â Â Â Â  | Cannabidiol |
| Carbonic anhydrase II                                  | CA2         | P00918        | CHEMBL205     | Lyase                               | 0        | 98 / 0Â Â Â Â Â  | Cannabidiol |
| Acyl coenzyme A:cholesterol acyltransferase            | CES1        | P23141        | CHEMBL2265    | Enzyme                              | 0        | 24 / 0Â Â Â Â Â  | Cannabidiol |
| 6-phosphofructo-2-kinase/fructose-2,6-bisphosphatase 3 | PFKFB3      | Q16875        | CHEMBL2331053 | Enzyme                              | 0        | 65 / 0Â Â Â Â Â  | Cannabidiol |
| Carboxylesterase 2                                     | CES2        | O00748        | CHEMBL3180    | Enzyme                              | 0        | 5 / 0Â Â Â Â Â   | Cannabidiol |
| Carbonic anhydrase XII                                 | CA12        | O43570        | CHEMBL3242    | Lyase                               | 0        | 54 / 0Â Â Â Â Â  | Cannabidiol |
| Carbonic anhydrase IX                                  | CA9         | Q16790        | CHEMBL3594    | Lyase                               | 0        | 72 / 0Â Â Â Â Â  | Cannabidiol |
| Sodium channel protein type II alpha subunit           | SCN2A       | Q99250        | CHEMBL4187    | Voltage-gated ion channel           | 0        | 28 / 0Â Â Â Â Â  | Cannabidiol |
| Cyclin-dependent kinase 5/CDK5 activator 1             | CDK5R1 CDK5 | Q15078 Q00535 | CHEMBL1907600 | Kinase                              | 0        | 100 / 0Â Â Â Â Â | Cannabidiol |

|                                                     |                |                  |               |                                     |   |                     |             |
|-----------------------------------------------------|----------------|------------------|---------------|-------------------------------------|---|---------------------|-------------|
| Serine/threonine-protein kinase PLK1                | PLK1           | P53350           | CHEMBL3024    | Kinase                              | 0 | 15 /<br>0Â Â Â Â Â  | Cannabidiol |
| Integrin alpha2/beta1                               | ITGB1<br>ITGA2 | P05556<br>P17301 | CHEMBL3137268 | Unclassified protein                | 0 | 1 /<br>0Â Â Â Â Â   | Cannabidiol |
| Serine/threonine-protein kinase Aurora-A            | AURKA          | O14965           | CHEMBL4722    | Kinase                              | 0 | 31 /<br>0Â Â Â Â Â  | Cannabidiol |
| Monoamine oxidase B                                 | MAOB           | P27338           | CHEMBL2039    | Oxidoreductase                      | 0 | 158 /<br>0Â Â Â Â Â | Cannabidiol |
| Bromodomain-containing protein 1                    | BRD1           | O95696           | CHEMBL2176774 | Reader                              | 0 | 7 /<br>0Â Â Â Â Â   | Cannabidiol |
| P2X purinoceptor 3                                  | P2RX3          | P56373           | CHEMBL2998    | Ligand-gated ion channel            | 0 | 42 /<br>0Â Â Â Â Â  | Cannabidiol |
| Transcription intermediary factor 1-alpha           | TRIM24         | O15164           | CHEMBL3108638 | Reader                              | 0 | 10 /<br>0Â Â Â Â Â  | Cannabidiol |
| Peregrin                                            | BRPF1          | P55201           | CHEMBL3132741 | Reader                              | 0 | 25 /<br>0Â Â Â Â Â  | Cannabidiol |
| Nitric-oxide synthase, brain                        | NOS1           | P29475           | CHEMBL3568    | Enzyme                              | 0 | 37 /<br>0Â Â Â Â Â  | Cannabidiol |
| Calcium-activated potassium channel subunit alpha-1 | KCNMA1         | Q12791           | CHEMBL4304    | Voltage-gated ion channel           | 0 | 13 /<br>0Â Â Â Â Â  | Cannabidiol |
| Nitric-oxide synthase, endothelial                  | NOS3           | P29474           | CHEMBL4803    | Enzyme                              | 0 | 16 /<br>0Â Â Â Â Â  | Cannabidiol |
| Pyroglutamylated RFamide peptide receptor           | QRFR           | Q96P65           | CHEMBL5852    | Family A G protein-coupled receptor | 0 | 10 /<br>0Â Â Â Â Â  | Cannabidiol |
| Carnitine O-palmitoyltransferase 1, liver isoform   | CPT1A          | P50416           | CHEMBL1293194 | Enzyme                              | 0 | 38 /<br>0Â Â Â Â Â  | Cannabidiol |
| Tyrosine-protein kinase JAK3                        | JAK3           | P52333           | CHEMBL2148    | Kinase                              | 0 | 180 /<br>0Â Â Â Â Â | Cannabidiol |
| Tyrosine-protein kinase JAK2                        | JAK2           | O60674           | CHEMBL2971    | Kinase                              | 0 | 160 /<br>0Â Â Â Â Â | Cannabidiol |
| Bombesin receptor subtype-3                         | BRS3           | P32247           | CHEMBL4080    | Family A G protein-coupled receptor | 0 | 2 /<br>0Â Â Â Â Â   | Cannabidiol |
| Metabotropic glutamate receptor 5                   | GRM5           | P41594           | CHEMBL3227    | Family C G protein-coupled receptor | 0 | 279 /<br>0Â Â Â Â Â | Cannabidiol |
| Signal transducer and activator of transcription 3  | STAT3          | P40763           | CHEMBL4026    | Transcription factor                | 0 | 23 /<br>0Â Â Â Â Â  | Cannabidiol |
| Dopamine D1 receptor                                | DRD1           | P21728           | CHEMBL2056    | Family A G protein-coupled receptor | 0 | 24 /<br>0Â Â Â Â Â  | Cannabidiol |
| Adenosine A1 receptor                               | ADORA1         | P30542           | CHEMBL226     | Family A G protein-coupled receptor | 0 | 268 /<br>0Â Â Â Â Â | Cannabidiol |
| Adenosine A2a receptor                              | ADORA2A        | P29274           | CHEMBL251     | Family A G protein-                 | 0 | 162 /<br>0Â Â Â Â Â | Cannabidiol |

|                                                  |              |                  |               |                                     |          |                                                   |                |
|--------------------------------------------------|--------------|------------------|---------------|-------------------------------------|----------|---------------------------------------------------|----------------|
|                                                  |              |                  |               | coupled receptor                    |          |                                                   |                |
| Protein kinase C delta                           | PRKCD        | Q05655           | CHEMBL2996    | Kinase                              | 0        | $\frac{24}{0 \hat{A} \hat{A} \hat{A} \hat{A}}$    | Cannabidiol    |
| Tyrosine-protein kinase Lyn                      | LYN          | P07948           | CHEMBL3905    | Kinase                              | 0        | $\frac{5}{0 \hat{A} \hat{A} \hat{A} \hat{A}}$     | Cannabidiol    |
| Protein kinase C theta                           | PRKCQ        | Q04759           | CHEMBL3920    | Kinase                              | 0        | $\frac{39}{0 \hat{A} \hat{A} \hat{A} \hat{A}}$    | Cannabidiol    |
| Peroxisome proliferator-activated receptor alpha | PPARA        | Q07869           | CHEMBL239     | Nuclear receptor                    | 0        | $\frac{0}{13 \hat{A} \hat{A} \hat{A} \hat{A}}$    | Cannabidiol    |
| Interleukin-8 receptor A                         | CXCR1        | P25024           | CHEMBL4029    | Family A G protein-coupled receptor | 0        | $\frac{12}{0 \hat{A} \hat{A} \hat{A} \hat{A}}$    | Cannabidiol    |
| Anandamide amidohydrolase                        | FAAH         | O00519           | CHEMBL2243    | Enzyme                              | 0        | $\frac{96}{0 \hat{A} \hat{A} \hat{A} \hat{A}}$    | Cannabidiol    |
| Kinesin-like protein 1                           | KIF11        | P52732           | CHEMBL4581    | Other cytosolic protein             | 0        | $\frac{34}{0 \hat{A} \hat{A} \hat{A} \hat{A}}$    | Cannabidiol    |
| Phosphodiesterase 5A                             | PDE5A        | O76074           | CHEMBL1827    | Phosphodiesterase                   | 0        | $\frac{129}{0 \hat{A} \hat{A} \hat{A} \hat{A}}$   | Cannabidiol    |
| Melatonin receptor 1A                            | MTNR1A       | P48039           | CHEMBL1945    | Family A G protein-coupled receptor | 0        | $\frac{115}{0 \hat{A} \hat{A} \hat{A} \hat{A}}$   | Cannabidiol    |
| Protein farnesyltransferase                      | FNTA<br>FNTB | P49354<br>P49356 | CHEMBL2094108 | Enzyme                              | 0        | $\frac{169}{0 \hat{A} \hat{A} \hat{A} \hat{A}}$   | Cannabidiol    |
| G-protein coupled bile acid receptor 1           | GPBAR1       | Q8TDU6           | CHEMBL5409    | Family A G protein-coupled receptor | 0        | $\frac{24}{0 \hat{A} \hat{A} \hat{A} \hat{A}}$    | Cannabidiol    |
| Isocitrate dehydrogenase [NADP] cytoplasmic      | IDH1         | O75874           | CHEMBL2007625 | Enzyme                              | 0        | $\frac{213}{0 \hat{A} \hat{A} \hat{A} \hat{A}}$   | Cannabidiol    |
| Tyrosine-protein kinase SYK                      | SYK          | P43405           | CHEMBL2599    | Kinase                              | 0        | $\frac{37}{0 \hat{A} \hat{A} \hat{A} \hat{A}}$    | Cannabidiol    |
| Tyrosine-protein kinase JAK1                     | JAK1         | P23458           | CHEMBL2835    | Kinase                              | 0        | $\frac{72}{0 \hat{A} \hat{A} \hat{A} \hat{A}}$    | Cannabidiol    |
| JAK3/JAK1                                        | JAK3<br>JAK1 | P52333<br>P23458 | CHEMBL3038491 | Kinase                              | 0        | $\frac{15}{0 \hat{A} \hat{A} \hat{A} \hat{A}}$    | Cannabidiol    |
| Hormone sensitive lipase                         | LIPE         | Q05469           | CHEMBL3590    | Enzyme                              | 0        | $\frac{55}{0 \hat{A} \hat{A} \hat{A} \hat{A}}$    | Cannabidiol    |
|                                                  |              |                  |               |                                     |          |                                                   |                |
| Cannabinoid receptor 1                           | CNR1         | P21554           | CHEMBL218     | Family A G protein-coupled receptor | 0.897728 | $\frac{564}{210 \hat{A} \hat{A} \hat{A} \hat{A}}$ | Cannabidivarin |
| Cannabinoid receptor 2                           | CNR2         | P34972           | CHEMBL253     | Family A G protein-coupled receptor | 0.897728 | $\frac{439}{174 \hat{A} \hat{A} \hat{A} \hat{A}}$ | Cannabidivarin |
| G-protein coupled receptor 55                    | GPR55        | Q9Y2T6           | CHEMBL1075322 | Family A G protein-coupled receptor | 0.641391 | $\frac{9}{2 \hat{A} \hat{A} \hat{A} \hat{A}}$     | Cannabidivarin |
| Arachidonate 5-lipoxygenase                      | ALOX5        | P09917           | CHEMBL215     | Oxidoreductase                      | 0.097875 | $\frac{42}{19 \hat{A} \hat{A} \hat{A} \hat{A}}$   | Cannabidivarin |

|                                                     |        |        |               |                                     |          |          |                |
|-----------------------------------------------------|--------|--------|---------------|-------------------------------------|----------|----------|----------------|
| Cystic fibrosis transmembrane conductance regulator | CFTR   | P13569 | CHEMBL4051    | Other ion channel                   | 0.097875 | 9 / 0    | Cannabidivarin |
| Melanocortin receptor 4                             | MC4R   | P32245 | CHEMBL259     | Family A G protein-coupled receptor | 0.097875 | 16 / 0   | Cannabidivarin |
| Poly [ADP-ribose] polymerase-1                      | PARP1  | P09874 | CHEMBL3105    | Enzyme                              | 0.097875 | 18 / 0   | Cannabidivarin |
| Receptor protein-tyrosine kinase erbB-2             | ERBB2  | P04626 | CHEMBL1824    | Kinase                              | 0.097875 | 44 / 0   | Cannabidivarin |
| DNA polymerase beta (by homology)                   | POLB   | P06746 | CHEMBL2392    | Enzyme                              | 0.097875 | 0 / 3    | Cannabidivarin |
| Arachidonate 15-lipoxygenase                        | ALOX15 | P16050 | CHEMBL2903    | Enzyme                              | 0.097875 | 19 / 11  | Cannabidivarin |
| Calcium sensing receptor                            | CASR   | P41180 | CHEMBL1878    | Family C G protein-coupled receptor | 0.097875 | 33 / 0   | Cannabidivarin |
| Histone deacetylase 6                               | HDAC6  | Q9UBN7 | CHEMBL1865    | Eraser                              | 0.097875 | 20 / 0   | Cannabidivarin |
| Histone deacetylase 8                               | HDAC8  | Q9BY41 | CHEMBL3192    | Eraser                              | 0.097875 | 12 / 0   | Cannabidivarin |
| NAD-dependent deacetylase sirtuin 2                 | SIRT2  | Q8IXJ6 | CHEMBL4462    | Eraser                              | 0.097875 | 21 / 0   | Cannabidivarin |
| Serotonin 2b (5-HT2b) receptor                      | HTR2B  | P41595 | CHEMBL1833    | Family A G protein-coupled receptor | 0.097875 | 38 / 0   | Cannabidivarin |
| Glucagon receptor                                   | GCGR   | P47871 | CHEMBL1985    | Family B G protein-coupled receptor | 0.097875 | 26 / 0   | Cannabidivarin |
| Prenyl protein specific protease                    | RCE1   | Q9Y256 | CHEMBL3411    | Protease                            | 0.097875 | 6 / 0    | Cannabidivarin |
| Vascular endothelial growth factor receptor 2       | KDR    | P35968 | CHEMBL279     | Kinase                              | 0.097875 | 214 / 12 | Cannabidivarin |
| N-arachidonyl glycine receptor                      | GPR18  | Q14330 | CHEMBL2384898 | Family A G protein-coupled receptor | 0.097875 | 2 / 2    | Cannabidivarin |
| Glycine receptor subunit alpha-1                    | GLRA1  | P23415 | CHEMBL5845    | Ligand-gated ion channel            | 0.097875 | 1 / 1    | Cannabidivarin |
| Phosphodiesterase 4B                                | PDE4B  | Q07343 | CHEMBL275     | Phosphodiesterase                   | 0.097875 | 21 / 0   | Cannabidivarin |
| Cyclooxygenase-2                                    | PTGS2  | P35354 | CHEMBL230     | Oxidoreductase                      | 0.097875 | 120 / 3  | Cannabidivarin |
| Epoxide hydratase                                   | EPHX2  | P34913 | CHEMBL2409    | Protease                            | 0.097875 | 64 / 0   | Cannabidivarin |
| L-lactate dehydrogenase A chain                     | LDHA   | P00338 | CHEMBL4835    | Enzyme                              | 0.097875 | 7 / 0    | Cannabidivarin |
| Cathepsin D                                         | CTSD   | P07339 | CHEMBL2581    | Protease                            | 0.097875 | 22 / 0   | Cannabidivarin |

|                                                       |                |                  |               |                                     |          |                     |                |
|-------------------------------------------------------|----------------|------------------|---------------|-------------------------------------|----------|---------------------|----------------|
| Beta-secretase 1                                      | BACE1          | P56817           | CHEMBL4822    | Protease                            | 0.097875 | 160 /<br>0Â Â Â Â Â | Cannabidivarin |
| Cholesteryl ester transfer protein                    | CETP           | P11597           | CHEMBL3572    | Other ion channel                   | 0.097875 | 5 /<br>2Â Â Â Â Â   | Cannabidivarin |
| Tyrosine-protein kinase JAK2                          | JAK2           | O60674           | CHEMBL2971    | Kinase                              | 0.097875 | 169 /<br>0Â Â Â Â Â | Cannabidivarin |
| Monoglyceride lipase                                  | MGLL           | Q99685           | CHEMBL4191    | Enzyme                              | 0.097875 | 8 /<br>0Â Â Â Â Â   | Cannabidivarin |
| Quinone reductase 2                                   | NQO2           | P16083           | CHEMBL3959    | Enzyme                              | 0.097875 | 8 /<br>0Â Â Â Â Â   | Cannabidivarin |
| Thymidylate synthase                                  | TYMS           | P04818           | CHEMBL1952    | Transferase                         | 0.097875 | 25 /<br>0Â Â Â Â Â  | Cannabidivarin |
| Interleukin-8 receptor B                              | CXCR2          | P25025           | CHEMBL2434    | Family A G protein-coupled receptor | 0.097875 | 38 /<br>0Â Â Â Â Â  | Cannabidivarin |
| Serine/threonine-protein kinase PAK 1                 | PAK1           | Q13153           | CHEMBL4600    | Kinase                              | 0.097875 | 1 /<br>0Â Â Â Â Â   | Cannabidivarin |
| Cyclin-dependent kinase 5/CDK5 activator 1            | CDK5R1<br>CDK5 | Q15078<br>Q00535 | CHEMBL1907600 | Kinase                              | 0.097875 | 99 /<br>0Â Â Â Â Â  | Cannabidivarin |
| Serine/threonine-protein kinase Aurora-C              | AURKC          | Q9UQB<br>9       | CHEMBL3935    | Kinase                              | 0.097875 | 11 /<br>0Â Â Â Â Â  | Cannabidivarin |
| Serine/threonine-protein kinase Aurora-A              | AURKA          | O14965           | CHEMBL4722    | Kinase                              | 0.097875 | 26 /<br>0Â Â Â Â Â  | Cannabidivarin |
| p53-binding protein Mdm-2                             | MDM2           | Q00987           | CHEMBL5023    | Other nuclear protein               | 0.097875 | 42 /<br>0Â Â Â Â Â  | Cannabidivarin |
| Translocator protein (by homology)                    | TSPO           | P30536           | CHEMBL5742    | Membrane receptor                   | 0.097875 | 279 /<br>0Â Â Â Â Â | Cannabidivarin |
| 11-beta-hydroxysteroid dehydrogenase 1                | HSD11B<br>1    | P28845           | CHEMBL4235    | Enzyme                              | 0.097875 | 208 /<br>0Â Â Â Â Â | Cannabidivarin |
| Serine/threonine-protein kinase/endoribonuclease IRE1 | ERN1           | O75460           | CHEMBL1163101 | Enzyme                              | 0.097875 | 3 /<br>0Â Â Â Â Â   | Cannabidivarin |
| Estradiol 17-beta-dehydrogenase 3                     | HSD17B<br>3    | P37058           | CHEMBL4234    | Enzyme                              | 0.097875 | 4 /<br>0Â Â Â Â Â   | Cannabidivarin |
| Calcium-activated potassium channel subunit alpha-1   | KCNMA<br>1     | Q12791           | CHEMBL4304    | Voltage-gated ion channel           | 0.097875 | 12 /<br>0Â Â Â Â Â  | Cannabidivarin |
| Anandamide amidohydrolase                             | FAAH           | O00519           | CHEMBL2243    | Enzyme                              | 0.097875 | 32 /<br>0Â Â Â Â Â  | Cannabidivarin |
| Steryl-sulfatase                                      | STS            | P08842           | CHEMBL3559    | Enzyme                              | 0.097875 | 9 /<br>0Â Â Â Â Â   | Cannabidivarin |
| Estradiol 17-beta-dehydrogenase 2                     | HSD17B<br>2    | P37059           | CHEMBL2789    | Enzyme                              | 0.097875 | 12 /<br>0Â Â Â Â Â  | Cannabidivarin |
| Cholecystokinin B receptor (by homology)              | CCKBR          | P32239           | CHEMBL298     | Family A G protein-coupled receptor | 0.097875 | 183 /<br>0Â Â Â Â Â | Cannabidivarin |
| Protein kinase C delta                                | PRKCD          | Q05655           | CHEMBL2996    | Kinase                              | 0.097875 | 18 /<br>0Â Â Â Â Â  | Cannabidivarin |
| Tyrosine-protein kinase Lyn                           | LYN            | P07948           | CHEMBL3905    | Kinase                              | 0.097875 | 4 /<br>0Â Â Â Â Â   | Cannabidivarin |



|                                                  |         |        |               |                                     |          |         |                |
|--------------------------------------------------|---------|--------|---------------|-------------------------------------|----------|---------|----------------|
| Protein kinase C theta                           | PRKCQ   | Q04759 | CHEMBL3920    | Kinase                              | 0.097875 | 33 / 0  | Cannabidivarin |
| Macrophage migration inhibitory factor           | MIF     | P14174 | CHEMBL2085    | Enzyme                              | 0.097875 | 3 / 0   | Cannabidivarin |
| ADAMTS5                                          | ADAMTS5 | Q9UNA0 | CHEMBL2285    | Protease                            | 0.097875 | 20 / 0  | Cannabidivarin |
| Nitric-oxide synthase, brain                     | NOS1    | P29475 | CHEMBL3568    | Enzyme                              | 0.097875 | 51 / 0  | Cannabidivarin |
| Nitric-oxide synthase, endothelial               | NOS3    | P29474 | CHEMBL4803    | Enzyme                              | 0.097875 | 20 / 0  | Cannabidivarin |
| Metabotropic glutamate receptor 2                | GRM2    | Q14416 | CHEMBL5137    | Family C G protein-coupled receptor | 0.097875 | 21 / 0  | Cannabidivarin |
| Bromodomain-containing protein 1                 | BRD1    | O95696 | CHEMBL2176774 | Reader                              | 0        | 6 / 0   | Cannabidivarin |
| Transcription intermediary factor 1-alpha        | TRIM24  | O15164 | CHEMBL3108638 | Reader                              | 0        | 9 / 0   | Cannabidivarin |
| Peregrin                                         | BRPF1   | P55201 | CHEMBL3132741 | Reader                              | 0        | 21 / 0  | Cannabidivarin |
| LDL-associated phospholipase A2                  | PLA2G7  | Q13093 | CHEMBL3514    | Enzyme                              | 0        | 16 / 0  | Cannabidivarin |
| Mitogen-activated protein kinase kinase kinase 8 | MAP3K8  | P41279 | CHEMBL4899    | Kinase                              | 0        | 37 / 0  | Cannabidivarin |
| Adenosine A1 receptor                            | ADORA1  | P30542 | CHEMBL226     | Family A G protein-coupled receptor | 0        | 202 / 0 | Cannabidivarin |
| Adenosine A2a receptor                           | ADORA2A | P29274 | CHEMBL251     | Family A G protein-coupled receptor | 0        | 110 / 0 | Cannabidivarin |
| Prostanoid EP1 receptor                          | PTGER1  | P34995 | CHEMBL1811    | Family A G protein-coupled receptor | 0        | 22 / 0  | Cannabidivarin |
| Melatonin receptor 1B                            | MTNR1B  | P49286 | CHEMBL1946    | Family A G protein-coupled receptor | 0        | 49 / 0  | Cannabidivarin |
| MAP kinase p38 alpha                             | MAPK14  | Q16539 | CHEMBL260     | Kinase                              | 0        | 279 / 0 | Cannabidivarin |
| Monoamine oxidase B                              | MAOB    | P27338 | CHEMBL2039    | Oxidoreductase                      | 0        | 128 / 0 | Cannabidivarin |
| Egl nine homolog 1                               | EGLN1   | Q9GZT9 | CHEMBL5697    | Oxidoreductase                      | 0        | 9 / 0   | Cannabidivarin |
| Glycogen synthase kinase-3 beta                  | GSK3B   | P49841 | CHEMBL262     | Kinase                              | 0        | 47 / 0  | Cannabidivarin |
| Sodium channel protein type II alpha subunit     | SCN2A   | Q99250 | CHEMBL4187    | Voltage-gated ion channel           | 0        | 22 / 0  | Cannabidivarin |
| Voltage-gated potassium channel subunit Kv1.5    | KCNA5   | P22460 | CHEMBL4306    | Voltage-gated ion channel           | 0        | 93 / 0  | Cannabidivarin |

|                                                                             |                                 |                                      |               |                                     |   |         |                |
|-----------------------------------------------------------------------------|---------------------------------|--------------------------------------|---------------|-------------------------------------|---|---------|----------------|
| Isocitrate dehydrogenase [NADP] cytoplasmic                                 | IDH1                            | O75874                               | CHEMBL2007625 | Enzyme                              | 0 | 191 / 0 | Cannabidivarin |
| Cyclin-dependent kinase 1/cyclin B                                          | CCNB3<br>CDK1<br>CCNB1<br>CCNB2 | Q8WWL7<br>P06493<br>P14635<br>O95067 | CHEMBL2094127 | Other cytosolic protein             | 0 | 42 / 0  | Cannabidivarin |
| Cathepsin K                                                                 | CTSK                            | P43235                               | CHEMBL268     | Protease                            | 0 | 107 / 2 | Cannabidivarin |
| Peroxisome proliferator-activated receptor alpha                            | PPARA                           | Q07869                               | CHEMBL239     | Nuclear receptor                    | 0 | 0 / 13  | Cannabidivarin |
| Dopamine D1 receptor                                                        | DRD1                            | P21728                               | CHEMBL2056    | Family A G protein-coupled receptor | 0 | 19 / 0  | Cannabidivarin |
| Protein farnesyltransferase                                                 | FNTA<br>FNTB                    | P49354<br>P49356                     | CHEMBL2094108 | Enzyme                              | 0 | 128 / 0 | Cannabidivarin |
| Tyrosine-protein kinase JAK3                                                | JAK3                            | P52333                               | CHEMBL2148    | Kinase                              | 0 | 184 / 0 | Cannabidivarin |
| Bromodomain-containing protein 4                                            | BRD4                            | O60885                               | CHEMBL1163125 | Reader                              | 0 | 38 / 0  | Cannabidivarin |
| Gonadotropin-releasing hormone receptor                                     | GNRHR                           | P30968                               | CHEMBL1855    | Family A G protein-coupled receptor | 0 | 6 / 0   | Cannabidivarin |
| Kinesin-1 heavy chain/ Tyrosine-protein kinase receptor RET                 | RET                             | P07949                               | CHEMBL2041    | Kinase                              | 0 | 12 / 0  | Cannabidivarin |
| Adenosine A2b receptor                                                      | ADORA2B                         | P29275                               | CHEMBL255     | Family A G protein-coupled receptor | 0 | 27 / 0  | Cannabidivarin |
| Serine/threonine-protein kinase RIPK2                                       | RIPK2                           | O43353                               | CHEMBL5014    | Kinase                              | 0 | 5 / 0   | Cannabidivarin |
| Dual-specificity tyrosine-phosphorylation regulated kinase 1A (by homology) | DYRK1A                          | Q13627                               | CHEMBL2292    | Kinase                              | 0 | 44 / 0  | Cannabidivarin |
| Beta secretase 2                                                            | BACE2                           | Q9Y5Z0                               | CHEMBL2525    | Protease                            | 0 | 38 / 0  | Cannabidivarin |
| Sodium channel protein type V alpha subunit                                 | SCN5A                           | Q14524                               | CHEMBL1980    | Voltage-gated ion channel           | 0 | 17 / 0  | Cannabidivarin |
| Serine/threonine-protein kinase 33                                          | STK33                           | Q9BYT3                               | CHEMBL6005    | Kinase                              | 0 | 17 / 0  | Cannabidivarin |
| Corticotropin releasing factor receptor 1                                   | CRHR1                           | P34998                               | CHEMBL1800    | Family B G protein-coupled receptor | 0 | 67 / 0  | Cannabidivarin |
| Cholecystokinin A receptor                                                  | CCKAR                           | P32238                               | CHEMBL1901    | Family A G protein-coupled receptor | 0 | 16 / 0  | Cannabidivarin |
| Pyruvate kinase isozymes M1/M2                                              | PKM                             | P14618                               | CHEMBL1075189 | Enzyme                              | 0 | 6 / 0   | Cannabidivarin |

|                                                        |                                                     |                                                          |               |                                     |          |                    |                |
|--------------------------------------------------------|-----------------------------------------------------|----------------------------------------------------------|---------------|-------------------------------------|----------|--------------------|----------------|
| Melatonin receptor 1A                                  | MTNR1A                                              | P48039                                                   | CHEMBL1945    | Family A G protein-coupled receptor | 0        | 69 / 0Â Â Â Â Â    | Cannabidivarin |
| Tyrosine-protein kinase JAK1                           | JAK1                                                | P23458                                                   | CHEMBL2835    | Kinase                              | 0        | 66 / 0Â Â Â Â Â    | Cannabidivarin |
| JAK3/JAK1                                              | JAK3<br>JAK1                                        | P52333<br>P23458                                         | CHEMBL3038491 | Kinase                              | 0        | 13 / 0Â Â Â Â Â    | Cannabidivarin |
| L-lactate dehydrogenase B chain                        | LDHB                                                | P07195                                                   | CHEMBL4940    | Enzyme                              | 0        | 2 / 0Â Â Â Â Â     | Cannabidivarin |
| Myosin light chain kinase, smooth muscle               | MYLK                                                | Q15746                                                   | CHEMBL2428    | Kinase                              | 0        | 3 / 0Â Â Â Â Â     | Cannabidivarin |
| Cyclin-dependent kinase 2                              | CDK2                                                | P24941                                                   | CHEMBL301     | Kinase                              | 0        | 45 / 0Â Â Â Â Â    | Cannabidivarin |
| Cyclin-dependent kinase 4                              | CDK4                                                | P11802                                                   | CHEMBL331     | Kinase                              | 0        | 20 / 0Â Â Â Â Â    | Cannabidivarin |
| Nischarin                                              | NISCH                                               | Q9Y211                                                   | CHEMBL3923    | Other cytosolic protein             | 0        | 38 / 0Â Â Â Â Â    | Cannabidivarin |
| Glutaminyl-peptide cyclotransferase                    | QPCT                                                | Q16769                                                   | CHEMBL4508    | Enzyme                              | 0        | 26 / 0Â Â Â Â Â    | Cannabidivarin |
| Matrix metalloproteinase 9                             | MMP9                                                | P14780                                                   | CHEMBL321     | Protease                            | 0        | 19 / 0Â Â Â Â Â    | Cannabidivarin |
| Matrix metalloproteinase 2                             | MMP2                                                | P08253                                                   | CHEMBL333     | Protease                            | 0        | 23 / 0Â Â Â Â Â    | Cannabidivarin |
| GABA receptor alpha-1 subunit (by homology)            | GABRA1                                              | P14867                                                   | CHEMBL1962    | Ligand-gated ion channel            | 0        | 8 / 0Â Â Â Â Â     | Cannabidivarin |
|                                                        |                                                     |                                                          |               |                                     |          |                    |                |
| Cannabinoid receptor 1                                 | CNR1                                                | P21554                                                   | CHEMBL218     | Family A G protein-coupled receptor | 0.241979 | 432 / 344Â Â Â Â Â | Cannabielsoin  |
| Cannabinoid receptor 2                                 | CNR2                                                | P34972                                                   | CHEMBL253     | Family A G protein-coupled receptor | 0.241979 | 425 / 329Â Â Â Â Â | Cannabielsoin  |
| Vascular endothelial growth factor receptor 2          | KDR                                                 | P35968                                                   | CHEMBL279     | Kinase                              | 0.112748 | 414 / 10Â Â Â Â Â  | Cannabielsoin  |
| 6-phosphofructo-2-kinase/fructose-2,6-bisphosphatase 3 | PFKFB3                                              | Q16875                                                   | CHEMBL2331053 | Enzyme                              | 0.104672 | 138 / 0Â Â Â Â Â   | Cannabielsoin  |
| Glucagon receptor                                      | GCGR                                                | P47871                                                   | CHEMBL1985    | Family B G protein-coupled receptor | 0.104672 | 13 / 0Â Â Â Â Â    | Cannabielsoin  |
| Gamma-secretase                                        | PSEN2<br>PSENEN<br>NCSTN<br>APH1A<br>PSEN1<br>APH1B | P49810<br>Q9NZ42<br>Q92542<br>Q96BI3<br>P49768<br>Q8WW43 | CHEMBL2094135 | Protease                            | 0.104672 | 208 / 0Â Â Â Â Â   | Cannabielsoin  |
| Lysosomal Pro-X carboxypeptidase                       | PRCP                                                | P42785                                                   | CHEMBL2335    | Protease                            | 0.104672 | 28 / 0Â Â Â Â Â    | Cannabielsoin  |

|                                                  |         |        |               |                                     |          |                                                 |               |
|--------------------------------------------------|---------|--------|---------------|-------------------------------------|----------|-------------------------------------------------|---------------|
| Mixed lineage kinase 7                           | MAP3K20 | Q9NYL2 | CHEMBL3886    | Kinase                              | 0.104672 | $\frac{6}{0 \hat{A} \hat{A} \hat{A} \hat{A}}$   | Cannabielsoin |
| TGF-beta receptor type II                        | TGFBR2  | P37173 | CHEMBL4267    | Kinase                              | 0.104672 | $\frac{4}{0 \hat{A} \hat{A} \hat{A} \hat{A}}$   | Cannabielsoin |
| TGF-beta receptor type I                         | TGFBR1  | P36897 | CHEMBL4439    | Kinase                              | 0.104672 | $\frac{21}{0 \hat{A} \hat{A} \hat{A} \hat{A}}$  | Cannabielsoin |
| Serine/threonine-protein kinase Aurora-B         | AURKB   | Q96GD4 | CHEMBL2185    | Kinase                              | 0.104672 | $\frac{137}{0 \hat{A} \hat{A} \hat{A} \hat{A}}$ | Cannabielsoin |
| Cyclin-dependent kinase 1                        | CDK1    | P06493 | CHEMBL308     | Kinase                              | 0.104672 | $\frac{179}{0 \hat{A} \hat{A} \hat{A} \hat{A}}$ | Cannabielsoin |
| Serine/threonine-protein kinase Aurora-A         | AURKA   | O14965 | CHEMBL4722    | Kinase                              | 0.104672 | $\frac{200}{0 \hat{A} \hat{A} \hat{A} \hat{A}}$ | Cannabielsoin |
| Phosphodiesterase 2A                             | PDE2A   | O00408 | CHEMBL2652    | Phosphodiesterase                   | 0.104672 | $\frac{109}{0 \hat{A} \hat{A} \hat{A} \hat{A}}$ | Cannabielsoin |
| Cyclin-dependent kinase 2                        | CDK2    | P24941 | CHEMBL301     | Kinase                              | 0.104672 | $\frac{175}{0 \hat{A} \hat{A} \hat{A} \hat{A}}$ | Cannabielsoin |
| Phosphodiesterase 10A                            | PDE10A  | Q9Y233 | CHEMBL4409    | Phosphodiesterase                   | 0.104672 | $\frac{605}{0 \hat{A} \hat{A} \hat{A} \hat{A}}$ | Cannabielsoin |
| Protein kinase C alpha                           | PRKCA   | P17252 | CHEMBL299     | Kinase                              | 0.104672 | $\frac{107}{0 \hat{A} \hat{A} \hat{A} \hat{A}}$ | Cannabielsoin |
| Interleukin-6 receptor subunit beta              | IL6ST   | P40189 | CHEMBL3124734 | Membrane receptor                   | 0.104672 | $\frac{6}{0 \hat{A} \hat{A} \hat{A} \hat{A}}$   | Cannabielsoin |
| Tyrosine-protein kinase SYK                      | SYK     | P43405 | CHEMBL2599    | Kinase                              | 0.104672 | $\frac{212}{0 \hat{A} \hat{A} \hat{A} \hat{A}}$ | Cannabielsoin |
| Adenosine A2a receptor                           | ADORA2A | P29274 | CHEMBL251     | Family A G protein-coupled receptor | 0.104672 | $\frac{186}{0 \hat{A} \hat{A} \hat{A} \hat{A}}$ | Cannabielsoin |
| Period circadian protein homolog 2               | PER2    | O15055 | CHEMBL3751648 | Unclassified protein                | 0.104672 | $\frac{40}{0 \hat{A} \hat{A} \hat{A} \hat{A}}$  | Cannabielsoin |
| Toll-like receptor 4                             | TLR4    | O00206 | CHEMBL5255    | Toll-like and Il-1 receptors        | 0.104672 | $\frac{4}{0 \hat{A} \hat{A} \hat{A} \hat{A}}$   | Cannabielsoin |
| DNA topoisomerase I (by homology)                | TOP1    | P11387 | CHEMBL1781    | Isomerase                           | 0.104672 | $\frac{12}{0 \hat{A} \hat{A} \hat{A} \hat{A}}$  | Cannabielsoin |
| C-C chemokine receptor type 1                    | CCR1    | P32246 | CHEMBL2413    | Family A G protein-coupled receptor | 0.104672 | $\frac{247}{0 \hat{A} \hat{A} \hat{A} \hat{A}}$ | Cannabielsoin |
| PI3-kinase p110-alpha subunit                    | PIK3CA  | P42336 | CHEMBL4005    | Enzyme                              | 0.104672 | $\frac{552}{0 \hat{A} \hat{A} \hat{A} \hat{A}}$ | Cannabielsoin |
| Serine-protein kinase ATR                        | ATR     | Q13535 | CHEMBL5024    | Kinase                              | 0.104672 | $\frac{29}{0 \hat{A} \hat{A} \hat{A} \hat{A}}$  | Cannabielsoin |
| 11-beta-hydroxysteroid dehydrogenase 1           | HSD11B1 | P28845 | CHEMBL4235    | Enzyme                              | 0.104672 | $\frac{314}{0 \hat{A} \hat{A} \hat{A} \hat{A}}$ | Cannabielsoin |
| Leukocyte elastase                               | ELANE   | P08246 | CHEMBL248     | Protease                            | 0.104672 | $\frac{36}{0 \hat{A} \hat{A} \hat{A} \hat{A}}$  | Cannabielsoin |
| Mitogen-activated protein kinase kinase kinase 5 | MAP3K5  | Q99683 | CHEMBL5285    | Kinase                              | 0.104672 | $\frac{16}{0 \hat{A} \hat{A} \hat{A} \hat{A}}$  | Cannabielsoin |
| Thrombin and coagulation factor X                | F10     | P00742 | CHEMBL244     | Protease                            | 0.104672 | $\frac{226}{0 \hat{A} \hat{A} \hat{A} \hat{A}}$ | Cannabielsoin |
| Tyrosine-protein kinase receptor FLT3            | FLT3    | P36888 | CHEMBL1974    | Kinase                              | 0.104672 | $\frac{106}{0 \hat{A} \hat{A} \hat{A} \hat{A}}$ | Cannabielsoin |
| Tyrosine-protein kinase YES                      | YES1    | P07947 | CHEMBL2073    | Kinase                              | 0.104672 | $\frac{16}{0 \hat{A} \hat{A} \hat{A} \hat{A}}$  | Cannabielsoin |

|                                                   |        |        |               |                                     |          |                  |               |
|---------------------------------------------------|--------|--------|---------------|-------------------------------------|----------|------------------|---------------|
| Potassium channel subfamily K member 3            | KCNK3  | O14649 | CHEMBL2321613 | Voltage-gated ion channel           | 0.104672 | 25 / 0Â Â Â Â Â  | Cannabielsoin |
| Phosphodiesterase 3                               | PDE3A  | Q14432 | CHEMBL241     | Phosphodiesterase                   | 0.104672 | 20 / 0Â Â Â Â Â  | Cannabielsoin |
| Tyrosine-protein kinase LCK                       | LCK    | P06239 | CHEMBL258     | Kinase                              | 0.104672 | 75 / 0Â Â Â Â Â  | Cannabielsoin |
| Phosphodiesterase 7A                              | PDE7A  | Q13946 | CHEMBL3012    | Phosphodiesterase                   | 0.104672 | 36 / 0Â Â Â Â Â  | Cannabielsoin |
| Tyrosine-protein kinase HCK                       | HCK    | P08631 | CHEMBL3234    | Kinase                              | 0.104672 | 27 / 0Â Â Â Â Â  | Cannabielsoin |
| Tyrosine-protein kinase Lyn                       | LYN    | P07948 | CHEMBL3905    | Kinase                              | 0.104672 | 19 / 0Â Â Â Â Â  | Cannabielsoin |
| Tyrosine-protein kinase FGR                       | FGR    | P09769 | CHEMBL4454    | Kinase                              | 0.104672 | 9 / 0Â Â Â Â Â   | Cannabielsoin |
| Ephrin type-A receptor 3                          | EPHA3  | P29320 | CHEMBL4954    | Kinase                              | 0.104672 | 6 / 0Â Â Â Â Â   | Cannabielsoin |
| Discoidin domain-containing receptor 2            | DDR2   | Q16832 | CHEMBL5122    | Kinase                              | 0.104672 | 7 / 0Â Â Â Â Â   | Cannabielsoin |
| Tyrosine-protein kinase BTK                       | BTK    | Q06187 | CHEMBL5251    | Kinase                              | 0.104672 | 42 / 0Â Â Â Â Â  | Cannabielsoin |
| Epithelial discoidin domain-containing receptor 1 | DDR1   | Q08345 | CHEMBL5319    | Kinase                              | 0.104672 | 10 / 0Â Â Â Â Â  | Cannabielsoin |
| N-arachidonyl glycine receptor                    | GPR18  | Q14330 | CHEMBL2384898 | Family A G protein-coupled receptor | 0.104672 | 0 / 2Â Â Â Â Â   | Cannabielsoin |
| Vasopressin V1a receptor                          | AVPR1A | P37288 | CHEMBL1889    | Family A G protein-coupled receptor | 0.104672 | 49 / 0Â Â Â Â Â  | Cannabielsoin |
| Lymphocyte differentiation antigen CD38           | CD38   | P28907 | CHEMBL4660    | Enzyme                              | 0.104672 | 16 / 0Â Â Â Â Â  | Cannabielsoin |
| Tyrosine-protein kinase FYN                       | FYN    | P06241 | CHEMBL1841    | Kinase                              | 0.104672 | 19 / 0Â Â Â Â Â  | Cannabielsoin |
| Cholecystokinin A receptor                        | CCKAR  | P32238 | CHEMBL1901    | Family A G protein-coupled receptor | 0.104672 | 21 / 0Â Â Â Â Â  | Cannabielsoin |
| P2X purinoceptor 7                                | P2RX7  | Q99572 | CHEMBL4805    | Ligand-gated ion channel            | 0.104672 | 37 / 0Â Â Â Â Â  | Cannabielsoin |
| Epoxide hydratase                                 | EPHX2  | P34913 | CHEMBL2409    | Protease                            | 0.104672 | 102 / 0Â Â Â Â Â | Cannabielsoin |
| Protein kinase C delta                            | PRKCD  | Q05655 | CHEMBL2996    | Kinase                              | 0.104672 | 90 / 0Â Â Â Â Â  | Cannabielsoin |
| C-C chemokine receptor type 8                     | CCR8   | P51685 | CHEMBL4596    | Family A G protein-coupled receptor | 0.104672 | 5 / 0Â Â Â Â Â   | Cannabielsoin |
| DNA-dependent protein kinase                      | PRKDC  | P78527 | CHEMBL3142    | Kinase                              | 0.104672 | 142 / 0Â Â Â Â Â | Cannabielsoin |
| PI3-kinase p110-beta subunit                      | PIK3CB | P42338 | CHEMBL3145    | Enzyme                              | 0.104672 | 265 / 0Â Â Â Â Â | Cannabielsoin |
| Cathepsin D                                       | CTSD   | P07339 | CHEMBL2581    | Protease                            | 0.104672 | 267 / 0Â Â Â Â Â | Cannabielsoin |

|                                                                    |                    |                  |               |                                     |          |                     |               |
|--------------------------------------------------------------------|--------------------|------------------|---------------|-------------------------------------|----------|---------------------|---------------|
| Delta opioid receptor                                              | OPRD1              | P41143           | CHEMBL236     | Family A G protein-coupled receptor | 0.104672 | 474 / 227 Å Å Å Å Å | Cannabielsoin |
| Orexin receptor 1                                                  | HCRTR1             | O43613           | CHEMBL5113    | Family A G protein-coupled receptor | 0.104672 | 40 / 0 Å Å Å Å Å    | Cannabielsoin |
| Leucine-rich repeat serine/threonine-protein kinase 2              | LRRK2              | Q5S007           | CHEMBL1075104 | Kinase                              | 0.104672 | 140 / 0 Å Å Å Å Å   | Cannabielsoin |
| Corticotropin releasing factor receptor 1                          | CRHR1              | P34998           | CHEMBL1800    | Family B G protein-coupled receptor | 0.104672 | 82 / 0 Å Å Å Å Å    | Cannabielsoin |
| Protein kinase C theta                                             | PRKCQ              | Q04759           | CHEMBL3920    | Kinase                              | 0.104672 | 51 / 0 Å Å Å Å Å    | Cannabielsoin |
| Transient receptor potential cation channel subfamily A member 1   | TRPA1              | O75762           | CHEMBL6007    | Voltage-gated ion channel           | 0.104672 | 14 / 0 Å Å Å Å Å    | Cannabielsoin |
| Tyrosine-protein kinase ABL                                        | ABL1               | P00519           | CHEMBL1862    | Kinase                              | 0.104672 | 85 / 0 Å Å Å Å Å    | Cannabielsoin |
| Platelet-derived growth factor receptor                            | PDGFR A<br>PDGFR B | P16234<br>P09619 | CHEMBL2095189 | Kinase                              | 0.104672 | 9 / 0 Å Å Å Å Å     | Cannabielsoin |
| Tyrosine-protein kinase JAK3                                       | JAK3               | P52333           | CHEMBL2148    | Kinase                              | 0.104672 | 199 / 0 Å Å Å Å Å   | Cannabielsoin |
| Tyrosine-protein kinase JAK2                                       | JAK2               | O60674           | CHEMBL2971    | Kinase                              | 0.104672 | 253 / 0 Å Å Å Å Å   | Cannabielsoin |
| P2X purinoceptor 3                                                 | P2RX3              | P56373           | CHEMBL2998    | Ligand-gated ion channel            | 0.104672 | 355 / 0 Å Å Å Å Å   | Cannabielsoin |
| Phosphodiesterase 1B                                               | PDE1B              | Q01064           | CHEMBL4425    | Phosphodiesterase                   | 0.104672 | 3 / 0 Å Å Å Å Å     | Cannabielsoin |
| Proto-oncogene tyrosine-protein kinase ROS                         | ROS1               | P08922           | CHEMBL5568    | Kinase                              | 0.104672 | 18 / 0 Å Å Å Å Å    | Cannabielsoin |
| Oxytocin receptor                                                  | OXTR               | P30559           | CHEMBL2049    | Family A G protein-coupled receptor | 0.104672 | 76 / 0 Å Å Å Å Å    | Cannabielsoin |
| Cytochrome P450 2C9                                                | CYP2C9             | P11712           | CHEMBL3397    | Cytochrome P450                     | 0.104672 | 7 / 0 Å Å Å Å Å     | Cannabielsoin |
| Cytochrome P450 3A4                                                | CYP3A4             | P08684           | CHEMBL340     | Cytochrome P450                     | 0.104672 | 5 / 0 Å Å Å Å Å     | Cannabielsoin |
| Polyadenylate-binding protein 1                                    | PABPC1             | P11940           | CHEMBL1293286 | Unclassified protein                | 0.104672 | 14 / 0 Å Å Å Å Å    | Cannabielsoin |
| Insulin-like growth factor I receptor                              | IGF1R              | P08069           | CHEMBL1957    | Kinase                              | 0.104672 | 159 / 0 Å Å Å Å Å   | Cannabielsoin |
| Insulin receptor                                                   | INSR               | P06213           | CHEMBL1981    | Kinase                              | 0.104672 | 29 / 0 Å Å Å Å Å    | Cannabielsoin |
| Histone deacetylase 3/Nuclear receptor corepressor 2 (HDAC3/NCoR2) | NCOR2<br>HDAC3     | Q9Y618<br>O15379 | CHEMBL2111363 | Eraser                              | 0.104672 | 14 / 0 Å Å Å Å Å    | Cannabielsoin |
| Tyrosine-protein kinase ITK/TSK                                    | ITK                | Q08881           | CHEMBL2959    | Kinase                              | 0.104672 | 69 / 0 Å Å Å Å Å    | Cannabielsoin |

|                                                                         |              |                  |               |                                                         |          |                     |               |
|-------------------------------------------------------------------------|--------------|------------------|---------------|---------------------------------------------------------|----------|---------------------|---------------|
| CDK8/Cyclin C                                                           | CCNC<br>CDK8 | P24863<br>P49336 | CHEMBL3038474 | Kinase                                                  | 0.104672 | 11 /<br>0Â Â Â Â Â  | Cannabielsoin |
| Von Hippel-Lindau<br>disease tumor<br>suppressor/Elongin<br>B/Elongin C | VHL          | P40337           | CHEMBL3108660 | Unclassified<br>protein                                 | 0.104672 | 6 /<br>0Â Â Â Â Â   | Cannabielsoin |
| Serine/threonine-<br>protein kinase B-raf                               | BRAF         | P15056           | CHEMBL5145    | Kinase                                                  | 0.104672 | 130 /<br>0Â Â Â Â Â | Cannabielsoin |
| Cell division protein<br>kinase 8                                       | CDK8         | P49336           | CHEMBL5719    | Kinase                                                  | 0.104672 | 24 /<br>0Â Â Â Â Â  | Cannabielsoin |
| Isocitrate<br>dehydrogenase<br>[NADP] cytoplasmic                       | IDH1         | O75874           | CHEMBL2007625 | Enzyme                                                  | 0.104672 | 22 /<br>0Â Â Â Â Â  | Cannabielsoin |
| Metabotropic<br>glutamate receptor 5                                    | GRM5         | P41594           | CHEMBL3227    | Family C G<br>protein-<br>coupled<br>receptor           | 0.104672 | 85 /<br>0Â Â Â Â Â  | Cannabielsoin |
| Cystic fibrosis<br>transmembrane<br>conductance<br>regulator            | CFTR         | P13569           | CHEMBL4051    | Other ion<br>channel                                    | 0.104672 | 22 /<br>0Â Â Â Â Â  | Cannabielsoin |
| Serine/threonine-<br>protein kinase PIM1                                | PIM1         | P11309           | CHEMBL2147    | Kinase                                                  | 0.104672 | 146 /<br>0Â Â Â Â Â | Cannabielsoin |
| Liver glycogen<br>phosphorylase                                         | PYGL         | P06737           | CHEMBL2568    | Enzyme                                                  | 0.104672 | 86 /<br>0Â Â Â Â Â  | Cannabielsoin |
| AMP deaminase 3                                                         | AMPD3        | Q01432           | CHEMBL2912    | Enzyme                                                  | 0.104672 | 9 /<br>0Â Â Â Â Â   | Cannabielsoin |
| Heat shock protein<br>HSP 90-beta                                       | HSP90A<br>B1 | P08238           | CHEMBL4303    | Other<br>cytosolic<br>protein                           | 0.104672 | 55 /<br>0Â Â Â Â Â  | Cannabielsoin |
| Voltage-gated<br>potassium channel<br>subunit Kv1.5                     | KCNA5        | P22460           | CHEMBL4306    | Voltage-<br>gated ion<br>channel                        | 0.104672 | 78 /<br>0Â Â Â Â Â  | Cannabielsoin |
| Kallikrein 5                                                            | KLK5         | Q9Y33<br>7       | CHEMBL4447    | Protease                                                | 0.104672 | 3 /<br>0Â Â Â Â Â   | Cannabielsoin |
| Serine/threonine-<br>protein kinase PIM2                                | PIM2         | Q9P1W<br>9       | CHEMBL4523    | Kinase                                                  | 0.104672 | 108 /<br>0Â Â Â Â Â | Cannabielsoin |
| Kinesin-like protein<br>1                                               | KIF11        | P52732           | CHEMBL4581    | Other<br>cytosolic<br>protein                           | 0.104672 | 33 /<br>0Â Â Â Â Â  | Cannabielsoin |
| p53-binding protein<br>Mdm-2                                            | MDM2         | Q00987           | CHEMBL5023    | Other<br>nuclear<br>protein                             | 0.104672 | 269 /<br>0Â Â Â Â Â | Cannabielsoin |
| Smoothered<br>homolog                                                   | SMO          | Q99835           | CHEMBL5971    | Frizzled<br>family G<br>protein-<br>coupled<br>receptor | 0.104672 | 30 /<br>0Â Â Â Â Â  | Cannabielsoin |
| Tyrosine-protein<br>kinase JAK1                                         | JAK1         | P23458           | CHEMBL2835    | Kinase                                                  | 0.104672 | 165 /<br>0Â Â Â Â Â | Cannabielsoin |
| Sphingosine kinase 2                                                    | SPHK2        | Q9NRA<br>0       | CHEMBL3023    | Enzyme                                                  | 0.104672 | 14 /<br>0Â Â Â Â Â  | Cannabielsoin |
| Tyrosine-protein<br>kinase TYK2                                         | TYK2         | P29597           | CHEMBL3553    | Kinase                                                  | 0.104672 | 69 /<br>0Â Â Â Â Â  | Cannabielsoin |
| Interleukin-8<br>receptor A                                             | CXCR1        | P25024           | CHEMBL4029    | Family A G<br>protein-<br>coupled<br>receptor           | 0.104672 | 82 /<br>0Â Â Â Â Â  | Cannabielsoin |

|                                                  |               |                  |               |                                     |          |                       |               |
|--------------------------------------------------|---------------|------------------|---------------|-------------------------------------|----------|-----------------------|---------------|
| Sphingosine kinase 1                             | SPHK1         | Q9NYA1           | CHEMBL4394    | Enzyme                              | 0.104672 | 15 /<br>0Â Â Â Â Â    | Cannabielsoin |
| Acetyl-CoA carboxylase 2                         | ACACB         | O00763           | CHEMBL4829    | Ligase                              | 0.104672 | 83 /<br>0Â Â Â Â Â    | Cannabielsoin |
| Cyclin-dependent kinase 2/cyclin E1              | CCNE1<br>CDK2 | P24864<br>P24941 | CHEMBL1907605 | Kinase                              | 0.104672 | 79 /<br>0Â Â Â Â Â    | Cannabielsoin |
|                                                  |               |                  |               |                                     |          |                       |               |
| Cannabinoid receptor 1                           | CNR1          | P21554           | CHEMBL218     | Family A G protein-coupled receptor | 0.743196 | 807 /<br>157Â Â Â Â Â | Cannabigerol  |
| Cannabinoid receptor 2                           | CNR2          | P34972           | CHEMBL253     | Family A G protein-coupled receptor | 0.651481 | 693 /<br>136Â Â Â Â Â | Cannabigerol  |
| G-protein coupled receptor 55                    | GPR55         | Q9Y2T6           | CHEMBL1075322 | Family A G protein-coupled receptor | 0.12661  | 10 /<br>2Â Â Â Â Â    | Cannabigerol  |
| Arachidonate 5-lipoxygenase                      | ALOX5         | P09917           | CHEMBL215     | Oxidoreductase                      | 0.109946 | 83 /<br>22Â Â Â Â Â   | Cannabigerol  |
| DNA polymerase beta (by homology)                | POLB          | P06746           | CHEMBL2392    | Enzyme                              | 0.101614 | 0 /<br>3Â Â Â Â Â     | Cannabigerol  |
| Arachidonate 15-lipoxygenase                     | ALOX15        | P16050           | CHEMBL2903    | Enzyme                              | 0.101614 | 15 /<br>16Â Â Â Â Â   | Cannabigerol  |
| Peroxisome proliferator-activated receptor gamma | PPARG         | P37231           | CHEMBL235     | Nuclear receptor                    | 0.101614 | 19 /<br>17Â Â Â Â Â   | Cannabigerol  |
| Peroxisome proliferator-activated receptor alpha | PPARA         | Q07869           | CHEMBL239     | Nuclear receptor                    | 0.101614 | 1 /<br>14Â Â Â Â Â    | Cannabigerol  |
| Cyclooxygenase-2                                 | PTGS2         | P35354           | CHEMBL230     | Oxidoreductase                      | 0.101614 | 137 /<br>6Â Â Â Â Â   | Cannabigerol  |
| ADAMTS5                                          | ADAMTS5       | Q9UNAO           | CHEMBL2285    | Protease                            | 0.101614 | 48 /<br>0Â Â Â Â Â    | Cannabigerol  |
| Poly [ADP-ribose] polymerase-1                   | PARP1         | P09874           | CHEMBL3105    | Enzyme                              | 0.101614 | 55 /<br>0Â Â Â Â Â    | Cannabigerol  |
| Cyclin-dependent kinase 4                        | CDK4          | P11802           | CHEMBL331     | Kinase                              | 0.101614 | 30 /<br>0Â Â Â Â Â    | Cannabigerol  |
| 11-beta-hydroxysteroid dehydrogenase 1           | HSD11B1       | P28845           | CHEMBL4235    | Enzyme                              | 0.101614 | 202 /<br>0Â Â Â Â Â   | Cannabigerol  |
| Prostanoid EP4 receptor                          | PTGER4        | P35408           | CHEMBL1836    | Family A G protein-coupled receptor | 0.101614 | 7 /<br>0Â Â Â Â Â     | Cannabigerol  |
| Acyl coenzyme A:cholesterol acyltransferase      | CES1          | P23141           | CHEMBL2265    | Enzyme                              | 0.101614 | 23 /<br>0Â Â Â Â Â    | Cannabigerol  |
| Carboxylesterase 2                               | CES2          | O00748           | CHEMBL3180    | Enzyme                              | 0.101614 | 3 /<br>0Â Â Â Â Â     | Cannabigerol  |
| NAD-dependent deacetylase sirtuin 2              | SIRT2         | Q8IXJ6           | CHEMBL4462    | Eraser                              | 0.101614 | 37 /<br>0Â Â Â Â Â    | Cannabigerol  |
| Adenosine A1 receptor                            | ADORA1        | P30542           | CHEMBL226     | Family A G protein-coupled receptor | 0.101614 | 196 /<br>0Â Â Â Â Â   | Cannabigerol  |
| Beta-secretase 1                                 | BACE1         | P56817           | CHEMBL4822    | Protease                            | 0.101614 | 374 /<br>0Â Â Â Â Â   | Cannabigerol  |



|                                                     |                 |                  |               |                                     |          |                  |              |
|-----------------------------------------------------|-----------------|------------------|---------------|-------------------------------------|----------|------------------|--------------|
| Corticotropin releasing factor receptor 1           | CRHR1           | P34998           | CHEMBL1800    | Family B G protein-coupled receptor | 0.101614 | 111 / 0Â Â Â Â Â | Cannabigerol |
| Phosphodiesterase 10A (by homology)                 | PDE10A          | Q9Y233           | CHEMBL4409    | Phosphodiesterase                   | 0.101614 | 588 / 0Â Â Â Â Â | Cannabigerol |
| p53-binding protein Mdm-2                           | MDM2            | Q00987           | CHEMBL5023    | Other nuclear protein               | 0.101614 | 162 / 0Â Â Â Â Â | Cannabigerol |
| Calpain 2                                           | CAPN2           | P17655           | CHEMBL2382    | Protease                            | 0.101614 | 42 / 0Â Â Â Â Â  | Cannabigerol |
| LDL-associated phospholipase A2                     | PLA2G7          | Q13093           | CHEMBL3514    | Enzyme                              | 0.101614 | 39 / 0Â Â Â Â Â  | Cannabigerol |
| Receptor protein-tyrosine kinase erbB-2             | ERBB2           | P04626           | CHEMBL1824    | Kinase                              | 0.101614 | 65 / 0Â Â Â Â Â  | Cannabigerol |
| Epidermal growth factor receptor erbB1              | EGFR            | P00533           | CHEMBL203     | Kinase                              | 0.101614 | 263 / 0Â Â Â Â Â | Cannabigerol |
| Anandamide amidohydrolase                           | FAAH            | O00519           | CHEMBL2243    | Enzyme                              | 0.101614 | 178 / 0Â Â Â Â Â | Cannabigerol |
| Cystic fibrosis transmembrane conductance regulator | CFTR            | P13569           | CHEMBL4051    | Other ion channel                   | 0.101614 | 18 / 0Â Â Â Â Â  | Cannabigerol |
| Neurokinin 1 receptor                               | TACR1           | P25103           | CHEMBL249     | Family A G protein-coupled receptor | 0.101614 | 121 / 0Â Â Â Â Â | Cannabigerol |
| Histone deacetylase 1                               | HDAC1           | Q13547           | CHEMBL325     | Eraser                              | 0.101614 | 104 / 0Â Â Â Â Â | Cannabigerol |
| G-protein coupled bile acid receptor 1              | GPBAR1          | Q8TDU6           | CHEMBL5409    | Family A G protein-coupled receptor | 0.101614 | 32 / 0Â Â Â Â Â  | Cannabigerol |
| Thymidylate synthase                                | TYMS            | P04818           | CHEMBL1952    | Transferase                         | 0.101614 | 28 / 0Â Â Â Â Â  | Cannabigerol |
| Adenosine A2a receptor                              | ADORA2A         | P29274           | CHEMBL251     | Family A G protein-coupled receptor | 0.101614 | 149 / 0Â Â Â Â Â | Cannabigerol |
| Phosphodiesterase 7A                                | PDE7A           | Q13946           | CHEMBL3012    | Phosphodiesterase                   | 0.101614 | 16 / 0Â Â Â Â Â  | Cannabigerol |
| Interleukin-8 receptor A                            | CXCR1           | P25024           | CHEMBL4029    | Family A G protein-coupled receptor | 0.101614 | 14 / 0Â Â Â Â Â  | Cannabigerol |
| Carbonic anhydrase XII                              | CA12            | O43570           | CHEMBL3242    | Lyase                               | 0.101614 | 82 / 0Â Â Â Â Â  | Cannabigerol |
| Calcium sensing receptor                            | CASR            | P41180           | CHEMBL1878    | Family C G protein-coupled receptor | 0.101614 | 33 / 0Â Â Â Â Â  | Cannabigerol |
| Sphingosine 1-phosphate receptor Edg-3              | S1PR3           | Q99500           | CHEMBL3892    | Family A G protein-coupled receptor | 0.101614 | 85 / 0Â Â Â Â Â  | Cannabigerol |
| Glutamate NMDA receptor; GRIN1/GRIN2B               | GRIN1<br>GRIN2B | Q05586<br>Q13224 | CHEMBL1907603 | Ligand-gated ion channel            | 0.101614 | 9 / 0Â Â Â Â Â   | Cannabigerol |

|                                           |                                        |                            |               |                                     |          |                     |              |
|-------------------------------------------|----------------------------------------|----------------------------|---------------|-------------------------------------|----------|---------------------|--------------|
| Protein farnesyltransferase               | FNTA<br>FNTB                           | P49354<br>P49356           | CHEMBL2094108 | Enzyme                              | 0.101614 | 224 /<br>0Â Â Â Â Â | Cannabigerol |
| Estradiol 17-beta-dehydrogenase 2         | HSD17B<br>2                            | P37059                     | CHEMBL2789    | Enzyme                              | 0.101614 | 21 /<br>0Â Â Â Â Â  | Cannabigerol |
| Cholesteryl ester transfer protein        | CETP                                   | P11597                     | CHEMBL3572    | Other ion channel                   | 0.101614 | 13 /<br>3Â Â Â Â Â  | Cannabigerol |
| Translocator protein (by homology)        | TSPO                                   | P30536                     | CHEMBL5742    | Membrane receptor                   | 0.101614 | 241 /<br>0Â Â Â Â Â | Cannabigerol |
| Melatonin receptor 1A                     | MTNR1<br>A                             | P48039                     | CHEMBL1945    | Family A G protein-coupled receptor | 0.101614 | 75 /<br>0Â Â Â Â Â  | Cannabigerol |
| Melatonin receptor 1B                     | MTNR1<br>B                             | P49286                     | CHEMBL1946    | Family A G protein-coupled receptor | 0.101614 | 67 /<br>0Â Â Â Â Â  | Cannabigerol |
| Cathepsin K                               | CTSK                                   | P43235                     | CHEMBL268     | Protease                            | 0.101614 | 261 /<br>2Â Â Â Â Â | Cannabigerol |
| P-glycoprotein 1                          | ABCB1                                  | P08183                     | CHEMBL4302    | Primary active transporter          | 0.101614 | 19 /<br>0Â Â Â Â Â  | Cannabigerol |
| NADPH oxidase 4                           | NOX4                                   | Q9NPH<br>5                 | CHEMBL1250375 | Enzyme                              | 0.101614 | 3 /<br>0Â Â Â Â Â   | Cannabigerol |
| Vasopressin V2 receptor (by homology)     | AVPR2                                  | P30518                     | CHEMBL1790    | Family A G protein-coupled receptor | 0.101614 | 62 /<br>0Â Â Â Â Â  | Cannabigerol |
| Oxytocin receptor (by homology)           | OXTR                                   | P30559                     | CHEMBL2049    | Family A G protein-coupled receptor | 0.101614 | 97 /<br>0Â Â Â Â Â  | Cannabigerol |
| Calpain 1                                 | CAPN1                                  | P07384                     | CHEMBL3891    | Protease                            | 0.101614 | 83 /<br>0Â Â Â Â Â  | Cannabigerol |
| Pantothenate kinase 3                     | PANK3                                  | Q9H99<br>9                 | CHEMBL3407328 | Enzyme                              | 0.101614 | 2 /<br>0Â Â Â Â Â   | Cannabigerol |
| Pyroglutamylated RFamide peptide receptor | QRFPR                                  | Q96P65                     | CHEMBL5852    | Family A G protein-coupled receptor | 0.101614 | 7 /<br>0Â Â Â Â Â   | Cannabigerol |
| Monoamine oxidase A                       | MAOA                                   | P21397                     | CHEMBL1951    | Oxidoreductase                      | 0.101614 | 79 /<br>0Â Â Â Â Â  | Cannabigerol |
| GABA-A receptor; alpha-3/beta-3/gamma-2   | GABRB<br>3<br>GABRA<br>3<br>GABRG<br>2 | P28472<br>P34903<br>P18507 | CHEMBL2094120 | Ligand-gated ion channel            | 0.101614 | 48 /<br>0Â Â Â Â Â  | Cannabigerol |
| GABA-A receptor; alpha-1/beta-3/gamma-2   | GABRB<br>3<br>GABRG<br>2<br>GABRA<br>1 | P28472<br>P18507<br>P14867 | CHEMBL2094121 | Ligand-gated ion channel            | 0.101614 | 40 /<br>0Â Â Â Â Â  | Cannabigerol |
| GABA-A receptor; alpha-5/beta-3/gamma-2   | GABRB<br>3<br>GABRG<br>2<br>GABRA<br>5 | P28472<br>P18507<br>P31644 | CHEMBL2094122 | Ligand-gated ion channel            | 0.101614 | 48 /<br>0Â Â Â Â Â  | Cannabigerol |

|                                                             |                            |                            |               |                                     |          |                      |              |
|-------------------------------------------------------------|----------------------------|----------------------------|---------------|-------------------------------------|----------|----------------------|--------------|
| GABA-A receptor; alpha-2/beta-3/gamma-2                     | GABRA2<br>GABRB3<br>GABRG2 | P47869<br>P28472<br>P18507 | CHEMBL2094130 | Ligand-gated ion channel            | 0.101614 | 51 /<br>0Â Â Â Â Â   | Cannabigerol |
| Neurokinin 3 receptor                                       | TACR3                      | P29371                     | CHEMBL4429    | Family A G protein-coupled receptor | 0.101614 | 112 /<br>0Â Â Â Â Â  | Cannabigerol |
| L-lactate dehydrogenase A chain                             | LDHA                       | P00338                     | CHEMBL4835    | Enzyme                              | 0.101614 | 5 /<br>0Â Â Â Â Â    | Cannabigerol |
| Calpain 1                                                   | CAPN1<br>CAPNS1            | P07384<br>P04632           | CHEMBL2111357 | Protease                            | 0.101614 | 26 /<br>0Â Â Â Â Â   | Cannabigerol |
| Cholecystokinin B receptor                                  | CCKBR                      | P32239                     | CHEMBL298     | Family A G protein-coupled receptor | 0.101614 | 400 /<br>0Â Â Â Â Â  | Cannabigerol |
| Serotonin 5a (5-HT5a) receptor                              | HTR5A                      | P47898                     | CHEMBL3426    | Family A G protein-coupled receptor | 0.101614 | 7 /<br>0Â Â Â Â Â    | Cannabigerol |
| Voltage-gated potassium channel subunit Kv1.5               | KCNA5                      | P22460                     | CHEMBL4306    | Voltage-gated ion channel           | 0.101614 | 105 /<br>0Â Â Â Â Â  | Cannabigerol |
| P2X purinoceptor 7                                          | P2RX7                      | Q99572                     | CHEMBL4805    | Ligand-gated ion channel            | 0.101614 | 66 /<br>0Â Â Â Â Â   | Cannabigerol |
| Alkaline phosphatase, tissue-nonspecific isozyme            | ALPL                       | P05186                     | CHEMBL5979    | Enzyme                              | 0        | 10 /<br>0Â Â Â Â Â   | Cannabigerol |
| Vascular endothelial growth factor receptor 2               | KDR                        | P35968                     | CHEMBL279     | Kinase                              | 0        | 348 /<br>13Â Â Â Â Â | Cannabigerol |
| Sodium channel protein type IX alpha subunit                | SCN9A                      | Q15858                     | CHEMBL4296    | Voltage-gated ion channel           | 0        | 75 /<br>0Â Â Â Â Â   | Cannabigerol |
| Thrombin and coagulation factor X                           | F10                        | P00742                     | CHEMBL244     | Protease                            | 0        | 231 /<br>0Â Â Â Â Â  | Cannabigerol |
| Serine/threonine-protein kinase PLK1                        | PLK1                       | P53350                     | CHEMBL3024    | Kinase                              | 0        | 19 /<br>0Â Â Â Â Â   | Cannabigerol |
| Kinesin-1 heavy chain/ Tyrosine-protein kinase receptor RET | RET                        | P07949                     | CHEMBL2041    | Kinase                              | 0        | 27 /<br>0Â Â Â Â Â   | Cannabigerol |
| Dopamine D4 receptor                                        | DRD4                       | P21917                     | CHEMBL219     | Family A G protein-coupled receptor | 0        | 72 /<br>0Â Â Â Â Â   | Cannabigerol |
| Beta secretase 2                                            | BACE2                      | Q9Y5Z0                     | CHEMBL2525    | Protease                            | 0        | 97 /<br>0Â Â Â Â Â   | Cannabigerol |
| GABA receptor alpha-1 subunit                               | GABRA1                     | P14867                     | CHEMBL1962    | Ligand-gated ion channel            | 0        | 24 /<br>0Â Â Â Â Â   | Cannabigerol |
| GABA receptor alpha-2 subunit                               | GABRA2                     | P47869                     | CHEMBL4956    | Ligand-gated ion channel            | 0        | 32 /<br>0Â Â Â Â Â   | Cannabigerol |

|                                               |            |              |               |                                            |   |         |              |
|-----------------------------------------------|------------|--------------|---------------|--------------------------------------------|---|---------|--------------|
| Tyrosine-protein kinase JAK3                  | JAK3       | P52333       | CHEMBL2148    | Kinase                                     | 0 | 207 / 0 | Cannabigerol |
| Adenosine A2b receptor                        | ADORA2B    | P29275       | CHEMBL255     | Family A G protein-coupled receptor        | 0 | 26 / 0  | Cannabigerol |
| Prenyl protein specific protease              | RCE1       | Q9Y256       | CHEMBL3411    | Protease                                   | 0 | 6 / 0   | Cannabigerol |
| Cytochrome b-c1 complex subunit 7             | UQCRB      | P14927       | CHEMBL1671612 | Transmembrane 1-electron transfer carriers | 0 | 1 / 0   | Cannabigerol |
| Integrin alpha-4/beta-7                       | ITGB7ITGA4 | P26010P13612 | CHEMBL2095184 | Membrane receptor                          | 0 | 6 / 0   | Cannabigerol |
| 3-phosphoinositide dependent protein kinase-1 | PDPK1      | O15530       | CHEMBL2534    | Kinase                                     | 0 | 36 / 0  | Cannabigerol |
| Renin                                         | REN        | P00797       | CHEMBL286     | Protease                                   | 0 | 15 / 0  | Cannabigerol |
| Leukotriene A4 hydrolase                      | LTA4H      | P09960       | CHEMBL4618    | Protease                                   | 0 | 10 / 0  | Cannabigerol |
| Prostanoid EP1 receptor                       | PTGER1     | P34995       | CHEMBL1811    | Family A G protein-coupled receptor        | 0 | 49 / 0  | Cannabigerol |
| Sodium channel protein type V alpha subunit   | SCN5A      | Q14524       | CHEMBL1980    | Voltage-gated ion channel                  | 0 | 21 / 0  | Cannabigerol |
| c-Jun N-terminal kinase 1                     | MAPK8      | P45983       | CHEMBL2276    | Kinase                                     | 0 | 123 / 0 | Cannabigerol |
| c-Jun N-terminal kinase 3                     | MAPK10     | P53779       | CHEMBL2637    | Kinase                                     | 0 | 89 / 0  | Cannabigerol |
| PI3-kinase p110-alpha subunit                 | PIK3CA     | P42336       | CHEMBL4005    | Enzyme                                     | 0 | 127 / 0 | Cannabigerol |
| c-Jun N-terminal kinase 2                     | MAPK9      | P45984       | CHEMBL4179    | Kinase                                     | 0 | 58 / 0  | Cannabigerol |
| Sodium channel protein type II alpha subunit  | SCN2A      | Q99250       | CHEMBL4187    | Voltage-gated ion channel                  | 0 | 30 / 0  | Cannabigerol |
| Isocitrate dehydrogenase [NADP] cytoplasmic   | IDH1       | O75874       | CHEMBL2007625 | Enzyme                                     | 0 | 112 / 0 | Cannabigerol |
| Alpha-1d adrenergic receptor                  | ADRA1D     | P25100       | CHEMBL223     | Family A G protein-coupled receptor        | 0 | 34 / 0  | Cannabigerol |
| Alpha-1a adrenergic receptor                  | ADRA1A     | P35348       | CHEMBL229     | Family A G protein-coupled receptor        | 0 | 45 / 0  | Cannabigerol |
| Interleukin-8 receptor B                      | CXCR2      | P25025       | CHEMBL2434    | Family A G protein-coupled receptor        | 0 | 52 / 0  | Cannabigerol |
| Carboxypeptidase B                            | CPB1       | P15086       | CHEMBL2552    | Protease                                   | 0 | 2 / 0   | Cannabigerol |
| Tyrosine-protein kinase JAK1                  | JAK1       | P23458       | CHEMBL2835    | Kinase                                     | 0 | 71 / 0  | Cannabigerol |

|                                                     |           |        |            |                                     |          |                      |               |
|-----------------------------------------------------|-----------|--------|------------|-------------------------------------|----------|----------------------|---------------|
| Tyrosine-protein kinase JAK2                        | JAK2      | O60674 | CHEMBL2971 | Kinase                              | 0        | 160 /<br>0Â Â Â Â Â  | Cannabigerol  |
| Cyclin-dependent kinase 2                           | CDK2      | P24941 | CHEMBL301  | Kinase                              | 0        | 84 /<br>0Â Â Â Â Â   | Cannabigerol  |
| Cyclin-dependent kinase 1                           | CDK1      | P06493 | CHEMBL308  | Kinase                              | 0        | 65 /<br>0Â Â Â Â Â   | Cannabigerol  |
| Heat shock protein HSP 90-beta                      | HSP90A B1 | P08238 | CHEMBL4303 | Other cytosolic protein             | 0        | 64 /<br>0Â Â Â Â Â   | Cannabigerol  |
|                                                     |           |        |            |                                     |          |                      |               |
| Cannabinoid receptor 1                              | CNR1      | P21554 | CHEMBL218  | Family A G protein-coupled receptor | 0.226582 | 759 /<br>73Â Â Â Â Â | Cannabinodiol |
| Cannabinoid receptor 2                              | CNR2      | P34972 | CHEMBL253  | Family A G protein-coupled receptor | 0.209877 | 632 /<br>73Â Â Â Â Â | Cannabinodiol |
| Epidermal growth factor receptor erbB1              | EGFR      | P00533 | CHEMBL203  | Kinase                              | 0.101614 | 230 /<br>0Â Â Â Â Â  | Cannabinodiol |
| Receptor protein-tyrosine kinase erbB-2             | ERBB2     | P04626 | CHEMBL1824 | Kinase                              | 0.101614 | 44 /<br>0Â Â Â Â Â   | Cannabinodiol |
| Glycine receptor subunit alpha-1                    | GLRA1     | P23415 | CHEMBL5845 | Ligand-gated ion channel            | 0.101614 | 1 /<br>0Â Â Â Â Â    | Cannabinodiol |
| Cystic fibrosis transmembrane conductance regulator | CFTR      | P13569 | CHEMBL4051 | Other ion channel                   | 0.101614 | 11 /<br>0Â Â Â Â Â   | Cannabinodiol |
| Serotonin 2b (5-HT2b) receptor                      | HTR2B     | P41595 | CHEMBL1833 | Family A G protein-coupled receptor | 0.101614 | 31 /<br>0Â Â Â Â Â   | Cannabinodiol |
| Serotonin 2a (5-HT2a) receptor (by homology)        | HTR2A     | P28223 | CHEMBL224  | Family A G protein-coupled receptor | 0.101614 | 31 /<br>0Â Â Â Â Â   | Cannabinodiol |
| Serotonin 2c (5-HT2c) receptor                      | HTR2C     | P28335 | CHEMBL225  | Family A G protein-coupled receptor | 0.101614 | 41 /<br>0Â Â Â Â Â   | Cannabinodiol |
| NAD-dependent deacetylase sirtuin 2                 | SIRT2     | Q8IXJ6 | CHEMBL4462 | Eraser                              | 0.101614 | 26 /<br>0Â Â Â Â Â   | Cannabinodiol |
| 5-lipoxygenase activating protein                   | ALOX5 AP  | P20292 | CHEMBL4550 | Other cytosolic protein             | 0.101614 | 57 /<br>0Â Â Â Â Â   | Cannabinodiol |
| Calcium sensing receptor                            | CASR      | P41180 | CHEMBL1878 | Family C G protein-coupled receptor | 0.101614 | 37 /<br>0Â Â Â Â Â   | Cannabinodiol |
| Prenyl protein specific protease                    | RCE1      | Q9Y256 | CHEMBL3411 | Protease                            | 0.101614 | 6 /<br>0Â Â Â Â Â    | Cannabinodiol |
| Melanocortin receptor 4                             | MC4R      | P32245 | CHEMBL259  | Family A G protein-coupled receptor | 0.101614 | 16 /<br>0Â Â Â Â Â   | Cannabinodiol |
| Glucagon receptor                                   | GCGR      | P47871 | CHEMBL1985 | Family B G protein-                 | 0.101614 | 28 /<br>0Â Â Â Â Â   | Cannabinodiol |

|                                        |         |        |            |                                     |          |                  |               |
|----------------------------------------|---------|--------|------------|-------------------------------------|----------|------------------|---------------|
|                                        |         |        |            | coupled receptor                    |          |                  |               |
| Interleukin-8 receptor B               | CXCR2   | P25025 | CHEMBL2434 | Family A G protein-coupled receptor | 0.101614 | 41 / 0Â Â Â Â Â  | Cannabinodiol |
| Neurokinin 2 receptor                  | TACR2   | P21452 | CHEMBL2327 | Family A G protein-coupled receptor | 0.101614 | 8 / 0Â Â Â Â Â   | Cannabinodiol |
| Epoxide hydratase                      | EPHX2   | P34913 | CHEMBL2409 | Protease                            | 0.101614 | 86 / 0Â Â Â Â Â  | Cannabinodiol |
| Cathepsin D                            | CTSD    | P07339 | CHEMBL2581 | Protease                            | 0.101614 | 18 / 0Â Â Â Â Â  | Cannabinodiol |
| Poly [ADP-ribose] polymerase-1         | PARP1   | P09874 | CHEMBL3105 | Enzyme                              | 0.101614 | 13 / 0Â Â Â Â Â  | Cannabinodiol |
| Neurokinin 3 receptor                  | TACR3   | P29371 | CHEMBL4429 | Family A G protein-coupled receptor | 0.101614 | 102 / 0Â Â Â Â Â | Cannabinodiol |
| Beta-secretase 1                       | BACE1   | P56817 | CHEMBL4822 | Protease                            | 0.101614 | 161 / 0Â Â Â Â Â | Cannabinodiol |
| Translocator protein (by homology)     | TSPO    | P30536 | CHEMBL5742 | Membrane receptor                   | 0.101614 | 318 / 0Â Â Â Â Â | Cannabinodiol |
| Phosphodiesterase 4B                   | PDE4B   | Q07343 | CHEMBL275  | Phosphodiesterase                   | 0.101614 | 25 / 0Â Â Â Â Â  | Cannabinodiol |
| Mu opioid receptor                     | OPRM1   | P35372 | CHEMBL233  | Family A G protein-coupled receptor | 0.101614 | 15 / 0Â Â Â Â Â  | Cannabinodiol |
| Estradiol 17-beta-dehydrogenase 3      | HSD17B3 | P37058 | CHEMBL4234 | Enzyme                              | 0.101614 | 3 / 0Â Â Â Â Â   | Cannabinodiol |
| 11-beta-hydroxysteroid dehydrogenase 1 | HSD11B1 | P28845 | CHEMBL4235 | Enzyme                              | 0.101614 | 222 / 0Â Â Â Â Â | Cannabinodiol |
| ADAMTS5                                | ADAMTS5 | Q9UNA0 | CHEMBL2285 | Protease                            | 0.101614 | 29 / 0Â Â Â Â Â  | Cannabinodiol |
| Thymidylate synthase                   | TYMS    | P04818 | CHEMBL1952 | Transferase                         | 0.101614 | 22 / 0Â Â Â Â Â  | Cannabinodiol |
| Metabotropic glutamate receptor 5      | GRM5    | P41594 | CHEMBL3227 | Family C G protein-coupled receptor | 0.101614 | 238 / 0Â Â Â Â Â | Cannabinodiol |
| Monoglyceride lipase                   | MGLL    | Q99685 | CHEMBL4191 | Enzyme                              | 0.101614 | 13 / 0Â Â Â Â Â  | Cannabinodiol |
| Quinone reductase 2                    | NQO2    | P16083 | CHEMBL3959 | Enzyme                              | 0.101614 | 7 / 0Â Â Â Â Â   | Cannabinodiol |
| p53-binding protein Mdm-2              | MDM2    | Q00987 | CHEMBL5023 | Other nuclear protein               | 0.101614 | 48 / 0Â Â Â Â Â  | Cannabinodiol |
| Monoamine oxidase B                    | MAOB    | P27338 | CHEMBL2039 | Oxidoreductase                      | 0.101614 | 142 / 0Â Â Â Â Â | Cannabinodiol |
| Nitric-oxide synthase, brain           | NOS1    | P29475 | CHEMBL3568 | Enzyme                              | 0.101614 | 32 / 0Â Â Â Â Â  | Cannabinodiol |
| Nitric-oxide synthase, endothelial     | NOS3    | P29474 | CHEMBL4803 | Enzyme                              | 0.101614 | 14 / 0Â Â Â Â Â  | Cannabinodiol |
| Tyrosine-protein kinase JAK2           | JAK2    | O60674 | CHEMBL2971 | Kinase                              | 0.101614 | 158 / 0Â Â Â Â Â | Cannabinodiol |

|                                                        |                |                  |               |                                     |          |                  |               |
|--------------------------------------------------------|----------------|------------------|---------------|-------------------------------------|----------|------------------|---------------|
| Cholecystokinin B receptor (by homology)               | CCKBR          | P32239           | CHEMBL298     | Family A G protein-coupled receptor | 0.101614 | 221 / 0Â Â Â Â Â | Cannabinodiol |
| Serine/threonine-protein kinase PAK 1                  | PAK1           | Q13153           | CHEMBL4600    | Kinase                              | 0.101614 | 1 / 0Â Â Â Â Â   | Cannabinodiol |
| Prostanoid EP1 receptor                                | PTGER1         | P34995           | CHEMBL1811    | Family A G protein-coupled receptor | 0.101614 | 39 / 0Â Â Â Â Â  | Cannabinodiol |
| Pyruvate kinase isozymes M1/M2                         | PKM            | P14618           | CHEMBL1075189 | Enzyme                              | 0.101614 | 7 / 0Â Â Â Â Â   | Cannabinodiol |
| Cyclin-dependent kinase 5/CDK5 activator 1             | CDK5R1<br>CDK5 | Q15078<br>Q00535 | CHEMBL1907600 | Kinase                              | 0.101614 | 90 / 0Â Â Â Â Â  | Cannabinodiol |
| Serine/threonine-protein kinase Aurora-B               | AURKB          | Q96GD<br>4       | CHEMBL2185    | Kinase                              | 0.101614 | 25 / 0Â Â Â Â Â  | Cannabinodiol |
| Serine/threonine-protein kinase Aurora-C               | AURKC          | Q9UQB<br>9       | CHEMBL3935    | Kinase                              | 0.101614 | 11 / 0Â Â Â Â Â  | Cannabinodiol |
| Serine/threonine-protein kinase Aurora-A               | AURKA          | O14965           | CHEMBL4722    | Kinase                              | 0.101614 | 31 / 0Â Â Â Â Â  | Cannabinodiol |
| Corticotropin releasing factor receptor 1              | CRHR1          | P34998           | CHEMBL1800    | Family B G protein-coupled receptor | 0        | 153 / 0Â Â Â Â Â | Cannabinodiol |
| Anandamide amidohydrolase                              | FAAH           | O00519           | CHEMBL2243    | Enzyme                              | 0        | 57 / 0Â Â Â Â Â  | Cannabinodiol |
| MAP kinase p38 alpha                                   | MAPK1<br>4     | Q16539           | CHEMBL260     | Kinase                              | 0        | 344 / 0Â Â Â Â Â | Cannabinodiol |
| Mineralocorticoid receptor                             | NR3C2          | P08235           | CHEMBL1994    | Nuclear receptor                    | 0        | 67 / 0Â Â Â Â Â  | Cannabinodiol |
| Voltage-gated potassium channel subunit Kv1.5          | KCNA5          | P22460           | CHEMBL4306    | Voltage-gated ion channel           | 0        | 99 / 0Â Â Â Â Â  | Cannabinodiol |
| ATP-binding cassette sub-family G member 2             | ABCG2          | Q9UNQ<br>0       | CHEMBL5393    | Primary active transporter          | 0        | 11 / 0Â Â Â Â Â  | Cannabinodiol |
| Serine/threonine-protein kinase/endoribonucle ase IRE1 | ERN1           | O75460           | CHEMBL1163101 | Enzyme                              | 0        | 3 / 0Â Â Â Â Â   | Cannabinodiol |
| LDL-associated phospholipase A2                        | PLA2G7         | Q13093           | CHEMBL3514    | Enzyme                              | 0        | 15 / 0Â Â Â Â Â  | Cannabinodiol |
| Sodium channel protein type II alpha subunit           | SCN2A          | Q99250           | CHEMBL4187    | Voltage-gated ion channel           | 0        | 24 / 0Â Â Â Â Â  | Cannabinodiol |
| Muscarinic acetylcholine receptor M1 (by homology)     | CHRM1          | P11229           | CHEMBL216     | Family A G protein-coupled receptor | 0        | 37 / 0Â Â Â Â Â  | Cannabinodiol |
| Acetylcholinesterase                                   | ACHE           | P22303           | CHEMBL220     | Hydrolase                           | 0        | 84 / 0Â Â Â Â Â  | Cannabinodiol |
| Bombesin receptor subtype-3                            | BRS3           | P32247           | CHEMBL4080    | Family A G protein-coupled receptor | 0        | 1 / 0Â Â Â Â Â   | Cannabinodiol |

|                                                     |                                 |                                      |               |                                     |   |         |               |
|-----------------------------------------------------|---------------------------------|--------------------------------------|---------------|-------------------------------------|---|---------|---------------|
| Alpha-2a adrenergic receptor                        | ADRA2A                          | P08913                               | CHEMBL1867    | Family A G protein-coupled receptor | 0 | 63 / 0  | Cannabinodiol |
| Adrenergic receptor alpha-2                         | ADRA2C                          | P18825                               | CHEMBL1916    | Family A G protein-coupled receptor | 0 | 59 / 0  | Cannabinodiol |
| Alpha-2b adrenergic receptor                        | ADRA2B                          | P18089                               | CHEMBL1942    | Family A G protein-coupled receptor | 0 | 57 / 0  | Cannabinodiol |
| Macrophage migration inhibitory factor              | MIF                             | P14174                               | CHEMBL2085    | Enzyme                              | 0 | 5 / 0   | Cannabinodiol |
| Cyclin-dependent kinase 1/cyclin B                  | CCNB3<br>CDK1<br>CCNB1<br>CCNB2 | Q8WWL7<br>P06493<br>P14635<br>O95067 | CHEMBL2094127 | Other cytosolic protein             | 0 | 43 / 0  | Cannabinodiol |
| Bromodomain-containing protein 1                    | BRD1                            | O95696                               | CHEMBL2176774 | Reader                              | 0 | 6 / 0   | Cannabinodiol |
| Beta secretase 2                                    | BACE2                           | Q9Y5Z0                               | CHEMBL2525    | Protease                            | 0 | 33 / 0  | Cannabinodiol |
| Transcription intermediary factor 1-alpha           | TRIM24                          | O15164                               | CHEMBL3108638 | Reader                              | 0 | 9 / 0   | Cannabinodiol |
| Peregrin                                            | BRPF1                           | P55201                               | CHEMBL3132741 | Reader                              | 0 | 20 / 0  | Cannabinodiol |
| Nischarin                                           | NISCH                           | Q9Y2I1                               | CHEMBL3923    | Other cytosolic protein             | 0 | 41 / 0  | Cannabinodiol |
| Metabotropic glutamate receptor 2                   | GRM2                            | Q14416                               | CHEMBL5137    | Family C G protein-coupled receptor | 0 | 38 / 0  | Cannabinodiol |
| Cholecystokinin A receptor                          | CCKAR                           | P32238                               | CHEMBL1901    | Family A G protein-coupled receptor | 0 | 19 / 0  | Cannabinodiol |
| Tyrosine-protein kinase JAK3                        | JAK3                            | P52333                               | CHEMBL2148    | Kinase                              | 0 | 169 / 0 | Cannabinodiol |
| Calcium-activated potassium channel subunit alpha-1 | KCNMA1                          | Q12791                               | CHEMBL4304    | Voltage-gated ion channel           | 0 | 13 / 0  | Cannabinodiol |
| Alpha-1d adrenergic receptor                        | ADRA1D                          | P25100                               | CHEMBL223     | Family A G protein-coupled receptor | 0 | 17 / 0  | Cannabinodiol |
| Alpha-1a adrenergic receptor                        | ADRA1A                          | P35348                               | CHEMBL229     | Family A G protein-coupled receptor | 0 | 41 / 0  | Cannabinodiol |
| Alpha-1b adrenergic receptor                        | ADRA1B                          | P35368                               | CHEMBL232     | Family A G protein-coupled receptor | 0 | 19 / 0  | Cannabinodiol |
| Glycogen synthase kinase-3 beta                     | GSK3B                           | P49841                               | CHEMBL262     | Kinase                              | 0 | 52 / 0  | Cannabinodiol |



|                                                        |                            |                            |               |                                     |   |                  |               |
|--------------------------------------------------------|----------------------------|----------------------------|---------------|-------------------------------------|---|------------------|---------------|
| Serotonin 6 (5-HT6) receptor                           | HTR6                       | P50406                     | CHEMBL3371    | Family A G protein-coupled receptor | 0 | 59 / 0Â Â Â Â Â  | Cannabinodiol |
| 6-phosphofructo-2-kinase/fructose-2,6-bisphosphatase 3 | PFKFB3                     | Q16875                     | CHEMBL2331053 | Enzyme                              | 0 | 50 / 0Â Â Â Â Â  | Cannabinodiol |
| Mitogen-activated protein kinase kinase kinase 8       | MAP3K8                     | P41279                     | CHEMBL4899    | Kinase                              | 0 | 43 / 0Â Â Â Â Â  | Cannabinodiol |
| Serine/threonine-protein kinase B-raf                  | BRAF                       | P15056                     | CHEMBL5145    | Kinase                              | 0 | 74 / 0Â Â Â Â Â  | Cannabinodiol |
| Serine/threonine-protein kinase TNNI3K                 | TNNI3K                     | Q59H18                     | CHEMBL5260    | Kinase                              | 0 | 35 / 0Â Â Â Â Â  | Cannabinodiol |
| GABA-A receptor; alpha-3/beta-3/gamma-2                | GABRB3<br>GABRA3<br>GABRG2 | P28472<br>P34903<br>P18507 | CHEMBL2094120 | Ligand-gated ion channel            | 0 | 62 / 0Â Â Â Â Â  | Cannabinodiol |
| GABA-A receptor; alpha-1/beta-3/gamma-2                | GABRB3<br>GABRG2<br>GABRA1 | P28472<br>P18507<br>P14867 | CHEMBL2094121 | Ligand-gated ion channel            | 0 | 53 / 0Â Â Â Â Â  | Cannabinodiol |
| GABA-A receptor; alpha-5/beta-3/gamma-2                | GABRB3<br>GABRG2<br>GABRA5 | P28472<br>P18507<br>P31644 | CHEMBL2094122 | Ligand-gated ion channel            | 0 | 58 / 0Â Â Â Â Â  | Cannabinodiol |
| GABA-A receptor; alpha-2/beta-3/gamma-2                | GABRA2<br>GABRB3<br>GABRG2 | P47869<br>P28472<br>P18507 | CHEMBL2094130 | Ligand-gated ion channel            | 0 | 59 / 0Â Â Â Â Â  | Cannabinodiol |
| Prostaglandin E synthase                               | PTGES                      | O14684                     | CHEMBL5658    | Enzyme                              | 0 | 31 / 0Â Â Â Â Â  | Cannabinodiol |
| Melatonin receptor 1B                                  | MTNR1B                     | P49286                     | CHEMBL1946    | Family A G protein-coupled receptor | 0 | 49 / 0Â Â Â Â Â  | Cannabinodiol |
| Adenosine A1 receptor (by homology)                    | ADORA1                     | P30542                     | CHEMBL226     | Family A G protein-coupled receptor | 0 | 247 / 0Â Â Â Â Â | Cannabinodiol |
| Protein kinase C delta                                 | PRKCD                      | Q05655                     | CHEMBL2996    | Kinase                              | 0 | 19 / 0Â Â Â Â Â  | Cannabinodiol |
| Tyrosine-protein kinase Lyn                            | LYN                        | P07948                     | CHEMBL3905    | Kinase                              | 0 | 6 / 0Â Â Â Â Â   | Cannabinodiol |
| Protein kinase C theta                                 | PRKCQ                      | Q04759                     | CHEMBL3920    | Kinase                              | 0 | 35 / 0Â Â Â Â Â  | Cannabinodiol |
| Dual specificity protein phosphatase 3                 | DUSP3                      | P51452                     | CHEMBL2635    | Phosphatase                         | 0 | 4 / 0Â Â Â Â Â   | Cannabinodiol |

|                                                     |         |        |               |                                     |          |          |               |
|-----------------------------------------------------|---------|--------|---------------|-------------------------------------|----------|----------|---------------|
| Monoamine oxidase A                                 | MAOA    | P21397 | CHEMBL1951    | Oxidoreductase                      | 0        | 92 / 0   | Cannabinodiol |
| Adenosine A2a receptor                              | ADORA2A | P29274 | CHEMBL251     | Family A G protein-coupled receptor | 0        | 138 / 0  | Cannabinodiol |
| Adenosine A3 receptor                               | ADORA3  | P0DMS8 | CHEMBL256     | Family A G protein-coupled receptor | 0        | 177 / 0  | Cannabinodiol |
| Carbonic anhydrase I                                | CA1     | P00915 | CHEMBL261     | Lyase                               | 0        | 87 / 0   | Cannabinodiol |
| Carbonic anhydrase IX                               | CA9     | Q16790 | CHEMBL3594    | Lyase                               | 0        | 86 / 0   | Cannabinodiol |
| Androgen Receptor                                   | AR      | P10275 | CHEMBL1871    | Nuclear receptor                    | 0        | 73 / 0   | Cannabinodiol |
| Sodium channel protein type V alpha subunit         | SCN5A   | Q14524 | CHEMBL1980    | Voltage-gated ion channel           | 0        | 19 / 0   | Cannabinodiol |
| Carbonic anhydrase II                               | CA2     | P00918 | CHEMBL205     | Lyase                               | 0        | 110 / 0  | Cannabinodiol |
| Carbonic anhydrase XII                              | CA12    | O43570 | CHEMBL3242    | Lyase                               | 0        | 67 / 0   | Cannabinodiol |
|                                                     |         |        |               |                                     |          |          |               |
| Cannabinoid receptor 1                              | CNR1    | P21554 | CHEMBL218     | Family A G protein-coupled receptor | 0.986222 | 822 / 96 | Cannabinol    |
| Cannabinoid receptor 2                              | CNR2    | P34972 | CHEMBL253     | Family A G protein-coupled receptor | 0.986222 | 736 / 99 | Cannabinol    |
| Estrogen receptor beta                              | ESR2    | Q92731 | CHEMBL242     | Nuclear receptor                    | 0.101614 | 12 / 35  | Cannabinol    |
| Estrogen receptor alpha                             | ESR1    | P03372 | CHEMBL206     | Nuclear receptor                    | 0.101614 | 18 / 38  | Cannabinol    |
| N-arachidonyl glycine receptor                      | GPR18   | Q14330 | CHEMBL2384898 | Family A G protein-coupled receptor | 0.101614 | 2 / 0    | Cannabinol    |
| Vascular endothelial growth factor receptor 2       | KDR     | P35968 | CHEMBL279     | Kinase                              | 0.101614 | 229 / 0  | Cannabinol    |
| G-protein coupled receptor 55                       | GPR55   | Q9Y2T6 | CHEMBL1075322 | Family A G protein-coupled receptor | 0.101614 | 10 / 0   | Cannabinol    |
| Cystic fibrosis transmembrane conductance regulator | CFTR    | P13569 | CHEMBL4051    | Other ion channel                   | 0.101614 | 12 / 0   | Cannabinol    |
| 5-lipoxygenase activating protein                   | ALOX5AP | P20292 | CHEMBL4550    | Other cytosolic protein             | 0.101614 | 56 / 0   | Cannabinol    |
| Receptor protein-tyrosine kinase erbB-2             | ERBB2   | P04626 | CHEMBL1824    | Kinase                              | 0.101614 | 48 / 0   | Cannabinol    |
| Epidermal growth factor receptor erbB1              | EGFR    | P00533 | CHEMBL203     | Kinase                              | 0.101614 | 228 / 0  | Cannabinol    |

|                                                    |         |        |               |                                     |          |                  |            |
|----------------------------------------------------|---------|--------|---------------|-------------------------------------|----------|------------------|------------|
| Calcium sensing receptor                           | CASR    | P41180 | CHEMBL1878    | Family C G protein-coupled receptor | 0.101614 | 35 / 0Â Â Â Â Â  | Cannabinol |
| Corticotropin releasing factor receptor 1          | CRHR1   | P34998 | CHEMBL1800    | Family B G protein-coupled receptor | 0.101614 | 147 / 0Â Â Â Â Â | Cannabinol |
| 11-beta-hydroxysteroid dehydrogenase 1             | HSD11B1 | P28845 | CHEMBL4235    | Enzyme                              | 0.101614 | 213 / 0Â Â Â Â Â | Cannabinol |
| Phosphodiesterase 4B                               | PDE4B   | Q07343 | CHEMBL275     | Phosphodiesterase                   | 0.101614 | 36 / 0Â Â Â Â Â  | Cannabinol |
| NAD-dependent deacetylase sirtuin 2                | SIRT2   | Q8IXJ6 | CHEMBL4462    | Eraser                              | 0.101614 | 33 / 0Â Â Â Â Â  | Cannabinol |
| ADAMTS5                                            | ADAMTS5 | Q9UNA0 | CHEMBL2285    | Protease                            | 0.101614 | 36 / 0Â Â Â Â Â  | Cannabinol |
| Cathepsin D                                        | CTSD    | P07339 | CHEMBL2581    | Protease                            | 0.101614 | 41 / 0Â Â Â Â Â  | Cannabinol |
| Prenyl protein specific protease                   | RCE1    | Q9Y256 | CHEMBL3411    | Protease                            | 0.101614 | 6 / 0Â Â Â Â Â   | Cannabinol |
| Epoxide hydratase                                  | EPHX2   | P34913 | CHEMBL2409    | Protease                            | 0.101614 | 93 / 0Â Â Â Â Â  | Cannabinol |
| Adenosine A2a receptor                             | ADORA2A | P29274 | CHEMBL251     | Family A G protein-coupled receptor | 0.101614 | 184 / 0Â Â Â Â Â | Cannabinol |
| Adenosine A2b receptor                             | ADORA2B | P29275 | CHEMBL255     | Family A G protein-coupled receptor | 0.101614 | 40 / 0Â Â Â Â Â  | Cannabinol |
| Protoporphyrinogen oxidase                         | PPOX    | P50336 | CHEMBL1926488 | Oxidoreductase                      | 0.101614 | 1 / 0Â Â Â Â Â   | Cannabinol |
| Translocator protein (by homology)                 | TSPO    | P30536 | CHEMBL5742    | Membrane receptor                   | 0.101614 | 344 / 0Â Â Â Â Â | Cannabinol |
| Protein kinase C (PKC)                             | PRKCZ   | Q05513 | CHEMBL3438    | Kinase                              | 0.101614 | 2 / 0Â Â Â Â Â   | Cannabinol |
| Nitric oxide synthase, inducible (by homology)     | NOS2    | P35228 | CHEMBL4481    | Enzyme                              | 0.101614 | 83 / 0Â Â Â Â Â  | Cannabinol |
| Muscarinic acetylcholine receptor M1 (by homology) | CHRM1   | P11229 | CHEMBL216     | Family A G protein-coupled receptor | 0.101614 | 35 / 0Â Â Â Â Â  | Cannabinol |
| Isocitrate dehydrogenase [NADP] cytoplasmic        | IDH1    | O75874 | CHEMBL2007625 | Enzyme                              | 0.101614 | 170 / 0Â Â Â Â Â | Cannabinol |
| Bile acid receptor FXR                             | NR1H4   | Q96RI1 | CHEMBL2047    | Nuclear receptor                    | 0.101614 | 30 / 0Â Â Â Â Â  | Cannabinol |
| Thymidylate synthase                               | TYMS    | P04818 | CHEMBL1952    | Transferase                         | 0.101614 | 25 / 0Â Â Â Â Â  | Cannabinol |
| Melanocortin receptor 4                            | MC4R    | P32245 | CHEMBL259     | Family A G protein-coupled receptor | 0.101614 | 10 / 0Â Â Â Â Â  | Cannabinol |
| Acetylcholinesterase                               | ACHE    | P22303 | CHEMBL220     | Hydrolase                           | 0.101614 | 85 / 0Â Â Â Â Â  | Cannabinol |
| Neurokinin 2 receptor                              | TACR2   | P21452 | CHEMBL2327    | Family A G protein-                 | 0.101614 | 12 / 0Â Â Â Â Â  | Cannabinol |

|                                                        |         |        |               |                                               |          |                      |            |
|--------------------------------------------------------|---------|--------|---------------|-----------------------------------------------|----------|----------------------|------------|
|                                                        |         |        |               | coupled receptor                              |          |                      |            |
| Beta secretase 2                                       | BACE2   | Q9Y5Z0 | CHEMBL2525    | Protease                                      | 0.101614 | 64 /<br>0Â Â Â Â Â   | Cannabinol |
| Phosphodiesterase 7A                                   | PDE7A   | Q13946 | CHEMBL3012    | Phosphodies-<br>terase                        | 0.101614 | 15 /<br>0Â Â Â Â Â   | Cannabinol |
| Quinone reductase 2                                    | NQO2    | P16083 | CHEMBL3959    | Enzyme                                        | 0.101614 | 9 /<br>0Â Â Â Â Â    | Cannabinol |
| Neurokinin 3 receptor                                  | TACR3   | P29371 | CHEMBL4429    | Family A G<br>protein-<br>coupled<br>receptor | 0.101614 | 116 /<br>0Â Â Â Â Â  | Cannabinol |
| Kinesin-like protein 1                                 | KIF11   | P52732 | CHEMBL4581    | Other<br>cytosolic<br>protein                 | 0.101614 | 36 /<br>0Â Â Â Â Â   | Cannabinol |
| Cholecystokinin A receptor                             | CCKAR   | P32238 | CHEMBL1901    | Family A G<br>protein-<br>coupled<br>receptor | 0.101614 | 28 /<br>0Â Â Â Â Â   | Cannabinol |
| Interleukin-8 receptor B                               | CXCR2   | P25025 | CHEMBL2434    | Family A G<br>protein-<br>coupled<br>receptor | 0.101614 | 46 /<br>0Â Â Â Â Â   | Cannabinol |
| LDL-associated phospholipase A2                        | PLA2G7  | Q13093 | CHEMBL3514    | Enzyme                                        | 0.101614 | 20 /<br>0Â Â Â Â Â   | Cannabinol |
| G-protein coupled bile acid receptor 1                 | GPBAR1  | Q8TDU6 | CHEMBL5409    | Family A G<br>protein-<br>coupled<br>receptor | 0.101614 | 33 /<br>0Â Â Â Â Â   | Cannabinol |
| Dopamine D1 receptor                                   | DRD1    | P21728 | CHEMBL2056    | Family A G<br>protein-<br>coupled<br>receptor | 0.101614 | 22 /<br>0Â Â Â Â Â   | Cannabinol |
| 6-phosphofructo-2-kinase/fructose-2,6-bisphosphatase 3 | PFKFB3  | Q16875 | CHEMBL2331053 | Enzyme                                        | 0.101614 | 52 /<br>0Â Â Â Â Â   | Cannabinol |
| Poly [ADP-ribose] polymerase-1                         | PARP1   | P09874 | CHEMBL3105    | Enzyme                                        | 0.101614 | 22 /<br>0Â Â Â Â Â   | Cannabinol |
| Glucocorticoid receptor                                | NR3C1   | P04150 | CHEMBL2034    | Nuclear<br>receptor                           | 0.101614 | 126 /<br>53Â Â Â Â Â | Cannabinol |
| Methyl-CpG-binding protein 2                           | MECP2   | P51608 | CHEMBL3638346 | Reader                                        | 0.101614 | 1 /<br>0Â Â Â Â Â    | Cannabinol |
| Methyl-CpG-binding domain protein 2                    | MBD2    | Q9UBB5 | CHEMBL3707462 | Reader                                        | 0.101614 | 2 /<br>0Â Â Â Â Â    | Cannabinol |
| Serine/threonine-protein kinase PAK 1                  | PAK1    | Q13153 | CHEMBL4600    | Kinase                                        | 0.101614 | 2 /<br>0Â Â Â Â Â    | Cannabinol |
| Histone deacetylase 6                                  | HDAC6   | Q9UBN7 | CHEMBL1865    | Eraser                                        | 0.101614 | 26 /<br>0Â Â Â Â Â   | Cannabinol |
| Histone deacetylase 2                                  | HDAC2   | Q92769 | CHEMBL1937    | Eraser                                        | 0.101614 | 10 /<br>0Â Â Â Â Â   | Cannabinol |
| Estradiol 17-beta-dehydrogenase 2                      | HSD17B2 | P37059 | CHEMBL2789    | Enzyme                                        | 0.101614 | 20 /<br>0Â Â Â Â Â   | Cannabinol |
| Histone deacetylase 8                                  | HDAC8   | Q9BY41 | CHEMBL3192    | Eraser                                        | 0.101614 | 11 /<br>0Â Â Â Â Â   | Cannabinol |
| MAP kinase p38 alpha                                   | MAPK14  | Q16539 | CHEMBL260     | Kinase                                        | 0.101614 | 374 /<br>0Â Â Â Â Â  | Cannabinol |
| Prostanoid EP1 receptor                                | PTGER1  | P34995 | CHEMBL1811    | Family A G<br>protein-                        | 0        | 43 /<br>16Â Â Â Â Â  | Cannabinol |

|                                                     |         |        |               |                                            |   |         |            |
|-----------------------------------------------------|---------|--------|---------------|--------------------------------------------|---|---------|------------|
|                                                     |         |        |               | coupled receptor                           |   |         |            |
| Cytochrome b-c1 complex subunit 7                   | UQCRB   | P14927 | CHEMBL1671612 | Transmembrane 1-electron transfer carriers | 0 | 1 / 0   | Cannabinol |
| Serotonin 2c (5-HT2c) receptor                      | HTR2C   | P28335 | CHEMBL225     | Family A G protein-coupled receptor        | 0 | 41 / 0  | Cannabinol |
| Voltage-gated potassium channel subunit Kv1.5       | KCNA5   | P22460 | CHEMBL4306    | Voltage-gated ion channel                  | 0 | 111 / 0 | Cannabinol |
| Leukotriene A4 hydrolase                            | LTA4H   | P09960 | CHEMBL4618    | Protease                                   | 0 | 9 / 0   | Cannabinol |
| Peregrin                                            | BRPF1   | P55201 | CHEMBL3132741 | Reader                                     | 0 | 27 / 0  | Cannabinol |
| p53-binding protein Mdm-2                           | MDM2    | Q00987 | CHEMBL5023    | Other nuclear protein                      | 0 | 81 / 0  | Cannabinol |
| Bombesin receptor subtype-3                         | BRS3    | P32247 | CHEMBL4080    | Family A G protein-coupled receptor        | 0 | 1 / 0   | Cannabinol |
| Mu opioid receptor                                  | OPRM1   | P35372 | CHEMBL233     | Family A G protein-coupled receptor        | 0 | 18 / 0  | Cannabinol |
| Tyrosine-protein kinase LCK                         | LCK     | P06239 | CHEMBL258     | Kinase                                     | 0 | 62 / 0  | Cannabinol |
| Adenosine A1 receptor (by homology)                 | ADORA1  | P30542 | CHEMBL226     | Family A G protein-coupled receptor        | 0 | 287 / 0 | Cannabinol |
| Estradiol 17-beta-dehydrogenase 1                   | HSD17B1 | P14061 | CHEMBL3181    | Enzyme                                     | 0 | 10 / 0  | Cannabinol |
| Sodium channel protein type II alpha subunit        | SCN2A   | Q99250 | CHEMBL4187    | Voltage-gated ion channel                  | 0 | 25 / 0  | Cannabinol |
| Vanilloid receptor                                  | TRPV1   | Q8NER1 | CHEMBL4794    | Voltage-gated ion channel                  | 0 | 116 / 0 | Cannabinol |
| Egl nine homolog 1                                  | EGLN1   | Q9GZT9 | CHEMBL5697    | Oxidoreductase                             | 0 | 7 / 0   | Cannabinol |
| Tyrosine-protein kinase JAK3                        | JAK3    | P52333 | CHEMBL2148    | Kinase                                     | 0 | 209 / 0 | Cannabinol |
| Phosphodiesterase 2A                                | PDE2A   | O00408 | CHEMBL2652    | Phosphodiesterase                          | 0 | 56 / 0  | Cannabinol |
| Tyrosine-protein kinase JAK2                        | JAK2    | O60674 | CHEMBL2971    | Kinase                                     | 0 | 170 / 0 | Cannabinol |
| Calcium-activated potassium channel subunit alpha-1 | KCNMA1  | Q12791 | CHEMBL4304    | Voltage-gated ion channel                  | 0 | 13 / 0  | Cannabinol |
| Phosphodiesterase 10A                               | PDE10A  | Q9Y233 | CHEMBL4409    | Phosphodiesterase                          | 0 | 466 / 0 | Cannabinol |
| Muscarinic acetylcholine receptor M4                | CHRM4   | P08173 | CHEMBL1821    | Family A G protein-                        | 0 | 11 / 0  | Cannabinol |

|                                                       |                                 |                                      |               |                                     |   |         |            |
|-------------------------------------------------------|---------------------------------|--------------------------------------|---------------|-------------------------------------|---|---------|------------|
|                                                       |                                 |                                      |               | coupled receptor                    |   |         |            |
| Muscarinic acetylcholine receptor M5                  | CHRM5                           | P08912                               | CHEMBL2035    | Family A G protein-coupled receptor | 0 | 9 / 0   | Cannabinol |
| Muscarinic acetylcholine receptor M2                  | CHRM2                           | P08172                               | CHEMBL211     | Family A G protein-coupled receptor | 0 | 9 / 0   | Cannabinol |
| Muscarinic acetylcholine receptor M3                  | CHRM3                           | P20309                               | CHEMBL245     | Family A G protein-coupled receptor | 0 | 61 / 0  | Cannabinol |
| Neuropeptide Y receptor type 5                        | NPY5R                           | Q15761                               | CHEMBL4561    | Family A G protein-coupled receptor | 0 | 144 / 0 | Cannabinol |
| ATP-binding cassette sub-family G member 2            | ABCG2                           | Q9UNQ0                               | CHEMBL5393    | Primary active transporter          | 0 | 17 / 0  | Cannabinol |
| Glutamate NMDA receptor; GRIN1/GRIN2B                 | GRIN1<br>GRIN2B                 | Q05586<br>Q13224                     | CHEMBL1907603 | Ligand-gated ion channel            | 0 | 2 / 0   | Cannabinol |
| Adenosine A3 receptor                                 | ADORA3                          | P0DMS8                               | CHEMBL256     | Family A G protein-coupled receptor | 0 | 220 / 0 | Cannabinol |
| Cholecystokinin B receptor                            | CCKBR                           | P32239                               | CHEMBL298     | Family A G protein-coupled receptor | 0 | 266 / 0 | Cannabinol |
| Hormone sensitive lipase                              | LIPE                            | Q05469                               | CHEMBL3590    | Enzyme                              | 0 | 46 / 0  | Cannabinol |
| Cyclin-dependent kinase 5/CDK5 activator 1            | CDK5R1<br>CDK5                  | Q15078<br>Q00535                     | CHEMBL1907600 | Kinase                              | 0 | 85 / 0  | Cannabinol |
| Cyclin-dependent kinase 1/cyclin B                    | CCNB3<br>CDK1<br>CCNB1<br>CCNB2 | Q8WWL7<br>P06493<br>P14635<br>O95067 | CHEMBL2094127 | Other cytosolic protein             | 0 | 45 / 0  | Cannabinol |
| GABA-A receptor; GABA-A site (alpha1/beta2 interface) | GABRA1<br>GABRB2                | P14867<br>P47870                     | CHEMBL1907597 | Ligand-gated ion channel            | 0 | 5 / 0   | Cannabinol |
| Interleukin-8 receptor A                              | CXCR1                           | P25024                               | CHEMBL4029    | Family A G protein-coupled receptor | 0 | 11 / 0  | Cannabinol |
| Leucine-rich repeat serine/threonine-protein kinase 2 | LRRK2                           | Q5S007                               | CHEMBL1075104 | Kinase                              | 0 | 26 / 0  | Cannabinol |
| Sodium channel protein type V alpha subunit           | SCN5A                           | Q14524                               | CHEMBL1980    | Voltage-gated ion channel           | 0 | 19 / 0  | Cannabinol |
| GABA-A receptor; alpha-3/beta-3/gamma-2               | GABRB3<br>GABRA                 | P28472<br>P34903<br>P18507           | CHEMBL2094120 | Ligand-gated ion channel            | 0 | 85 / 0  | Cannabinol |

|                                                 |                                        |                            |               |                                               |          |                       |              |
|-------------------------------------------------|----------------------------------------|----------------------------|---------------|-----------------------------------------------|----------|-----------------------|--------------|
|                                                 | 3<br>GABRG<br>2                        |                            |               |                                               |          |                       |              |
| GABA-A receptor;<br>alpha-1/beta-<br>3/gamma-2  | GABRB<br>3<br>GABRG<br>2<br>GABRA<br>1 | P28472<br>P18507<br>P14867 | CHEMBL2094121 | Ligand-<br>gated ion<br>channel               | 0        | 73 /<br>0Â Â Â Â Â    | Cannabinol   |
| GABA-A receptor;<br>alpha-5/beta-<br>3/gamma-2  | GABRB<br>3<br>GABRG<br>2<br>GABRA<br>5 | P28472<br>P18507<br>P31644 | CHEMBL2094122 | Ligand-<br>gated ion<br>channel               | 0        | 75 /<br>0Â Â Â Â Â    | Cannabinol   |
| GABA-A receptor;<br>alpha-2/beta-<br>3/gamma-2  | GABRA<br>2<br>GABRB<br>3<br>GABRG<br>2 | P47869<br>P28472<br>P18507 | CHEMBL2094130 | Ligand-<br>gated ion<br>channel               | 0        | 79 /<br>0Â Â Â Â Â    | Cannabinol   |
| Matrix<br>metalloproteinase 9                   | MMP9                                   | P14780                     | CHEMBL321     | Protease                                      | 0        | 25 /<br>0Â Â Â Â Â    | Cannabinol   |
| Cathepsin (V and K)                             | CTSV                                   | O60911                     | CHEMBL3272    | Protease                                      | 0        | 17 /<br>0Â Â Â Â Â    | Cannabinol   |
| Matrix<br>metalloproteinase 2                   | MMP2                                   | P08253                     | CHEMBL333     | Protease                                      | 0        | 37 /<br>0Â Â Â Â Â    | Cannabinol   |
| FK506-binding<br>protein 1A                     | FKBP1A                                 | P62942                     | CHEMBL1902    | Isomerase                                     | 0        | 70 /<br>0Â Â Â Â Â    | Cannabinol   |
| Serine/threonine-<br>protein kinase<br>Aurora-B | AURKB                                  | Q96GD<br>4                 | CHEMBL2185    | Kinase                                        | 0        | 23 /<br>0Â Â Â Â Â    | Cannabinol   |
| Myosin light chain<br>kinase, smooth<br>muscle  | MYLK                                   | Q15746                     | CHEMBL2428    | Kinase                                        | 0        | 9 /<br>0Â Â Â Â Â     | Cannabinol   |
| Cannabinoid receptor<br>1                       | CNR1                                   | P21554                     | CHEMBL218     | Family A G<br>protein-<br>coupled<br>receptor | 0.431919 | 484 /<br>253Â Â Â Â Â | Cannabitroil |
| Cannabinoid receptor<br>2                       | CNR2                                   | P34972                     | CHEMBL253     | Family A G<br>protein-<br>coupled<br>receptor | 0.431919 | 424 /<br>224Â Â Â Â Â | Cannabitroil |
| Sulfonylurea receptor<br>2                      | ABCC9                                  | O60706                     | CHEMBL1971    | Primary<br>active<br>transporter              | 0.09724  | 39 /<br>0Â Â Â Â Â    | Cannabitroil |
| Anandamide<br>amidohydrolase                    | FAAH                                   | O00519                     | CHEMBL2243    | Enzyme                                        | 0.09724  | 71 /<br>0Â Â Â Â Â    | Cannabitroil |
| MAP kinase p38<br>alpha                         | MAPK1<br>4                             | Q16539                     | CHEMBL260     | Kinase                                        | 0.09724  | 454 /<br>0Â Â Â Â Â   | Cannabitroil |
| Tyrosine-protein<br>kinase ABL                  | ABL1                                   | P00519                     | CHEMBL1862    | Kinase                                        | 0.09724  | 149 /<br>0Â Â Â Â Â   | Cannabitroil |
| Tyrosine-protein<br>kinase FYN                  | FYN                                    | P06241                     | CHEMBL1841    | Kinase                                        | 0.09724  | 21 /<br>0Â Â Â Â Â    | Cannabitroil |
| Tyrosine-protein<br>kinase YES                  | YES1                                   | P07947                     | CHEMBL2073    | Kinase                                        | 0.09724  | 19 /<br>0Â Â Â Â Â    | Cannabitroil |
| Serine/threonine-<br>protein kinase<br>Aurora-B | AURKB                                  | Q96GD<br>4                 | CHEMBL2185    | Kinase                                        | 0.09724  | 222 /<br>0Â Â Â Â Â   | Cannabitroil |

|                                                      |                        |                            |               |                                                                     |         |                      |              |
|------------------------------------------------------|------------------------|----------------------------|---------------|---------------------------------------------------------------------|---------|----------------------|--------------|
| Serine/threonine-protein kinase Aurora-A             | AURKA                  | O14965                     | CHEMBL4722    | Kinase                                                              | 0.09724 | 342 /<br>0Â Â Â Â Â  | Cannabitrail |
| Cyclin-dependent kinase 4/cyclin D1                  | CCND1<br>CDK4          | P24385<br>P11802           | CHEMBL1907601 | Kinase                                                              | 0.09724 | 84 /<br>0Â Â Â Â Â   | Cannabitrail |
| Cyclin-dependent kinase 2/cyclin E                   | CCNE2<br>CDK2<br>CCNE1 | O96020<br>P24941<br>P24864 | CHEMBL2094126 | Other<br>cytosolic<br>protein                                       | 0.09724 | 109 /<br>0Â Â Â Â Â  | Cannabitrail |
| Phosphodiesterase 4B                                 | PDE4B                  | Q07343                     | CHEMBL275     | Phosphodies<br>terase                                               | 0.09724 | 107 /<br>0Â Â Â Â Â  | Cannabitrail |
| Cyclin-dependent kinase 2                            | CDK2                   | P24941                     | CHEMBL301     | Kinase                                                              | 0.09724 | 237 /<br>0Â Â Â Â Â  | Cannabitrail |
| Metabotropic glutamate receptor 5 (by homology)      | GRM5                   | P41594                     | CHEMBL3227    | Family C G<br>protein-<br>coupled<br>receptor                       | 0.09724 | 172 /<br>0Â Â Â Â Â  | Cannabitrail |
| PI3-kinase p110-alpha subunit                        | PIK3CA                 | P42336                     | CHEMBL4005    | Enzyme                                                              | 0.09724 | 1296 /<br>0Â Â Â Â Â | Cannabitrail |
| LDL-associated phospholipase A2                      | PLA2G7                 | Q13093                     | CHEMBL3514    | Enzyme                                                              | 0.09724 | 27 /<br>0Â Â Â Â Â   | Cannabitrail |
| Adenosine deaminase                                  | ADA                    | P00813                     | CHEMBL1910    | Hydrolase                                                           | 0.09724 | 34 /<br>0Â Â Â Â Â   | Cannabitrail |
| Protein kinase C gamma                               | PRKCG                  | P05129                     | CHEMBL2938    | Kinase                                                              | 0.09724 | 43 /<br>0Â Â Â Â Â   | Cannabitrail |
| Protein kinase C delta                               | PRKCD                  | Q05655                     | CHEMBL2996    | Kinase                                                              | 0.09724 | 121 /<br>0Â Â Â Â Â  | Cannabitrail |
| Protein kinase C alpha                               | PRKCA                  | P17252                     | CHEMBL299     | Kinase                                                              | 0.09724 | 229 /<br>0Â Â Â Â Â  | Cannabitrail |
| Protein kinase C beta                                | PRKCB                  | P05771                     | CHEMBL3045    | Kinase                                                              | 0.09724 | 63 /<br>0Â Â Â Â Â   | Cannabitrail |
| Protein kinase C (PKC)                               | PRKCZ                  | Q05513                     | CHEMBL3438    | Kinase                                                              | 0.09724 | 4 /<br>0Â Â Â Â Â    | Cannabitrail |
| Protein kinase C eta                                 | PRKCH                  | P24723                     | CHEMBL3616    | Kinase                                                              | 0.09724 | 31 /<br>0Â Â Â Â Â   | Cannabitrail |
| Voltage-gated calcium channel alpha2/delta subunit 1 | CACNA<br>2D1           | P54289                     | CHEMBL1919    | Calcium<br>channel<br>auxiliary<br>subunit<br>alpha2delta<br>family | 0.09724 | 8 /<br>0Â Â Â Â Â    | Cannabitrail |
| Voltage-gated calcium channel alpha2/delta subunit 2 | CACNA<br>2D2           | Q9NY4<br>7                 | CHEMBL3896    | Calcium<br>channel<br>auxiliary<br>subunit<br>alpha2delta<br>family | 0.09724 | 5 /<br>0Â Â Â Â Â    | Cannabitrail |
| Glycogen synthase kinase-3 beta                      | GSK3B                  | P49841                     | CHEMBL262     | Kinase                                                              | 0.09724 | 193 /<br>0Â Â Â Â Â  | Cannabitrail |
| Glycogen synthase kinase-3 alpha                     | GSK3A                  | P49840                     | CHEMBL2850    | Kinase                                                              | 0.09724 | 29 /<br>0Â Â Â Â Â   | Cannabitrail |
| Adenosine A2a receptor                               | ADORA<br>2A            | P29274                     | CHEMBL251     | Family A G<br>protein-<br>coupled<br>receptor                       | 0.09724 | 621 /<br>0Â Â Â Â Â  | Cannabitrail |
| Adenosine A2b receptor                               | ADORA<br>2B            | P29275                     | CHEMBL255     | Family A G<br>protein-<br>coupled<br>receptor                       | 0.09724 | 122 /<br>0Â Â Â Â Â  | Cannabitrail |



|                                                       |                |                  |               |                         |         |                      |              |
|-------------------------------------------------------|----------------|------------------|---------------|-------------------------|---------|----------------------|--------------|
| Tyrosine-protein kinase SYK                           | SYK            | P43405           | CHEMBL2599    | Kinase                  | 0.09724 | 499 /<br>0Â Â Â Â Â  | Cannabitrail |
| Tyrosine-protein kinase JAK3                          | JAK3           | P52333           | CHEMBL2148    | Kinase                  | 0.09724 | 300 /<br>0Â Â Â Â Â  | Cannabitrail |
| Phosphodiesterase 10A                                 | PDE10A         | Q9Y233           | CHEMBL4409    | Phosphodiesterase       | 0.09724 | 1032 /<br>0Â Â Â Â Â | Cannabitrail |
| Tyrosine-protein kinase receptor FLT3                 | FLT3           | P36888           | CHEMBL1974    | Kinase                  | 0.09724 | 161 /<br>0Â Â Â Â Â  | Cannabitrail |
| Tyrosine-protein kinase LCK                           | LCK            | P06239           | CHEMBL258     | Kinase                  | 0.09724 | 97 /<br>0Â Â Â Â Â   | Cannabitrail |
| Tyrosine-protein kinase HCK                           | HCK            | P08631           | CHEMBL3234    | Kinase                  | 0.09724 | 33 /<br>0Â Â Â Â Â   | Cannabitrail |
| Tyrosine-protein kinase Lyn                           | LYN            | P07948           | CHEMBL3905    | Kinase                  | 0.09724 | 23 /<br>0Â Â Â Â Â   | Cannabitrail |
| Tyrosine-protein kinase FGR                           | FGR            | P09769           | CHEMBL4454    | Kinase                  | 0.09724 | 11 /<br>0Â Â Â Â Â   | Cannabitrail |
| Ephrin type-A receptor 3                              | EPHA3          | P29320           | CHEMBL4954    | Kinase                  | 0.09724 | 9 /<br>0Â Â Â Â Â    | Cannabitrail |
| Discoidin domain-containing receptor 2                | DDR2           | Q16832           | CHEMBL5122    | Kinase                  | 0.09724 | 8 /<br>0Â Â Â Â Â    | Cannabitrail |
| Tyrosine-protein kinase BTK                           | BTK            | Q06187           | CHEMBL5251    | Kinase                  | 0.09724 | 67 /<br>0Â Â Â Â Â   | Cannabitrail |
| Epithelial discoidin domain-containing receptor 1     | DDR1           | Q08345           | CHEMBL5319    | Kinase                  | 0.09724 | 12 /<br>0Â Â Â Â Â   | Cannabitrail |
| Cyclin-dependent kinase 5/CDK5 activator 1            | CDK5R1<br>CDK5 | Q15078<br>Q00535 | CHEMBL1907600 | Kinase                  | 0.09724 | 133 /<br>0Â Â Â Â Â  | Cannabitrail |
| Casein kinase I gamma 2                               | CSNK1G2        | P78368           | CHEMBL2543    | Kinase                  | 0.09724 | 5 /<br>0Â Â Â Â Â    | Cannabitrail |
| Casein kinase I alpha                                 | CSNK1A1        | P48729           | CHEMBL2793    | Kinase                  | 0.09724 | 15 /<br>0Â Â Â Â Â   | Cannabitrail |
| Matrix metalloproteinase 13                           | MMP13          | P45452           | CHEMBL280     | Protease                | 0.09724 | 386 /<br>0Â Â Â Â Â  | Cannabitrail |
| Casein kinase I delta                                 | CSNK1D         | P48730           | CHEMBL2828    | Kinase                  | 0.09724 | 15 /<br>0Â Â Â Â Â   | Cannabitrail |
| Heat shock protein HSP 90-beta                        | HSP90AB1       | P08238           | CHEMBL4303    | Other cytosolic protein | 0.09724 | 62 /<br>0Â Â Â Â Â   | Cannabitrail |
| Leucine-rich repeat serine/threonine-protein kinase 2 | LRRK2          | Q5S007           | CHEMBL1075104 | Kinase                  | 0.09724 | 188 /<br>0Â Â Â Â Â  | Cannabitrail |
| G protein-coupled receptor kinase 7                   | GRK7           | Q8WTQ7           | CHEMBL1075133 | Kinase                  | 0.09724 | 5 /<br>0Â Â Â Â Â    | Cannabitrail |
| Serine/threonine-protein kinase 38                    | STK38          | Q15208           | CHEMBL1075155 | Kinase                  | 0.09724 | 3 /<br>0Â Â Â Â Â    | Cannabitrail |
| Homeodomain-interacting protein kinase 4              | HIPK4          | Q8NE63           | CHEMBL1075167 | Kinase                  | 0.09724 | 8 /<br>0Â Â Â Â Â    | Cannabitrail |
| Serine/threonine-protein kinase TAO2                  | TAOK2          | Q9UL54           | CHEMBL1075195 | Kinase                  | 0.09724 | 3 /<br>0Â Â Â Â Â    | Cannabitrail |
| Serine/threonine-protein kinase/endoribonuclease IRE1 | ERN1           | O75460           | CHEMBL1163101 | Enzyme                  | 0.09724 | 14 /<br>0Â Â Â Â Â   | Cannabitrail |
| Serine/threonine-protein kinase OSR1                  | OXSRI          | O95747           | CHEMBL1163104 | Kinase                  | 0.09724 | 4 /<br>0Â Â Â Â Â    | Cannabitrail |
| Serine/threonine-protein kinase MAK                   | MAK            | P20794           | CHEMBL1163106 | Kinase                  | 0.09724 | 2 /<br>0Â Â Â Â Â    | Cannabitrail |

|                                                                              |         |        |               |                       |         |                                                 |              |
|------------------------------------------------------------------------------|---------|--------|---------------|-----------------------|---------|-------------------------------------------------|--------------|
| STE20/SPS1-related proline-alanine-rich protein kinase                       | STK39   | Q9UEW8 | CHEMBL1163108 | Kinase                | 0.09724 | $\frac{3}{0 \hat{A} \hat{A} \hat{A} \hat{A}}$   | Cannabitrail |
| Cyclin-dependent kinase-like 5                                               | CDKL5   | O76039 | CHEMBL1163112 | Kinase                | 0.09724 | $\frac{3}{0 \hat{A} \hat{A} \hat{A} \hat{A}}$   | Cannabitrail |
| Cyclin-dependent kinase-like 3                                               | CDKL3   | Q8IVW4 | CHEMBL1163117 | Kinase                | 0.09724 | $\frac{2}{0 \hat{A} \hat{A} \hat{A} \hat{A}}$   | Cannabitrail |
| U4/U6 small nuclear ribonucleoprotein Prp4                                   | PRPF4   | O43172 | CHEMBL1163119 | Other nuclear protein | 0.09724 | $\frac{1}{0 \hat{A} \hat{A} \hat{A} \hat{A}}$   | Cannabitrail |
| Phosphatidylinositol-4-phosphate 3-kinase C2 domain-containing subunit gamma | PIK3C2G | O75747 | CHEMBL1163120 | Enzyme                | 0.09724 | $\frac{8}{0 \hat{A} \hat{A} \hat{A} \hat{A}}$   | Cannabitrail |
| Mitogen-activated protein kinase kinase kinase 6                             | MAP3K6  | O95382 | CHEMBL1163123 | Kinase                | 0.09724 | $\frac{2}{0 \hat{A} \hat{A} \hat{A} \hat{A}}$   | Cannabitrail |
| Mitogen-activated protein kinase kinase kinase 13                            | MAP3K13 | O43283 | CHEMBL1163124 | Kinase                | 0.09724 | $\frac{3}{0 \hat{A} \hat{A} \hat{A} \hat{A}}$   | Cannabitrail |
| Serine/threonine-protein kinase ICK                                          | ICK     | Q9UPZ9 | CHEMBL1163126 | Kinase                | 0.09724 | $\frac{5}{0 \hat{A} \hat{A} \hat{A} \hat{A}}$   | Cannabitrail |
| Mitogen-activated protein kinase kinase kinase 15                            | MAP3K15 | Q6ZN16 | CHEMBL1163127 | Kinase                | 0.09724 | $\frac{3}{0 \hat{A} \hat{A} \hat{A} \hat{A}}$   | Cannabitrail |
| Microtubule-associated serine/threonine-protein kinase 1                     | MAST1   | Q9Y2H9 | CHEMBL1163128 | Kinase                | 0.09724 | $\frac{3}{0 \hat{A} \hat{A} \hat{A} \hat{A}}$   | Cannabitrail |
| Serine/threonine-protein kinase SBK1                                         | SBK1    | Q52WX2 | CHEMBL1163129 | Kinase                | 0.09724 | $\frac{4}{0 \hat{A} \hat{A} \hat{A} \hat{A}}$   | Cannabitrail |
| Hormonally up-regulated neu tumor-associated kinase                          | HUNK    | P57058 | CHEMBL1795165 | Enzyme                | 0.09724 | $\frac{4}{0 \hat{A} \hat{A} \hat{A} \hat{A}}$   | Cannabitrail |
| Cyclin-dependent kinase 13                                                   | CDK13   | Q14004 | CHEMBL1795192 | Enzyme                | 0.09724 | $\frac{4}{0 \hat{A} \hat{A} \hat{A} \hat{A}}$   | Cannabitrail |
| Macrophage colony stimulating factor receptor                                | CSF1R   | P07333 | CHEMBL1844    | Kinase                | 0.09724 | $\frac{113}{0 \hat{A} \hat{A} \hat{A} \hat{A}}$ | Cannabitrail |
| Vascular endothelial growth factor receptor 1                                | FLT1    | P17948 | CHEMBL1868    | Kinase                | 0.09724 | $\frac{53}{0 \hat{A} \hat{A} \hat{A} \hat{A}}$  | Cannabitrail |
| Peripheral plasma membrane protein CASK                                      | CASK    | O14936 | CHEMBL1908381 | Enzyme                | 0.09724 | $\frac{2}{0 \hat{A} \hat{A} \hat{A} \hat{A}}$   | Cannabitrail |
| Serine/threonine-protein kinase PRP4 homolog                                 | PRPF4B  | Q13523 | CHEMBL1908382 | Enzyme                | 0.09724 | $\frac{4}{0 \hat{A} \hat{A} \hat{A} \hat{A}}$   | Cannabitrail |
| Dual serine/threonine and tyrosine protein kinase                            | DSTYK   | Q6XUX3 | CHEMBL1908386 | Enzyme                | 0.09724 | $\frac{3}{0 \hat{A} \hat{A} \hat{A} \hat{A}}$   | Cannabitrail |
| Mitogen-activated protein kinase kinase kinase 12                            | MAP3K12 | Q12852 | CHEMBL1908389 | Enzyme                | 0.09724 | $\frac{95}{0 \hat{A} \hat{A} \hat{A} \hat{A}}$  | Cannabitrail |
| Platelet-derived growth factor receptor beta                                 | PDGFRB  | P09619 | CHEMBL1913    | Kinase                | 0.09724 | $\frac{56}{0 \hat{A} \hat{A} \hat{A} \hat{A}}$  | Cannabitrail |

|                                                               |                                 |                                          |               |                         |         |                     |              |
|---------------------------------------------------------------|---------------------------------|------------------------------------------|---------------|-------------------------|---------|---------------------|--------------|
| Vascular endothelial growth factor receptor 3                 | FLT4                            | P35916                                   | CHEMBL1955    | Kinase                  | 0.09724 | 39 /<br>0Â Â Â Â Â  | Cannabitrail |
| Insulin-like growth factor I receptor                         | IGF1R                           | P08069                                   | CHEMBL1957    | Kinase                  | 0.09724 | 226 /<br>0Â Â Â Â Â | Cannabitrail |
| Insulin receptor                                              | INSR                            | P06213                                   | CHEMBL1981    | Kinase                  | 0.09724 | 41 /<br>0Â Â Â Â Â  | Cannabitrail |
| Platelet-derived growth factor receptor alpha                 | PDGFR A                         | P16234                                   | CHEMBL2007    | Kinase                  | 0.09724 | 17 /<br>0Â Â Â Â Â  | Cannabitrail |
| Epidermal growth factor receptor erbB1                        | EGFR                            | P00533                                   | CHEMBL203     | Kinase                  | 0.09724 | 531 /<br>0Â Â Â Â Â | Cannabitrail |
| Kinesin-1 heavy chain/ Tyrosine-protein kinase receptor RET   | RET                             | P07949                                   | CHEMBL2041    | Kinase                  | 0.09724 | 40 /<br>0Â Â Â Â Â  | Cannabitrail |
| Ephrin type-A receptor 2                                      | EPHA2                           | P29317                                   | CHEMBL2068    | Kinase                  | 0.09724 | 21 /<br>0Â Â Â Â Â  | Cannabitrail |
| Cyclin-dependent kinase 1/cyclin B                            | CCNB3<br>CDK1<br>CCNB1<br>CCNB2 | Q8WW<br>L7<br>P06493<br>P14635<br>O95067 | CHEMBL2094127 | Other cytosolic protein | 0.09724 | 47 /<br>0Â Â Â Â Â  | Cannabitrail |
| Dual specificity mitogen-activated protein kinase kinase 3    | MAP2K 3                         | P46734                                   | CHEMBL2109    | Kinase                  | 0.09724 | 3 /<br>0Â Â Â Â Â   | Cannabitrail |
| AMP-activated protein kinase, alpha-2 subunit                 | PRKAA 2                         | P54646                                   | CHEMBL2116    | Kinase                  | 0.09724 | 3 /<br>0Â Â Â Â Â   | Cannabitrail |
| Serine/threonine-protein kinase PIM1                          | PIM1                            | P11309                                   | CHEMBL2147    | Kinase                  | 0.09724 | 217 /<br>0Â Â Â Â Â | Cannabitrail |
| Dual specificity mitogen-activated protein kinase kinase 6    | MAP2K 6                         | P52564                                   | CHEMBL2171    | Kinase                  | 0.09724 | 4 /<br>0Â Â Â Â Â   | Cannabitrail |
| MAP kinase-activated protein kinase 2                         | MAPKA PK2                       | P49137                                   | CHEMBL2208    | Kinase                  | 0.09724 | 52 /<br>0Â Â Â Â Â  | Cannabitrail |
| Tyrosine-protein kinase BLK                                   | BLK                             | P51451                                   | CHEMBL2250    | Kinase                  | 0.09724 | 11 /<br>0Â Â Â Â Â  | Cannabitrail |
| c-Jun N-terminal kinase 1                                     | MAPK8                           | P45983                                   | CHEMBL2276    | Kinase                  | 0.09724 | 156 /<br>0Â Â Â Â Â | Cannabitrail |
| Dual-specificity tyrosine-phosphorylation regulated kinase 1A | DYRK1 A                         | Q13627                                   | CHEMBL2292    | Kinase                  | 0.09724 | 93 /<br>0Â Â Â Â Â  | Cannabitrail |
| Ribosomal protein S6 kinase alpha 3                           | RPS6KA 3                        | P51812                                   | CHEMBL2345    | Kinase                  | 0.09724 | 17 /<br>0Â Â Â Â Â  | Cannabitrail |
| Phosphorylase kinase gamma subunit 2                          | PHKG2                           | P15735                                   | CHEMBL2349    | Kinase                  | 0.09724 | 4 /<br>0Â Â Â Â Â   | Cannabitrail |
| Myosin light chain kinase, smooth muscle                      | MYLK                            | Q15746                                   | CHEMBL2428    | Kinase                  | 0.09724 | 14 /<br>0Â Â Â Â Â  | Cannabitrail |
| Serine/threonine-protein kinase AKT2                          | AKT2                            | P31751                                   | CHEMBL2431    | Kinase                  | 0.09724 | 11 /<br>0Â Â Â Â Â  | Cannabitrail |
| Death-associated protein kinase 3                             | DAPK3                           | O43293                                   | CHEMBL2468    | Kinase                  | 0.09724 | 8 /<br>0Â Â Â Â Â   | Cannabitrail |

|                                                     |         |        |               |                                     |          |                                                  |              |
|-----------------------------------------------------|---------|--------|---------------|-------------------------------------|----------|--------------------------------------------------|--------------|
| CaM kinase I alpha                                  | CAMK1   | Q14012 | CHEMBL2493    | Kinase                              | 0.09724  | $\frac{6}{0 \hat{A} \hat{A} \hat{A} \hat{A}}$    | Cannabitroil |
| CaM kinase IV                                       | CAMK4   | Q16566 | CHEMBL2494    | Kinase                              | 0.09724  | $\frac{3}{0 \hat{A} \hat{A} \hat{A} \hat{A}}$    | Cannabitroil |
| Serine/threonine-protein kinase Chk2                | CHEK2   | O96017 | CHEMBL2527    | Kinase                              | 0.09724  | $\frac{16}{0 \hat{A} \hat{A} \hat{A} \hat{A}}$   | Cannabitroil |
| Cannabinoid receptor 1                              | CNR1    | P21554 | CHEMBL218     | Family A G protein-coupled receptor | 0.65802  | $\frac{588}{50 \hat{A} \hat{A} \hat{A} \hat{A}}$ | Cannabivarin |
| Cannabinoid receptor 2                              | CNR2    | P34972 | CHEMBL253     | Family A G protein-coupled receptor | 0.592071 | $\frac{493}{55 \hat{A} \hat{A} \hat{A} \hat{A}}$ | Cannabivarin |
| Estrogen receptor beta                              | ESR2    | Q92731 | CHEMBL242     | Nuclear receptor                    | 0.1061   | $\frac{12}{20 \hat{A} \hat{A} \hat{A} \hat{A}}$  | Cannabivarin |
| Estrogen receptor alpha                             | ESR1    | P03372 | CHEMBL206     | Nuclear receptor                    | 0.1061   | $\frac{14}{22 \hat{A} \hat{A} \hat{A} \hat{A}}$  | Cannabivarin |
| Vascular endothelial growth factor receptor 2       | KDR     | P35968 | CHEMBL279     | Kinase                              | 0.097875 | $\frac{203}{0 \hat{A} \hat{A} \hat{A} \hat{A}}$  | Cannabivarin |
| N-arachidonyl glycine receptor                      | GPR18   | Q14330 | CHEMBL2384898 | Family A G protein-coupled receptor | 0.097875 | $\frac{2}{0 \hat{A} \hat{A} \hat{A} \hat{A}}$    | Cannabivarin |
| Glycine receptor subunit alpha-1                    | GLRA1   | P23415 | CHEMBL5845    | Ligand-gated ion channel            | 0.097875 | $\frac{1}{0 \hat{A} \hat{A} \hat{A} \hat{A}}$    | Cannabivarin |
| Glucagon receptor                                   | GCGR    | P47871 | CHEMBL1985    | Family B G protein-coupled receptor | 0.097875 | $\frac{22}{0 \hat{A} \hat{A} \hat{A} \hat{A}}$   | Cannabivarin |
| Phosphodiesterase 4B                                | PDE4B   | Q07343 | CHEMBL275     | Phosphodiesterase                   | 0.097875 | $\frac{32}{0 \hat{A} \hat{A} \hat{A} \hat{A}}$   | Cannabivarin |
| Receptor protein-tyrosine kinase erbB-2             | ERBB2   | P04626 | CHEMBL1824    | Kinase                              | 0.097875 | $\frac{49}{0 \hat{A} \hat{A} \hat{A} \hat{A}}$   | Cannabivarin |
| Epidermal growth factor receptor erbB1              | EGFR    | P00533 | CHEMBL203     | Kinase                              | 0.097875 | $\frac{269}{0 \hat{A} \hat{A} \hat{A} \hat{A}}$  | Cannabivarin |
| Cystic fibrosis transmembrane conductance regulator | CFTR    | P13569 | CHEMBL4051    | Other ion channel                   | 0.097875 | $\frac{2}{0 \hat{A} \hat{A} \hat{A} \hat{A}}$    | Cannabivarin |
| 11-beta-hydroxysteroid dehydrogenase 1              | HSD11B1 | P28845 | CHEMBL4235    | Enzyme                              | 0.097875 | $\frac{199}{0 \hat{A} \hat{A} \hat{A} \hat{A}}$  | Cannabivarin |
| Interleukin-8 receptor B                            | CXCR2   | P25025 | CHEMBL2434    | Family A G protein-coupled receptor | 0.097875 | $\frac{39}{0 \hat{A} \hat{A} \hat{A} \hat{A}}$   | Cannabivarin |
| Serine/threonine-protein kinase PAK 1               | PAK1    | Q13153 | CHEMBL4600    | Kinase                              | 0.097875 | $\frac{1}{0 \hat{A} \hat{A} \hat{A} \hat{A}}$    | Cannabivarin |
| Histone deacetylase 6                               | HDAC6   | Q9UBN7 | CHEMBL1865    | Eraser                              | 0.097875 | $\frac{21}{0 \hat{A} \hat{A} \hat{A} \hat{A}}$   | Cannabivarin |
| Histone deacetylase 8                               | HDAC8   | Q9BY41 | CHEMBL3192    | Eraser                              | 0.097875 | $\frac{10}{0 \hat{A} \hat{A} \hat{A} \hat{A}}$   | Cannabivarin |
| Estradiol 17-beta-dehydrogenase 3                   | HSD17B3 | P37058 | CHEMBL4234    | Enzyme                              | 0.097875 | $\frac{6}{0 \hat{A} \hat{A} \hat{A} \hat{A}}$    | Cannabivarin |

|                                                     |                                 |                                      |               |                                     |          |                                                          |              |
|-----------------------------------------------------|---------------------------------|--------------------------------------|---------------|-------------------------------------|----------|----------------------------------------------------------|--------------|
| Epoxide hydratase                                   | EPHX2                           | P34913                               | CHEMBL2409    | Protease                            | 0.097875 | $\frac{64}{0 \hat{A} \hat{A} \hat{A} \hat{A} \hat{A}}$   | Cannabivarin |
| Melanocortin receptor 4                             | MC4R                            | P32245                               | CHEMBL259     | Family A G protein-coupled receptor | 0.097875 | $\frac{9}{0 \hat{A} \hat{A} \hat{A} \hat{A} \hat{A}}$    | Cannabivarin |
| G-protein coupled receptor 55                       | GPR55                           | Q9Y2T6                               | CHEMBL1075322 | Family A G protein-coupled receptor | 0.097875 | $\frac{10}{0 \hat{A} \hat{A} \hat{A} \hat{A} \hat{A}}$   | Cannabivarin |
| Cathepsin D                                         | CTSD                            | P07339                               | CHEMBL2581    | Protease                            | 0.097875 | $\frac{25}{0 \hat{A} \hat{A} \hat{A} \hat{A} \hat{A}}$   | Cannabivarin |
| Poly [ADP-ribose] polymerase-1                      | PARP1                           | P09874                               | CHEMBL3105    | Enzyme                              | 0.097875 | $\frac{16}{0 \hat{A} \hat{A} \hat{A} \hat{A} \hat{A}}$   | Cannabivarin |
| Calcium-activated potassium channel subunit alpha-1 | KCNMA1                          | Q12791                               | CHEMBL4304    | Voltage-gated ion channel           | 0.097875 | $\frac{11}{0 \hat{A} \hat{A} \hat{A} \hat{A} \hat{A}}$   | Cannabivarin |
| NAD-dependent deacetylase sirtuin 2                 | SIRT2                           | Q8IXJ6                               | CHEMBL4462    | Eraser                              | 0.097875 | $\frac{19}{0 \hat{A} \hat{A} \hat{A} \hat{A} \hat{A}}$   | Cannabivarin |
| Prostanoid EP1 receptor                             | PTGER1                          | P34995                               | CHEMBL1811    | Family A G protein-coupled receptor | 0.097875 | $\frac{22}{16 \hat{A} \hat{A} \hat{A} \hat{A} \hat{A}}$  | Cannabivarin |
| Cyclin-dependent kinase 5/CDK5 activator 1          | CDK5R1<br>CDK5                  | Q15078<br>Q00535                     | CHEMBL1907600 | Kinase                              | 0.097875 | $\frac{73}{0 \hat{A} \hat{A} \hat{A} \hat{A} \hat{A}}$   | Cannabivarin |
| Cyclin-dependent kinase 1/cyclin B                  | CCNB3<br>CDK1<br>CCNB1<br>CCNB2 | Q8WWL7<br>P06493<br>P14635<br>O95067 | CHEMBL2094127 | Other cytosolic protein             | 0.097875 | $\frac{42}{0 \hat{A} \hat{A} \hat{A} \hat{A} \hat{A}}$   | Cannabivarin |
| Prenyl protein specific protease                    | RCE1                            | Q9Y256                               | CHEMBL3411    | Protease                            | 0.097875 | $\frac{6}{0 \hat{A} \hat{A} \hat{A} \hat{A} \hat{A}}$    | Cannabivarin |
| Sodium channel protein type II alpha subunit        | SCN2A                           | Q99250                               | CHEMBL4187    | Voltage-gated ion channel           | 0.097875 | $\frac{24}{0 \hat{A} \hat{A} \hat{A} \hat{A} \hat{A}}$   | Cannabivarin |
| Glucocorticoid receptor                             | NR3C1                           | P04150                               | CHEMBL2034    | Nuclear receptor                    | 0.097875 | $\frac{100}{54 \hat{A} \hat{A} \hat{A} \hat{A} \hat{A}}$ | Cannabivarin |
| Serine/threonine-protein kinase Aurora-B            | AURKB                           | Q96GD4                               | CHEMBL2185    | Kinase                              | 0.097875 | $\frac{21}{0 \hat{A} \hat{A} \hat{A} \hat{A} \hat{A}}$   | Cannabivarin |
| Serine/threonine-protein kinase Aurora-C            | AURKC                           | Q9UQB9                               | CHEMBL3935    | Kinase                              | 0.097875 | $\frac{11}{0 \hat{A} \hat{A} \hat{A} \hat{A} \hat{A}}$   | Cannabivarin |
| Serine/threonine-protein kinase Aurora-A            | AURKA                           | O14965                               | CHEMBL4722    | Kinase                              | 0.097875 | $\frac{26}{0 \hat{A} \hat{A} \hat{A} \hat{A} \hat{A}}$   | Cannabivarin |
| Translocator protein (by homology)                  | TSPO                            | P30536                               | CHEMBL5742    | Membrane receptor                   | 0.097875 | $\frac{308}{0 \hat{A} \hat{A} \hat{A} \hat{A} \hat{A}}$  | Cannabivarin |
| ATP-binding cassette sub-family G member 2          | ABCG2                           | Q9UNQ0                               | CHEMBL5393    | Primary active transporter          | 0.097875 | $\frac{15}{0 \hat{A} \hat{A} \hat{A} \hat{A} \hat{A}}$   | Cannabivarin |
| LDL-associated phospholipase A2                     | PLA2G7                          | Q13093                               | CHEMBL3514    | Enzyme                              | 0.097875 | $\frac{14}{0 \hat{A} \hat{A} \hat{A} \hat{A} \hat{A}}$   | Cannabivarin |
| Protein kinase C (PKC)                              | PRKCZ                           | Q05513                               | CHEMBL3438    | Kinase                              | 0.097875 | $\frac{2}{0 \hat{A} \hat{A} \hat{A} \hat{A} \hat{A}}$    | Cannabivarin |
| Nitric oxide synthase, inducible (by homology)      | NOS2                            | P35228                               | CHEMBL4481    | Enzyme                              | 0.097875 | $\frac{78}{0 \hat{A} \hat{A} \hat{A} \hat{A} \hat{A}}$   | Cannabivarin |

|                                               |          |        |               |                                     |          |                  |              |
|-----------------------------------------------|----------|--------|---------------|-------------------------------------|----------|------------------|--------------|
| Corticotropin releasing factor receptor 1     | CRHR1    | P34998 | CHEMBL1800    | Family B G protein-coupled receptor | 0.097875 | 68 / 0Â Â Â Â Â  | Cannabivarin |
| Thymidylate synthase                          | TYMS     | P04818 | CHEMBL1952    | Transferase                         | 0.097875 | 24 / 0Â Â Â Â Â  | Cannabivarin |
| Quinone reductase 2                           | NQO2     | P16083 | CHEMBL3959    | Enzyme                              | 0.097875 | 8 / 0Â Â Â Â Â   | Cannabivarin |
| 5-lipoxygenase activating protein             | ALOX5 AP | P20292 | CHEMBL4550    | Other cytosolic protein             | 0.097875 | 37 / 0Â Â Â Â Â  | Cannabivarin |
| Gonadotropin-releasing hormone receptor       | GNRHR    | P30968 | CHEMBL1855    | Family A G protein-coupled receptor | 0.097875 | 7 / 0Â Â Â Â Â   | Cannabivarin |
| Estradiol 17-beta-dehydrogenase 2             | HSD17B 2 | P37059 | CHEMBL2789    | Enzyme                              | 0.097875 | 19 / 0Â Â Â Â Â  | Cannabivarin |
| Bombesin receptor subtype-3                   | BRS3     | P32247 | CHEMBL4080    | Family A G protein-coupled receptor | 0.097875 | 1 / 0Â Â Â Â Â   | Cannabivarin |
| Anandamide amidohydrolase                     | FAAH     | O00519 | CHEMBL2243    | Enzyme                              | 0        | 38 / 0Â Â Â Â Â  | Cannabivarin |
| Serotonin 2c (5-HT2c) receptor                | HTR2C    | P28335 | CHEMBL225     | Family A G protein-coupled receptor | 0        | 38 / 0Â Â Â Â Â  | Cannabivarin |
| Protoporphyrinogen oxidase                    | PPOX     | P50336 | CHEMBL1926488 | Oxidoreductase                      | 0        | 1 / 0Â Â Â Â Â   | Cannabivarin |
| Voltage-gated potassium channel subunit Kv1.5 | KCNA5    | P22460 | CHEMBL4306    | Voltage-gated ion channel           | 0        | 84 / 0Â Â Â Â Â  | Cannabivarin |
| Acetylcholinesterase                          | ACHE     | P22303 | CHEMBL220     | Hydrolase                           | 0        | 66 / 0Â Â Â Â Â  | Cannabivarin |
| Adenosine A1 receptor (by homology)           | ADORA 1  | P30542 | CHEMBL226     | Family A G protein-coupled receptor | 0        | 232 / 0Â Â Â Â Â | Cannabivarin |
| Beta secretase 2                              | BACE2    | Q9Y5Z0 | CHEMBL2525    | Protease                            | 0        | 43 / 0Â Â Â Â Â  | Cannabivarin |
| Tyrosine-protein kinase JAK3                  | JAK3     | P52333 | CHEMBL2148    | Kinase                              | 0        | 196 / 0Â Â Â Â Â | Cannabivarin |
| Tyrosine-protein kinase JAK2                  | JAK2     | O60674 | CHEMBL2971    | Kinase                              | 0        | 172 / 0Â Â Â Â Â | Cannabivarin |
| Tyrosine-protein kinase receptor FLT3         | FLT3     | P36888 | CHEMBL1974    | Kinase                              | 0        | 35 / 0Â Â Â Â Â  | Cannabivarin |
| Histone deacetylase 2                         | HDAC2    | Q92769 | CHEMBL1937    | Eraser                              | 0        | 11 / 0Â Â Â Â Â  | Cannabivarin |
| Kinesin-like protein 1                        | KIF11    | P52732 | CHEMBL4581    | Other cytosolic protein             | 0        | 33 / 0Â Â Â Â Â  | Cannabivarin |
| G-protein coupled bile acid receptor 1        | GPBAR1   | Q8TDU6 | CHEMBL5409    | Family A G protein-coupled receptor | 0        | 20 / 0Â Â Â Â Â  | Cannabivarin |
| Adenosine A3 receptor                         | ADORA 3  | P0DMS8 | CHEMBL256     | Family A G protein-coupled receptor | 0        | 156 / 0Â Â Â Â Â | Cannabivarin |

|                                                                             |         |        |               |                                            |   |         |              |
|-----------------------------------------------------------------------------|---------|--------|---------------|--------------------------------------------|---|---------|--------------|
| Isocitrate dehydrogenase [NADP] cytoplasmic                                 | IDH1    | O75874 | CHEMBL2007625 | Enzyme                                     | 0 | 159 / 0 | Cannabivarin |
| Muscarinic acetylcholine receptor M1 (by homology)                          | CHRM1   | P11229 | CHEMBL216     | Family A G protein-coupled receptor        | 0 | 28 / 0  | Cannabivarin |
| Lysosomal Pro-X carboxypeptidase                                            | PRCP    | P42785 | CHEMBL2335    | Protease                                   | 0 | 10 / 0  | Cannabivarin |
| Peregrin                                                                    | BRPF1   | P55201 | CHEMBL3132741 | Reader                                     | 0 | 24 / 0  | Cannabivarin |
| Matrix metalloproteinase 9                                                  | MMP9    | P14780 | CHEMBL321     | Protease                                   | 0 | 14 / 0  | Cannabivarin |
| Cathepsin (V and K)                                                         | CTSV    | O60911 | CHEMBL3272    | Protease                                   | 0 | 11 / 0  | Cannabivarin |
| Matrix metalloproteinase 2                                                  | MMP2    | P08253 | CHEMBL333     | Protease                                   | 0 | 19 / 0  | Cannabivarin |
| Amine oxidase, copper containing                                            | AOC3    | Q16853 | CHEMBL3437    | Enzyme                                     | 0 | 4 / 0   | Cannabivarin |
| Egl nine homolog 1                                                          | EGLN1   | Q9GZT9 | CHEMBL5697    | Oxidoreductase                             | 0 | 7 / 0   | Cannabivarin |
| Serine/threonine-protein kinase 33                                          | STK33   | Q9BYT3 | CHEMBL6005    | Kinase                                     | 0 | 14 / 0  | Cannabivarin |
| Cytochrome b-c1 complex subunit 7                                           | UQCRB   | P14927 | CHEMBL1671612 | Transmembrane 1-electron transfer carriers | 0 | 1 / 0   | Cannabivarin |
| Adenosine A2a receptor                                                      | ADORA2A | P29274 | CHEMBL251     | Family A G protein-coupled receptor        | 0 | 132 / 0 | Cannabivarin |
| Matrix metalloproteinase 13                                                 | MMP13   | P45452 | CHEMBL280     | Protease                                   | 0 | 7 / 0   | Cannabivarin |
| Estradiol 17-beta-dehydrogenase 1                                           | HSD17B1 | P14061 | CHEMBL3181    | Enzyme                                     | 0 | 10 / 0  | Cannabivarin |
| Hormone sensitive lipase                                                    | LIPE    | Q05469 | CHEMBL3590    | Enzyme                                     | 0 | 51 / 0  | Cannabivarin |
| Quinone reductase 1                                                         | NQO1    | P15559 | CHEMBL3623    | Enzyme                                     | 0 | 4 / 0   | Cannabivarin |
| Methyl-CpG-binding protein 2                                                | MECP2   | P51608 | CHEMBL3638346 | Reader                                     | 0 | 1 / 0   | Cannabivarin |
| Methyl-CpG-binding domain protein 2                                         | MBD2    | Q9UBB5 | CHEMBL3707462 | Reader                                     | 0 | 2 / 0   | Cannabivarin |
| Vanilloid receptor                                                          | TRPV1   | Q8NER1 | CHEMBL4794    | Voltage-gated ion channel                  | 0 | 72 / 0  | Cannabivarin |
| Steryl-sulfatase                                                            | STS     | P08842 | CHEMBL3559    | Enzyme                                     | 0 | 7 / 0   | Cannabivarin |
| Dual specificity phosphatase Cdc25B                                         | CDC25B  | P30305 | CHEMBL4804    | Phosphatase                                | 0 | 14 / 0  | Cannabivarin |
| Dual-specificity tyrosine-phosphorylation regulated kinase 1A (by homology) | DYRK1A  | Q13627 | CHEMBL2292    | Kinase                                     | 0 | 39 / 0  | Cannabivarin |
| Serine/threonine-protein kinase PIM1                                        | PIM1    | P11309 | CHEMBL2147    | Kinase                                     | 0 | 75 / 0  | Cannabivarin |

|                                                       |         |        |               |                                     |          |                        |                         |
|-------------------------------------------------------|---------|--------|---------------|-------------------------------------|----------|------------------------|-------------------------|
| Serine/threonine-protein kinase mTOR                  | MTOR    | P42345 | CHEMBL2842    | Kinase                              | 0        | 28 /<br>0 Å Å Å Å Å    | Cannabivarin            |
| PI3-kinase p110-alpha subunit                         | PIK3CA  | P42336 | CHEMBL4005    | Enzyme                              | 0        | 59 /<br>0 Å Å Å Å Å    | Cannabivarin            |
| Serine/threonine-protein kinase PIM2                  | PIM2    | Q9P1W9 | CHEMBL4523    | Kinase                              | 0        | 63 /<br>0 Å Å Å Å Å    | Cannabivarin            |
| Bcl2-antagonist of cell death (BAD)                   | BAD     | Q92934 | CHEMBL3817    | Other cytosolic protein             | 0        | 10 /<br>0 Å Å Å Å Å    | Cannabivarin            |
| Serine/threonine-protein kinase PIM3                  | PIM3    | Q86V86 | CHEMBL5407    | Kinase                              | 0        | 10 /<br>0 Å Å Å Å Å    | Cannabivarin            |
| ADAMTS5                                               | ADAMTS5 | Q9UNA0 | CHEMBL2285    | Protease                            | 0        | 16 /<br>0 Å Å Å Å Å    | Cannabivarin            |
| Glycogen synthase kinase-3 beta                       | GSK3B   | P49841 | CHEMBL262     | Kinase                              | 0        | 50 /<br>0 Å Å Å Å Å    | Cannabivarin            |
| Phosphodiesterase 2A                                  | PDE2A   | O00408 | CHEMBL2652    | Phosphodiesterase                   | 0        | 52 /<br>0 Å Å Å Å Å    | Cannabivarin            |
| Phosphodiesterase 10A                                 | PDE10A  | Q9Y233 | CHEMBL4409    | Phosphodiesterase                   | 0        | 314 /<br>0 Å Å Å Å Å   | Cannabivarin            |
| TGF-beta receptor type II                             | TGFBR2  | P37173 | CHEMBL4267    | Kinase                              | 0        | 5 /<br>0 Å Å Å Å Å     | Cannabivarin            |
| TGF-beta receptor type I                              | TGFBR1  | P36897 | CHEMBL4439    | Kinase                              | 0        | 39 /<br>0 Å Å Å Å Å    | Cannabivarin            |
| Serine/threonine-protein kinase RIPK2                 | RIPK2   | O43353 | CHEMBL5014    | Kinase                              | 0        | 4 /<br>0 Å Å Å Å Å     | Cannabivarin            |
| Phosphodiesterase 7A                                  | PDE7A   | Q13946 | CHEMBL3012    | Phosphodiesterase                   | 0        | 15 /<br>0 Å Å Å Å Å    | Cannabivarin            |
| Cholecystokinin B receptor                            | CCKBR   | P32239 | CHEMBL298     | Family A G protein-coupled receptor | 0        | 180 /<br>0 Å Å Å Å Å   | Cannabivarin            |
| p53-binding protein Mdm-2                             | MDM2    | Q00987 | CHEMBL5023    | Other nuclear protein               | 0        | 38 /<br>0 Å Å Å Å Å    | Cannabivarin            |
| Leucine-rich repeat serine/threonine-protein kinase 2 | LRRK2   | Q5S007 | CHEMBL1075104 | Kinase                              | 0        | 27 /<br>0 Å Å Å Å Å    | Cannabivarin            |
| Bile acid receptor FXR                                | NR1H4   | Q96RI1 | CHEMBL2047    | Nuclear receptor                    | 0        | 26 /<br>0 Å Å Å Å Å    | Cannabivarin            |
|                                                       |         |        |               |                                     |          |                        |                         |
| Cannabinoid receptor 1                                | CNR1    | P21554 | CHEMBL218     | Family A G protein-coupled receptor | 0.959682 | 818 /<br>372 Å Å Å Å Å | Δ8-Tetrahydrocannabinol |
| Cannabinoid receptor 2                                | CNR2    | P34972 | CHEMBL253     | Family A G protein-coupled receptor | 0.959682 | 715 /<br>360 Å Å Å Å Å | Δ8-Tetrahydrocannabinol |
| Vascular endothelial growth factor receptor 2         | KDR     | P35968 | CHEMBL279     | Kinase                              | 0.864805 | 163 /<br>15 Å Å Å Å Å  | Δ8-Tetrahydrocannabinol |
| N-arachidonyl glycine receptor                        | GPR18   | Q14330 | CHEMBL2384898 | Family A G protein-coupled receptor | 0.434822 | 2 /<br>2 Å Å Å Å Å     | Δ8-Tetrahydrocannabinol |
| Glycine receptor subunit alpha-1                      | GLRA1   | P23415 | CHEMBL5845    | Ligand-gated ion channel            | 0.434822 | 1 /<br>1 Å Å Å Å Å     | Δ8-Tetrahydrocannabinol |



|                                                                |          |        |               |                                     |          |                  |                         |
|----------------------------------------------------------------|----------|--------|---------------|-------------------------------------|----------|------------------|-------------------------|
| Glucagon receptor                                              | GCGR     | P47871 | CHEMBL1985    | Family B G protein-coupled receptor | 0.101614 | 33 / 0Â Â Â Â Â  | Δ8-Tetrahydrocannabinol |
| Cystic fibrosis transmembrane conductance regulator            | CFTR     | P13569 | CHEMBL4051    | Other ion channel                   | 0.101614 | 3 / 0Â Â Â Â Â   | Δ8-Tetrahydrocannabinol |
| 5-lipoxygenase activating protein                              | ALOX5 AP | P20292 | CHEMBL4550    | Other cytosolic protein             | 0.101614 | 55 / 0Â Â Â Â Â  | Δ8-Tetrahydrocannabinol |
| Cathepsin D                                                    | CTSD     | P07339 | CHEMBL2581    | Protease                            | 0.101614 | 15 / 0Â Â Â Â Â  | Δ8-Tetrahydrocannabinol |
| Calcium sensing receptor                                       | CASR     | P41180 | CHEMBL1878    | Family C G protein-coupled receptor | 0.101614 | 33 / 0Â Â Â Â Â  | Δ8-Tetrahydrocannabinol |
| PH domain leucine-rich repeat-containing protein phosphatase 1 | PHLPP1   | O60346 | CHEMBL3414405 | Reader                              | 0.101614 | 0 / 2Â Â Â Â Â   | Δ8-Tetrahydrocannabinol |
| Serine/threonine-protein kinase ILK-1                          | ILK      | Q13418 | CHEMBL5247    | Kinase                              | 0.101614 | 0 / 2Â Â Â Â Â   | Δ8-Tetrahydrocannabinol |
| Epoxide hydratase                                              | EPHX2    | P34913 | CHEMBL2409    | Protease                            | 0.101614 | 153 / 0Â Â Â Â Â | Δ8-Tetrahydrocannabinol |
| Protein kinase C (PKC)                                         | PRKCZ    | Q05513 | CHEMBL3438    | Kinase                              | 0.101614 | 2 / 0Â Â Â Â Â   | Δ8-Tetrahydrocannabinol |
| Nitric oxide synthase, inducible (by homology)                 | NOS2     | P35228 | CHEMBL4481    | Enzyme                              | 0.101614 | 49 / 0Â Â Â Â Â  | Δ8-Tetrahydrocannabinol |
| Thromboxane A2 receptor                                        | TBXA2 R  | P21731 | CHEMBL2069    | Family A G protein-coupled receptor | 0.101614 | 7 / 0Â Â Â Â Â   | Δ8-Tetrahydrocannabinol |
| Prenyl protein specific protease                               | RCE1     | Q9Y256 | CHEMBL3411    | Protease                            | 0.101614 | 6 / 0Â Â Â Â Â   | Δ8-Tetrahydrocannabinol |
| Quinone reductase 2                                            | NQO2     | P16083 | CHEMBL3959    | Enzyme                              | 0.101614 | 9 / 0Â Â Â Â Â   | Δ8-Tetrahydrocannabinol |
| Corticotropin releasing factor receptor 1                      | CRHR1    | P34998 | CHEMBL1800    | Family B G protein-coupled receptor | 0.101614 | 150 / 0Â Â Â Â Â | Δ8-Tetrahydrocannabinol |
| Melanocortin receptor 4                                        | MC4R     | P32245 | CHEMBL259     | Family A G protein-coupled receptor | 0.101614 | 22 / 0Â Â Â Â Â  | Δ8-Tetrahydrocannabinol |
| Poly [ADP-ribose] polymerase-1                                 | PARP1    | P09874 | CHEMBL3105    | Enzyme                              | 0.101614 | 15 / 0Â Â Â Â Â  | Δ8-Tetrahydrocannabinol |
| Neurokinin 2 receptor                                          | TACR2    | P21452 | CHEMBL2327    | Family A G protein-coupled receptor | 0.101614 | 10 / 0Â Â Â Â Â  | Δ8-Tetrahydrocannabinol |

|                                                     |         |        |               |                                     |          |         |                         |
|-----------------------------------------------------|---------|--------|---------------|-------------------------------------|----------|---------|-------------------------|
| Estradiol 17-beta-dehydrogenase 3                   | HSD17B3 | P37058 | CHEMBL4234    | Enzyme                              | 0.101614 | 6 / 0   | Δ8-Tetrahydrocannabinol |
| Voltage-gated potassium channel subunit Kv1.5       | KCNA5   | P22460 | CHEMBL4306    | Voltage-gated ion channel           | 0.101614 | 106 / 0 | Δ8-Tetrahydrocannabinol |
| Neurokinin 3 receptor                               | TACR3   | P29371 | CHEMBL4429    | Family A G protein-coupled receptor | 0.101614 | 107 / 0 | Δ8-Tetrahydrocannabinol |
| Serine/threonine-protein kinase AKT                 | AKT1    | P31749 | CHEMBL4282    | Kinase                              | 0.101614 | 14 / 18 | Δ8-Tetrahydrocannabinol |
| Translocator protein (by homology)                  | TSPO    | P30536 | CHEMBL5742    | Membrane receptor                   | 0.101614 | 370 / 0 | Δ8-Tetrahydrocannabinol |
| Prostanoid EP1 receptor                             | PTGER1  | P34995 | CHEMBL1811    | Family A G protein-coupled receptor | 0.101614 | 36 / 0  | Δ8-Tetrahydrocannabinol |
| G-protein coupled receptor 55                       | GPR55   | Q9Y2T6 | CHEMBL1075322 | Family A G protein-coupled receptor | 0.101614 | 14 / 2  | Δ8-Tetrahydrocannabinol |
| Androgen Receptor                                   | AR      | P10275 | CHEMBL1871    | Nuclear receptor                    | 0.101614 | 61 / 30 | Δ8-Tetrahydrocannabinol |
| Histone deacetylase 2                               | HDAC2   | Q92769 | CHEMBL1937    | Eraser                              | 0.101614 | 8 / 0   | Δ8-Tetrahydrocannabinol |
| Protoporphyrinogen oxidase                          | PPOX    | P50336 | CHEMBL1926488 | Oxidoreductase                      | 0        | 1 / 0   | Δ8-Tetrahydrocannabinol |
| Kinesin-like protein 1                              | KIF11   | P52732 | CHEMBL4581    | Other cytosolic protein             | 0        | 33 / 0  | Δ8-Tetrahydrocannabinol |
| P2X purinoceptor 3                                  | P2RX3   | P56373 | CHEMBL2998    | Ligand-gated ion channel            | 0        | 38 / 0  | Δ8-Tetrahydrocannabinol |
| Peregrin                                            | BRPF1   | P55201 | CHEMBL3132741 | Reader                              | 0        | 19 / 0  | Δ8-Tetrahydrocannabinol |
| Sodium channel protein type II alpha subunit        | SCN2A   | Q99250 | CHEMBL4187    | Voltage-gated ion channel           | 0        | 31 / 0  | Δ8-Tetrahydrocannabinol |
| Type-1 angiotensin II receptor (by homology)        | AGTR1   | P30556 | CHEMBL227     | Family A G protein-coupled receptor | 0        | 3 / 0   | Δ8-Tetrahydrocannabinol |
| Calcium-activated potassium channel subunit alpha-1 | KCNMA1  | Q12791 | CHEMBL4304    | Voltage-gated ion channel           | 0        | 10 / 0  | Δ8-Tetrahydrocannabinol |
| Orexin receptor 2                                   | HCRT2   | O43614 | CHEMBL4792    | Family A G protein-coupled receptor | 0        | 240 / 0 | Δ8-Tetrahydrocannabinol |
| Orexin receptor 1                                   | HCRT1   | O43613 | CHEMBL5113    | Family A G protein-                 | 0        | 208 / 0 | Δ8-Tetrahydrocannabinol |

|                                                                 |                |                  |               |                                     |   |         |                                  |
|-----------------------------------------------------------------|----------------|------------------|---------------|-------------------------------------|---|---------|----------------------------------|
|                                                                 |                |                  |               | coupled receptor                    |   |         |                                  |
| Estradiol 17-beta-dehydrogenase 2                               | HSD17B2        | P37059           | CHEMBL2789    | Enzyme                              | 0 | 19 / 0  | $\Delta^8$ -Tetrahydrocannabinol |
| Hormone sensitive lipase                                        | LIPE           | Q05469           | CHEMBL3590    | Enzyme                              | 0 | 56 / 0  | $\Delta^8$ -Tetrahydrocannabinol |
| Beta secretase 2                                                | BACE2          | Q9Y5Z0           | CHEMBL2525    | Protease                            | 0 | 25 / 0  | $\Delta^8$ -Tetrahydrocannabinol |
| LDL-associated phospholipase A2                                 | PLA2G7         | Q13093           | CHEMBL3514    | Enzyme                              | 0 | 17 / 0  | $\Delta^8$ -Tetrahydrocannabinol |
| Cholecystokinin B receptor (by homology)                        | CCKBR          | P32239           | CHEMBL298     | Family A G protein-coupled receptor | 0 | 209 / 0 | $\Delta^8$ -Tetrahydrocannabinol |
| Phosphodiesterase 10A                                           | PDE10A         | Q9Y233           | CHEMBL4409    | Phosphodiesterase                   | 0 | 301 / 0 | $\Delta^8$ -Tetrahydrocannabinol |
| Tyrosine-protein kinase ABL                                     | ABL1           | P00519           | CHEMBL1862    | Kinase                              | 0 | 84 / 0  | $\Delta^8$ -Tetrahydrocannabinol |
| Thymidylate synthase                                            | TYMS           | P04818           | CHEMBL1952    | Transferase                         | 0 | 13 / 0  | $\Delta^8$ -Tetrahydrocannabinol |
| Signal transducer and activator of transcription 3              | STAT3          | P40763           | CHEMBL4026    | Transcription factor                | 0 | 18 / 0  | $\Delta^8$ -Tetrahydrocannabinol |
| Anandamide amidohydrolase                                       | FAAH           | O00519           | CHEMBL2243    | Enzyme                              | 0 | 78 / 0  | $\Delta^8$ -Tetrahydrocannabinol |
| Estrogen receptor beta                                          | ESR2           | Q92731           | CHEMBL242     | Nuclear receptor                    | 0 | 19 / 41 | $\Delta^8$ -Tetrahydrocannabinol |
| Serine/threonine-protein kinase PAK 1                           | PAK1           | Q13153           | CHEMBL4600    | Kinase                              | 0 | 1 / 0   | $\Delta^8$ -Tetrahydrocannabinol |
| ADAMTS5                                                         | ADAMTS5        | Q9UNA0           | CHEMBL2285    | Protease                            | 0 | 16 / 0  | $\Delta^8$ -Tetrahydrocannabinol |
| Bombesin receptor subtype-3                                     | BRS3           | P32247           | CHEMBL4080    | Family A G protein-coupled receptor | 0 | 1 / 0   | $\Delta^8$ -Tetrahydrocannabinol |
| Integrin alpha2/beta1                                           | ITGB1<br>ITGA2 | P05556<br>P17301 | CHEMBL3137268 | Unclassified protein                | 0 | 1 / 0   | $\Delta^8$ -Tetrahydrocannabinol |
| Voltage-gated potassium channel, KQT; KCNQ2(Kv7.2)/KCNQ3(Kv7.3) | KCNQ3<br>KCNQ2 | O43525<br>O43526 | CHEMBL2221348 | Voltage-gated ion channel           | 0 | 5 / 0   | $\Delta^8$ -Tetrahydrocannabinol |
| Cathepsin S                                                     | CTSS           | P25774           | CHEMBL2954    | Protease                            | 0 | 104 / 0 | $\Delta^8$ -Tetrahydrocannabinol |

|                                                       |                            |                            |               |                                     |   |         |                                  |
|-------------------------------------------------------|----------------------------|----------------------------|---------------|-------------------------------------|---|---------|----------------------------------|
| L-lactate dehydrogenase A chain                       | LDHA                       | P00338                     | CHEMBL4835    | Enzyme                              | 0 | 7 / 0   | $\Delta^8$ -Tetrahydrocannabinol |
| Isocitrate dehydrogenase [NADP] cytoplasmic           | IDH1                       | O75874                     | CHEMBL2007625 | Enzyme                              | 0 | 189 / 0 | $\Delta^8$ -Tetrahydrocannabinol |
| GABA-A receptor; alpha-3/beta-3/gamma-2               | GABRB3<br>GABRA3<br>GABRG2 | P28472<br>P34903<br>P18507 | CHEMBL2094120 | Ligand-gated ion channel            | 0 | 70 / 0  | $\Delta^8$ -Tetrahydrocannabinol |
| GABA-A receptor; alpha-1/beta-3/gamma-2               | GABRB3<br>GABRG2<br>GABRA1 | P28472<br>P18507<br>P14867 | CHEMBL2094121 | Ligand-gated ion channel            | 0 | 56 / 0  | $\Delta^8$ -Tetrahydrocannabinol |
| GABA-A receptor; alpha-5/beta-3/gamma-2               | GABRB3<br>GABRG2<br>GABRA5 | P28472<br>P18507<br>P31644 | CHEMBL2094122 | Ligand-gated ion channel            | 0 | 62 / 0  | $\Delta^8$ -Tetrahydrocannabinol |
| GABA-A receptor; alpha-2/beta-3/gamma-2               | GABRA2<br>GABRB3<br>GABRG2 | P47869<br>P28472<br>P18507 | CHEMBL2094130 | Ligand-gated ion channel            | 0 | 67 / 0  | $\Delta^8$ -Tetrahydrocannabinol |
| Monoglyceride lipase                                  | MGLL                       | Q99685                     | CHEMBL4191    | Enzyme                              | 0 | 15 / 0  | $\Delta^8$ -Tetrahydrocannabinol |
| Sodium channel protein type V alpha subunit           | SCN5A                      | Q14524                     | CHEMBL1980    | Voltage-gated ion channel           | 0 | 19 / 0  | $\Delta^8$ -Tetrahydrocannabinol |
| Egl nine homolog 1                                    | EGLN1                      | Q9GZT9                     | CHEMBL5697    | Oxidoreductase                      | 0 | 7 / 0   | $\Delta^8$ -Tetrahydrocannabinol |
| Prostanoid IP receptor                                | PTGIR                      | P43119                     | CHEMBL1995    | Family A G protein-coupled receptor | 0 | 0 / 10  | $\Delta^8$ -Tetrahydrocannabinol |
| Leucine-rich repeat serine/threonine-protein kinase 2 | LRRK2                      | Q5S007                     | CHEMBL1075104 | Kinase                              | 0 | 19 / 0  | $\Delta^8$ -Tetrahydrocannabinol |
| G-protein coupled bile acid receptor 1                | GPBAR1                     | Q8TDU6                     | CHEMBL5409    | Family A G protein-coupled receptor | 0 | 23 / 0  | $\Delta^8$ -Tetrahydrocannabinol |
| Troponin, cardiac muscle                              | TNNC1<br>TNNT2<br>TNNI3    | P63316<br>P45379<br>P19429 | CHEMBL2095202 | Unclassified protein                | 0 | 3 / 0   | $\Delta^8$ -Tetrahydrocannabinol |
| Lysosomal Pro-X carboxypeptidase                      | PRCP                       | P42785                     | CHEMBL2335    | Protease                            | 0 | 10 / 0  | $\Delta^8$ -Tetrahydrocannabinol |
| Serine/threonine-protein                              | ERN1                       | O75460                     | CHEMBL1163101 | Enzyme                              | 0 | 2 / 0   | $\Delta^8$ -Tetrahydrocannabinol |

|                                                    |                |                  |               |                                               |   |                     |                                         |
|----------------------------------------------------|----------------|------------------|---------------|-----------------------------------------------|---|---------------------|-----------------------------------------|
| kinase/endoribonucle<br>ase IRE1                   |                |                  |               |                                               |   |                     |                                         |
| Cyclin-dependent<br>kinase 5/CDK5<br>activator 1   | CDK5R1<br>CDK5 | Q15078<br>Q00535 | CHEMBL1907600 | Kinase                                        | 0 | 64 /<br>0Â Â Â Â Â  | $\Delta$ 8-<br>Tetrahydrocann<br>abinol |
| Tyrosine-protein<br>kinase JAK3                    | JAK3           | P52333           | CHEMBL2148    | Kinase                                        | 0 | 143 /<br>0Â Â Â Â Â | $\Delta$ 8-<br>Tetrahydrocann<br>abinol |
| c-Jun N-terminal<br>kinase 1                       | MAPK8          | P45983           | CHEMBL2276    | Kinase                                        | 0 | 53 /<br>0Â Â Â Â Â  | $\Delta$ 8-<br>Tetrahydrocann<br>abinol |
| Adenosine A2a<br>receptor                          | ADORA<br>2A    | P29274           | CHEMBL251     | Family A G<br>protein-<br>coupled<br>receptor | 0 | 96 /<br>0Â Â Â Â Â  | $\Delta$ 8-<br>Tetrahydrocann<br>abinol |
| Tyrosine-protein<br>kinase JAK1                    | JAK1           | P23458           | CHEMBL2835    | Kinase                                        | 0 | 59 /<br>0Â Â Â Â Â  | $\Delta$ 8-<br>Tetrahydrocann<br>abinol |
| Tyrosine-protein<br>kinase JAK2                    | JAK2           | O60674           | CHEMBL2971    | Kinase                                        | 0 | 138 /<br>0Â Â Â Â Â | $\Delta$ 8-<br>Tetrahydrocann<br>abinol |
| JAK3/JAK1                                          | JAK3<br>JAK1   | P52333<br>P23458 | CHEMBL3038491 | Kinase                                        | 0 | 15 /<br>0Â Â Â Â Â  | $\Delta$ 8-<br>Tetrahydrocann<br>abinol |
| Serine/threonine-<br>protein kinase<br>Aurora-C    | AURKC          | Q9UQB<br>9       | CHEMBL3935    | Kinase                                        | 0 | 9 /<br>0Â Â Â Â Â   | $\Delta$ 8-<br>Tetrahydrocann<br>abinol |
| Serine/threonine-<br>protein kinase<br>Aurora-A    | AURKA          | O14965           | CHEMBL4722    | Kinase                                        | 0 | 16 /<br>0Â Â Â Â Â  | $\Delta$ 8-<br>Tetrahydrocann<br>abinol |
| Thrombin and<br>coagulation factor X               | F10            | P00742           | CHEMBL244     | Protease                                      | 0 | 79 /<br>0Â Â Â Â Â  | $\Delta$ 8-<br>Tetrahydrocann<br>abinol |
| Histone deacetylase<br>4                           | HDAC4          | P56524           | CHEMBL3524    | Eraser                                        | 0 | 6 /<br>0Â Â Â Â Â   | $\Delta$ 8-<br>Tetrahydrocann<br>abinol |
| Histone deacetylase<br>10                          | HDAC10         | Q969S8           | CHEMBL5103    | Eraser                                        | 0 | 5 /<br>0Â Â Â Â Â   | $\Delta$ 8-<br>Tetrahydrocann<br>abinol |
| Cholecystokinin A<br>receptor (by<br>homology)     | CCKAR          | P32238           | CHEMBL1901    | Family A G<br>protein-<br>coupled<br>receptor | 0 | 26 /<br>0Â Â Â Â Â  | $\Delta$ 8-<br>Tetrahydrocann<br>abinol |
| FK506-binding<br>protein 1A                        | FKBP1A         | P62942           | CHEMBL1902    | Isomerase                                     | 0 | 64 /<br>0Â Â Â Â Â  | $\Delta$ 8-<br>Tetrahydrocann<br>abinol |
| Liver glycogen<br>phosphorylase                    | PYGL           | P06737           | CHEMBL2568    | Enzyme                                        | 0 | 46 /<br>0Â Â Â Â Â  | $\Delta$ 8-<br>Tetrahydrocann<br>abinol |
| Nitric-oxide<br>synthase, brain                    | NOS1           | P29475           | CHEMBL3568    | Enzyme                                        | 0 | 34 /<br>0Â Â Â Â Â  | $\Delta$ 8-<br>Tetrahydrocann<br>abinol |
| Cathepsin (V and K)                                | CTSV           | O60911           | CHEMBL3272    | Protease                                      | 0 | 17 /<br>0Â Â Â Â Â  | $\Delta$ 8-<br>Tetrahydrocann<br>abinol |
| Sodium channel<br>protein type IX alpha<br>subunit | SCN9A          | Q15858           | CHEMBL4296    | Voltage-<br>gated ion<br>channel              | 0 | 43 /<br>0Â Â Â Â Â  | $\Delta$ 8-<br>Tetrahydrocann<br>abinol |

|                                                     |                 |                  |               |                                     |          |            |                                  |
|-----------------------------------------------------|-----------------|------------------|---------------|-------------------------------------|----------|------------|----------------------------------|
| Nitric-oxide synthase, endothelial                  | NOS3            | P29474           | CHEMBL4803    | Enzyme                              | 0        | 14 / 0     | $\Delta^8$ -Tetrahydrocannabinol |
| Macrophage migration inhibitory factor              | MIF             | P14174           | CHEMBL2085    | Enzyme                              | 0        | 2 / 0      | $\Delta^8$ -Tetrahydrocannabinol |
| p53-binding protein Mdm-2                           | MDM2            | Q00987           | CHEMBL5023    | Other nuclear protein               | 0        | 59 / 0     | $\Delta^8$ -Tetrahydrocannabinol |
| Serine/threonine-protein kinase PIM1                | PIM1            | P11309           | CHEMBL2147    | Kinase                              | 0        | 71 / 0     | $\Delta^8$ -Tetrahydrocannabinol |
| Phosphodiesterase 2A                                | PDE2A           | O00408           | CHEMBL2652    | Phosphodiesterase                   | 0        | 32 / 0     | $\Delta^8$ -Tetrahydrocannabinol |
| Serine/threonine-protein kinase PIM2                | PIM2            | Q9P1W9           | CHEMBL4523    | Kinase                              | 0        | 59 / 0     | $\Delta^8$ -Tetrahydrocannabinol |
| Glutamate NMDA receptor; GRIN1/GRIN2B               | GRIN1<br>GRIN2B | Q05586<br>Q13224 | CHEMBL1907603 | Ligand-gated ion channel            | 0        | 1 / 0      | $\Delta^8$ -Tetrahydrocannabinol |
| Carboxypeptidase B                                  | CPB1            | P15086           | CHEMBL2552    | Protease                            | 0        | 3 / 0      | $\Delta^8$ -Tetrahydrocannabinol |
| Phosphodiesterase 7A                                | PDE7A           | Q13946           | CHEMBL3012    | Phosphodiesterase                   | 0        | 12 / 0     | $\Delta^8$ -Tetrahydrocannabinol |
| Tumor necrosis factor receptor R1                   | TNFRSF1A        | P19438           | CHEMBL3378    | Membrane receptor                   | 0        | 3 / 0      | $\Delta^8$ -Tetrahydrocannabinol |
| Cannabinoid receptor 1                              | CNR1            | P21554           | CHEMBL218     | Family A G protein-coupled receptor | 0.959682 | 1029 / 367 | $\Delta^9$ -Tetrahydrocannabinol |
| Cannabinoid receptor 2                              | CNR2            | P34972           | CHEMBL253     | Family A G protein-coupled receptor | 0.959682 | 959 / 358  | $\Delta^9$ -Tetrahydrocannabinol |
| N-arachidonyl glycine receptor                      | GPR18           | Q14330           | CHEMBL2384898 | Family A G protein-coupled receptor | 0.809839 | 8 / 2      | $\Delta^9$ -Tetrahydrocannabinol |
| Glycine receptor subunit alpha-1                    | GLRA1           | P23415           | CHEMBL5845    | Ligand-gated ion channel            | 0.809839 | 1 / 1      | $\Delta^9$ -Tetrahydrocannabinol |
| Vascular endothelial growth factor receptor 2       | KDR             | P35968           | CHEMBL279     | Kinase                              | 0.63486  | 249 / 13   | $\Delta^9$ -Tetrahydrocannabinol |
| Glucagon receptor                                   | GCGR            | P47871           | CHEMBL1985    | Family B G protein-coupled receptor | 0.101614 | 53 / 0     | $\Delta^9$ -Tetrahydrocannabinol |
| Cystic fibrosis transmembrane conductance regulator | CFTR            | P13569           | CHEMBL4051    | Other ion channel                   | 0.101614 | 5 / 0      | $\Delta^9$ -Tetrahydrocannabinol |
| G-protein coupled receptor 55                       | GPR55           | Q9Y2T6           | CHEMBL1075322 | Family A G protein-                 | 0.101614 | 17 / 2     | $\Delta^9$ -Tetrahydrocannabinol |

|                                                                |          |        |               |                                     |          |                   |                         |
|----------------------------------------------------------------|----------|--------|---------------|-------------------------------------|----------|-------------------|-------------------------|
|                                                                |          |        |               | coupled receptor                    |          |                   |                         |
| 5-lipoxygenase activating protein                              | ALOX5 AP | P20292 | CHEMBL4550    | Other cytosolic protein             | 0.101614 | 77 / 0 Å Å Å Å Å  | Δ9-Tetrahydrocannabinol |
| Cathepsin D                                                    | CTSD     | P07339 | CHEMBL2581    | Protease                            | 0.101614 | 34 / 0 Å Å Å Å Å  | Δ9-Tetrahydrocannabinol |
| Serotonin 2b (5-HT2b) receptor                                 | HTR2B    | P41595 | CHEMBL1833    | Family A G protein-coupled receptor | 0.101614 | 43 / 0 Å Å Å Å Å  | Δ9-Tetrahydrocannabinol |
| Serotonin 2c (5-HT2c) receptor                                 | HTR2C    | P28335 | CHEMBL225     | Family A G protein-coupled receptor | 0.101614 | 67 / 0 Å Å Å Å Å  | Δ9-Tetrahydrocannabinol |
| Epoxide hydratase                                              | EPHX2    | P34913 | CHEMBL2409    | Protease                            | 0.101614 | 218 / 0 Å Å Å Å Å | Δ9-Tetrahydrocannabinol |
| Prenyl protein specific protease                               | RCE1     | Q9Y256 | CHEMBL3411    | Protease                            | 0.101614 | 6 / 0 Å Å Å Å Å   | Δ9-Tetrahydrocannabinol |
| Calcium sensing receptor                                       | CASR     | P41180 | CHEMBL1878    | Family C G protein-coupled receptor | 0.101614 | 40 / 0 Å Å Å Å Å  | Δ9-Tetrahydrocannabinol |
| Monoamine oxidase A                                            | MAOA     | P21397 | CHEMBL1951    | Oxidoreductase                      | 0.101614 | 103 / 0 Å Å Å Å Å | Δ9-Tetrahydrocannabinol |
| Protein kinase C (PKC)                                         | PRKCZ    | Q05513 | CHEMBL3438    | Kinase                              | 0.101614 | 2 / 0 Å Å Å Å Å   | Δ9-Tetrahydrocannabinol |
| Nitric oxide synthase, inducible (by homology)                 | NOS2     | P35228 | CHEMBL4481    | Enzyme                              | 0.101614 | 68 / 0 Å Å Å Å Å  | Δ9-Tetrahydrocannabinol |
| Glycine transporter 1 (by homology)                            | SLC6A9   | P48067 | CHEMBL2337    | Electrochemical transporter         | 0.101614 | 74 / 0 Å Å Å Å Å  | Δ9-Tetrahydrocannabinol |
| Prostanoid EP1 receptor                                        | PTGER1   | P34995 | CHEMBL1811    | Family A G protein-coupled receptor | 0.101614 | 47 / 0 Å Å Å Å Å  | Δ9-Tetrahydrocannabinol |
| Thromboxane A2 receptor                                        | TBXA2R   | P21731 | CHEMBL2069    | Family A G protein-coupled receptor | 0.101614 | 8 / 0 Å Å Å Å Å   | Δ9-Tetrahydrocannabinol |
| Autotaxin                                                      | ENPP2    | Q13822 | CHEMBL3691    | Enzyme                              | 0.101614 | 2 / 0 Å Å Å Å Å   | Δ9-Tetrahydrocannabinol |
| Phosphodiesterase 10A                                          | PDE10A   | Q9Y233 | CHEMBL4409    | Phosphodiesterase                   | 0.101614 | 611 / 0 Å Å Å Å Å | Δ9-Tetrahydrocannabinol |
| PH domain leucine-rich repeat-containing protein phosphatase 1 | PHLPP1   | O60346 | CHEMBL3414405 | Reader                              | 0.101614 | 0 / 2 Å Å Å Å Å   | Δ9-Tetrahydrocannabinol |
| Serine/threonine-protein kinase ILK-1                          | ILK      | Q13418 | CHEMBL5247    | Kinase                              | 0.101614 | 0 / 2 Å Å Å Å Å   | Δ9-Tetrahydrocannabinol |

|                                                    |         |        |               |                                     |          |         |                                  |
|----------------------------------------------------|---------|--------|---------------|-------------------------------------|----------|---------|----------------------------------|
| P2X purinoceptor 3                                 | P2RX3   | P56373 | CHEMBL2998    | Ligand-gated ion channel            | 0.101614 | 46 / 0  | $\Delta^9$ -Tetrahydrocannabinol |
| Kinesin-like protein 1                             | KIF11   | P52732 | CHEMBL4581    | Other cytosolic protein             | 0.101614 | 54 / 0  | $\Delta^9$ -Tetrahydrocannabinol |
| Translocator protein (by homology)                 | TSPO    | P30536 | CHEMBL5742    | Membrane receptor                   | 0.101614 | 371 / 0 | $\Delta^9$ -Tetrahydrocannabinol |
| Estradiol 17-beta-dehydrogenase 3                  | HSD17B3 | P37058 | CHEMBL4234    | Enzyme                              | 0.101614 | 6 / 0   | $\Delta^9$ -Tetrahydrocannabinol |
| Voltage-gated potassium channel subunit Kv1.5      | KCNA5   | P22460 | CHEMBL4306    | Voltage-gated ion channel           | 0.101614 | 108 / 0 | $\Delta^9$ -Tetrahydrocannabinol |
| Melanocortin receptor 4                            | MC4R    | P32245 | CHEMBL259     | Family A G protein-coupled receptor | 0.101614 | 14 / 0  | $\Delta^9$ -Tetrahydrocannabinol |
| Methyl-CpG-binding protein 2                       | MECP2   | P51608 | CHEMBL3638346 | Reader                              | 0.101614 | 1 / 0   | $\Delta^9$ -Tetrahydrocannabinol |
| Methyl-CpG-binding domain protein 2                | MBD2    | Q9UBB5 | CHEMBL3707462 | Reader                              | 0.101614 | 1 / 0   | $\Delta^9$ -Tetrahydrocannabinol |
| Quinone reductase 2                                | NQO2    | P16083 | CHEMBL3959    | Enzyme                              | 0.101614 | 12 / 0  | $\Delta^9$ -Tetrahydrocannabinol |
| Signal transducer and activator of transcription 3 | STAT3   | P40763 | CHEMBL4026    | Transcription factor                | 0.101614 | 30 / 0  | $\Delta^9$ -Tetrahydrocannabinol |
| Histone deacetylase 2                              | HDAC2   | Q92769 | CHEMBL1937    | Eraser                              | 0.101614 | 19 / 0  | $\Delta^9$ -Tetrahydrocannabinol |
| NADPH oxidase 4                                    | NOX4    | Q9NPH5 | CHEMBL1250375 | Enzyme                              | 0.101614 | 3 / 0   | $\Delta^9$ -Tetrahydrocannabinol |
| Protoporphyrinogen oxidase                         | PPOX    | P50336 | CHEMBL1926488 | Oxidoreductase                      | 0.101614 | 2 / 0   | $\Delta^9$ -Tetrahydrocannabinol |
| Corticotropin releasing factor receptor 1          | CRHR1   | P34998 | CHEMBL1800    | Family B G protein-coupled receptor | 0.101614 | 205 / 0 | $\Delta^9$ -Tetrahydrocannabinol |
| Metabotropic glutamate receptor 5 (by homology)    | GRM5    | P41594 | CHEMBL3227    | Family C G protein-coupled receptor | 0.101614 | 487 / 0 | $\Delta^9$ -Tetrahydrocannabinol |
| Type-1 angiotensin II receptor (by homology)       | AGTR1   | P30556 | CHEMBL227     | Family A G protein-coupled receptor | 0.101614 | 8 / 0   | $\Delta^9$ -Tetrahydrocannabinol |
| Serine/threonine-protein kinase AKT                | AKT1    | P31749 | CHEMBL4282    | Kinase                              | 0        | 24 / 17 | $\Delta^9$ -Tetrahydrocannabinol |
| Peregrin                                           | BRPF1   | P55201 | CHEMBL3132741 | Reader                              | 0        | 27 / 0  | $\Delta^9$ -Tetrahydrocannabinol |



|                                                                 |                |                  |               |                                     |   |         |                                  |
|-----------------------------------------------------------------|----------------|------------------|---------------|-------------------------------------|---|---------|----------------------------------|
| Hormone sensitive lipase                                        | LIPE           | Q05469           | CHEMBL3590    | Enzyme                              | 0 | 63 / 0  | $\Delta^9$ -Tetrahydrocannabinol |
| FK506-binding protein 1A                                        | FKBP1A         | P62942           | CHEMBL1902    | Isomerase                           | 0 | 74 / 0  | $\Delta^9$ -Tetrahydrocannabinol |
| Neurokinin 2 receptor                                           | TACR2          | P21452           | CHEMBL2327    | Family A G protein-coupled receptor | 0 | 13 / 0  | $\Delta^9$ -Tetrahydrocannabinol |
| Serotonin 6 (5-HT6) receptor                                    | HTR6           | P50406           | CHEMBL3371    | Family A G protein-coupled receptor | 0 | 101 / 0 | $\Delta^9$ -Tetrahydrocannabinol |
| Neurokinin 3 receptor                                           | TACR3          | P29371           | CHEMBL4429    | Family A G protein-coupled receptor | 0 | 133 / 0 | $\Delta^9$ -Tetrahydrocannabinol |
| Anandamide amidohydrolase                                       | FAAH           | O00519           | CHEMBL2243    | Enzyme                              | 0 | 140 / 0 | $\Delta^9$ -Tetrahydrocannabinol |
| Mitogen-activated protein kinase kinase 5                       | MAP3K5         | Q99683           | CHEMBL5285    | Kinase                              | 0 | 6 / 0   | $\Delta^9$ -Tetrahydrocannabinol |
| ADAMTS5                                                         | ADAMTS5        | Q9UNAO           | CHEMBL2285    | Protease                            | 0 | 21 / 0  | $\Delta^9$ -Tetrahydrocannabinol |
| LDL-associated phospholipase A2                                 | PLA2G7         | Q13093           | CHEMBL3514    | Enzyme                              | 0 | 21 / 0  | $\Delta^9$ -Tetrahydrocannabinol |
| Estradiol 17-beta-dehydrogenase 2                               | HSD17B2        | P37059           | CHEMBL2789    | Enzyme                              | 0 | 29 / 0  | $\Delta^9$ -Tetrahydrocannabinol |
| Calcium-activated potassium channel subunit alpha-1             | KCNMA1         | Q12791           | CHEMBL4304    | Voltage-gated ion channel           | 0 | 10 / 0  | $\Delta^9$ -Tetrahydrocannabinol |
| Phosphodiesterase 5A                                            | PDE5A          | O76074           | CHEMBL1827    | Phosphodiesterase                   | 0 | 156 / 0 | $\Delta^9$ -Tetrahydrocannabinol |
| Glutaminyl-peptide cyclotransferase                             | QPCT           | Q16769           | CHEMBL4508    | Enzyme                              | 0 | 31 / 0  | $\Delta^9$ -Tetrahydrocannabinol |
| MAP kinase p38 alpha                                            | MAPK14         | Q16539           | CHEMBL260     | Kinase                              | 0 | 425 / 0 | $\Delta^9$ -Tetrahydrocannabinol |
| Voltage-gated potassium channel, KQT; KCNQ2(Kv7.2)/KCNQ3(Kv7.3) | KCNQ3<br>KCNQ2 | O43525<br>O43526 | CHEMBL2221348 | Voltage-gated ion channel           | 0 | 6 / 0   | $\Delta^9$ -Tetrahydrocannabinol |
| Liver glycogen phosphorylase                                    | PYGL           | P06737           | CHEMBL2568    | Enzyme                              | 0 | 51 / 0  | $\Delta^9$ -Tetrahydrocannabinol |
| Proteinase-activated receptor 1                                 | F2R            | P25116           | CHEMBL3974    | Family A G protein-coupled receptor | 0 | 54 / 0  | $\Delta^9$ -Tetrahydrocannabinol |

|                                              |         |        |               |                                     |   |         |                                  |
|----------------------------------------------|---------|--------|---------------|-------------------------------------|---|---------|----------------------------------|
| Sodium channel protein type II alpha subunit | SCN2A   | Q99250 | CHEMBL4187    | Voltage-gated ion channel           | 0 | 37 / 0  | $\Delta^9$ -Tetrahydrocannabinol |
| Serine/threonine-protein kinase PAK 1        | PAK1    | Q13153 | CHEMBL4600    | Kinase                              | 0 | 1 / 0   | $\Delta^9$ -Tetrahydrocannabinol |
| Nuclear receptor ROR-gamma                   | RORC    | P51449 | CHEMBL1741186 | Nuclear receptor                    | 0 | 79 / 0  | $\Delta^9$ -Tetrahydrocannabinol |
| C-C chemokine receptor type 1                | CCR1    | P32246 | CHEMBL2413    | Family A G protein-coupled receptor | 0 | 55 / 0  | $\Delta^9$ -Tetrahydrocannabinol |
| Beta secretase 2                             | BACE2   | Q9Y5Z0 | CHEMBL2525    | Protease                            | 0 | 51 / 0  | $\Delta^9$ -Tetrahydrocannabinol |
| G-protein coupled bile acid receptor 1       | GPBAR1  | Q8TDU6 | CHEMBL5409    | Family A G protein-coupled receptor | 0 | 33 / 0  | $\Delta^9$ -Tetrahydrocannabinol |
| Formyl peptide receptor 1                    | FPR1    | P21462 | CHEMBL3359    | Family A G protein-coupled receptor | 0 | 3 / 0   | $\Delta^9$ -Tetrahydrocannabinol |
| Casein kinase II alpha                       | CSNK2A1 | P68400 | CHEMBL3629    | Kinase                              | 0 | 5 / 0   | $\Delta^9$ -Tetrahydrocannabinol |
| Thymidylate synthase                         | TYMS    | P04818 | CHEMBL1952    | Transferase                         | 0 | 19 / 0  | $\Delta^9$ -Tetrahydrocannabinol |
| Serine/threonine-protein kinase PIM1         | PIM1    | P11309 | CHEMBL2147    | Kinase                              | 0 | 77 / 0  | $\Delta^9$ -Tetrahydrocannabinol |
| Lysosomal Pro-X carboxypeptidase             | PRCP    | P42785 | CHEMBL2335    | Protease                            | 0 | 17 / 0  | $\Delta^9$ -Tetrahydrocannabinol |
| Serine/threonine-protein kinase PIM2         | PIM2    | Q9P1W9 | CHEMBL4523    | Kinase                              | 0 | 56 / 0  | $\Delta^9$ -Tetrahydrocannabinol |
| Orexin receptor 2                            | HCRT2   | O43614 | CHEMBL4792    | Family A G protein-coupled receptor | 0 | 469 / 0 | $\Delta^9$ -Tetrahydrocannabinol |
| L-lactate dehydrogenase B chain              | LDHB    | P07195 | CHEMBL4940    | Enzyme                              | 0 | 2 / 0   | $\Delta^9$ -Tetrahydrocannabinol |
| Orexin receptor 1                            | HCRT1   | O43613 | CHEMBL5113    | Family A G protein-coupled receptor | 0 | 405 / 0 | $\Delta^9$ -Tetrahydrocannabinol |
| Serine/threonine-protein kinase PIM3         | PIM3    | Q86V86 | CHEMBL5407    | Kinase                              | 0 | 10 / 0  | $\Delta^9$ -Tetrahydrocannabinol |
| Pyroglutamylated RFamide peptide receptor    | QRFR    | Q96P65 | CHEMBL5852    | Family A G protein-coupled receptor | 0 | 9 / 0   | $\Delta^9$ -Tetrahydrocannabinol |

|                                                        |                 |                  |               |                                     |   |         |                                  |
|--------------------------------------------------------|-----------------|------------------|---------------|-------------------------------------|---|---------|----------------------------------|
| Microtubule-associated protein tau                     | MAPT            | P10636           | CHEMBL1293224 | Unclassified protein                | 0 | 5 / 0   | $\Delta^9$ -Tetrahydrocannabinol |
| Glutamate NMDA receptor; GRIN1/GRIN2B                  | GRIN1<br>GRIN2B | Q05586<br>Q13224 | CHEMBL1907603 | Ligand-gated ion channel            | 0 | 2 / 0   | $\Delta^9$ -Tetrahydrocannabinol |
| Adenosine A2b receptor                                 | ADORA2B         | P29275           | CHEMBL255     | Family A G protein-coupled receptor | 0 | 41 / 0  | $\Delta^9$ -Tetrahydrocannabinol |
| Sodium channel protein type IX alpha subunit           | SCN9A           | Q15858           | CHEMBL4296    | Voltage-gated ion channel           | 0 | 65 / 0  | $\Delta^9$ -Tetrahydrocannabinol |
| Leucine-rich repeat serine/threonine-protein kinase 2  | LRRK2           | Q5S007           | CHEMBL1075104 | Kinase                              | 0 | 31 / 0  | $\Delta^9$ -Tetrahydrocannabinol |
| Serine/threonine-protein kinase/endoribonuclease IRE1  | ERN1            | O75460           | CHEMBL1163101 | Enzyme                              | 0 | 2 / 0   | $\Delta^9$ -Tetrahydrocannabinol |
| Tyrosine-protein kinase ABL                            | ABL1            | P00519           | CHEMBL1862    | Kinase                              | 0 | 114 / 0 | $\Delta^9$ -Tetrahydrocannabinol |
| Poly [ADP-ribose] polymerase-1                         | PARP1           | P09874           | CHEMBL3105    | Enzyme                              | 0 | 36 / 0  | $\Delta^9$ -Tetrahydrocannabinol |
| Integrin alpha2/beta1                                  | ITGB1<br>ITGA2  | P05556<br>P17301 | CHEMBL3137268 | Unclassified protein                | 0 | 1 / 0   | $\Delta^9$ -Tetrahydrocannabinol |
| P2X purinoceptor 7                                     | P2RX7           | Q99572           | CHEMBL4805    | Ligand-gated ion channel            | 0 | 189 / 0 | $\Delta^9$ -Tetrahydrocannabinol |
| 6-phosphofructo-2-kinase/fructose-2,6-bisphosphatase 3 | PFKFB3          | Q16875           | CHEMBL2331053 | Enzyme                              | 0 | 70 / 0  | $\Delta^9$ -Tetrahydrocannabinol |
| Trace amine-associated receptor 1 (by homology)        | TAAR1           | Q96RJ0           | CHEMBL5857    | Family A G protein-coupled receptor | 0 | 21 / 0  | $\Delta^9$ -Tetrahydrocannabinol |
| Cholesteryl ester transfer protein                     | CETP            | P11597           | CHEMBL3572    | Other ion channel                   | 0 | 10 / 4  | $\Delta^9$ -Tetrahydrocannabinol |
| Muscarinic acetylcholine receptor M4                   | CHRM4           | P08173           | CHEMBL1821    | Family A G protein-coupled receptor | 0 | 22 / 0  | $\Delta^9$ -Tetrahydrocannabinol |
| Muscarinic acetylcholine receptor M5                   | CHRM5           | P08912           | CHEMBL2035    | Family A G protein-coupled receptor | 0 | 10 / 0  | $\Delta^9$ -Tetrahydrocannabinol |
| Thrombin and coagulation factor X                      | F10             | P00742           | CHEMBL244     | Protease                            | 0 | 133 / 0 | $\Delta^9$ -Tetrahydrocannabinol |
| Muscarinic acetylcholine receptor M3                   | CHRM3           | P20309           | CHEMBL245     | Family A G protein-coupled receptor | 0 | 82 / 0  | $\Delta^9$ -Tetrahydrocannabinol |

|                                                     |                                                     |                                                                  |               |                                     |          |                     |                          |
|-----------------------------------------------------|-----------------------------------------------------|------------------------------------------------------------------|---------------|-------------------------------------|----------|---------------------|--------------------------|
| Cholecystokinin B receptor                          | CCKBR                                               | P32239                                                           | CHEMBL298     | Family A G protein-coupled receptor | 0        | 275 / 0 Å Å Å Å Å   | Δ9-Tetrahydrocannabinol  |
| Protein kinase C delta                              | PRKCD                                               | Q05655                                                           | CHEMBL2996    | Kinase                              | 0        | 19 / 0 Å Å Å Å Å    | Δ9-Tetrahydrocannabinol  |
| Histone deacetylase 4                               | HDAC4                                               | P56524                                                           | CHEMBL3524    | Eraser                              | 0        | 9 / 0 Å Å Å Å Å     | Δ9-Tetrahydrocannabinol  |
| Protein kinase C theta                              | PRKCQ                                               | Q04759                                                           | CHEMBL3920    | Kinase                              | 0        | 31 / 0 Å Å Å Å Å    | Δ9-Tetrahydrocannabinol  |
| Histone deacetylase 10                              | HDAC10                                              | Q969S8                                                           | CHEMBL5103    | Eraser                              | 0        | 5 / 0 Å Å Å Å Å     | Δ9-Tetrahydrocannabinol  |
| Gamma-secretase                                     | PSEN2<br>PSENEN<br>NCSTN<br>APH1A<br>PSEN1<br>APH1B | P49810<br>Q9NZ4<br>2<br>Q92542<br>Q96BI3<br>P49768<br>Q8WW<br>43 | CHEMBL2094135 | Protease                            | 0        | 144 / 0 Å Å Å Å Å   | Δ9-Tetrahydrocannabinol  |
| Cannabinoid receptor 1                              | CNR1                                                | P21554                                                           | CHEMBL218     | Family A G protein-coupled receptor | 0.732225 | 577 / 367 Å Å Å Å Å | Tetrahydrocannabinavarin |
| N-arachidonyl glycine receptor                      | GPR18                                               | Q14330                                                           | CHEMBL2384898 | Family A G protein-coupled receptor | 0.690848 | 2 / 2 Å Å Å Å Å     | Tetrahydrocannabinavarin |
| Cannabinoid receptor 2                              | CNR2                                                | P34972                                                           | CHEMBL253     | Family A G protein-coupled receptor | 0.690848 | 460 / 358 Å Å Å Å Å | Tetrahydrocannabinavarin |
| Glycine receptor subunit alpha-1                    | GLRA1                                               | P23415                                                           | CHEMBL5845    | Ligand-gated ion channel            | 0.690848 | 1 / 1 Å Å Å Å Å     | Tetrahydrocannabinavarin |
| Vascular endothelial growth factor receptor 2       | KDR                                                 | P35968                                                           | CHEMBL279     | Kinase                              | 0.5096   | 171 / 13 Å Å Å Å Å  | Tetrahydrocannabinavarin |
| Glucagon receptor                                   | GCGR                                                | P47871                                                           | CHEMBL1985    | Family B G protein-coupled receptor | 0.097875 | 27 / 0 Å Å Å Å Å    | Tetrahydrocannabinavarin |
| Melanocortin receptor 4                             | MC4R                                                | P32245                                                           | CHEMBL259     | Family A G protein-coupled receptor | 0.097875 | 20 / 0 Å Å Å Å Å    | Tetrahydrocannabinavarin |
| Quinone reductase 2                                 | NQO2                                                | P16083                                                           | CHEMBL3959    | Enzyme                              | 0.097875 | 10 / 0 Å Å Å Å Å    | Tetrahydrocannabinavarin |
| Cystic fibrosis transmembrane conductance regulator | CFTR                                                | P13569                                                           | CHEMBL4051    | Other ion channel                   | 0.097875 | 1 / 0 Å Å Å Å Å     | Tetrahydrocannabinavarin |
| Calcium sensing receptor                            | CASR                                                | P41180                                                           | CHEMBL1878    | Family C G protein-                 | 0.097875 | 29 / 0 Å Å Å Å Å    | Tetrahydrocannabinavarin |

|                                                                |                            |                            |               |                                     |          |                     |                        |
|----------------------------------------------------------------|----------------------------|----------------------------|---------------|-------------------------------------|----------|---------------------|------------------------|
|                                                                |                            |                            |               | coupled receptor                    |          |                     |                        |
| Poly [ADP-ribose] polymerase-1                                 | PARP1                      | P09874                     | CHEMBL3105    | Enzyme                              | 0.097875 | 15 /<br>0Â Â Â Â Â  | Tetrahydrocannabivarin |
| Epoxide hydratase                                              | EPHX2                      | P34913                     | CHEMBL2409    | Protease                            | 0.097875 | 107 /<br>0Â Â Â Â Â | Tetrahydrocannabivarin |
| Serotonin 2b (5-HT2b) receptor                                 | HTR2B                      | P41595                     | CHEMBL1833    | Family A G protein-coupled receptor | 0.097875 | 39 /<br>0Â Â Â Â Â  | Tetrahydrocannabivarin |
| Serotonin 2c (5-HT2c) receptor                                 | HTR2C                      | P28335                     | CHEMBL225     | Family A G protein-coupled receptor | 0.097875 | 45 /<br>0Â Â Â Â Â  | Tetrahydrocannabivarin |
| Translocator protein (by homology)                             | TSPO                       | P30536                     | CHEMBL5742    | Membrane receptor                   | 0.097875 | 347 /<br>0Â Â Â Â Â | Tetrahydrocannabivarin |
| Cathepsin D                                                    | CTSD                       | P07339                     | CHEMBL2581    | Protease                            | 0.097875 | 11 /<br>0Â Â Â Â Â  | Tetrahydrocannabivarin |
| L-lactate dehydrogenase A chain                                | LDHA                       | P00338                     | CHEMBL4835    | Enzyme                              | 0.097875 | 6 /<br>0Â Â Â Â Â   | Tetrahydrocannabivarin |
| Protein kinase C (PKC)                                         | PRKCZ                      | Q05513                     | CHEMBL3438    | Kinase                              | 0.097875 | 2 /<br>0Â Â Â Â Â   | Tetrahydrocannabivarin |
| Estradiol 17-beta-dehydrogenase 3                              | HSD17B3                    | P37058                     | CHEMBL4234    | Enzyme                              | 0.097875 | 9 /<br>0Â Â Â Â Â   | Tetrahydrocannabivarin |
| Nitric oxide synthase, inducible (by homology)                 | NOS2                       | P35228                     | CHEMBL4481    | Enzyme                              | 0.097875 | 72 /<br>0Â Â Â Â Â  | Tetrahydrocannabivarin |
| PH domain leucine-rich repeat-containing protein phosphatase 1 | PHLPP1                     | O60346                     | CHEMBL3414405 | Reader                              | 0.097875 | 0 /<br>2Â Â Â Â Â   | Tetrahydrocannabivarin |
| Serine/threonine-protein kinase ILK-1                          | ILK                        | Q13418                     | CHEMBL5247    | Kinase                              | 0.097875 | 0 /<br>2Â Â Â Â Â   | Tetrahydrocannabivarin |
| Anandamide amidohydrolase                                      | FAAH                       | O00519                     | CHEMBL2243    | Enzyme                              | 0.097875 | 35 /<br>0Â Â Â Â Â  | Tetrahydrocannabivarin |
| LDL-associated phospholipase A2                                | PLA2G7                     | Q13093                     | CHEMBL3514    | Enzyme                              | 0.097875 | 14 /<br>0Â Â Â Â Â  | Tetrahydrocannabivarin |
| Estradiol 17-beta-dehydrogenase 2                              | HSD17B2                    | P37059                     | CHEMBL2789    | Enzyme                              | 0.097875 | 15 /<br>0Â Â Â Â Â  | Tetrahydrocannabivarin |
| 5-lipoxygenase activating protein                              | ALOX5AP                    | P20292                     | CHEMBL4550    | Other cytosolic protein             | 0.097875 | 31 /<br>0Â Â Â Â Â  | Tetrahydrocannabivarin |
| GABA-A receptor; alpha-1/beta-2/gamma-2                        | GABRA1<br>GABRB2<br>GABRG2 | P14867<br>P47870<br>P18507 | CHEMBL2095172 | Ligand-gated ion channel            | 0.097875 | 14 /<br>0Â Â Â Â Â  | Tetrahydrocannabivarin |
| Sodium channel protein type II alpha subunit                   | SCN2A                      | Q99250                     | CHEMBL4187    | Voltage-gated ion channel           | 0.097875 | 23 /<br>0Â Â Â Â Â  | Tetrahydrocannabivarin |
| Prostanoid EP1 receptor                                        | PTGER1                     | P34995                     | CHEMBL1811    | Family A G protein-coupled receptor | 0.097875 | 25 /<br>0Â Â Â Â Â  | Tetrahydrocannabivarin |
| Calcium-activated potassium channel subunit alpha-1            | KCNMA1                     | Q12791                     | CHEMBL4304    | Voltage-gated ion channel           | 0.097875 | 11 /<br>0Â Â Â Â Â  | Tetrahydrocannabivarin |

|                                                       |        |        |               |                                     |   |         |                      |
|-------------------------------------------------------|--------|--------|---------------|-------------------------------------|---|---------|----------------------|
| Cholecystokinin B receptor                            | CCKBR  | P32239 | CHEMBL298     | Family A G protein-coupled receptor | 0 | 146 / 0 | Tetrahydrocannabinol |
| Monoglyceride lipase                                  | MGLL   | Q99685 | CHEMBL4191    | Enzyme                              | 0 | 11 / 0  | Tetrahydrocannabinol |
| Orexin receptor 2                                     | HCRT2  | O43614 | CHEMBL4792    | Family A G protein-coupled receptor | 0 | 207 / 0 | Tetrahydrocannabinol |
| Orexin receptor 1                                     | HCRT1  | O43613 | CHEMBL5113    | Family A G protein-coupled receptor | 0 | 170 / 0 | Tetrahydrocannabinol |
| G-protein coupled receptor 55                         | GPR55  | Q9Y2T6 | CHEMBL1075322 | Family A G protein-coupled receptor | 0 | 8 / 2   | Tetrahydrocannabinol |
| Tyrosine-protein kinase JAK3                          | JAK3   | P52333 | CHEMBL2148    | Kinase                              | 0 | 166 / 0 | Tetrahydrocannabinol |
| Tyrosine-protein kinase JAK2                          | JAK2   | O60674 | CHEMBL2971    | Kinase                              | 0 | 159 / 0 | Tetrahydrocannabinol |
| Macrophage migration inhibitory factor                | MIF    | P14174 | CHEMBL2085    | Enzyme                              | 0 | 3 / 0   | Tetrahydrocannabinol |
| Peregrin                                              | BRPF1  | P55201 | CHEMBL3132741 | Reader                              | 0 | 19 / 0  | Tetrahydrocannabinol |
| Histone deacetylase 2                                 | HDAC2  | Q92769 | CHEMBL1937    | Eraser                              | 0 | 11 / 0  | Tetrahydrocannabinol |
| Serine/threonine-protein kinase/endoribonuclease IRE1 | ERN1   | O75460 | CHEMBL1163101 | Enzyme                              | 0 | 2 / 0   | Tetrahydrocannabinol |
| Myosin light chain kinase, smooth muscle              | MYLK   | Q15746 | CHEMBL2428    | Kinase                              | 0 | 6 / 0   | Tetrahydrocannabinol |
| Endothelin-converting enzyme 2                        | ECE2   | O60344 | CHEMBL5890    | Protease                            | 0 | 1 / 0   | Tetrahydrocannabinol |
| Thromboxane A2 receptor                               | TBXA2R | P21731 | CHEMBL2069    | Family A G protein-coupled receptor | 0 | 4 / 0   | Tetrahydrocannabinol |
| Thymidylate synthase                                  | TYMS   | P04818 | CHEMBL1952    | Transferase                         | 0 | 20 / 0  | Tetrahydrocannabinol |
| Serine/threonine-protein kinase PAK 1                 | PAK1   | Q13153 | CHEMBL4600    | Kinase                              | 0 | 1 / 0   | Tetrahydrocannabinol |
| Cholesteryl ester transfer protein                    | CETP   | P11597 | CHEMBL3572    | Other ion channel                   | 0 | 4 / 4   | Tetrahydrocannabinol |
| Prenyl protein specific protease                      | RCE1   | Q9Y256 | CHEMBL3411    | Protease                            | 0 | 6 / 0   | Tetrahydrocannabinol |
| Gonadotropin-releasing hormone receptor               | GNRHR  | P30968 | CHEMBL1855    | Family A G protein-coupled receptor | 0 | 4 / 0   | Tetrahydrocannabinol |
| Hormone sensitive lipase                              | LIPE   | Q05469 | CHEMBL3590    | Enzyme                              | 0 | 50 / 0  | Tetrahydrocannabinol |
| Bombesin receptor subtype-3                           | BRS3   | P32247 | CHEMBL4080    | Family A G protein-                 | 0 | 1 / 0   | Tetrahydrocannabinol |

|                                                                             |                |                  |               |                                     |   |         |                        |
|-----------------------------------------------------------------------------|----------------|------------------|---------------|-------------------------------------|---|---------|------------------------|
|                                                                             |                |                  |               | coupled receptor                    |   |         |                        |
| Leucine-rich repeat serine/threonine-protein kinase 2                       | LRRK2          | Q5S007           | CHEMBL1075104 | Kinase                              | 0 | 24 / 0  | Tetrahydrocannabivarin |
| Serine/threonine-protein kinase PIM1                                        | PIM1           | P11309           | CHEMBL2147    | Kinase                              | 0 | 66 / 0  | Tetrahydrocannabivarin |
| Voltage-gated potassium channel subunit Kv1.5                               | KCNA5          | P22460           | CHEMBL4306    | Voltage-gated ion channel           | 0 | 99 / 0  | Tetrahydrocannabivarin |
| Serine/threonine-protein kinase PIM2                                        | PIM2           | Q9P1W9           | CHEMBL4523    | Kinase                              | 0 | 58 / 0  | Tetrahydrocannabivarin |
| Microtubule-associated protein tau                                          | MAPT           | P10636           | CHEMBL1293224 | Unclassified protein                | 0 | 2 / 0   | Tetrahydrocannabivarin |
| Cyclin-dependent kinase 5/CDK5 activator 1                                  | CDK5R1<br>CDK5 | Q15078<br>Q00535 | CHEMBL1907600 | Kinase                              | 0 | 65 / 0  | Tetrahydrocannabivarin |
| Sodium channel protein type V alpha subunit                                 | SCN5A          | Q14524           | CHEMBL1980    | Voltage-gated ion channel           | 0 | 15 / 0  | Tetrahydrocannabivarin |
| Serotonin 6 (5-HT6) receptor                                                | HTR6           | P50406           | CHEMBL3371    | Family A G protein-coupled receptor | 0 | 71 / 0  | Tetrahydrocannabivarin |
| Serine/threonine-protein kinase Aurora-C                                    | AURKC          | Q9UQB9           | CHEMBL3935    | Kinase                              | 0 | 9 / 0   | Tetrahydrocannabivarin |
| Serine/threonine-protein kinase Aurora-A                                    | AURKA          | O14965           | CHEMBL4722    | Kinase                              | 0 | 19 / 0  | Tetrahydrocannabivarin |
| Protoporphyrinogen oxidase                                                  | PPOX           | P50336           | CHEMBL1926488 | Oxidoreductase                      | 0 | 1 / 0   | Tetrahydrocannabivarin |
| Tumor necrosis factor receptor R1                                           | TNFRSF1A       | P19438           | CHEMBL3378    | Membrane receptor                   | 0 | 2 / 0   | Tetrahydrocannabivarin |
| G-protein coupled bile acid receptor 1                                      | GPBAR1         | Q8TDU6           | CHEMBL5409    | Family A G protein-coupled receptor | 0 | 24 / 0  | Tetrahydrocannabivarin |
| Serine/threonine-protein kinase AKT                                         | AKT1           | P31749           | CHEMBL4282    | Kinase                              | 0 | 14 / 17 | Tetrahydrocannabivarin |
| Monoamine oxidase A                                                         | MAOA           | P21397           | CHEMBL1951    | Oxidoreductase                      | 0 | 67 / 0  | Tetrahydrocannabivarin |
| Cathepsin (V and K)                                                         | CTSV           | O60911           | CHEMBL3272    | Protease                            | 0 | 6 / 0   | Tetrahydrocannabivarin |
| Androgen Receptor                                                           | AR             | P10275           | CHEMBL1871    | Nuclear receptor                    | 0 | 56 / 27 | Tetrahydrocannabivarin |
| Dual-specificity tyrosine-phosphorylation regulated kinase 1A (by homology) | DYRK1A         | Q13627           | CHEMBL2292    | Kinase                              | 0 | 38 / 0  | Tetrahydrocannabivarin |
| Serotonin 3a (5-HT3a) receptor                                              | HTR3A          | P46098           | CHEMBL1899    | Ligand-gated ion channel            | 0 | 11 / 0  | Tetrahydrocannabivarin |
| Lysosomal Pro-X carboxypeptidase                                            | PRCP           | P42785           | CHEMBL2335    | Protease                            | 0 | 8 / 0   | Tetrahydrocannabivarin |
| Kinesin-like protein 1                                                      | KIF11          | P52732           | CHEMBL4581    | Other cytosolic protein             | 0 | 26 / 0  | Tetrahydrocannabivarin |

|                                           |                                 |                                      |               |                                     |   |         |                        |
|-------------------------------------------|---------------------------------|--------------------------------------|---------------|-------------------------------------|---|---------|------------------------|
| Muscarinic acetylcholine receptor M4      | CHRM4                           | P08173                               | CHEMBL1821    | Family A G protein-coupled receptor | 0 | 7 / 0   | Tetrahydrocannabivarin |
| Beta secretase 2                          | BACE2                           | Q9Y5Z0                               | CHEMBL2525    | Protease                            | 0 | 22 / 0  | Tetrahydrocannabivarin |
| Serine/threonine-protein kinase mTOR      | MTOR                            | P42345                               | CHEMBL2842    | Kinase                              | 0 | 25 / 0  | Tetrahydrocannabivarin |
| PI3-kinase p110-alpha subunit             | PIK3CA                          | P42336                               | CHEMBL4005    | Enzyme                              | 0 | 54 / 0  | Tetrahydrocannabivarin |
| Pyruvate kinase isozymes M1/M2            | PKM                             | P14618                               | CHEMBL1075189 | Enzyme                              | 0 | 3 / 0   | Tetrahydrocannabivarin |
| Corticotropin releasing factor receptor 1 | CRHR1                           | P34998                               | CHEMBL1800    | Family B G protein-coupled receptor | 0 | 68 / 0  | Tetrahydrocannabivarin |
| GABA-A receptor; alpha-1/beta-3/gamma-2   | GABRB3<br>GABRG2<br>GABRA1      | P28472<br>P18507<br>P14867           | CHEMBL2094121 | Ligand-gated ion channel            | 0 | 51 / 0  | Tetrahydrocannabivarin |
| Cyclin-dependent kinase 1/cyclin B        | CCNB3<br>CDK1<br>CCNB1<br>CCNB2 | Q8WWL7<br>P06493<br>P14635<br>O95067 | CHEMBL2094127 | Other cytosolic protein             | 0 | 35 / 0  | Tetrahydrocannabivarin |
| Norepinephrine transporter                | SLC6A2                          | P23975                               | CHEMBL222     | Electrochemical transporter         | 0 | 9 / 0   | Tetrahydrocannabivarin |
| Phosphodiesterase 2A                      | PDE2A                           | O00408                               | CHEMBL2652    | Phosphodiesterase                   | 0 | 44 / 0  | Tetrahydrocannabivarin |
| Tyrosine-protein kinase JAK1              | JAK1                            | P23458                               | CHEMBL2835    | Kinase                              | 0 | 64 / 0  | Tetrahydrocannabivarin |
| JAK3/JAK1                                 | JAK3<br>JAK1                    | P52333<br>P23458                     | CHEMBL3038491 | Kinase                              | 0 | 15 / 0  | Tetrahydrocannabivarin |
| Phosphodiesterase 10A                     | PDE10A                          | Q9Y233                               | CHEMBL4409    | Phosphodiesterase                   | 0 | 265 / 0 | Tetrahydrocannabivarin |
| Egl nine homolog 1                        | EGLN1                           | Q9GZT9                               | CHEMBL5697    | Oxidoreductase                      | 0 | 7 / 0   | Tetrahydrocannabivarin |
| Cholecystokinin A receptor (by homology)  | CCKAR                           | P32238                               | CHEMBL1901    | Family A G protein-coupled receptor | 0 | 12 / 0  | Tetrahydrocannabivarin |
| PI3-kinase p110-alpha/p85-alpha           | PIK3CA<br>PIK3R1                | P42336<br>P27986                     | CHEMBL2111367 | Enzyme                              | 0 | 6 / 0   | Tetrahydrocannabivarin |
| Bromodomain-containing protein 1          | BRD1                            | O95696                               | CHEMBL2176774 | Reader                              | 0 | 6 / 0   | Tetrahydrocannabivarin |
| Adenosine A2a receptor                    | ADORA2A                         | P29274                               | CHEMBL251     | Family A G protein-coupled receptor | 0 | 101 / 0 | Tetrahydrocannabivarin |
| Transcription intermediary factor 1-alpha | TRIM24                          | O15164                               | CHEMBL3108638 | Reader                              | 0 | 10 / 0  | Tetrahydrocannabivarin |
| Histone deacetylase 9                     | HDAC9                           | Q9UKV0                               | CHEMBL4145    | Eraser                              | 0 | 5 / 0   | Tetrahydrocannabivarin |



|                                                 |                            |                            |               |                                     |   |        |                      |
|-------------------------------------------------|----------------------------|----------------------------|---------------|-------------------------------------|---|--------|----------------------|
| GABA-A receptor;<br>alpha-3/beta-3/gamma-2      | GABRB3<br>GABRA3<br>GABRG2 | P28472<br>P34903<br>P18507 | CHEMBL2094120 | Ligand-gated ion channel            | 0 | 58 / 0 | Tetrahydrocannabinol |
| GABA-A receptor;<br>alpha-5/beta-3/gamma-2      | GABRB3<br>GABRG2<br>GABRA5 | P28472<br>P18507<br>P31644 | CHEMBL2094122 | Ligand-gated ion channel            | 0 | 58 / 0 | Tetrahydrocannabinol |
| GABA-A receptor;<br>alpha-2/beta-3/gamma-2      | GABRA2<br>GABRB3<br>GABRG2 | P47869<br>P28472<br>P18507 | CHEMBL2094130 | Ligand-gated ion channel            | 0 | 54 / 0 | Tetrahydrocannabinol |
| Trace amine-associated receptor 1 (by homology) | TAAR1                      | Q96RJ0                     | CHEMBL5857    | Family A G protein-coupled receptor | 0 | 27 / 0 | Tetrahydrocannabinol |
| Tyrosine-protein kinase receptor FLT3           | FLT3                       | P36888                     | CHEMBL1974    | Kinase                              | 0 | 29 / 0 | Tetrahydrocannabinol |
| Nitric-oxide synthase, brain                    | NOS1                       | P29475                     | CHEMBL3568    | Enzyme                              | 0 | 52 / 0 | Tetrahydrocannabinol |
| Bcl2-antagonist of cell death (BAD)             | BAD                        | Q92934                     | CHEMBL3817    | Other cytosolic protein             | 0 | 6 / 0  | Tetrahydrocannabinol |
| Nitric-oxide synthase, endothelial              | NOS3                       | P29474                     | CHEMBL4803    | Enzyme                              | 0 | 19 / 0 | Tetrahydrocannabinol |

**Table S3. Disgenet-predicted disease targets for rheumatoid arthritis**

| Disease              | Disease id | Gene   | Gene id | UniProt | Gene Full Name                                    | Protein Class | N_diseases_g | DSI_g | DPI_g | pLI      | Score_gda | EL_gda | EI_gda | N_PMI_Ds | N_SNPs_gda | Filters_Ref | Last_Ref |
|----------------------|------------|--------|---------|---------|---------------------------------------------------|---------------|--------------|-------|-------|----------|-----------|--------|--------|----------|------------|-------------|----------|
| Rheumatoid Arthritis | C0003873   | PTPN22 | 26191   | Q9Y2R2  | protein tyrosine phosphatase non-receptor type 22 |               | 400          | 0.438 | 0.486 | 3.49E-21 | 0.7       |        | 0.899  | 158      | 7          | 2004        | 2019     |
| Rheumatoid Ar        | C0003873   | SLC2A4 | 6583    | Q9H015  | solute carrier family 22 member 4                 | Transporter   | 90           | 0.603 | 0.679 | 1.83E-08 | 0.7       |        | 0.857  | 21       | 3          | 2003        | 2019     |

|                                                 |                          |                |                       |            |                                                |                                                              |          |                       |                       |                                  |          |  |                   |          |    |          |                  |
|-------------------------------------------------|--------------------------|----------------|-----------------------|------------|------------------------------------------------|--------------------------------------------------------------|----------|-----------------------|-----------------------|----------------------------------|----------|--|-------------------|----------|----|----------|------------------|
| thr<br>itis                                     |                          |                |                       |            |                                                |                                                              |          |                       |                       |                                  |          |  |                   |          |    |          |                  |
| Rh<br>eu<br>ma<br>toi<br>d<br>Ar<br>thr<br>itis | C<br>00<br>03<br>87<br>3 | TN<br>F        | 7<br>1<br>2<br>4      | P0137<br>5 | tumor<br>necrosis<br>factor                    | Sig<br>nal<br>ing                                            | 27<br>24 | 0<br>.<br>2<br>3<br>1 | 0<br>.<br>9<br>6<br>2 | 0.<br>8<br>0<br>3<br>3           | 0.<br>7  |  | 0.<br>9<br>7<br>5 | 10<br>14 | 8  | 19<br>89 | 2<br>0<br>2<br>0 |
| Rh<br>eu<br>ma<br>toi<br>d<br>Ar<br>thr<br>itis | C<br>00<br>03<br>87<br>3 | CR<br>P        | 1<br>4<br>0<br>1      | P0274<br>1 | C-reactive<br>protein                          |                                                              | 14<br>83 | 0<br>.<br>2<br>9<br>9 | 0<br>.<br>9<br>6<br>2 | 0.<br>0<br>3<br>6<br>9<br>7      | 0.<br>6  |  | 0.<br>9<br>5<br>5 | 19<br>9  | 1  | 19<br>89 | 2<br>0<br>2<br>0 |
| Rh<br>eu<br>ma<br>toi<br>d<br>Ar<br>thr<br>itis | C<br>00<br>03<br>87<br>3 | IL6<br>ST      | 3<br>5<br>7<br>2      | P4018<br>9 | interleuk<br>in 6<br>signal<br>transduc<br>er  | Sig<br>nal<br>ing                                            | 26<br>0  | 0<br>.<br>4<br>7<br>5 | 0<br>.<br>8<br>0<br>8 | 0.<br>9<br>9<br>7<br>8           | 0.<br>59 |  | 0.<br>9<br>0<br>9 | 11       | 1  | 20<br>00 | 2<br>0<br>2<br>0 |
| Rh<br>eu<br>ma<br>toi<br>d<br>Ar<br>thr<br>itis | C<br>00<br>03<br>87<br>3 | CC<br>R6       | 1<br>2<br>3<br>5      | P5168<br>4 | C-C<br>motif<br>chemoki<br>ne<br>receptor<br>6 | G-<br>pro<br>tei<br>n<br>co<br>upl<br>ed<br>rec<br>ept<br>or | 23<br>1  | 0<br>.<br>4<br>8<br>5 | 0<br>.<br>8<br>0<br>8 | 0.<br>0<br>5<br>7<br>7           | 0.<br>5  |  | 1                 | 27       | 8  | 20<br>01 | 2<br>0<br>1<br>9 |
| Rh<br>eu<br>ma<br>toi<br>d<br>Ar<br>thr<br>itis | C<br>00<br>03<br>87<br>3 | FC<br>GR<br>2A | 2<br>2<br>1<br>2      | P1231<br>8 | Fc<br>fragmen<br>t of IgG<br>receptor<br>IIa   | Ce<br>ll<br>ad<br>hes<br>ion                                 | 22<br>7  | 0<br>.<br>4<br>8      | 0<br>.<br>7<br>6<br>9 | 2.<br>0<br>1<br>E<br>-<br>0<br>6 | 0.<br>5  |  | 0.<br>8<br>5<br>2 | 27       | 3  | 20<br>02 | 2<br>0<br>2<br>0 |
| Rh<br>eu<br>ma<br>toi<br>d<br>Ar<br>thr<br>itis | C<br>00<br>03<br>87<br>3 | PA<br>DI4      | 2<br>3<br>5<br>6<br>9 | Q9U<br>M07 | peptidyl<br>arginine<br>deiminase 4            |                                                              | 19<br>6  | 0<br>.<br>4<br>9<br>4 | 0<br>.<br>8<br>0<br>8 | 4.<br>6<br>E<br>-<br>1<br>6      | 0.<br>5  |  | 0.<br>9<br>1<br>2 | 12<br>5  | 10 | 20<br>03 | 2<br>0<br>2<br>0 |
| Rh<br>eu                                        | C<br>00                  | HL<br>A-       | 3<br>1                | P0444<br>0 | major<br>histoco                               | Im<br>mu                                                     | 32<br>4  | 0<br>.<br>.           | 0<br>.<br>.           | 5.<br>3                          | 0.<br>5  |  | 0.<br>9           | 32       | 62 | 19<br>88 | 2<br>0           |

|                               |                          |                      |                  |            |                                                                               |                                             |          |                       |                       |                                  |         |  |                   |         |   |          |                  |
|-------------------------------|--------------------------|----------------------|------------------|------------|-------------------------------------------------------------------------------|---------------------------------------------|----------|-----------------------|-----------------------|----------------------------------|---------|--|-------------------|---------|---|----------|------------------|
| matoid<br>Arthritis           | 03<br>87<br>3            | DP<br>B1             | 1<br>5           |            | mpatibility<br>complex<br>, class II,<br>DP beta<br>1                         | ne<br>res<br>po<br>nse                      |          | 4<br>5<br>3           | 9<br>2<br>3           | 3<br>E<br>-<br>1<br>0            |         |  | 3<br>8            |         |   |          | 2<br>0           |
| Rheuma<br>matoid<br>Arthritis | C<br>00<br>03<br>87<br>3 | HL<br>A-<br>DR<br>B1 | 3<br>1<br>2<br>3 | P0191<br>1 | major<br>histoco<br>mpatibil<br>ity<br>complex<br>, class II,<br>DR beta<br>1 | Im<br>mu<br>ne<br>res<br>po<br>nse          | 10<br>18 | 0<br>.<br>3<br>3<br>3 | 0<br>.<br>9<br>2<br>3 | 0.<br>0<br>1<br>1                | 0.<br>5 |  | 0.<br>9<br>3<br>6 | 57<br>5 | 7 | 19<br>89 | 2<br>0<br>2<br>0 |
| Rheuma<br>matoid<br>Arthritis | C<br>00<br>03<br>87<br>3 | IL2<br>RA            | 3<br>5<br>5<br>9 | P0158<br>9 | interleuk<br>in 2<br>receptor<br>subunit<br>alpha                             | Re<br>ce<br>pto<br>r                        | 54<br>0  | 0<br>.<br>3<br>8<br>9 | 0<br>.<br>8<br>8<br>5 | 0.<br>0<br>5<br>4<br>7<br>0<br>9 | 0.<br>5 |  | 1                 | 32      | 3 | 19<br>92 | 2<br>0<br>1<br>9 |
| Rheuma<br>matoid<br>Arthritis | C<br>00<br>03<br>87<br>3 | IL6<br>R             | 3<br>5<br>7<br>0 | P0888<br>7 | interleuk<br>in 6<br>receptor                                                 | Sig<br>nal<br>ing                           | 26<br>1  | 0<br>.<br>4<br>7<br>1 | 0<br>.<br>8<br>4<br>6 | 3.<br>1<br>7<br>E<br>-<br>0<br>5 | 0.<br>5 |  | 0.<br>9<br>7<br>1 | 34      | 5 | 20<br>01 | 2<br>0<br>1<br>9 |
| Rheuma<br>matoid<br>Arthritis | C<br>00<br>03<br>87<br>3 | IL1<br>0             | 3<br>5<br>8<br>6 | P2230<br>1 | interleukin 10                                                                |                                             | 16<br>79 | 0<br>.<br>2<br>8<br>1 | 0<br>.<br>9<br>2<br>3 | 0.<br>0<br>5<br>8<br>8<br>7      | 0.<br>5 |  | 0.<br>9<br>4<br>6 | 12<br>9 | 3 | 19<br>94 | 2<br>0<br>2<br>0 |
| Rheuma<br>matoid<br>Arthritis | C<br>00<br>03<br>87<br>3 | IRF<br>5             | 3<br>6<br>6<br>3 | Q135<br>68 | interfero<br>n<br>regulato<br>ry factor<br>5                                  | Tr<br>ans<br>cri<br>pti<br>on<br>fac<br>tor | 22<br>6  | 0<br>.<br>4<br>8<br>9 | 0<br>.<br>7<br>3<br>1 | 0.<br>0<br>9<br>0<br>3<br>7      | 0.<br>5 |  | 0.<br>9<br>0<br>6 | 32      | 6 | 20<br>06 | 2<br>0<br>1<br>9 |
| Rheuma<br>matoid<br>Arthritis | C<br>00<br>03<br>87<br>3 | CII<br>TA            | 4<br>2<br>6<br>1 | P3307<br>6 | class II major<br>histocompatib<br>ility complex<br>transactivator            |                                             | 14<br>9  | 0<br>.<br>5<br>3<br>6 | 0<br>.<br>8<br>0<br>8 | 1.<br>3<br>6<br>E<br>-<br>0<br>7 | 0.<br>5 |  | 0.<br>5<br>3<br>3 | 15      | 3 | 20<br>06 | 2<br>0<br>1<br>7 |

|                      |          |                  |      |        |                                                    |                      |     |       |       |       |      |       |       |    |      |      |      |
|----------------------|----------|------------------|------|--------|----------------------------------------------------|----------------------|-----|-------|-------|-------|------|-------|-------|----|------|------|------|
| Rheumatoid Arthritis | C0003873 | STAT4            | 6775 | Q14765 | signal transducer and activator of transcription 4 | Nucleic acid binding | 316 | 0.471 | 0.762 | 0.75  |      | 0.889 | 63    | 9  | 2000 | 2019 |      |
| Rheumatoid Arthritis | C0003873 | TNF- $\alpha$ P3 | 7128 | P21580 | TNF- $\alpha$ induced protein 3                    | Enzyme               | 212 | 0.481 | 0.897 | 0.972 | 0.5  |       | 1     | 35 | 8    | 2007 | 2018 |
| Rheumatoid Arthritis | C0003873 | TRAF1            | 7185 | Q13077 | TNF receptor associated factor 1                   | Signaling            | 119 | 0.554 | 0.731 | 0.764 | 0.5  |       | 0.85  | 40 | 3    | 2007 | 2019 |
| Rheumatoid Arthritis | C0003873 | TRAF6            | 7189 | Q9Y4K3 | TNF receptor associated factor 6                   | Signaling            | 254 | 0.472 | 0.803 | 0.979 | 0.5  |       | 1     | 13 | 1    | 2008 | 2019 |
| Rheumatoid Arthritis | C0003873 | CD28             | 940  | P10747 | CD28 molecule                                      |                      | 364 | 0.436 | 0.857 | 0.979 | 0.5  |       | 1     | 36 | 2    | 1996 | 2018 |
| Rheumatoid Arthritis | C0003873 | CD40             | 958  | P25942 | CD40 molecule                                      |                      | 528 | 0.396 | 0.846 | 0.903 | 0.5  |       | 0.848 | 33 | 5    | 2002 | 2019 |
| Rheumatoid Ar        | C0003873 | PTPN2            | 5771 | P17706 | protein tyrosine phosphatase non-receptor type 2   |                      | 134 | 0.538 | 0.692 | 0.953 | 0.49 |       | 1     | 13 | 4    | 2012 | 2019 |

|                                                 |                          |                 |                  |            |                                                                              |                                             |         |                       |                       |                                  |          |  |                   |    |   |          |                  |
|-------------------------------------------------|--------------------------|-----------------|------------------|------------|------------------------------------------------------------------------------|---------------------------------------------|---------|-----------------------|-----------------------|----------------------------------|----------|--|-------------------|----|---|----------|------------------|
| thr<br>itis                                     |                          |                 |                  |            |                                                                              |                                             |         |                       |                       |                                  |          |  |                   |    |   |          |                  |
| Rh<br>eu<br>ma<br>toi<br>d<br>Ar<br>thr<br>itis | C<br>00<br>03<br>87<br>3 | TY<br>K2        | 7<br>2<br>9<br>7 | P2959<br>7 | tyrosine<br>kinase 2                                                         | Ki<br>nas<br>e                              | 17<br>2 | 0<br>.<br>5<br>0<br>5 | 0<br>.<br>7<br>6<br>9 | 4.<br>5<br>E<br>-<br>0<br>8      | 0.<br>49 |  | 1                 | 15 | 3 | 20<br>07 | 2<br>0<br>1<br>9 |
| Rh<br>eu<br>ma<br>toi<br>d<br>Ar<br>thr<br>itis | C<br>00<br>03<br>87<br>3 | RU<br>NX<br>1   | 8<br>6<br>1      | Q011<br>96 | RUNX<br>family<br>transcrip<br>tion<br>factor 1                              | Tr<br>ans<br>cri<br>pti<br>on<br>fac<br>tor | 41<br>2 | 0<br>.<br>4<br>2<br>5 | 0<br>.<br>8<br>0<br>8 | 0.<br>6<br>5<br>3<br>7<br>7      | 0.<br>49 |  | 0.<br>7<br>8<br>6 | 14 | 4 | 20<br>03 | 2<br>0<br>1<br>9 |
| Rh<br>eu<br>ma<br>toi<br>d<br>Ar<br>thr<br>itis | C<br>00<br>03<br>87<br>3 | PT<br>PR<br>C   | 5<br>7<br>8<br>8 | P0857<br>5 | protein<br>tyrosine<br>phospha<br>tase<br>receptor<br>type C                 | En<br>zy<br>me                              | 36<br>6 | 0<br>.<br>4<br>3<br>5 | 0<br>.<br>8<br>0<br>8 | 1                                | 0.<br>48 |  | 1                 | 10 | 1 | 19<br>91 | 2<br>0<br>1<br>7 |
| Rh<br>eu<br>ma<br>toi<br>d<br>Ar<br>thr<br>itis | C<br>00<br>03<br>87<br>3 | AG<br>ER        | 1<br>7<br>7      | Q151<br>09 | advance<br>d<br>glycosyl<br>ation<br>end-<br>product<br>specific<br>receptor | Re<br>ce<br>pto<br>r                        | 45<br>0 | 0<br>.<br>4<br>2      | 0<br>.<br>8<br>8<br>5 | 6.<br>3<br>5<br>E<br>-<br>1<br>6 | 0.<br>47 |  | 1                 | 10 | 5 | 20<br>02 | 2<br>0<br>1<br>4 |
| Rh<br>eu<br>ma<br>toi<br>d<br>Ar<br>thr<br>itis | C<br>00<br>03<br>87<br>3 | IL2<br>RB       | 3<br>5<br>6<br>0 | P1478<br>4 | interleuk<br>in 2<br>receptor<br>subunit<br>beta                             | Re<br>ce<br>pto<br>r                        | 22<br>6 | 0<br>.<br>4<br>9<br>1 | 0<br>.<br>8<br>4<br>6 | 0.<br>2<br>9<br>0<br>9<br>5      | 0.<br>47 |  | 0.<br>9<br>0<br>9 | 11 | 4 | 19<br>92 | 2<br>0<br>1<br>9 |
| Rh<br>eu<br>ma<br>toi<br>d<br>Ar<br>thr<br>itis | C<br>00<br>03<br>87<br>3 | NF<br>KB<br>IL1 | 4<br>7<br>9<br>5 | Q9UB<br>C1 | NFKB<br>inhibitor like 1                                                     |                                             | 41      | 0<br>.<br>6<br>5<br>3 | 0<br>.<br>6<br>1<br>5 | 0.<br>0<br>2<br>5<br>1<br>5      | 0.<br>47 |  | 1                 | 10 | 4 | 20<br>01 | 2<br>0<br>1<br>1 |
| Rh<br>eu<br>ma<br>toi                           | C<br>00<br>03            | AF<br>F3        | 3<br>8<br>9<br>9 | P5182<br>6 | AF4/FM<br>R2<br>family                                                       | Tr<br>ans<br>cri<br>pti                     | 77      | 0<br>.<br>6           | 0<br>.<br>6           | 0.<br>9<br>9<br>9                | 0.<br>46 |  | 1                 | 11 | 5 | 20<br>09 | 2<br>0<br>1<br>6 |

|                                                 |                          |                |                       |            |                                                                    |                                             |         |                       |                       |                                  |          |  |                   |    |   |          |                  |
|-------------------------------------------------|--------------------------|----------------|-----------------------|------------|--------------------------------------------------------------------|---------------------------------------------|---------|-----------------------|-----------------------|----------------------------------|----------|--|-------------------|----|---|----------|------------------|
| d<br>Ar<br>thr<br>itis                          | 87<br>3                  |                |                       |            | member<br>3                                                        | on<br>fac<br>tor                            |         | 2<br>3                | 9<br>2                | 9<br>6                           |          |  |                   |    |   |          |                  |
| Rh<br>eu<br>ma<br>toi<br>d<br>Ar<br>thr<br>itis | C<br>00<br>03<br>87<br>3 | RE<br>L        | 5<br>9<br>6<br>6      | Q048<br>64 | REL<br>proto-<br>oncogen<br>e, NF-<br>kB<br>subunit                | Tr<br>ans<br>cri<br>pti<br>on<br>fac<br>tor | 90      | 0<br>.<br>5<br>7<br>9 | 0<br>.<br>6<br>9<br>2 | 0.<br>9<br>8<br>3<br>6           | 0.<br>46 |  | 0.<br>9<br>0<br>9 | 11 | 2 | 20<br>09 | 2<br>0<br>1<br>9 |
| Rh<br>eu<br>ma<br>toi<br>d<br>Ar<br>thr<br>itis | C<br>00<br>03<br>87<br>3 | BL<br>K        | 6<br>4<br>0           | P5145<br>1 | BLK<br>proto-<br>oncogen<br>e, Src<br>family<br>tyrosine<br>kinase | Ki<br>nas<br>e                              | 86      | 0<br>.<br>5<br>8<br>5 | 0<br>.<br>7<br>6<br>9 | 8.<br>3<br>5<br>E<br>-<br>1<br>4 | 0.<br>46 |  | 1                 | 9  | 3 | 20<br>09 | 2<br>0<br>1<br>6 |
| Rh<br>eu<br>ma<br>toi<br>d<br>Ar<br>thr<br>itis | C<br>00<br>03<br>87<br>3 | CD<br>K6       | 1<br>0<br>2<br>1      | Q005<br>34 | cyclin<br>depend<br>ent kinase<br>6                                | Ki<br>nas<br>e                              | 26<br>6 | 0<br>.<br>4<br>7<br>1 | 0<br>.<br>7<br>3<br>1 | 0.<br>9<br>8<br>3<br>1<br>5      | 0.<br>44 |  | 0.<br>7<br>1<br>4 | 7  | 2 | 20<br>08 | 2<br>0<br>1<br>9 |
| Rh<br>eu<br>ma<br>toi<br>d<br>Ar<br>thr<br>itis | C<br>00<br>03<br>87<br>3 | CD<br>244      | 5<br>1<br>7<br>4<br>4 | Q9BZ<br>W8 | CD244<br>molecule                                                  |                                             | 42      | 0<br>.<br>6<br>5<br>3 | 0<br>.<br>5           | 0.<br>0<br>5<br>7<br>2<br>8<br>8 | 0.<br>44 |  | 0.<br>5           | 4  | 2 | 20<br>08 | 2<br>0<br>1<br>1 |
| Rh<br>eu<br>ma<br>toi<br>d<br>Ar<br>thr<br>itis | C<br>00<br>03<br>87<br>3 | M<br>ME<br>L1  | 7<br>9<br>2<br>5<br>8 | Q495<br>T6 | membra<br>ne<br>metalloe<br>ndopepti<br>dase like<br>1             | En<br>zy<br>me                              | 74      | 0<br>.<br>6<br>0<br>6 | 0<br>.<br>6<br>9<br>2 | 1.<br>2<br>4<br>E<br>-<br>2<br>2 | 0.<br>44 |  | 0.<br>9<br>0<br>9 | 11 | 5 | 20<br>08 | 2<br>0<br>1<br>9 |
| Rh<br>eu<br>ma<br>toi<br>d<br>Ar<br>thr<br>itis | C<br>00<br>03<br>87<br>3 | AN<br>KR<br>D5 | 7<br>9<br>7<br>2<br>2 | Q3KP<br>44 | ankyrin repeat<br>domain 55                                        |                                             | 46      | 0<br>.<br>6<br>5      | 0<br>.<br>4<br>6<br>2 | 6.<br>7<br>6<br>E<br>-<br>0<br>8 | 0.<br>44 |  | 1                 | 11 | 3 | 20<br>10 | 2<br>0<br>1<br>9 |

|                      |          |          |        |        |                                 |                      |     |       |       |         |      |  |   |   |   |      |      |
|----------------------|----------|----------|--------|--------|---------------------------------|----------------------|-----|-------|-------|---------|------|--|---|---|---|------|------|
| Rheumatoid Arthritis | C0003873 | GATA3    | 2625   | P23771 | GATA binding protein 3          |                      | 429 | 0.415 | 0.846 | 0.887   | 0.43 |  | 1 | 7 | 3 | 2005 | 2019 |
| Rheumatoid Arthritis | C0003873 | NFKBIE   | 4794   | O00221 | NFKB inhibitor epsilon          |                      | 26  | 0.75  | 0.385 | 0.7098  | 0.42 |  | 1 | 3 | 2 | 2012 | 2016 |
| Rheumatoid Arthritis | C0003873 | PLD4     | 122618 | Q96BZ4 | phospholipase D family member 4 |                      | 12  | 0.78  | 0.5   | 7.3E-13 | 0.41 |  | 1 | 3 | 2 | 2012 | 2018 |
| Rheumatoid Arthritis | C0003873 | DNASE1L3 | 1776   | Q13609 | deoxyribonuclease 1 like 3      |                      | 126 | 0.555 | 0.769 | 3E-05   | 0.41 |  | 1 | 4 | 1 | 2012 | 2019 |
| Rheumatoid Arthritis | C0003873 | KIF5A    | 3798   | Q12840 | kinesin family member 5A        | Cellular structure   | 112 | 0.593 | 0.731 | 0.995   | 0.41 |  | 1 | 4 | 1 | 2008 | 2014 |
| Rheumatoid Arthritis | C0003873 | ARID5B   | 84159  | Q14865 | AT-rich interaction domain 5B   | Transcription factor | 56  | 0.638 | 0.5   | 1       | 0.41 |  | 1 | 6 | 3 | 2012 | 2019 |
| Rheumatoid Ar        | C0003873 | RASGRP1  | 10125  | O95267 | RAS guanyl releasing protein 1  | Enzyme modul         | 110 | 0.572 | 0.731 | 0.9654  | 0.4  |  | 1 | 4 | 2 | 2012 | 2019 |

|                                                 |                          |                |                            |            |                                                          |                                                    |          |                       |                       |                                  |         |  |                   |    |   |          |                  |
|-------------------------------------------------|--------------------------|----------------|----------------------------|------------|----------------------------------------------------------|----------------------------------------------------|----------|-----------------------|-----------------------|----------------------------------|---------|--|-------------------|----|---|----------|------------------|
| thr<br>itis                                     |                          |                |                            |            |                                                          | ato<br>r                                           |          |                       |                       |                                  |         |  |                   |    |   |          |                  |
| Rh<br>eu<br>ma<br>toi<br>d<br>Ar<br>thr<br>itis | C<br>00<br>03<br>87<br>3 | CS<br>F2       | 1<br>4<br>3<br>7           | P0414<br>1 | colony<br>stimulati<br>ng factor<br>2                    | Sig<br>nal<br>ing                                  | 10<br>28 | 0<br>.<br>3<br>3      | 0<br>.<br>9<br>6<br>2 | 0.<br>8<br>3<br>4<br>6<br>8      | 0.<br>4 |  | 1                 | 39 | 0 | 19<br>89 | 2<br>0<br>1<br>9 |
| Rh<br>eu<br>ma<br>toi<br>d<br>Ar<br>thr<br>itis | C<br>00<br>03<br>87<br>3 | CT<br>LA<br>4  | 1<br>4<br>9<br>3           | P1641<br>0 | cytotoxic T-<br>lymphocyte<br>associated<br>protein 4    |                                                    | 72<br>2  | 0<br>.<br>3<br>6<br>9 | 0<br>.<br>9<br>2<br>3 | 0.<br>9<br>4<br>0<br>8<br>5      | 0.<br>4 |  | 0.<br>9<br>3<br>1 | 58 | 3 | 19<br>98 | 2<br>0<br>1<br>9 |
| Rh<br>eu<br>ma<br>toi<br>d<br>Ar<br>thr<br>itis | C<br>00<br>03<br>87<br>3 | AC<br>AN       | 1<br>7<br>6                | P1611<br>2 | aggreca<br>n                                             | Ex<br>tra<br>cel<br>lul<br>ar<br>str<br>uct<br>ure | 18<br>7  | 0<br>.<br>5<br>2<br>8 | 0<br>.<br>8<br>4<br>6 | 1                                | 0.<br>4 |  | 1                 | 12 | 0 | 19<br>98 | 2<br>0<br>1<br>9 |
| Rh<br>eu<br>ma<br>toi<br>d<br>Ar<br>thr<br>itis | C<br>00<br>03<br>87<br>3 | RC<br>AN<br>1  | 1<br>8<br>2<br>7           | P5380<br>5 | regulato<br>r of<br>calcineu<br>rin 1                    | Sig<br>nal<br>ing                                  | 11<br>0  | 0<br>.<br>5<br>7<br>2 | 0<br>.<br>8<br>0<br>8 | 0.<br>0<br>6<br>6<br>7<br>5      | 0.<br>4 |  | 1                 | 2  | 2 | 20<br>12 | 2<br>0<br>1<br>9 |
| Rh<br>eu<br>ma<br>toi<br>d<br>Ar<br>thr<br>itis | C<br>00<br>03<br>87<br>3 | AH<br>R        | 1<br>9<br>6                | P3586<br>9 | aryl<br>hydrocar<br>bon<br>receptor                      | Tr<br>ans<br>cri<br>pti<br>on<br>fac<br>tor        | 53<br>2  | 0<br>.<br>4<br>1      | 0<br>.<br>9<br>2<br>3 | 0.<br>9<br>9<br>9<br>9           | 0.<br>4 |  | 0.<br>9<br>2<br>9 | 14 | 1 | 20<br>08 | 2<br>0<br>2<br>0 |
| Rh<br>eu<br>ma<br>toi<br>d<br>Ar<br>thr<br>itis | C<br>00<br>03<br>87<br>3 | SP<br>RE<br>D2 | 2<br>0<br>0<br>7<br>3<br>4 | Q7Z6<br>98 | sprouty<br>related<br>EVH1<br>domain<br>containi<br>ng 2 | Re<br>ce<br>pto<br>r                               | 38       | 0<br>.<br>7<br>1<br>1 | 0<br>.<br>5<br>7<br>7 | 2.<br>8<br>7<br>E<br>-<br>0<br>7 | 0.<br>4 |  | 1                 | 7  | 6 | 20<br>10 | 2<br>0<br>1<br>9 |
| Rh<br>eu<br>ma<br>toi                           | C<br>00<br>03            | EN<br>O1       | 2<br>0<br>2<br>3           | P0673<br>3 | enolase<br>1                                             | En<br>zy<br>me                                     | 23<br>1  | 0<br>.<br>4           | 0<br>.<br>8           | 1.<br>9<br>1<br>E                | 0.<br>4 |  | 0.<br>9<br>0<br>5 | 21 | 0 | 20<br>08 | 2<br>0<br>1<br>9 |



|                                                 |                          |                      |                  |            |                                                                                |                                    |          |                       |                       |                                  |         |  |                   |         |    |          |                  |
|-------------------------------------------------|--------------------------|----------------------|------------------|------------|--------------------------------------------------------------------------------|------------------------------------|----------|-----------------------|-----------------------|----------------------------------|---------|--|-------------------|---------|----|----------|------------------|
| d<br>Ar<br>thr<br>itis                          | 87<br>3                  |                      |                  |            |                                                                                |                                    |          | 8<br>1                | 8<br>5                | -<br>0<br>5                      |         |  |                   |         |    |          |                  |
| Rh<br>eu<br>ma<br>toi<br>d<br>Ar<br>thr<br>itis | C<br>00<br>03<br>87<br>3 | AN<br>XA<br>3        | 3<br>0<br>6      | P1242<br>9 | annexin A3                                                                     |                                    | 66       | 0<br>.<br>6<br>1      | 0<br>.<br>6<br>1<br>5 | 6.<br>5<br>2<br>E<br>-<br>1<br>2 | 0.<br>4 |  | 1                 | 1       | 1  | 20<br>12 | 2<br>0<br>1<br>2 |
| Rh<br>eu<br>ma<br>toi<br>d<br>Ar<br>thr<br>itis | C<br>00<br>03<br>87<br>3 | HL<br>A-<br>DQ<br>A2 | 3<br>1<br>1<br>8 | P0190<br>6 | major<br>histoco<br>mpatibil<br>ity<br>complex<br>, class II,<br>DQ<br>alpha 2 | Im<br>mu<br>ne<br>res<br>po<br>nse | 58       | 0<br>.<br>6<br>1<br>7 | 0<br>.<br>7<br>6<br>9 | 1.<br>0<br>1<br>E<br>-<br>0<br>5 | 0.<br>4 |  | 1                 | 4       | 15 | 20<br>07 | 2<br>0<br>1<br>1 |
| Rh<br>eu<br>ma<br>toi<br>d<br>Ar<br>thr<br>itis | C<br>00<br>03<br>87<br>3 | IFN<br>G             | 3<br>4<br>5<br>8 | P0157<br>9 | interferon<br>gamma                                                            |                                    | 15<br>19 | 0<br>.<br>2<br>8<br>8 | 0<br>.<br>9<br>6<br>2 | 0.<br>4<br>7<br>1<br>5<br>6      | 0.<br>4 |  | 0.<br>9<br>4<br>7 | 76      | 2  | 19<br>90 | 2<br>0<br>2<br>0 |
| Rh<br>eu<br>ma<br>toi<br>d<br>Ar<br>thr<br>itis | C<br>00<br>03<br>87<br>3 | CC<br>N1             | 3<br>4<br>9<br>1 | O006<br>22 | cellular<br>commun<br>ication<br>network<br>factor 1                           | Sig<br>nal<br>ing                  | 24<br>6  | 0<br>.<br>4<br>7<br>3 | 0<br>.<br>7<br>3<br>1 | 0.<br>7<br>1<br>3<br>8<br>8      | 0.<br>4 |  | 0.<br>9<br>2<br>9 | 14      | 0  | 20<br>06 | 2<br>0<br>1<br>9 |
| Rh<br>eu<br>ma<br>toi<br>d<br>Ar<br>thr<br>itis | C<br>00<br>03<br>87<br>3 | IL1<br>B             | 3<br>5<br>5<br>3 | P0158<br>4 | interleukin<br>beta                                                            | 1                                  | 18<br>01 | 0<br>.<br>2<br>7<br>6 | 0<br>.<br>9<br>6<br>2 | 0.<br>1<br>3<br>0<br>0<br>5      | 0.<br>4 |  | 0.<br>9<br>7<br>6 | 24<br>7 | 1  | 19<br>89 | 2<br>0<br>2<br>0 |
| Rh<br>eu<br>ma<br>toi<br>d<br>Ar<br>thr<br>itis | C<br>00<br>03<br>87<br>3 | IL1<br>RN            | 3<br>5<br>5<br>7 | P1851<br>0 | interleukin<br>receptor<br>antagonist                                          | 1                                  | 70<br>1  | 0<br>.<br>3<br>7<br>3 | 0<br>.<br>9<br>2<br>3 | 0.<br>0<br>3<br>0<br>9<br>1<br>4 | 0.<br>4 |  | 0.<br>9<br>4<br>7 | 57      | 1  | 19<br>92 | 2<br>0<br>2<br>0 |
| Rh<br>eu                                        | C<br>00                  | IL6                  | 3<br>5           | P0523<br>1 | interleukin 6                                                                  |                                    | 23<br>67 | 0<br>.<br>.           | 0<br>.<br>.           | 0.<br>3                          | 0.<br>4 |  | 0.<br>9           | 36<br>9 | 3  | 19<br>88 | 2<br>0           |

|                                                 |                          |               |                  |            |                                                 |                   |          |                       |                       |                                  |         |  |                   |    |   |          |                  |
|-------------------------------------------------|--------------------------|---------------|------------------|------------|-------------------------------------------------|-------------------|----------|-----------------------|-----------------------|----------------------------------|---------|--|-------------------|----|---|----------|------------------|
| ma<br>toi<br>d<br>Ar<br>thr<br>itis             | 03<br>87<br>3            |               | 6<br>9           |            |                                                 |                   |          | 2<br>4<br>8           | 9<br>6<br>2           | 1<br>5<br>3<br>6                 |         |  | 7<br>6            |    |   |          | 2<br>0           |
| Rh<br>eu<br>ma<br>toi<br>d<br>Ar<br>thr<br>itis | C<br>00<br>03<br>87<br>3 | CX<br>CL<br>8 | 3<br>5<br>7<br>6 | P1014<br>5 | C-X-C<br>motif<br>chemoki<br>ne<br>ligand 8     | Sig<br>nal<br>ing | 12<br>54 | 0<br>.<br>3<br>1      | 0<br>.<br>9<br>6<br>2 | 0.<br>0<br>0<br>2<br>7<br>4      | 0.<br>4 |  | 0.<br>9<br>6<br>8 | 93 | 0 | 19<br>90 | 2<br>0<br>2<br>0 |
| Rh<br>eu<br>ma<br>toi<br>d<br>Ar<br>thr<br>itis | C<br>00<br>03<br>87<br>3 | IL1<br>8      | 3<br>6<br>0<br>6 | Q141<br>16 | interleukin 18                                  |                   | 75<br>0  | 0<br>.<br>3<br>6<br>5 | 0<br>.<br>9<br>2<br>3 | 0.<br>0<br>3<br>0<br>7<br>1<br>7 | 0.<br>4 |  | 0.<br>9<br>1<br>7 | 48 | 4 | 19<br>99 | 2<br>0<br>1<br>9 |
| Rh<br>eu<br>ma<br>toi<br>d<br>Ar<br>thr<br>itis | C<br>00<br>03<br>87<br>3 | MI<br>F       | 4<br>2<br>8<br>2 | P1417<br>4 | macrophage<br>migration<br>inhibitory<br>factor |                   | 45<br>5  | 0<br>.<br>4<br>1<br>2 | 0<br>.<br>8<br>8<br>5 | 0.<br>0<br>1<br>2<br>6<br>2      | 0.<br>4 |  | 0.<br>8<br>9<br>5 | 19 | 2 | 19<br>99 | 2<br>0<br>2<br>0 |
| Rh<br>eu<br>ma<br>toi<br>d<br>Ar<br>thr<br>itis | C<br>00<br>03<br>87<br>3 | M<br>MP<br>2  | 4<br>3<br>1<br>3 | P0825<br>3 | matrix<br>metallop<br>eptidase<br>2             | En<br>zy<br>me    | 10<br>21 | 0<br>.<br>3<br>3<br>3 | 0<br>.<br>9<br>2<br>3 | 0.<br>8<br>3<br>8<br>7<br>8      | 0.<br>4 |  | 0.<br>9<br>2<br>3 | 26 | 1 | 19<br>98 | 2<br>0<br>1<br>9 |
| Rh<br>eu<br>ma<br>toi<br>d<br>Ar<br>thr<br>itis | C<br>00<br>03<br>87<br>3 | MP<br>O       | 4<br>3<br>5<br>3 | P0516<br>4 | myelope<br>roxidase                             | En<br>zy<br>me    | 65<br>3  | 0<br>.<br>3<br>7<br>7 | 0<br>.<br>9<br>2<br>3 | 7.<br>1<br>1<br>E<br>-<br>1<br>5 | 0.<br>4 |  | 1                 | 13 | 0 | 20<br>12 | 2<br>0<br>2<br>0 |
| Rh<br>eu<br>ma<br>toi<br>d<br>Ar<br>thr<br>itis | C<br>00<br>03<br>87<br>3 | MT<br>HF<br>R | 4<br>5<br>2<br>4 | P4289<br>8 | methylenetet<br>rahydrofolate<br>reductase      |                   | 98<br>5  | 0<br>.<br>3<br>3<br>7 | 0<br>.<br>8<br>8<br>5 | 3.<br>2<br>1<br>E<br>-<br>1<br>0 | 0.<br>4 |  | 0.<br>9<br>2<br>3 | 52 | 6 | 20<br>01 | 2<br>0<br>1<br>8 |

|                      |          |           |       |        |                                           |             |      |       |       |          |     |  |       |    |   |      |      |
|----------------------|----------|-----------|-------|--------|-------------------------------------------|-------------|------|-------|-------|----------|-----|--|-------|----|---|------|------|
| Rheumatoid Arthritis | C0003873 | NC F2     | 4688  | P19878 | neutrophil cytosolic factor 2             | Enzyme      | 90   | 0.601 | 0.692 | 4.01E-07 | 0.4 |  | 1     | 3  | 1 | 2003 | 2019 |
| Rheumatoid Arthritis | C0003873 | TNFRSF11B | 4982  | O00300 | TNF receptor superfamily member 11b       |             | 443  | 0.422 | 0.808 | 0.161    | 0.4 |  | 0.929 | 42 | 5 | 2001 | 2019 |
| Rheumatoid Arthritis | C0003873 | FOX P3    | 50943 | Q9BZS1 | forkhead box P3                           |             | 688  | 0.368 | 0.846 | 0.994    | 0.4 |  | 0.973 | 37 | 1 | 2005 | 2020 |
| Rheumatoid Arthritis | C0003873 | IL23A     | 51561 | Q9NPF7 | interleukin 23 subunit alpha              | Signaling   | 427  | 0.415 | 0.846 | 0.35806  | 0.4 |  | 1     | 36 | 0 | 1989 | 2020 |
| Rheumatoid Arthritis | C0003873 | ABC B1    | 5243  | P08183 | ATP binding cassette subfamily B member 1 | Transporter | 933  | 0.344 | 0.885 | 1.26E-05 | 0.4 |  | 0.95  | 20 | 1 | 1995 | 2020 |
| Rheumatoid Arthritis | C0003873 | PON1      | 5444  | P27169 | paraoxonase 1                             |             | 496  | 0.409 | 0.885 | 9.81E-11 | 0.4 |  | 0.917 | 12 | 2 | 2003 | 2019 |
| Rheumatoid Ar        | C0003873 | PTGS2     | 5743  | P35354 | prostaglandin-endoperoxide synthase 2     | Enzyme      | 1234 | 0.314 | 0.962 | 0.99597  | 0.4 |  | 0.952 | 42 | 0 | 1994 | 2019 |

|                                                 |                          |                     |                  |            |                                                                        |                                                              |          |                       |                       |                                  |         |  |                   |    |   |          |                  |
|-------------------------------------------------|--------------------------|---------------------|------------------|------------|------------------------------------------------------------------------|--------------------------------------------------------------|----------|-----------------------|-----------------------|----------------------------------|---------|--|-------------------|----|---|----------|------------------|
| thr<br>itis                                     |                          |                     |                  |            |                                                                        |                                                              |          |                       |                       |                                  |         |  |                   |    |   |          |                  |
| Rh<br>eu<br>ma<br>toi<br>d<br>Ar<br>thr<br>itis | C<br>00<br>03<br>87<br>3 | CC<br>L21           | 6<br>3<br>6<br>6 | O005<br>85 | C-C<br>motif<br>chemoki<br>ne<br>ligand<br>21                          | Sig<br>nal<br>ing                                            | 18<br>6  | 0<br>.<br>5<br>0<br>2 | 0<br>.<br>7<br>6<br>9 | 0.<br>0<br>3<br>6<br>2<br>3<br>9 | 0.<br>4 |  | 0.<br>8<br>5<br>7 | 14 | 2 | 20<br>03 | 2<br>0<br>1<br>9 |
| Rh<br>eu<br>ma<br>toi<br>d<br>Ar<br>thr<br>itis | C<br>00<br>03<br>87<br>3 | SL<br>C1<br>1A<br>1 | 6<br>5<br>5<br>6 | P4927<br>9 | solute<br>carrier<br>family<br>11<br>member<br>1                       | Tr<br>ans<br>por<br>ter                                      | 14<br>1  | 0<br>.<br>5<br>2<br>5 | 0<br>.<br>8<br>4<br>6 | 1.<br>5<br>5<br>E<br>-<br>1<br>9 | 0.<br>4 |  | 0.<br>9<br>3<br>8 | 16 | 6 | 19<br>96 | 2<br>0<br>1<br>9 |
| Rh<br>eu<br>ma<br>toi<br>d<br>Ar<br>thr<br>itis | C<br>00<br>03<br>87<br>3 | ST<br>AT<br>1       | 6<br>7<br>7<br>2 | P4222<br>4 | signal<br>transduc<br>er and<br>activator<br>of<br>transcrip<br>tion 1 | Nu<br>cle<br>ic<br>aci<br>d<br>bin<br>din<br>g               | 53<br>1  | 0<br>.<br>3<br>9<br>9 | 0<br>.<br>8<br>8<br>5 | 0.<br>9<br>9<br>9<br>9           | 0.<br>4 |  | 0.<br>8<br>6<br>7 | 15 | 0 | 20<br>03 | 2<br>0<br>1<br>9 |
| Rh<br>eu<br>ma<br>toi<br>d<br>Ar<br>thr<br>itis | C<br>00<br>03<br>87<br>3 | TL<br>R2            | 7<br>0<br>9<br>7 | O606<br>03 | toll<br>receptor 2                                                     | like                                                         | 74<br>9  | 0<br>.<br>3<br>6<br>1 | 0<br>.<br>9<br>2<br>3 | 1.<br>0<br>2<br>E<br>-<br>0<br>6 | 0.<br>4 |  | 0.<br>9<br>6<br>6 | 29 | 2 | 20<br>03 | 2<br>0<br>1<br>9 |
| Rh<br>eu<br>ma<br>toi<br>d<br>Ar<br>thr<br>itis | C<br>00<br>03<br>87<br>3 | VE<br>GF<br>A       | 7<br>4<br>2<br>2 | P1569<br>2 | vascular<br>endothel<br>ial<br>growth<br>factor A                      | Sig<br>nal<br>ing                                            | 18<br>99 | 0<br>.<br>2<br>6<br>6 | 0<br>.<br>9<br>2<br>3 | 2.<br>4<br>1<br>E<br>-<br>0<br>5 | 0.<br>4 |  | 0.<br>9<br>8<br>7 | 75 | 7 | 19<br>94 | 2<br>0<br>2<br>0 |
| Rh<br>eu<br>ma<br>toi<br>d<br>Ar<br>thr<br>itis | C<br>00<br>03<br>87<br>3 | CX<br>CR<br>4       | 7<br>8<br>5<br>2 | P6107<br>3 | C-X-C<br>motif<br>chemoki<br>ne<br>receptor<br>4                       | G-<br>pro<br>tei<br>n<br>co<br>upl<br>ed<br>rec<br>ept<br>or | 73<br>9  | 0<br>.<br>3<br>6<br>2 | 0<br>.<br>9<br>2<br>3 | 0.<br>0<br>1<br>7<br>8<br>0<br>4 | 0.<br>4 |  | 0.<br>9<br>4<br>4 | 18 | 0 | 20<br>00 | 2<br>0<br>1<br>9 |

|                      |          |          |        |        |                                                 |                  |     |       |       |          |      |  |       |    |   |      |      |
|----------------------|----------|----------|--------|--------|-------------------------------------------------|------------------|-----|-------|-------|----------|------|--|-------|----|---|------|------|
| Rheumatoid Arthritis | C0003873 | CAT      | 847    | P04040 | catalase                                        | Enzyme           | 794 | 0.359 | 0.362 | 1.63E-10 | 0.4  |  | 0.917 | 12 | 0 | 2006 | 2019 |
| Rheumatoid Arthritis | C0003873 | ADIPOQ   | 9370   | Q15848 | adiponectin, C1Q and collagen domain containing |                  | 679 | 0.376 | 0.385 | 4.64E-09 | 0.4  |  | 0.957 | 23 | 4 | 2003 | 2020 |
| Rheumatoid Arthritis | C0003873 | CCN2     | 1490   | P29279 | cellular communication network factor 2         | Signaling        | 518 | 0.399 | 0.386 | 0.00502  | 0.39 |  | 1     | 10 | 0 | 2006 | 2020 |
| Rheumatoid Arthritis | C0003873 | TNFSF14  | 8740   | O43557 | TNF superfamily member 14                       | Signaling        | 143 | 0.529 | 0.379 | 0.005663 | 0.39 |  | 1     | 10 | 0 | 2003 | 2017 |
| Rheumatoid Arthritis | C0003873 | DHFR     | 1719   | P00374 | dihydrofolate reductase                         | Enzyme           | 191 | 0.513 | 0.383 | 0.00433  | 0.38 |  | 0.889 | 9  | 0 | 2003 | 2019 |
| Rheumatoid Arthritis | C0003873 | TNFRSF14 | 8764   | Q92956 | TNF receptor superfamily member 14              |                  | 100 | 0.568 | 0.371 | 0.00752  | 0.38 |  | 0.889 | 9  | 0 | 2003 | 2017 |
| Rheumatoid Ar        | C0003873 | TGAP     | 117289 | Q8N103 | T cell activation RhoGTPase                     | Enzyme modulator | 24  | 0.7   | 0.462 | 0.008621 | 0.37 |  | 1     | 9  | 2 | 2010 | 2018 |

|                                                 |                          |                |                            |            |                                                             |                         |         |                       |                                      |                                  |          |  |                   |   |   |          |                  |
|-------------------------------------------------|--------------------------|----------------|----------------------------|------------|-------------------------------------------------------------|-------------------------|---------|-----------------------|--------------------------------------|----------------------------------|----------|--|-------------------|---|---|----------|------------------|
| thr<br>itis                                     |                          |                |                            |            | activatin<br>g protein                                      | ato<br>r                |         |                       |                                      |                                  |          |  |                   |   |   |          |                  |
| Rh<br>eu<br>ma<br>toi<br>d<br>Ar<br>thr<br>itis | C<br>00<br>03<br>87<br>3 | IR<br>AK<br>1  | 3<br>6<br>5<br>4           | P5161<br>7 | interleuk<br>in 1<br>receptor<br>associat<br>ed<br>kinase 1 | Ki<br>nas<br>e          | 20<br>0 | 0<br>.<br>5<br>0<br>6 | 0<br>.<br>8<br>0<br>8                | 0.<br>9<br>8<br>7<br>4           | 0.<br>36 |  | 0.<br>8<br>5<br>7 | 7 | 3 | 20<br>08 | 2<br>0<br>1<br>8 |
| Rh<br>eu<br>ma<br>toi<br>d<br>Ar<br>thr<br>itis | C<br>00<br>03<br>87<br>3 | CO<br>L2<br>A1 | 1<br>2<br>8<br>0           | P0245<br>8 | collagen type<br>II alpha 1<br>chain                        |                         | 49<br>6 | 0<br>.<br>4<br>4<br>4 | 0<br>.<br>8<br>4<br>6                | 1                                | 0.<br>35 |  | 0.<br>8<br>5<br>7 | 7 | 0 | 19<br>93 | 2<br>0<br>1<br>8 |
| Rh<br>eu<br>ma<br>toi<br>d<br>Ar<br>thr<br>itis | C<br>00<br>03<br>87<br>3 | AL<br>OX<br>5  | 2<br>4<br>0                | P0991<br>7 | arachido<br>nate 5-<br>lipoxyge<br>nase                     | En<br>zy<br>me          | 34<br>2 | 0<br>.<br>4<br>4<br>7 | 0<br>.<br>8<br>8<br>5                | 1.<br>2<br>1<br>E<br>-<br>0<br>6 | 0.<br>35 |  | 1                 | 6 | 0 | 19<br>95 | 2<br>0<br>1<br>7 |
| Rh<br>eu<br>ma<br>toi<br>d<br>Ar<br>thr<br>itis | C<br>00<br>03<br>87<br>3 | GC             | 2<br>6<br>3<br>8           | P0277<br>4 | GC<br>vitamin<br>D<br>binding<br>protein                    | Tr<br>ans<br>por<br>ter | 21<br>9 | 0<br>.<br>4<br>8<br>9 | 0<br>.<br>8<br>8<br>5                | 2.<br>7<br>3<br>E<br>-<br>1<br>1 | 0.<br>35 |  | 0.<br>8           | 5 | 1 | 19<br>85 | 2<br>0<br>1<br>9 |
| Rh<br>eu<br>ma<br>toi<br>d<br>Ar<br>thr<br>itis | C<br>00<br>03<br>87<br>3 | HO<br>XD<br>13 | 3<br>2<br>3<br>9           | P3545<br>3 | homeobox<br>D13                                             |                         | 25<br>9 | 0<br>.<br>4<br>8<br>3 | 0<br>.<br>8<br>0<br>8<br>6<br>0<br>6 | 0.<br>0<br>0<br>8<br>6<br>0<br>6 | 0.<br>35 |  | 1                 | 6 | 0 | 19<br>97 | 2<br>0<br>1<br>9 |
| Rh<br>eu<br>ma<br>toi<br>d<br>Ar<br>thr<br>itis | C<br>00<br>03<br>87<br>3 | NC<br>F1       | 6<br>5<br>3<br>3<br>6<br>1 | P1459<br>8 | neutrophil<br>cytosolic<br>factor 1                         |                         | 17<br>0 | 0<br>.<br>5<br>2<br>1 | 0<br>.<br>8<br>0<br>8                | 2.<br>8<br>3<br>E<br>-<br>0<br>5 | 0.<br>35 |  | 1                 | 7 | 1 | 20<br>03 | 2<br>0<br>1<br>8 |
| Rh<br>eu<br>ma<br>toi                           | C<br>00<br>03            | TX<br>ND<br>C5 | 8<br>1<br>5                | Q8NB<br>S9 | thioredoxin<br>domain<br>containing 5                       |                         | 65      | 0<br>.<br>6           | 0<br>.<br>5                          | 4.<br>8<br>7<br>E                | 0.<br>35 |  | 1                 | 6 | 2 | 20<br>11 | 2<br>0<br>1<br>8 |

|                                                 |                          |                |                  |            |                                                                                                                                 |                                         |         |                       |                       |                                  |          |  |              |   |   |          |                  |
|-------------------------------------------------|--------------------------|----------------|------------------|------------|---------------------------------------------------------------------------------------------------------------------------------|-----------------------------------------|---------|-----------------------|-----------------------|----------------------------------|----------|--|--------------|---|---|----------|------------------|
| d<br>Ar<br>thr<br>itis                          | 87<br>3                  |                | 6<br>7           |            |                                                                                                                                 |                                         |         | 1<br>5                | 7<br>7                | -<br>1<br>3                      |          |  |              |   |   |          |                  |
| Rh<br>eu<br>ma<br>toi<br>d<br>Ar<br>thr<br>itis | C<br>00<br>03<br>87<br>3 | GR<br>K2       | 1<br>5<br>6      | P2509<br>8 | G<br>protein-<br>coupled<br>receptor<br>kinase 2                                                                                | Ki<br>nas<br>e                          | 15<br>9 | 0<br>.<br>5<br>3<br>2 | 0<br>.<br>6<br>5<br>4 | 0.<br>9<br>9<br>9<br>8           | 0.<br>34 |  | 1            | 4 | 0 | 19<br>99 | 2<br>0<br>1<br>9 |
| Rh<br>eu<br>ma<br>toi<br>d<br>Ar<br>thr<br>itis | C<br>00<br>03<br>87<br>3 | FP<br>GS       | 2<br>3<br>5<br>6 | Q059<br>32 | folylpol<br>yglutam<br>ate<br>synthase                                                                                          | En<br>zy<br>me                          | 40      | 0<br>.<br>6<br>4<br>4 | 0<br>.<br>4<br>2<br>3 | 1.<br>1<br>6<br>E<br>-<br>0<br>6 | 0.<br>34 |  | 1            | 5 | 3 | 20<br>07 | 2<br>0<br>2<br>0 |
| Rh<br>eu<br>ma<br>toi<br>d<br>Ar<br>thr<br>itis | C<br>00<br>03<br>87<br>3 | IGF<br>BP<br>3 | 3<br>4<br>8<br>6 | P1793<br>6 | insulin<br>like<br>growth<br>factor<br>binding<br>protein 3                                                                     | En<br>zy<br>me<br>mo<br>dul<br>ato<br>r | 35<br>0 | 0<br>.<br>4<br>3<br>9 | 0<br>.<br>8<br>0<br>8 | 0.<br>9<br>1<br>0<br>2<br>9      | 0.<br>34 |  | 0.<br>7<br>5 | 4 | 0 | 20<br>07 | 2<br>0<br>1<br>9 |
| Rh<br>eu<br>ma<br>toi<br>d<br>Ar<br>thr<br>itis | C<br>00<br>03<br>87<br>3 | FA<br>SL<br>G  | 3<br>5<br>6      | P4802<br>3 | Fas<br>ligand                                                                                                                   | Sig<br>nal<br>ing                       | 39<br>8 | 0<br>.<br>4<br>3      | 0<br>.<br>8<br>8<br>5 | 0.<br>1<br>8<br>3<br>4<br>5      | 0.<br>34 |  | 1            | 5 | 2 | 20<br>08 | 2<br>0<br>1<br>5 |
| Rh<br>eu<br>ma<br>toi<br>d<br>Ar<br>thr<br>itis | C<br>00<br>03<br>87<br>3 | AT<br>IC       | 4<br>7<br>1      | P3193<br>9 | 5-<br>aminoim<br>idazole-<br>4-<br>carboxa<br>mide<br>ribonucl<br>eotide<br>formyltr<br>ansferas<br>e/IMP<br>cyclohy<br>drolase | En<br>zy<br>me                          | 10<br>0 | 0<br>.<br>5<br>7<br>6 | 0<br>.<br>7<br>3<br>1 | 3.<br>0<br>1<br>E<br>-<br>1<br>9 | 0.<br>34 |  | 1            | 5 | 1 | 20<br>04 | 2<br>0<br>1<br>6 |
| Rh<br>eu<br>ma<br>toi<br>d                      | C<br>00<br>03<br>87<br>3 | PR<br>KC<br>Q  | 5<br>5<br>8<br>8 | Q047<br>59 | protein<br>kinase C<br>theta                                                                                                    | Ki<br>nas<br>e                          | 53      | 0<br>.<br>6<br>3<br>6 | 0<br>.<br>6<br>5<br>4 | 0.<br>2<br>9<br>7<br>2           | 0.<br>34 |  | 1            | 7 | 0 | 20<br>08 | 2<br>0<br>1<br>9 |

|                                                 |                          |                |                       |            |                                                                                              |                   |         |                       |                                 |                                  |          |  |                   |   |   |          |                  |
|-------------------------------------------------|--------------------------|----------------|-----------------------|------------|----------------------------------------------------------------------------------------------|-------------------|---------|-----------------------|---------------------------------|----------------------------------|----------|--|-------------------|---|---|----------|------------------|
| Ar<br>thr<br>itis                               |                          |                |                       |            |                                                                                              |                   |         |                       |                                 |                                  |          |  |                   |   |   |          |                  |
| Rh<br>eu<br>ma<br>toi<br>d<br>Ar<br>thr<br>itis | C<br>00<br>03<br>87<br>3 | PT<br>GS<br>1  | 5<br>7<br>4<br>2      | P2321<br>9 | prostagl<br>andin-<br>endoper<br>oxide<br>synthase<br>1                                      | En<br>zy<br>me    | 31<br>8 | 0<br>.<br>4<br>6      | 0<br>.<br>8<br>5                | 6.<br>2<br>4<br>E<br>-<br>0<br>7 | 0.<br>34 |  | 1                 | 4 | 0 | 19<br>94 | 2<br>0<br>0<br>4 |
| Rh<br>eu<br>ma<br>toi<br>d<br>Ar<br>thr<br>itis | C<br>00<br>03<br>87<br>3 | CC<br>L8       | 6<br>3<br>5<br>5      | P8007<br>5 | C-C<br>motif<br>chemoki<br>ne<br>ligand 8                                                    | Sig<br>nal<br>ing | 11<br>5 | 0<br>.<br>5<br>4<br>6 | 0<br>.<br>6<br>9<br>2           | 0.<br>0<br>4<br>1<br>4<br>1<br>2 | 0.<br>34 |  | 1                 | 5 | 0 | 20<br>07 | 2<br>0<br>1<br>9 |
| Rh<br>eu<br>ma<br>toi<br>d<br>Ar<br>thr<br>itis | C<br>00<br>03<br>87<br>3 | SO<br>D2       | 6<br>6<br>4<br>8      | P0417<br>9 | superoxi<br>de<br>dismutas<br>e 2                                                            | En<br>zy<br>me    | 66<br>8 | 0<br>.<br>3<br>7<br>9 | 0<br>.<br>9<br>2<br>3           | 0.<br>1<br>5<br>4<br>9<br>9      | 0.<br>34 |  | 0.<br>7<br>1<br>4 | 7 | 1 | 20<br>00 | 2<br>0<br>1<br>9 |
| Rh<br>eu<br>ma<br>toi<br>d<br>Ar<br>thr<br>itis | C<br>00<br>03<br>87<br>3 | GG<br>H        | 8<br>8<br>3<br>6      | Q928<br>20 | gamma-<br>glutamyl<br>hydrolas<br>e                                                          | En<br>zy<br>me    | 66      | 0<br>.<br>6<br>0<br>8 | 0<br>.<br>5<br>8<br>1<br>3<br>2 | 0.<br>5<br>8<br>1<br>3<br>2      | 0.<br>34 |  | 1                 | 5 | 3 | 20<br>04 | 2<br>0<br>2<br>0 |
| Rh<br>eu<br>ma<br>toi<br>d<br>Ar<br>thr<br>itis | C<br>00<br>03<br>87<br>3 | B3<br>GN<br>T2 | 1<br>0<br>6<br>7<br>8 | Q9N<br>Y97 | UDP-<br>GlcNAc<br>:betaGal<br>beta-1,3-<br>N-<br>acetylgl<br>ucosami<br>nyltransf<br>erase 2 | En<br>zy<br>me    | 20      | 0<br>.<br>7<br>0<br>5 | 0<br>.<br>5<br>8<br>7<br>2<br>2 | 0.<br>8<br>8<br>7<br>2<br>2      | 0.<br>33 |  | 1                 | 3 | 0 | 19<br>88 | 2<br>0<br>1<br>3 |
| Rh<br>eu<br>ma<br>toi<br>d<br>Ar<br>thr<br>itis | C<br>00<br>03<br>87<br>3 | CP             | 1<br>3<br>5<br>6      | P0045<br>0 | cerulopl<br>asmin                                                                            | En<br>zy<br>me    | 28<br>3 | 0<br>.<br>4<br>6<br>6 | 0<br>.<br>8<br>4<br>6           | 4.<br>2<br>E<br>-<br>1<br>0      | 0.<br>33 |  | 1                 | 4 | 0 | 20<br>02 | 2<br>0<br>1<br>8 |
| Rh<br>eu                                        | C<br>00                  | PL<br>B1       | 1<br>5                | Q6P1<br>J6 | phospholipase<br>B1                                                                          |                   | 21<br>9 | 0<br>.<br>.           | 0<br>.<br>.                     | 1.<br>7                          | 0.<br>33 |  | 1                 | 3 | 0 | 20<br>04 | 2<br>0           |



|                      |          |         |       |        |                                         |                            |     |       |        |         |       |   |       |   |   |      |      |
|----------------------|----------|---------|-------|--------|-----------------------------------------|----------------------------|-----|-------|--------|---------|-------|---|-------|---|---|------|------|
| matoid Arthritis     | 03873    |         | 1056  |        |                                         |                            |     | 488   | 846    | 3E-72   |       |   |       |   |   | 14   |      |
| Rheumatoid Arthritis | C0003873 | MP12    | 4321  | P39900 | matrix metalloproteinase 12             | Enzyme                     | 216 | 0.484 | 0.885  |         | 0.33  |   | 1     | 4 | 1 | 2003 | 2009 |
| Rheumatoid Arthritis | C0003873 | ACKR3   | 57007 | P25106 | atypical chemokine receptor 3           | G-protein coupled receptor | 400 | 0.428 | 0.8534 | 0.333   |       | 1 | 4     | 0 |   | 1999 | 2010 |
| Rheumatoid Arthritis | C0003873 | PRDM1   | 639   | O75626 | PR/SET domain 1                         |                            | 126 | 0.538 | 0.731  | 0.9565  | 0.333 |   | 0.833 | 6 | 0 | 2009 | 2019 |
| Rheumatoid Arthritis | C0003873 | CD83    | 9308  | Q01151 | CD83 molecule                           |                            | 96  | 0.566 | 0.731  | 0.05214 | 0.333 |   | 0.75  | 4 | 0 | 2003 | 2017 |
| Rheumatoid Arthritis | C0003873 | ADORA2A | 135   | P29274 | adenosine A2a receptor                  | G-protein coupled receptor | 213 | 0.526 | 0.791  | 0.5971  | 0.32  |   | 1     | 3 | 1 | 2009 | 2019 |
| Rheumatoid           | C0003    | CEC12A  | 1603  | Q5QGZ9 | C-type lectin domain family 12 member A |                            | 34  | 0.6   | 0.3    | 2.6E-   | 0.32  |   | 0.667 | 3 | 0 | 2007 | 2016 |

|                                                 |                          |                     |                       |            |                                                                                                     |                                                |         |                       |                            |                                  |          |  |   |   |   |          |                  |
|-------------------------------------------------|--------------------------|---------------------|-----------------------|------------|-----------------------------------------------------------------------------------------------------|------------------------------------------------|---------|-----------------------|----------------------------|----------------------------------|----------|--|---|---|---|----------|------------------|
| d<br>Ar<br>thr<br>itis                          | 87<br>3                  |                     | 6<br>4                |            |                                                                                                     |                                                |         | 8<br>6                | 4<br>6                     | 0<br>7                           |          |  |   |   |   |          |                  |
| Rh<br>eu<br>ma<br>toi<br>d<br>Ar<br>thr<br>itis | C<br>00<br>03<br>87<br>3 | IK<br>ZF<br>3       | 2<br>2<br>8<br>0<br>6 | Q9U<br>KT9 | IKARO<br>S family<br>zinc<br>finger 3                                                               | Tr<br>ans<br>cri<br>pti<br>on<br>fac<br>tor    | 64      | 0<br>.<br>6<br>0<br>8 | 0<br>.<br>6<br>9<br>2      | 0.<br>9<br>8<br>4<br>1<br>6      | 0.<br>32 |  | 1 | 3 | 0 | 20<br>12 | 2<br>0<br>1<br>6 |
| Rh<br>eu<br>ma<br>toi<br>d<br>Ar<br>thr<br>itis | C<br>00<br>03<br>87<br>3 | FK<br>BP<br>5       | 2<br>2<br>8<br>9      | Q134<br>51 | FKBP<br>prolyl<br>isomeras<br>e 5                                                                   | En<br>zy<br>me                                 | 17<br>9 | 0<br>.<br>5<br>2<br>4 | 0<br>.<br>7<br>6<br>9      | 0.<br>7<br>3<br>3<br>9<br>3      | 0.<br>32 |  | 1 | 3 | 0 | 20<br>03 | 2<br>0<br>1<br>7 |
| Rh<br>eu<br>ma<br>toi<br>d<br>Ar<br>thr<br>itis | C<br>00<br>03<br>87<br>3 | CX<br>CL<br>2       | 2<br>9<br>2<br>0      | P1987<br>5 | C-X-C<br>motif<br>chemoki<br>ne<br>ligand 2                                                         | Sig<br>nal<br>ing                              | 18<br>6 | 0<br>.<br>5<br>1<br>3 | 0<br>.<br>8<br>8<br>5      | 3.<br>6<br>1<br>E<br>-<br>0<br>7 | 0.<br>32 |  | 1 | 3 | 0 | 20<br>04 | 2<br>0<br>1<br>7 |
| Rh<br>eu<br>ma<br>toi<br>d<br>Ar<br>thr<br>itis | C<br>00<br>03<br>87<br>3 | HS<br>D1<br>1B<br>1 | 3<br>2<br>9<br>0      | P2884<br>5 | hydroxysteroi<br>d 11-beta<br>dehydrogenas<br>e 1                                                   |                                                | 16<br>3 | 0<br>.<br>5<br>2      | 0<br>.<br>7<br>3<br>1      | 0.<br>4<br>1<br>6<br>9<br>6      | 0.<br>32 |  | 1 | 3 | 0 | 20<br>09 | 2<br>0<br>1<br>8 |
| Rh<br>eu<br>ma<br>toi<br>d<br>Ar<br>thr<br>itis | C<br>00<br>03<br>87<br>3 | RB<br>PJ            | 3<br>5<br>1<br>6      | Q063<br>30 | recombi<br>nation<br>signal<br>binding<br>protein<br>for<br>immuno<br>globulin<br>kappa J<br>region | Nu<br>cle<br>ic<br>aci<br>d<br>bin<br>din<br>g | 16<br>1 | 0<br>.<br>5<br>1<br>8 | 0<br>.<br>8<br>0<br>8<br>3 | 0.<br>9<br>8<br>5<br>3           | 0.<br>32 |  | 1 | 4 | 0 | 20<br>10 | 2<br>0<br>1<br>6 |
| Rh<br>eu<br>ma<br>toi<br>d<br>Ar<br>thr<br>itis | C<br>00<br>03<br>87<br>3 | ST<br>S             | 4<br>1<br>2           | P0884<br>2 | steroid<br>sulfatase                                                                                | En<br>zy<br>me                                 | 38<br>2 | 0<br>.<br>4<br>3<br>1 | 0<br>.<br>8<br>4<br>6      | 0.<br>8<br>0<br>8<br>8<br>6      | 0.<br>32 |  | 1 | 3 | 0 | 20<br>05 | 2<br>0<br>1<br>9 |

|                      |          |       |       |        |                                           |             |     |       |         |          |      |  |   |   |   |      |      |
|----------------------|----------|-------|-------|--------|-------------------------------------------|-------------|-----|-------|---------|----------|------|--|---|---|---|------|------|
| Rheumatoid Arthritis | C0003873 | MP10  | 4319  | P09238 | matrix metalloproteinase 10               | Enzyme      | 123 | 0.553 | 0.808   | 5.91E-15 | 0.32 |  | 1 | 3 | 0 | 1989 | 2009 |
| Rheumatoid Arthritis | C0003873 | BGN   | 633   | P21810 | biglycan                                  |             | 253 | 0.484 | 0.8029  | 0.4529   | 0.32 |  | 1 | 3 | 0 | 2004 | 2018 |
| Rheumatoid Arthritis | C0003873 | BM P4 | 652   | P12644 | bone morphogenetic protein 4              | Signaling   | 423 | 0.422 | 0.8084  | 0.9564   | 0.32 |  | 1 | 3 | 0 | 2006 | 2019 |
| Rheumatoid Arthritis | C0003873 | SM S  | 6611  | P52788 | spermine synthase                         |             | 263 | 0.491 | 0.846   | 0.97297  | 0.32 |  | 1 | 3 | 0 | 1998 | 2017 |
| Rheumatoid Arthritis | C0003873 | ABCC5 | 10057 | O15440 | ATP binding cassette subfamily C member 5 | Transporter | 71  | 0.606 | 0.64152 | 0.004152 | 0.31 |  | 1 | 1 | 0 | 2013 | 2013 |
| Rheumatoid Arthritis | C0003873 | ABCC4 | 10257 | O15439 | ATP binding cassette subfamily C member 4 | Transporter | 146 | 0.536 | 0.769   | 1.07E-07 | 0.31 |  | 1 | 2 | 1 | 2013 | 2017 |
| Rheumatoid Ar        | C0003873 | CTSD  | 1509  | P07339 | cathepsin D                               | Enzyme      | 242 | 0.478 | 0.846   | 0.0009   | 0.31 |  | 1 | 2 | 0 | 1995 | 2003 |

|                                                 |                          |                |                       |            |                                                                          |                                       |         |                       |                       |                                  |          |  |   |   |   |                         |
|-------------------------------------------------|--------------------------|----------------|-----------------------|------------|--------------------------------------------------------------------------|---------------------------------------|---------|-----------------------|-----------------------|----------------------------------|----------|--|---|---|---|-------------------------|
| thr<br>itis                                     |                          |                |                       |            |                                                                          |                                       |         |                       | 1<br>7                |                                  |          |  |   |   |   |                         |
| Rh<br>eu<br>ma<br>toi<br>d<br>Ar<br>thr<br>itis | C<br>00<br>03<br>87<br>3 | DD<br>X6       | 1<br>6<br>5<br>6      | P2619<br>6 | DEAD-box<br>helicase 6                                                   |                                       | 52      | 0<br>.<br>6<br>6<br>3 | 0<br>.<br>3<br>8<br>5 | 0.<br>9<br>9<br>9<br>6<br>4      | 0.<br>31 |  | 1 | 2 | 0 | 20<br>12<br>0<br>1<br>7 |
| Rh<br>eu<br>ma<br>toi<br>d<br>Ar<br>thr<br>itis | C<br>00<br>03<br>87<br>3 | GR<br>K6       | 2<br>8<br>7<br>0      | P4325<br>0 | G<br>protein-<br>coupled<br>receptor<br>kinase 6                         | Ki<br>nas<br>e                        | 51      | 0<br>.<br>6<br>7      | 0<br>.<br>6<br>5<br>4 | 0.<br>0<br>0<br>0<br>4<br>8<br>7 | 0.<br>31 |  | 1 | 1 | 0 | 19<br>99<br>9<br>9<br>9 |
| Rh<br>eu<br>ma<br>toi<br>d<br>Ar<br>thr<br>itis | C<br>00<br>03<br>87<br>3 | HC<br>LS<br>1  | 3<br>0<br>5<br>9      | P1431<br>7 | hematop<br>oietic<br>cell-<br>specific<br>Lyn<br>substrate<br>1          | Ce<br>llul<br>ar<br>str<br>uct<br>ure | 13<br>2 | 0<br>.<br>5<br>3<br>9 | 0<br>.<br>8<br>4<br>6 | 1.<br>3<br>2<br>E<br>-<br>0<br>6 | 0.<br>31 |  | 1 | 2 | 0 | 19<br>92<br>0<br>0<br>3 |
| Rh<br>eu<br>ma<br>toi<br>d<br>Ar<br>thr<br>itis | C<br>00<br>03<br>87<br>3 | HO<br>XD<br>10 | 3<br>2<br>3<br>6      | P2835<br>8 | homeobox<br>D10                                                          |                                       | 83      | 0<br>.<br>5<br>9      | 0<br>.<br>5<br>3<br>8 | 0.<br>0<br>6<br>2<br>9<br>1<br>8 | 0.<br>31 |  | 1 | 2 | 0 | 20<br>07<br>0<br>1<br>8 |
| Rh<br>eu<br>ma<br>toi<br>d<br>Ar<br>thr<br>itis | C<br>00<br>03<br>87<br>3 | PX<br>K        | 5<br>4<br>8<br>9<br>9 | Q7Z7<br>A4 | PX<br>domain<br>containi<br>ng<br>serine/th<br>reonine<br>kinase<br>like | Ki<br>nas<br>e                        | 13      | 0<br>.<br>8<br>2<br>1 | 0<br>.<br>2<br>3<br>1 | 0.<br>0<br>1<br>0<br>8<br>4<br>7 | 0.<br>31 |  | 1 | 2 | 0 | 20<br>10<br>0<br>1<br>7 |
| Rh<br>eu<br>ma<br>toi<br>d<br>Ar<br>thr<br>itis | C<br>00<br>03<br>87<br>3 | BC<br>L2<br>A1 | 5<br>9<br>7           | Q165<br>48 | BCL2<br>related<br>protein<br>A1                                         | Sig<br>nal<br>ing                     | 15<br>0 | 0<br>.<br>5<br>2<br>9 | 0<br>.<br>7<br>3<br>1 | 0.<br>2<br>0<br>7<br>8<br>5      | 0.<br>31 |  | 1 | 2 | 0 | 20<br>09<br>0<br>1<br>7 |
| Rh<br>eu<br>ma<br>toi                           | C<br>00<br>03            | BM<br>P6       | 6<br>5<br>4           | P2200<br>4 | bone<br>morpho<br>genetic<br>protein 6                                   | Sig<br>nal<br>ing                     | 13<br>7 | 0<br>.<br>5           | 0<br>.<br>8           | 0.<br>7<br>5<br>9                | 0.<br>31 |  | 1 | 2 | 0 | 20<br>03<br>0<br>1<br>0 |

|                                                 |                          |                |                  |            |                                                                           |                                                              |         |                       |                       |                                  |          |  |   |   |   |          |                  |
|-------------------------------------------------|--------------------------|----------------|------------------|------------|---------------------------------------------------------------------------|--------------------------------------------------------------|---------|-----------------------|-----------------------|----------------------------------|----------|--|---|---|---|----------|------------------|
| d<br>Ar<br>thr<br>itis                          | 87<br>3                  |                |                  |            |                                                                           |                                                              |         | 3<br>1                | 0<br>8                | 4<br>7                           |          |  |   |   |   |          |                  |
| Rh<br>eu<br>ma<br>toi<br>d<br>Ar<br>thr<br>itis | C<br>00<br>03<br>87<br>3 | NR<br>4A<br>3  | 8<br>0<br>1<br>3 | Q925<br>70 | nuclear<br>receptor<br>subfamil<br>y 4<br>group A<br>member<br>3          | Nu<br>cle<br>ar<br>rec<br>ept<br>or                          | 18<br>6 | 0<br>.<br>5<br>0<br>2 | 0<br>.<br>8<br>0<br>8 | 0.<br>9<br>1<br>2<br>6           | 0.<br>31 |  | 1 | 2 | 0 | 20<br>02 | 2<br>0<br>0<br>9 |
| Rh<br>eu<br>ma<br>toi<br>d<br>Ar<br>thr<br>itis | C<br>00<br>03<br>87<br>3 | GD<br>F5       | 8<br>2<br>0<br>0 | P4302<br>6 | growth<br>different<br>iation<br>factor 5                                 | Sig<br>nal<br>ing                                            | 23<br>8 | 0<br>.<br>5<br>1<br>1 | 0<br>.<br>6<br>9<br>2 | 0.<br>6<br>7<br>0<br>0<br>2      | 0.<br>31 |  | 1 | 2 | 0 | 20<br>08 | 2<br>0<br>0<br>8 |
| Rh<br>eu<br>ma<br>toi<br>d<br>Ar<br>thr<br>itis | C<br>00<br>03<br>87<br>3 | CA<br>V2       | 8<br>5<br>8      | P5163<br>6 | caveolin<br>2                                                             | En<br>zy<br>me<br>mo<br>dul<br>ato<br>r                      | 96      | 0<br>.<br>5<br>7<br>5 | 0<br>.<br>6<br>9<br>2 | 0.<br>0<br>2<br>6<br>9<br>7<br>3 | 0.<br>31 |  | 1 | 1 | 0 | 20<br>07 | 2<br>0<br>0<br>7 |
| Rh<br>eu<br>ma<br>toi<br>d<br>Ar<br>thr<br>itis | C<br>00<br>03<br>87<br>3 | AB<br>CC<br>3  | 8<br>7<br>1<br>4 | O154<br>38 | ATP<br>binding<br>cassette<br>subfamil<br>y C<br>member<br>3              | Tr<br>ans<br>por<br>ter                                      | 16<br>0 | 0<br>.<br>5<br>1<br>7 | 0<br>.<br>7<br>6<br>9 | 1.<br>2<br>1<br>E<br>-<br>2<br>6 | 0.<br>31 |  | 1 | 2 | 0 | 20<br>12 | 2<br>0<br>1<br>3 |
| Rh<br>eu<br>ma<br>toi<br>d<br>Ar<br>thr<br>itis | C<br>00<br>03<br>87<br>3 | GP<br>RC<br>5A | 9<br>0<br>5<br>2 | Q8NF<br>J5 | G<br>protein-<br>coupled<br>receptor<br>class C<br>group 5<br>member<br>A | G-<br>pro<br>tei<br>n<br>co<br>upl<br>ed<br>rec<br>ept<br>or | 90      | 0<br>.<br>5<br>7<br>9 | 0<br>.<br>6<br>9<br>2 | 6.<br>7<br>9<br>E<br>-<br>0<br>8 | 0.<br>31 |  | 1 | 1 | 0 | 20<br>07 | 2<br>0<br>0<br>7 |
| Rh<br>eu<br>ma<br>toi<br>d<br>Ar<br>thr<br>itis | C<br>00<br>03<br>87<br>3 | CD<br>2        | 9<br>1<br>4      | P0672<br>9 | CD2 molecule                                                              |                                                              | 50      | 0<br>.<br>6<br>4<br>1 | 0<br>.<br>5<br>7<br>7 | 0.<br>4<br>7<br>1<br>0<br>8      | 0.<br>31 |  | 1 | 2 | 0 | 20<br>12 | 2<br>0<br>1<br>7 |

|                      |          |           |       |        |                                            |                         |     |       |       |          |      |  |   |   |   |      |      |
|----------------------|----------|-----------|-------|--------|--------------------------------------------|-------------------------|-----|-------|-------|----------|------|--|---|---|---|------|------|
| Rheumatoid Arthritis | C0003873 | LHX2      | 9355  | P50458 | LIM homeobox 2                             | Nucleic acid binding    | 39  | 0.678 | 0.615 | 0.9812   | 0.31 |  | 1 | 1 | 0 | 2007 | 2007 |
| Rheumatoid Arthritis | C0003873 | MA B2 1L2 | 10586 | Q9Y586 | mab-21 like 2                              |                         | 22  | 0.743 | 0.308 | 0.4369   | 0.3  |  | 1 | 1 | 0 | 2007 | 2007 |
| Rheumatoid Arthritis | C0003873 | TX NIP    | 10628 | Q9H3M7 | thioredoxin interacting protein            |                         | 208 | 0.49  | 0.731 | 0.15918  | 0.3  |  | 1 | 1 | 0 | 2009 | 2009 |
| Rheumatoid Arthritis | C0003873 | AB CC 2   | 1244  | Q92887 | ATP binding cassette subfamily C member 2  | Transporter             | 254 | 0.483 | 0.808 | 5.247    | 0.3  |  | 1 | 1 | 0 | 2013 | 2013 |
| Rheumatoid Arthritis | C0003873 | HA PL N1  | 1404  | P10915 | hyaluronan and proteoglycan link protein 1 | Extracellular structure | 36  | 0.633 | 0.577 | 0.6242   | 0.3  |  | 1 | 1 | 0 | 2007 | 2007 |
| Rheumatoid Arthritis | C0003873 | GS DM E   | 1687  | O60443 | gasdermin E                                |                         | 44  | 0.656 | 0.423 | 3.28E-09 | 0.3  |  | 1 | 1 | 0 | 2007 | 2007 |
| Rheumatoid Ar        | C0003873 | F2        | 2147  | P00734 | coagulation factor II, thrombin            | Enzyme                  | 490 | 0.415 | 0.885 | 0.011    | 0.3  |  | 1 | 1 | 0 | 2015 | 2015 |

|                                                 |                          |                |                            |            |                                                                                                                                                                                               |                                     |         |                       |                       |                                  |         |  |                   |    |   |          |                  |
|-------------------------------------------------|--------------------------|----------------|----------------------------|------------|-----------------------------------------------------------------------------------------------------------------------------------------------------------------------------------------------|-------------------------------------|---------|-----------------------|-----------------------|----------------------------------|---------|--|-------------------|----|---|----------|------------------|
| thr<br>itis                                     |                          |                |                            |            |                                                                                                                                                                                               |                                     |         |                       |                       | 1<br>2                           |         |  |                   |    |   |          |                  |
| Rh<br>eu<br>ma<br>toi<br>d<br>Ar<br>thr<br>itis | C<br>00<br>03<br>87<br>3 | LY<br>96       | 2<br>3<br>6<br>4<br>3      | Q9Y6<br>Y9 | lymphoc<br>yte<br>antigen<br>96                                                                                                                                                               | Re<br>ce<br>pto<br>r                | 54      | 0<br>.<br>6<br>3<br>6 | 0<br>.<br>6<br>1<br>5 | 7.<br>4<br>2<br>E<br>-<br>0<br>5 | 0.<br>3 |  | 1                 | 1  | 0 | 20<br>07 | 2<br>0<br>0<br>7 |
| Rh<br>eu<br>ma<br>toi<br>d<br>Ar<br>thr<br>itis | C<br>00<br>03<br>87<br>3 | GA<br>RT       | 2<br>6<br>1<br>8           | P2210<br>2 | phospho<br>ribosylgl<br>ycinami<br>de<br>formyltr<br>ansferas<br>e,<br>phospho<br>ribosylgl<br>ycinami<br>de<br>syntheta<br>se,<br>phospho<br>ribosyla<br>minoimi<br>dazole<br>syntheta<br>se | En<br>zy<br>me                      | 48      | 0<br>.<br>6<br>3<br>1 | 0<br>.<br>6<br>1<br>5 | 0.<br>0<br>0<br>0<br>2<br>7<br>7 | 0.<br>3 |  | 1                 | 1  | 0 | 20<br>13 | 2<br>0<br>1<br>3 |
| Rh<br>eu<br>ma<br>toi<br>d<br>Ar<br>thr<br>itis | C<br>00<br>03<br>87<br>3 | RG<br>MB       | 2<br>8<br>5<br>7<br>0<br>4 | Q6N<br>W40 | repulsive<br>guidance<br>molecule<br>BMP<br>receptor b                                                                                                                                        | co-                                 | 24      | 0<br>.<br>7<br>1<br>1 | 0<br>.<br>4<br>6<br>2 | 0.<br>0<br>7<br>1<br>9<br>5<br>5 | 0.<br>3 |  | 1                 | 1  | 0 | 20<br>07 | 2<br>0<br>0<br>7 |
| Rh<br>eu<br>ma<br>toi<br>d<br>Ar<br>thr<br>itis | C<br>00<br>03<br>87<br>3 | NR<br>3C<br>1  | 2<br>9<br>0<br>8           | P0415<br>0 | nuclear<br>receptor<br>subfamil<br>y 3<br>group C<br>member<br>1                                                                                                                              | Nu<br>cle<br>ar<br>rec<br>ept<br>or | 59<br>0 | 0<br>.<br>3<br>9<br>3 | 0<br>.<br>8<br>8<br>5 | 0.<br>9<br>6<br>9<br>5<br>8      | 0.<br>3 |  | 0.<br>8<br>8<br>9 | 18 | 3 | 20<br>01 | 2<br>0<br>1<br>9 |
| Rh<br>eu<br>ma<br>toi<br>d<br>Ar<br>thr<br>itis | C<br>00<br>03<br>87<br>3 | HO<br>XD<br>11 | 3<br>2<br>3<br>7           | P3127<br>7 | homeobox<br>D11                                                                                                                                                                               |                                     | 45      | 0<br>.<br>6<br>7      | 0<br>.<br>4<br>6<br>2 | 0.<br>0<br>0<br>1<br>1<br>4<br>2 | 0.<br>3 |  | 1                 | 1  | 0 | 20<br>07 | 2<br>0<br>0<br>7 |

|                      |          |        |      |        |                                                       |                      |     |       |        |         |     |  |   |   |   |      |      |
|----------------------|----------|--------|------|--------|-------------------------------------------------------|----------------------|-----|-------|--------|---------|-----|--|---|---|---|------|------|
| Rheumatoid Arthritis | C0003873 | IRF8   | 3394 | Q02556 | interferon regulatory factor 8                        | Transcription factor | 149 | 0.539 | 0.8807 | 0.9407  | 0.3 |  | 1 | 1 | 0 | 2012 | 2012 |
| Rheumatoid Arthritis | C0003873 | ITGA6  | 3655 | P23229 | integrin subunit alpha 6                              |                      | 137 | 0.539 | 0.769  | 1.907   | 0.3 |  | 1 | 1 | 0 | 2007 | 2007 |
| Rheumatoid Arthritis | C0003873 | LCN2   | 3934 | P80188 | lipocalin 2                                           | Enzyme               | 497 | 0.405 | 0.885  | 1.409   | 0.3 |  | 1 | 1 | 0 | 1995 | 1995 |
| Rheumatoid Arthritis | C0003873 | MARCKS | 4082 | P29966 | myristoylated alanine rich protein kinase C substrate |                      | 102 | 0.59  | 0.769  | 0.3648  | 0.3 |  | 1 | 1 | 0 | 2009 | 2009 |
| Rheumatoid Arthritis | C0003873 | RAB8A  | 4218 | P61006 | RAB8A, member RAS oncogene family                     |                      | 69  | 0.61  | 0.577  | 0.9743  | 0.3 |  | 1 | 1 | 0 | 2003 | 2003 |
| Rheumatoid Arthritis | C0003873 | PLEK   | 5341 | P08567 | pleckstrin                                            | Cellular structure   | 83  | 0.588 | 0.731  | 0.01067 | 0.3 |  | 1 | 1 | 0 | 2003 | 2003 |
| Rheumatoid Ar        | C0003873 | POU3F1 | 5453 | Q03052 | POU class 3 homeobox 1                                |                      | 25  | 0.711 | 0.462  | 0.54669 | 0.3 |  | 1 | 1 | 0 | 2012 | 2012 |



|                                                 |                          |                      |                       |            |                                                                           |                      |         |           |           |              |          |  |   |   |   |          |                  |
|-------------------------------------------------|--------------------------|----------------------|-----------------------|------------|---------------------------------------------------------------------------|----------------------|---------|-----------|-----------|--------------|----------|--|---|---|---|----------|------------------|
| thr<br>itis                                     |                          |                      |                       |            |                                                                           |                      |         |           |           |              |          |  |   |   |   |          |                  |
| Rh<br>eu<br>ma<br>toi<br>d<br>Ar<br>thr<br>itis | C<br>00<br>03<br>87<br>3 | DD<br>IT4            | 5<br>4<br>5<br>4<br>1 | Q9N<br>X09 | DNA damage<br>inducible<br>transcript 4                                   |                      | 92      | 0<br>.576 | 0<br>.769 | 0.<br>00683  | 0.<br>03 |  | 1 | 1 | 0 | 20<br>07 | 2<br>0<br>0<br>7 |
| Rh<br>eu<br>ma<br>toi<br>d<br>Ar<br>thr<br>itis | C<br>00<br>03<br>87<br>3 | GI<br>N1             | 5<br>4<br>8<br>2<br>6 | Q9N<br>XP7 | gypsy<br>retrotransposo<br>n integrase 1                                  |                      | 4       | 0<br>.89  | 0<br>.269 | 2.<br>42E-05 | 0.<br>3  |  | 1 | 1 | 0 | 20<br>12 | 2<br>0<br>1<br>2 |
| Rh<br>eu<br>ma<br>toi<br>d<br>Ar<br>thr<br>itis | C<br>00<br>03<br>87<br>3 | BA<br>IAP<br>2L1     | 5<br>5<br>9<br>7<br>1 | Q9U<br>HR4 | BAR/IM<br>D<br>domain<br>containi<br>ng<br>adaptor<br>protein 2<br>like 1 | Re<br>ce<br>pto<br>r | 15      | 0<br>.805 | 0<br>.308 | 0.<br>00104  | 0.<br>03 |  | 1 | 1 | 0 | 20<br>07 | 2<br>0<br>0<br>7 |
| Rh<br>eu<br>ma<br>toi<br>d<br>Ar<br>thr<br>itis | C<br>00<br>03<br>87<br>3 | PS<br>G5             | 5<br>6<br>7<br>3      | Q152<br>38 | pregnancy<br>specific beta-<br>1-glycoprotein<br>5                        |                      | 61      | 0<br>.631 | 0<br>.615 | 8.<br>82E-22 | 0.<br>3  |  | 1 | 1 | 0 | 20<br>07 | 2<br>0<br>0<br>7 |
| Rh<br>eu<br>ma<br>toi<br>d<br>Ar<br>thr<br>itis | C<br>00<br>03<br>87<br>3 | ND<br>UF<br>A4<br>L2 | 5<br>6<br>9<br>0<br>1 | Q9NR<br>X3 | NDUFA<br>4<br>mitocho<br>ndrial<br>complex<br>associat<br>ed like 2       | En<br>zy<br>me       | 19      | 0<br>.736 | 0<br>.346 | 0.<br>00867  | 0.<br>03 |  | 1 | 1 | 0 | 20<br>09 | 2<br>0<br>0<br>9 |
| Rh<br>eu<br>ma<br>toi<br>d<br>Ar<br>thr<br>itis | C<br>00<br>03<br>87<br>3 | PT<br>K2             | 5<br>7<br>4<br>7      | Q053<br>97 | protein<br>tyrosine<br>kinase 2                                           | Ki<br>nas<br>e       | 20<br>5 | 0<br>.497 | 0<br>.808 | 0.<br>9987   | 0.<br>03 |  | 1 | 1 | 0 | 20<br>03 | 2<br>0<br>0<br>3 |
| Rh<br>eu<br>ma<br>toi                           | C<br>00<br>03            | RA<br>P2<br>A        | 5<br>9<br>1<br>1      | P1011<br>4 | RAP2A,<br>member<br>of RAS                                                | En<br>zy<br>me<br>mo | 19      | 0<br>.7   | 0<br>.5   | 0.<br>850    | 0.<br>03 |  | 1 | 1 | 0 | 20<br>03 | 2<br>0<br>0<br>3 |

|                                                 |                          |                 |                  |                       |                                                                         |                                                              |         |                       |                       |                                  |         |  |   |    |   |          |                  |
|-------------------------------------------------|--------------------------|-----------------|------------------|-----------------------|-------------------------------------------------------------------------|--------------------------------------------------------------|---------|-----------------------|-----------------------|----------------------------------|---------|--|---|----|---|----------|------------------|
| d<br>Ar<br>thr<br>itis                          | 87<br>3                  |                 |                  |                       | oncogen<br>e family                                                     | dul<br>ato<br>r                                              |         | 5<br>1                | 3<br>8                | 6<br>8                           |         |  |   |    |   |          |                  |
| Rh<br>eu<br>ma<br>toi<br>d<br>Ar<br>thr<br>itis | C<br>00<br>03<br>87<br>3 | BD<br>KR<br>B2  | 6<br>2<br>4      | P3041<br>1            | bradykin<br>in<br>receptor<br>B2                                        | G-<br>pro<br>tei<br>n<br>co<br>upl<br>ed<br>rec<br>ept<br>or | 10<br>5 | 0<br>.<br>5<br>8<br>5 | 0<br>.<br>8<br>0<br>8 | 0.<br>1<br>1<br>8<br>6<br>3      | 0.<br>3 |  | 1 | 1  | 0 | 20<br>03 | 2<br>0<br>0<br>3 |
| Rh<br>eu<br>ma<br>toi<br>d<br>Ar<br>thr<br>itis | C<br>00<br>03<br>87<br>3 | CX<br>CL<br>6   | 6<br>3<br>7<br>2 | P8016<br>2            | C-X-C<br>motif<br>chemoki<br>ne<br>ligand 6                             | Sig<br>nal<br>ing                                            | 90      | 0<br>.<br>5<br>8<br>2 | 0<br>.<br>6<br>9<br>2 | 2.<br>7<br>1<br>E<br>-<br>0<br>9 | 0.<br>3 |  | 1 | 1  | 0 | 20<br>04 | 2<br>0<br>0<br>4 |
| Rh<br>eu<br>ma<br>toi<br>d<br>Ar<br>thr<br>itis | C<br>00<br>03<br>87<br>3 | TL<br>E3        | 7<br>0<br>9<br>0 | Q047<br>26            | TLE<br>family<br>member<br>3,<br>transcrip<br>tional<br>corepres<br>sor | Tr<br>ans<br>cri<br>pti<br>on<br>fac<br>tor                  | 38      | 0<br>.<br>6<br>7<br>4 | 0<br>.<br>4<br>6<br>2 | 1                                | 0.<br>3 |  | 1 | 1  | 0 | 20<br>12 | 2<br>0<br>1<br>2 |
| Rh<br>eu<br>ma<br>toi<br>d<br>Ar<br>thr<br>itis | C<br>00<br>03<br>87<br>3 | TM<br>PO        | 7<br>1<br>1<br>2 | P4216<br>6;P42<br>167 | thymopo<br>ietin                                                        | Sig<br>nal<br>ing                                            | 58      | 0<br>.<br>6<br>3<br>1 | 0<br>.<br>5<br>7<br>7 | 1.<br>5<br>5<br>E<br>-<br>0<br>7 | 0.<br>3 |  | 1 | 1  | 0 | 20<br>03 | 2<br>0<br>0<br>3 |
| Rh<br>eu<br>ma<br>toi<br>d<br>Ar<br>thr<br>itis | C<br>00<br>03<br>87<br>3 | TN<br>FAI<br>P2 | 7<br>1<br>2<br>7 | Q031<br>69            | TNF<br>alpha<br>induced<br>protein 2                                    | Tr<br>ans<br>por<br>ter                                      | 25      | 0<br>.<br>7<br>1<br>1 | 0<br>.<br>4<br>2<br>3 | 8.<br>2<br>5<br>E<br>-<br>0<br>5 | 0.<br>3 |  | 1 | 1  | 0 | 20<br>09 | 2<br>0<br>0<br>9 |
| Rh<br>eu<br>ma<br>toi<br>d<br>Ar<br>thr<br>itis | C<br>00<br>03<br>87<br>3 | ZF<br>P36       | 7<br>5<br>3<br>8 | P2665<br>1            | ZFP36<br>ring<br>finger<br>protein                                      | Nu<br>cle<br>ic<br>aci<br>d<br>bin<br>din<br>g               | 16<br>1 | 0<br>.<br>5<br>2<br>3 | 0<br>.<br>6<br>9<br>2 | 0.<br>7<br>5<br>2<br>4<br>4      | 0.<br>3 |  | 1 | 13 | 0 | 20<br>04 | 2<br>0<br>1<br>9 |

|                      |          |             |       |        |                                                               |                      |     |       |       |          |     |  |   |   |   |      |      |
|----------------------|----------|-------------|-------|--------|---------------------------------------------------------------|----------------------|-----|-------|-------|----------|-----|--|---|---|---|------|------|
| Rheumatoid Arthritis | C0003873 | TFPI2       | 7980  | P48307 | tissue factor pathway inhibitor 2                             | Enzyme modulator     | 161 | 0.521 | 0.769 | 0.0843   | 0.3 |  | 1 | 2 | 0 | 2004 | 2007 |
| Rheumatoid Arthritis | C0003873 | CALD1       | 800   | Q05682 | caldesmon 1                                                   |                      | 94  | 0.578 | 0.692 | 0.9879   | 0.3 |  | 1 | 1 | 0 | 2004 | 2004 |
| Rheumatoid Arthritis | C0003873 | ST6GALNACT5 | 81849 | Q9BVH7 | ST6 N-acetylgalactosaminide alpha-2,6-sialyltransferase 5     |                      | 23  | 0.729 | 0.346 | 0.1967   | 0.3 |  | 1 | 2 | 0 | 2007 | 2007 |
| Rheumatoid Arthritis | C0003873 | MGAR        | 84709 | Q8TDB4 | mitochondria localized glutamic acid rich protein             |                      | 1   | 1     | 0.115 | 3.88E-05 | 0.3 |  | 1 | 1 | 0 | 2007 | 2007 |
| Rheumatoid Arthritis | C0003873 | B3GN        | 84752 | Q6UX72 | UDP-GlcNAc:betaGal beta-1,3-N-acetylglucosaminyltransferase 9 | Enzyme               | 1   | 1     | 0.115 | 1.74E-05 | 0.3 |  | 1 | 1 | 0 | 2007 | 2007 |
| Rheumatoid Arthritis | C0003873 | RUNX2       | 8660  | Q13950 | RUNX family transcription factor 2                            | Transcription factor | 405 | 0.437 | 0.846 | 0.984    | 0.3 |  | 1 | 1 | 0 | 2010 | 2010 |
| Rheumatoid Arthritis | C0003873 | SLC25A12    | 8604  | O75746 | solute carrier family 25                                      | Transporter          | 34  | 0.711 | 0.462 | 0.216    | 0.3 |  | 1 | 1 | 0 | 2003 | 2003 |

|                                                 |                          |                |                  |            |                                                                                         |                         |         |                       |                       |                                  |          |  |   |    |   |          |                  |
|-------------------------------------------------|--------------------------|----------------|------------------|------------|-----------------------------------------------------------------------------------------|-------------------------|---------|-----------------------|-----------------------|----------------------------------|----------|--|---|----|---|----------|------------------|
| Ar<br>thr<br>itis                               |                          |                |                  |            | member<br>12                                                                            |                         |         |                       |                       | 0<br>4                           |          |  |   |    |   |          |                  |
| Rh<br>eu<br>ma<br>toi<br>d<br>Ar<br>thr<br>itis | C<br>00<br>03<br>87<br>3 | CD<br>3E       | 9<br>1<br>6      | P0776<br>6 | CD3e<br>molecule                                                                        |                         | 73      | 0<br>.<br>6<br>1<br>5 | 0<br>.<br>6<br>1<br>5 | 0.<br>0<br>0<br>0<br>3<br>4<br>5 | 0.<br>3  |  | 1 | 1  | 0 | 20<br>03 | 2<br>0<br>0<br>3 |
| Rh<br>eu<br>ma<br>toi<br>d<br>Ar<br>thr<br>itis | C<br>00<br>03<br>87<br>3 | CD<br>5        | 9<br>2<br>1      | P0612<br>7 | CD5 molecule                                                                            |                         | 32      | 0<br>.<br>6<br>8<br>2 | 0<br>.<br>3<br>0<br>8 | 2.<br>3<br>1<br>E<br>-<br>1<br>0 | 0.<br>3  |  | 1 | 1  | 0 | 20<br>12 | 2<br>0<br>1<br>2 |
| Rh<br>eu<br>ma<br>toi<br>d<br>Ar<br>thr<br>itis | C<br>00<br>03<br>87<br>3 | AB<br>CG<br>2  | 9<br>4<br>2<br>9 | Q9U<br>NQ0 | ATP<br>binding<br>cassette<br>subfamil<br>y G<br>member<br>2 (Junior<br>blood<br>group) | Tr<br>ans<br>por<br>ter | 42<br>0 | 0<br>.<br>4<br>1<br>9 | 0<br>.<br>8<br>8<br>5 | 2.<br>1<br>E<br>-<br>3<br>2      | 0.<br>3  |  | 1 | 1  | 1 | 20<br>13 | 2<br>0<br>1<br>3 |
| Rh<br>eu<br>ma<br>toi<br>d<br>Ar<br>thr<br>itis | C<br>00<br>03<br>87<br>3 | M<br>MP<br>14  | 4<br>3<br>2<br>3 | P5028<br>1 | matrix<br>metallo<br>peptidase<br>14                                                    | En<br>zy<br>me          | 34<br>0 | 0<br>.<br>4<br>4<br>7 | 0<br>.<br>7<br>6<br>9 | 0.<br>9<br>9<br>5<br>2<br>2      | 0.<br>28 |  | 1 | 11 | 0 | 19<br>98 | 2<br>0<br>1<br>3 |
| Rh<br>eu<br>ma<br>toi<br>d<br>Ar<br>thr<br>itis | C<br>00<br>03<br>87<br>3 | ZA<br>P70      | 7<br>5<br>3<br>5 | P4340<br>3 | zeta<br>chain of<br>T cell<br>receptor<br>associat<br>ed<br>protein<br>kinase<br>70     | Ki<br>nas<br>e          | 21<br>2 | 0<br>.<br>4<br>9<br>7 | 0<br>.<br>7<br>6<br>9 | 0.<br>8<br>7<br>6<br>9<br>6      | 0.<br>24 |  | 1 | 6  | 0 | 20<br>03 | 2<br>0<br>1<br>9 |
| Rh<br>eu<br>ma<br>toi<br>d<br>Ar<br>thr<br>itis | C<br>00<br>03<br>87<br>3 | DN<br>AS<br>E2 | 1<br>7<br>7<br>7 | O001<br>15 | deoxyrib<br>onucleas<br>e 2,<br>lysosom<br>al                                           | En<br>zy<br>me          | 29      | 0<br>.<br>7           | 0<br>.<br>4<br>6<br>2 | 0.<br>0<br>0<br>0<br>4<br>5<br>2 | 0.<br>23 |  | 1 | 3  | 0 | 20<br>09 | 2<br>0<br>1<br>2 |

|                      |          |              |        |        |                                               |     |       |       |          |      |  |       |    |    |      |      |
|----------------------|----------|--------------|--------|--------|-----------------------------------------------|-----|-------|-------|----------|------|--|-------|----|----|------|------|
| Rheumatoid Arthritis | C0003873 | HN RN PA 2B1 | 3181   | P22626 | heterogeneous nuclear ribonucleoprotein A2/B1 | 131 | 0.566 | 0.888 | 0.99732  | 0.21 |  | 1     | 2  | 0  | 2002 | 2007 |
| Rheumatoid Arthritis | C0003873 | CD226        | 1066   | Q15762 | CD226 molecule                                | 124 | 0.548 | 0.769 | 0.03921  | 0.2  |  | 0.909 | 11 | 2  | 2009 | 2018 |
| Rheumatoid Arthritis | C0003873 | PA DI2       | 11240  | Q9Y2J8 | peptidyl arginine deiminase 2                 | 67  | 0.61  | 0.615 | 4.95E-11 | 0.2  |  | 0.857 | 14 | 5  | 2004 | 2019 |
| Rheumatoid Arthritis | C0003873 | FC RL3       | 115352 | Q96P31 | Fc receptor like 3                            | 62  | 0.612 | 0.769 | 5.97E-21 | 0.2  |  | 0.857 | 28 | 4  | 2005 | 2016 |
| Rheumatoid Arthritis | C0003873 | HL A-A       | 3105   | P04439 | major histocompatibility complex, class I, A  | 672 | 0.37  | 0.846 | 0.00133  | 0.2  |  | 1     | 17 | 2  | 1981 | 2014 |
| Rheumatoid Arthritis | C0003873 | HL A-B       | 3106   | P01889 | major histocompatibility complex, class I, B  | 706 | 0.379 | 0.885 | 3.86E-05 | 0.2  |  | 1     | 16 | 45 | 1982 | 2018 |
| Rheumatoid Ar        | C0003873 | HL A-C       | 3107   | P10321 | major histocompatibility complex, class I, C  | 435 | 0.415 | 0.846 | 1.57E-6  | 0.2  |  | 0.944 | 18 | 14 | 1993 | 2019 |

|                                                 |                          |                      |                   |            |                                                                                |                                    |         |                       |                       |                                  |               |  |                   |    |   |          |                  |
|-------------------------------------------------|--------------------------|----------------------|-------------------|------------|--------------------------------------------------------------------------------|------------------------------------|---------|-----------------------|-----------------------|----------------------------------|---------------|--|-------------------|----|---|----------|------------------|
| thr<br>itis                                     |                          |                      |                   |            |                                                                                |                                    |         |                       | 0<br>6                |                                  |               |  |                   |    |   |          |                  |
| Rh<br>eu<br>ma<br>toi<br>d<br>Ar<br>thr<br>itis | C<br>00<br>03<br>87<br>3 | HL<br>A-<br>DQ<br>A1 | 3<br>1<br>1<br>7  | P0190<br>9 | major<br>histoco<br>mpatibil<br>ity<br>complex<br>, class II,<br>DQ<br>alpha 1 | Im<br>mu<br>ne<br>res<br>po<br>nse | 42<br>7 | 0<br>.<br>4<br>1<br>6 | 0<br>.<br>8<br>4<br>6 | 0.<br>0<br>2<br>3<br>9<br>4<br>7 | 0.<br>0<br>2  |  | 0.<br>9<br>6<br>2 | 26 | 8 | 19<br>90 | 2<br>0<br>1<br>6 |
| Rh<br>eu<br>ma<br>toi<br>d<br>Ar<br>thr<br>itis | C<br>00<br>03<br>87<br>3 | HL<br>A-<br>DQ<br>B1 | 3<br>1<br>1<br>9  | P0192<br>0 | major<br>histoco<br>mpatibil<br>ity<br>complex<br>, class II,<br>DQ beta<br>1  | Im<br>mu<br>ne<br>res<br>po<br>nse | 50<br>4 | 0<br>.<br>4<br>0<br>7 | 0<br>.<br>8<br>8<br>5 | 0.<br>0<br>0<br>8<br>9<br>2<br>6 | 0.<br>0<br>2  |  | 1                 | 14 | 4 | 19<br>97 | 2<br>0<br>1<br>7 |
| Rh<br>eu<br>ma<br>toi<br>d<br>Ar<br>thr<br>itis | C<br>00<br>03<br>87<br>3 | ISG<br>20            | 3<br>6<br>6<br>9  | Q96A<br>Z6 | interferon<br>stimulated<br>exonuclease<br>gene 20                             |                                    | 41<br>4 | 0<br>.<br>4<br>1<br>4 | 0<br>.<br>8<br>4<br>6 | 0.<br>0<br>0<br>2<br>8<br>9<br>9 | 0.<br>0<br>2  |  | 1                 | 17 | 1 | 19<br>92 | 2<br>0<br>1<br>8 |
| Rh<br>eu<br>ma<br>toi<br>d<br>Ar<br>thr<br>itis | C<br>00<br>03<br>87<br>3 | TA<br>P2             | 6<br>8<br>9<br>1  | Q035<br>19 | transport<br>er 2,<br>ATP<br>binding<br>cassette<br>subfamil<br>y B<br>member  | Tr<br>ans<br>por<br>ter            | 15<br>5 | 0<br>.<br>5<br>1<br>7 | 0<br>.<br>8<br>0<br>8 | 6.<br>8<br>9<br>E<br>-<br>1<br>1 | 0.<br>0<br>2  |  | 1                 | 14 | 7 | 19<br>94 | 2<br>0<br>1<br>6 |
| Rh<br>eu<br>ma<br>toi<br>d<br>Ar<br>thr<br>itis | C<br>00<br>03<br>87<br>3 | DP<br>P4             | 1<br>8<br>0<br>3  | P2748<br>7 | dipeptid<br>yl<br>peptidas<br>e 4                                              | En<br>zy<br>me                     | 45<br>1 | 0<br>.<br>4<br>2      | 0<br>.<br>8<br>0<br>8 | 7.<br>2<br>8<br>E<br>-<br>0<br>9 | 0.<br>0<br>19 |  | 0.<br>9           | 10 | 1 | 20<br>14 | 2<br>0<br>1<br>9 |
| Rh<br>eu<br>ma<br>toi<br>d<br>Ar<br>thr<br>itis | C<br>00<br>03<br>87<br>3 | AI<br>RE             | 3<br>2<br>6       | O439<br>18 | autoimmune<br>regulator                                                        |                                    | 17<br>5 | 0<br>.<br>5<br>1<br>6 | 0<br>.<br>8<br>0<br>8 | 4.<br>0<br>5<br>E<br>-<br>1<br>2 | 0.<br>0<br>19 |  | 1                 | 9  | 7 | 20<br>11 | 2<br>0<br>1<br>9 |
| Rh<br>eu<br>ma<br>toi                           | C<br>00<br>03            | MI<br>CA             | 1.<br>0<br>1<br>E | Q299<br>83 | MHC class I<br>polypeptide-<br>related<br>sequence A                           |                                    | 24<br>8 | 0<br>.<br>4           | 0<br>.<br>8           | 0.<br>0<br>0<br>4                | 0.<br>0<br>18 |  | 1                 | 11 | 8 | 20<br>01 | 2<br>0<br>1<br>9 |

|                                                 |                          |                     |                  |            |                                                                          |                                                            |         |                       |                       |                                  |          |  |         |    |    |          |                  |
|-------------------------------------------------|--------------------------|---------------------|------------------|------------|--------------------------------------------------------------------------|------------------------------------------------------------|---------|-----------------------|-----------------------|----------------------------------|----------|--|---------|----|----|----------|------------------|
| d<br>Ar<br>thr<br>itis                          | 87<br>3                  |                     | +<br>0<br>8      |            |                                                                          |                                                            |         | 7<br>3                | 4<br>6                | 9<br>7                           |          |  |         |    |    |          |                  |
| Rh<br>eu<br>ma<br>toi<br>d<br>Ar<br>thr<br>itis | C<br>00<br>03<br>87<br>3 | HL<br>A-<br>DM<br>B | 3<br>1<br>0<br>9 | P2806<br>8 | major<br>histoco<br>mpatibil<br>ity<br>complex<br>, class II,<br>DM beta | Im<br>mu<br>ne<br>res<br>po<br>nse                         | 41      | 0<br>.<br>6<br>3<br>8 | 0<br>.<br>6<br>1<br>5 | 0.<br>0<br>2<br>4<br>6<br>3      | 0.<br>18 |  | 0.<br>8 | 10 | 5  | 19<br>97 | 2<br>0<br>0<br>9 |
| Rh<br>eu<br>ma<br>toi<br>d<br>Ar<br>thr<br>itis | C<br>00<br>03<br>87<br>3 | AT<br>G5            | 9<br>4<br>7<br>4 | Q9H1<br>Y0 | autopha<br>gy<br>related 5                                               | Tr<br>ans<br>por<br>ter                                    | 28<br>2 | 0<br>.<br>4<br>6<br>2 | 0<br>.<br>8<br>8<br>5 | 0.<br>9<br>7<br>7<br>5<br>8      | 0.<br>17 |  | 1       | 11 | 4  | 20<br>04 | 2<br>0<br>1<br>9 |
| Rh<br>eu<br>ma<br>toi<br>d<br>Ar<br>thr<br>itis | C<br>00<br>03<br>87<br>3 | AIF<br>1            | 1<br>9<br>9      | P5500<br>8 | allograft<br>inflamm<br>atory<br>factor 1                                | Ca<br>lci<br>um<br>-<br>bin<br>din<br>g<br>pro<br>tei<br>n | 16<br>6 | 0<br>.<br>5<br>2<br>1 | 0<br>.<br>8<br>0<br>8 | 1.<br>8<br>8<br>E<br>-<br>0<br>6 | 0.<br>16 |  | 1       | 8  | 5  | 20<br>07 | 2<br>0<br>1<br>8 |
| Rh<br>eu<br>ma<br>toi<br>d<br>Ar<br>thr<br>itis | C<br>00<br>03<br>87<br>3 | C5                  | 7<br>2<br>7      | P0103<br>1 | comple<br>ment C5                                                        | En<br>zy<br>me<br>mo<br>dul<br>ato<br>r                    | 12<br>9 | 0<br>.<br>5<br>5      | 0<br>.<br>7<br>3<br>1 | 8.<br>0<br>8<br>E<br>-<br>2<br>4 | 0.<br>16 |  | 1       | 8  | 3  | 20<br>07 | 2<br>0<br>1<br>3 |
| Rh<br>eu<br>ma<br>toi<br>d<br>Ar<br>thr<br>itis | C<br>00<br>03<br>87<br>3 | ME<br>CP<br>2       | 4<br>2<br>0<br>4 | P5160<br>8 | methyl-<br>CpG<br>binding<br>protein 2                                   | Ep<br>ige<br>net<br>ic<br>reg<br>ula<br>tor                | 66<br>4 | 0<br>.<br>4<br>1<br>4 | 0<br>.<br>8<br>4<br>6 | 0.<br>8<br>9<br>3<br>8<br>2      | 0.<br>15 |  | 1       | 6  | 1  | 20<br>13 | 2<br>0<br>1<br>8 |
| Rh<br>eu<br>ma<br>toi<br>d<br>Ar<br>thr<br>itis | C<br>00<br>03<br>87<br>3 | NO<br>TC<br>H4      | 4<br>8<br>5<br>5 | Q994<br>66 | notch receptor<br>4                                                      |                                                            | 15<br>0 | 0<br>.<br>5<br>3<br>4 | 0<br>.<br>7<br>3<br>1 | 2.<br>0<br>5<br>E<br>-<br>2<br>3 | 0.<br>15 |  | 1       | 8  | 25 | 20<br>01 | 2<br>0<br>1<br>3 |

|                      |          |          |       |        |                                                        |                            |     |       |       |          |      |  |       |   |    |      |      |
|----------------------|----------|----------|-------|--------|--------------------------------------------------------|----------------------------|-----|-------|-------|----------|------|--|-------|---|----|------|------|
| Rheumatoid Arthritis | C0003873 | TNIP1    | 10318 | Q15025 | TNFAIP3 interacting protein 1                          |                            | 93  | 0.564 | 0.769 | 0.459    | 0.14 |  | 1     | 5 | 1  | 2003 | 2019 |
| Rheumatoid Arthritis | C0003873 | CCR3     | 1232  | P51677 | C-C motif chemokine receptor 3                         | G-protein coupled receptor | 149 | 0.527 | 0.808 | 0.00126  | 0.14 |  | 1     | 5 | 1  | 1997 | 2017 |
| Rheumatoid Arthritis | C0003873 | HLA-DOA  | 3111  | P06340 | major histocompatibility complex, class II, DO alpha   | Immune response            | 160 | 0.509 | 0.808 | 2.98-10  | 0.14 |  | 1     | 7 | 11 | 1986 | 2016 |
| Rheumatoid Arthritis | C0003873 | HLA-DPA1 | 3113  | P20036 | major histocompatibility complex, class II, DP alpha 1 | Immune response            | 139 | 0.552 | 0.846 | 2.5-06   | 0.14 |  | 0.857 | 7 | 8  | 1990 | 2017 |
| Rheumatoid Arthritis | C0003873 | PTPN11   | 5781  | Q06124 | protein tyrosine phosphatase non-receptor type 11      |                            | 702 | 0.385 | 0.923 | 0.998    | 0.14 |  | 1     | 5 | 1  | 2003 | 2019 |
| Rheumatoid Arthritis | C0003873 | CFB      | 629   | P00751 | complement factor B                                    |                            | 139 | 0.532 | 0.769 | 4.67E-16 | 0.14 |  | 0.857 | 7 | 7  | 1985 | 2015 |
| Rheumatoid           | C0003    | SFTPD    | 6441  | P35247 | surfactant protein D                                   | Surfactant                 | 194 | 0.5   | 0.89  | 7.49E    | 0.14 |  | 0.833 | 6 | 2  | 2008 | 2019 |



|                                                 |                          |                      |                            |            |                                                      |                   |         |                       |                       |                                  |          |  |                   |   |         |          |                  |
|-------------------------------------------------|--------------------------|----------------------|----------------------------|------------|------------------------------------------------------|-------------------|---------|-----------------------|-----------------------|----------------------------------|----------|--|-------------------|---|---------|----------|------------------|
| d<br>Ar<br>thr<br>itis                          | 87<br>3                  |                      |                            |            |                                                      |                   |         |                       | 4<br>6                | -<br>0<br>5                      |          |  |                   |   |         |          |                  |
| Rh<br>eu<br>ma<br>toi<br>d<br>Ar<br>thr<br>itis | C<br>00<br>03<br>87<br>3 | TS<br>BP<br>1        | 1<br>0<br>6<br>6<br>5      | Q5SR<br>N2 | testis<br>expressed<br>basic protein 1               |                   | 48      | 0<br>.<br>6<br>3<br>8 | 0<br>.<br>6<br>9<br>2 | 1.<br>4<br>8<br>E<br>-<br>1<br>6 | 0.<br>13 |  | 0.<br>8<br>8<br>9 | 9 | 14<br>9 | 20<br>07 | 2<br>0<br>1<br>9 |
| Rh<br>eu<br>ma<br>toi<br>d<br>Ar<br>thr<br>itis | C<br>00<br>03<br>87<br>3 | CC<br>L27            | 1<br>0<br>8<br>5<br>0      | Q9Y4<br>X3 | C-C<br>motif<br>chemoki<br>ne<br>ligand<br>27        | Sig<br>nal<br>ing | 18<br>5 | 0<br>.<br>5<br>0<br>2 | 0<br>.<br>8<br>4<br>6 | 0.<br>0<br>1<br>3<br>5<br>1<br>1 | 0.<br>13 |  | 1                 | 4 | 1       | 20<br>03 | 2<br>0<br>1<br>9 |
| Rh<br>eu<br>ma<br>toi<br>d<br>Ar<br>thr<br>itis | C<br>00<br>03<br>87<br>3 | PS<br>OR<br>S1<br>C1 | 1<br>7<br>0<br>6<br>7<br>9 | Q9UI<br>G5 | psoriasis<br>susceptibility<br>1 candidate 1         |                   | 43      | 0<br>.<br>6<br>5<br>6 | 0<br>.<br>7<br>3<br>1 | 0.<br>0<br>0<br>2<br>6<br>5      | 0.<br>13 |  | 1                 | 5 | 11      | 20<br>07 | 2<br>0<br>1<br>7 |
| Rh<br>eu<br>ma<br>toi<br>d<br>Ar<br>thr<br>itis | C<br>00<br>03<br>87<br>3 | MI<br>CB             | 4<br>2<br>7<br>7           | Q299<br>80 | MHC class I<br>polypeptide-<br>related<br>sequence B |                   | 95      | 0<br>.<br>5<br>7<br>6 | 0<br>.<br>7<br>3<br>1 | 4.<br>0<br>6<br>E<br>-<br>0<br>5 | 0.<br>13 |  | 1                 | 4 | 1       | 20<br>01 | 2<br>0<br>1<br>9 |
| Rh<br>eu<br>ma<br>toi<br>d<br>Ar<br>thr<br>itis | C<br>00<br>03<br>87<br>3 | AP<br>OM             | 5<br>5<br>9<br>3<br>7      | O954<br>45 | apolipoprotein<br>M                                  |                   | 82      | 0<br>.<br>5<br>9      | 0<br>.<br>7<br>6<br>9 | 0.<br>0<br>0<br>9<br>5<br>6      | 0.<br>13 |  | 1                 | 5 | 5       | 20<br>07 | 2<br>0<br>1<br>4 |
| Rh<br>eu<br>ma<br>toi<br>d<br>Ar<br>thr<br>itis | C<br>00<br>03<br>87<br>3 | RA<br>D5<br>1B       | 5<br>8<br>9<br>0           | O153<br>15 | RAD51<br>paralog B                                   |                   | 12<br>6 | 0<br>.<br>5<br>5<br>6 | 0<br>.<br>7<br>6<br>9 | 2.<br>0<br>8<br>E<br>-<br>1<br>5 | 0.<br>13 |  | 1                 | 7 | 3       | 20<br>13 | 2<br>0<br>1<br>9 |

|                      |          |        |       |        |                                      |        |     |       |       |         |      |  |   |   |    |      |      |
|----------------------|----------|--------|-------|--------|--------------------------------------|--------|-----|-------|-------|---------|------|--|---|---|----|------|------|
| Rheumatoid Arthritis | C0003873 | BACH2  | 60468 | Q9BYV9 | BTB domain and CNC homolog 2         |        | 130 | 0.539 | 0.731 | 0.9803  | 0.13 |  | 1 | 5 | 1  | 2012 | 2016 |
| Rheumatoid Arthritis | C0003873 | PRRC2A | 7916  | P48634 | proline rich coiled-coil 2A          | Enzyme | 45  | 0.656 | 0.654 | 1       | 0.13 |  | 1 | 6 | 15 | 1998 | 2011 |
| Rheumatoid Arthritis | C0003873 | DDX39B | 7919  | Q13838 | DExD-box helicase 39B                |        | 50  | 0.641 | 0.88  | 0.9725  | 0.13 |  | 1 | 6 | 8  | 2001 | 2011 |
| Rheumatoid Arthritis | C0003873 | LSIT1  | 7940  | O00453 | leukocyte specific transcript 1      |        | 17  | 0.792 | 0.38  | 0.013   | 0.13 |  | 1 | 6 | 2  | 2006 | 2016 |
| Rheumatoid Arthritis | C0003873 | CDSN   | 1041  | Q15517 | corneodesmosin                       |        | 101 | 0.585 | 0.731 | 0.46391 | 0.12 |  | 1 | 3 | 2  | 2002 | 2013 |
| Rheumatoid Arthritis | C0003873 | RPP14  | 11102 | O95059 | ribonuclease P/MRP subunit p14       |        | 117 | 0.544 | 0.88  | 0.01927 | 0.12 |  | 1 | 5 | 1  | 1990 | 2019 |
| Rheumatoid Ar        | C0003873 | ICOSLG | 23308 | O75144 | inducible T cell costimulator ligand |        | 69  | 0.601 | 0.654 | 0.003   | 0.12 |  | 1 | 4 | 3  | 2003 | 2019 |

|                                                 |                          |                     |                       |            |                                                           |                                                |         |                       |                       |                                  |          |  |                   |   |    |          |                  |
|-------------------------------------------------|--------------------------|---------------------|-----------------------|------------|-----------------------------------------------------------|------------------------------------------------|---------|-----------------------|-----------------------|----------------------------------|----------|--|-------------------|---|----|----------|------------------|
| thr<br>itis                                     |                          |                     |                       |            |                                                           |                                                |         |                       |                       | 5<br>5                           |          |  |                   |   |    |          |                  |
| Rh<br>eu<br>ma<br>toi<br>d<br>Ar<br>thr<br>itis | C<br>00<br>03<br>87<br>3 | PH<br>F19           | 2<br>6<br>1<br>4<br>7 | Q5T6<br>S3 | PHD<br>finger<br>protein<br>19                            | Nu<br>cle<br>ic<br>aci<br>d<br>bin<br>din<br>g | 28      | 0<br>.<br>7<br>1<br>6 | 0<br>.<br>3<br>8<br>5 | 0.<br>9<br>9<br>4<br>6           | 0.<br>12 |  | 0.<br>8<br>5<br>7 | 7 | 6  | 20<br>07 | 2<br>0<br>1<br>9 |
| Rh<br>eu<br>ma<br>toi<br>d<br>Ar<br>thr<br>itis | C<br>00<br>03<br>87<br>3 | UB<br>AS<br>H3<br>A | 5<br>3<br>3<br>4<br>7 | P5707<br>5 | ubiquitin<br>associated and<br>SH3 domain<br>containing A |                                                | 43      | 0<br>.<br>6<br>3<br>8 | 0<br>.<br>5<br>3<br>8 | 1.<br>0<br>5<br>E<br>-<br>1<br>0 | 0.<br>12 |  | 1                 | 6 | 4  | 20<br>14 | 2<br>0<br>1<br>9 |
| Rh<br>eu<br>ma<br>toi<br>d<br>Ar<br>thr<br>itis | C<br>00<br>03<br>87<br>3 | PR<br>KC<br>H       | 5<br>5<br>8<br>3      | P2472<br>3 | protein<br>kinase C<br>eta                                | Ki<br>nas<br>e                                 | 55      | 0<br>.<br>6<br>5<br>3 | 0<br>.<br>5<br>7<br>7 | 0.<br>4<br>2<br>8<br>7<br>8      | 0.<br>12 |  | 1                 | 5 | 4  | 20<br>07 | 2<br>0<br>1<br>9 |
| Rh<br>eu<br>ma<br>toi<br>d<br>Ar<br>thr<br>itis | C<br>00<br>03<br>87<br>3 | GS<br>DM<br>B       | 5<br>5<br>8<br>7<br>6 | Q8TA<br>X9 | gasdermin B                                               |                                                | 44      | 0<br>.<br>6<br>7      | 0<br>.<br>5           | 3.<br>3<br>4<br>E<br>-<br>0<br>7 | 0.<br>12 |  | 1                 | 3 | 1  | 20<br>12 | 2<br>0<br>1<br>2 |
| Rh<br>eu<br>ma<br>toi<br>d<br>Ar<br>thr<br>itis | C<br>00<br>03<br>87<br>3 | BT<br>NL<br>2       | 5<br>6<br>2<br>4<br>4 | Q9UI<br>R0 | butyrop<br>hilin like<br>2                                | En<br>zy<br>me<br>mo<br>dul<br>ato<br>r        | 14<br>5 | 0<br>.<br>5<br>4<br>6 | 0<br>.<br>8<br>0<br>8 | 8.<br>5<br>6<br>E<br>-<br>1<br>1 | 0.<br>12 |  | 1                 | 6 | 31 | 20<br>05 | 2<br>0<br>1<br>3 |
| Rh<br>eu<br>ma<br>toi<br>d<br>Ar<br>thr<br>itis | C<br>00<br>03<br>87<br>3 | CO<br>G6            | 5<br>7<br>5<br>1<br>1 | Q9Y2<br>V7 | component of<br>oligomeric<br>golgi complex<br>6          |                                                | 62      | 0<br>.<br>6<br>4<br>4 | 0<br>.<br>5<br>7<br>7 | 6.<br>3<br>6<br>E<br>-<br>1<br>6 | 0.<br>12 |  | 1                 | 2 | 1  | 20<br>16 | 2<br>0<br>1<br>7 |
| Rh<br>eu<br>ma<br>toi                           | C<br>00<br>03            | C2                  | 7<br>1<br>7           | P0668<br>1 | complement<br>C2                                          |                                                | 71      | 0<br>.<br>6           | 0<br>.<br>6           | 1.<br>3<br>5<br>E                | 0.<br>12 |  | 1                 | 5 | 13 | 19<br>76 | 2<br>0<br>1<br>1 |

|                                                 |                          |                      |                       |            |                                                         |                         |         |                       |                       |                                  |          |  |                   |   |   |          |                  |
|-------------------------------------------------|--------------------------|----------------------|-----------------------|------------|---------------------------------------------------------|-------------------------|---------|-----------------------|-----------------------|----------------------------------|----------|--|-------------------|---|---|----------|------------------|
| d<br>Ar<br>thr<br>itis                          | 87<br>3                  |                      |                       |            |                                                         |                         |         | 1<br>7                | 9<br>2                | -<br>1<br>6                      |          |  |                   |   |   |          |                  |
| Rh<br>eu<br>ma<br>toi<br>d<br>Ar<br>thr<br>itis | C<br>00<br>03<br>87<br>3 | UB<br>E2<br>L3       | 7<br>3<br>3<br>2      | P6803<br>6 | ubiquiti<br>n<br>conjugat<br>ing<br>enzyme<br>E2 L3     | En<br>zy<br>me          | 56      | 0<br>.<br>6<br>4<br>4 | 0<br>.<br>6<br>1<br>5 | 0.<br>8<br>3<br>8<br>4<br>4      | 0.<br>12 |  | 0.<br>6<br>6<br>7 | 3 | 1 | 20<br>11 | 2<br>0<br>1<br>7 |
| Rh<br>eu<br>ma<br>toi<br>d<br>Ar<br>thr<br>itis | C<br>00<br>03<br>87<br>3 | NE<br>LF<br>E        | 7<br>9<br>3<br>6      | P1861<br>5 | negative<br>elongation<br>factor<br>complex<br>member E |                         | 40      | 0<br>.<br>6<br>8<br>6 | 0<br>.<br>5           | 0.<br>0<br>0<br>6<br>8<br>9<br>5 | 0.<br>12 |  | 0.<br>6<br>6<br>7 | 3 | 8 | 19<br>97 | 2<br>0<br>1<br>1 |
| Rh<br>eu<br>ma<br>toi<br>d<br>Ar<br>thr<br>itis | C<br>00<br>03<br>87<br>3 | KI<br>AA<br>110<br>9 | 8<br>4<br>1<br>6<br>2 | Q2LD<br>37 | KIAA11<br>09                                            |                         | 86      | 0<br>.<br>6<br>0<br>3 | 0<br>.<br>6<br>5<br>4 | 3.<br>2<br>6<br>E<br>-<br>2<br>1 | 0.<br>12 |  | 1                 | 3 | 2 | 20<br>09 | 2<br>0<br>1<br>0 |
| Rh<br>eu<br>ma<br>toi<br>d<br>Ar<br>thr<br>itis | C<br>00<br>03<br>87<br>3 | CA<br>SP1<br>0       | 8<br>4<br>3           | Q928<br>51 | caspase<br>10                                           | En<br>zy<br>me          | 16<br>6 | 0<br>.<br>5<br>2<br>8 | 0<br>.<br>6<br>9<br>2 | 4.<br>6<br>4<br>E<br>-<br>1<br>2 | 0.<br>12 |  | 1                 | 3 | 1 | 20<br>03 | 2<br>0<br>1<br>9 |
| Rh<br>eu<br>ma<br>toi<br>d<br>Ar<br>thr<br>itis | C<br>00<br>03<br>87<br>3 | MA<br>CI<br>R        | 9<br>0<br>3<br>5<br>5 | Q96G<br>V9 | macrophage<br>immunometab<br>olism<br>regulator         |                         | 32      | 0<br>.<br>6<br>9<br>1 | 0<br>.<br>4<br>6<br>2 | 0.<br>4<br>2<br>7<br>4<br>6      | 0.<br>12 |  | 1                 | 8 | 3 | 20<br>10 | 2<br>0<br>1<br>9 |
| Rh<br>eu<br>ma<br>toi<br>d<br>Ar<br>thr<br>itis | C<br>00<br>03<br>87<br>3 | SY<br>NG<br>R1       | 9<br>1<br>4<br>5      | O437<br>59 | synapto<br>gyrin 1                                      | Tr<br>ans<br>por<br>ter | 17      | 0<br>.<br>7<br>3<br>6 | 0<br>.<br>3<br>4<br>6 | 0.<br>4<br>5<br>1<br>2<br>1      | 0.<br>12 |  | 1                 | 5 | 1 | 20<br>14 | 2<br>0<br>1<br>9 |

|                      |          |         |       |        |                                                   |     |       |       |          |      |  |   |   |   |      |      |
|----------------------|----------|---------|-------|--------|---------------------------------------------------|-----|-------|-------|----------|------|--|---|---|---|------|------|
| Rheumatoid Arthritis | C0003873 | CD247   | 919   | P20963 | CD247 molecule                                    | 140 | 0.539 | 0.731 | 0.06734  | 0.12 |  | 1 | 3 | 4 | 2012 | 2016 |
| Rheumatoid Arthritis | C0003873 | COL4A1  | 1282  | P02462 | collagen type IV alpha 1 chain                    | 277 | 0.484 | 0.731 | 1        | 0.11 |  | 1 | 1 | 1 | 2018 | 2018 |
| Rheumatoid Arthritis | C0003873 | COL11A2 | 1302  | P13942 | collagen type XI alpha 2 chain                    | 399 | 0.435 | 0.846 | 0.797    | 0.11 |  | 1 | 3 | 3 | 2007 | 2011 |
| Rheumatoid Arthritis | C0003873 | DAXX    | 1616  | Q9UER7 | death domain associated protein                   | 137 | 0.544 | 0.692 | 0.0633   | 0.11 |  | 1 | 2 | 1 | 2007 | 2011 |
| Rheumatoid Arthritis | C0003873 | ETFA    | 2108  | P13804 | electron transfer flavoprotein subunit alpha      | 195 | 0.508 | 0.719 | 0.0222   | 0.11 |  | 1 | 2 | 1 | 2013 | 2018 |
| Rheumatoid Arthritis | C0003873 | RTKN2   | 21970 | Q8IZC4 | rhotekin 2                                        | 22  | 0.722 | 0.385 | 5.46E-15 | 0.11 |  | 1 | 1 | 1 | 2012 | 2012 |
| Rheumatoid Ar        | C0003873 | HSPA1L  | 3305  | P34931 | heat shock protein family A (Hsp70) member 1 like | 65  | 0.603 | 0.654 | 1.06E-   | 0.11 |  | 1 | 4 | 2 | 2000 | 2011 |

|                                                 |                          |                      |                            |            |                                                     |                         |         |                       |                       |                                  |          |  |   |   |   |          |                  |
|-------------------------------------------------|--------------------------|----------------------|----------------------------|------------|-----------------------------------------------------|-------------------------|---------|-----------------------|-----------------------|----------------------------------|----------|--|---|---|---|----------|------------------|
| thr<br>itis                                     |                          |                      |                            |            |                                                     |                         |         |                       |                       | 0<br>6                           |          |  |   |   |   |          |                  |
| Rh<br>eu<br>ma<br>toi<br>d<br>Ar<br>thr<br>itis | C<br>00<br>03<br>87<br>3 | IC<br>AM<br>3        | 3<br>3<br>8<br>5           | P3294<br>2 | intercellular<br>adhesion<br>molecule 3             |                         | 59      | 0<br>.<br>6<br>1<br>9 | 0<br>.<br>6<br>5<br>4 | 2.<br>7<br>3<br>E<br>-<br>2<br>5 | 0.<br>11 |  | 1 | 2 | 1 | 20<br>03 | 2<br>0<br>1<br>7 |
| Rh<br>eu<br>ma<br>toi<br>d<br>Ar<br>thr<br>itis | C<br>00<br>03<br>87<br>3 | SM<br>TN<br>L2       | 3<br>4<br>2<br>5<br>2<br>7 | Q2TA<br>L5 | smoothelin<br>like 2                                |                         | 1       | 1                     | 0<br>.<br>1<br>1<br>5 | 0.<br>0<br>0<br>0<br>2<br>3<br>8 | 0.<br>11 |  | 1 | 1 | 1 | 20<br>17 | 2<br>0<br>1<br>7 |
| Rh<br>eu<br>ma<br>toi<br>d<br>Ar<br>thr<br>itis | C<br>00<br>03<br>87<br>3 | IL1<br>2R<br>B2      | 3<br>5<br>9<br>5           | Q996<br>65 | interleuk<br>in 12<br>receptor<br>subunit<br>beta 2 | Sig<br>nal<br>ing       | 59      | 0<br>.<br>6<br>0<br>8 | 0<br>.<br>6<br>9<br>2 | 1.<br>6<br>2<br>E<br>-<br>0<br>9 | 0.<br>11 |  | 1 | 2 | 1 | 20<br>18 | 2<br>0<br>1<br>9 |
| Rh<br>eu<br>ma<br>toi<br>d<br>Ar<br>thr<br>itis | C<br>00<br>03<br>87<br>3 | FA<br>DS<br>1        | 3<br>9<br>9<br>2           | O604<br>27 | fatty acid<br>desaturase 1                          |                         | 12<br>5 | 0<br>.<br>5<br>8<br>2 | 0<br>.<br>7<br>6<br>9 | 0.<br>3<br>7<br>3<br>8<br>4      | 0.<br>11 |  | 1 | 4 | 1 | 20<br>09 | 2<br>0<br>1<br>9 |
| Rh<br>eu<br>ma<br>toi<br>d<br>Ar<br>thr<br>itis | C<br>00<br>03<br>87<br>3 | MB<br>P              | 4<br>1<br>5<br>5           | P0268<br>6 | myelin protein                                      | basic                   | 18<br>4 | 0<br>.<br>5<br>1      | 0<br>.<br>8<br>8<br>5 | 0.<br>2<br>8<br>4<br>4<br>6      | 0.<br>11 |  | 1 | 1 | 1 | 20<br>11 | 2<br>0<br>1<br>1 |
| Rh<br>eu<br>ma<br>toi<br>d<br>Ar<br>thr<br>itis | C<br>00<br>03<br>87<br>3 | EM<br>CN             | 5<br>1<br>7<br>0<br>5      | Q9UL<br>C0 | endomucin                                           |                         | 25      | 0<br>.<br>7<br>1<br>6 | 0<br>.<br>4<br>2<br>3 | 8.<br>6<br>4<br>E<br>-<br>0<br>5 | 0.<br>11 |  | 1 | 2 | 2 | 20<br>11 | 2<br>0<br>1<br>8 |
| Rh<br>eu<br>ma<br>toi                           | C<br>00<br>03            | AT<br>P6<br>V1<br>G2 | 5<br>3<br>4                | O956<br>70 | ATPase<br>H+<br>transport<br>ing V1                 | Tr<br>ans<br>por<br>ter | 7       | 0<br>.<br>8           | 0<br>.<br>2           | 0.<br>0<br>0<br>2                | 0.<br>11 |  | 1 | 3 | 3 | 20<br>01 | 2<br>0<br>1<br>1 |

|                                                 |                          |                     |                       |            |                                                        |                                             |         |                       |                                 |                                  |          |   |   |   |          |                  |                  |
|-------------------------------------------------|--------------------------|---------------------|-----------------------|------------|--------------------------------------------------------|---------------------------------------------|---------|-----------------------|---------------------------------|----------------------------------|----------|---|---|---|----------|------------------|------------------|
| d<br>Ar<br>thr<br>itis                          | 87<br>3                  |                     |                       |            | subunit<br>G2                                          |                                             |         | 3<br>9                | 6<br>9                          | 8<br>6                           |          |   |   |   |          |                  |                  |
| Rh<br>eu<br>ma<br>toi<br>d<br>Ar<br>thr<br>itis | C<br>00<br>03<br>87<br>3 | SU<br>PT<br>20<br>H | 5<br>5<br>5<br>7<br>8 | Q8NE<br>M7 | SPT20<br>homolog<br>, SAGA<br>complex<br>compon<br>ent | Tr<br>ans<br>cri<br>pti<br>on<br>fac<br>tor | 18      | 0<br>.<br>7<br>5<br>1 | 0<br>.<br>3<br>4<br>6           | 2.<br>7<br>3<br>E<br>-<br>1<br>4 | 0.<br>11 |   | 1 | 1 | 1        | 20<br>19         | 2<br>0<br>1<br>9 |
| Rh<br>eu<br>ma<br>toi<br>d<br>Ar<br>thr<br>itis | C<br>00<br>03<br>87<br>3 | PS<br>MB<br>8       | 5<br>6<br>9<br>6      | P2806<br>2 | proteasome<br>20S subunit<br>beta 8                    |                                             | 16<br>5 | 0<br>.<br>5<br>3<br>3 | 0<br>.<br>8<br>0<br>8           | 0.<br>0<br>2<br>1<br>7<br>9<br>5 | 0.<br>11 |   | 1 | 3 | 4        | 19<br>98         | 2<br>0<br>0<br>9 |
| Rh<br>eu<br>ma<br>toi<br>d<br>Ar<br>thr<br>itis | C<br>00<br>03<br>87<br>3 | PS<br>MB<br>9       | 5<br>6<br>9<br>8      | P2806<br>5 | proteasome<br>20S subunit<br>beta 9                    |                                             | 16<br>7 | 0<br>.<br>5<br>1<br>4 | 0<br>.<br>8<br>0<br>2<br>7<br>5 | 0.<br>0<br>11                    |          | 1 | 2 | 3 | 19<br>98 | 2<br>0<br>0<br>9 |                  |
| Rh<br>eu<br>ma<br>toi<br>d<br>Ar<br>thr<br>itis | C<br>00<br>03<br>87<br>3 | W<br>DF<br>Y4       | 5<br>7<br>7<br>0<br>5 | Q6ZS<br>81 | WDFY family<br>member 4                                |                                             | 10      | 0<br>.<br>7<br>9<br>2 | 0<br>.<br>1<br>9<br>2           | 0.<br>3<br>4<br>0<br>0<br>9      | 0.<br>11 |   | 1 | 5 | 3        | 20<br>09         | 2<br>0<br>1<br>9 |
| Rh<br>eu<br>ma<br>toi<br>d<br>Ar<br>thr<br>itis | C<br>00<br>03<br>87<br>3 | RA<br>RB            | 5<br>9<br>1<br>5      | P1082<br>6 | retinoic<br>acid<br>receptor<br>beta                   | Nu<br>cle<br>ar<br>rec<br>ept<br>or         | 25<br>4 | 0<br>.<br>4<br>7<br>8 | 0<br>.<br>8<br>4<br>6           | 0.<br>9<br>9<br>8<br>3           | 0.<br>11 |   | 1 | 1 | 1        | 20<br>19         | 2<br>0<br>1<br>9 |
| Rh<br>eu<br>ma<br>toi<br>d<br>Ar<br>thr<br>itis | C<br>00<br>03<br>87<br>3 | GP<br>SM<br>3       | 6<br>3<br>9<br>4<br>0 | Q9Y4<br>H4 | G protein<br>signaling<br>modulator 3                  |                                             | 17      | 0<br>.<br>7<br>5<br>1 | 0<br>.<br>4<br>2<br>3           | 0.<br>2<br>8<br>6<br>4<br>1      | 0.<br>11 |   | 1 | 3 | 4        | 20<br>07         | 2<br>0<br>1<br>6 |

|                      |          |         |       |        |                                                    |            |       |       |          |      |  |   |   |    |      |      |
|----------------------|----------|---------|-------|--------|----------------------------------------------------|------------|-------|-------|----------|------|--|---|---|----|------|------|
| Rheumatoid Arthritis | C0003873 | CARD9   | 64170 | Q9H257 | caspase recruitment domain family member 9         | 103        | 0.566 | 0.54  | 8.15E-13 | 0.11 |  | 1 | 2 | 1  | 2015 | 2019 |
| Rheumatoid Arthritis | C0003873 | TNXB    | 7148  | P22105 | tenascin XB                                        | 127        | 0.572 | 0.731 | 0.018547 | 0.11 |  | 1 | 4 | 23 | 2001 | 2011 |
| Rheumatoid Arthritis | C0003873 | TPD52   | 7163  | P55327 | tumor protein D52                                  | 76         | 0.597 | 0.692 | 8.49E-05 | 0.11 |  | 1 | 3 | 1  | 2001 | 2019 |
| Rheumatoid Arthritis | C0003873 | MPIG6B  | 80739 | O95866 | megakaryocyte and platelet inhibitory receptor G6b | 30         | 0.695 | 0.65  | 1.08E-06 | 0.11 |  | 1 | 2 | 1  | 2000 | 2011 |
| Rheumatoid Arthritis | C0003873 | TMEM187 | 8269  | Q14656 | transmembrane protein 187                          | 8          | 0.839 | 0.231 | 0.01577  | 0.11 |  | 1 | 2 | 1  | 2012 | 2017 |
| Rheumatoid Arthritis | C0003873 | MYO18B  | 84700 | Q8IUG5 | myosin XVIIIIB                                     | 63         | 0.628 | 0.615 | 1.03E-31 | 0.11 |  | 1 | 2 | 1  | 2013 | 2019 |
| Rheumatoid Ar        | C0003873 | NTN1    | 9423  | O95631 | netrin 1                                           | Enzyme mod | 209   | 0.509 | 0.84687  | 0.11 |  | 1 | 2 | 1  | 2009 | 2009 |



|                                                 |                          |                       |                       |            |                                                                  |                   |         |                       |                       |                                  |          |  |   |    |   |          |                  |
|-------------------------------------------------|--------------------------|-----------------------|-----------------------|------------|------------------------------------------------------------------|-------------------|---------|-----------------------|-----------------------|----------------------------------|----------|--|---|----|---|----------|------------------|
| thr<br>itis                                     |                          |                       |                       |            |                                                                  | ato<br>r          |         |                       |                       |                                  |          |  |   |    |   |          |                  |
| Rh<br>eu<br>ma<br>toi<br>d<br>Ar<br>thr<br>itis | C<br>00<br>03<br>87<br>3 | SH<br>3P<br>XD<br>2A  | 9<br>6<br>4<br>4      | Q5TC<br>Z1 | SH3 and PX<br>domains 2A                                         |                   | 32      | 0<br>.<br>7<br>2<br>9 | 0<br>.<br>3<br>8<br>5 | 0.<br>9<br>8<br>9<br>7           | 0.<br>11 |  | 1 | 2  | 1 | 20<br>17 | 2<br>0<br>1<br>9 |
| Rh<br>eu<br>ma<br>toi<br>d<br>Ar<br>thr<br>itis | C<br>00<br>03<br>87<br>3 | EL<br>MO<br>1         | 9<br>8<br>4<br>4      | Q925<br>56 | engulfm<br>ent and<br>cell<br>motility<br>1                      | Sig<br>nal<br>ing | 72      | 0<br>.<br>6<br>0<br>8 | 0<br>.<br>6<br>1<br>5 | 0.<br>8<br>9<br>9<br>7           | 0.<br>11 |  | 1 | 3  | 2 | 20<br>12 | 2<br>0<br>1<br>6 |
| Rh<br>eu<br>ma<br>toi<br>d<br>Ar<br>thr<br>itis | C<br>00<br>03<br>87<br>3 | NA<br>T2              | 1<br>0                | P1124<br>5 | N-<br>acetyltra<br>nsferase<br>2                                 | En<br>zy<br>me    | 31<br>1 | 0<br>.<br>4<br>5<br>1 | 0<br>.<br>8<br>8<br>5 | 3.<br>2<br>7<br>E<br>-<br>0<br>6 | 0.<br>1  |  | 1 | 10 | 3 | 20<br>02 | 2<br>0<br>1<br>2 |
| Rh<br>eu<br>ma<br>toi<br>d<br>Ar<br>thr<br>itis | C<br>00<br>03<br>87<br>3 | ZD<br>HH<br>C2<br>OP2 | 1<br>E<br>+<br>0<br>8 |            | zinc finger<br>DHHC-type<br>containing 20<br>pseudogene 2        |                   | 3       | 0<br>.<br>8<br>9      | 0<br>.<br>1<br>9<br>2 |                                  | 0.<br>1  |  | 1 | 1  | 1 | 20<br>11 | 2<br>0<br>1<br>1 |
| Rh<br>eu<br>ma<br>toi<br>d<br>Ar<br>thr<br>itis | C<br>00<br>03<br>87<br>3 | TM<br>PO<br>P1        | 1<br>E<br>+<br>0<br>8 |            | thymopoietin<br>pseudogene 1                                     |                   | 2       | 1                     | 0<br>.<br>1<br>1<br>5 |                                  | 0.<br>1  |  | 1 | 2  | 1 | 20<br>07 | 2<br>0<br>0<br>9 |
| Rh<br>eu<br>ma<br>toi<br>d<br>Ar<br>thr<br>itis | C<br>00<br>03<br>87<br>3 | W<br>AK<br>MA<br>R2   | 1<br>E<br>+<br>0<br>8 |            | wound and<br>keratinocyte<br>migration<br>associated<br>lncRNA 2 |                   | 2       | 0<br>.<br>9<br>3<br>1 | 0<br>.<br>1<br>1<br>5 |                                  | 0.<br>1  |  | 1 | 1  | 1 | 20<br>17 | 2<br>0<br>1<br>7 |
| Rh<br>eu<br>ma<br>toi                           | C<br>00<br>03            | HN<br>RN<br>PA<br>1P2 | 1<br>E<br>+           |            | heterogeneous<br>nuclear<br>ribonucleoprot                       |                   | 2       | 1                     | 0<br>.<br>1           |                                  | 0.<br>1  |  | 1 | 1  | 1 | 20<br>11 | 2<br>0<br>1<br>1 |

|                                                 |                          |                           |                                  |            |                                                                         |    |                       |                                 |         |         |  |   |   |    |          |                  |
|-------------------------------------------------|--------------------------|---------------------------|----------------------------------|------------|-------------------------------------------------------------------------|----|-----------------------|---------------------------------|---------|---------|--|---|---|----|----------|------------------|
| d<br>Ar<br>thr<br>itis                          | 87<br>3                  |                           | 0<br>8                           |            | ein A1<br>pseudogene 2                                                  |    |                       | 1<br>5                          |         |         |  |   |   |    |          |                  |
| Rh<br>eu<br>ma<br>toi<br>d<br>Ar<br>thr<br>itis | C<br>00<br>03<br>87<br>3 | NO<br>NO<br>P2            | 1<br>E<br>+<br>0<br>8            |            | non-POU<br>domain<br>containing,<br>octamer-<br>binding<br>pseudogene 2 | 6  | 0<br>.<br>8<br>6<br>1 | 0<br>.<br>2<br>3<br>1           |         | 0.<br>1 |  | 1 | 1 | 1  | 20<br>09 | 2<br>0<br>0<br>9 |
| Rh<br>eu<br>ma<br>toi<br>d<br>Ar<br>thr<br>itis | C<br>00<br>03<br>87<br>3 | UB<br>DP<br>1             | 1<br>E<br>+<br>0<br>8            |            | ubiquitin D<br>pseudogene 1                                             | 2  | 1                     | 0<br>.<br>1<br>1<br>5           |         | 0.<br>1 |  | 1 | 1 | 1  | 20<br>09 | 2<br>0<br>0<br>9 |
| Rh<br>eu<br>ma<br>toi<br>d<br>Ar<br>thr<br>itis | C<br>00<br>03<br>87<br>3 | AP<br>4B<br>1-<br>AS<br>1 | 1<br>E<br>+<br>0<br>8            |            | AP4B1<br>antisense<br>RNA 1                                             | 13 | 0<br>.<br>8<br>0<br>5 | 0<br>.<br>2<br>3<br>1           |         | 0.<br>1 |  | 1 | 2 | 12 | 20<br>09 | 2<br>0<br>1<br>9 |
| Rh<br>eu<br>ma<br>toi<br>d<br>Ar<br>thr<br>itis | C<br>00<br>03<br>87<br>3 | CY<br>P4F<br>23P          | 1<br>E<br>+<br>0<br>8            |            | cytochrome<br>P450 family 4<br>subfamily F<br>member 23,<br>pseudogene  | 1  | 1                     | 0<br>.<br>1<br>1<br>5           |         | 0.<br>1 |  | 1 | 1 | 1  | 20<br>13 | 2<br>0<br>1<br>3 |
| Rh<br>eu<br>ma<br>toi<br>d<br>Ar<br>thr<br>itis | C<br>00<br>03<br>87<br>3 | PS<br>MB<br>8-<br>AS<br>1 | 1.<br>0<br>1<br>E<br>+<br>0<br>8 |            | PSMB8<br>antisense<br>RNA 1 (head<br>to head)                           | 6  | 0<br>.<br>8<br>3<br>9 | 0<br>.<br>3<br>8<br>5           |         | 0.<br>1 |  | 1 | 1 | 3  | 20<br>09 | 2<br>0<br>0<br>9 |
| Rh<br>eu<br>ma<br>toi<br>d<br>Ar<br>thr<br>itis | C<br>00<br>03<br>87<br>3 | MU<br>C2<br>2             | 1.<br>0<br>1<br>E<br>+<br>0<br>8 | E2RY<br>F6 | mucin<br>22                                                             | 19 | 0<br>.<br>7<br>2<br>9 | 0<br>.<br>5<br>4<br>0<br>4<br>7 | 0.<br>1 | 0.<br>1 |  | 1 | 2 | 6  | 20<br>07 | 2<br>0<br>0<br>9 |
| Rh<br>eu                                        | C<br>00                  | MS<br>H5-                 | 1.<br>0                          |            | MSH5-<br>SAPCD1                                                         | 21 | 0<br>.                | 0<br>.                          |         | 0.<br>1 |  | 1 | 3 | 10 | 20<br>07 | 2<br>0           |

|                                                 |                          |                                         |                                  |            |                                                          |         |                       |                       |                                  |         |  |                   |    |   |          |                  |
|-------------------------------------------------|--------------------------|-----------------------------------------|----------------------------------|------------|----------------------------------------------------------|---------|-----------------------|-----------------------|----------------------------------|---------|--|-------------------|----|---|----------|------------------|
| ma<br>toi<br>d<br>Ar<br>thr<br>itis             | 03<br>87<br>3            | SA<br>PC<br>D1                          | 1<br>E<br>+<br>0<br>8            |            | readthrough<br>(NMD<br>candidate)                        |         | 7<br>6                | 4<br>2<br>3           |                                  |         |  |                   |    |   |          | 1<br>1           |
| Rh<br>eu<br>ma<br>toi<br>d<br>Ar<br>thr<br>itis | C<br>00<br>03<br>87<br>3 | AT<br>P6<br>V1<br>G2-<br>DD<br>X3<br>9B | 1.<br>0<br>1<br>E<br>+<br>0<br>8 |            | ATP6V1G2-<br>DDX39B<br>readthrough<br>(NMD<br>candidate) | 15      | 0<br>.<br>7<br>6<br>9 | 0<br>.<br>4<br>2<br>3 |                                  | 0.<br>1 |  | 1                 | 3  | 8 | 20<br>07 | 2<br>0<br>1<br>1 |
| Rh<br>eu<br>ma<br>toi<br>d<br>Ar<br>thr<br>itis | C<br>00<br>03<br>87<br>3 | PP<br>T2-<br>EG<br>FL<br>8              | 1.<br>0<br>1<br>E<br>+<br>0<br>8 |            | PPT2-EGFL8<br>readthrough<br>(NMD<br>candidate)          | 17      | 0<br>.<br>7<br>9<br>2 | 0<br>.<br>4<br>6<br>2 |                                  | 0.<br>1 |  | 1                 | 3  | 6 | 20<br>07 | 2<br>0<br>1<br>1 |
| Rh<br>eu<br>ma<br>toi<br>d<br>Ar<br>thr<br>itis | C<br>00<br>03<br>87<br>3 | CD<br>H1<br>1                           | 1<br>0<br>0<br>9                 | P5528<br>7 | cadherin 11                                              | 20<br>3 | 0<br>.<br>5<br>1<br>2 | 0<br>.<br>8<br>0<br>8 | 0.<br>9<br>9<br>9                | 0.<br>1 |  | 0.<br>9<br>1<br>7 | 12 | 0 | 20<br>04 | 2<br>0<br>1<br>9 |
| Rh<br>eu<br>ma<br>toi<br>d<br>Ar<br>thr<br>itis | C<br>00<br>03<br>87<br>3 | TS<br>PA<br>N5                          | 1<br>0<br>0<br>9<br>8            | P6207<br>9 | tetraspanin 5                                            | 9       | 0<br>.<br>7<br>8      | 0<br>.<br>3<br>0<br>8 | 0.<br>9<br>0<br>9<br>5<br>1      | 0.<br>1 |  | 1                 | 1  | 1 | 20<br>13 | 2<br>0<br>1<br>3 |
| Rh<br>eu<br>ma<br>toi<br>d<br>Ar<br>thr<br>itis | C<br>00<br>03<br>87<br>3 | TRI<br>M1<br>0                          | 1<br>0<br>1<br>0<br>7            | Q9U<br>DY6 | tripartite motif<br>containing 10                        | 14      | 0<br>.<br>8<br>2<br>1 | 0<br>.<br>2<br>6<br>9 | 3.<br>7<br>4<br>E<br>-<br>0<br>9 | 0.<br>1 |  | 1                 | 2  | 3 | 20<br>07 | 2<br>0<br>0<br>9 |
| Rh<br>eu<br>ma<br>toi<br>d<br>Ar<br>thr<br>itis | C<br>00<br>03<br>87<br>3 | LI<br>NC<br>019<br>34                   | 1.<br>0<br>2<br>E<br>+<br>0<br>8 |            | long<br>intergenic<br>non-protein<br>coding RNA<br>1934  | 11      | 0<br>.<br>8<br>2<br>1 | 0<br>.<br>3<br>0<br>8 |                                  | 0.<br>1 |  | 1                 | 1  | 1 | 20<br>16 | 2<br>0<br>1<br>6 |

|                      |          |              |          |  |                                            |     |       |       |     |  |   |    |     |      |      |
|----------------------|----------|--------------|----------|--|--------------------------------------------|-----|-------|-------|-----|--|---|----|-----|------|------|
| Rheumatoid Arthritis | C0003873 | LNCPRESS1    | 1.02E+08 |  | lncRNA p53 regulated and ESC associated 1  | 1   | 1     | 0.115 | 0.1 |  | 1 | 1  | 1   | 2019 | 2019 |
| Rheumatoid Arthritis | C0003873 | LINC00824    | 1.02E+08 |  | long intergenic non-protein coding RNA 824 | 24  | 0.695 | 0.346 | 0.1 |  | 1 | 3  | 2   | 2014 | 2019 |
| Rheumatoid Arthritis | C0003873 | TSBP1-AS1    | 1.02E+08 |  | TSBP1 and BTNL2 antisense RNA 1            | 63  | 0.638 | 0.692 | 0.1 |  | 1 | 6  | 221 | 2007 | 2014 |
| Rheumatoid Arthritis | C0003873 | C3orf67-AS1  | 1.02E+08 |  | C3orf67 antisense RNA 1                    | 3   | 0.89  | 0.154 | 0.1 |  | 1 | 1  | 1   | 2019 | 2019 |
| Rheumatoid Arthritis | C0003873 | C2-AS1       | 1.02E+08 |  | C2 antisense RNA 1                         | 10  | 0.821 | 0.912 | 0.1 |  | 1 | 3  | 5   | 2007 | 2011 |
| Rheumatoid Arthritis | C0003873 | HCG9         | 10255    |  | HLA complex group 9                        | 22  | 0.7   | 0.5   | 0.1 |  | 1 | 2  | 2   | 2007 | 2009 |
| Rheumatoid Ar        | C0003873 | LOC102723407 | 1.03E+   |  | immunoglobulin heavy variable 4-38-2-like  | 159 | 0.514 | 0.769 | 0.1 |  | 1 | 10 | 0   | 1993 | 2017 |

|                                                 |                          |                              |                                  |            |                                                                                                       |                                                |         |                       |                       |                                  |         |  |   |    |   |          |                  |
|-------------------------------------------------|--------------------------|------------------------------|----------------------------------|------------|-------------------------------------------------------------------------------------------------------|------------------------------------------------|---------|-----------------------|-----------------------|----------------------------------|---------|--|---|----|---|----------|------------------|
| thr<br>itis                                     |                          |                              | 0<br>8                           |            |                                                                                                       |                                                |         |                       |                       |                                  |         |  |   |    |   |          |                  |
| Rh<br>eu<br>ma<br>toi<br>d<br>Ar<br>thr<br>itis | C<br>00<br>03<br>87<br>3 | AS<br>B1<br>5-<br>AS<br>1    | 1.<br>0<br>3<br>E<br>+<br>0<br>8 |            | ASB15<br>antisense<br>RNA 1                                                                           |                                                | 1       | 1                     | 0<br>.<br>1<br>1<br>5 |                                  | 0.<br>1 |  | 1 | 1  | 1 | 20<br>09 | 2<br>0<br>0<br>9 |
| Rh<br>eu<br>ma<br>toi<br>d<br>Ar<br>thr<br>itis | C<br>00<br>03<br>87<br>3 | LO<br>C1<br>027<br>249<br>71 | 1.<br>0<br>3<br>E<br>+<br>0<br>8 |            | putative V-set<br>and<br>immunoglobul<br>in domain-<br>containing-<br>like protein<br>IGHV4OR15-<br>8 |                                                | 13<br>9 | 0<br>.<br>5<br>2<br>7 | 0<br>.<br>7<br>6<br>9 |                                  | 0.<br>1 |  | 1 | 10 | 0 | 19<br>93 | 2<br>0<br>1<br>7 |
| Rh<br>eu<br>ma<br>toi<br>d<br>Ar<br>thr<br>itis | C<br>00<br>03<br>87<br>3 | ST<br>AG<br>1                | 1<br>0<br>2<br>7<br>4            | Q8W<br>VM7 | stromal<br>antigen<br>1                                                                               | Nu<br>cle<br>ic<br>aci<br>d<br>bin<br>din<br>g | 56      | 0<br>.<br>6<br>5<br>6 | 0<br>.<br>5<br>7<br>7 | 1                                | 0.<br>1 |  | 1 | 2  | 1 | 20<br>14 | 2<br>0<br>1<br>9 |
| Rh<br>eu<br>ma<br>toi<br>d<br>Ar<br>thr<br>itis | C<br>00<br>03<br>87<br>3 | NE<br>BL                     | 1<br>0<br>5<br>2<br>9            | O760<br>41 | nebulette                                                                                             |                                                | 48      | 0<br>.<br>6<br>5      | 0<br>.<br>6<br>9<br>2 | 1.<br>7<br>7<br>E<br>-<br>3<br>6 | 0.<br>1 |  | 1 | 1  | 1 | 20<br>18 | 2<br>0<br>1<br>8 |
| Rh<br>eu<br>ma<br>toi<br>d<br>Ar<br>thr<br>itis | C<br>00<br>03<br>87<br>3 | LI<br>NC<br>023<br>56        | 1.<br>0<br>5<br>E<br>+<br>0<br>8 |            | long<br>intergenic<br>non-protein<br>coding RNA<br>2356                                               |                                                | 7       | 0<br>.<br>9<br>3<br>1 | 0<br>.<br>1<br>1<br>5 |                                  | 0.<br>1 |  | 1 | 2  | 1 | 20<br>14 | 2<br>0<br>1<br>9 |
| Rh<br>eu<br>ma<br>toi<br>d<br>Ar<br>thr<br>itis | C<br>00<br>03<br>87<br>3 | LI<br>NC<br>023<br>57        | 1.<br>0<br>5<br>E<br>+<br>0<br>8 |            | long<br>intergenic<br>non-protein<br>coding RNA<br>2357                                               |                                                | 10      | 0<br>.<br>8<br>0<br>5 | 0<br>.<br>2<br>3<br>1 |                                  | 0.<br>1 |  | 1 | 3  | 4 | 20<br>12 | 2<br>0<br>1<br>5 |
| Rh<br>eu<br>ma<br>toi                           | C<br>00<br>03            | LI<br>NC<br>025<br>71        | 1.<br>0<br>5<br>E                |            | long<br>intergenic<br>non-protein                                                                     |                                                | 28      | 0<br>.<br>7           | 0<br>.<br>5           |                                  | 0.<br>1 |  | 1 | 2  | 9 | 20<br>07 | 2<br>0<br>1<br>1 |

|                                                 |                          |                       |                                  |            |                                                                   |               |         |                       |                       |                             |         |  |   |    |    |          |                  |
|-------------------------------------------------|--------------------------|-----------------------|----------------------------------|------------|-------------------------------------------------------------------|---------------|---------|-----------------------|-----------------------|-----------------------------|---------|--|---|----|----|----------|------------------|
| d<br>Ar<br>thr<br>itis                          | 87<br>3                  |                       | +<br>0<br>8                      |            | coding RNA<br>2571                                                |               |         | 4<br>3                |                       |                             |         |  |   |    |    |          |                  |
| Rh<br>eu<br>ma<br>toi<br>d<br>Ar<br>thr<br>itis | C<br>00<br>03<br>87<br>3 | ET<br>V7-<br>AS<br>1  | 1.<br>0<br>5<br>E<br>+<br>0<br>8 |            | ETV7 and<br>PTX1<br>antisense<br>RNA 1                            |               | 2       | 0<br>.<br>9<br>3<br>1 | 0<br>.<br>1<br>1<br>5 |                             | 0.<br>1 |  | 1 | 2  | 1  | 20<br>14 | 2<br>0<br>1<br>9 |
| Rh<br>eu<br>ma<br>toi<br>d<br>Ar<br>thr<br>itis | C<br>00<br>03<br>87<br>3 | LI<br>NC<br>017<br>48 | 1.<br>0<br>5<br>E<br>+<br>0<br>8 |            | long<br>intergenic<br>non-protein<br>coding RNA<br>1748           |               | 3       | 0<br>.<br>8<br>9      | 0<br>.<br>1<br>5<br>4 |                             | 0.<br>1 |  | 1 | 1  | 1  | 20<br>13 | 2<br>0<br>1<br>3 |
| Rh<br>eu<br>ma<br>toi<br>d<br>Ar<br>thr<br>itis | C<br>00<br>03<br>87<br>3 | AG<br>PA<br>T1        | 1<br>0<br>5<br>5<br>4            | Q999<br>43 | 1-<br>acylglycerol-<br>3-phosphate<br>O-<br>acyltransferas<br>e 1 |               | 18      | 0<br>.<br>7<br>4<br>3 | 0<br>.<br>4<br>2<br>3 | 0.<br>9<br>7<br>2<br>1<br>5 | 0.<br>1 |  | 1 | 1  | 10 | 20<br>11 | 2<br>0<br>1<br>1 |
| Rh<br>eu<br>ma<br>toi<br>d<br>Ar<br>thr<br>itis | C<br>00<br>03<br>87<br>3 | CX<br>CL<br>13        | 1<br>0<br>5<br>6<br>3            | O439<br>27 | C-X-C<br>motif<br>chemoki<br>ne<br>ligand<br>13                   | Signal<br>ing | 24<br>6 | 0<br>.<br>4<br>7<br>2 | 0<br>.<br>7<br>3<br>1 | 0.<br>8<br>2<br>5<br>6<br>6 | 0.<br>1 |  | 1 | 13 | 0  | 20<br>01 | 2<br>0<br>2<br>0 |
| Rh<br>eu<br>ma<br>toi<br>d<br>Ar<br>thr<br>itis | C<br>00<br>03<br>87<br>3 | AH<br>SA<br>1         | 1<br>0<br>5<br>9<br>8            | O954<br>33 | activator of<br>HSP90<br>ATPase<br>activity 1                     |               | 52<br>6 | 0<br>.<br>3<br>9<br>6 | 0<br>.<br>9<br>2<br>3 | 0.<br>9<br>8<br>9<br>6      | 0.<br>1 |  | 1 | 23 | 1  | 20<br>03 | 2<br>0<br>1<br>9 |
| Rh<br>eu<br>ma<br>toi<br>d<br>Ar<br>thr<br>itis | C<br>00<br>03<br>87<br>3 | CD<br>C4<br>2E<br>P3  | 1<br>0<br>6<br>0<br>2            | Q9U<br>KI2 | CDC42<br>effector<br>protein 3                                    |               | 24      | 0<br>.<br>7<br>2<br>2 | 0<br>.<br>4<br>2<br>3 | 0.<br>1<br>8<br>5<br>6<br>2 | 0.<br>1 |  | 1 | 1  | 1  | 20<br>19 | 2<br>0<br>1<br>9 |
| Rh<br>eu                                        | C<br>00                  | EH<br>MT              | 1.<br>0                          |            | EHMT2 and<br>SLC44A4                                              |               | 14      | 0<br>.                | 0<br>.                |                             | 0.<br>1 |  | 1 | 3  | 4  | 20<br>07 | 2<br>0           |

|                                                 |                          |                       |                                  |            |                                                              |         |                       |                                 |                                  |         |  |   |    |   |          |                  |
|-------------------------------------------------|--------------------------|-----------------------|----------------------------------|------------|--------------------------------------------------------------|---------|-----------------------|---------------------------------|----------------------------------|---------|--|---|----|---|----------|------------------|
| ma<br>toi<br>d<br>Ar<br>thr<br>itis             | 03<br>87<br>3            | 2-<br>AS<br>1         | 6<br>E<br>+<br>0<br>8            |            | antisense<br>RNA 1                                           |         | 7<br>8                | 4<br>6<br>2                     |                                  |         |  |   |    |   |          | 1<br>1           |
| Rh<br>eu<br>ma<br>toi<br>d<br>Ar<br>thr<br>itis | C<br>00<br>03<br>87<br>3 | MD<br>C1-<br>AS<br>1  | 1.<br>0<br>6<br>E<br>+<br>0<br>8 |            | MDC1<br>antisense<br>RNA 1                                   | 16      | 0<br>.<br>7<br>4<br>3 | 0<br>.<br>3<br>0<br>8           |                                  | 0.<br>1 |  | 1 | 1  | 1 | 20<br>09 | 2<br>0<br>0<br>9 |
| Rh<br>eu<br>ma<br>toi<br>d<br>Ar<br>thr<br>itis | C<br>00<br>03<br>87<br>3 | CE<br>LF<br>2         | 1<br>0<br>6<br>5<br>9            | O953<br>19 | CUGBP Elav-<br>like family<br>member 2                       | 58      | 0<br>.<br>6<br>2<br>8 | 0<br>.<br>6<br>9<br>2<br>6<br>5 | 0.<br>9<br>9<br>6<br>5           | 0.<br>1 |  | 1 | 1  | 1 | 20<br>19 | 2<br>0<br>1<br>9 |
| Rh<br>eu<br>ma<br>toi<br>d<br>Ar<br>thr<br>itis | C<br>00<br>03<br>87<br>3 | TN<br>FS<br>F13<br>B  | 1<br>0<br>6<br>7<br>3            | Q9Y2<br>75 | TNF<br>superfamily<br>member 13b                             | 28<br>2 | 0<br>.<br>4<br>6      | 0<br>.<br>7<br>3<br>1<br>9<br>3 | 0.<br>9<br>8<br>1<br>9<br>3      | 0.<br>1 |  | 1 | 28 | 0 | 20<br>02 | 2<br>0<br>1<br>9 |
| Rh<br>eu<br>ma<br>toi<br>d<br>Ar<br>thr<br>itis | C<br>00<br>03<br>87<br>3 | MT<br>CO<br>2P1<br>2  | 1.<br>0<br>7<br>E<br>+<br>0<br>8 |            | MT-CO2<br>pseudogene 12                                      | 70<br>3 | 0<br>.<br>3<br>6<br>8 | 0<br>.<br>9<br>6<br>2           |                                  | 0.<br>1 |  | 1 | 25 | 0 | 19<br>94 | 2<br>0<br>1<br>9 |
| Rh<br>eu<br>ma<br>toi<br>d<br>Ar<br>thr<br>itis | C<br>00<br>03<br>87<br>3 | PH<br>TF<br>1         | 1<br>0<br>7<br>4<br>5            | Q9U<br>MS5 | putative<br>homeod<br>omain<br>transcrip<br>tion<br>factor 1 | 2       | 0<br>.<br>9<br>3<br>1 | 0<br>.<br>1<br>9<br>2           | 9.<br>6<br>9<br>E<br>-<br>2<br>6 | 0.<br>1 |  | 1 | 1  | 3 | 20<br>09 | 2<br>0<br>0<br>9 |
| Rh<br>eu<br>ma<br>toi<br>d<br>Ar<br>thr<br>itis | C<br>00<br>03<br>87<br>3 | LI<br>NC<br>021<br>96 | 1.<br>0<br>8<br>E<br>+<br>0<br>8 |            | long<br>intergenic<br>non-protein<br>coding RNA<br>2196      | 3       | 0<br>.<br>9<br>3<br>1 | 0<br>.<br>2<br>3<br>1           |                                  | 0.<br>1 |  | 1 | 1  | 2 | 20<br>13 | 2<br>0<br>1<br>3 |

|                      |          |         |        |         |                                                |                      |     |       |       |          |     |  |       |    |   |      |      |
|----------------------|----------|---------|--------|---------|------------------------------------------------|----------------------|-----|-------|-------|----------|-----|--|-------|----|---|------|------|
| Rheumatoid Arthritis | C0003873 | HC P5   | 10866  | Q6M ZN7 | HLA complex P5                                 |                      | 79  | 0.595 | 0.808 |          | 0.1 |  | 1     | 2  | 5 | 2007 | 2009 |
| Rheumatoid Arthritis | C0003873 | PA POLA | 10914  | P51003  | poly(A) polymerase alpha                       | Nucleic acid binding | 79  | 0.593 | 0.731 | 0.9998   | 0.1 |  | 1     | 1  | 1 | 2009 | 2009 |
| Rheumatoid Arthritis | C0003873 | EH MT2  | 10919  | Q96K Q7 | euchromatic histone lysine methyltransferase 2 | Epigenetic regulator | 86  | 0.59  | 0.808 | 0.0013   | 0.1 |  | 1     | 3  | 6 | 2007 | 2011 |
| Rheumatoid Arthritis | C0003873 | OS9     | 10956  | Q13438  | OS9 endoplasmic reticulum lectin               |                      | 5   | 0.931 | 0.154 | 2.86E-09 | 0.1 |  | 1     | 3  | 2 | 2014 | 2019 |
| Rheumatoid Arthritis | C0003873 | HT D2   | 11E+08 | P86397  | hydroxyacyl-thioester dehydratase type 2       |                      | 2   | 1     | 0.15  |          | 0.1 |  | 1     | 3  | 1 | 2014 | 2019 |
| Rheumatoid Arthritis | C0003873 | TRI M31 | 11074  | Q9BZ Y9 | tripartite motif containing 31                 |                      | 61  | 0.626 | 0.577 | 4.32E-06 | 0.1 |  | 1     | 2  | 4 | 2007 | 2009 |
| Rheumatoid Ar        | C0003873 | CHI3L1  | 1116   | P36222  | chitinase like 1 3                             |                      | 420 | 0.419 | 0.885 | 1.11E-   | 0.1 |  | 0.944 | 18 | 1 | 1993 | 2019 |



|                                                 |                          |                     |                                  |            |                                                       |                      |         |                       |                                      |                                  |         |   |                   |    |          |                  |                  |
|-------------------------------------------------|--------------------------|---------------------|----------------------------------|------------|-------------------------------------------------------|----------------------|---------|-----------------------|--------------------------------------|----------------------------------|---------|---|-------------------|----|----------|------------------|------------------|
| thr<br>itis                                     |                          |                     |                                  |            |                                                       |                      |         |                       |                                      | 0<br>5                           |         |   |                   |    |          |                  |                  |
| Rh<br>eu<br>ma<br>toi<br>d<br>Ar<br>thr<br>itis | C<br>00<br>03<br>87<br>3 | FA<br>M1<br>07<br>A | 1<br>1<br>1<br>7<br>0            | O959<br>90 | family with<br>sequence<br>similarity 107<br>member A |                      | 36      | 0<br>.<br>6<br>7<br>4 | 0<br>.<br>4<br>6<br>2                | 8.<br>2<br>8<br>E<br>-<br>0<br>7 | 0.<br>1 |   | 1                 | 3  | 1        | 20<br>10         | 2<br>0<br>1<br>2 |
| Rh<br>eu<br>ma<br>toi<br>d<br>Ar<br>thr<br>itis | C<br>00<br>03<br>87<br>3 | NR<br>M             | 1<br>1<br>2<br>7<br>0            | Q8IX<br>M6 | nurim                                                 |                      | 16      | 0<br>.<br>7<br>6      | 0<br>.<br>2<br>3<br>1                | 0.<br>0<br>2<br>1<br>8<br>2<br>8 | 0.<br>1 |   | 1                 | 1  | 1        | 20<br>07         | 2<br>0<br>0<br>7 |
| Rh<br>eu<br>ma<br>toi<br>d<br>Ar<br>thr<br>itis | C<br>00<br>03<br>87<br>3 | IL1<br>7F           | 1<br>1<br>2<br>7<br>4<br>4       | Q96P<br>D4 | interleukin<br>17F                                    |                      | 23<br>6 | 0<br>.<br>4<br>8      | 0<br>.<br>8<br>0<br>8                | 0.<br>0<br>3<br>9<br>1<br>6<br>5 | 0.<br>1 |   | 0.<br>8<br>6<br>7 | 15 | 2        | 20<br>09         | 2<br>0<br>2<br>0 |
| Rh<br>eu<br>ma<br>toi<br>d<br>Ar<br>thr<br>itis | C<br>00<br>03<br>87<br>3 | SM<br>IM<br>40      | 1.<br>1<br>4<br>E<br>+<br>0<br>8 | Q5ST<br>R5 | small integral<br>membrane<br>protein 40              |                      | 1       | 1                     | 0<br>.<br>1<br>1<br>5                |                                  | 0.<br>1 |   | 1                 | 1  | 2        | 20<br>11         | 2<br>0<br>1<br>1 |
| Rh<br>eu<br>ma<br>toi<br>d<br>Ar<br>thr<br>itis | C<br>00<br>03<br>87<br>3 | NL<br>RP<br>3       | 1<br>1<br>4<br>5<br>4<br>8       | Q96P<br>20 | NLR family<br>pyrin domain<br>containing 3            |                      | 80<br>5 | 0<br>.<br>3<br>6<br>1 | 0<br>.<br>9<br>6<br>2                | 0.<br>0<br>0<br>8<br>1<br>1      | 0.<br>1 |   | 0.<br>8<br>7      | 23 | 2        | 20<br>04         | 2<br>0<br>2<br>0 |
| Rh<br>eu<br>ma<br>toi<br>d<br>Ar<br>thr<br>itis | C<br>00<br>03<br>87<br>3 | CS<br>MD<br>3       | 1<br>1<br>4<br>7<br>8<br>8       | Q7Z4<br>07 | CUB and<br>Sushi multiple<br>domains 3                |                      | 31      | 0<br>.<br>6<br>9<br>5 | 0<br>.<br>5<br>5<br>7<br>1<br>0<br>5 | 0.<br>0<br>1                     |         | 1 | 1                 | 1  | 20<br>18 | 2<br>0<br>1<br>8 |                  |
| Rh<br>eu<br>ma<br>toi                           | C<br>00<br>03            | PH<br>AC<br>TR<br>3 | 1<br>1<br>6<br>1                 | Q96K<br>R7 | phospha<br>tase and<br>actin                          | En<br>zy<br>me<br>mo | 6       | 0<br>.<br>8           | 0<br>.<br>2                          | 0.<br>9<br>9<br>6                | 0.<br>1 |   | 1                 | 3  | 2        | 20<br>07         | 2<br>0<br>1<br>9 |

|                                                 |                          |                |                            |            |                                                                             |                                                              |         |                       |                       |                                  |         |  |                   |    |   |          |                  |
|-------------------------------------------------|--------------------------|----------------|----------------------------|------------|-----------------------------------------------------------------------------|--------------------------------------------------------------|---------|-----------------------|-----------------------|----------------------------------|---------|--|-------------------|----|---|----------|------------------|
| d<br>Ar<br>thr<br>itis                          | 87<br>3                  |                | 5<br>4                     |            | regulato<br>r 3                                                             | dul<br>ato<br>r                                              |         | 6<br>1                | 3<br>1                | 8<br>7                           |         |  |                   |    |   |          |                  |
| Rh<br>eu<br>ma<br>toi<br>d<br>Ar<br>thr<br>itis | C<br>00<br>03<br>87<br>3 | RP<br>L3<br>P2 | 1<br>1<br>6<br>9<br>3<br>5 |            | ribosomal<br>protein L3<br>pseudogene 2                                     |                                                              | 1       | 1                     | 0<br>.<br>1<br>1<br>5 |                                  | 0.<br>1 |  | 1                 | 1  | 2 | 20<br>11 | 2<br>0<br>1<br>1 |
| Rh<br>eu<br>ma<br>toi<br>d<br>Ar<br>thr<br>itis | C<br>00<br>03<br>87<br>3 | IP6<br>K3      | 1<br>1<br>7<br>2<br>8<br>3 | Q96P<br>C2 | inositol<br>hexakisphosphate<br>kinase 3                                    | Ki<br>nas<br>e                                               | 10      | 0<br>.<br>8<br>3<br>9 | 0<br>.<br>2<br>3<br>1 | 3.<br>0<br>9<br>E<br>-<br>0<br>7 | 0.<br>1 |  | 1                 | 3  | 8 | 20<br>07 | 2<br>0<br>1<br>1 |
| Rh<br>eu<br>ma<br>toi<br>d<br>Ar<br>thr<br>itis | C<br>00<br>03<br>87<br>3 | CLI<br>C1      | 1<br>1<br>9<br>2           | O002<br>99 | chloride<br>intracell<br>ular<br>channel<br>1                               | Ion<br>ch<br>an<br>nel                                       | 74      | 0<br>.<br>6<br>0<br>1 | 0<br>.<br>5           | 0.<br>0<br>0<br>1<br>9<br>3      | 0.<br>1 |  | 1                 | 1  | 2 | 20<br>11 | 2<br>0<br>1<br>1 |
| Rh<br>eu<br>ma<br>toi<br>d<br>Ar<br>thr<br>itis | C<br>00<br>03<br>87<br>3 | CC<br>R5       | 1<br>2<br>3<br>4           | P5168<br>1 | C-C<br>motif<br>chemoki<br>ne<br>receptor<br>5<br>(gene/ps<br>eudogen<br>e) | G-<br>pro<br>tei<br>n<br>co<br>upl<br>ed<br>rec<br>ept<br>or | 50<br>8 | 0<br>.<br>3<br>9<br>8 | 0<br>.<br>8<br>8<br>5 | 4.<br>3<br>1<br>E<br>-<br>1<br>0 | 0.<br>1 |  | 0.<br>9<br>6<br>7 | 30 | 0 | 19<br>98 | 2<br>0<br>1<br>9 |
| Rh<br>eu<br>ma<br>toi<br>d<br>Ar<br>thr<br>itis | C<br>00<br>03<br>87<br>3 | ZP<br>BP<br>2  | 1<br>2<br>4<br>6<br>2<br>6 | Q6X7<br>84 | zona pellucida<br>binding<br>protein 2                                      |                                                              | 20      | 0<br>.<br>7<br>2<br>9 | 0<br>.<br>3<br>0<br>8 | 1.<br>2<br>2<br>E<br>-<br>0<br>8 | 0.<br>1 |  | 1                 | 1  | 1 | 20<br>19 | 2<br>0<br>1<br>9 |
| Rh<br>eu<br>ma<br>toi<br>d<br>Ar<br>thr<br>itis | C<br>00<br>03<br>87<br>3 | RA<br>VE<br>R1 | 1<br>2<br>5<br>9<br>5<br>0 | Q8IY<br>67 | ribonucl<br>eoprotei<br>n, PTB<br>binding<br>1                              | Nu<br>cle<br>ic<br>aci<br>d<br>bin<br>din<br>g               | 9       | 0<br>.<br>8<br>0<br>5 | 0<br>.<br>2<br>3<br>1 | 0.<br>9<br>1<br>0<br>1           | 0.<br>1 |  | 1                 | 1  | 1 | 20<br>12 | 2<br>0<br>1<br>2 |

|                      |          |        |        |        |                                                       |                    |     |       |       |          |     |  |      |     |   |      |      |
|----------------------|----------|--------|--------|--------|-------------------------------------------------------|--------------------|-----|-------|-------|----------|-----|--|------|-----|---|------|------|
| Rheumatoid Arthritis | C0003873 | CNTR   | 1271   | P26992 | ciliary neurotrophic factor receptor                  | Signal ing         | 19  | 0.722 | 0.385 | 0.9549   | 0.1 |  | 1    | 1   | 1 | 2009 | 2009 |
| Rheumatoid Arthritis | C0003873 | RB M45 | 129831 | Q8IUH3 | RNA binding motif protein 45                          |                    | 557 | 0.383 | 0.846 | 2.11E-10 | 0.1 |  | 0.89 | 200 | 1 | 1989 | 2019 |
| Rheumatoid Arthritis | C0003873 | FLAC1  | 130540 | Q96Q35 | flagellum associated containing coiled-coil domains 1 |                    | 18  | 0.729 | 0.269 | 1.31E-22 | 0.1 |  | 1    | 2   | 2 | 2014 | 2019 |
| Rheumatoid Arthritis | C0003873 | TRIM40 | 135644 | Q6P9F5 | tripartite motif containing 40                        |                    | 6   | 0.89  | 0.192 | 6.17E-11 | 0.1 |  | 1    | 2   | 3 | 2007 | 2009 |
| Rheumatoid Arthritis | C0003873 | MUCL3  | 135656 | Q3MIW9 | mucin like 3                                          |                    | 32  | 0.691 | 0.731 | 1.23E-05 | 0.1 |  | 1    | 2   | 3 | 2007 | 2009 |
| Rheumatoid Arthritis | C0003873 | SGCZ   | 137868 | Q96LD1 | sarcogly can zeta                                     | Cellular structure | 22  | 0.751 | 0.385 | 6.4E-09  | 0.1 |  | 1    | 1   | 1 | 2019 | 2019 |
| Rheumatoid Ar        | C0003873 | ATF6B  | 1388   | Q99941 | activating transcription factor 6 beta                |                    | 14  | 0.839 | 0.192 | 3.1E-07  | 0.1 |  | 1    | 3   | 2 | 2007 | 2011 |

|                      |          |        |        |         |                                                                       |           |     |      |         |          |     |  |       |     |   |      |      |
|----------------------|----------|--------|--------|---------|-----------------------------------------------------------------------|-----------|-----|------|---------|----------|-----|--|-------|-----|---|------|------|
| thritis              |          |        |        |         |                                                                       |           |     |      |         |          |     |  |       |     |   |      |      |
| Rheumatoid Arthritis | C0003873 | CRH    | 1392   | P06850  | corticotropin releasing hormone                                       | Signaling | 402 | 0439 | 0808    | 0.71614  | 0.1 |  | 0.923 | 13  | 0 | 1993 | 2012 |
| Rheumatoid Arthritis | C0003873 | CRK    | 1398   | P46108  | CRK proto-oncogene, adaptor protein                                   |           | 544 | 0394 | 0923    | 0.95936  | 0.1 |  | 1     | 23  | 0 | 2003 | 2019 |
| Rheumatoid Arthritis | C0003873 | CRYGD  | 1421   | P07320  | crystallin gamma D                                                    |           | 168 | 051  | 0800303 | 0.003    | 0.1 |  | 0.927 | 123 | 0 | 2005 | 2020 |
| Rheumatoid Arthritis | C0003873 | ASB15  | 142685 | Q8W XK1 | ankyrin repeat and SOCS box containing 15                             |           | 9   | 0792 | 0231    | 1.84E-15 | 0.1 |  | 1     | 1   | 1 | 2009 | 2009 |
| Rheumatoid Arthritis | C0003873 | MAPK14 | 1432   | Q16539  | mitogen-activated protein kinase 14                                   | Kinase    | 626 | 0379 | 0923    | 0.37466  | 0.1 |  | 1     | 30  | 0 | 2000 | 2019 |
| Rheumatoid Arthritis | C0003873 | DRAC   | 145837 |         | downregulated RNA in cancer, inhibitor of cell invasion and migration |           | 21  | 0736 | 0423    |          | 0.1 |  | 1     | 4   | 1 | 2012 | 2019 |
| Rheumatoid           | C0003    | CSNK2B | 1460   | P67870  | casein kinase 2 beta                                                  | Kinase    | 34  | 06   | 05      | 0.917    | 0.1 |  | 1     | 1   | 4 | 2011 | 2011 |

|                                                 |                          |                       |                            |            |                                                         |                                                |         |                       |                       |                                  |         |  |              |    |   |          |                  |
|-------------------------------------------------|--------------------------|-----------------------|----------------------------|------------|---------------------------------------------------------|------------------------------------------------|---------|-----------------------|-----------------------|----------------------------------|---------|--|--------------|----|---|----------|------------------|
| d<br>Ar<br>thr<br>itis                          | 87<br>3                  |                       |                            |            |                                                         |                                                |         | 8<br>6                | 3<br>8                | 2<br>8                           |         |  |              |    |   |          |                  |
| Rh<br>eu<br>ma<br>toi<br>d<br>Ar<br>thr<br>itis | C<br>00<br>03<br>87<br>3 | IL3<br>4              | 1<br>4<br>6<br>4<br>3<br>3 | Q6Z<br>MJ4 | interleukin 34                                          |                                                | 10<br>3 | 0<br>.<br>5<br>6      | 0<br>.<br>7<br>6<br>9 | 0.<br>5<br>5<br>4<br>4           | 0.<br>1 |  | 1            | 15 | 0 | 20<br>12 | 2<br>0<br>2<br>0 |
| Rh<br>eu<br>ma<br>toi<br>d<br>Ar<br>thr<br>itis | C<br>00<br>03<br>87<br>3 | CS<br>TF<br>3         | 1<br>4<br>7<br>9           | Q129<br>96 | cleavage<br>stimulati<br>on factor<br>subunit<br>3      | Nu<br>cle<br>ic<br>aci<br>d<br>bin<br>din<br>g | 6       | 0<br>.<br>8<br>9      | 0<br>.<br>1<br>5<br>4 | 0.<br>9<br>8<br>2<br>7<br>9      | 0.<br>1 |  | 1            | 1  | 1 | 20<br>13 | 2<br>0<br>1<br>3 |
| Rh<br>eu<br>ma<br>toi<br>d<br>Ar<br>thr<br>itis | C<br>00<br>03<br>87<br>3 | IL2<br>3R             | 1<br>4<br>9<br>2<br>3<br>3 | Q5V<br>WK5 | interleuk<br>in 23<br>receptor                          | Sig<br>nal<br>ing                              | 30<br>6 | 0<br>.<br>4<br>6<br>6 | 0<br>.<br>7<br>6<br>9 | 0.<br>0<br>0<br>0<br>5<br>6      | 0.<br>1 |  | 0.<br>7<br>5 | 20 | 8 | 20<br>07 | 2<br>0<br>2<br>0 |
| Rh<br>eu<br>ma<br>toi<br>d<br>Ar<br>thr<br>itis | C<br>00<br>03<br>87<br>3 | LI<br>NC<br>011<br>04 | 1<br>5<br>0<br>5<br>7<br>7 |            | long<br>intergenic<br>non-protein<br>coding RNA<br>1104 |                                                | 9       | 0<br>.<br>8<br>0<br>5 | 0<br>.<br>1<br>1<br>5 |                                  | 0.<br>1 |  | 1            | 2  | 2 | 20<br>14 | 2<br>0<br>1<br>9 |
| Rh<br>eu<br>ma<br>toi<br>d<br>Ar<br>thr<br>itis | C<br>00<br>03<br>87<br>3 | ZN<br>F59<br>5        | 1<br>5<br>2<br>6<br>8<br>7 | Q8IY<br>B9 | zinc finger<br>protein 595                              |                                                | 1       | 1                     | 0<br>.<br>1<br>1<br>5 | 0.<br>3<br>0<br>5<br>5           | 0.<br>1 |  | 1            | 1  | 1 | 20<br>18 | 2<br>0<br>1<br>8 |
| Rh<br>eu<br>ma<br>toi<br>d<br>Ar<br>thr<br>itis | C<br>00<br>03<br>87<br>3 | ERI<br>CH<br>1        | 1<br>5<br>7<br>6<br>9<br>7 | Q86X<br>53 | glutamate rich<br>1                                     |                                                | 2       | 0<br>.<br>9<br>3<br>1 | 0<br>.<br>1<br>9<br>2 | 1.<br>1<br>4<br>E<br>-<br>1<br>4 | 0.<br>1 |  | 1            | 1  | 1 | 20<br>19 | 2<br>0<br>1<br>9 |

|                      |          |         |        |        |                                                             |          |      |       |        |          |     |  |   |    |    |      |      |
|----------------------|----------|---------|--------|--------|-------------------------------------------------------------|----------|------|-------|--------|----------|-----|--|---|----|----|------|------|
| Rheumatoid Arthritis | C0003873 | CYP21A2 | 1589   | P08686 | cytochrome P450 family 21 subfamily A member 2              |          | 166  | 0.525 | 0.769  | 0.0026   | 0.1 |  | 1 | 3  | 46 | 2007 | 2011 |
| Rheumatoid Arthritis | C0003873 | DGKQ    | 1609   | P52824 | diacylglycerol kinase theta                                 | Kinase   | 17   | 0.736 | 0.743  | 1.76E-09 | 0.1 |  | 1 | 1  | 1  | 2019 | 2019 |
| Rheumatoid Arthritis | C0003873 | MDGA2   | 161357 | Q7Z553 | MAM domain containing glycosylphosphatidylinositol anchor 2 |          | 24   | 0.766 | 0.738  | 0.6457   | 0.1 |  | 1 | 1  | 1  | 2013 | 2013 |
| Rheumatoid Arthritis | C0003873 | ZNFX09  | 168417 | Q8IYX0 | zinc finger protein 679                                     |          | 1    | 1     | 0.1157 | 0.11547  | 0.1 |  | 1 | 1  | 1  | 2019 | 2019 |
| Rheumatoid Arthritis | C0003873 | CLYBL   | 171425 | Q8N0X4 | citrate lyase beta like                                     |          | 18   | 0.743 | 0.75   | 1.64E-09 | 0.1 |  | 1 | 1  | 1  | 2015 | 2015 |
| Rheumatoid Arthritis | C0003873 | DLG2    | 1740   | Q15700 | discs large MAGUK scaffold protein 2                        | Receptor | 44   | 0.677 | 0.779  | 0.7096   | 0.1 |  | 1 | 1  | 1  | 2018 | 2018 |
| Rheumatoid Ar        | C0003873 | EGFR    | 1956   | P00533 | epidermal growth factor receptor                            | Kinase   | 1394 | 0.295 | 0.885  | 0.36837  | 0.1 |  | 1 | 10 | 3  | 2005 | 2018 |

|                      |          |              |        |        |                                    |                  |      |       |       |         |     |  |       |    |   |      |      |
|----------------------|----------|--------------|--------|--------|------------------------------------|------------------|------|-------|-------|---------|-----|--|-------|----|---|------|------|
| thritis              |          |              |        |        |                                    |                  |      |       |       |         |     |  |       |    |   |      |      |
| Rheumatoid Arthritis | C0003873 | C3orf67      | 200844 | Q6ZVT6 | chromosome 3 open reading frame 67 | Enzyme           | 3    | 0.89  | 0.192 | 9.4E-11 | 0.1 |  | 1     | 1  | 1 | 2019 | 2019 |
| Rheumatoid Arthritis | C0003873 | TRIM39-RPP21 | 202658 |        | TRIM39-RPP21 readthrough           |                  | 6    | 0.821 | 0.269 | 0.7425  | 0.1 |  | 1     | 1  | 1 | 2009 | 2009 |
| Rheumatoid Arthritis | C0003873 | EPHB2        | 2048   | P29323 | EPH receptor B2                    | Kinase           | 649  | 0.374 | 0.846 | 0.9997  | 0.1 |  | 0.923 | 13 | 0 | 2007 | 2020 |
| Rheumatoid Arthritis | C0003873 | AKT1         | 207    | P31749 | AKT serine/threonine kinase 1      | Kinase           | 1250 | 0.311 | 0.962 | 0.9759  | 0.1 |  | 0.938 | 16 | 0 | 2007 | 2019 |
| Rheumatoid Arthritis | C0003873 | ESR1         | 2099   | P03372 | estrogen receptor 1                | Nuclear receptor | 1101 | 0.324 | 0.962 | 0.992   | 0.1 |  | 0.977 | 44 | 0 | 2000 | 2020 |
| Rheumatoid Arthritis | C0003873 | ALB          | 213    | P02768 | albumin                            | Transporter      | 1198 | 0.317 | 0.962 | 0.64329 | 0.1 |  | 0.95  | 20 | 0 | 1996 | 2020 |
| Rheumatoid           | C0003873 | FCGR3A       | 2214   | P08637 | Fc fragment of IgG                 | Cell ad          | 352  | 0.4   | 0.9   | 3.7E-   | 0.1 |  | 0.909 | 33 | 3 | 1990 | 2019 |

|                                                 |                          |                |                            |            |                                                        |                              |         |                       |                       |                                  |         |  |                   |    |   |          |                  |
|-------------------------------------------------|--------------------------|----------------|----------------------------|------------|--------------------------------------------------------|------------------------------|---------|-----------------------|-----------------------|----------------------------------|---------|--|-------------------|----|---|----------|------------------|
| d<br>Ar<br>thr<br>itis                          | 87<br>3                  |                |                            |            | receptor<br>IIIa                                       | hes<br>ion                   |         | 3<br>2                | 6<br>2                | 0<br>6                           |         |  |                   |    |   |          |                  |
| Rh<br>eu<br>ma<br>toi<br>d<br>Ar<br>thr<br>itis | C<br>00<br>03<br>87<br>3 | FC<br>GR<br>3B | 2<br>2<br>1<br>5           | O750<br>15 | Fc<br>fragmen<br>t of IgG<br>receptor<br>IIIb          | Ce<br>ll<br>ad<br>hes<br>ion | 29<br>1 | 0<br>.<br>4<br>5<br>2 | 0<br>.<br>9<br>6<br>2 | 3.<br>0<br>3<br>E<br>-<br>0<br>7 | 0.<br>1 |  | 0.<br>9<br>2<br>3 | 26 | 2 | 19<br>90 | 2<br>0<br>1<br>9 |
| Rh<br>eu<br>ma<br>toi<br>d<br>Ar<br>thr<br>itis | C<br>00<br>03<br>87<br>3 | JA<br>ZF<br>1  | 2<br>2<br>1<br>8<br>9<br>5 | Q86V<br>Z6 | JAZF<br>finger 1                                       | zinc                         | 10<br>2 | 0<br>.<br>5<br>8<br>2 | 0<br>.<br>6<br>5<br>4 | 0.<br>8<br>9<br>5<br>8<br>2      | 0.<br>1 |  | 1                 | 1  | 1 | 20<br>14 | 2<br>0<br>1<br>4 |
| Rh<br>eu<br>ma<br>toi<br>d<br>Ar<br>thr<br>itis | C<br>00<br>03<br>87<br>3 | NK<br>AP<br>L  | 2<br>2<br>2<br>6<br>9<br>8 | Q5M9<br>Q1 | NFKB<br>activating<br>protein like                     |                              | 4       | 0<br>.<br>8<br>9      | 0<br>.<br>2<br>3<br>1 | 9.<br>2<br>2<br>E<br>-<br>0<br>5 | 0.<br>1 |  | 1                 | 1  | 1 | 20<br>09 | 2<br>0<br>0<br>9 |
| Rh<br>eu<br>ma<br>toi<br>d<br>Ar<br>thr<br>itis | C<br>00<br>03<br>87<br>3 | FG<br>F2       | 2<br>2<br>4<br>7           | P0903<br>8 | fibroblas<br>t growth<br>factor 2                      | Sig<br>nal<br>ing            | 63<br>5 | 0<br>.<br>3<br>8<br>3 | 0<br>.<br>9<br>2<br>3 | 0.<br>0<br>1<br>8<br>4           | 0.<br>1 |  | 1                 | 11 | 0 | 19<br>92 | 2<br>0<br>1<br>8 |
| Rh<br>eu<br>ma<br>toi<br>d<br>Ar<br>thr<br>itis | C<br>00<br>03<br>87<br>3 | GP<br>C5       | 2<br>2<br>6<br>2           | P7833<br>3 | glypican 5                                             |                              | 65      | 0<br>.<br>6<br>2<br>6 | 0<br>.<br>6<br>5<br>4 | 3.<br>9<br>9<br>E<br>-<br>1<br>0 | 0.<br>1 |  | 1                 | 1  | 1 | 20<br>19 | 2<br>0<br>1<br>9 |
| Rh<br>eu<br>ma<br>toi<br>d<br>Ar<br>thr<br>itis | C<br>00<br>03<br>87<br>3 | DK<br>K1       | 2<br>2<br>9<br>4<br>3      | O949<br>07 | dickkopf<br>WNT<br>signaling<br>pathway<br>inhibitor 1 |                              | 37<br>2 | 0<br>.<br>4<br>3<br>9 | 0<br>.<br>8<br>8<br>5 | 0.<br>1<br>7<br>4<br>2<br>3      | 0.<br>1 |  | 1                 | 16 | 0 | 20<br>08 | 2<br>0<br>1<br>9 |



|                      |          |        |       |        |                                           |                      |     |        |        |          |     |  |       |    |   |      |      |
|----------------------|----------|--------|-------|--------|-------------------------------------------|----------------------|-----|--------|--------|----------|-----|--|-------|----|---|------|------|
| Rheumatoid Arthritis | C0003873 | ABCF1  | 23    | Q8NE71 | ATP binding cassette subfamily F member 1 | Enzyme               | 31  | 0.674  | 0.538  | 1.28E-09 | 0.1 |  | 1     | 2  | 1 | 2007 | 2009 |
| Rheumatoid Arthritis | C0003873 | PLCL2  | 23228 | Q9UPR0 | phospholipase C like 2                    | Enzyme               | 30  | 0.743  | 0.308  | 0.9999   | 0.1 |  | 1     | 2  | 1 | 2014 | 2019 |
| Rheumatoid Arthritis | C0003873 | PDSS5A | 23244 | Q29RF7 | PDS5 cohesin associated factor A          | Nucleic acid binding | 16  | 0.792  | 0.346  | 1        | 0.1 |  | 1     | 1  | 2 | 2009 | 2009 |
| Rheumatoid Arthritis | C0003873 | FN1    | 2335  | P02751 | fibronectin 1                             | Signaling            | 724 | 0.365  | 0.962  | 0.0014   | 0.1 |  | 1     | 18 | 0 | 1992 | 2019 |
| Rheumatoid Arthritis | C0003873 | SIRT1  | 23411 | Q96EB6 | sirtuin 1                                 | Epigenetic regulator | 675 | 0.3788 | 0.8873 | 0.00026  | 0.1 |  | 0.938 | 16 | 0 | 2011 | 2020 |
| Rheumatoid Arthritis | C0003873 | TNPO3  | 23534 | Q9Y5L0 | transport in 3                            | Transporter          | 66  | 0.663  | 0.577  | 1.75E-06 | 0.1 |  | 1     | 2  | 4 | 2017 | 2019 |
| Rheumatoid Ar        | C0003873 | SDF2L1 | 23753 | Q9HCN8 | stromal cell derived factor 2 like 1      |                      | 12  | 0.805  | 0.385  | 0.18957  | 0.1 |  | 1     | 1  | 1 | 2019 | 2019 |

|                                                 |                          |                |                            |            |                                                                                |                                                              |         |                       |                       |                                  |         |  |   |    |   |          |                  |
|-------------------------------------------------|--------------------------|----------------|----------------------------|------------|--------------------------------------------------------------------------------|--------------------------------------------------------------|---------|-----------------------|-----------------------|----------------------------------|---------|--|---|----|---|----------|------------------|
| thr<br>itis                                     |                          |                |                            |            |                                                                                |                                                              |         |                       |                       |                                  |         |  |   |    |   |          |                  |
| Rh<br>eu<br>ma<br>toi<br>d<br>Ar<br>thr<br>itis | C<br>00<br>03<br>87<br>3 | IL2<br>7       | 2<br>4<br>6<br>7<br>7<br>8 | Q8NE<br>V9 | interleukin 27                                                                 |                                                              | 28<br>6 | 0<br>.<br>4<br>5<br>7 | 0<br>.<br>8<br>0<br>8 | 0.<br>7<br>8<br>2<br>3<br>2      | 0.<br>1 |  | 1 | 10 | 0 | 20<br>10 | 2<br>0<br>1<br>9 |
| Rh<br>eu<br>ma<br>toi<br>d<br>Ar<br>thr<br>itis | C<br>00<br>03<br>87<br>3 | HC<br>G2<br>7  | 2<br>5<br>3<br>0<br>1<br>8 |            | HLA complex<br>group 27                                                        |                                                              | 14      | 0<br>.<br>8<br>0<br>5 | 0<br>.<br>3<br>4<br>6 | 0.<br>0<br>2<br>3<br>0<br>6<br>3 | 0.<br>1 |  | 1 | 3  | 4 | 20<br>07 | 2<br>0<br>1<br>1 |
| Rh<br>eu<br>ma<br>toi<br>d<br>Ar<br>thr<br>itis | C<br>00<br>03<br>87<br>3 | W<br>DR<br>27  | 2<br>5<br>3<br>7<br>6<br>9 | A2RR<br>H5 | WD repeat<br>domain 27                                                         |                                                              | 4       | 0<br>.<br>9<br>3<br>1 | 0<br>.<br>1<br>9<br>2 | 3.<br>8<br>E<br>-<br>1<br>7      | 0.<br>1 |  | 1 | 1  | 1 | 20<br>16 | 2<br>0<br>1<br>6 |
| Rh<br>eu<br>ma<br>toi<br>d<br>Ar<br>thr<br>itis | C<br>00<br>03<br>87<br>3 | GA<br>BB<br>R1 | 2<br>5<br>5<br>0           | Q9UB<br>S5 | gamma-<br>aminobu<br>tyric<br>acid type<br>B<br>receptor<br>subunit<br>1       | G-<br>pro<br>tei<br>n<br>co<br>upl<br>ed<br>rec<br>ept<br>or | 82      | 0<br>.<br>5<br>8<br>7 | 0<br>.<br>7<br>6<br>9 | 0.<br>9<br>9<br>9<br>1           | 0.<br>1 |  | 1 | 1  | 6 | 20<br>09 | 2<br>0<br>0<br>9 |
| Rh<br>eu<br>ma<br>toi<br>d<br>Ar<br>thr<br>itis | C<br>00<br>03<br>87<br>3 | AS<br>F1<br>A  | 2<br>5<br>8<br>4<br>2      | Q9Y2<br>94 | anti-<br>silencin<br>g<br>function<br>1A<br>histone<br>chapero<br>ne           | Nu<br>cle<br>ic<br>aci<br>d<br>bin<br>din<br>g               | 36      | 0<br>.<br>6<br>7      | 0<br>.<br>6<br>1<br>5 | 0.<br>8<br>0<br>5<br>4<br>2      | 0.<br>1 |  | 1 | 10 | 0 | 20<br>02 | 2<br>0<br>2<br>0 |
| Rh<br>eu<br>ma<br>toi<br>d<br>Ar<br>thr<br>itis | C<br>00<br>03<br>87<br>3 | RN<br>F19<br>A | 2<br>5<br>8<br>9<br>7      | Q9N<br>V58 | ring<br>finger<br>protein<br>19A,<br>RBR E3<br>ubiquiti<br>n protein<br>ligase | En<br>zy<br>me                                               | 52<br>3 | 0<br>.<br>3<br>9<br>7 | 0<br>.<br>9<br>2<br>3 | 0.<br>0<br>2<br>5<br>3<br>0<br>5 | 0.<br>1 |  | 1 | 23 | 0 | 20<br>03 | 2<br>0<br>1<br>9 |

|                      |          |          |        |        |                                                                      |        |     |       |       |          |     |  |     |    |   |      |      |
|----------------------|----------|----------|--------|--------|----------------------------------------------------------------------|--------|-----|-------|-------|----------|-----|--|-----|----|---|------|------|
| Rheumatoid Arthritis | C0003873 | RCHY1    | 25898  | Q96PM5 | ring finger and CHY zinc finger domain containing 1                  | Enzyme | 26  | 0.76  | 0.42  | 0.06203  | 0.1 |  | 1   | 1  | 1 | 2013 | 2013 |
| Rheumatoid Arthritis | C0003873 | LY6G6F   | 259215 | Q5SQ64 | lymphocyte antigen family member G6F                                 | 6      | 5   | 0.861 | 0.308 | 9.56E-07 | 0.1 |  | 1   | 2  | 3 | 2007 | 2009 |
| Rheumatoid Arthritis | C0003873 | MA6I3    | 260425 | Q5TCQ9 | membrane associated guanylate kinase, WW and PDZ domain containing 3 |        | 17  | 0.751 | 0.346 | 0.02978  | 0.1 |  | 1   | 1  | 1 | 2009 | 2009 |
| Rheumatoid Arthritis | C0003873 | PO6LDIP2 | 260733 | Q9Y2S7 | DNA polymerase delta interacting protein 2                           |        | 530 | 0.396 | 0.923 | 0.04407  | 0.1 |  | 1   | 23 | 0 | 2003 | 2019 |
| Rheumatoid Arthritis | C0003873 | FB6XW8   | 26259  | Q8N3Y1 | F-box and WD repeat domain containing 8                              |        | 18  | 0.743 | 0.385 | 5.24E-16 | 0.1 |  | 1   | 1  | 1 | 2019 | 2019 |
| Rheumatoid Arthritis | C0003873 | GC6H1    | 2643   | P30793 | GTP cyclohydrolase 1                                                 | Enzyme | 254 | 0.511 | 0.846 | 0.9022   | 0.1 |  |     | 0  | 0 |      |      |
| Rheumatoid           | C0003873 | GE6M     | 2669   | P55040 | GTP binding protein overexpressed in skeletal muscle                 |        | 251 | 0.467 | 0.769 | 1.18E-1  | 0.1 |  | 0.9 | 10 | 0 | 2006 | 2019 |

|                                                 |                          |               |                            |            |                                                                        |         |                       |                       |                                  |         |  |                   |    |   |          |                  |
|-------------------------------------------------|--------------------------|---------------|----------------------------|------------|------------------------------------------------------------------------|---------|-----------------------|-----------------------|----------------------------------|---------|--|-------------------|----|---|----------|------------------|
| Ar<br>thr<br>itis                               |                          |               |                            |            |                                                                        |         |                       | 0<br>8                |                                  |         |  |                   |    |   |          |                  |
| Rh<br>eu<br>ma<br>toi<br>d<br>Ar<br>thr<br>itis | C<br>00<br>03<br>87<br>3 | HL<br>A-S     | 2<br>6<br>7<br>0<br>1<br>5 |            | major<br>histocompatib<br>ility complex,<br>class I, S<br>(pseudogene) | 2       | 0<br>.<br>9<br>3<br>1 | 0<br>.<br>1<br>9<br>2 |                                  | 0.<br>1 |  | 1                 | 3  | 1 | 20<br>07 | 2<br>0<br>1<br>1 |
| Rh<br>eu<br>ma<br>toi<br>d<br>Ar<br>thr<br>itis | C<br>00<br>03<br>87<br>3 | GF<br>RA<br>1 | 2<br>6<br>7<br>4           | P5615<br>9 | GDNF family<br>receptor alpha<br>1                                     | 73      | 0<br>.<br>6<br>1<br>9 | 0<br>.<br>6<br>1<br>5 | 0.<br>1<br>1<br>7<br>5           | 0.<br>1 |  | 1                 | 1  | 1 | 20<br>16 | 2<br>0<br>1<br>6 |
| Rh<br>eu<br>ma<br>toi<br>d<br>Ar<br>thr<br>itis | C<br>00<br>03<br>87<br>3 | DK<br>K3      | 2<br>7<br>1<br>2<br>2      | Q9UB<br>P4 | dickkopf<br>WNT<br>signaling<br>pathway<br>inhibitor 3                 | 18<br>6 | 0<br>.<br>5           | 0<br>.<br>7<br>3<br>1 | 4.<br>1<br>E<br>-<br>0<br>6      | 0.<br>1 |  | 1                 | 1  | 1 | 20<br>13 | 2<br>0<br>1<br>3 |
| Rh<br>eu<br>ma<br>toi<br>d<br>Ar<br>thr<br>itis | C<br>00<br>03<br>87<br>3 | IL3<br>7      | 2<br>7<br>1<br>7<br>8      | Q9NZ<br>H6 | interleukin 37                                                         | 28<br>0 | 0<br>.<br>4<br>5<br>9 | 0<br>.<br>8<br>4<br>6 | 0.<br>0<br>0<br>0<br>1<br>2<br>3 | 0.<br>1 |  | 1                 | 12 | 1 | 20<br>07 | 2<br>0<br>1<br>9 |
| Rh<br>eu<br>ma<br>toi<br>d<br>Ar<br>thr<br>itis | C<br>00<br>03<br>87<br>3 | IL1<br>7B     | 2<br>7<br>1<br>9<br>0      | Q9U<br>HF5 | interleukin<br>17B                                                     | 11<br>6 | 0<br>.<br>5<br>5<br>3 | 0<br>.<br>7<br>6<br>9 | 0.<br>0<br>3<br>3<br>6<br>3<br>1 | 0.<br>1 |  | 0.<br>9<br>2<br>3 | 13 | 0 | 20<br>06 | 2<br>0<br>1<br>9 |
| Rh<br>eu<br>ma<br>toi<br>d<br>Ar<br>thr<br>itis | C<br>00<br>03<br>87<br>3 | HP<br>GD<br>S | 2<br>7<br>3<br>0<br>6      | O607<br>60 | hematopoietic<br>prostaglandin<br>D synthase                           | 57<br>0 | 0<br>.<br>3<br>8<br>8 | 0<br>.<br>9<br>2<br>3 | 1.<br>8<br>1<br>E<br>-<br>0<br>6 | 0.<br>1 |  | 1                 | 10 | 0 | 19<br>99 | 2<br>0<br>1<br>9 |
| Rh<br>eu<br>ma                                  | C<br>00<br>03            | GN<br>L1      | 2<br>7                     | P3691<br>5 | G protein<br>nucleolar 1<br>(putative)                                 | 11      | 0<br>.<br>8           | 0<br>.<br>4           | 0.<br>9<br>9                     | 0.<br>1 |  | 1                 | 2  | 1 | 20<br>07 | 2<br>0           |

|                                                 |                          |                       |                            |            |                                                        |                                                              |         |                       |                       |                                  |         |  |   |    |   |          |                  |
|-------------------------------------------------|--------------------------|-----------------------|----------------------------|------------|--------------------------------------------------------|--------------------------------------------------------------|---------|-----------------------|-----------------------|----------------------------------|---------|--|---|----|---|----------|------------------|
| to<br>id<br>Ar<br>thr<br>itis                   | 87<br>3                  |                       | 9<br>4                     |            |                                                        |                                                              |         | 0<br>5                | 2<br>3                | 9<br>2<br>8                      |         |  |   |    |   | 0<br>9   |                  |
| Rh<br>eu<br>ma<br>toi<br>d<br>Ar<br>thr<br>itis | C<br>00<br>03<br>87<br>3 | GPI                   | 2<br>8<br>2<br>1           | P0674<br>4 | glucose-<br>6-<br>phospha<br>te<br>isomeras<br>e       | En<br>zy<br>me                                               | 21<br>8 | 0<br>.<br>4<br>9<br>1 | 0<br>.<br>7<br>6<br>9 | 2.<br>8<br>4<br>E<br>-<br>0<br>6 | 0.<br>1 |  | 1 | 16 | 0 | 20<br>02 | 2<br>0<br>2<br>0 |
| Rh<br>eu<br>ma<br>toi<br>d<br>Ar<br>thr<br>itis | C<br>00<br>03<br>87<br>3 | LI<br>NC<br>002<br>94 | 2<br>8<br>3<br>2<br>6<br>7 |            | long<br>intergenic<br>non-protein<br>coding RNA<br>294 |                                                              | 1       | 1                     | 0<br>.<br>1<br>1<br>5 |                                  | 0.<br>1 |  | 1 | 1  | 1 | 20<br>13 | 2<br>0<br>1<br>3 |
| Rh<br>eu<br>ma<br>toi<br>d<br>Ar<br>thr<br>itis | C<br>00<br>03<br>87<br>3 | CX<br>CR<br>3         | 2<br>8<br>3<br>3           | P4968<br>2 | C-X-C<br>motif<br>chemoki<br>ne<br>receptor<br>3       | G-<br>pro<br>tei<br>n<br>co<br>upl<br>ed<br>rec<br>ept<br>or | 36<br>7 | 0<br>.<br>4<br>3<br>6 | 0<br>.<br>8<br>0<br>8 | 0.<br>1<br>1                     | 0.<br>1 |  | 1 | 11 | 0 | 20<br>01 | 2<br>0<br>1<br>8 |
| Rh<br>eu<br>ma<br>toi<br>d<br>Ar<br>thr<br>itis | C<br>00<br>03<br>87<br>3 | HE<br>CT<br>D4        | 2<br>8<br>3<br>4<br>5<br>0 | Q9Y4<br>D8 | HECT domain<br>E3 ubiquitin<br>protein ligase<br>4     |                                                              | 55      | 0<br>.<br>7           | 0<br>.<br>4<br>6<br>2 | 1                                | 0.<br>1 |  | 1 | 1  | 1 | 20<br>16 | 2<br>0<br>1<br>6 |
| Rh<br>eu<br>ma<br>toi<br>d<br>Ar<br>thr<br>itis | C<br>00<br>03<br>87<br>3 | TM<br>EM<br>235       | 2<br>8<br>3<br>9<br>9<br>9 | A6NF<br>C5 | transmembran<br>e protein 235                          |                                                              | 1       | 1                     | 0<br>.<br>1<br>1<br>5 | 0.<br>0<br>0<br>4<br>5<br>8      | 0.<br>1 |  | 1 | 1  | 1 | 20<br>19 | 2<br>0<br>1<br>9 |
| Rh<br>eu<br>ma<br>toi<br>d<br>Ar                | C<br>00<br>03<br>87<br>3 | HC<br>G2<br>2         | 2<br>8<br>5<br>8<br>3<br>4 | E2RY<br>F7 | HLA complex<br>group 22<br>(gene/pseudog<br>ene)       |                                                              | 20      | 0<br>.<br>7<br>3<br>6 | 0<br>.<br>4<br>2<br>3 |                                  | 0.<br>1 |  | 1 | 2  | 2 | 20<br>07 | 2<br>0<br>0<br>9 |

|                                                 |                          |                      |                  |            |                                                                                    |                                             |          |                       |                       |                                  |         |  |         |    |   |          |                  |
|-------------------------------------------------|--------------------------|----------------------|------------------|------------|------------------------------------------------------------------------------------|---------------------------------------------|----------|-----------------------|-----------------------|----------------------------------|---------|--|---------|----|---|----------|------------------|
| thr<br>itis                                     |                          |                      |                  |            |                                                                                    |                                             |          |                       |                       |                                  |         |  |         |    |   |          |                  |
| Rh<br>eu<br>ma<br>toi<br>d<br>Ar<br>thr<br>itis | C<br>00<br>03<br>87<br>3 | GS<br>TM<br>1        | 2<br>9<br>4<br>4 | P0948<br>8 | glutathione S-<br>transferase mu<br>1                                              |                                             | 62<br>7  | 0<br>.<br>3<br>8      | 0<br>.<br>9<br>2<br>3 | 0.<br>0<br>0<br>2<br>0<br>6<br>4 | 0.<br>1 |  | 0.<br>8 | 15 | 0 | 19<br>99 | 2<br>0<br>1<br>9 |
| Rh<br>eu<br>ma<br>toi<br>d<br>Ar<br>thr<br>itis | C<br>00<br>03<br>87<br>3 | GS<br>TT<br>1        | 2<br>9<br>5<br>2 | P3071<br>1 | glutathione S-<br>transferase<br>theta 1                                           |                                             | 54<br>1  | 0<br>.<br>3<br>9<br>3 | 0<br>.<br>9<br>2<br>3 | 0.<br>0<br>0<br>1<br>4<br>8      | 0.<br>1 |  | 0.<br>9 | 10 | 0 | 19<br>99 | 2<br>0<br>1<br>9 |
| Rh<br>eu<br>ma<br>toi<br>d<br>Ar<br>thr<br>itis | C<br>00<br>03<br>87<br>3 | GU<br>CY<br>1B<br>2  | 2<br>9<br>7<br>4 | O753<br>43 | guanylate<br>cyclase 1<br>soluble<br>subunit beta 2<br>(pseudogene)                |                                             | 2        | 1                     | 0<br>.<br>1<br>1<br>5 |                                  | 0.<br>1 |  | 1       | 1  | 1 | 20<br>15 | 2<br>0<br>1<br>5 |
| Rh<br>eu<br>ma<br>toi<br>d<br>Ar<br>thr<br>itis | C<br>00<br>03<br>87<br>3 | HIF<br>1A            | 3<br>0<br>9<br>1 | Q166<br>65 | hypoxia<br>inducibl<br>e factor<br>1<br>subunit<br>alpha                           | Tr<br>ans<br>cri<br>pti<br>on<br>fac<br>tor | 10<br>44 | 0<br>.<br>3<br>2<br>7 | 0<br>.<br>9<br>2<br>3 | 0.<br>9<br>7<br>7                | 0.<br>1 |  | 1       | 19 | 0 | 20<br>03 | 2<br>0<br>2<br>0 |
| Rh<br>eu<br>ma<br>toi<br>d<br>Ar<br>thr<br>itis | C<br>00<br>03<br>87<br>3 | HL<br>A-<br>DO<br>B  | 3<br>1<br>1<br>2 | P1376<br>5 | major histoco<br>mpatibil<br>ity<br>complex<br>, class II,<br>DO beta              | Im<br>mu<br>ne<br>res<br>po<br>nse          | 24       | 0<br>.<br>7<br>0<br>5 | 0<br>.<br>5           | 1.<br>9<br>2<br>E<br>-<br>0<br>6 | 0.<br>1 |  | 1       | 4  | 8 | 20<br>07 | 2<br>0<br>1<br>6 |
| Rh<br>eu<br>ma<br>toi<br>d<br>Ar<br>thr<br>itis | C<br>00<br>03<br>87<br>3 | HL<br>A-<br>DP<br>B2 | 3<br>1<br>1<br>6 |            | major<br>histocompatib<br>ility complex,<br>class II, DP<br>beta 2<br>(pseudogene) |                                             | 15       | 0<br>.<br>7<br>4<br>3 | 0<br>.<br>5           |                                  | 0.<br>1 |  | 1       | 1  | 1 | 20<br>09 | 2<br>0<br>0<br>9 |
| Rh<br>eu<br>ma<br>toi                           | C<br>00<br>03            | HL<br>A-<br>DQ<br>B2 | 3<br>1<br>2<br>0 | P0553<br>8 | major histoco<br>mpatibil<br>ity                                                   | Im<br>mu<br>ne<br>res                       | 91       | 0<br>.<br>5           | 0<br>.<br>7           | 0.<br>0<br>4<br>2                | 0.<br>1 |  | 1       | 3  | 3 | 20<br>07 | 2<br>0<br>1<br>1 |

|                                                 |                          |                      |                  |            |                                                                                    |                                                |         |                       |                       |                                  |         |  |         |    |    |          |                  |
|-------------------------------------------------|--------------------------|----------------------|------------------|------------|------------------------------------------------------------------------------------|------------------------------------------------|---------|-----------------------|-----------------------|----------------------------------|---------|--|---------|----|----|----------|------------------|
| d<br>Ar<br>thr<br>itis                          | 87<br>3                  |                      |                  |            | complex<br>, class II,<br>DQ beta<br>2                                             | po<br>nse                                      |         | 7<br>3                | 3<br>1                | 6<br>7<br>9                      |         |  |         |    |    |          |                  |
| Rh<br>eu<br>ma<br>toi<br>d<br>Ar<br>thr<br>itis | C<br>00<br>03<br>87<br>3 | HL<br>A-<br>DQ<br>B3 | 3<br>1<br>2<br>1 |            | major<br>histocompatib<br>ility complex,<br>class II, DQ<br>beta 3                 |                                                | 2       | 0<br>.<br>9<br>3<br>1 | 0<br>.<br>1<br>9<br>2 |                                  | 0.<br>1 |  | 1       | 1  | 11 | 20<br>11 | 2<br>0<br>1<br>1 |
| Rh<br>eu<br>ma<br>toi<br>d<br>Ar<br>thr<br>itis | C<br>00<br>03<br>87<br>3 | HL<br>A-<br>DR<br>A  | 3<br>1<br>2<br>2 | P0190<br>3 | major<br>histoco<br>mpatibil<br>ity<br>complex<br>, class II,<br>DR<br>alpha       | Im<br>mu<br>ne<br>res<br>po<br>nse             | 92      | 0<br>.<br>5<br>8<br>1 | 0<br>.<br>7<br>6<br>9 | 0.<br>5<br>1<br>9<br>4<br>9      | 0.<br>1 |  | 1       | 3  | 36 | 20<br>07 | 2<br>0<br>1<br>1 |
| Rh<br>eu<br>ma<br>toi<br>d<br>Ar<br>thr<br>itis | C<br>00<br>03<br>87<br>3 | HL<br>A-<br>DR<br>B4 | 3<br>1<br>2<br>6 | P1376<br>2 | major<br>histoco<br>mpatibil<br>ity<br>complex<br>, class II,<br>DR beta<br>4      | Im<br>mu<br>ne<br>res<br>po<br>nse             | 87      | 0<br>.<br>5<br>6<br>5 | 0<br>.<br>8<br>4<br>6 |                                  | 0.<br>1 |  | 0.<br>8 | 10 | 0  | 19<br>89 | 2<br>0<br>1<br>9 |
| Rh<br>eu<br>ma<br>toi<br>d<br>Ar<br>thr<br>itis | C<br>00<br>03<br>87<br>3 | HL<br>A-<br>DR<br>B9 | 3<br>1<br>3<br>2 |            | major<br>histocompatib<br>ility complex,<br>class II, DR<br>beta 9<br>(pseudogene) |                                                | 33      | 0<br>.<br>6<br>8<br>2 | 0<br>.<br>6<br>5<br>4 |                                  | 0.<br>1 |  | 1       | 6  | 21 | 20<br>07 | 2<br>0<br>1<br>9 |
| Rh<br>eu<br>ma<br>toi<br>d<br>Ar<br>thr<br>itis | C<br>00<br>03<br>87<br>3 | HL<br>A-<br>G        | 3<br>1<br>3<br>5 | P1769<br>3 | major<br>histocompatib<br>ility complex,<br>class I, G                             |                                                | 27<br>9 | 0<br>.<br>4<br>6<br>1 | 0<br>.<br>7<br>6<br>9 | 1.<br>3<br>7<br>E<br>-<br>1<br>1 | 0.<br>1 |  | 0.<br>9 | 10 | 2  | 20<br>06 | 2<br>0<br>1<br>7 |
| Rh<br>eu<br>ma<br>toi<br>d<br>Ar<br>thr<br>itis | C<br>00<br>03<br>87<br>3 | HM<br>GB<br>1        | 3<br>1<br>4<br>6 | P0942<br>9 | high<br>mobility<br>group<br>box 1                                                 | Nu<br>cle<br>ic<br>aci<br>d<br>bin<br>din<br>g | 72<br>4 | 0<br>.<br>3<br>6<br>8 | 0<br>.<br>9<br>2<br>3 | 0.<br>8<br>2<br>0<br>3<br>5      | 0.<br>1 |  | 1       | 20 | 3  | 20<br>03 | 2<br>0<br>2<br>0 |

|                      |        |          |      |        |                                              |      |        |       |         |     |  |       |    |   |      |      |
|----------------------|--------|----------|------|--------|----------------------------------------------|------|--------|-------|---------|-----|--|-------|----|---|------|------|
| Rheumatoid Arthritis | C00873 | HS PA 4  | 3308 | P34932 | heat shock protein family A (Hsp70) member 4 | 550  | 0.394  | 0.923 | 0.9954  | 0.1 |  | 0.929 | 14 | 0 | 1996 | 2019 |
| Rheumatoid Arthritis | C00873 | HS PD 1  | 3329 | P10809 | heat shock protein family D (Hsp60) member 1 | 398  | 0.432  | 0.808 | 0.9257  | 0.1 |  | 1     | 12 | 1 | 1993 | 2020 |
| Rheumatoid Arthritis | C00873 | IC AM 1  | 3383 | P05362 | intercellular adhesion molecule 1            | 737  | 0.364  | 0.962 | 0.03295 | 0.1 |  | 0.963 | 27 | 3 | 1996 | 2020 |
| Rheumatoid Arthritis | C00873 | IFN A1   | 3439 | P01562 | interferon alpha 1                           | 662  | 0.371  | 0.923 |         | 0.1 |  | 0.857 | 14 | 0 | 2003 | 2019 |
| Rheumatoid Arthritis | C00873 | IFN A1 3 | 3447 | P01562 | interferon alpha 13                          | 646  | 0.374  | 0.923 |         | 0.1 |  | 0.857 | 14 | 0 | 2003 | 2019 |
| Rheumatoid Arthritis | C00873 | IGF 1    | 3479 | P05019 | insulin like growth factor 1                 | 1206 | 0.3188 | 0.816 | 0.2716  | 0.1 |  | 0.941 | 17 | 0 | 1995 | 2019 |
| Rheumatoid Ar        | C00873 | FA S     | 355  | P25445 | Fas cell surface death receptor              | 754  | 0.372  | 0.923 | 0.817   | 0.1 |  | 0.7   | 10 | 2 | 1999 | 2015 |



|                                                 |                          |          |                  |            |                        |          |                       |                       |                                  |         |  |                   |         |   |          |                  |
|-------------------------------------------------|--------------------------|----------|------------------|------------|------------------------|----------|-----------------------|-----------------------|----------------------------------|---------|--|-------------------|---------|---|----------|------------------|
| thr<br>itis                                     |                          |          |                  |            |                        |          |                       |                       |                                  |         |  |                   |         |   |          |                  |
| Rh<br>eu<br>ma<br>toi<br>d<br>Ar<br>thr<br>itis | C<br>00<br>03<br>87<br>3 | IL1<br>A | 3<br>5<br>5<br>2 | P0158<br>3 | interleukin 1<br>alpha | 10<br>02 | 0<br>.<br>3<br>3      | 0<br>.<br>9<br>6<br>2 | 0.<br>0<br>0<br>1<br>6           | 0.<br>1 |  | 1                 | 10<br>4 | 1 | 19<br>88 | 2<br>0<br>2<br>0 |
| Rh<br>eu<br>ma<br>toi<br>d<br>Ar<br>thr<br>itis | C<br>00<br>03<br>87<br>3 | IL2      | 3<br>5<br>5<br>8 | P6056<br>8 | interleukin 2          | 95<br>0  | 0<br>.<br>3<br>6      | 0<br>.<br>8<br>8<br>5 | 0.<br>4<br>7<br>9<br>6<br>8      | 0.<br>1 |  | 0.<br>9<br>7<br>8 | 46      | 1 | 19<br>86 | 2<br>0<br>1<br>9 |
| Rh<br>eu<br>ma<br>toi<br>d<br>Ar<br>thr<br>itis | C<br>00<br>03<br>87<br>3 | IL4      | 3<br>5<br>6<br>5 | P0511<br>2 | interleukin 4          | 99<br>6  | 0<br>.<br>3<br>2      | 0<br>.<br>9<br>6<br>2 | 0.<br>0<br>4<br>7<br>3<br>7      | 0.<br>1 |  | 0.<br>9<br>4<br>2 | 52      | 1 | 19<br>92 | 2<br>0<br>1<br>9 |
| Rh<br>eu<br>ma<br>toi<br>d<br>Ar<br>thr<br>itis | C<br>00<br>03<br>87<br>3 | IL7      | 3<br>5<br>7<br>4 | P1323<br>2 | interleukin 7          | 27<br>5  | 0<br>.<br>4<br>6<br>4 | 0<br>.<br>8<br>0<br>8 | 0.<br>9<br>2<br>5<br>7<br>4      | 0.<br>1 |  | 1                 | 11      | 0 | 20<br>05 | 2<br>0<br>1<br>9 |
| Rh<br>eu<br>ma<br>toi<br>d<br>Ar<br>thr<br>itis | C<br>00<br>03<br>87<br>3 | IL9      | 3<br>5<br>7<br>8 | P1524<br>8 | interleukin 9          | 29<br>1  | 0<br>.<br>4<br>6<br>1 | 0<br>.<br>8<br>4<br>6 | 8.<br>1<br>1<br>E<br>-<br>0<br>7 | 0.<br>1 |  | 1                 | 12      | 0 | 20<br>00 | 2<br>0<br>1<br>9 |
| Rh<br>eu<br>ma<br>toi<br>d<br>Ar<br>thr<br>itis | C<br>00<br>03<br>87<br>3 | IL1<br>3 | 3<br>5<br>9<br>6 | P3522<br>5 | interleukin 13         | 58<br>7  | 0<br>.<br>3<br>8<br>6 | 0<br>.<br>8<br>4<br>6 | 0.<br>0<br>1<br>4<br>4<br>2<br>6 | 0.<br>1 |  | 1                 | 13      | 1 | 19<br>96 | 2<br>0<br>1<br>9 |
| Rh<br>eu<br>ma<br>toi                           | C<br>00<br>03            | IL1<br>5 | 3<br>6<br>0<br>0 | P4093<br>3 | interleukin 15         | 42<br>6  | 0<br>.<br>4           | 0<br>.<br>8           | 0.<br>7<br>0<br>8                | 0.<br>1 |  | 1                 | 27      | 0 | 19<br>99 | 2<br>0<br>1<br>9 |

|                                                 |                          |                |                  |            |                                                               |                                                |          |                       |                       |                                  |         |  |                   |         |   |          |                  |
|-------------------------------------------------|--------------------------|----------------|------------------|------------|---------------------------------------------------------------|------------------------------------------------|----------|-----------------------|-----------------------|----------------------------------|---------|--|-------------------|---------|---|----------|------------------|
| d<br>Ar<br>thr<br>itis                          | 87<br>3                  |                |                  |            |                                                               |                                                | 2<br>2   | 4<br>6                | 5<br>9                |                                  |         |  |                   |         |   |          |                  |
| Rh<br>eu<br>ma<br>toi<br>d<br>Ar<br>thr<br>itis | C<br>00<br>03<br>87<br>3 | IL1<br>7A      | 3<br>6<br>0<br>5 | Q165<br>52 | interleukin<br>17A                                            |                                                | 10<br>74 | 0<br>.<br>3<br>2<br>4 | 0<br>.<br>9<br>2<br>3 | 0.<br>0<br>4<br>3<br>0<br>4<br>9 | 0.<br>1 |  | 0.<br>9<br>5<br>9 | 19<br>4 | 7 | 19<br>99 | 2<br>0<br>2<br>0 |
| Rh<br>eu<br>ma<br>toi<br>d<br>Ar<br>thr<br>itis | C<br>00<br>03<br>87<br>3 | ILF<br>3       | 3<br>6<br>0<br>9 | Q129<br>06 | interleuk<br>in<br>enhance<br>r binding<br>factor 3           | Nu<br>cle<br>ic<br>aci<br>d<br>bin<br>din<br>g | 68       | 0<br>.<br>6<br>2<br>1 | 0<br>.<br>6<br>5<br>4 | 1                                | 0.<br>1 |  | 1                 | 1       | 1 | 20<br>19 | 2<br>0<br>1<br>9 |
| Rh<br>eu<br>ma<br>toi<br>d<br>Ar<br>thr<br>itis | C<br>00<br>03<br>87<br>3 | CX<br>CL<br>10 | 3<br>6<br>2<br>7 | P0277<br>8 | C-X-C<br>motif<br>chemoki<br>ne<br>ligand<br>10               | Sig<br>nal<br>ing                              | 63<br>1  | 0<br>.<br>3<br>7<br>8 | 0<br>.<br>8<br>8<br>5 | 0.<br>3<br>6<br>8<br>6<br>5      | 0.<br>1 |  | 0.<br>9           | 20      | 1 | 20<br>01 | 2<br>0<br>1<br>9 |
| Rh<br>eu<br>ma<br>toi<br>d<br>Ar<br>thr<br>itis | C<br>00<br>03<br>87<br>3 | AR             | 3<br>6<br>7      | P1027<br>5 | androge<br>n<br>receptor                                      | Nu<br>cle<br>ar<br>rec<br>ept<br>or            | 85<br>4  | 0<br>.<br>3<br>5<br>1 | 0<br>.<br>8<br>4<br>6 | 0.<br>9<br>8<br>8<br>3<br>7      | 0.<br>1 |  | 0.<br>9           | 10      | 0 | 19<br>99 | 2<br>0<br>1<br>6 |
| Rh<br>eu<br>ma<br>toi<br>d<br>Ar<br>thr<br>itis | C<br>00<br>03<br>87<br>3 | ITP<br>R3      | 3<br>7<br>1<br>0 | Q145<br>73 | inositol<br>1,4,5-<br>trisphos<br>phate<br>receptor<br>type 3 | Ion<br>ch<br>an<br>nel                         | 11<br>2  | 0<br>.<br>5<br>5<br>5 | 0<br>.<br>8<br>0<br>8 | 2.<br>5<br>5<br>E<br>-<br>2<br>2 | 0.<br>1 |  | 1                 | 3       | 8 | 20<br>07 | 2<br>0<br>1<br>1 |
| Rh<br>eu<br>ma<br>toi<br>d<br>Ar<br>thr<br>itis | C<br>00<br>03<br>87<br>3 | JA<br>K1       | 3<br>7<br>1<br>6 | P2345<br>8 | Janus<br>kinase 1                                             | Ki<br>nas<br>e                                 | 23<br>9  | 0<br>.<br>4<br>7<br>4 | 0<br>.<br>7<br>6<br>9 | 0.<br>9<br>9<br>9<br>8           | 0.<br>1 |  | 1                 | 30      | 0 | 20<br>13 | 2<br>0<br>2<br>0 |

|                      |          |          |        |        |                                                                                        |          |     |       |       |          |     |  |       |    |   |      |      |
|----------------------|----------|----------|--------|--------|----------------------------------------------------------------------------------------|----------|-----|-------|-------|----------|-----|--|-------|----|---|------|------|
| Rheumatoid Arthritis | C0003873 | JA K2    | 3717   | O60674 | Janus kinase 2                                                                         | Kinase   | 644 | 0.385 | 0.885 | 0.6572   | 0.1 |  | 1     | 19 | 0 | 2011 | 2020 |
| Rheumatoid Arthritis | C0003873 | JA K3    | 3718   | P52333 | Janus kinase 3                                                                         | Kinase   | 194 | 0.505 | 0.731 | 5.93E-06 | 0.1 |  | 0.923 | 13 | 0 | 2011 | 2020 |
| Rheumatoid Arthritis | C0003873 | GA LNT18 | 374378 | Q6P9A2 | polypeptide N-acetylgalactosaminyltransferase 18                                       |          | 3   | 0.931 | 0.192 | 0.0033   | 0.1 |  | 1     | 1  | 1 | 2013 | 2013 |
| Rheumatoid Arthritis | C0003873 | KD R     | 3791   | P35968 | kinase insert domain receptor                                                          | Kinase   | 623 | 0.378 | 0.885 | 0.9982   | 0.1 |  | 1     | 10 | 3 | 2002 | 2019 |
| Rheumatoid Arthritis | C0003873 | KI R3DL1 | 3811   | P43629 | killer cell immunoglobulin like receptor, three Ig domains and long cytoplasmic tail 1 | Receptor | 231 | 0.475 | 0.769 | 8.36E-14 | 0.1 |  | 0.909 | 11 | 0 | 2006 | 2019 |
| Rheumatoid Arthritis | C0003873 | ZK SCAN4 | 387032 | Q969J2 | zinc finger with KRAB and SCAN domains 4                                               |          | 8   | 0.839 | 0.269 | 0.00142  | 0.1 |  | 1     | 1  | 2 | 2009 | 2009 |

|                      |          |            |        |        |                                             |           |     |       |         |          |     |  |       |    |   |      |      |
|----------------------|----------|------------|--------|--------|---------------------------------------------|-----------|-----|-------|---------|----------|-----|--|-------|----|---|------|------|
| Rheumatoid Arthritis | C0003873 | TEM179     | 388021 | Q6ZVK1 | transmembrane protein 179                   |           | 1   | 1     | 0.115   | 0.67923  | 0.1 |  | 1     | 1  | 1 | 2019 | 2019 |
| Rheumatoid Arthritis | C0003873 | SFTA2      | 389376 | Q6UW10 | surfactant associated 2                     |           | 25  | 0.695 | 0.577   | 0.03641  | 0.1 |  | 1     | 2  | 3 | 2007 | 2009 |
| Rheumatoid Arthritis | C0003873 | COL1A2P1   | 394214 |        | collagen type XI alpha 2 pseudogene 1       |           | 7   | 0.805 | 0.462   |          | 0.1 |  | 1     | 3  | 5 | 2007 | 2011 |
| Rheumatoid Arthritis | C0003873 | LEP        | 39952  | P41159 | leptin                                      |           | 931 | 0.349 | 0.84691 | 0.4691   | 0.1 |  | 0.929 | 14 | 1 | 2007 | 2020 |
| Rheumatoid Arthritis | C0003873 | LGALS3     | 3958   | P17931 | galectin 3                                  | Signaling | 557 | 0.392 | 0.846   | 2.32E-05 | 0.1 |  | 0.917 | 12 | 2 | 2000 | 2019 |
| Rheumatoid Arthritis | C0003873 | LIINC02649 | 399715 |        | long intergenic non-protein coding RNA 2649 |           | 10  | 0.792 | 0.308   |          | 0.1 |  | 1     | 5  | 2 | 2012 | 2019 |
| Rheumatoid Ar        | C0003873 | LIINC02656 | 399716 |        | long intergenic non-protein coding RNA 2656 |           | 4   | 0.931 | 0.154   |          | 0.1 |  | 1     | 1  | 2 | 2012 | 202  |

|                                                 |                          |                           |                            |            |                                                         |         |                       |                       |                                  |         |  |   |   |   |          |                  |
|-------------------------------------------------|--------------------------|---------------------------|----------------------------|------------|---------------------------------------------------------|---------|-----------------------|-----------------------|----------------------------------|---------|--|---|---|---|----------|------------------|
| thr<br>itis                                     |                          |                           |                            |            |                                                         |         |                       |                       |                                  |         |  |   |   |   |          |                  |
| Rh<br>eu<br>ma<br>toi<br>d<br>Ar<br>thr<br>itis | C<br>00<br>03<br>87<br>3 | GA<br>TA<br>3-<br>AS<br>1 | 3<br>9<br>9<br>7<br>1<br>7 |            | GATA3<br>antisense<br>RNA 1                             | 2       | 0<br>.<br>9<br>3<br>1 | 0<br>.<br>1<br>9<br>2 |                                  | 0.<br>1 |  | 1 | 1 | 1 | 20<br>12 | 2<br>0<br>1<br>2 |
| Rh<br>eu<br>ma<br>toi<br>d<br>Ar<br>thr<br>itis | C<br>00<br>03<br>87<br>3 | LM<br>NA                  | 4<br>0<br>0<br>0           | P0254<br>5 | lamin A/C                                               | 82<br>4 | 0<br>.<br>3<br>8<br>4 | 0<br>.<br>8<br>8<br>5 | 0.<br>9<br>9<br>4                | 0.<br>1 |  | 1 | 1 | 1 | 20<br>19 | 2<br>0<br>1<br>9 |
| Rh<br>eu<br>ma<br>toi<br>d<br>Ar<br>thr<br>itis | C<br>00<br>03<br>87<br>3 | LI<br>NC<br>011<br>85     | 4<br>0<br>0<br>9<br>5<br>7 |            | long<br>intergenic<br>non-protein<br>coding RNA<br>1185 | 13      | 0<br>.<br>7<br>4<br>3 | 0<br>.<br>3<br>4<br>6 |                                  | 0.<br>1 |  | 1 | 2 | 2 | 20<br>09 | 2<br>0<br>1<br>6 |
| Rh<br>eu<br>ma<br>toi<br>d<br>Ar<br>thr<br>itis | C<br>00<br>03<br>87<br>3 | LI<br>NC<br>002<br>43     | 4<br>0<br>1<br>2<br>4<br>7 |            | long<br>intergenic<br>non-protein<br>coding RNA<br>243  | 24      | 0<br>.<br>7<br>2<br>9 | 0<br>.<br>4<br>2<br>3 |                                  | 0.<br>1 |  | 1 | 2 | 6 | 20<br>07 | 2<br>0<br>0<br>9 |
| Rh<br>eu<br>ma<br>toi<br>d<br>Ar<br>thr<br>itis | C<br>00<br>03<br>87<br>3 | MC<br>CD<br>1             | 4<br>0<br>1<br>2<br>5<br>0 | P5994<br>2 | mitochondrial<br>coiled-coil<br>domain 1                | 6       | 0<br>.<br>8<br>9      | 0<br>.<br>2<br>3<br>1 | 0.<br>0<br>0<br>1<br>9<br>3<br>2 | 0.<br>1 |  | 1 | 1 | 3 | 20<br>11 | 2<br>0<br>1<br>1 |
| Rh<br>eu<br>ma<br>toi<br>d<br>Ar<br>thr<br>itis | C<br>00<br>03<br>87<br>3 | TRI<br>M2<br>6B<br>P      | 4<br>0<br>4<br>0<br>2<br>4 |            | tripartite motif<br>containing<br>26B,<br>pseudogene    | 4       | 0<br>.<br>8<br>6<br>1 | 0<br>.<br>2<br>6<br>9 |                                  | 0.<br>1 |  | 1 | 1 | 1 | 20<br>09 | 2<br>0<br>0<br>9 |
| Rh<br>eu<br>ma<br>toi                           | C<br>00<br>03            | MT<br>CO<br>3P1           | 4<br>0<br>4<br>0           |            | MT-CO3<br>pseudogene 1                                  | 5       | 0<br>.<br>8           | 0<br>.<br>2           |                                  | 0.<br>1 |  | 1 | 1 | 2 | 20<br>11 | 2<br>0<br>1<br>1 |

|                                                 |                          |                     |                            |            |                                 |                   |         |                       |                       |                             |         |  |                   |    |   |          |                  |
|-------------------------------------------------|--------------------------|---------------------|----------------------------|------------|---------------------------------|-------------------|---------|-----------------------|-----------------------|-----------------------------|---------|--|-------------------|----|---|----------|------------------|
| d<br>Ar<br>thr<br>itis                          | 87<br>3                  |                     | 2<br>6                     |            |                                 |                   | 6<br>1  | 3<br>1                |                       |                             |         |  |                   |    |   |          |                  |
| Rh<br>eu<br>ma<br>toi<br>d<br>Ar<br>thr<br>itis | C<br>00<br>03<br>87<br>3 | LT<br>A             | 4<br>0<br>4<br>9           | P0137<br>4 | lymphot<br>oxin<br>alpha        | Sig<br>nal<br>ing | 35<br>3 | 0<br>.<br>4<br>3<br>4 | 0<br>.<br>8<br>8<br>5 | 0.<br>1<br>9<br>6<br>8<br>5 | 0.<br>1 |  | 0.<br>8<br>6<br>7 | 15 | 7 | 19<br>94 | 2<br>0<br>1<br>9 |
| Rh<br>eu<br>ma<br>toi<br>d<br>Ar<br>thr<br>itis | C<br>00<br>03<br>87<br>3 | MI<br>R1<br>46<br>A | 4<br>0<br>6<br>9<br>3<br>8 |            | microRNA<br>146a                |                   | 50<br>5 | 0<br>.<br>3<br>9<br>8 | 0<br>.<br>8<br>8<br>5 |                             | 0.<br>1 |  | 0.<br>8<br>8<br>9 | 36 | 1 | 20<br>08 | 2<br>0<br>1<br>9 |
| Rh<br>eu<br>ma<br>toi<br>d<br>Ar<br>thr<br>itis | C<br>00<br>03<br>87<br>3 | MI<br>R1<br>55      | 4<br>0<br>6<br>9<br>4<br>7 |            | microRNA<br>155                 |                   | 58<br>4 | 0<br>.<br>3<br>8<br>4 | 0<br>.<br>8<br>8<br>5 |                             | 0.<br>1 |  | 1                 | 29 | 1 | 20<br>08 | 2<br>0<br>1<br>9 |
| Rh<br>eu<br>ma<br>toi<br>d<br>Ar<br>thr<br>itis | C<br>00<br>03<br>87<br>3 | MI<br>R2<br>23      | 4<br>0<br>7<br>0<br>0<br>8 |            | microRNA<br>223                 |                   | 34<br>8 | 0<br>.<br>4<br>3<br>3 | 0<br>.<br>8<br>0<br>8 |                             | 0.<br>1 |  | 1                 | 15 | 0 | 20<br>10 | 2<br>0<br>1<br>9 |
| Rh<br>eu<br>ma<br>toi<br>d<br>Ar<br>thr<br>itis | C<br>00<br>03<br>87<br>3 | DD<br>R1-<br>DT     | 4<br>1<br>4<br>7<br>7<br>1 |            | DDR1<br>divergent<br>transcript |                   | 2       | 0<br>.<br>9<br>3<br>1 | 0<br>.<br>1<br>1<br>5 |                             | 0.<br>1 |  | 1                 | 2  | 1 | 20<br>07 | 2<br>0<br>0<br>9 |
| Rh<br>eu<br>ma<br>toi<br>d<br>Ar<br>thr<br>itis | C<br>00<br>03<br>87<br>3 | HC<br>G1<br>8       | 4<br>1<br>4<br>7<br>7<br>7 |            | HLA complex<br>group 18         |                   | 27      | 0<br>.<br>7<br>2<br>2 | 0<br>.<br>5<br>3<br>8 |                             | 0.<br>1 |  | 1                 | 2  | 4 | 20<br>07 | 2<br>0<br>0<br>9 |

|                      |          |        |        |        |                                                  |          |      |       |       |          |     |  |       |    |   |      |      |
|----------------------|----------|--------|--------|--------|--------------------------------------------------|----------|------|-------|-------|----------|-----|--|-------|----|---|------|------|
| Rheumatoid Arthritis | C0003873 | HG17   | 414778 |        | HLA complex group 17                             |          | 17   | 0.769 | 0.346 |          | 0.1 |  | 1     | 2  | 6 | 2007 | 2009 |
| Rheumatoid Arthritis | C0003873 | MBL2   | 4153   | P11226 | mannose binding lectin 2                         | Receptor | 563  | 0.39  | 0.846 | 0.02684  | 0.1 |  | 0.875 | 32 | 5 | 1998 | 2019 |
| Rheumatoid Arthritis | C0003873 | MEFV   | 4210   | O15553 | MEFV innate immunity regulator, pyrin            |          | 410  | 0.44  | 0.885 | 1.02E-14 | 0.1 |  | 0.929 | 14 | 2 | 2004 | 2019 |
| Rheumatoid Arthritis | C0003873 | MAP3K4 | 4216   | Q9Y6R4 | mitogen-activated protein kinase kinase kinase 4 | Kinase   | 21   | 0.729 | 0.462 | 1        | 0.1 |  | 1     | 1  | 2 | 2013 | 2013 |
| Rheumatoid Arthritis | C0003873 | MP1    | 4312   | P03956 | matrix metalloproteinase 1                       | Enzyme   | 589  | 0.385 | 0.885 | 7.72E-18 | 0.1 |  | 0.982 | 56 | 0 | 1992 | 2019 |
| Rheumatoid Arthritis | C0003873 | MP3    | 4314   | P08254 | matrix metalloproteinase 3                       | Enzyme   | 473  | 0.408 | 0.885 | 5.74E-15 | 0.1 |  | 0.974 | 78 | 0 | 1996 | 2019 |
| Rheumatoid Ar        | C0003873 | MP9    | 4318   | P14780 | matrix metalloproteinase 9                       | Enzyme   | 1337 | 0.305 | 0.923 | 1.89E-3  | 0.1 |  | 1     | 32 | 1 | 1999 | 2019 |

|                                                 |                          |                 |                            |            |                                              |                                                |         |                       |                       |                                  |         |  |   |    |    |          |                  |
|-------------------------------------------------|--------------------------|-----------------|----------------------------|------------|----------------------------------------------|------------------------------------------------|---------|-----------------------|-----------------------|----------------------------------|---------|--|---|----|----|----------|------------------|
| thr<br>itis                                     |                          |                 |                            |            |                                              |                                                |         |                       | 1<br>7                |                                  |         |  |   |    |    |          |                  |
| Rh<br>eu<br>ma<br>toi<br>d<br>Ar<br>thr<br>itis | C<br>00<br>03<br>87<br>3 | M<br>MP<br>13   | 4<br>3<br>2<br>2           | P4545<br>2 | matrix<br>metallo<br>peptidase<br>13         | En<br>zy<br>me                                 | 32<br>8 | 0<br>.<br>4<br>5<br>2 | 0<br>.<br>9<br>2<br>3 | 7.<br>8<br>8<br>E<br>-<br>1<br>8 | 0.<br>1 |  | 1 | 34 | 0  | 19<br>96 | 2<br>0<br>2<br>0 |
| Rh<br>eu<br>ma<br>toi<br>d<br>Ar<br>thr<br>itis | C<br>00<br>03<br>87<br>3 | BC<br>L2<br>L15 | 4<br>4<br>0<br>6<br>0<br>3 | Q5TB<br>C7 | BCL2 like 15                                 |                                                | 4       | 0<br>.<br>8<br>9      | 0<br>.<br>1<br>9<br>2 | 0.<br>0<br>4<br>8<br>2<br>4<br>6 | 0.<br>1 |  | 1 | 1  | 2  | 20<br>09 | 2<br>0<br>0<br>9 |
| Rh<br>eu<br>ma<br>toi<br>d<br>Ar<br>thr<br>itis | C<br>00<br>03<br>87<br>3 | MY<br>L8<br>P   | 4<br>4<br>2<br>2<br>0<br>4 |            | myosin light<br>chain 8,<br>pseudogene       |                                                | 1       | 1                     | 0<br>.<br>1<br>1<br>5 |                                  | 0.<br>1 |  | 1 | 1  | 1  | 20<br>11 | 2<br>0<br>1<br>1 |
| Rh<br>eu<br>ma<br>toi<br>d<br>Ar<br>thr<br>itis | C<br>00<br>03<br>87<br>3 | MS<br>H5        | 4<br>4<br>3<br>9           | O431<br>96 | mutS<br>homolog<br>5                         | Nu<br>cle<br>ic<br>aci<br>d<br>bin<br>din<br>g | 51      | 0<br>.<br>6<br>4<br>1 | 0<br>.<br>6<br>9<br>2 | 3.<br>2<br>E<br>-<br>1<br>1      | 0.<br>1 |  | 1 | 3  | 10 | 20<br>07 | 2<br>0<br>1<br>1 |
| Rh<br>eu<br>ma<br>toi<br>d<br>Ar<br>thr<br>itis | C<br>00<br>03<br>87<br>3 | MS<br>I1        | 4<br>4<br>4<br>0           | O433<br>47 | musashi RNA<br>binding<br>protein 1          |                                                | 11<br>6 | 0<br>.<br>5<br>5      | 0<br>.<br>6<br>1<br>5 | 0.<br>9<br>9<br>3<br>5<br>7      | 0.<br>1 |  | 1 | 1  | 1  | 20<br>19 | 2<br>0<br>1<br>9 |
| Rh<br>eu<br>ma<br>toi<br>d<br>Ar<br>thr<br>itis | C<br>00<br>03<br>87<br>3 | CO<br>X2        | 4<br>5<br>1<br>3           | P0040<br>3 | cytochro<br>me c<br>oxidase<br>subunit<br>II | En<br>zy<br>me                                 | 87<br>5 | 0<br>.<br>3<br>5<br>2 | 0<br>.<br>9<br>6<br>2 |                                  | 0.<br>1 |  | 1 | 27 | 0  | 19<br>94 | 2<br>0<br>1<br>9 |
| Rh<br>eu<br>ma<br>toi                           | C<br>00<br>03            | MT<br>F1        | 4<br>5<br>2<br>0           | Q148<br>72 | metal<br>regulato<br>ry<br>transcrip         | Tr<br>ans<br>cri<br>pti                        | 21      | 0<br>.<br>7           | 0<br>.<br>5           | 0.<br>9<br>6<br>8                | 0.<br>1 |  | 1 | 2  | 1  | 20<br>14 | 2<br>0<br>1<br>9 |



|                                                 |                          |                |                            |            |                                              |                                             |         |                       |                       |                                  |         |  |                   |    |   |          |                  |
|-------------------------------------------------|--------------------------|----------------|----------------------------|------------|----------------------------------------------|---------------------------------------------|---------|-----------------------|-----------------------|----------------------------------|---------|--|-------------------|----|---|----------|------------------|
| d<br>Ar<br>thr<br>itis                          | 87<br>3                  |                |                            |            | tion<br>factor 1                             | on<br>fac<br>tor                            |         | 5<br>1                |                       | 9<br>7                           |         |  |                   |    |   |          |                  |
| Rh<br>eu<br>ma<br>toi<br>d<br>Ar<br>thr<br>itis | C<br>00<br>03<br>87<br>3 | MT<br>X1       | 4<br>5<br>8<br>0           | Q135<br>05 | metaxin 1                                    |                                             | 12<br>4 | 0<br>.<br>5<br>4<br>6 | 0<br>.<br>7<br>3<br>1 | 0.<br>0<br>1<br>3<br>2<br>7<br>1 | 0.<br>1 |  | 0.<br>9<br>6<br>9 | 32 | 0 | 20<br>02 | 2<br>0<br>2<br>0 |
| Rh<br>eu<br>ma<br>toi<br>d<br>Ar<br>thr<br>itis | C<br>00<br>03<br>87<br>3 | LR<br>RC<br>18 | 4<br>7<br>4<br>3<br>5<br>4 | Q8N4<br>56 | leucine rich<br>repeat<br>containing 18      |                                             | 2       | 0<br>.<br>9<br>3<br>1 | 0<br>.<br>1<br>1<br>5 | 3.<br>5<br>1<br>E<br>-<br>0<br>5 | 0.<br>1 |  | 1                 | 1  | 2 | 20<br>09 | 2<br>0<br>0<br>9 |
| Rh<br>eu<br>ma<br>toi<br>d<br>Ar<br>thr<br>itis | C<br>00<br>03<br>87<br>3 | NF<br>KB<br>1  | 4<br>7<br>9<br>0           | P1983<br>8 | nuclear<br>factor<br>kappa B<br>subunit<br>1 | Tr<br>ans<br>cri<br>pti<br>on<br>fac<br>tor | 55<br>1 | 0<br>.<br>3<br>9<br>6 | 0<br>.<br>9<br>2<br>3 | 1                                | 0.<br>1 |  | 0.<br>9<br>2<br>9 | 14 | 2 | 20<br>02 | 2<br>0<br>1<br>9 |
| Rh<br>eu<br>ma<br>toi<br>d<br>Ar<br>thr<br>itis | C<br>00<br>03<br>87<br>3 | NM             | 4<br>8<br>2<br>7           |            | neutrophil<br>migration                      |                                             | 25<br>0 | 0<br>.<br>4<br>7<br>3 | 0<br>.<br>8<br>0<br>8 |                                  | 0.<br>1 |  | 0.<br>9<br>1<br>7 | 12 | 0 | 20<br>00 | 2<br>0<br>2<br>0 |
| Rh<br>eu<br>ma<br>toi<br>d<br>Ar<br>thr<br>itis | C<br>00<br>03<br>87<br>3 | NO<br>S3       | 4<br>8<br>4<br>6           | P2947<br>4 | nitric oxide<br>synthase 3                   |                                             | 70<br>6 | 0<br>.<br>3<br>7<br>8 | 0<br>.<br>8<br>8<br>5 | 6.<br>7<br>2<br>E<br>-<br>0<br>7 | 0.<br>1 |  | 1                 | 10 | 1 | 20<br>04 | 2<br>0<br>2<br>0 |
| Rh<br>eu<br>ma<br>toi<br>d<br>Ar<br>thr<br>itis | C<br>00<br>03<br>87<br>3 | AC<br>R        | 4<br>9                     | P1032<br>3 | acrosin                                      | En<br>zy<br>me                              | 23<br>0 | 0<br>.<br>4<br>9<br>3 | 0<br>.<br>8<br>4<br>6 | 0.<br>0<br>1<br>2<br>2<br>1<br>5 | 0.<br>1 |  | 1                 | 51 | 1 | 19<br>93 | 2<br>0<br>2<br>0 |
| Rh<br>eu                                        | C<br>00                  | NU<br>P88      | 4<br>9                     | Q995<br>67 | nucleop<br>orin 88                           | Tr<br>ans                                   | 58      | 0<br>.                | 0<br>.                | 1.<br>9                          | 0.<br>1 |  | 1                 | 2  | 1 | 20<br>14 | 2<br>0           |

|                                                 |                          |                |                       |            |                                           |                                             |         |                       |                                      |                                  |         |  |                   |    |   |          |                  |
|-------------------------------------------------|--------------------------|----------------|-----------------------|------------|-------------------------------------------|---------------------------------------------|---------|-----------------------|--------------------------------------|----------------------------------|---------|--|-------------------|----|---|----------|------------------|
| ma<br>toi<br>d<br>Ar<br>thr<br>itis             | 03<br>87<br>3            |                | 2<br>7                |            |                                           | por<br>ter                                  |         | 6<br>5<br>9           | 5<br>7<br>7                          | 6<br>E<br>-<br>0<br>8            |         |  |                   |    |   |          | 1<br>9           |
| Rh<br>eu<br>ma<br>toi<br>d<br>Ar<br>thr<br>itis | C<br>00<br>03<br>87<br>3 | IL2<br>0       | 5<br>0<br>6<br>0<br>4 | Q9N<br>YY1 | interleukin 20                            |                                             | 11<br>1 | 0<br>.<br>5<br>5<br>6 | 0<br>.<br>7<br>6<br>9                | 1.<br>3<br>4<br>E<br>-<br>0<br>6 | 0.<br>1 |  | 0.<br>9<br>2<br>9 | 14 | 0 | 20<br>06 | 2<br>0<br>1<br>9 |
| Rh<br>eu<br>ma<br>toi<br>d<br>Ar<br>thr<br>itis | C<br>00<br>03<br>87<br>3 | IL2<br>2       | 5<br>0<br>6<br>1<br>6 | Q9GZ<br>X6 | interleukin 22                            |                                             | 55<br>1 | 0<br>.<br>3<br>9<br>3 | 0<br>.<br>8<br>8<br>5                | 0.<br>0<br>0<br>0<br>1<br>8<br>8 | 0.<br>1 |  | 0.<br>9<br>3<br>3 | 45 | 0 | 20<br>05 | 2<br>0<br>2<br>0 |
| Rh<br>eu<br>ma<br>toi<br>d<br>Ar<br>thr<br>itis | C<br>00<br>03<br>87<br>3 | SN<br>HG<br>32 | 5<br>0<br>8<br>5<br>4 |            | small<br>nucleolar<br>RNA host<br>gene 32 |                                             | 12      | 0<br>.<br>8<br>0<br>5 | 0<br>.<br>3<br>0<br>8                | 0.<br>0<br>2<br>3<br>6<br>2<br>1 | 0.<br>1 |  | 1                 | 1  | 1 | 20<br>11 | 2<br>0<br>1<br>1 |
| Rh<br>eu<br>ma<br>toi<br>d<br>Ar<br>thr<br>itis | C<br>00<br>03<br>87<br>3 | PB<br>X2       | 5<br>0<br>8<br>9      | P4042<br>5 | PBX<br>homeob<br>ox 2                     | Tr<br>ans<br>cri<br>pti<br>on<br>fac<br>tor | 29      | 0<br>.<br>6<br>8<br>6 | 0<br>.<br>4<br>6<br>2                | 0.<br>9<br>9<br>5<br>3<br>2      | 0.<br>1 |  | 1                 | 2  | 5 | 20<br>07 | 2<br>0<br>1<br>1 |
| Rh<br>eu<br>ma<br>toi<br>d<br>Ar<br>thr<br>itis | C<br>00<br>03<br>87<br>3 | CP<br>A4       | 5<br>1<br>2<br>0<br>0 | Q9UI<br>42 | carboxy<br>peptidas<br>e A4               | En<br>zy<br>me                              | 49      | 0<br>.<br>6<br>3<br>3 | 0<br>.<br>5<br>9<br>E<br>-<br>1<br>8 | 9.<br>3<br>9<br>E<br>-<br>1<br>8 | 0.<br>1 |  | 1                 | 1  | 1 | 20<br>19 | 2<br>0<br>1<br>9 |
| Rh<br>eu<br>ma<br>toi<br>d<br>Ar<br>thr<br>itis | C<br>00<br>03<br>87<br>3 | PD<br>CD<br>1  | 5<br>1<br>3<br>3      | Q151<br>16 | programmed<br>cell death 1                |                                             | 49<br>7 | 0<br>.<br>4<br>0<br>2 | 0<br>.<br>8<br>4<br>6                | 0.<br>4<br>1<br>7<br>0<br>6      | 0.<br>1 |  | 0.<br>9           | 20 | 4 | 20<br>04 | 2<br>0<br>1<br>9 |

|                      |          |          |       |        |                                                                        |                  |      |       |       |          |     |  |       |    |   |      |      |
|----------------------|----------|----------|-------|--------|------------------------------------------------------------------------|------------------|------|-------|-------|----------|-----|--|-------|----|---|------|------|
| Rheumatoid Arthritis | C0003873 | PD E2A   | 5138  | O00408 | phosphodiesterase 2A                                                   |                  | 47   | 0.666 | 0.577 | 0.631    | 0.1 |  | 1     | 1  | 1 | 2012 | 2012 |
| Rheumatoid Arthritis | C0003873 | WNT16    | 51384 | Q9UBV4 | Wnt family member 16                                                   | Signaling        | 29   | 0.686 | 0.654 | 1.65E-06 | 0.1 |  | 1     | 1  | 1 | 2019 | 2019 |
| Rheumatoid Arthritis | C0003873 | RAB14    | 51552 | P61106 | RAB14, member RAS oncogene family                                      |                  | 35   | 0.674 | 0.615 | 0.99047  | 0.1 |  | 1     | 1  | 1 | 2009 | 2009 |
| Rheumatoid Arthritis | C0003873 | CYRI B   | 51571 | Q9NUQ9 | CYFIP related Rac1 interactor B                                        |                  | 25   | 0.766 | 0.538 | 0.97612  | 0.1 |  | 1     | 1  | 1 | 2019 | 2019 |
| Rheumatoid Arthritis | C0003873 | SERPINA1 | 5265  | P01009 | serpin family A member 1                                               | Enzyme modulator | 482  | 0.411 | 0.923 | 6.85E-08 | 0.1 |  | 0.933 | 15 | 0 | 1976 | 2017 |
| Rheumatoid Arthritis | C0003873 | PIK3CA   | 5290  | P42336 | phosphatidylinositol-4,5-bisphosphate 3-kinase catalytic subunit alpha | Kinase           | 1511 | 0.292 | 0.923 | 1        | 0.1 |  | 1     | 30 | 0 | 2005 | 2020 |
| Rheumatoid Arthritis | C0003873 | PIK3CB   | 5291  | P42338 | phosphatidylinositol-4,5-bisphosphate 3-                               | Kinase           | 1083 | 0.322 | 0.895 | 0.99     | 0.1 |  | 1     | 29 | 0 | 2005 | 2020 |

|                                                 |                          |                |                       |            |                                                                                                     |                |          |                       |                       |                                  |         |  |   |    |   |          |                  |
|-------------------------------------------------|--------------------------|----------------|-----------------------|------------|-----------------------------------------------------------------------------------------------------|----------------|----------|-----------------------|-----------------------|----------------------------------|---------|--|---|----|---|----------|------------------|
| Ar<br>thr<br>itis                               |                          |                |                       |            | kinase<br>catalytic<br>subunit<br>beta                                                              |                |          |                       |                       | 6<br>4                           |         |  |   |    |   |          |                  |
| Rh<br>eu<br>ma<br>toi<br>d<br>Ar<br>thr<br>itis | C<br>00<br>03<br>87<br>3 | PIK<br>3C<br>D | 5<br>2<br>9<br>3      | O003<br>29 | phospha<br>tidylinos<br>itol-4,5-<br>bisphosp<br>hate 3-<br>kinase<br>catalytic<br>subunit<br>delta | Ki<br>nas<br>e | 11<br>19 | 0<br>.<br>3<br>1<br>9 | 0<br>.<br>8<br>8<br>5 | 0.<br>9<br>9<br>9<br>9           | 0.<br>1 |  | 1 | 33 | 0 | 20<br>05 | 2<br>0<br>2<br>0 |
| Rh<br>eu<br>ma<br>toi<br>d<br>Ar<br>thr<br>itis | C<br>00<br>03<br>87<br>3 | PIK<br>3C<br>G | 5<br>2<br>9<br>4      | P4873<br>6 | phospha<br>tidylinos<br>itol-4,5-<br>bisphosp<br>hate 3-<br>kinase<br>catalytic<br>subunit<br>gamma | Ki<br>nas<br>e | 11<br>01 | 0<br>.<br>3<br>2      | 0<br>.<br>8<br>8<br>5 | 1.<br>4<br>1<br>E<br>-<br>0<br>6 | 0.<br>1 |  | 1 | 31 | 0 | 20<br>05 | 2<br>0<br>2<br>0 |
| Rh<br>eu<br>ma<br>toi<br>d<br>Ar<br>thr<br>itis | C<br>00<br>03<br>87<br>3 | PL<br>CL<br>1  | 5<br>3<br>3<br>4      | Q151<br>11 | phospho<br>lipase C<br>like 1<br>(inactive<br>)                                                     | En<br>zy<br>me | 69       | 0<br>.<br>6<br>0<br>8 | 0<br>.<br>6<br>5<br>4 | 0.<br>0<br>1<br>2<br>0<br>5<br>9 | 0.<br>1 |  | 1 | 1  | 1 | 20<br>19 | 2<br>0<br>1<br>9 |
| Rh<br>eu<br>ma<br>toi<br>d<br>Ar<br>thr<br>itis | C<br>00<br>03<br>87<br>3 | IL1<br>7D      | 5<br>3<br>3<br>4<br>2 | Q8TA<br>D2 | interleukin<br>17D                                                                                  |                | 25<br>9  | 0<br>.<br>4<br>6<br>4 | 0<br>.<br>8<br>0<br>8 | 0.<br>1<br>9<br>7<br>9<br>6      | 0.<br>1 |  | 1 | 10 | 0 | 20<br>10 | 2<br>0<br>1<br>9 |
| Rh<br>eu<br>ma<br>toi<br>d<br>Ar<br>thr<br>itis | C<br>00<br>03<br>87<br>3 | PL<br>G        | 5<br>3<br>4<br>0      | P0074<br>7 | plasmin<br>ogen                                                                                     | En<br>zy<br>me | 58<br>6  | 0<br>.<br>3<br>8<br>9 | 0<br>.<br>9<br>2<br>3 | 0.<br>0<br>1<br>0<br>3<br>4<br>5 | 0.<br>1 |  | 1 | 13 | 0 | 19<br>96 | 2<br>0<br>1<br>9 |
| Rh<br>eu<br>ma<br>toi<br>d<br>Ar<br>thr<br>itis | C<br>00<br>03<br>87<br>3 | GD<br>AP<br>1  | 5<br>4<br>3<br>3<br>2 | Q8TB<br>36 | ganglioside<br>induced<br>differentiation<br>associated<br>protein 1                                |                | 96       | 0<br>.<br>6<br>1<br>2 | 0<br>.<br>5<br>3<br>8 | 3.<br>2<br>4<br>E<br>-<br>0<br>8 | 0.<br>1 |  | 1 | 1  | 1 | 20<br>13 | 2<br>0<br>1<br>3 |

|                      |          |         |       |        |                                              |                      |     |       |        |          |     |       |    |   |      |      |
|----------------------|----------|---------|-------|--------|----------------------------------------------|----------------------|-----|-------|--------|----------|-----|-------|----|---|------|------|
| Rheumatoid Arthritis | C0003873 | KRT20   | 54474 | P35900 | keratin 20                                   |                      | 559 | 0.388 | 0.846  | 9.08E-11 | 0.1 | 0.882 | 17 | 1 | 2001 | 2019 |
| Rheumatoid Arthritis | C0003873 | CCHC R1 | 54535 | Q8TD31 | coiled-coil alpha-helical rod protein 1      |                      | 193 | 0.505 | 0.808  | 1.01E-16 | 0.1 | 1     | 2  | 2 | 2007 | 2009 |
| Rheumatoid Arthritis | C0003873 | NECAB2  | 54550 | Q7Z6G3 | N-terminal EF-hand calcium binding protein 2 |                      | 1   | 1     | 0.15   | 2.24E-13 | 0.1 | 1     | 1  | 1 | 2019 | 2019 |
| Rheumatoid Arthritis | C0003873 | POU5F1  | 5460  | Q01860 | POU class 5 homeobox 1                       |                      | 328 | 0.441 | 0.846  | 0.9371   | 0.1 | 1     | 1  | 1 | 2007 | 2007 |
| Rheumatoid Arthritis | C0003873 | RSBN1   | 54665 | Q5VWQ0 | round spermatid basic protein 1              |                      | 3   | 0.89  | 0.15   | 0.09107  | 0.1 | 1     | 1  | 2 | 2009 | 2009 |
| Rheumatoid Arthritis | C0003873 | RBFOX1  | 54715 | Q9NWB1 | RNA binding fox-1 homolog 1                  | Nucleic acid binding | 103 | 0.584 | 0.6923 | 0.9563   | 0.1 | 1     | 1  | 1 | 2019 | 2019 |
| Rheumatoid Ar        | C0003873 | PPIAP9  | 5491  |        | peptidylprolyl isomerase A pseudogene 9      |                      | 1   | 1     | 0.15   |          | 0.1 | 1     | 1  | 1 | 2011 | 2011 |

|                                                 |                          |                      |                       |            |                                                        |                                       |    |                       |                       |                                  |         |  |   |   |   |          |                  |
|-------------------------------------------------|--------------------------|----------------------|-----------------------|------------|--------------------------------------------------------|---------------------------------------|----|-----------------------|-----------------------|----------------------------------|---------|--|---|---|---|----------|------------------|
| thr<br>itis                                     |                          |                      |                       |            |                                                        |                                       |    |                       |                       |                                  |         |  |   |   |   |          |                  |
| Rh<br>eu<br>ma<br>toi<br>d<br>Ar<br>thr<br>itis | C<br>00<br>03<br>87<br>3 | VP<br>S37<br>C       | 5<br>5<br>0<br>4<br>8 | A5D8<br>V6 | VPS37C<br>subunit<br>of<br>ESCRT-I                     |                                       | 5  | 0<br>.<br>8<br>6<br>1 | 0<br>.<br>1<br>1<br>5 | 0.<br>0<br>3<br>8<br>2<br>3<br>6 | 0.<br>1 |  | 1 | 1 | 1 | 20<br>12 | 2<br>0<br>1<br>2 |
| Rh<br>eu<br>ma<br>toi<br>d<br>Ar<br>thr<br>itis | C<br>00<br>03<br>87<br>3 | EN<br>OX<br>1        | 5<br>5<br>0<br>6<br>8 | Q8TC<br>92 | ecto-<br>NOX<br>disulfide<br>-thiol<br>exchang<br>er 1 | En<br>zy<br>me                        | 15 | 0<br>.<br>7<br>6      | 0<br>.<br>5<br>3<br>8 | 2.<br>3<br>3<br>E<br>-<br>0<br>6 | 0.<br>1 |  | 1 | 1 | 6 | 20<br>13 | 2<br>0<br>1<br>3 |
| Rh<br>eu<br>ma<br>toi<br>d<br>Ar<br>thr<br>itis | C<br>00<br>03<br>87<br>3 | KIF<br>26<br>B       | 5<br>5<br>0<br>8<br>3 | Q2KJ<br>Y2 | kinesin<br>family<br>member<br>26B                     | Ce<br>llul<br>ar<br>str<br>uct<br>ure | 38 | 0<br>.<br>6<br>7      | 0<br>.<br>5<br>9      | 0.<br>9<br>9<br>9<br>9           | 0.<br>1 |  | 1 | 1 | 1 | 20<br>19 | 2<br>0<br>1<br>9 |
| Rh<br>eu<br>ma<br>toi<br>d<br>Ar<br>thr<br>itis | C<br>00<br>03<br>87<br>3 | PP<br>P1<br>R1<br>0  | 5<br>5<br>1<br>4      | Q96Q<br>C0 | protein<br>phosphatase 1<br>regulatory<br>subunit 10   |                                       | 22 | 0<br>.<br>7<br>5<br>1 | 0<br>.<br>4<br>2<br>3 | 1                                | 0.<br>1 |  | 1 | 1 | 1 | 20<br>09 | 2<br>0<br>0<br>9 |
| Rh<br>eu<br>ma<br>toi<br>d<br>Ar<br>thr<br>itis | C<br>00<br>03<br>87<br>3 | AC<br>OX<br>L        | 5<br>5<br>2<br>8<br>9 | Q9N<br>UZ1 | acyl-<br>CoA<br>oxidase<br>like                        | En<br>zy<br>me                        | 46 | 0<br>.<br>6<br>7<br>4 | 0<br>.<br>5<br>7<br>7 | 5.<br>2<br>5<br>E<br>-<br>1<br>5 | 0.<br>1 |  | 1 | 1 | 1 | 20<br>14 | 2<br>0<br>1<br>4 |
| Rh<br>eu<br>ma<br>toi<br>d<br>Ar<br>thr<br>itis | C<br>00<br>03<br>87<br>3 | TC<br>P11<br>L1      | 5<br>5<br>3<br>4<br>6 | Q9N<br>UJ3 | t-<br>complex<br>11 like 1                             | Re<br>ce<br>pto<br>r                  | 1  | 1                     | 0<br>.<br>1<br>1<br>5 | 0.<br>0<br>0<br>4<br>3<br>7      | 0.<br>1 |  | 1 | 1 | 1 | 20<br>13 | 2<br>0<br>1<br>3 |
| Rh<br>eu<br>ma<br>toi                           | C<br>00<br>03            | CD<br>K5<br>RA<br>P2 | 5<br>5<br>7           | Q96S<br>N8 | CDK5<br>regulatory<br>subunit                          |                                       | 42 | 0<br>.<br>6           | 0<br>.<br>5           | 4.<br>6<br>2<br>E                | 0.<br>1 |  | 1 | 1 | 1 | 20<br>14 | 2<br>0<br>1<br>4 |

|                                                 |                          |                |                       |            |                                                   |                   |          |                       |                       |                             |         |  |                   |    |   |          |                  |
|-------------------------------------------------|--------------------------|----------------|-----------------------|------------|---------------------------------------------------|-------------------|----------|-----------------------|-----------------------|-----------------------------|---------|--|-------------------|----|---|----------|------------------|
| d<br>Ar<br>thr<br>itis                          | 87<br>3                  |                | 5<br>5                |            | associated<br>protein 2                           |                   |          | 8<br>2                | 7<br>7                | -<br>2<br>3                 |         |  |                   |    |   |          |                  |
| Rh<br>eu<br>ma<br>toi<br>d<br>Ar<br>thr<br>itis | C<br>00<br>03<br>87<br>3 | ZN<br>F30<br>2 | 5<br>5<br>9<br>0<br>0 | Q9NR<br>11 | zinc finger<br>protein 302                        |                   | 1        | 1                     | 0<br>.<br>1<br>1<br>5 | 0.<br>0<br>0<br>1<br>9<br>4 | 0.<br>1 |  | 1                 | 1  | 1 | 20<br>11 | 2<br>0<br>1<br>1 |
| Rh<br>eu<br>ma<br>toi<br>d<br>Ar<br>thr<br>itis | C<br>00<br>03<br>87<br>3 | MA<br>PK<br>1  | 5<br>5<br>9<br>4      | P2848<br>2 | mitogen<br>-<br>activate<br>d protein<br>kinase 1 | Ki<br>nas<br>e    | 10<br>59 | 0<br>.<br>3<br>3      | 0<br>.<br>9<br>2<br>3 | 0.<br>9<br>9<br>6<br>9<br>8 | 0.<br>1 |  | 0.<br>9<br>7<br>6 | 42 | 0 | 20<br>00 | 2<br>0<br>2<br>0 |
| Rh<br>eu<br>ma<br>toi<br>d<br>Ar<br>thr<br>itis | C<br>00<br>03<br>87<br>3 | MA<br>PK<br>8  | 5<br>5<br>9<br>9      | P4598<br>3 | mitogen<br>-<br>activate<br>d protein<br>kinase 8 | Ki<br>nas<br>e    | 52<br>0  | 0<br>.<br>3<br>9<br>7 | 0<br>.<br>8<br>8<br>5 | 0.<br>9<br>9<br>8<br>2<br>3 | 0.<br>1 |  | 1                 | 14 | 0 | 20<br>04 | 2<br>0<br>1<br>8 |
| Rh<br>eu<br>ma<br>toi<br>d<br>Ar<br>thr<br>itis | C<br>00<br>03<br>87<br>3 | PR<br>L        | 5<br>6<br>1<br>7      | P0123<br>6 | prolactin                                         | Sig<br>nal<br>ing | 50<br>6  | 0<br>.<br>4<br>0<br>6 | 0<br>.<br>8<br>8<br>5 | 2.<br>9<br>E<br>-<br>0<br>7 | 0.<br>1 |  | 1                 | 13 | 1 | 19<br>96 | 2<br>0<br>1<br>9 |
| Rh<br>eu<br>ma<br>toi<br>d<br>Ar<br>thr<br>itis | C<br>00<br>03<br>87<br>3 | PR<br>TN<br>3  | 5<br>6<br>5<br>7      | P2415<br>8 | proteina<br>se 3                                  | En<br>zy<br>me    | 21<br>5  | 0<br>.<br>5<br>0<br>3 | 0<br>.<br>8<br>0<br>8 | 3.<br>8<br>E<br>-<br>0<br>5 | 0.<br>1 |  | 0.<br>9<br>4<br>7 | 38 | 0 | 19<br>99 | 2<br>0<br>2<br>0 |
| Rh<br>eu<br>ma<br>toi<br>d<br>Ar<br>thr<br>itis | C<br>00<br>03<br>87<br>3 | TRI<br>M3<br>9 | 5<br>6<br>6<br>5<br>8 | Q9HC<br>M9 | tripartite motif<br>containing 39                 |                   | 9        | 0<br>.<br>7<br>9<br>2 | 0<br>.<br>4<br>6<br>2 | 0.<br>9<br>9<br>4<br>7<br>4 | 0.<br>1 |  | 1                 | 1  | 1 | 20<br>09 | 2<br>0<br>0<br>9 |
| Rh<br>eu                                        | C<br>00                  | RE<br>TN       | 5<br>6                | Q9H<br>D89 | resistin                                          |                   | 30<br>2  | 0<br>.                | 0<br>.                | 0.<br>0                     | 0.<br>1 |  | 0.<br>8           | 12 | 3 | 20<br>05 | 2<br>0           |

|                      |          |         |        |        |                                        |                      |     |      |      |          |     |  |     |    |   |      |      |
|----------------------|----------|---------|--------|--------|----------------------------------------|----------------------|-----|------|------|----------|-----|--|-----|----|---|------|------|
| matoid Arthritis     | 03873    |         | 729    |        |                                        |                      |     | 454  | 808  | 36545    |     |  | 33  |    |   |      | 19   |
| Rheumatoid Arthritis | C0003873 | PSMA4   | 5685   | P25789 | proteasome 20S subunit alpha 4         |                      | 30  | 0716 | 0385 | 0.5959   | 0.1 |  | 1   | 1  | 1 | 2013 | 2013 |
| Rheumatoid Arthritis | C0003873 | PRDM10  | 56980  | Q9NQV6 | PR/SET domain 10                       | Transcription factor | 19  | 076  | 0385 | 0.13304  | 0.1 |  | 1   | 1  | 1 | 2019 | 2019 |
| Rheumatoid Arthritis | C0003873 | VAR2    | 57176  | Q5ST30 | valyl-tRNA synthetase 2, mitochondrial |                      | 37  | 0666 | 0577 | 5.83E-17 | 0.1 |  | 1   | 2  | 4 | 2007 | 2009 |
| Rheumatoid Arthritis | C0003873 | MIR499A | 574501 |        | microRNA 499a                          |                      | 156 | 059  | 0846 |          | 0.1 |  | 0.9 | 10 | 1 | 2011 | 2019 |
| Rheumatoid Arthritis | C0003873 | PRR12   | 57479  | Q9UL5  | proline rich 12                        |                      | 35  | 0716 | 0385 | 1        | 0.1 |  | 1   | 1  | 1 | 2019 | 2019 |
| Rheumatoid Arthritis | C0003873 | DENND1A | 57706  | Q8TEH3 | DENN domain containing 1A              |                      | 21  | 0736 | 0538 | 0.9976   | 0.1 |  | 1   | 1  | 1 | 2019 | 2019 |



|                      |          |         |       |        |                                      |                  |     |       |       |          |     |  |       |    |   |      |      |
|----------------------|----------|---------|-------|--------|--------------------------------------|------------------|-----|-------|-------|----------|-----|--|-------|----|---|------|------|
| Rheumatoid Arthritis | C0003873 | ANO8    | 57719 | Q9HCE9 | anoctamin 8                          |                  | 3   | 0.89  | 0.152 | 0.9634   | 0.1 |  | 1     | 1  | 1 | 2014 | 2014 |
| Rheumatoid Arthritis | C0003873 | NCOA5   | 57727 | Q9HCD5 | nuclear receptor coactivator 5       | Receptor         | 53  | 0.631 | 0.692 | 0.9926   | 0.1 |  | 1     | 11 | 0 | 2002 | 2020 |
| Rheumatoid Arthritis | C0003873 | C6orf47 | 57827 | O95873 | chromosome 6 open reading frame 47   |                  | 21  | 0.722 | 0.423 | 0.66412  | 0.1 |  | 1     | 3  | 2 | 2007 | 2011 |
| Rheumatoid Arthritis | C0003873 | LY6G5B  | 58496 | Q8NDX9 | lymphocyte antigen family member G5B | 6                | 3   | 0.931 | 0.12  | 8.18E-06 | 0.1 |  | 1     | 1  | 2 | 2011 | 2011 |
| Rheumatoid Arthritis | C0003873 | LY6G6D  | 58530 | O95868 | lymphocyte antigen family member G6D | 6                | 11  | 0.805 | 0.385 | 0.3254   | 0.1 |  | 1     | 3  | 2 | 2007 | 2011 |
| Rheumatoid Arthritis | C0003873 | IL21    | 59067 | Q9HBE4 | interleukin 21                       |                  | 321 | 0.441 | 0.769 | 0.6254   | 0.1 |  | 0.912 | 34 | 2 | 2004 | 2020 |
| Rheumatoid Ar        | C0003873 | RARA    | 5914  | P10276 | retinoic acid receptor alpha         | Nuclear receptor | 274 | 0.47  | 0.846 | 0.9605   | 0.1 |  | 1     | 10 | 0 | 1994 | 2019 |

|                                                 |                          |                |                  |            |                                                      |                                             |          |                       |                       |                             |         |  |   |    |   |          |                  |
|-------------------------------------------------|--------------------------|----------------|------------------|------------|------------------------------------------------------|---------------------------------------------|----------|-----------------------|-----------------------|-----------------------------|---------|--|---|----|---|----------|------------------|
| thr<br>itis                                     |                          |                |                  |            |                                                      |                                             |          |                       |                       |                             |         |  |   |    |   |          |                  |
| Rh<br>eu<br>ma<br>toi<br>d<br>Ar<br>thr<br>itis | C<br>00<br>03<br>87<br>3 | BC<br>L2       | 5<br>9<br>6      | P1041<br>5 | BCL2<br>apoptosi<br>s<br>regulato<br>r               | Sig<br>nal<br>ing                           | 14<br>56 | 0<br>.<br>2<br>9<br>1 | 0<br>.<br>8<br>8<br>5 | 0.<br>5<br>9<br>0<br>3      | 0.<br>1 |  | 1 | 22 | 1 | 19<br>94 | 2<br>0<br>1<br>9 |
| Rh<br>eu<br>ma<br>toi<br>d<br>Ar<br>thr<br>itis | C<br>00<br>03<br>87<br>3 | RE<br>LA       | 5<br>9<br>7<br>0 | Q042<br>06 | RELA<br>proto-<br>oncogen<br>e, NF-<br>kB<br>subunit | Tr<br>ans<br>cri<br>pti<br>on<br>fac<br>tor | 48<br>3  | 0<br>.<br>4<br>0<br>6 | 0<br>.<br>8<br>8<br>5 | 0.<br>9<br>9<br>4<br>8      | 0.<br>1 |  | 1 | 13 | 0 | 20<br>02 | 2<br>0<br>1<br>9 |
| Rh<br>eu<br>ma<br>toi<br>d<br>Ar<br>thr<br>itis | C<br>00<br>03<br>87<br>3 | AC<br>TB       | 6<br>0           | P6070<br>9 | actin<br>beta                                        | Ce<br>llul<br>ar<br>str<br>uct<br>ure       | 11<br>10 | 0<br>.<br>3<br>2<br>5 | 0<br>.<br>9<br>2<br>3 | 0.<br>9<br>8<br>5<br>6<br>4 | 0.<br>1 |  | 1 | 11 | 0 | 19<br>91 | 2<br>0<br>1<br>9 |
| Rh<br>eu<br>ma<br>toi<br>d<br>Ar<br>thr<br>itis | C<br>00<br>03<br>87<br>3 | RIT<br>2       | 6<br>0<br>1<br>4 | Q995<br>78 | Ras like<br>without<br>CAAX 2                        | En<br>zy<br>me<br>mo<br>dul<br>ato<br>r     | 46       | 0<br>.<br>6<br>4<br>7 | 0<br>.<br>5<br>3<br>8 | 0.<br>0<br>0<br>6<br>3<br>2 | 0.<br>1 |  | 1 | 1  | 1 | 20<br>13 | 2<br>0<br>1<br>3 |
| Rh<br>eu<br>ma<br>toi<br>d<br>Ar<br>thr<br>itis | C<br>00<br>03<br>87<br>3 | RN<br>F5       | 6<br>0<br>4<br>8 | Q999<br>42 | ring<br>finger<br>protein 5                          | En<br>zy<br>me                              | 28       | 0<br>.<br>7<br>1<br>6 | 0<br>.<br>5<br>3<br>8 | 3.<br>7<br>E<br>-<br>0<br>5 | 0.<br>1 |  | 1 | 3  | 7 | 20<br>07 | 2<br>0<br>1<br>1 |
| Rh<br>eu<br>ma<br>toi<br>d<br>Ar<br>thr<br>itis | C<br>00<br>03<br>87<br>3 | RP<br>L37<br>A | 6<br>1<br>6<br>8 | P6151<br>3 | ribosomal<br>protein L37a                            |                                             | 8        | 0<br>.<br>8<br>3<br>9 | 0<br>.<br>3<br>4<br>6 | 0.<br>0<br>5<br>1<br>2<br>6 | 0.<br>1 |  | 1 | 1  | 1 | 20<br>16 | 2<br>0<br>1<br>6 |
| Rh<br>eu<br>ma<br>toi                           | C<br>00<br>03            | RP<br>S18      | 6<br>2<br>2<br>2 | P6226<br>9 | ribosom<br>al<br>protein<br>S18                      | Nu<br>cle<br>ic<br>aci                      | 7        | 0<br>.<br>8           | 0<br>.<br>1           | 0.<br>9<br>7                | 0.<br>1 |  | 1 | 1  | 1 | 20<br>09 | 2<br>0<br>0<br>9 |

|                                                 |                          |                |                  |            |                                             |                                                            |          |                       |                       |                                  |         |  |                   |    |   |          |                  |
|-------------------------------------------------|--------------------------|----------------|------------------|------------|---------------------------------------------|------------------------------------------------------------|----------|-----------------------|-----------------------|----------------------------------|---------|--|-------------------|----|---|----------|------------------|
| d<br>Ar<br>thr<br>itis                          | 87<br>3                  |                |                  |            |                                             | d<br>bin<br>din<br>g                                       |          | 6<br>1                | 9<br>2                | 5<br>9                           |         |  |                   |    |   |          |                  |
| Rh<br>eu<br>ma<br>toi<br>d<br>Ar<br>thr<br>itis | C<br>00<br>03<br>87<br>3 | RP<br>S19      | 6<br>2<br>2<br>3 | P3901<br>9 | ribosom<br>al<br>protein<br>S19             | Nu<br>cle<br>ic<br>aci<br>d<br>bin<br>din<br>g             | 25<br>6  | 0<br>.<br>4<br>8      | 0<br>.<br>8<br>4<br>6 | 0.<br>9<br>2<br>1<br>1           | 0.<br>1 |  | 1                 | 11 | 0 | 20<br>06 | 2<br>0<br>2<br>0 |
| Rh<br>eu<br>ma<br>toi<br>d<br>Ar<br>thr<br>itis | C<br>00<br>03<br>87<br>3 | S10<br>0A<br>8 | 6<br>2<br>7<br>9 | P0510<br>9 | S100<br>calcium<br>binding<br>protein<br>A8 | Ca<br>lci<br>um<br>-<br>bin<br>din<br>g<br>pro<br>tei<br>n | 36<br>9  | 0<br>.<br>4<br>3      | 0<br>.<br>9<br>6<br>2 | 0.<br>1<br>3<br>7<br>6<br>1      | 0.<br>1 |  | 0.<br>9<br>3<br>8 | 16 | 0 | 20<br>05 | 2<br>0<br>1<br>9 |
| Rh<br>eu<br>ma<br>toi<br>d<br>Ar<br>thr<br>itis | C<br>00<br>03<br>87<br>3 | SA<br>A1       | 6<br>2<br>8<br>8 | P0DJ1<br>8 | serum<br>amyloid<br>A1                      | Tr<br>ans<br>por<br>ter                                    | 18<br>8  | 0<br>.<br>5<br>1<br>3 | 0<br>.<br>8<br>0<br>8 | 0.<br>0<br>1<br>4<br>9<br>3      | 0.<br>1 |  | 0.<br>9<br>4<br>1 | 17 | 0 | 19<br>86 | 2<br>0<br>1<br>9 |
| Rh<br>eu<br>ma<br>toi<br>d<br>Ar<br>thr<br>itis | C<br>00<br>03<br>87<br>3 | VP<br>S52      | 6<br>2<br>9<br>3 | Q8N1<br>B4 | VPS52<br>subunit<br>of<br>GARP<br>complex   | Tr<br>ans<br>por<br>ter                                    | 11       | 0<br>.<br>7<br>8      | 0<br>.<br>2<br>3<br>1 | 0.<br>0<br>0<br>0<br>3<br>8<br>9 | 0.<br>1 |  | 1                 | 2  | 2 | 20<br>07 | 2<br>0<br>0<br>9 |
| Rh<br>eu<br>ma<br>toi<br>d<br>Ar<br>thr<br>itis | C<br>00<br>03<br>87<br>3 | CC<br>L2       | 6<br>3<br>4<br>7 | P1350<br>0 | C-C<br>motif<br>chemoki<br>ne<br>ligand 2   | Sig<br>nal<br>ing                                          | 11<br>57 | 0<br>.<br>3<br>2<br>1 | 0<br>.<br>9<br>6<br>2 | 0.<br>6<br>0<br>7<br>8<br>6      | 0.<br>1 |  | 0.<br>9<br>4<br>2 | 52 | 0 | 19<br>92 | 2<br>0<br>1<br>9 |
| Rh<br>eu<br>ma<br>toi<br>d<br>Ar<br>thr<br>itis | C<br>00<br>03<br>87<br>3 | CC<br>L5       | 6<br>3<br>5<br>2 | P1350<br>1 | C-C<br>motif<br>chemoki<br>ne<br>ligand 5   | Sig<br>nal<br>ing                                          | 51<br>4  | 0<br>.<br>4<br>0<br>3 | 0<br>.<br>8<br>8<br>5 | 0.<br>0<br>1<br>7<br>5<br>2      | 0.<br>1 |  | 0.<br>9<br>6<br>2 | 26 | 0 | 19<br>93 | 2<br>0<br>1<br>9 |

|                      |          |             |       |        |                                                        |                         |     |       |       |          |     |  |       |    |   |      |      |
|----------------------|----------|-------------|-------|--------|--------------------------------------------------------|-------------------------|-----|-------|-------|----------|-----|--|-------|----|---|------|------|
| Rheumatoid Arthritis | C0003873 | CC L20      | 6364  | P78556 | C-C motif chemokine ligand 20                          | Signaling               | 242 | 0.474 | 0.846 | 0.0242   | 0.1 |  | 1     | 15 | 0 | 2001 | 2020 |
| Rheumatoid Arthritis | C0003873 | CXCL12      | 6387  | P48061 | C-X-C motif chemokine ligand 12                        |                         | 626 | 0.379 | 0.846 | 0.11851  | 0.1 |  | 0.913 | 23 | 0 | 2000 | 2019 |
| Rheumatoid Arthritis | C0003873 | PRDM16      | 63976 | Q9HAZ2 | PR/SET domain 16                                       |                         | 200 | 0.522 | 0.899 | 0.9999   | 0.1 |  | 1     | 1  | 1 | 2019 | 2019 |
| Rheumatoid Arthritis | C0003873 | SELE        | 6401  | P16581 | selectin E                                             |                         | 327 | 0.447 | 0.808 | 7.91E-10 | 0.1 |  | 0.917 | 12 | 0 | 1991 | 2020 |
| Rheumatoid Arthritis | C0003873 | CLSTN2      | 64084 | Q9HD0  | calsynectin 2                                          | Calcium-binding protein | 25  | 0.716 | 0.423 | 3.52E-06 | 0.1 |  | 1     | 1  | 1 | 2009 | 2009 |
| Rheumatoid Arthritis | C0003873 | NO D2       | 64127 | Q9HC29 | nucleotide binding oligomerization domain containing 2 | Enzyme                  | 434 | 0.423 | 0.923 | 1.98E-30 | 0.1 |  | 0.818 | 11 | 1 | 2003 | 2019 |
| Rheumatoid           | C0003    | LI NC 00452 | 64333 |        | long intergenic non-protein                            |                         | 2   | 1     | 0.1   |          | 0.1 |  | 1     | 1  | 3 | 2013 | 2013 |

|                                                 |                          |                      |                            |            |                                                                                     |                |         |                       |                       |                                  |         |   |    |    |          |                  |                  |
|-------------------------------------------------|--------------------------|----------------------|----------------------------|------------|-------------------------------------------------------------------------------------|----------------|---------|-----------------------|-----------------------|----------------------------------|---------|---|----|----|----------|------------------|------------------|
| d<br>Ar<br>thr<br>itis                          | 87<br>3                  |                      | 6<br>5                     |            | coding RNA<br>452                                                                   |                |         |                       | 1<br>5                |                                  |         |   |    |    |          |                  |                  |
| Rh<br>eu<br>ma<br>toi<br>d<br>Ar<br>thr<br>itis | C<br>00<br>03<br>87<br>3 | HL<br>A-<br>DP<br>A2 | 6<br>4<br>6<br>7<br>0<br>2 |            | major<br>histocompatib<br>ility complex,<br>class II, DP<br>alpha 2<br>(pseudogene) |                | 10      | 0<br>.<br>7<br>8      | 0<br>.<br>5<br>3<br>8 | 0.<br>1                          |         | 1 | 3  | 7  | 20<br>07 | 2<br>0<br>1<br>1 |                  |
| Rh<br>eu<br>ma<br>toi<br>d<br>Ar<br>thr<br>itis | C<br>00<br>03<br>87<br>3 | GO<br>RA<br>SP1      | 6<br>4<br>6<br>8<br>9      | Q9BQ<br>Q3 | golgi<br>reassembly<br>stacking<br>protein 1                                        |                | 36<br>9 | 0<br>.<br>4<br>2<br>8 | 0<br>.<br>8<br>4<br>6 | 0.<br>0<br>1<br>9<br>5<br>4<br>3 | 0.<br>1 |   | 1  | 12 | 0        | 20<br>02         | 2<br>0<br>1<br>9 |
| Rh<br>eu<br>ma<br>toi<br>d<br>Ar<br>thr<br>itis | C<br>00<br>03<br>87<br>3 | SKI<br>V2<br>L       | 6<br>4<br>9<br>9           | Q154<br>77 | Ski2 like RNA<br>helicase                                                           |                | 96      | 0<br>.<br>6<br>1<br>5 | 0<br>.<br>6<br>5<br>4 | 1.<br>2<br>9<br>E<br>-<br>2<br>2 | 0.<br>1 |   | 1  | 3  | 6        | 20<br>07         | 2<br>0<br>1<br>1 |
| Rh<br>eu<br>ma<br>toi<br>d<br>Ar<br>thr<br>itis | C<br>00<br>03<br>87<br>3 | W<br>NK<br>1         | 6<br>5<br>1<br>2<br>5      | Q9H4<br>A3 | WNK<br>lysine<br>deficient<br>protein<br>kinase 1                                   | Ki<br>nas<br>e | 46<br>0 | 0<br>.<br>4<br>1<br>6 | 0<br>.<br>8<br>4<br>6 | 1<br>0.<br>1                     |         | 1 | 12 | 0  | 20<br>02 | 2<br>0<br>1<br>9 |                  |
| Rh<br>eu<br>ma<br>toi<br>d<br>Ar<br>thr<br>itis | C<br>00<br>03<br>87<br>3 | PC<br>DH<br>15       | 6<br>5<br>2<br>1<br>7      | Q96Q<br>U1 | protocadherin<br>related 15                                                         |                | 94      | 0<br>.<br>6<br>0<br>1 | 0<br>.<br>5<br>7<br>7 | 8.<br>0<br>3<br>E<br>-<br>2<br>5 | 0.<br>1 |   | 1  | 1  | 1        | 20<br>13         | 2<br>0<br>1<br>3 |
| Rh<br>eu<br>ma<br>toi<br>d<br>Ar<br>thr<br>itis | C<br>00<br>03<br>87<br>3 | CA<br>ST<br>OR<br>1  | 6<br>5<br>2<br>9<br>6<br>8 | Q8W<br>TX7 | cytosolic<br>arginine<br>sensor for<br>mTORC1<br>subunit 1                          |                | 10      | 0<br>.<br>8<br>2<br>1 | 0<br>.<br>2<br>3<br>1 | 0.<br>0<br>2<br>7<br>5<br>3<br>3 | 0.<br>1 |   | 1  | 1  | 1        | 20<br>14         | 2<br>0<br>1<br>4 |
| Rh<br>eu                                        | C<br>00                  | SL<br>C6             | 6<br>5                     | P4806<br>6 | solute<br>carrier                                                                   | Tr<br>ans      | 21      | 0<br>.                | 0<br>.                | 4.<br>8                          | 0.<br>1 |   | 1  | 1  | 1        | 20<br>13         | 2<br>0           |

|                      |          |         |        |        |                                                    |                      |      |       |       |          |     |  |       |    |   |      |      |
|----------------------|----------|---------|--------|--------|----------------------------------------------------|----------------------|------|-------|-------|----------|-----|--|-------|----|---|------|------|
| matoid Arthritis     | 03873    | A11     | 38     |        | family 6 member 11                                 | porter               |      | 716   | 462   | 3E-05    |     |  |       |    |   |      | 13   |
| Rheumatoid Arthritis | C0003873 | SLC19A1 | 6573   | P41440 | solute carrier family 19 member 1                  | Transporter          | 155  | 0.523 | 0.62  | 6.47E-06 | 0.1 |  | 1     | 16 | 7 | 2004 | 2019 |
| Rheumatoid Arthritis | C0003873 | SOAT1   | 6646   | P35610 | sterol O-acyltransferase 1                         | Enzyme               | 389  | 0.424 | 0.846 | 7.36E-10 | 0.1 |  | 1     | 10 | 0 | 2011 | 2019 |
| Rheumatoid Arthritis | C0003873 | SPPI    | 6696   | P10451 | secreted phosphoprotein 1                          |                      | 824  | 0.353 | 0.85  | 2.15E-06 | 0.1 |  | 0.923 | 26 | 2 | 2000 | 2019 |
| Rheumatoid Arthritis | C0003873 | STAT3   | 6774   | P40763 | signal transducer and activator of transcription 3 | Nuclear acid binding | 1193 | 0.32  | 0.923 | 1        | 0.1 |  | 0.978 | 45 | 0 | 2001 | 2020 |
| Rheumatoid Arthritis | C0003873 | SNORA38 | 677820 |        | small nucleolar RNA, H/ACA box 38                  |                      | 6    | 0.89  | 0.154 |          | 0.1 |  | 1     | 1  | 2 | 2011 | 2011 |
| Rheumatoid Arthritis | C0003873 | BSG     | 682    | P35613 | basigin (Ok blood group)                           |                      | 287  | 0.458 | 0.769 | 2.59E-05 | 0.1 |  | 1     | 13 | 0 | 2000 | 2019 |

|                      |          |             |      |        |                                                         |             |     |       |       |         |     |  |       |    |   |      |      |
|----------------------|----------|-------------|------|--------|---------------------------------------------------------|-------------|-----|-------|-------|---------|-----|--|-------|----|---|------|------|
| Rheumatoid Arthritis | C0003873 | SUOX        | 6821 | P51687 | sulfite oxidase                                         |             | 67  | 0.638 | 0.615 | 9.4E-07 | 0.1 |  | 1     | 2  | 1 | 2014 | 2019 |
| Rheumatoid Arthritis | C0003873 | SYT1        | 6857 | P21579 | synaptotagmin 1                                         | Transporter | 460 | 0.412 | 0.846 | 0.6038  | 0.1 |  | 1     | 12 | 0 | 2002 | 2019 |
| Rheumatoid Arthritis | C0003873 | TAPP        | 6892 | O15533 | TAP binding protein                                     | Receptor    | 86  | 0.576 | 0.769 | 6.6E-09 | 0.1 |  | 1     | 1  | 6 | 2011 | 2011 |
| Rheumatoid Arthritis | C0003873 | BT F3P11    | 690  |        | basic transcription factor 3 pseudogene 11              |             | 154 | 0.519 | 0.731 |         | 0.1 |  | 0.941 | 17 | 0 | 2004 | 2019 |
| Rheumatoid Arthritis | C0003873 | TCF19       | 6941 | Q9Y242 | transcription factor 19                                 |             | 33  | 0.674 | 0.692 | 0.00938 | 0.1 |  | 1     | 1  | 1 | 2009 | 2009 |
| Rheumatoid Arthritis | C0003873 | BT K        | 695  | Q06187 | Bruton tyrosine kinase                                  | Kinase      | 290 | 0.464 | 0.808 | 0.9996  | 0.1 |  | 1     | 23 | 0 | 2009 | 2019 |
| Rheumatoid Ar        | C0003873 | TRBV20OR9-2 | 6962 |        | T cell receptor beta variable 20/OR9-2 (non-functional) |             | 456 | 0.403 | 0.923 |         | 0.1 |  | 0.88  | 25 | 0 | 1989 | 2019 |

|                                                 |                          |                      |                  |            |                                                |                                         |          |                       |                       |                                  |         |  |                   |    |   |          |                  |
|-------------------------------------------------|--------------------------|----------------------|------------------|------------|------------------------------------------------|-----------------------------------------|----------|-----------------------|-----------------------|----------------------------------|---------|--|-------------------|----|---|----------|------------------|
| thr<br>itis                                     |                          |                      |                  |            |                                                |                                         |          |                       |                       |                                  |         |  |                   |    |   |          |                  |
| Rh<br>eu<br>ma<br>toi<br>d<br>Ar<br>thr<br>itis | C<br>00<br>03<br>87<br>3 | TE<br>C              | 7<br>0<br>0<br>6 | P4268<br>0 | tec<br>protein<br>tyrosine<br>kinase           | Ki<br>nas<br>e                          | 1        | 1                     | 0<br>.<br>1<br>1<br>5 |                                  | 0.<br>1 |  | 1                 | 1  | 1 | 20<br>14 | 2<br>0<br>1<br>4 |
| Rh<br>eu<br>ma<br>toi<br>d<br>Ar<br>thr<br>itis | C<br>00<br>03<br>87<br>3 | TG<br>FB<br>1        | 7<br>0<br>4<br>0 | P0113<br>7 | transfor<br>ming<br>growth<br>factor<br>beta 1 | Sig<br>nal<br>ing                       | 15<br>58 | 0<br>.<br>2<br>8<br>7 | 0<br>.<br>9<br>6<br>2 | 0.<br>0<br>3<br>6<br>8<br>5      | 0.<br>1 |  | 0.<br>9<br>4<br>6 | 37 | 3 | 19<br>90 | 2<br>0<br>1<br>9 |
| Rh<br>eu<br>ma<br>toi<br>d<br>Ar<br>thr<br>itis | C<br>00<br>03<br>87<br>3 | TI<br>MP<br>1        | 7<br>0<br>7<br>6 | P0103<br>3 | TIMP<br>metallo<br>peptidase<br>inhibitor<br>1 | En<br>zy<br>me<br>mo<br>dul<br>ato<br>r | 60<br>3  | 0<br>.<br>3<br>8      | 0<br>.<br>8<br>8<br>5 | 0.<br>4<br>9<br>9<br>3           | 0.<br>1 |  | 1                 | 13 | 0 | 19<br>94 | 2<br>0<br>1<br>9 |
| Rh<br>eu<br>ma<br>toi<br>d<br>Ar<br>thr<br>itis | C<br>00<br>03<br>87<br>3 | TL<br>R3             | 7<br>0<br>9<br>8 | O154<br>55 | toll like<br>receptor<br>3                     | Re<br>ce<br>pto<br>r                    | 39<br>3  | 0<br>.<br>4<br>2<br>7 | 0<br>.<br>8<br>8<br>5 | 1.<br>6<br>3<br>E<br>-<br>0<br>7 | 0.<br>1 |  | 1                 | 10 | 0 | 20<br>05 | 2<br>0<br>1<br>8 |
| Rh<br>eu<br>ma<br>toi<br>d<br>Ar<br>thr<br>itis | C<br>00<br>03<br>87<br>3 | TL<br>R4             | 7<br>0<br>9<br>9 | O002<br>06 | toll like<br>receptor 4                        |                                         | 11<br>74 | 0<br>.<br>3<br>2<br>1 | 0<br>.<br>9<br>6<br>2 | 4.<br>6<br>1<br>E<br>-<br>0<br>9 | 0.<br>1 |  | 0.<br>9<br>1<br>8 | 61 | 5 | 20<br>03 | 2<br>0<br>2<br>0 |
| Rh<br>eu<br>ma<br>toi<br>d<br>Ar<br>thr<br>itis | C<br>00<br>03<br>87<br>3 | TN<br>FR<br>SF1<br>A | 7<br>1<br>3<br>2 | P1943<br>8 | TNF receptor<br>superfamily<br>member 1A       |                                         | 48<br>7  | 0<br>.<br>4<br>0<br>9 | 0<br>.<br>9<br>2<br>3 | 0.<br>9<br>9<br>4<br>9           | 0.<br>1 |  | 0.<br>8<br>8<br>5 | 26 | 7 | 19<br>92 | 2<br>0<br>2<br>0 |
| Rh<br>eu<br>ma<br>toi                           | C<br>00<br>03            | TN<br>FR<br>SF1<br>B | 7<br>1<br>3<br>3 | P2033<br>3 | TNF receptor<br>superfamily<br>member 1B       |                                         | 41<br>7  | 0<br>.<br>4           | 0<br>.<br>8           | 0.<br>5<br>0<br>2                | 0.<br>1 |  | 0.<br>8<br>1<br>2 | 32 | 1 | 19<br>92 | 2<br>0<br>2<br>0 |



|                                                 |                          |                |                            |            |                                                   |                                             |          |                       |                       |                             |         |  |                   |    |   |          |                  |
|-------------------------------------------------|--------------------------|----------------|----------------------------|------------|---------------------------------------------------|---------------------------------------------|----------|-----------------------|-----------------------|-----------------------------|---------|--|-------------------|----|---|----------|------------------|
| d<br>Ar<br>thr<br>itis                          | 87<br>3                  |                |                            |            |                                                   |                                             | 2<br>5   | 8<br>5                | 0<br>1                |                             |         |  |                   |    |   |          |                  |
| Rh<br>eu<br>ma<br>toi<br>d<br>Ar<br>thr<br>itis | C<br>00<br>03<br>87<br>3 | TP<br>53       | 7<br>1<br>5<br>7           | P0463<br>7 | tumor<br>protein<br>p53                           | Tr<br>ans<br>cri<br>pti<br>on<br>fac<br>tor | 24<br>94 | 0<br>.<br>2<br>3<br>6 | 0<br>.<br>9<br>6<br>2 | 0.<br>5<br>3<br>2<br>3<br>5 | 0.<br>1 |  | 0.<br>8<br>9<br>1 | 46 | 5 | 19<br>96 | 2<br>0<br>1<br>8 |
| Rh<br>eu<br>ma<br>toi<br>d<br>Ar<br>thr<br>itis | C<br>00<br>03<br>87<br>3 | TR<br>PS1      | 7<br>2<br>2<br>7           | Q9U<br>HF7 | transcriptional<br>repressor<br>GATA<br>binding 1 |                                             | 24<br>8  | 0<br>.<br>5<br>3<br>7 | 0<br>.<br>7<br>6<br>9 | 1                           | 0.<br>1 |  | 1                 | 1  | 1 | 20<br>13 | 2<br>0<br>1<br>3 |
| Rh<br>eu<br>ma<br>toi<br>d<br>Ar<br>thr<br>itis | C<br>00<br>03<br>87<br>3 | DC<br>DC<br>2C | 7<br>2<br>8<br>5<br>9<br>7 | A8M<br>YV0 | doublecortin<br>domain<br>containing 2C           |                                             | 2        | 0<br>.<br>9<br>3<br>1 | 0<br>.<br>1<br>9<br>2 | 0.<br>0<br>0<br>7<br>1<br>7 | 0.<br>1 |  | 1                 | 1  | 1 | 20<br>13 | 2<br>0<br>1<br>3 |
| Rh<br>eu<br>ma<br>toi<br>d<br>Ar<br>thr<br>itis | C<br>00<br>03<br>87<br>3 | TY<br>MS       | 7<br>2<br>9<br>8           | P0481<br>8 | thymidy<br>late<br>synthetase                     | En<br>zy<br>me                              | 40<br>6  | 0<br>.<br>4<br>2<br>5 | 0<br>.<br>8<br>4<br>6 | 0.<br>7<br>2<br>4<br>7      | 0.<br>1 |  | 1                 | 10 | 1 | 20<br>03 | 2<br>0<br>1<br>8 |
| Rh<br>eu<br>ma<br>toi<br>d<br>Ar<br>thr<br>itis | C<br>00<br>03<br>87<br>3 | VA<br>RS<br>1  | 7<br>4<br>0<br>7           | P2664<br>0 | valyl-tRNA<br>synthetase 1                        |                                             | 36       | 0<br>.<br>7<br>1<br>1 | 0<br>.<br>5           | 1.<br>8<br>E<br>-<br>0<br>8 | 0.<br>1 |  | 1                 | 1  | 1 | 20<br>11 | 2<br>0<br>1<br>1 |
| Rh<br>eu<br>ma<br>toi<br>d<br>Ar<br>thr<br>itis | C<br>00<br>03<br>87<br>3 | VC<br>AM<br>1  | 7<br>4<br>1<br>2           | P1932<br>0 | vascular cell<br>adhesion<br>molecule 1           |                                             | 40<br>6  | 0<br>.<br>4<br>2<br>2 | 0<br>.<br>8<br>0<br>8 | 0.<br>7<br>9<br>7<br>9<br>1 | 0.<br>1 |  | 1                 | 27 | 1 | 19<br>95 | 2<br>0<br>2<br>0 |

|                      |          |         |      |        |                                             |                  |     |       |       |          |     |  |       |    |   |      |      |
|----------------------|----------|---------|------|--------|---------------------------------------------|------------------|-----|-------|-------|----------|-----|--|-------|----|---|------|------|
| Rheumatoid Arthritis | C0003873 | VD R    | 7421 | P11473 | vitamin D receptor                          | Nuclear receptor | 852 | 0.352 | 0.885 | 1.68E-05 | 0.1 |  | 0.96  | 25 | 6 | 1998 | 2019 |
| Rheumatoid Arthritis | C0003873 | VIM     | 7431 | P08670 | vimentin                                    |                  | 644 | 0.372 | 0.846 | 0.71255  | 0.1 |  | 0.973 | 37 | 0 | 2004 | 2020 |
| Rheumatoid Arthritis | C0003873 | VIP     | 7432 | P01282 | vasoactive intestinal peptide               | Signaling        | 376 | 0.437 | 0.846 | 0.0042   | 0.1 |  | 1     | 16 | 0 | 1998 | 2019 |
| Rheumatoid Arthritis | C0003873 | TRIM26  | 7766 | Q12899 | tripartite motif containing 26              |                  | 31  | 0.705 | 0.577 | 0.1836   | 0.1 |  | 1     | 2  | 1 | 2007 | 2009 |
| Rheumatoid Arthritis | C0003873 | ZNF175  | 7728 | Q9Y473 | zinc finger protein 175                     |                  | 7   | 0.821 | 0.231 | 1.27E-07 | 0.1 |  | 1     | 1  | 1 | 2013 | 2013 |
| Rheumatoid Arthritis | C0003873 | ZSCAN26 | 7741 | Q16670 | zinc finger and SCAN domain containing 26   |                  | 2   | 0.931 | 0.115 |          | 0.1 |  | 1     | 1  | 1 | 2009 | 2009 |
| Rheumatoid Ar        | C0003873 | DDR1    | 780  | Q08345 | discoidin domain receptor tyrosine kinase 1 | Kinase           | 195 | 0.497 | 0.808 | 4.63E-   | 0.1 |  | 1     | 2  | 1 | 2007 | 2009 |

|                                                 |                          |                     |                       |            |                                                                         |                                                              |         |                       |                       |                                  |         |  |   |   |    |          |                  |
|-------------------------------------------------|--------------------------|---------------------|-----------------------|------------|-------------------------------------------------------------------------|--------------------------------------------------------------|---------|-----------------------|-----------------------|----------------------------------|---------|--|---|---|----|----------|------------------|
| thr<br>itis                                     |                          |                     |                       |            |                                                                         |                                                              |         |                       | 0<br>6                |                                  |         |  |   |   |    |          |                  |
| Rh<br>eu<br>ma<br>toi<br>d<br>Ar<br>thr<br>itis | C<br>00<br>03<br>87<br>3 | DD<br>A1            | 7<br>9<br>0<br>1<br>6 | Q9B<br>W61 | DET1 and<br>DDB1<br>associated 1                                        |                                                              | 17      | 0<br>.<br>7<br>3<br>6 | 0<br>.<br>3<br>0<br>8 | 0.<br>9<br>3<br>7<br>1<br>8      | 0.<br>1 |  | 1 | 1 | 1  | 20<br>14 | 2<br>0<br>1<br>4 |
| Rh<br>eu<br>ma<br>toi<br>d<br>Ar<br>thr<br>itis | C<br>00<br>03<br>87<br>3 | FT<br>O             | 7<br>9<br>0<br>6<br>8 | Q9C0<br>B1 | FTO alpha-<br>ketoglutarate<br>dependent<br>dioxygenase                 |                                                              | 28<br>6 | 0<br>.<br>4<br>8<br>6 | 0<br>.<br>8<br>8<br>5 | 8.<br>3<br>6<br>E<br>-<br>0<br>8 | 0.<br>1 |  | 1 | 1 | 1  | 20<br>18 | 2<br>0<br>1<br>8 |
| Rh<br>eu<br>ma<br>toi<br>d<br>Ar<br>thr<br>itis | C<br>00<br>03<br>87<br>3 | BA<br>G6            | 7<br>9<br>1<br>7      | P4637<br>9 | BAG<br>cochape<br>rone 6                                                | En<br>zy<br>me<br>mo<br>dul<br>ato<br>r                      | 40      | 0<br>.<br>6<br>7<br>4 | 0<br>.<br>6<br>1<br>5 | 1                                | 0.<br>1 |  | 1 | 3 | 12 | 20<br>07 | 2<br>0<br>1<br>1 |
| Rh<br>eu<br>ma<br>toi<br>d<br>Ar<br>thr<br>itis | C<br>00<br>03<br>87<br>3 | GP<br>AN<br>K1      | 7<br>9<br>1<br>8      | O958<br>72 | G-patch<br>domain and<br>ankyrin<br>repeats 1                           |                                                              | 12      | 0<br>.<br>7<br>6<br>9 | 0<br>.<br>3<br>8<br>5 | 3.<br>2<br>4<br>E<br>-<br>0<br>7 | 0.<br>1 |  | 1 | 3 | 3  | 20<br>07 | 2<br>0<br>1<br>1 |
| Rh<br>eu<br>ma<br>toi<br>d<br>Ar<br>thr<br>itis | C<br>00<br>03<br>87<br>3 | HS<br>D1<br>7B<br>8 | 7<br>9<br>2<br>3      | Q925<br>06 | hydroxy<br>steroid<br>17-beta<br>dehydro<br>genase 8                    | En<br>zy<br>me                                               | 9       | 0<br>.<br>8<br>0<br>5 | 0<br>.<br>3<br>4<br>6 | 3.<br>6<br>9<br>E<br>-<br>0<br>5 | 0.<br>1 |  | 1 | 2 | 2  | 20<br>07 | 2<br>0<br>0<br>9 |
| Rh<br>eu<br>ma<br>toi<br>d<br>Ar<br>thr<br>itis | C<br>00<br>03<br>87<br>3 | OR<br>2H<br>2       | 7<br>9<br>3<br>2      | O959<br>18 | olfactor<br>y<br>receptor<br>family 2<br>subfamil<br>y H<br>member<br>2 | G-<br>pro<br>tei<br>n<br>co<br>upl<br>ed<br>rec<br>ept<br>or | 1       | 1                     | 0<br>.<br>1<br>1<br>5 | 1.<br>9<br>1<br>E<br>-<br>0<br>5 | 0.<br>1 |  | 1 | 1 | 2  | 20<br>09 | 2<br>0<br>0<br>9 |
| Rh<br>eu                                        | C<br>00                  | RN<br>AS            | 7<br>9                | Q5TB<br>B1 | ribonuclease<br>H2 subunit B                                            |                                                              | 11<br>5 | 0<br>.<br>.           | 0<br>.<br>.           | 3.<br>2                          | 0.<br>1 |  | 1 | 1 | 1  | 20<br>15 | 2<br>0           |

|                                                 |                          |               |                       |            |                                                                                            |                |             |                       |                       |                                  |         |  |                   |    |   |          |                  |
|-------------------------------------------------|--------------------------|---------------|-----------------------|------------|--------------------------------------------------------------------------------------------|----------------|-------------|-----------------------|-----------------------|----------------------------------|---------|--|-------------------|----|---|----------|------------------|
| ma<br>toi<br>d<br>Ar<br>thr<br>itis             | 03<br>87<br>3            | EH<br>2B      | 6<br>2<br>1           |            |                                                                                            |                | 5<br>9<br>5 | 6<br>1<br>5           | 6<br>E<br>-<br>0<br>9 |                                  |         |  |                   |    |   | 1<br>5   |                  |
| Rh<br>eu<br>ma<br>toi<br>d<br>Ar<br>thr<br>itis | C<br>00<br>03<br>87<br>3 | AI<br>MP<br>2 | 7<br>9<br>6<br>5      | Q131<br>55 | aminoacyl<br>tRNA<br>synthetase<br>complex<br>interacting<br>multifunctiona<br>l protein 2 |                | 55<br>5     | 0<br>.<br>3<br>9<br>3 | 0<br>.<br>9<br>2<br>3 | 0.<br>0<br>8<br>0<br>2<br>4      | 0.<br>1 |  | 1                 | 23 | 0 | 20<br>03 | 2<br>0<br>1<br>9 |
| Rh<br>eu<br>ma<br>toi<br>d<br>Ar<br>thr<br>itis | C<br>00<br>03<br>87<br>3 | AG<br>BL<br>2 | 7<br>9<br>8<br>4<br>1 | Q5U5<br>Z8 | ATP/GT<br>P<br>binding<br>protein<br>like 2                                                | En<br>zy<br>me | 55          | 0<br>.<br>6<br>4<br>4 | 0<br>.<br>6<br>5<br>4 | 3.<br>9<br>6<br>E<br>-<br>1<br>6 | 0.<br>1 |  | 0.<br>8<br>8<br>5 | 26 | 1 | 20<br>07 | 2<br>0<br>2<br>0 |
| Rh<br>eu<br>ma<br>toi<br>d<br>Ar<br>thr<br>itis | C<br>00<br>03<br>87<br>3 | RP<br>P21     | 7<br>9<br>8<br>9<br>7 | Q9H6<br>33 | ribonucl<br>ease<br>P/MRP<br>subunit<br>p21                                                | En<br>zy<br>me | 5           | 0<br>.<br>8<br>3<br>9 | 0<br>.<br>2<br>6<br>9 | 4.<br>9<br>E<br>-<br>0<br>5      | 0.<br>1 |  | 1                 | 1  | 1 | 20<br>09 | 2<br>0<br>0<br>9 |
| Rh<br>eu<br>ma<br>toi<br>d<br>Ar<br>thr<br>itis | C<br>00<br>03<br>87<br>3 | AT<br>AT<br>1 | 7<br>9<br>9<br>6<br>9 | Q5SQ<br>I0 | alpha tubulin<br>acetyltransfera<br>se 1                                                   |                | 31          | 0<br>.<br>7           | 0<br>.<br>5           | 1.<br>3<br>2<br>E<br>-<br>0<br>7 | 0.<br>1 |  | 1                 | 2  | 1 | 20<br>07 | 2<br>0<br>0<br>9 |
| Rh<br>eu<br>ma<br>toi<br>d<br>Ar<br>thr<br>itis | C<br>00<br>03<br>87<br>3 | SP<br>SB<br>1 | 8<br>0<br>1<br>7<br>6 | Q96B<br>D6 | splA/ryanodin<br>e receptor<br>domain and<br>SOCS box<br>containing 1                      |                | 26          | 0<br>.<br>7<br>2<br>2 | 0<br>.<br>5<br>7<br>7 | 0.<br>5<br>1<br>9<br>8<br>2      | 0.<br>1 |  | 1                 | 1  | 1 | 20<br>13 | 2<br>0<br>1<br>3 |
| Rh<br>eu<br>ma<br>toi<br>d<br>Ar<br>thr<br>itis | C<br>00<br>03<br>87<br>3 | AL<br>PK<br>1 | 8<br>0<br>2<br>1<br>6 | Q96Q<br>P1 | alpha<br>kinase 1                                                                          | Ki<br>nas<br>e | 54          | 0<br>.<br>6<br>4<br>4 | 0<br>.<br>6<br>1<br>5 | 1.<br>0<br>2<br>E<br>-<br>1<br>9 | 0.<br>1 |  | 1                 | 1  | 1 | 20<br>19 | 2<br>0<br>1<br>9 |

|                      |          |          |       |        |                                                       |             |    |       |       |         |     |  |   |   |   |      |      |
|----------------------|----------|----------|-------|--------|-------------------------------------------------------|-------------|----|-------|-------|---------|-----|--|---|---|---|------|------|
| Rheumatoid Arthritis | C0003873 | CUL5     | 8065  | Q93034 | cullin 5                                              | Enzyme      | 32 | 0.691 | 0.577 | 1       | 0.1 |  | 1 | 1 | 1 | 2019 | 2019 |
| Rheumatoid Arthritis | C0003873 | SLC4A4   | 80736 | Q53GD3 | solute carrier family 44 member 4                     | Transporter | 39 | 0.678 | 0.615 | 1E-14   | 0.1 |  | 1 | 3 | 9 | 2007 | 2011 |
| Rheumatoid Arthritis | C0003873 | VWFA7    | 80737 | Q9Y334 | von Willebrand factor domain containing 7             | A           | 6  | 0.839 | 0.308 | 2E-11   | 0.1 |  | 1 | 1 | 3 | 2011 | 2011 |
| Rheumatoid Arthritis | C0003873 | LY6G6C   | 80740 | O95867 | lymphocyte antigen family member G6C                  | 6           | 7  | 0.821 | 0.385 | 0.0493  | 0.1 |  | 1 | 1 | 1 | 2011 | 2011 |
| Rheumatoid Arthritis | C0003873 | LY6G5C   | 80741 | Q5SR4  | lymphocyte antigen family member G5C                  | 6           | 3  | 0.931 | 0.192 | 0.0456  | 0.1 |  | 1 | 2 | 1 | 2007 | 2009 |
| Rheumatoid Arthritis | C0003873 | ZNRD1ASP | 80862 |        | zinc ribbon domain containing 1 antisense, pseudogene | 1           | 34 | 0.691 | 0.538 |         | 0.1 |  | 1 | 2 | 2 | 2007 | 2009 |
| Rheumatoid Ar        | C0003873 | PRRT1    | 80863 | Q99946 | proline rich transmembrane protein 1                  |             | 6  | 0.821 | 0.269 | 0.02845 | 0.1 |  | 1 | 1 | 1 | 2011 | 2011 |

|                      |          |        |       |         |                                                            |                            |     |       |       |          |     |  |       |    |    |      |      |
|----------------------|----------|--------|-------|---------|------------------------------------------------------------|----------------------------|-----|-------|-------|----------|-----|--|-------|----|----|------|------|
| thritis              |          |        |       |         |                                                            |                            |     |       |       |          |     |  |       |    |    |      |      |
| Rheumatoid Arthritis | C0003873 | EGFL8  | 80864 | Q99944  | EGF like domain multiple 8                                 | Calcium-binding protein    | 12  | 0.792 | 0.269 | 1.13E-07 | 0.1 |  | 1     | 3  | 2  | 2007 | 2011 |
| Rheumatoid Arthritis | C0003873 | CDR3   | 8163  |         | Cerebellar degeneration-related autoantigen-3              |                            | 233 | 0.472 | 0.808 |          | 0.1 |  | 0.875 | 16 | 0  | 1992 | 2019 |
| Rheumatoid Arthritis | C0003873 | OR5V1  | 81696 | Q9UGF6  | olfactory receptor family 5 subfamily V member 1           | G-protein coupled receptor | 23  | 0.769 | 0.385 | 0.013    | 0.1 |  | 1     | 1  | 2  | 2009 | 2009 |
| Rheumatoid Arthritis | C0003873 | OR12D3 | 81797 | Q9UGF7  | olfactory receptor family 12 subfamily D member 3          | G-protein coupled receptor | 27  | 0.743 | 0.875 | 0.0083   | 0.1 |  | 1     | 1  | 1  | 2009 | 2009 |
| Rheumatoid Arthritis | C0003873 | CASP3  | 836   | P42574  | caspase 3                                                  | Enzyme                     | 819 | 0.351 | 0.923 | 0.0117   | 0.1 |  | 1     | 10 | 0  | 2006 | 2018 |
| Rheumatoid Ar        | C0003873 | UQC2   | 8430  | Q9BR T2 | ubiquinol-cytochrome c reductase complex assembly factor 2 |                            | 30  | 0.705 | 0.462 | 0.0186   | 0.1 |  | 1     | 3  | 10 | 2007 | 2011 |

|                                                 |                          |                 |                       |            |                                                                             |                   |         |                       |                       |                                  |         |  |                   |    |   |          |                  |
|-------------------------------------------------|--------------------------|-----------------|-----------------------|------------|-----------------------------------------------------------------------------|-------------------|---------|-----------------------|-----------------------|----------------------------------|---------|--|-------------------|----|---|----------|------------------|
| thr<br>itis                                     |                          |                 |                       |            |                                                                             |                   |         |                       |                       |                                  |         |  |                   |    |   |          |                  |
| Rh<br>eu<br>ma<br>toi<br>d<br>Ar<br>thr<br>itis | C<br>00<br>03<br>87<br>3 | DH<br>X1<br>6   | 8<br>4<br>4<br>9      | O602<br>31 | DEAH-<br>box<br>helicase<br>16                                              | En<br>zy<br>me    | 24      | 0<br>.<br>7<br>1<br>6 | 0<br>.<br>5           | 1.<br>6<br>E<br>-<br>1<br>2      | 0.<br>1 |  | 1                 | 2  | 3 | 20<br>07 | 2<br>0<br>0<br>9 |
| Rh<br>eu<br>ma<br>toi<br>d<br>Ar<br>thr<br>itis | C<br>00<br>03<br>87<br>3 | PG<br>BD<br>1   | 8<br>4<br>5<br>4<br>7 | Q96J<br>S3 | piggyBac<br>transposable<br>element<br>derived 1                            |                   | 7       | 0<br>.<br>8<br>2<br>1 | 0<br>.<br>2<br>6<br>9 | 4.<br>7<br>3<br>E<br>-<br>1<br>0 | 0.<br>1 |  | 1                 | 1  | 1 | 20<br>09 | 2<br>0<br>0<br>9 |
| Rh<br>eu<br>ma<br>toi<br>d<br>Ar<br>thr<br>itis | C<br>00<br>03<br>87<br>3 | HA<br>VC<br>R2  | 8<br>4<br>8<br>6<br>8 | Q8TD<br>Q0 | hepatitis A<br>virus cellular<br>receptor 2                                 |                   | 29<br>9 | 0<br>.<br>4<br>5      | 0<br>.<br>8<br>0<br>8 | 0.<br>0<br>3<br>8<br>6<br>6      | 0.<br>1 |  | 0.<br>8<br>5<br>7 | 14 | 2 | 20<br>04 | 2<br>0<br>1<br>9 |
| Rh<br>eu<br>ma<br>toi<br>d<br>Ar<br>thr<br>itis | C<br>00<br>03<br>87<br>3 | AIF<br>M2       | 8<br>4<br>8<br>8<br>3 | Q9BR<br>Q8 | apoptosi<br>s<br>inducing<br>factor<br>mitocho<br>ndria<br>associat<br>ed 2 | En<br>zy<br>me    | 9       | 0<br>.<br>8<br>3<br>9 | 0<br>.<br>1<br>9<br>2 | 1.<br>1<br>1<br>E<br>-<br>0<br>5 | 0.<br>1 |  | 1                 | 1  | 1 | 20<br>19 | 2<br>0<br>1<br>9 |
| Rh<br>eu<br>ma<br>toi<br>d<br>Ar<br>thr<br>itis | C<br>00<br>03<br>87<br>3 | CE<br>P89       | 8<br>4<br>9<br>0<br>2 | Q96S<br>T8 | centrosomal<br>protein 89                                                   |                   | 9       | 0<br>.<br>9<br>3<br>1 | 0<br>.<br>1<br>9<br>2 | 8.<br>3<br>5<br>E<br>-<br>2<br>6 | 0.<br>1 |  | 1                 | 1  | 1 | 20<br>11 | 2<br>0<br>1<br>1 |
| Rh<br>eu<br>ma<br>toi<br>d<br>Ar<br>thr<br>itis | C<br>00<br>03<br>87<br>3 | PPI<br>L4       | 8<br>5<br>3<br>1<br>3 | Q8W<br>UA2 | peptidylprolyl<br>isomerase like<br>4                                       |                   | 6       | 0<br>.<br>8<br>6<br>1 | 0<br>.<br>1<br>5<br>4 | 1.<br>6<br>9<br>E<br>-<br>0<br>9 | 0.<br>1 |  | 1                 | 2  | 1 | 20<br>14 | 2<br>0<br>1<br>9 |
| Rh<br>eu<br>ma<br>toi                           | C<br>00<br>03            | TN<br>FS<br>F11 | 8<br>6<br>0<br>0      | O147<br>88 | TNF<br>superfa<br>mily                                                      | Sig<br>nal<br>ing | 32<br>7 | 0<br>.<br>4           | 0<br>.<br>8           | 0.<br>0<br>0<br>4                | 0.<br>1 |  | 1                 | 58 | 3 | 19<br>99 | 2<br>0<br>2<br>0 |

|                                                 |                          |                       |                       |            |                                                          |                                         |         |                       |                       |                                  |         |  |                   |    |   |          |                  |
|-------------------------------------------------|--------------------------|-----------------------|-----------------------|------------|----------------------------------------------------------|-----------------------------------------|---------|-----------------------|-----------------------|----------------------------------|---------|--|-------------------|----|---|----------|------------------|
| d<br>Ar<br>thr<br>itis                          | 87<br>3                  |                       |                       |            | member<br>11                                             |                                         |         | 5<br>3                | 4<br>6                | 9<br>1<br>6                      |         |  |                   |    |   |          |                  |
| Rh<br>eu<br>ma<br>toi<br>d<br>Ar<br>thr<br>itis | C<br>00<br>03<br>87<br>3 | TN<br>FR<br>SF1<br>1A | 8<br>7<br>9<br>2      | Q9Y6<br>Q6 | TNF receptor<br>superfamily<br>member 11a                |                                         | 27<br>0 | 0<br>.<br>4<br>8      | 0<br>.<br>8<br>4<br>6 | 0.<br>0<br>0<br>8<br>7<br>6<br>7 | 0.<br>1 |  | 0.<br>8<br>6<br>7 | 15 | 2 | 20<br>01 | 2<br>0<br>1<br>9 |
| Rh<br>eu<br>ma<br>toi<br>d<br>Ar<br>thr<br>itis | C<br>00<br>03<br>87<br>3 | SY<br>NG<br>AP<br>1   | 8<br>8<br>3<br>1      | Q96P<br>V0 | synaptic<br>Ras<br>GTPase<br>activatin<br>g protein<br>1 | En<br>zy<br>me<br>mo<br>dul<br>ato<br>r | 14<br>5 | 0<br>.<br>5<br>8<br>4 | 0<br>.<br>5<br>7<br>7 | 1                                | 0.<br>1 |  | 1                 | 1  | 2 | 20<br>09 | 2<br>0<br>0<br>9 |
| Rh<br>eu<br>ma<br>toi<br>d<br>Ar<br>thr<br>itis | C<br>00<br>03<br>87<br>3 | ST<br>K1<br>9         | 8<br>8<br>5<br>9      | P4984<br>2 | serine/threoni<br>ne kinase 19                           |                                         | 28      | 0<br>.<br>6<br>9<br>1 | 0<br>.<br>5           | 6.<br>7<br>4<br>E<br>-<br>0<br>9 | 0.<br>1 |  | 1                 | 3  | 5 | 20<br>07 | 2<br>0<br>1<br>1 |
| Rh<br>eu<br>ma<br>toi<br>d<br>Ar<br>thr<br>itis | C<br>00<br>03<br>87<br>3 | NA<br>V2              | 8<br>9<br>7<br>9<br>7 | Q8IV<br>L1 | neuron<br>navigator 2                                    |                                         | 27      | 0<br>.<br>7<br>2<br>2 | 0<br>.<br>3<br>8<br>5 | 0.<br>9<br>9<br>9<br>5           | 0.<br>1 |  | 1                 | 1  | 1 | 20<br>18 | 2<br>0<br>1<br>8 |
| Rh<br>eu<br>ma<br>toi<br>d<br>Ar<br>thr<br>itis | C<br>00<br>03<br>87<br>3 | TRI<br>M1<br>5        | 8<br>9<br>8<br>7<br>0 | Q9C0<br>19 | tripartite motif<br>containing 15                        |                                         | 17      | 0<br>.<br>7<br>4<br>3 | 0<br>.<br>3<br>0<br>8 | 7.<br>7<br>6<br>E<br>-<br>0<br>9 | 0.<br>1 |  | 1                 | 2  | 1 | 20<br>07 | 2<br>0<br>0<br>9 |
| Rh<br>eu<br>ma<br>toi<br>d<br>Ar<br>thr<br>itis | C<br>00<br>03<br>87<br>3 | CC<br>NG<br>2         | 9<br>0<br>1           | Q165<br>89 | cyclin<br>G2                                             | En<br>zy<br>me<br>mo<br>dul<br>ato<br>r | 59      | 0<br>.<br>6<br>1<br>5 | 0<br>.<br>5<br>7<br>7 | 0.<br>0<br>0<br>9<br>6<br>8<br>6 | 0.<br>1 |  | 1                 | 1  | 1 | 20<br>13 | 2<br>0<br>1<br>3 |



|                      |          |        |       |        |                                                 |                  |     |       |        |          |     |  |       |    |   |      |      |
|----------------------|----------|--------|-------|--------|-------------------------------------------------|------------------|-----|-------|--------|----------|-----|--|-------|----|---|------|------|
| Rheumatoid Arthritis | C0003873 | SOC3   | 9021  | O14543 | suppressor of cytokine signaling 3              | Enzyme modulator | 375 | 0.434 | 0.808  | 0.74613  | 0.1 |  | 0.9   | 10 | 0 | 2001 | 2019 |
| Rheumatoid Arthritis | C0003873 | IL33   | 90865 | O95760 | interleukin 33                                  |                  | 487 | 0.409 | 0.885  | 8.29E-10 | 0.1 |  | 1     | 23 | 2 | 2007 | 2019 |
| Rheumatoid Arthritis | C0003873 | RABEP1 | 9135  | Q15276 | rabaptin, RAB GTPase binding effector protein 1 |                  | 15  | 0.792 | 0.423  | 0.99851  | 0.1 |  | 1     | 2  | 1 | 2014 | 2019 |
| Rheumatoid Arthritis | C0003873 | IL32   | 9235  | P24001 | interleukin 32                                  |                  | 200 | 0.495 | 0.731  | 3.75E-09 | 0.1 |  | 1     | 19 | 1 | 2005 | 2018 |
| Rheumatoid Arthritis | C0003873 | CD14   | 929   | P08571 | CD14 molecule                                   |                  | 551 | 0.392 | 0.885  | 4.88E-05 | 0.1 |  | 0.943 | 35 | 0 | 1992 | 2019 |
| Rheumatoid Arthritis | C0003873 | MS4A1  | 931   | P11836 | membrane spanning 4-domains A1                  | Receptor         | 451 | 0.411 | 0.846  | 5.08E-05 | 0.1 |  | 0.882 | 17 | 0 | 2001 | 2019 |
| Rheumatoid Ar        | C0003873 | PP2    | 9374  | Q9UMR5 | palmitoyl-protein thioesterase 2                | Enzyme           | 27  | 0.751 | 0.5045 | 0.0045   | 0.1 |  | 1     | 3  | 6 | 2007 | 2011 |

|                                                 |                          |                |                  |            |                                                                          |                                                              |         |                       |                       |                                  |         |  |                   |    |   |          |                  |
|-------------------------------------------------|--------------------------|----------------|------------------|------------|--------------------------------------------------------------------------|--------------------------------------------------------------|---------|-----------------------|-----------------------|----------------------------------|---------|--|-------------------|----|---|----------|------------------|
| thr<br>itis                                     |                          |                |                  |            |                                                                          |                                                              |         |                       | 4<br>2                |                                  |         |  |                   |    |   |          |                  |
| Rh<br>eu<br>ma<br>toi<br>d<br>Ar<br>thr<br>itis | C<br>00<br>03<br>87<br>3 | GR<br>AP<br>2  | 9<br>4<br>0<br>2 | O757<br>91 | GRB2 related<br>adaptor<br>protein 2                                     |                                                              | 53<br>8 | 0<br>.<br>3<br>9<br>4 | 0<br>.<br>9<br>2<br>3 | 0.<br>0<br>0<br>1<br>5<br>3      | 0.<br>1 |  | 1                 | 23 | 1 | 20<br>03 | 2<br>0<br>1<br>9 |
| Rh<br>eu<br>ma<br>toi<br>d<br>Ar<br>thr<br>itis | C<br>00<br>03<br>87<br>3 | FA<br>DS<br>2  | 9<br>4<br>1<br>5 | O958<br>64 | fatty acid<br>desaturase 2                                               |                                                              | 14<br>0 | 0<br>.<br>5<br>7<br>5 | 0<br>.<br>6<br>9<br>2 | 0.<br>9<br>9<br>8<br>1<br>5      | 0.<br>1 |  | 1                 | 3  | 1 | 20<br>09 | 2<br>0<br>1<br>9 |
| Rh<br>eu<br>ma<br>toi<br>d<br>Ar<br>thr<br>itis | C<br>00<br>03<br>87<br>3 | GA<br>BB<br>R2 | 9<br>5<br>6<br>8 | O758<br>99 | gamma-<br>aminobu<br>tyric<br>acid type<br>B<br>receptor<br>subunit<br>2 | G-<br>pro<br>tei<br>n<br>co<br>upl<br>ed<br>rec<br>ept<br>or | 81      | 0<br>.<br>6<br>5      | 0<br>.<br>5<br>3<br>8 | 0.<br>9<br>9<br>9<br>9           | 0.<br>1 |  | 1                 | 1  | 1 | 20<br>18 | 2<br>0<br>1<br>8 |
| Rh<br>eu<br>ma<br>toi<br>d<br>Ar<br>thr<br>itis | C<br>00<br>03<br>87<br>3 | CL<br>OC<br>K  | 9<br>5<br>7<br>5 | O155<br>16 | clock<br>circadian<br>regulator                                          |                                                              | 30<br>9 | 0<br>.<br>4<br>6<br>3 | 0<br>.<br>8<br>8<br>5 | 0.<br>9<br>9<br>9<br>5<br>7      | 0.<br>1 |  | 1                 | 10 | 0 | 20<br>13 | 2<br>0<br>2<br>0 |
| Rh<br>eu<br>ma<br>toi<br>d<br>Ar<br>thr<br>itis | C<br>00<br>03<br>87<br>3 | CD<br>40L<br>G | 9<br>5<br>9      | P2996<br>5 | CD40<br>ligand                                                           | Sig<br>nal<br>ing                                            | 45<br>3 | 0<br>.<br>4<br>1<br>4 | 0<br>.<br>8<br>4<br>6 | 0.<br>7<br>2<br>0<br>7<br>9      | 0.<br>1 |  | 0.<br>9<br>1<br>7 | 24 | 0 | 19<br>95 | 2<br>0<br>1<br>9 |
| Rh<br>eu<br>ma<br>toi<br>d<br>Ar<br>thr<br>itis | C<br>00<br>03<br>87<br>3 | CD<br>44       | 9<br>6<br>0      | P1607<br>0 | CD44<br>molecule<br>(Indian blood<br>group)                              |                                                              | 71<br>1 | 0<br>.<br>3<br>6<br>3 | 0<br>.<br>9<br>6<br>2 | 2.<br>4<br>5<br>E<br>-<br>0<br>7 | 0.<br>1 |  | 1                 | 12 | 0 | 19<br>97 | 2<br>0<br>1<br>8 |

|                      |          |        |      |        |                                                             |                      |     |       |       |          |     |  |   |    |   |      |      |
|----------------------|----------|--------|------|--------|-------------------------------------------------------------|----------------------|-----|-------|-------|----------|-----|--|---|----|---|------|------|
| Rheumatoid Arthritis | C0003873 | MD C1  | 9656 | Q14676 | mediator of DNA damage checkpoint 1                         |                      | 56  | 0.628 | 0.62  | 2.27E-08 | 0.1 |  | 1 | 1  | 1 | 2009 | 2009 |
| Rheumatoid Arthritis | C0003873 | CD68   | 968  | P34810 | CD68 molecule                                               | Transporter          | 452 | 0.408 | 0.488 | 1.41E-06 | 0.1 |  | 1 | 14 | 0 | 1989 | 2015 |
| Rheumatoid Arthritis | C0003873 | N4BP1  | 9683 | O75113 | NEDD4 binding protein 1                                     | Nucleic acid binding | 12  | 0.78  | 0.38  | 0.6256   | 0.1 |  | 1 | 1  | 1 | 2013 | 2013 |
| Rheumatoid Arthritis | C0003873 | PRO P  | 9692 | O15091 | protein only RNase catalytic subunit                        | P                    | 12  | 0.769 | 0.269 | 1.33E-13 | 0.1 |  | 1 | 1  | 1 | 2018 | 2018 |
| Rheumatoid Arthritis | C0003873 | RIPOR2 | 9750 | Q9Y4F9 | RHO family interacting cell polarization regulator 2        |                      | 20  | 0.792 | 0.269 | 0.9284   | 0.1 |  | 1 | 1  | 1 | 2009 | 2009 |
| Rheumatoid Arthritis | C0003873 | CTIF   | 9811 | O43310 | cap binding complex dependent translation initiation factor | Nucleic acid binding | 10  | 0.821 | 0.231 | 0.994    | 0.1 |  | 1 | 1  | 1 | 2009 | 2009 |
| Rheumatoid Arthritis | C0003873 | SMG7   | 9887 | Q92540 | SMG7 nonsense mediated mRNA decay factor                    |                      | 10  | 0.805 | 0.346 | 0.99     | 0.1 |  | 1 | 2  | 1 | 2016 | 2019 |

|                                                 |                          |                      |                       |                       |                                               |                   |          |                       |                       |                                  |          |  |                   |    |   |          |                  |
|-------------------------------------------------|--------------------------|----------------------|-----------------------|-----------------------|-----------------------------------------------|-------------------|----------|-----------------------|-----------------------|----------------------------------|----------|--|-------------------|----|---|----------|------------------|
| Ar<br>thr<br>itis                               |                          |                      |                       |                       |                                               |                   |          |                       | 9<br>8                |                                  |          |  |                   |    |   |          |                  |
| Rh<br>eu<br>ma<br>toi<br>d<br>Ar<br>thr<br>itis | C<br>00<br>03<br>87<br>3 | TN<br>FS<br>F15      | 9<br>9<br>6<br>6      | O951<br>50            | TNF<br>superfa<br>mily<br>member<br>15        | Sig<br>nal<br>ing | 14<br>3  | 0<br>.<br>5<br>3<br>1 | 0<br>.<br>6<br>9<br>2 | 0.<br>0<br>0<br>2<br>8<br>1<br>6 | 0.<br>1  |  | 1                 | 12 | 3 | 20<br>07 | 2<br>0<br>1<br>9 |
| Rh<br>eu<br>ma<br>toi<br>d<br>Ar<br>thr<br>itis | C<br>00<br>03<br>87<br>3 | EBI<br>3             | 1<br>0<br>1<br>4<br>8 | Q142<br>13            | Epstein-<br>Barr<br>virus<br>induced<br>3     | Sig<br>nal<br>ing | 23<br>3  | 0<br>.<br>4<br>7<br>4 | 0<br>.<br>8<br>0<br>8 | 0.<br>1<br>0<br>7<br>9<br>7      | 0.<br>09 |  | 1                 | 9  | 0 | 20<br>04 | 2<br>0<br>1<br>9 |
| Rh<br>eu<br>ma<br>toi<br>d<br>Ar<br>thr<br>itis | C<br>00<br>03<br>87<br>3 | CD<br>KN<br>2A       | 1<br>0<br>2<br>9      | P4277<br>1;Q8<br>N726 | cyclin<br>dependent<br>kinase<br>inhibitor 2A |                   | 13<br>14 | 0<br>.<br>3           | 0<br>.<br>8<br>8<br>5 | 0.<br>3<br>9<br>4<br>7<br>4      | 0.<br>09 |  | 1                 | 9  | 1 | 19<br>89 | 2<br>0<br>1<br>8 |
| Rh<br>eu<br>ma<br>toi<br>d<br>Ar<br>thr<br>itis | C<br>00<br>03<br>87<br>3 | CN<br>TR<br>L        | 1<br>1<br>0<br>6<br>4 | Q7Z7<br>A1            | centriolin                                    |                   | 29       | 0<br>.<br>7<br>1<br>1 | 0<br>.<br>4<br>2<br>3 | 1.<br>8<br>9<br>E<br>-<br>5<br>4 | 0.<br>09 |  | 0.<br>8<br>8<br>9 | 9  | 0 | 20<br>11 | 2<br>0<br>1<br>9 |
| Rh<br>eu<br>ma<br>toi<br>d<br>Ar<br>thr<br>itis | C<br>00<br>03<br>87<br>3 | CD<br>C4<br>2E<br>P1 | 1<br>1<br>1<br>3<br>5 | Q005<br>87            | CDC42<br>effector<br>protein 1                |                   | 17       | 0<br>.<br>7<br>5<br>1 | 0<br>.<br>3<br>4<br>6 | 2.<br>5<br>4<br>E<br>-<br>0<br>5 | 0.<br>09 |  | 0.<br>8<br>8<br>9 | 9  | 0 | 20<br>11 | 2<br>0<br>1<br>9 |
| Rh<br>eu<br>ma<br>toi<br>d<br>Ar<br>thr<br>itis | C<br>00<br>03<br>87<br>3 | CO<br>MP             | 1<br>3<br>1<br>1      | P4974<br>7            | cartilage<br>oligomeric<br>matrix protein     |                   | 23<br>0  | 0<br>.<br>5<br>0<br>3 | 0<br>.<br>8<br>0<br>8 | 1.<br>3<br>5<br>E<br>-<br>0<br>9 | 0.<br>09 |  | 1                 | 9  | 0 | 19<br>97 | 2<br>0<br>1<br>7 |
| Rh<br>eu<br>ma                                  | C<br>00<br>03            | PA<br>RP<br>1        | 1<br>4<br>2           | P0987<br>4            | poly(ADP-<br>ribose)<br>polymerase 1          |                   | 56<br>5  | 0<br>.<br>3           | 0<br>.<br>9           | 0.<br>0<br>0                     | 0.<br>09 |  | 0.<br>7           | 9  | 3 | 20<br>03 | 2<br>0           |

|                                                 |                          |                |                       |            |                                                                               |                                                              |          |                       |                                 |                                  |          |  |                   |   |   |          |                  |
|-------------------------------------------------|--------------------------|----------------|-----------------------|------------|-------------------------------------------------------------------------------|--------------------------------------------------------------|----------|-----------------------|---------------------------------|----------------------------------|----------|--|-------------------|---|---|----------|------------------|
| to<br>id<br>Ar<br>thr<br>itis                   | 87<br>3                  |                |                       |            |                                                                               |                                                              |          | 8<br>9                | 2<br>3                          | 0<br>3<br>3<br>4                 |          |  | 7<br>8            |   |   |          | 1<br>5           |
| Rh<br>eu<br>ma<br>toi<br>d<br>Ar<br>thr<br>itis | C<br>00<br>03<br>87<br>3 | CX<br>3C<br>R1 | 1<br>5<br>2<br>4      | P4923<br>8 | C-X3-C<br>motif<br>chemoki<br>ne<br>receptor<br>1                             | G-<br>pro<br>tei<br>n<br>co<br>upl<br>ed<br>rec<br>ept<br>or | 31<br>0  | 0<br>.<br>4<br>5<br>7 | 0<br>.<br>8<br>8<br>5           | 0.<br>0<br>6<br>1<br>3<br>7<br>1 | 0.<br>09 |  | 0.<br>8<br>8<br>9 | 9 | 0 | 20<br>01 | 2<br>0<br>1<br>8 |
| Rh<br>eu<br>ma<br>toi<br>d<br>Ar<br>thr<br>itis | C<br>00<br>03<br>87<br>3 | AC<br>E        | 1<br>6<br>3<br>6      | P1282<br>1 | angioten<br>sin I<br>converti<br>ng<br>enzyme                                 | En<br>zy<br>me                                               | 10<br>82 | 0<br>.<br>3<br>2<br>8 | 0<br>.<br>9<br>2<br>3           | 1.<br>0<br>3<br>E<br>-<br>3<br>7 | 0.<br>09 |  | 1                 | 9 | 0 | 20<br>00 | 2<br>0<br>2<br>0 |
| Rh<br>eu<br>ma<br>toi<br>d<br>Ar<br>thr<br>itis | C<br>00<br>03<br>87<br>3 | FC<br>GR<br>2B | 2<br>2<br>1<br>3      | P3199<br>4 | Fc<br>fragmen<br>t of IgG<br>receptor<br>IIb                                  | Ce<br>ll<br>ad<br>hes<br>ion                                 | 15<br>5  | 0<br>.<br>5<br>2<br>2 | 0<br>.<br>8<br>4<br>6<br>3<br>7 | 0.<br>4<br>5<br>6<br>3<br>7      | 0.<br>09 |  | 0.<br>7<br>7<br>8 | 9 | 2 | 20<br>02 | 2<br>0<br>1<br>7 |
| Rh<br>eu<br>ma<br>toi<br>d<br>Ar<br>thr<br>itis | C<br>00<br>03<br>87<br>3 | FO<br>XO<br>3  | 2<br>3<br>0<br>9      | O435<br>24 | forkhead box<br>O3                                                            |                                                              | 38<br>1  | 0<br>.<br>4<br>3<br>1 | 0<br>.<br>8<br>0<br>8           | 0.<br>9<br>8<br>8<br>0<br>6      | 0.<br>09 |  | 0.<br>8<br>8<br>9 | 9 | 1 | 20<br>08 | 2<br>0<br>1<br>9 |
| Rh<br>eu<br>ma<br>toi<br>d<br>Ar<br>thr<br>itis | C<br>00<br>03<br>87<br>3 | FO<br>S        | 2<br>3<br>5<br>3      | P0110<br>0 | Fos<br>proto-<br>oncogen<br>e, AP-1<br>transcrip<br>tion<br>factor<br>subunit | Tr<br>ans<br>cri<br>pti<br>on<br>fac<br>tor                  | 52<br>8  | 0<br>.<br>4<br>1<br>1 | 0<br>.<br>8<br>8<br>5           | 0.<br>2<br>6<br>1<br>7<br>6      | 0.<br>09 |  | 1                 | 9 | 0 | 19<br>92 | 2<br>0<br>1<br>7 |
| Rh<br>eu<br>ma<br>toi<br>d<br>Ar                | C<br>00<br>03<br>87<br>3 | HA<br>VC<br>R1 | 2<br>6<br>7<br>6<br>2 | Q96D<br>42 | hepatitis A<br>virus cellular<br>receptor 1                                   |                                                              | 21<br>7  | 0<br>.<br>4<br>8<br>9 | 0<br>.<br>8<br>8<br>5           | 8.<br>5<br>1<br>E<br>-<br>0<br>7 | 0.<br>09 |  | 1                 | 9 | 1 | 20<br>04 | 2<br>0<br>1<br>9 |

|                                                 |                          |                     |                            |            |                                                                               |                                             |         |                       |                       |                                  |          |  |                   |   |   |          |                  |
|-------------------------------------------------|--------------------------|---------------------|----------------------------|------------|-------------------------------------------------------------------------------|---------------------------------------------|---------|-----------------------|-----------------------|----------------------------------|----------|--|-------------------|---|---|----------|------------------|
| thr<br>itis                                     |                          |                     |                            |            |                                                                               |                                             |         |                       |                       |                                  |          |  |                   |   |   |          |                  |
| Rh<br>eu<br>ma<br>toi<br>d<br>Ar<br>thr<br>itis | C<br>00<br>03<br>87<br>3 | HL<br>A-<br>DM<br>A | 3<br>1<br>0<br>8           | P2806<br>7 | major<br>histoco<br>mpatibil<br>ity<br>complex<br>, class II,<br>DM<br>alpha  | Im<br>mu<br>ne<br>res<br>po<br>nse          | 63      | 0<br>.<br>6<br>0<br>8 | 0<br>.<br>6<br>5<br>4 | 0.<br>0<br>2<br>3<br>8<br>1      | 0.<br>09 |  | 0.<br>5<br>5<br>6 | 9 | 0 | 19<br>97 | 2<br>0<br>1<br>3 |
| Rh<br>eu<br>ma<br>toi<br>d<br>Ar<br>thr<br>itis | C<br>00<br>03<br>87<br>3 | IL3                 | 3<br>5<br>6<br>2           | P0870<br>0 | interleukin 3                                                                 |                                             | 21<br>1 | 0<br>.<br>4<br>8<br>9 | 0<br>.<br>7<br>3<br>1 | 2.<br>5<br>9<br>E<br>-<br>0<br>9 | 0.<br>09 |  | 0.<br>8<br>8<br>9 | 9 | 2 | 19<br>88 | 2<br>0<br>1<br>8 |
| Rh<br>eu<br>ma<br>toi<br>d<br>Ar<br>thr<br>itis | C<br>00<br>03<br>87<br>3 | JU<br>N             | 3<br>7<br>2<br>5           | P0541<br>2 | Jun<br>proto-<br>oncogen<br>e, AP-1<br>transcrip<br>tion<br>factor<br>subunit | Tr<br>ans<br>cri<br>pti<br>on<br>fac<br>tor | 34<br>4 | 0<br>.<br>4<br>4<br>2 | 0<br>.<br>8<br>8<br>5 | 0.<br>0<br>5<br>6<br>2           | 0.<br>09 |  | 1                 | 9 | 0 | 19<br>96 | 2<br>0<br>1<br>9 |
| Rh<br>eu<br>ma<br>toi<br>d<br>Ar<br>thr<br>itis | C<br>00<br>03<br>87<br>3 | CX<br>3C<br>L1      | 6<br>3<br>7<br>6           | P7842<br>3 | C-X3-C<br>motif<br>chemoki<br>ne<br>ligand 1                                  | Sig<br>nal<br>ing                           | 24<br>3 | 0<br>.<br>4<br>7<br>8 | 0<br>.<br>8<br>0<br>8 | 0.<br>6<br>0<br>8<br>3<br>7      | 0.<br>09 |  | 0.<br>8<br>8<br>9 | 9 | 0 | 19<br>99 | 2<br>0<br>1<br>8 |
| Rh<br>eu<br>ma<br>toi<br>d<br>Ar<br>thr<br>itis | C<br>00<br>03<br>87<br>3 | TH<br>BS<br>1       | 7<br>0<br>5<br>7           | P0799<br>6 | thrombospond<br>in 1                                                          |                                             | 48<br>0 | 0<br>.<br>4<br>0<br>7 | 0<br>.<br>8<br>8<br>5 | 0.<br>9<br>9<br>8<br>5           | 0.<br>09 |  | 1                 | 9 | 0 | 20<br>06 | 2<br>0<br>1<br>8 |
| Rh<br>eu<br>ma<br>toi<br>d<br>Ar<br>thr<br>itis | C<br>00<br>03<br>87<br>3 | CC<br>R2            | 7<br>2<br>9<br>2<br>3<br>0 | P4159<br>7 | C-C motif<br>chemokine<br>receptor 2                                          |                                             | 43<br>6 | 0<br>.<br>4<br>1<br>8 | 0<br>.<br>8<br>4<br>6 | 0.<br>0<br>2<br>3<br>4<br>1<br>2 | 0.<br>09 |  | 0.<br>8<br>8<br>9 | 9 | 0 | 20<br>03 | 2<br>0<br>1<br>9 |
| Rh<br>eu<br>ma<br>toi                           | C<br>00<br>03            | LR<br>PP<br>RC      | 1<br>0<br>1                | P4270<br>4 | leucine rich<br>pentatricopept<br>ide repeat<br>containing                    |                                             | 22<br>0 | 0<br>.<br>4           | 0<br>.<br>7           | 2.<br>3<br>E<br>-                | 0.<br>08 |  | 0.<br>8<br>7<br>5 | 8 | 0 | 20<br>00 | 2<br>0<br>2<br>0 |

|                                                 |                          |                       |                                  |            |                                                         |                                         |         |                       |                       |                                  |          |                   |   |   |          |                  |
|-------------------------------------------------|--------------------------|-----------------------|----------------------------------|------------|---------------------------------------------------------|-----------------------------------------|---------|-----------------------|-----------------------|----------------------------------|----------|-------------------|---|---|----------|------------------|
| d<br>Ar<br>thr<br>itis                          | 87<br>3                  |                       | 2<br>8                           |            |                                                         |                                         | 9<br>3  | 6<br>9                | 1<br>0                |                                  |          |                   |   |   |          |                  |
| Rh<br>eu<br>ma<br>toi<br>d<br>Ar<br>thr<br>itis | C<br>00<br>03<br>87<br>3 | FS<br>TL<br>1         | 1<br>1<br>1<br>6<br>7            | Q128<br>41 | follistatin like 1                                      | En<br>zy<br>me<br>mo<br>dul<br>ato<br>r | 12<br>8 | 0<br>.<br>5<br>4<br>1 | 0<br>.<br>8<br>0<br>8 | 0.<br>08                         |          | 0.<br>8<br>7<br>5 | 8 | 0 | 19<br>98 | 2<br>0<br>1<br>8 |
| Rh<br>eu<br>ma<br>toi<br>d<br>Ar<br>thr<br>itis | C<br>00<br>03<br>87<br>3 | LI<br>NC<br>026<br>05 | 1.<br>1<br>3<br>E<br>+<br>0<br>8 |            | long<br>intergenic<br>non-protein<br>coding RNA<br>2605 |                                         | 20<br>3 | 0<br>.<br>4<br>9      | 0<br>.<br>7<br>6<br>9 | 0.<br>08                         |          | 1                 | 8 | 0 | 20<br>05 | 2<br>0<br>1<br>8 |
| Rh<br>eu<br>ma<br>toi<br>d<br>Ar<br>thr<br>itis | C<br>00<br>03<br>87<br>3 | CS<br>F1              | 1<br>4<br>3<br>5                 | P0960<br>3 | colony<br>stimulating<br>factor 1                       |                                         | 25<br>9 | 0<br>.<br>4<br>7<br>3 | 0<br>.<br>8<br>0<br>8 | 0.<br>08                         |          | 1                 | 8 | 0 | 19<br>88 | 2<br>0<br>1<br>9 |
| Rh<br>eu<br>ma<br>toi<br>d<br>Ar<br>thr<br>itis | C<br>00<br>03<br>87<br>3 | CA<br>RD<br>8         | 2<br>2<br>9<br>0<br>0            | Q9Y2<br>G2 | caspase<br>recruitment<br>domain family<br>member 8     |                                         | 78      | 0<br>.<br>5<br>9      | 0<br>.<br>7<br>3<br>1 | 1.<br>7<br>7<br>E<br>-<br>0<br>6 | 0.<br>08 | 0.<br>7<br>5      | 8 | 1 | 20<br>07 | 2<br>0<br>1<br>8 |
| Rh<br>eu<br>ma<br>toi<br>d<br>Ar<br>thr<br>itis | C<br>00<br>03<br>87<br>3 | IL4<br>R              | 3<br>5<br>6<br>6                 | P2439<br>4 | interleukin 4<br>receptor                               | Re<br>ce<br>pto<br>r                    | 24<br>2 | 0<br>.<br>4<br>7<br>4 | 0<br>.<br>8<br>4<br>6 | 0.<br>08                         |          | 1                 | 8 | 4 | 20<br>06 | 2<br>0<br>1<br>4 |
| Rh<br>eu<br>ma<br>toi<br>d<br>Ar<br>thr<br>itis | C<br>00<br>03<br>87<br>3 | IL7<br>R              | 3<br>5<br>7<br>5                 | P1687<br>1 | interleukin 7<br>receptor                               | Re<br>ce<br>pto<br>r                    | 23<br>1 | 0<br>.<br>4<br>8<br>7 | 0<br>.<br>7<br>6<br>9 | 3.<br>7<br>6<br>E<br>-<br>0<br>7 | 0.<br>08 | 1                 | 8 | 2 | 20<br>09 | 2<br>0<br>1<br>9 |

|                      |          |       |        |        |                                                  |        |     |       |       |          |      |  |       |   |   |      |      |
|----------------------|----------|-------|--------|--------|--------------------------------------------------|--------|-----|-------|-------|----------|------|--|-------|---|---|------|------|
| Rheumatoid Arthritis | C0003873 | MP8   | 4317   | P22894 | matrix metalloproteinase 8                       | Enzyme | 213 | 0.488 | 0.88  | 1.07E-24 | 0.08 |  | 1     | 8 | 0 | 1999 | 2019 |
| Rheumatoid Arthritis | C0003873 | WG    | 474168 |        | Wegener granulomatosis                           |        | 61  | 0.595 | 0.808 |          | 0.08 |  | 1     | 8 | 0 | 2009 | 2019 |
| Rheumatoid Arthritis | C0003873 | PRKN  | 5071   | O60260 | parkin RBR E3 ubiquitin protein ligase           | Enzyme | 409 | 0.431 | 0.846 | 6.93E-07 | 0.08 |  | 1     | 8 | 0 | 2005 | 2019 |
| Rheumatoid Arthritis | C0003873 | SOST  | 50964  | Q9BQB4 | sclerostin                                       |        | 270 | 0.474 | 0.808 | 0.86731  | 0.08 |  | 0.875 | 8 | 0 | 2017 | 2020 |
| Rheumatoid Arthritis | C0003873 | TRIM1 | 54210  | Q9NP99 | triggering receptor expressed on myeloid cells 1 |        | 172 | 0.515 | 0.806 | 0.0278   | 0.08 |  | 0.875 | 8 | 0 | 2009 | 2019 |
| Rheumatoid Arthritis | C0003873 | MAPK3 | 5595   | P27361 | mitogen-activated protein kinase 3               | Kinase | 647 | 0.379 | 0.858 | 0.03684  | 0.08 |  | 1     | 8 | 0 | 2006 | 2019 |
| Rheumatoid Ar        | C0003873 | MYDGF | 56005  | Q969H8 | myeloid derived growth factor                    |        | 295 | 0.451 | 0.846 | 3.49E-   | 0.08 |  | 1     | 8 | 0 | 2007 | 2019 |



|                                                 |                          |                |                  |            |                                                  |                                                              |         |                       |                       |                                  |          |  |                   |   |   |                    |
|-------------------------------------------------|--------------------------|----------------|------------------|------------|--------------------------------------------------|--------------------------------------------------------------|---------|-----------------------|-----------------------|----------------------------------|----------|--|-------------------|---|---|--------------------|
| thr<br>itis                                     |                          |                |                  |            |                                                  |                                                              |         |                       | 0<br>6                |                                  |          |  |                   |   |   |                    |
| Rh<br>eu<br>ma<br>toi<br>d<br>Ar<br>thr<br>itis | C<br>00<br>03<br>87<br>3 | PT<br>X3       | 5<br>8<br>0<br>6 | P2602<br>2 | pentraxin 3                                      |                                                              | 29<br>6 | 0<br>.<br>4<br>5<br>7 | 0<br>.<br>8<br>0<br>8 | 6.<br>9<br>8<br>E<br>-<br>0<br>5 | 0.<br>08 |  | 0.<br>8<br>7<br>5 | 8 | 0 | 20<br>00<br>2<br>0 |
| Rh<br>eu<br>ma<br>toi<br>d<br>Ar<br>thr<br>itis | C<br>00<br>03<br>87<br>3 | RF<br>C1       | 5<br>9<br>8<br>1 | P3525<br>1 | replication<br>factor<br>subunit 1               | C                                                            | 14<br>4 | 0<br>.<br>5<br>4<br>1 | 0<br>.<br>8<br>0<br>8 | 0.<br>9<br>7<br>3<br>0<br>5      | 0.<br>08 |  | 1                 | 8 | 0 | 20<br>07<br>1<br>9 |
| Rh<br>eu<br>ma<br>toi<br>d<br>Ar<br>thr<br>itis | C<br>00<br>03<br>87<br>3 | CX<br>CR<br>5  | 6<br>4<br>3      | P3230<br>2 | C-X-C<br>motif<br>chemoki<br>ne<br>receptor<br>5 | G-<br>pro<br>tei<br>n<br>co<br>upl<br>ed<br>rec<br>ept<br>or | 14<br>6 | 0<br>.<br>5<br>2<br>4 | 0<br>.<br>7<br>6<br>9 | 0.<br>7<br>8<br>6<br>1           | 0.<br>08 |  | 1                 | 8 | 0 | 20<br>05<br>2<br>0 |
| Rh<br>eu<br>ma<br>toi<br>d<br>Ar<br>thr<br>itis | C<br>00<br>03<br>87<br>3 | AD<br>AM<br>17 | 6<br>8<br>6<br>8 | P7853<br>6 | ADAM<br>metallopeptid<br>ase domain 17           |                                                              | 31<br>6 | 0<br>.<br>4<br>5<br>3 | 0<br>.<br>8<br>0<br>8 | 0.<br>9<br>9<br>5<br>2<br>8      | 0.<br>08 |  | 1                 | 8 | 0 | 20<br>01<br>1<br>9 |
| Rh<br>eu<br>ma<br>toi<br>d<br>Ar<br>thr<br>itis | C<br>00<br>03<br>87<br>3 | TP<br>O        | 7<br>1<br>7<br>3 | P0720<br>2 | thyroid<br>peroxida<br>se                        | En<br>zy<br>me                                               | 30<br>6 | 0<br>.<br>4<br>5<br>5 | 0<br>.<br>8<br>4<br>6 | 1.<br>8<br>2<br>E<br>-<br>2<br>1 | 0.<br>08 |  | 0.<br>8<br>7<br>5 | 8 | 0 | 20<br>17<br>2<br>0 |
| Rh<br>eu<br>ma<br>toi<br>d<br>Ar<br>thr<br>itis | C<br>00<br>03<br>87<br>3 | C3             | 7<br>1<br>8      | P0102<br>4 | comple<br>ment C3                                | En<br>zy<br>me<br>mo<br>dul<br>ato<br>r                      | 34<br>3 | 0<br>.<br>4<br>5      | 0<br>.<br>8<br>5      | 0.<br>9<br>0<br>4<br>2<br>1      | 0.<br>08 |  | 1                 | 8 | 0 | 19<br>86<br>1<br>8 |
| Rh<br>eu                                        | C<br>00                  | AR<br>HG       | 7<br>9           | Q127<br>74 | Rho guanine<br>nucleotide                        |                                                              | 14<br>0 | 0<br>.<br>.           | 0<br>.<br>.           | 7.<br>5                          | 0.<br>08 |  | 1                 | 8 | 0 | 20<br>04<br>0      |

|                                                 |                          |                      |                       |            |                                          |                      |         |                       |                       |                                  |          |  |                   |   |   |          |                  |
|-------------------------------------------------|--------------------------|----------------------|-----------------------|------------|------------------------------------------|----------------------|---------|-----------------------|-----------------------|----------------------------------|----------|--|-------------------|---|---|----------|------------------|
| ma<br>toi<br>d<br>Ar<br>thr<br>itis             | 03<br>87<br>3            | EF<br>5              | 8<br>4                |            | exchange<br>factor 5                     |                      |         | 5<br>2<br>6           | 8<br>0<br>8           | 9<br>E<br>-<br>1<br>4            |          |  |                   |   |   | 1<br>9   |                  |
| Rh<br>eu<br>ma<br>toi<br>d<br>Ar<br>thr<br>itis | C<br>00<br>03<br>87<br>3 | SY<br>VN<br>1        | 8<br>4<br>4<br>4<br>7 | Q86T<br>M6 | synoviolin 1                             |                      | 79      | 0<br>.<br>5<br>9<br>9 | 0<br>.<br>7<br>3<br>1 | 0.<br>9<br>9<br>7                | 0.<br>08 |  | 1                 | 8 | 0 | 20<br>03 | 2<br>0<br>1<br>9 |
| Rh<br>eu<br>ma<br>toi<br>d<br>Ar<br>thr<br>itis | C<br>00<br>03<br>87<br>3 | TN<br>FR<br>SF6<br>B | 8<br>7<br>7<br>1      | O954<br>07 | TNF receptor<br>superfamily<br>member 6b |                      | 14<br>5 | 0<br>.<br>5<br>2<br>8 | 0<br>.<br>7<br>3<br>1 | 3.<br>8<br>7<br>E<br>-<br>0<br>6 | 0.<br>08 |  | 1                 | 8 | 0 | 20<br>07 | 2<br>0<br>1<br>8 |
| Rh<br>eu<br>ma<br>toi<br>d<br>Ar<br>thr<br>itis | C<br>00<br>03<br>87<br>3 | IL1<br>8R<br>1       | 8<br>8<br>0<br>9      | Q134<br>78 | interleuk<br>in 18<br>receptor<br>1      | Re<br>ce<br>pto<br>r | 23<br>4 | 0<br>.<br>4<br>7<br>3 | 0<br>.<br>8<br>0<br>8 | 8.<br>6<br>3<br>E<br>-<br>0<br>6 | 0.<br>08 |  | 0.<br>8<br>7<br>5 | 8 | 0 | 20<br>03 | 2<br>0<br>1<br>9 |
| Rh<br>eu<br>ma<br>toi<br>d<br>Ar<br>thr<br>itis | C<br>00<br>03<br>87<br>3 | TI<br>ME<br>LE<br>SS | 8<br>9<br>1<br>4      | Q9U<br>NS1 | timeless<br>circadian<br>regulator       |                      | 14<br>0 | 0<br>.<br>5<br>3<br>3 | 0<br>.<br>8<br>0<br>8 | 9.<br>8<br>5<br>E<br>-<br>3<br>5 | 0.<br>08 |  | 1                 | 8 | 0 | 20<br>04 | 2<br>0<br>1<br>9 |
| Rh<br>eu<br>ma<br>toi<br>d<br>Ar<br>thr<br>itis | C<br>00<br>03<br>87<br>3 | PT<br>GE<br>S        | 9<br>5<br>3<br>6      | O146<br>84 | prostaglandin<br>E synthase              |                      | 15<br>0 | 0<br>.<br>5<br>4      | 0<br>.<br>7<br>6<br>9 | 0.<br>7<br>1<br>3<br>1<br>7      | 0.<br>08 |  | 1                 | 8 | 0 | 20<br>03 | 2<br>0<br>1<br>7 |
| Rh<br>eu<br>ma<br>toi<br>d<br>Ar<br>thr<br>itis | C<br>00<br>03<br>87<br>3 | SE<br>MA<br>3A       | 1<br>0<br>3<br>7<br>1 | Q145<br>63 | semapho<br>rin 3A                        | Sig<br>nal<br>ing    | 20<br>2 | 0<br>.<br>5           | 0<br>.<br>8<br>0<br>8 | 0.<br>9<br>7<br>7<br>9           | 0.<br>07 |  | 1                 | 7 | 0 | 20<br>13 | 2<br>0<br>2<br>0 |

|                      |          |        |        |        |                                                  |                            |     |       |       |         |      |  |       |   |   |      |      |
|----------------------|----------|--------|--------|--------|--------------------------------------------------|----------------------------|-----|-------|-------|---------|------|--|-------|---|---|------|------|
| Rheumatoid Arthritis | C0003873 | ANP32B | 10541  | Q92688 | acidic nuclear phosphoprotein 32 family member B | Enzyme modulator           | 120 | 0.541 | 0.731 | 0.95827 | 0.07 |  | 1     | 7 | 0 | 2005 | 2019 |
| Rheumatoid Arthritis | C0003873 | CDAN1  | 146059 | Q8IWY9 | codanin 1                                        |                            | 77  | 0.611 | 0.731 | 1.1E-12 | 0.07 |  | 1     | 7 | 0 | 2017 | 2020 |
| Rheumatoid Arthritis | C0003873 | CTSK   | 1513   | P43235 | cathepsin K                                      | Enzyme                     | 221 | 0.497 | 0.808 | 3.1E-05 | 0.07 |  | 1     | 7 | 0 | 1997 | 2020 |
| Rheumatoid Arthritis | C0003873 | CBLL2  | 158506 | Q8N7E2 | Cbl proto-oncogene like 2                        | Enzyme                     | 235 | 0.476 | 0.808 |         | 0.07 |  | 1     | 7 | 0 | 2005 | 2019 |
| Rheumatoid Arthritis | C0003873 | ETS1   | 2113   | P14921 | ETS proto-oncogene 1, transcription factor       | Transcription factor       | 327 | 0.444 | 0.731 | 0.7816  | 0.07 |  | 1     | 7 | 2 | 2001 | 2017 |
| Rheumatoid Arthritis | C0003873 | F2RL1  | 2150   | P55085 | F2R like trypsin receptor 1                      | G-protein coupled receptor | 256 | 0.489 | 0.760 | 0.00148 | 0.07 |  | 1     | 7 | 0 | 2007 | 2018 |
| Rheumatoid           | C0003    | IFNL1  | 2826   | Q8IU54 | interferon lambda 1                              |                            | 73  | 0.5   | 0.6   | 0.000   | 0.07 |  | 0.714 | 7 | 0 | 2013 | 2020 |

|                                                 |                          |                     |                       |            |                                                                                                |                      |          |                       |                            |                                  |          |  |                   |   |   |          |                  |
|-------------------------------------------------|--------------------------|---------------------|-----------------------|------------|------------------------------------------------------------------------------------------------|----------------------|----------|-----------------------|----------------------------|----------------------------------|----------|--|-------------------|---|---|----------|------------------|
| d<br>Ar<br>thr<br>itis                          | 87<br>3                  |                     | 1<br>8                |            |                                                                                                |                      |          | 9<br>9                | 5<br>4                     | 2<br>8<br>5                      |          |  |                   |   |   |          |                  |
| Rh<br>eu<br>ma<br>toi<br>d<br>Ar<br>thr<br>itis | C<br>00<br>03<br>87<br>3 | AN<br>GP<br>T2      | 2<br>8<br>5           | O151<br>23 | angiopoi<br>etin 2                                                                             | Sig<br>nal<br>ing    | 45<br>7  | 0<br>.<br>4<br>1      | 0<br>.<br>8<br>4<br>6      | 0.<br>8<br>3<br>2<br>0<br>8      | 0.<br>07 |  | 1                 | 7 | 5 | 20<br>02 | 2<br>0<br>1<br>9 |
| Rh<br>eu<br>ma<br>toi<br>d<br>Ar<br>thr<br>itis | C<br>00<br>03<br>87<br>3 | CD<br>274           | 2<br>9<br>1<br>2<br>6 | Q9NZ<br>Q7 | CD274<br>molecul<br>e                                                                          | Re<br>ce<br>pto<br>r | 10<br>11 | 0<br>.<br>3<br>2<br>4 | 0<br>.<br>9<br>2<br>3      | 0.<br>0<br>1<br>9<br>1<br>6      | 0.<br>07 |  | 0.<br>8<br>5<br>7 | 7 | 0 | 20<br>07 | 2<br>0<br>1<br>8 |
| Rh<br>eu<br>ma<br>toi<br>d<br>Ar<br>thr<br>itis | C<br>00<br>03<br>87<br>3 | IC<br>OS            | 2<br>9<br>8<br>5<br>1 | Q9Y6<br>W8 | inducible<br>cell<br>costimulator                                                              | T                    | 19<br>3  | 0<br>.<br>5<br>0<br>2 | 0<br>.<br>7<br>3<br>1<br>2 | 0.<br>0<br>3<br>1<br>2<br>8<br>4 | 0.<br>07 |  | 1                 | 7 | 0 | 20<br>03 | 2<br>0<br>1<br>8 |
| Rh<br>eu<br>ma<br>toi<br>d<br>Ar<br>thr<br>itis | C<br>00<br>03<br>87<br>3 | CF<br>H             | 3<br>0<br>7<br>5      | P0860<br>3 | complement<br>factor H                                                                         |                      | 39<br>3  | 0<br>.<br>4<br>4<br>1 | 0<br>.<br>8<br>8<br>5      | 0.<br>8<br>6<br>0<br>6<br>1      | 0.<br>07 |  | 0.<br>8<br>5<br>7 | 7 | 2 | 19<br>90 | 2<br>0<br>1<br>2 |
| Rh<br>eu<br>ma<br>toi<br>d<br>Ar<br>thr<br>itis | C<br>00<br>03<br>87<br>3 | IL1<br>2B           | 3<br>5<br>9<br>3      | P2946<br>0 | interleuk<br>in 12B                                                                            | Sig<br>nal<br>ing    | 24<br>9  | 0<br>.<br>4<br>8      | 0<br>.<br>8<br>8<br>5      | 0.<br>0<br>0<br>0<br>1<br>1<br>4 | 0.<br>07 |  | 0.<br>7<br>1<br>4 | 7 | 1 | 20<br>05 | 2<br>0<br>1<br>7 |
| Rh<br>eu<br>ma<br>toi<br>d<br>Ar<br>thr<br>itis | C<br>00<br>03<br>87<br>3 | KI<br>R2<br>DS<br>1 | 3<br>8<br>0<br>6      | Q149<br>54 | killer<br>cell<br>immuno<br>globulin<br>like<br>receptor,<br>two Ig<br>domains<br>and<br>short | Re<br>ce<br>pto<br>r | 12<br>3  | 0<br>.<br>5<br>3<br>7 | 0<br>.<br>7<br>6<br>9      |                                  | 0.<br>07 |  | 1                 | 7 | 0 | 20<br>06 | 2<br>0<br>1<br>9 |

|                                                 |                          |                |                            |            |                                              |                        |         |                       |                       |                                  |          |  |                   |   |   |          |                  |
|-------------------------------------------------|--------------------------|----------------|----------------------------|------------|----------------------------------------------|------------------------|---------|-----------------------|-----------------------|----------------------------------|----------|--|-------------------|---|---|----------|------------------|
|                                                 |                          |                |                            |            | cytoplas<br>mic tail<br>1                    |                        |         |                       |                       |                                  |          |  |                   |   |   |          |                  |
| Rh<br>eu<br>ma<br>toi<br>d<br>Ar<br>thr<br>itis | C<br>00<br>03<br>87<br>3 | LP<br>A        | 4<br>0<br>1<br>8           | P0851<br>9 | lipoprot<br>ein(a)                           | En<br>zy<br>me         | 34<br>0 | 0<br>.<br>4<br>4<br>4 | 0<br>.<br>7<br>6<br>9 | 6.<br>5<br>9<br>E<br>-<br>8<br>9 | 0.<br>07 |  | 1                 | 7 | 0 | 19<br>95 | 2<br>0<br>1<br>9 |
| Rh<br>eu<br>ma<br>toi<br>d<br>Ar<br>thr<br>itis | C<br>00<br>03<br>87<br>3 | MI<br>R2<br>1  | 4<br>0<br>6<br>9<br>9<br>1 |            | microRNA 21                                  |                        | 72<br>6 | 0<br>.<br>3<br>6<br>3 | 0<br>.<br>8<br>4<br>6 |                                  | 0.<br>07 |  | 1                 | 7 | 0 | 20<br>14 | 2<br>0<br>1<br>9 |
| Rh<br>eu<br>ma<br>toi<br>d<br>Ar<br>thr<br>itis | C<br>00<br>03<br>87<br>3 | NF<br>E2<br>L2 | 4<br>7<br>8<br>0           | Q162<br>36 | nuclear<br>factor,<br>erythroi<br>d 2 like 2 | En<br>zy<br>me         | 82<br>3 | 0<br>.<br>3<br>5<br>7 | 0<br>.<br>8<br>8<br>5 | 0.<br>0<br>3<br>5<br>7<br>2      | 0.<br>07 |  | 1                 | 7 | 0 | 20<br>16 | 2<br>0<br>1<br>9 |
| Rh<br>eu<br>ma<br>toi<br>d<br>Ar<br>thr<br>itis | C<br>00<br>03<br>87<br>3 | NO<br>S2       | 4<br>8<br>4<br>3           | P3522<br>8 | nitric oxide<br>synthase 2                   |                        | 78<br>3 | 0<br>.<br>3<br>6<br>4 | 0<br>.<br>9<br>2<br>3 | 4.<br>0<br>3<br>E<br>-<br>1<br>5 | 0.<br>07 |  | 0.<br>7<br>1<br>4 | 7 | 1 | 20<br>02 | 2<br>0<br>1<br>9 |
| Rh<br>eu<br>ma<br>toi<br>d<br>Ar<br>thr<br>itis | C<br>00<br>03<br>87<br>3 | OS<br>M        | 5<br>0<br>0<br>8           | P1372<br>5 | oncostat<br>in M                             | Sig<br>nal<br>ing      | 18<br>8 | 0<br>.<br>5<br>0<br>5 | 0<br>.<br>7<br>6<br>9 | 0.<br>5<br>8<br>9<br>1<br>6      | 0.<br>07 |  | 1                 | 7 | 0 | 20<br>00 | 2<br>0<br>1<br>5 |
| Rh<br>eu<br>ma<br>toi<br>d<br>Ar<br>thr<br>itis | C<br>00<br>03<br>87<br>3 | P2<br>RX<br>7  | 5<br>0<br>2<br>7           | Q995<br>72 | purinerg<br>ic<br>receptor<br>P2X 7          | Ion<br>ch<br>an<br>nel | 33<br>7 | 0<br>.<br>4<br>5      | 0<br>.<br>8<br>0<br>8 | 3.<br>3<br>3<br>E<br>-<br>1<br>1 | 0.<br>07 |  | 0.<br>8<br>5<br>7 | 7 | 2 | 20<br>08 | 2<br>0<br>1<br>9 |
| Rh<br>eu<br>ma                                  | C<br>00<br>03            | SE<br>RPI      | 5<br>0                     | P0512<br>1 | serpin<br>family E                           | En<br>zy<br>me         | 77<br>0 | 0<br>.<br>3           | 0<br>.<br>8           | 0.<br>0<br>4                     | 0.<br>07 |  | 1                 | 7 | 0 | 20<br>05 | 2<br>0           |

|                                                 |                          |                |                       |            |                                                                          |                                                            |         |                       |                       |                             |          |  |                   |   |   |          |                  |
|-------------------------------------------------|--------------------------|----------------|-----------------------|------------|--------------------------------------------------------------------------|------------------------------------------------------------|---------|-----------------------|-----------------------|-----------------------------|----------|--|-------------------|---|---|----------|------------------|
| to<br>id<br>Ar<br>thr<br>itis                   | 87<br>3                  | NE<br>1        | 5<br>4                |            | member<br>1                                                              | mo<br>dul<br>ato<br>r                                      |         | 5<br>9                | 8<br>5                | 3<br>6<br>0<br>9            |          |  |                   |   |   |          | 1<br>8           |
| Rh<br>eu<br>ma<br>toi<br>d<br>Ar<br>thr<br>itis | C<br>00<br>03<br>87<br>3 | MB<br>L3<br>P  | 5<br>0<br>6<br>3<br>9 |            | mannose-<br>binding lectin<br>family<br>member 3,<br>pseudogene          |                                                            | 15<br>2 | 0<br>.<br>5<br>1<br>8 | 0<br>.<br>7<br>6<br>9 |                             | 0.<br>07 |  | 0.<br>8<br>5<br>7 | 7 | 0 | 20<br>00 | 2<br>0<br>1<br>1 |
| Rh<br>eu<br>ma<br>toi<br>d<br>Ar<br>thr<br>itis | C<br>00<br>03<br>87<br>3 | PM<br>L        | 5<br>3<br>7<br>1      | P2959<br>0 | promyelocytic<br>leukemia                                                |                                                            | 27<br>4 | 0<br>.<br>4<br>7<br>7 | 0<br>.<br>8<br>4<br>6 | 0.<br>2<br>1<br>2<br>9<br>1 | 0.<br>07 |  | 1                 | 7 | 0 | 19<br>98 | 2<br>0<br>1<br>8 |
| Rh<br>eu<br>ma<br>toi<br>d<br>Ar<br>thr<br>itis | C<br>00<br>03<br>87<br>3 | PP<br>AR<br>G  | 5<br>4<br>6<br>8      | P3723<br>1 | peroxiso<br>me<br>prolifera<br>tor<br>activate<br>d<br>receptor<br>gamma | Nu<br>cle<br>ar<br>rec<br>ept<br>or                        | 87<br>7 | 0<br>.<br>3<br>5<br>8 | 0<br>.<br>8<br>8<br>5 | 0.<br>0<br>2<br>9<br>1<br>4 | 0.<br>07 |  | 1                 | 7 | 2 | 20<br>02 | 2<br>0<br>1<br>9 |
| Rh<br>eu<br>ma<br>toi<br>d<br>Ar<br>thr<br>itis | C<br>00<br>03<br>87<br>3 | S10<br>0A<br>9 | 6<br>2<br>8<br>0      | P0670<br>2 | S100<br>calcium<br>binding<br>protein<br>A9                              | Ca<br>lci<br>um<br>-<br>bin<br>din<br>g<br>pro<br>tei<br>n | 36<br>3 | 0<br>.<br>4<br>3<br>3 | 0<br>.<br>8<br>8<br>5 | 0.<br>4<br>7<br>7           | 0.<br>07 |  | 0.<br>8<br>5<br>7 | 7 | 0 | 19<br>90 | 2<br>0<br>1<br>9 |
| Rh<br>eu<br>ma<br>toi<br>d<br>Ar<br>thr<br>itis | C<br>00<br>03<br>87<br>3 | SA<br>A2       | 6<br>2<br>8<br>9      | P0DJI<br>9 | serum<br>amyloid<br>A2                                                   | Tr<br>ans<br>por<br>ter                                    | 10<br>3 | 0<br>.<br>5<br>6<br>8 | 0<br>.<br>7<br>3<br>1 | 2.<br>7<br>E<br>-<br>0<br>6 | 0.<br>07 |  | 1                 | 7 | 0 | 19<br>98 | 2<br>0<br>0<br>4 |
| Rh<br>eu<br>ma<br>toi<br>d<br>Ar                | C<br>00<br>03<br>87<br>3 | CC<br>L3       | 6<br>3<br>4<br>8      | P1014<br>7 | C-C<br>motif<br>chemoki<br>ne<br>ligand 3                                | Sig<br>nal<br>ing                                          | 28<br>2 | 0<br>.<br>4<br>6      | 0<br>.<br>8<br>8<br>5 | 0.<br>3<br>4<br>9<br>8<br>1 | 0.<br>07 |  | 1                 | 7 | 0 | 19<br>99 | 2<br>0<br>1<br>9 |

|                                                 |                          |                |                       |                       |                                                      |                                                            |         |                       |                       |                                  |          |  |   |   |   |          |                  |
|-------------------------------------------------|--------------------------|----------------|-----------------------|-----------------------|------------------------------------------------------|------------------------------------------------------------|---------|-----------------------|-----------------------|----------------------------------|----------|--|---|---|---|----------|------------------|
| thr<br>itis                                     |                          |                |                       |                       |                                                      |                                                            |         |                       |                       |                                  |          |  |   |   |   |          |                  |
| Rh<br>eu<br>ma<br>toi<br>d<br>Ar<br>thr<br>itis | C<br>00<br>03<br>87<br>3 | TRI<br>M2<br>1 | 6<br>7<br>3<br>7      | P1947<br>4            | tripartite motif<br>containing 21                    |                                                            | 22<br>9 | 0<br>.<br>4<br>8<br>5 | 0<br>.<br>8<br>0<br>8 | 3.<br>3<br>5<br>E<br>-<br>0<br>9 | 0.<br>07 |  | 1 | 7 | 0 | 19<br>85 | 2<br>0<br>1<br>8 |
| Rh<br>eu<br>ma<br>toi<br>d<br>Ar<br>thr<br>itis | C<br>00<br>03<br>87<br>3 | TA<br>C1       | 6<br>8<br>6<br>3      | P2036<br>6            | tachykinin<br>precursor 1                            |                                                            | 47<br>8 | 0<br>.<br>4<br>2<br>4 | 0<br>.<br>9<br>2<br>3 | 0.<br>7<br>4<br>6<br>0<br>8      | 0.<br>07 |  | 1 | 7 | 0 | 19<br>98 | 2<br>0<br>1<br>8 |
| Rh<br>eu<br>ma<br>toi<br>d<br>Ar<br>thr<br>itis | C<br>00<br>03<br>87<br>3 | TL<br>R5       | 7<br>1<br>0<br>0      | O606<br>02            | toll like<br>receptor 5                              |                                                            | 16<br>3 | 0<br>.<br>5<br>1<br>8 | 0<br>.<br>8<br>8<br>5 | 2.<br>4<br>8<br>E<br>-<br>1<br>3 | 0.<br>07 |  | 1 | 7 | 1 | 20<br>10 | 2<br>0<br>1<br>9 |
| Rh<br>eu<br>ma<br>toi<br>d<br>Ar<br>thr<br>itis | C<br>00<br>03<br>87<br>3 | C4<br>B        | 7<br>2<br>1           | P0C0<br>L4;P0<br>C0L5 | comple<br>ment<br>C4B<br>(Chido<br>blood<br>group)   | En<br>zy<br>me<br>mo<br>dul<br>ato<br>r                    | 66      | 0<br>.<br>6<br>0<br>3 | 0<br>.<br>8<br>0<br>8 | 0.<br>8<br>3<br>4<br>4           | 0.<br>07 |  | 1 | 7 | 0 | 19<br>89 | 2<br>0<br>1<br>2 |
| Rh<br>eu<br>ma<br>toi<br>d<br>Ar<br>thr<br>itis | C<br>00<br>03<br>87<br>3 | MU<br>L1       | 7<br>9<br>5<br>9<br>4 | Q969<br>V5            | mitochondrial<br>E3 ubiquitin<br>protein ligase<br>1 |                                                            | 24<br>1 | 0<br>.<br>4<br>7<br>3 | 0<br>.<br>8<br>0<br>8 | 1.<br>9<br>1<br>E<br>-<br>0<br>6 | 0.<br>07 |  | 1 | 7 | 0 | 20<br>05 | 2<br>0<br>1<br>9 |
| Rh<br>eu<br>ma<br>toi<br>d<br>Ar<br>thr<br>itis | C<br>00<br>03<br>87<br>3 | CA<br>LR       | 8<br>1<br>1           | P2779<br>7            | calreticu<br>lin                                     | Ca<br>lci<br>um<br>-<br>bin<br>din<br>g<br>pro<br>tei<br>n | 48<br>7 | 0<br>.<br>4<br>1<br>3 | 0<br>.<br>9<br>2<br>3 | 0.<br>8<br>9<br>1<br>3<br>3      | 0.<br>07 |  | 1 | 7 | 0 | 19<br>85 | 2<br>0<br>1<br>9 |

|                      |          |                               |        |               |                                                     |        |     |       |       |          |      |  |       |   |   |      |      |
|----------------------|----------|-------------------------------|--------|---------------|-----------------------------------------------------|--------|-----|-------|-------|----------|------|--|-------|---|---|------|------|
| Rheumatoid Arthritis | C0003873 | CASP1                         | 834    | P29466        | caspase 1                                           | Enzyme | 444 | 0.413 | 0.885 | 3.52E-05 | 0.07 |  | 1     | 7 | 0 | 2010 | 2019 |
| Rheumatoid Arthritis | C0003873 | TNFSF13                       | 8741   | O75888        | TNF superfamily member 13                           |        | 189 | 0.499 | 0.769 | 0.81724  | 0.07 |  | 1     | 7 | 0 | 2005 | 2019 |
| Rheumatoid Arthritis | C0003873 | CD19                          | 930    | P15391        | CD19 molecule                                       |        | 365 | 0.43  | 0.885 | 0.90496  | 0.07 |  | 1     | 7 | 0 | 1996 | 2016 |
| Rheumatoid Arthritis | C0003873 | CD34                          | 947    | P28906        | CD34 molecule                                       |        | 674 | 0.368 | 0.808 | 4.99E-06 | 0.07 |  | 0.857 | 7 | 0 | 2004 | 2019 |
| Rheumatoid Arthritis | C0003873 | CD69                          | 969    | Q07108        | CD69 molecule                                       |        | 206 | 0.488 | 0.923 | 0.029691 | 0.07 |  | 1     | 7 | 0 | 2001 | 2019 |
| Rheumatoid Arthritis | C0003873 | C4B <sub>2</sub> <sup>-</sup> | 1E+08  | P0C0L4;P0C0L5 | complement component 4B (Chido blood group), copy 2 |        | 31  | 0.671 | 0.731 |          | 0.06 |  | 1     | 6 | 0 | 1989 | 1992 |
| Rheumatoid Ar        | C0003873 | KLRC4-KLRK1                   | 1.01E+ | P26718        | KLRC4-KLRK1 readthrough                             |        | 246 | 0.469 | 0.769 |          | 0.06 |  | 1     | 6 | 0 | 2007 | 2018 |



|                                                 |                          |                |                            |            |                                         |                                     |         |                       |                       |                                  |          |  |                   |   |   |          |                  |
|-------------------------------------------------|--------------------------|----------------|----------------------------|------------|-----------------------------------------|-------------------------------------|---------|-----------------------|-----------------------|----------------------------------|----------|--|-------------------|---|---|----------|------------------|
| thr<br>itis                                     |                          |                | 0<br>8                     |            |                                         |                                     |         |                       |                       |                                  |          |  |                   |   |   |          |                  |
| Rh<br>eu<br>ma<br>toi<br>d<br>Ar<br>thr<br>itis | C<br>00<br>03<br>87<br>3 | AD<br>M        | 1<br>3<br>3                | P3531<br>8 | adrenom<br>edullin                      | Sig<br>nal<br>ing                   | 40<br>5 | 0<br>.<br>4<br>3<br>6 | 0<br>.<br>8<br>0<br>8 | 0.<br>0<br>4<br>0<br>8<br>3<br>1 | 0.<br>06 |  | 1                 | 6 | 0 | 20<br>04 | 2<br>0<br>1<br>4 |
| Rh<br>eu<br>ma<br>toi<br>d<br>Ar<br>thr<br>itis | C<br>00<br>03<br>87<br>3 | HT             | 1<br>4<br>0<br>8<br>0<br>5 |            | Hashimoto<br>thyroiditis                |                                     | 17<br>0 | 0<br>.<br>5<br>0<br>5 | 0<br>.<br>7<br>3<br>1 |                                  | 0.<br>06 |  | 0.<br>8<br>3<br>3 | 6 | 0 | 20<br>04 | 2<br>0<br>1<br>9 |
| Rh<br>eu<br>ma<br>toi<br>d<br>Ar<br>thr<br>itis | C<br>00<br>03<br>87<br>3 | DM<br>D        | 1<br>7<br>5<br>6           | P1153<br>2 | dystrophin                              |                                     | 48<br>4 | 0<br>.<br>4<br>2<br>3 | 0<br>.<br>9<br>2<br>3 | 1                                | 0.<br>06 |  | 1                 | 6 | 0 | 20<br>02 | 2<br>0<br>1<br>9 |
| Rh<br>eu<br>ma<br>toi<br>d<br>Ar<br>thr<br>itis | C<br>00<br>03<br>87<br>3 | ES<br>R2       | 2<br>1<br>0<br>0           | Q927<br>31 | estrogen<br>receptor<br>2               | Nu<br>cle<br>ar<br>rec<br>ept<br>or | 52<br>8 | 0<br>.<br>4           | 0<br>.<br>9<br>2<br>3 | 4.<br>4<br>5<br>E<br>-<br>0<br>8 | 0.<br>06 |  | 1                 | 6 | 1 | 20<br>09 | 2<br>0<br>1<br>8 |
| Rh<br>eu<br>ma<br>toi<br>d<br>Ar<br>thr<br>itis | C<br>00<br>03<br>87<br>3 | KL<br>RK<br>1  | 2<br>2<br>9<br>1<br>4      | P2671<br>8 | killer<br>lectin<br>receptor K1         | cell<br>like                        | 25<br>5 | 0<br>.<br>4<br>6<br>7 | 0<br>.<br>7<br>6<br>9 | 6.<br>9<br>8<br>E<br>-<br>1<br>4 | 0.<br>06 |  | 1                 | 6 | 0 | 20<br>07 | 2<br>0<br>1<br>8 |
| Rh<br>eu<br>ma<br>toi<br>d<br>Ar<br>thr<br>itis | C<br>00<br>03<br>87<br>3 | TB<br>C1<br>D9 | 2<br>3<br>1<br>5<br>8      | Q6ZT<br>07 | TBC1<br>domain<br>family<br>member<br>9 | En<br>zy<br>me                      | 49<br>1 | 0<br>.<br>3<br>9<br>9 | 0<br>.<br>8<br>4<br>6 | 2.<br>8<br>E<br>-<br>0<br>5      | 0.<br>06 |  | 1                 | 6 | 0 | 19<br>95 | 2<br>0<br>1<br>5 |
| Rh<br>eu<br>ma<br>toi                           | C<br>00<br>03            | FL<br>T1       | 2<br>3<br>2<br>1           | P1794<br>8 | fms<br>related<br>receptor              | Ki<br>nas<br>e                      | 42<br>4 | 0<br>.<br>4           | 0<br>.<br>8           | 0.<br>9<br>9<br>9                | 0.<br>06 |  | 1                 | 6 | 2 | 20<br>06 | 2<br>0<br>1<br>9 |

|                                                 |                          |                |                       |            |                                                                             |                                                              |         |                       |                       |                                  |          |  |                   |   |   |          |                  |
|-------------------------------------------------|--------------------------|----------------|-----------------------|------------|-----------------------------------------------------------------------------|--------------------------------------------------------------|---------|-----------------------|-----------------------|----------------------------------|----------|--|-------------------|---|---|----------|------------------|
| d<br>Ar<br>thr<br>itis                          | 87<br>3                  |                |                       |            | tyrosine<br>kinase 1                                                        |                                                              |         | 1<br>9                | 4<br>6                | 8<br>3                           |          |  |                   |   |   |          |                  |
| Rh<br>eu<br>ma<br>toi<br>d<br>Ar<br>thr<br>itis | C<br>00<br>03<br>87<br>3 | FO<br>LR<br>2  | 2<br>3<br>5<br>0      | P1420<br>7 | folate receptor<br>beta                                                     |                                                              | 10<br>5 | 0<br>.<br>5<br>5<br>9 | 0<br>.<br>6<br>5<br>4 | 5.<br>4<br>8<br>E<br>-<br>0<br>6 | 0.<br>06 |  | 1                 | 6 | 0 | 19<br>99 | 2<br>0<br>1<br>9 |
| Rh<br>eu<br>ma<br>toi<br>d<br>Ar<br>thr<br>itis | C<br>00<br>03<br>87<br>3 | IL1<br>7R<br>A | 2<br>3<br>7<br>6<br>5 | Q96F<br>46 | interleukin 17<br>receptor A                                                |                                                              | 15<br>9 | 0<br>.<br>5<br>2<br>9 | 0<br>.<br>8<br>0<br>8 | 0.<br>0<br>0<br>3<br>5<br>6      | 0.<br>06 |  | 1                 | 6 | 0 | 20<br>02 | 2<br>0<br>1<br>9 |
| Rh<br>eu<br>ma<br>toi<br>d<br>Ar<br>thr<br>itis | C<br>00<br>03<br>87<br>3 | GA<br>BP<br>A  | 2<br>5<br>5<br>1      | Q065<br>46 | GA<br>binding<br>protein<br>transcrip<br>tion<br>factor<br>subunit<br>alpha | Tr<br>ans<br>cri<br>pti<br>on<br>fac<br>tor                  | 63<br>2 | 0<br>.<br>3<br>7<br>9 | 0<br>.<br>8<br>8<br>5 | 0.<br>9<br>9<br>8<br>1<br>2      | 0.<br>06 |  | 1                 | 6 | 0 | 20<br>16 | 2<br>0<br>1<br>9 |
| Rh<br>eu<br>ma<br>toi<br>d<br>Ar<br>thr<br>itis | C<br>00<br>03<br>87<br>3 | GC<br>G        | 2<br>6<br>4<br>1      | P0127<br>5 | glucago<br>n                                                                |                                                              | 44<br>1 | 0<br>.<br>4<br>3<br>1 | 0<br>.<br>8<br>8<br>5 | 0.<br>0<br>3<br>4<br>8<br>1<br>4 | 0.<br>06 |  | 0.<br>8<br>3<br>3 | 6 | 0 | 20<br>13 | 2<br>0<br>1<br>9 |
| Rh<br>eu<br>ma<br>toi<br>d<br>Ar<br>thr<br>itis | C<br>00<br>03<br>87<br>3 | GL<br>P1<br>R  | 2<br>7<br>4<br>0      | P4322<br>0 | glucago<br>n like<br>peptide<br>1<br>receptor                               | G-<br>pro<br>tei<br>n<br>co<br>upl<br>ed<br>rec<br>ept<br>or | 28<br>8 | 0<br>.<br>4<br>7<br>1 | 0<br>.<br>8<br>4<br>6 | 0.<br>2<br>9<br>3<br>4<br>7      | 0.<br>06 |  | 1                 | 6 | 0 | 20<br>17 | 2<br>0<br>1<br>9 |
| Rh<br>eu<br>ma<br>toi<br>d<br>Ar<br>thr<br>itis | C<br>00<br>03<br>87<br>3 | AN<br>GP<br>T1 | 2<br>8<br>4           | Q153<br>89 | angiopoi<br>etin 1                                                          | Sig<br>nal<br>ing                                            | 34<br>0 | 0<br>.<br>4<br>4<br>6 | 0<br>.<br>8<br>0<br>8 | 0.<br>9<br>5<br>2<br>0<br>8      | 0.<br>06 |  | 1                 | 6 | 0 | 20<br>02 | 2<br>0<br>1<br>2 |

|                      |          |            |        |        |                                                   |                      |     |       |       |          |      |     |      |      |      |
|----------------------|----------|------------|--------|--------|---------------------------------------------------|----------------------|-----|-------|-------|----------|------|-----|------|------|------|
| Rheumatoid Arthritis | C0003873 | IGHV3-69-1 | 28402  |        | immunoglobulin heavy variable 3-69-1 (pseudogene) |                      | 102 | 0561  | 06    |          |      | 160 | 1995 | 2007 |      |
| Rheumatoid Arthritis | C0003873 | GZMB       | 3002   | P10144 | granzyme B                                        | Enzyme               | 290 | 0453  | 0808  | 3.67E-14 | 0.06 |     | 161  | 2003 | 2018 |
| Rheumatoid Arthritis | C0003873 | HP         | 3240   | P00738 | haptoglobin                                       | Enzyme               | 464 | 0412  | 0885  | 1.74E-05 | 0.06 |     | 160  | 1985 | 2017 |
| Rheumatoid Arthritis | C0003873 | AGBL3      | 340351 | Q8NEM8 | ATP/GTP binding protein like 3                    |                      | 5   | 0861  | 0115  | 4.18E-16 | 0.06 |     | 160  | 2017 | 2019 |
| Rheumatoid Arthritis | C0003873 | IL16       | 3603   | Q14005 | interleukin 16                                    | Signaling            | 193 | 0501  | 0846  | 1.24E-10 | 0.06 |     | 160  | 2000 | 2010 |
| Rheumatoid Arthritis | C0003873 | IRF4       | 3662   | Q15306 | interferon regulatory factor 4                    | Transcription factor | 203 | 0491  | 0769  | 0.85677  | 0.06 |     | 160  | 2014 | 2018 |
| Rheumatoid Ar        | C0003873 | ITGAV      | 3685   | P06756 | integrin subunit alpha V                          |                      | 141 | 05266 | 07092 | 0.0002   | 0.06 |     | 164  | 2007 | 2017 |

|                                                 |                          |                     |                  |            |                                                                                                                           |                                         |         |                       |                       |                                  |          |  |                   |   |   |          |                  |
|-------------------------------------------------|--------------------------|---------------------|------------------|------------|---------------------------------------------------------------------------------------------------------------------------|-----------------------------------------|---------|-----------------------|-----------------------|----------------------------------|----------|--|-------------------|---|---|----------|------------------|
| thr<br>itis                                     |                          |                     |                  |            |                                                                                                                           |                                         |         |                       | 2<br>8                |                                  |          |  |                   |   |   |          |                  |
| Rh<br>eu<br>ma<br>toi<br>d<br>Ar<br>thr<br>itis | C<br>00<br>03<br>87<br>3 | KI<br>R3<br>DL<br>2 | 3<br>8<br>1<br>2 | P4363<br>0 | killer<br>cell<br>immuno<br>globulin<br>like<br>receptor,<br>three Ig<br>domains<br>and long<br>cytoplas<br>mic tail<br>2 | Re<br>ce<br>pto<br>r                    | 11<br>8 | 0<br>.<br>5<br>4<br>3 | 0<br>.<br>7<br>6<br>9 | 6.<br>0<br>8<br>E<br>-<br>1<br>2 | 0.<br>06 |  | 0.<br>8<br>3<br>3 | 6 | 0 | 20<br>06 | 2<br>0<br>1<br>9 |
| Rh<br>eu<br>ma<br>toi<br>d<br>Ar<br>thr<br>itis | C<br>00<br>03<br>87<br>3 | LA<br>IR1           | 3<br>9<br>0<br>3 | Q6GT<br>X8 | leukocyt<br>e<br>associat<br>ed<br>immuno<br>globulin<br>like<br>receptor<br>1                                            | Re<br>ce<br>pto<br>r                    | 89      | 0<br>.<br>5<br>6<br>9 | 0<br>.<br>6<br>9<br>2 | 3.<br>2<br>6<br>E<br>-<br>0<br>7 | 0.<br>06 |  | 1                 | 6 | 0 | 19<br>95 | 2<br>0<br>1<br>8 |
| Rh<br>eu<br>ma<br>toi<br>d<br>Ar<br>thr<br>itis | C<br>00<br>03<br>87<br>3 | LG<br>AL<br>S9      | 3<br>9<br>6<br>5 | O001<br>82 | galectin<br>9                                                                                                             | Sig<br>nal<br>ing                       | 19<br>7 | 0<br>.<br>4<br>9<br>6 | 0<br>.<br>7<br>6<br>9 | 6.<br>5<br>5<br>E<br>-<br>0<br>6 | 0.<br>06 |  | 1                 | 6 | 2 | 20<br>07 | 2<br>0<br>1<br>9 |
| Rh<br>eu<br>ma<br>toi<br>d<br>Ar<br>thr<br>itis | C<br>00<br>03<br>87<br>3 | LIF                 | 3<br>9<br>7<br>6 | P1501<br>8 | LIF<br>interleuk<br>in 6<br>family<br>cytokine                                                                            | Sig<br>nal<br>ing                       | 23<br>6 | 0<br>.<br>4<br>8<br>3 | 0<br>.<br>7<br>6<br>9 | 0.<br>5<br>2<br>4<br>2           | 0.<br>06 |  | 1                 | 6 | 0 | 19<br>92 | 2<br>0<br>1<br>9 |
| Rh<br>eu<br>ma<br>toi<br>d<br>Ar<br>thr<br>itis | C<br>00<br>03<br>87<br>3 | MD<br>K             | 4<br>1<br>9<br>2 | P2174<br>1 | midkine                                                                                                                   | Sig<br>nal<br>ing                       | 20<br>9 | 0<br>.<br>4<br>9<br>4 | 0<br>.<br>8<br>0<br>8 | 0.<br>2<br>3<br>0<br>0<br>5      | 0.<br>06 |  | 1                 | 6 | 0 | 20<br>04 | 2<br>0<br>2<br>0 |
| Rh<br>eu<br>ma<br>toi<br>d<br>Ar                | C<br>00<br>03<br>87<br>3 | MY<br>D8<br>8       | 4<br>6<br>1<br>5 | Q998<br>36 | MYD88<br>innate<br>immune<br>signal<br>transduc<br>tion<br>adaptor                                                        | En<br>zy<br>me<br>mo<br>dul<br>ato<br>r | 48<br>0 | 0<br>.<br>4<br>1<br>4 | 0<br>.<br>9<br>2<br>3 | 0.<br>1<br>2<br>4<br>4<br>3      | 0.<br>06 |  | 1                 | 6 | 0 | 20<br>06 | 2<br>0<br>1<br>9 |

|                                                 |                          |                |                       |            |                                                         |                      |         |                       |                       |                                  |          |  |                   |   |   |          |                  |
|-------------------------------------------------|--------------------------|----------------|-----------------------|------------|---------------------------------------------------------|----------------------|---------|-----------------------|-----------------------|----------------------------------|----------|--|-------------------|---|---|----------|------------------|
| thr<br>itis                                     |                          |                |                       |            |                                                         |                      |         |                       |                       |                                  |          |  |                   |   |   |          |                  |
| Rh<br>eu<br>ma<br>toi<br>d<br>Ar<br>thr<br>itis | C<br>00<br>03<br>87<br>3 | NO<br>TC<br>H1 | 4<br>8<br>5<br>1      | P4653<br>1 | notch receptor<br>1                                     |                      | 69<br>3 | 0<br>.<br>3<br>6<br>9 | 0<br>.<br>8<br>8<br>5 | 1                                | 0.<br>06 |  | 1                 | 6 | 0 | 20<br>01 | 2<br>0<br>1<br>8 |
| Rh<br>eu<br>ma<br>toi<br>d<br>Ar<br>thr<br>itis | C<br>00<br>03<br>87<br>3 | IL2<br>1R      | 5<br>0<br>6<br>1<br>5 | Q9HB<br>E5 | interleuk<br>in 21<br>receptor                          | Re<br>ce<br>pto<br>r | 11<br>0 | 0<br>.<br>5<br>5      | 0<br>.<br>7<br>3<br>1 | 0.<br>9<br>9<br>8<br>3<br>5      | 0.<br>06 |  | 1                 | 6 | 0 | 20<br>04 | 2<br>0<br>1<br>9 |
| Rh<br>eu<br>ma<br>toi<br>d<br>Ar<br>thr<br>itis | C<br>00<br>03<br>87<br>3 | CL<br>EC<br>4A | 5<br>0<br>8<br>5<br>6 | Q9U<br>MR7 | C-type<br>lectin<br>domain<br>family 4<br>member<br>A   | Re<br>ce<br>pto<br>r | 14      | 0<br>.<br>7<br>9<br>2 | 0<br>.<br>2<br>6<br>9 | 4.<br>1<br>9<br>E<br>-<br>0<br>5 | 0.<br>06 |  | 0.<br>8<br>3<br>3 | 6 | 4 | 20<br>07 | 2<br>0<br>1<br>5 |
| Rh<br>eu<br>ma<br>toi<br>d<br>Ar<br>thr<br>itis | C<br>00<br>03<br>87<br>3 | TL<br>R7       | 5<br>1<br>2<br>8<br>4 | Q9N<br>YK1 | toll like<br>receptor 7                                 |                      | 27<br>6 | 0<br>.<br>4<br>6<br>4 | 0<br>.<br>8<br>8<br>5 | 0.<br>9<br>7<br>9<br>1<br>2      | 0.<br>06 |  | 1                 | 6 | 2 | 20<br>10 | 2<br>0<br>1<br>9 |
| Rh<br>eu<br>ma<br>toi<br>d<br>Ar<br>thr<br>itis | C<br>00<br>03<br>87<br>3 | GD<br>E1       | 5<br>1<br>5<br>7<br>3 | Q9NZ<br>C3 | glycerophosph<br>odiester<br>phosphodiester<br>ase 1    |                      | 22<br>8 | 0<br>.<br>4<br>8<br>1 | 0<br>.<br>8<br>0<br>8 | 6.<br>1<br>2<br>E<br>-<br>0<br>6 | 0.<br>06 |  | 1                 | 6 | 0 | 20<br>14 | 2<br>0<br>1<br>9 |
| Rh<br>eu<br>ma<br>toi<br>d<br>Ar<br>thr<br>itis | C<br>00<br>03<br>87<br>3 | TL<br>R9       | 5<br>4<br>1<br>0<br>6 | Q9NR<br>96 | toll like<br>receptor 9                                 |                      | 45<br>7 | 0<br>.<br>4<br>1<br>1 | 0<br>.<br>8<br>8<br>5 | 9.<br>8<br>1<br>E<br>-<br>0<br>6 | 0.<br>06 |  | 1                 | 6 | 1 | 20<br>09 | 2<br>0<br>2<br>0 |
| Rh<br>eu<br>ma<br>toi                           | C<br>00<br>03            | BA<br>NK<br>1  | 5<br>5<br>0           | Q8N<br>DB2 | B cell scaffold<br>protein with<br>ankyrin<br>repeats 1 |                      | 51      | 0<br>.<br>6           | 0<br>.<br>5           | 4.<br>7<br>9<br>E                | 0.<br>06 |  | 0.<br>5           | 6 | 3 | 20<br>09 | 2<br>0<br>1<br>8 |

|                                                 |                          |                |                       |            |                                                                    |                   |          |                       |                                      |               |  |   |   |   |          |                  |  |
|-------------------------------------------------|--------------------------|----------------|-----------------------|------------|--------------------------------------------------------------------|-------------------|----------|-----------------------|--------------------------------------|---------------|--|---|---|---|----------|------------------|--|
| d<br>Ar<br>thr<br>itis                          | 87<br>3                  |                | 2<br>4                |            |                                                                    |                   |          | 5<br>3                | 3<br>8                               | -<br>1<br>2   |  |   |   |   |          |                  |  |
| Rh<br>eu<br>ma<br>toi<br>d<br>Ar<br>thr<br>itis | C<br>00<br>03<br>87<br>3 | MA<br>P2<br>K7 | 5<br>6<br>0<br>9      | O147<br>33 | mitogen<br>-<br>activate<br>d protein<br>kinase<br>kinase 7        | Ki<br>nas<br>e    | 40<br>8  | 0<br>.<br>4<br>1<br>9 | 0<br>.<br>8<br>0<br>8<br>5<br>2      | 0.<br>06      |  | 1 | 6 | 0 | 20<br>03 | 2<br>0<br>1<br>8 |  |
| Rh<br>eu<br>ma<br>toi<br>d<br>Ar<br>thr<br>itis | C<br>00<br>03<br>87<br>3 | HA<br>MP       | 5<br>7<br>8<br>1<br>7 | P8117<br>2 | hepcidin<br>antimicrobial<br>peptide                               |                   | 37<br>7  | 0<br>.<br>4<br>3<br>3 | 0<br>.<br>8<br>4<br>6<br>1<br>8      | 0.<br>06      |  | 1 | 6 | 0 | 20<br>08 | 2<br>0<br>1<br>9 |  |
| Rh<br>eu<br>ma<br>toi<br>d<br>Ar<br>thr<br>itis | C<br>00<br>03<br>87<br>3 | BD<br>NF       | 6<br>2<br>7           | P2356<br>0 | brain<br>derived<br>neurotro<br>phic<br>factor                     | Sig<br>nal<br>ing | 99<br>2  | 0<br>.<br>3<br>4<br>5 | 0<br>.<br>9<br>2<br>3<br>6           | 0.<br>06      |  | 1 | 6 | 0 | 20<br>09 | 2<br>0<br>1<br>8 |  |
| Rh<br>eu<br>ma<br>toi<br>d<br>Ar<br>thr<br>itis | C<br>00<br>03<br>87<br>3 | CC<br>L7       | 6<br>3<br>5<br>4      | P8009<br>8 | C-C<br>motif<br>chemoki<br>ne<br>ligand 7                          | Sig<br>nal<br>ing | 12<br>4  | 0<br>.<br>5<br>4<br>8 | 0<br>.<br>8<br>4<br>6<br>8<br>9<br>3 | 0.<br>06      |  | 1 | 6 | 0 | 20<br>05 | 2<br>0<br>1<br>9 |  |
| Rh<br>eu<br>ma<br>toi<br>d<br>Ar<br>thr<br>itis | C<br>00<br>03<br>87<br>3 | BR<br>AF       | 6<br>7<br>3           | P1505<br>6 | B-Raf<br>proto-<br>oncogen<br>e,<br>serine/th<br>reonine<br>kinase | Ki<br>nas<br>e    | 12<br>28 | 0<br>.<br>3<br>1<br>9 | 0<br>.<br>8<br>4<br>9<br>6<br>9<br>5 | 0.<br>06      |  | 1 | 6 | 0 | 20<br>10 | 2<br>0<br>1<br>9 |  |
| Rh<br>eu<br>ma<br>toi<br>d<br>Ar<br>thr<br>itis | C<br>00<br>03<br>87<br>3 | TE<br>K        | 7<br>0<br>1<br>0      | Q027<br>63 | TEK<br>receptor<br>tyrosine<br>kinase                              | Ki<br>nas<br>e    | 30<br>0  | 0<br>.<br>4<br>6<br>2 | 0<br>.<br>6<br>9<br>2                | 1<br>0.<br>06 |  | 1 | 6 | 0 | 20<br>02 | 2<br>0<br>2<br>0 |  |

|                      |          |        |      |               |                                          |                      |     |       |       |          |      |  |       |   |   |      |      |
|----------------------|----------|--------|------|---------------|------------------------------------------|----------------------|-----|-------|-------|----------|------|--|-------|---|---|------|------|
| Rheumatoid Arthritis | C0003873 | C4A    | 720  | P0C0L4;P0C0L5 | complement C4A (Rodgers blood group)     | Enzyme modulator     | 145 | 0.563 | 0.769 | 1.54E-11 | 0.06 |  | 1     | 6 | 0 | 1989 | 1992 |
| Rheumatoid Arthritis | C0003873 | SUMO1  | 7341 | P63165        | small ubiquitin like modifier 1          |                      | 133 | 0.533 | 0.731 | 0.86128  | 0.06 |  | 1     | 6 | 0 | 2000 | 2019 |
| Rheumatoid Arthritis | C0003873 | BEST1  | 7439 | O76090        | bestrophin 1                             | Ion channel          | 292 | 0.465 | 0.885 | 1.82E-12 | 0.06 |  | 1     | 6 | 0 | 2002 | 2019 |
| Rheumatoid Arthritis | C0003873 | WNT5A  | 7474 | P41221        | Wnt family member 5A                     | Signaling            | 375 | 0.433 | 0.808 | 0.9732   | 0.06 |  | 1     | 6 | 0 | 2000 | 2019 |
| Rheumatoid Arthritis | C0003873 | XRCC1  | 7515 | P18887        | X-ray repair cross complementing 1       |                      | 410 | 0.421 | 0.923 | 6.34E-09 | 0.06 |  | 0.667 | 6 | 3 | 2006 | 2018 |
| Rheumatoid Arthritis | C0003873 | ZBTB16 | 7704 | Q05516        | zinc finger and BTB domain containing 16 | Transcription factor | 154 | 0.545 | 0.808 | 0.9907   | 0.06 |  | 1     | 6 | 0 | 1997 | 2019 |
| Rheumatoid Ar        | C0003873 | CAS    | 831  | P20810        | calpastatin                              |                      | 141 | 0.541 | 0.846 | 4.12E-   | 0.06 |  | 1     | 6 | 0 | 1995 | 2011 |

|                                                 |                          |                      |                  |            |                                                                  |                                     |         |                       |                       |                                  |          |  |                   |   |   |                    |
|-------------------------------------------------|--------------------------|----------------------|------------------|------------|------------------------------------------------------------------|-------------------------------------|---------|-----------------------|-----------------------|----------------------------------|----------|--|-------------------|---|---|--------------------|
| thr<br>itis                                     |                          |                      |                  |            |                                                                  |                                     |         |                       | 1<br>2                |                                  |          |  |                   |   |   |                    |
| Rh<br>eu<br>ma<br>toi<br>d<br>Ar<br>thr<br>itis | C<br>00<br>03<br>87<br>3 | CA<br>SP8            | 8<br>4<br>1      | Q147<br>90 | caspase<br>8                                                     | En<br>zy<br>me                      | 48<br>0 | 0<br>.<br>4<br>0<br>4 | 0<br>.<br>9<br>2<br>3 | 3.<br>7<br>2<br>E<br>-<br>0<br>6 | 0.<br>06 |  | 1                 | 6 | 0 | 20<br>00<br>1<br>7 |
| Rh<br>eu<br>ma<br>toi<br>d<br>Ar<br>thr<br>itis | C<br>00<br>03<br>87<br>3 | TN<br>FR<br>SF2<br>5 | 8<br>7<br>1<br>8 | Q930<br>38 | TNF receptor<br>superfamily<br>member 25                         |                                     | 96      | 0<br>.<br>5<br>7<br>3 | 0<br>.<br>7<br>6<br>9 | 0.<br>0<br>0<br>8<br>6<br>4<br>8 | 0.<br>06 |  | 1                 | 6 | 0 | 20<br>04<br>1<br>8 |
| Rh<br>eu<br>ma<br>toi<br>d<br>Ar<br>thr<br>itis | C<br>00<br>03<br>87<br>3 | AD<br>AM<br>15       | 8<br>7<br>5<br>1 | Q134<br>44 | ADAM<br>metallopro<br>teinase<br>domain<br>15                    | En<br>zy<br>me                      | 59      | 0<br>.<br>6<br>2<br>6 | 0<br>.<br>5<br>7<br>7 | 2.<br>4<br>4<br>E<br>-<br>1<br>6 | 0.<br>06 |  | 1                 | 6 | 0 | 20<br>01<br>1<br>9 |
| Rh<br>eu<br>ma<br>toi<br>d<br>Ar<br>thr<br>itis | C<br>00<br>03<br>87<br>3 | NR<br>112            | 8<br>8<br>5<br>6 | O754<br>69 | nuclear<br>receptor<br>subfamil<br>y 1<br>group I<br>member<br>2 | Nu<br>cle<br>ar<br>rec<br>ept<br>or | 46<br>2 | 0<br>.<br>4<br>1<br>8 | 0<br>.<br>8<br>4<br>6 | 7.<br>2<br>7<br>E<br>-<br>0<br>9 | 0.<br>06 |  | 1                 | 6 | 0 | 20<br>04<br>1<br>8 |
| Rh<br>eu<br>ma<br>toi<br>d<br>Ar<br>thr<br>itis | C<br>00<br>03<br>87<br>3 | CD<br>86             | 9<br>4<br>2      | P4208<br>1 | CD86<br>molecule                                                 |                                     | 21<br>9 | 0<br>.<br>4<br>8<br>3 | 0<br>.<br>7<br>6<br>9 | 0.<br>9<br>4<br>8<br>7<br>9      | 0.<br>06 |  | 0.<br>8<br>3<br>3 | 6 | 2 | 20<br>00<br>1<br>9 |
| Rh<br>eu<br>ma<br>toi<br>d<br>Ar<br>thr<br>itis | C<br>00<br>03<br>87<br>3 | AD<br>A              | 1<br>0<br>0      | P0081<br>3 | adenosin<br>e<br>deamina<br>se                                   | En<br>zy<br>me                      | 37<br>9 | 0<br>.<br>4<br>4      | 0<br>.<br>8<br>8<br>5 | 2.<br>8<br>8<br>E<br>-<br>1<br>2 | 0.<br>05 |  | 1                 | 5 | 0 | 20<br>03<br>1<br>8 |
| Rh<br>eu<br>ma<br>toi                           | C<br>00<br>03            | KI<br>R2<br>DS<br>2  | 1<br>E<br>+      | P4363<br>1 | killer cell<br>immunoglobul<br>in<br>receptor, two               |                                     | 69      | 0<br>.<br>5           | 0<br>.<br>6           |                                  | 0.<br>05 |  | 1                 | 5 | 0 | 20<br>01<br>1<br>6 |



|                                                 |                          |                       |                            |            |                                                            |                                             |         |                       |                       |                                  |          |  |   |   |   |          |                  |
|-------------------------------------------------|--------------------------|-----------------------|----------------------------|------------|------------------------------------------------------------|---------------------------------------------|---------|-----------------------|-----------------------|----------------------------------|----------|--|---|---|---|----------|------------------|
| d<br>Ar<br>thr<br>itis                          | 87<br>3                  |                       | 0<br>8                     |            | Ig domains<br>and short<br>cytoplasmic<br>tail 2           |                                             |         | 9<br>9                | 1<br>5                |                                  |          |  |   |   |   |          |                  |
| Rh<br>eu<br>ma<br>toi<br>d<br>Ar<br>thr<br>itis | C<br>00<br>03<br>87<br>3 | CD<br>KN<br>1A        | 1<br>0<br>2<br>6           | P3893<br>6 | cyclin<br>dependent<br>kinase<br>inhibitor 1A              |                                             | 49<br>0 | 0<br>.<br>4<br>0<br>3 | 0<br>.<br>7<br>6<br>9 | 0.<br>0<br>0<br>1<br>8<br>5<br>8 | 0.<br>05 |  | 1 | 5 | 0 | 20<br>00 | 2<br>0<br>1<br>8 |
| Rh<br>eu<br>ma<br>toi<br>d<br>Ar<br>thr<br>itis | C<br>00<br>03<br>87<br>3 | NF<br>AT<br>5         | 1<br>0<br>7<br>2<br>5      | O949<br>16 | nuclear<br>factor of<br>activate<br>d T cells<br>5         | Tr<br>ans<br>cri<br>pti<br>on<br>fac<br>tor | 88      | 0<br>.<br>6<br>0<br>1 | 0<br>.<br>6<br>9<br>2 | 1                                | 0.<br>05 |  | 1 | 5 | 0 | 20<br>11 | 2<br>0<br>1<br>9 |
| Rh<br>eu<br>ma<br>toi<br>d<br>Ar<br>thr<br>itis | C<br>00<br>03<br>87<br>3 | LIL<br>RB<br>1        | 1<br>0<br>8<br>5<br>9      | Q8N<br>HL6 | leukocyt<br>e immuno<br>globulin<br>like<br>receptor<br>B1 | Re<br>ce<br>pto<br>r                        | 16<br>8 | 0<br>.<br>5<br>1      | 0<br>.<br>7<br>6<br>9 | 5.<br>6<br>5<br>E<br>-<br>1<br>4 | 0.<br>05 |  | 1 | 5 | 0 | 20<br>05 | 2<br>0<br>1<br>9 |
| Rh<br>eu<br>ma<br>toi<br>d<br>Ar<br>thr<br>itis | C<br>00<br>03<br>87<br>3 | BT<br>G3              | 1<br>0<br>9<br>5<br>0      | Q142<br>01 | BTG anti-<br>proliferation<br>factor 3                     |                                             | 14<br>1 | 0<br>.<br>5<br>2<br>8 | 0<br>.<br>8<br>0<br>8 | 0.<br>9<br>1<br>5<br>8<br>2      | 0.<br>05 |  | 1 | 5 | 0 | 19<br>83 | 2<br>0<br>1<br>9 |
| Rh<br>eu<br>ma<br>toi<br>d<br>Ar<br>thr<br>itis | C<br>00<br>03<br>87<br>3 | CIS<br>H              | 1<br>1<br>5<br>4           | Q9NS<br>E2 | cytokine<br>inducibl<br>e SH2<br>containi<br>ng<br>protein | En<br>zy<br>me<br>mo<br>dul<br>ato<br>r     | 19<br>5 | 0<br>.<br>5           | 0<br>.<br>8<br>0<br>8 | 0.<br>0<br>0<br>5<br>3<br>9      | 0.<br>05 |  | 1 | 5 | 0 | 20<br>07 | 2<br>0<br>1<br>8 |
| Rh<br>eu<br>ma<br>toi<br>d<br>Ar<br>thr<br>itis | C<br>00<br>03<br>87<br>3 | TN<br>FR<br>SF1<br>3C | 1<br>1<br>5<br>6<br>5<br>0 | Q96R<br>J3 | TNF receptor<br>superfamily<br>member 13C                  |                                             | 12<br>7 | 0<br>.<br>5<br>4      | 0<br>.<br>7<br>3<br>1 | 0.<br>2<br>6<br>9<br>3           | 0.<br>05 |  | 1 | 5 | 1 | 20<br>07 | 2<br>0<br>1<br>7 |
| Rh<br>eu                                        | C<br>00                  | CC<br>R7              | 1<br>2                     | P3224<br>8 | C-C<br>motif                                               | G-<br>pro                                   | 32<br>0 | 0<br>.<br>.           | 0<br>.<br>.           | 0.<br>0<br>0                     | 0.<br>05 |  | 1 | 5 | 0 | 20<br>17 | 2<br>0           |

|                         |          |         |        |        |                                                                     |                                  |     |      |      |          |      |  |      |      |      |      |
|-------------------------|----------|---------|--------|--------|---------------------------------------------------------------------|----------------------------------|-----|------|------|----------|------|--|------|------|------|------|
| matoid<br>Arthritis     | 03873    |         | 36     |        | chemokine<br>receptor 7                                             | tein<br>coupled<br>receptor      |     | 443  | 769  | 57623    |      |  |      |      |      | 19   |
| Rheumatoid<br>Arthritis | C0003873 | CNR2    | 1269   | P34972 | cannabinoid<br>receptor 2                                           | G-protein<br>coupled<br>receptor | 197 | 0509 | 0846 | 6.54E-06 | 0.05 |  | 153  | 2009 | 2019 |      |
| Rheumatoid<br>Arthritis | C0003873 | SLCO6A1 | 133482 | Q86UG4 | solute carrier<br>organic anion<br>transporter family<br>member 6A1 | Transporter                      | 449 | 0412 | 0885 | 2.88E-11 | 0.05 |  | 0.85 | 0    | 1999 | 2011 |
| Rheumatoid<br>Arthritis | C0003873 | CREB1   | 1385   | P16220 | cAMP responsive<br>element binding<br>protein 1                     |                                  | 294 | 0463 | 0885 | 0.99673  | 0.05 |  | 150  | 2002 | 2017 |      |
| Rheumatoid<br>Arthritis | C0003873 | CTSL    | 1514   | P07711 | cathepsin L                                                         | Enzyme                           | 225 | 0488 | 0846 | 0.00845  | 0.05 |  | 150  | 1990 | 2004 |      |
| Rheumatoid<br>Arthritis | C0003873 | ADRB2   | 154    | P07550 | adrenoc<br>eptor beta 2                                             | G-protein<br>coupled<br>receptor | 387 | 0442 | 0923 | 0.5245   | 0.05 |  | 150  | 2004 | 2018 |      |

|                      |          |        |        |        |                                               |                      |     |       |       |          |      |  |     |   |   |      |      |
|----------------------|----------|--------|--------|--------|-----------------------------------------------|----------------------|-----|-------|-------|----------|------|--|-----|---|---|------|------|
| Rheumatoid Arthritis | C0003873 | CYP1A2 | 1544   | P05177 | cytochrome P450 family 1 subfamily A member 2 | Enzyme               | 218 | 0.494 | 0.23  | 2.48E-10 | 0.05 |  | 0.8 | 5 | 0 | 2008 | 2018 |
| Rheumatoid Arthritis | C0003873 | OLIG3  | 167826 | Q7RTU3 | oligodendrocyte transcription factor 3        | Enzyme               | 4   | 0.861 | 0.192 | 0.8391   | 0.05 |  | 1   | 5 | 1 | 2007 | 2018 |
| Rheumatoid Arthritis | C0003873 | DHODH  | 1723   | Q02127 | dihydroorotate dehydrogenase (quinone)        | Enzyme               | 100 | 0.576 | 0.769 | 0.02988  | 0.05 |  | 1   | 5 | 0 | 2009 | 2019 |
| Rheumatoid Arthritis | C0003873 | DNMT1  | 1786   | P26358 | DNA methyltransferase 1                       | Epigenetic regulator | 496 | 0.406 | 0.885 | 1        | 0.05 |  | 1   | 5 | 0 | 2013 | 2018 |
| Rheumatoid Arthritis | C0003873 | EGR1   | 1958   | P18146 | early growth response 1                       | Nucleic acid binding | 378 | 0.433 | 0.939 | 0.3509   | 0.05 |  | 1   | 5 | 0 | 1992 | 2017 |
| Rheumatoid Arthritis | C0003873 | FCGR1A | 2209   | P12314 | Fc fragment of IgG receptor 1a                | Cell adhesion        | 141 | 0.532 | 0.731 | 0.0131   | 0.05 |  | 1   | 5 | 0 | 1997 | 2019 |
| Rheumatoid Ar        | C0003873 | NLRP1  | 22861  | Q9C000 | NLR family pyrin domain containing 1          |                      | 200 | 0.502 | 0.769 | 4.97E-   | 0.05 |  | 0.8 | 5 | 1 | 2008 | 2017 |

|                                                 |                          |                |                       |            |                                                                                |                                             |         |                       |                       |                                  |          |  |         |   |   |          |                  |
|-------------------------------------------------|--------------------------|----------------|-----------------------|------------|--------------------------------------------------------------------------------|---------------------------------------------|---------|-----------------------|-----------------------|----------------------------------|----------|--|---------|---|---|----------|------------------|
| thr<br>itis                                     |                          |                |                       |            |                                                                                |                                             |         |                       |                       | 1<br>9                           |          |  |         |   |   |          |                  |
| Rh<br>eu<br>ma<br>toi<br>d<br>Ar<br>thr<br>itis | C<br>00<br>03<br>87<br>3 | FO<br>SB       | 2<br>3<br>5<br>4      | P5353<br>9 | FosB<br>proto-<br>oncogen<br>e, AP-1<br>transcrip<br>tion<br>factor<br>subunit | Tr<br>ans<br>cri<br>pti<br>on<br>fac<br>tor | 27<br>8 | 0<br>.<br>4<br>6<br>3 | 0<br>.<br>8<br>4<br>6 | 0.<br>9<br>7<br>5<br>3           | 0.<br>05 |  | 1       | 5 | 0 | 19<br>96 | 2<br>0<br>1<br>7 |
| Rh<br>eu<br>ma<br>toi<br>d<br>Ar<br>thr<br>itis | C<br>00<br>03<br>87<br>3 | MT<br>OR       | 2<br>4<br>7<br>5      | P4234<br>5 | mechani<br>stic<br>target of<br>rapamyc<br>in kinase                           | Ki<br>nas<br>e                              | 96<br>0 | 0<br>.<br>3<br>4<br>3 | 0<br>.<br>8<br>8<br>5 | 1                                | 0.<br>05 |  | 1       | 5 | 0 | 20<br>17 | 2<br>0<br>1<br>9 |
| Rh<br>eu<br>ma<br>toi<br>d<br>Ar<br>thr<br>itis | C<br>00<br>03<br>87<br>3 | AC<br>AD<br>8  | 2<br>7<br>0<br>3<br>4 | Q9U<br>KU7 | acyl-<br>CoA<br>dehydro<br>genase<br>family<br>member<br>8                     | En<br>zy<br>me                              | 20<br>3 | 0<br>.<br>5<br>0<br>6 | 0<br>.<br>8<br>8<br>5 | 5.<br>6<br>4<br>E<br>-<br>1<br>4 | 0.<br>05 |  | 0.<br>8 | 5 | 0 | 20<br>17 | 2<br>0<br>1<br>9 |
| Rh<br>eu<br>ma<br>toi<br>d<br>Ar<br>thr<br>itis | C<br>00<br>03<br>87<br>3 | B3<br>GA<br>T1 | 2<br>7<br>0<br>8<br>7 | Q9P2<br>W7 | beta-1,3-<br>glucuron<br>yltransfe<br>rase 1                                   | En<br>zy<br>me                              | 19<br>9 | 0<br>.<br>4<br>9<br>4 | 0<br>.<br>7<br>6<br>9 | 0.<br>1<br>3<br>5<br>2<br>1      | 0.<br>05 |  | 1       | 5 | 0 | 19<br>90 | 1<br>9<br>9<br>8 |
| Rh<br>eu<br>ma<br>toi<br>d<br>Ar<br>thr<br>itis | C<br>00<br>03<br>87<br>3 | GS<br>TM<br>2  | 2<br>9<br>4<br>6      | P2816<br>1 | glutathione S-<br>transferase mu<br>2                                          |                                             | 19<br>5 | 0<br>.<br>4<br>8<br>8 | 0<br>.<br>8<br>0<br>8 | 3.<br>3<br>9<br>E<br>-<br>0<br>7 | 0.<br>05 |  | 1       | 5 | 0 | 20<br>02 | 2<br>0<br>1<br>8 |
| Rh<br>eu<br>ma<br>toi<br>d<br>Ar<br>thr<br>itis | C<br>00<br>03<br>87<br>3 | GS<br>TP<br>1  | 2<br>9<br>5<br>0      | P0921<br>1 | glutathione S-<br>transferase pi<br>1                                          |                                             | 61<br>0 | 0<br>.<br>3<br>8<br>3 | 0<br>.<br>9<br>2<br>3 | 0.<br>0<br>1<br>4<br>1<br>5<br>5 | 0.<br>05 |  | 0.<br>8 | 5 | 0 | 19<br>99 | 2<br>0<br>1<br>2 |
| Rh<br>eu<br>ma<br>toi                           | C<br>00<br>03            | TN<br>C        | 3<br>3<br>7<br>1      | P2482<br>1 | tenascin C                                                                     |                                             | 36<br>9 | 0<br>.<br>4           | 0<br>.<br>8           | 1.<br>2<br>6<br>E                | 0.<br>05 |  | 1       | 5 | 0 | 20<br>05 | 2<br>0<br>1<br>8 |

|                                                 |                          |                       |                            |            |                                                                 |                |          |                       |                       |                                  |          |  |         |   |   |          |                  |
|-------------------------------------------------|--------------------------|-----------------------|----------------------------|------------|-----------------------------------------------------------------|----------------|----------|-----------------------|-----------------------|----------------------------------|----------|--|---------|---|---|----------|------------------|
| d<br>Ar<br>thr<br>itis                          | 87<br>3                  |                       |                            |            |                                                                 |                |          | 3<br>3                | 4<br>6                | -<br>0<br>7                      |          |  |         |   |   |          |                  |
| Rh<br>eu<br>ma<br>toi<br>d<br>Ar<br>thr<br>itis | C<br>00<br>03<br>87<br>3 | AP<br>OE              | 3<br>4<br>8                | P0264<br>9 | apolipoprotein<br>E                                             |                | 10<br>49 | 0<br>.<br>3<br>3<br>8 | 0<br>.<br>9<br>6<br>2 | 0.<br>0<br>0<br>1<br>8<br>6<br>9 | 0.<br>05 |  | 1       | 5 | 0 | 19<br>96 | 2<br>0<br>1<br>3 |
| Rh<br>eu<br>ma<br>toi<br>d<br>Ar<br>thr<br>itis | C<br>00<br>03<br>87<br>3 | IGF<br>1R             | 3<br>4<br>8<br>0           | P0806<br>9 | insulin<br>like<br>growth<br>factor 1<br>receptor               | Ki<br>nas<br>e | 55<br>6  | 0<br>.<br>3<br>9<br>9 | 0<br>.<br>8<br>8<br>5 | 0.<br>9<br>6<br>7<br>9<br>9      | 0.<br>05 |  | 1       | 5 | 0 | 20<br>14 | 2<br>0<br>1<br>9 |
| Rh<br>eu<br>ma<br>toi<br>d<br>Ar<br>thr<br>itis | C<br>00<br>03<br>87<br>3 | LI<br>NC<br>011<br>93 | 3<br>4<br>8<br>1<br>2<br>0 |            | long<br>intergenic<br>non-protein<br>coding RNA<br>1193         |                | 91       | 0<br>.<br>5<br>6<br>5 | 0<br>.<br>6<br>9<br>2 |                                  | 0.<br>05 |  | 1       | 5 | 0 | 20<br>04 | 2<br>0<br>1<br>3 |
| Rh<br>eu<br>ma<br>toi<br>d<br>Ar<br>thr<br>itis | C<br>00<br>03<br>87<br>3 | IG<br>HG<br>3         | 3<br>5<br>0<br>2           | P0186<br>0 | immunoglobul<br>in heavy<br>constant<br>gamma 3<br>(G3m marker) |                | 16<br>1  | 0<br>.<br>5<br>1<br>3 | 0<br>.<br>7<br>6<br>9 |                                  | 0.<br>05 |  | 1       | 5 | 0 | 19<br>97 | 2<br>0<br>2<br>0 |
| Rh<br>eu<br>ma<br>toi<br>d<br>Ar<br>thr<br>itis | C<br>00<br>03<br>87<br>3 | IL1<br>2A             | 3<br>5<br>9<br>2           | P2945<br>9 | interleukin<br>12A                                              |                | 26<br>1  | 0<br>.<br>4<br>9<br>1 | 0<br>.<br>8<br>0<br>8 | 0.<br>0<br>4<br>7<br>4<br>6      | 0.<br>05 |  | 1       | 5 | 1 | 20<br>12 | 2<br>0<br>1<br>9 |
| Rh<br>eu<br>ma<br>toi<br>d<br>Ar<br>thr<br>itis | C<br>00<br>03<br>87<br>3 | IT<br>GA<br>M         | 3<br>6<br>8<br>4           | P1121<br>5 | integrin<br>subunit alpha<br>M                                  |                | 34<br>3  | 0<br>.<br>4<br>4<br>3 | 0<br>.<br>8<br>0<br>8 | 3.<br>3<br>1<br>E<br>-<br>1<br>1 | 0.<br>05 |  | 0.<br>8 | 5 | 1 | 20<br>09 | 2<br>0<br>1<br>9 |

|                      |          |        |        |        |                                                        |                      |     |       |       |          |      |  |     |   |   |      |      |
|----------------------|----------|--------|--------|--------|--------------------------------------------------------|----------------------|-----|-------|-------|----------|------|--|-----|---|---|------|------|
| Rheumatoid Arthritis | C0003873 | ITGB1  | 3688   | P05556 | integrin subunit beta 1                                | Receptor             | 210 | 0.496 | 0.808 | 0.90208  | 0.05 |  | 1   | 5 | 0 | 1993 | 2019 |
| Rheumatoid Arthritis | C0003873 | JUNB   | 3726   | P17275 | JunB proto-oncogene, AP-1 transcription factor subunit | Transcription factor | 264 | 0.467 | 0.769 | 0.86299  | 0.05 |  | 1   | 5 | 0 | 1996 | 2017 |
| Rheumatoid Arthritis | C0003873 | JUND   | 3727   | P17535 | JunD proto-oncogene, AP-1 transcription factor subunit | Transcription factor | 242 | 0.475 | 0.808 | 0.70054  | 0.05 |  | 1   | 5 | 0 | 1996 | 2017 |
| Rheumatoid Arthritis | C0003873 | GSTK1  | 373156 | Q9Y2Q3 | glutathione S-transferase kappa 1                      |                      | 445 | 0.412 | 0.885 | 1.94E-06 | 0.05 |  | 0.8 | 5 | 0 | 1999 | 2011 |
| Rheumatoid Arthritis | C0003873 | KLRB1  | 3820   | Q12918 | killer cell lectin like receptor B1                    |                      | 71  | 0.601 | 0.615 | 2.41E-07 | 0.05 |  | 1   | 5 | 0 | 2010 | 2019 |
| Rheumatoid Arthritis | C0003873 | RPSA   | 3921   | P08865 | ribosomal protein SA                                   | Nucleic acid binding | 221 | 0.485 | 0.769 | 0.93037  | 0.05 |  | 1   | 5 | 0 | 2000 | 2019 |
| Rheumatoid Ar        | C0003873 | LGALS1 | 3956   | P09382 | galectin 1                                             | Signaling            | 362 | 0.435 | 0.846 | 0.0444   | 0.05 |  | 1   | 5 | 0 | 2003 | 2019 |

|                                                 |                          |                |                            |            |                                                                  |                                                |         |                       |                       |                             |          |  |   |   |   |          |                  |
|-------------------------------------------------|--------------------------|----------------|----------------------------|------------|------------------------------------------------------------------|------------------------------------------------|---------|-----------------------|-----------------------|-----------------------------|----------|--|---|---|---|----------|------------------|
| thr<br>itis                                     |                          |                |                            |            |                                                                  |                                                |         |                       | 8<br>8                |                             |          |  |   |   |   |          |                  |
| Rh<br>eu<br>ma<br>toi<br>d<br>Ar<br>thr<br>itis | C<br>00<br>03<br>87<br>3 | MI<br>R1<br>26 | 4<br>0<br>6<br>9<br>1<br>3 |            | microRNA<br>126                                                  |                                                | 30<br>5 | 0<br>.<br>4<br>4<br>7 | 0<br>.<br>8<br>4<br>6 |                             | 0.<br>05 |  | 1 | 5 | 0 | 20<br>15 | 2<br>0<br>1<br>8 |
| Rh<br>eu<br>ma<br>toi<br>d<br>Ar<br>thr<br>itis | C<br>00<br>03<br>87<br>3 | MI<br>R2<br>2  | 4<br>0<br>7<br>0<br>0<br>4 |            | microRNA 22                                                      |                                                | 19<br>5 | 0<br>.<br>4<br>9<br>6 | 0<br>.<br>8<br>0<br>8 |                             | 0.<br>05 |  | 1 | 5 | 0 | 20<br>14 | 2<br>0<br>2<br>0 |
| Rh<br>eu<br>ma<br>toi<br>d<br>Ar<br>thr<br>itis | C<br>00<br>03<br>87<br>3 | MI<br>R2<br>21 | 4<br>0<br>7<br>0<br>0<br>6 |            | microRNA<br>221                                                  |                                                | 30<br>4 | 0<br>.<br>4<br>4<br>9 | 0<br>.<br>8<br>4<br>6 |                             | 0.<br>05 |  | 1 | 5 | 0 | 20<br>12 | 2<br>0<br>2<br>0 |
| Rh<br>eu<br>ma<br>toi<br>d<br>Ar<br>thr<br>itis | C<br>00<br>03<br>87<br>3 | MI<br>R3<br>4A | 4<br>0<br>7<br>0<br>4<br>0 |            | microRNA<br>34a                                                  |                                                | 42<br>8 | 0<br>.<br>4<br>2<br>1 | 0<br>.<br>8<br>4<br>6 |                             | 0.<br>05 |  | 1 | 5 | 0 | 20<br>12 | 2<br>0<br>1<br>9 |
| Rh<br>eu<br>ma<br>toi<br>d<br>Ar<br>thr<br>itis | C<br>00<br>03<br>87<br>3 | MC<br>L1       | 4<br>1<br>7<br>0           | Q078<br>20 | MCL1<br>apoptosi<br>s<br>regulato<br>r, BCL2<br>family<br>member | Sig<br>nal<br>ing                              | 37<br>5 | 0<br>.<br>4<br>3      | 0<br>.<br>8<br>0<br>8 | 0.<br>9<br>6<br>3<br>4<br>9 | 0.<br>05 |  | 1 | 5 | 0 | 20<br>05 | 2<br>0<br>1<br>9 |
| Rh<br>eu<br>ma<br>toi<br>d<br>Ar<br>thr<br>itis | C<br>00<br>03<br>87<br>3 | MD<br>M2       | 4<br>1<br>9<br>3           | Q009<br>87 | MDM2<br>proto-<br>oncogen<br>e                                   | Nu<br>cle<br>ic<br>aci<br>d<br>bin<br>din<br>g | 70<br>2 | 0<br>.<br>3<br>6<br>2 | 0<br>.<br>8<br>4<br>6 | 0.<br>9<br>9<br>9<br>8<br>1 | 0.<br>05 |  | 1 | 5 | 1 | 20<br>05 | 2<br>0<br>1<br>6 |
| Rh<br>eu<br>ma<br>toi                           | C<br>00<br>03            | CX<br>CL<br>9  | 4<br>2<br>8<br>3           | Q073<br>25 | C-X-C<br>motif<br>chemoki                                        | Sig<br>nal<br>ing                              | 26<br>9 | 0<br>.<br>4           | 0<br>.<br>8           | 0.<br>0<br>0<br>2           | 0.<br>05 |  | 1 | 5 | 1 | 20<br>03 | 2<br>0<br>1<br>5 |

|                                                 |                          |                     |                       |            |                                                                  |                                             |          |                       |                       |                                  |          |  |         |   |   |          |                  |
|-------------------------------------------------|--------------------------|---------------------|-----------------------|------------|------------------------------------------------------------------|---------------------------------------------|----------|-----------------------|-----------------------|----------------------------------|----------|--|---------|---|---|----------|------------------|
| d<br>Ar<br>thr<br>itis                          | 87<br>3                  |                     |                       |            | ne<br>ligand 9                                                   |                                             |          | 6<br>2                | 0<br>8                | 9<br>3                           |          |  |         |   |   |          |                  |
| Rh<br>eu<br>ma<br>toi<br>d<br>Ar<br>thr<br>itis | C<br>00<br>03<br>87<br>3 | NF<br>AT<br>C1      | 4<br>7<br>7<br>2      | O956<br>44 | nuclear<br>factor of<br>activate<br>d T cells<br>1               | Tr<br>ans<br>cri<br>pti<br>on<br>fac<br>tor | 16<br>1  | 0<br>.<br>5<br>1<br>7 | 0<br>.<br>7<br>3<br>1 | 0.<br>1<br>5<br>6<br>5<br>2      | 0.<br>05 |  | 1       | 5 | 0 | 20<br>07 | 2<br>0<br>1<br>9 |
| Rh<br>eu<br>ma<br>toi<br>d<br>Ar<br>thr<br>itis | C<br>00<br>03<br>87<br>3 | NR<br>4A<br>2       | 4<br>9<br>2<br>9      | P4335<br>4 | nuclear<br>receptor<br>subfamil<br>y 4<br>group A<br>member<br>2 | Nu<br>cle<br>ar<br>rec<br>ept<br>or         | 16<br>6  | 0<br>.<br>5<br>2<br>9 | 0<br>.<br>8<br>4<br>6 | 0.<br>9<br>9<br>9<br>5<br>9      | 0.<br>05 |  | 1       | 5 | 0 | 20<br>01 | 2<br>0<br>1<br>3 |
| Rh<br>eu<br>ma<br>toi<br>d<br>Ar<br>thr<br>itis | C<br>00<br>03<br>87<br>3 | HS<br>PA<br>14      | 5<br>1<br>1<br>8<br>2 | Q0V<br>DF9 | heat shock<br>protein family<br>A (Hsp70)<br>member 14           |                                             | 17<br>8  | 0<br>.<br>5<br>0<br>2 | 0<br>.<br>7<br>6<br>9 | 0.<br>6<br>7<br>3<br>5<br>9      | 0.<br>05 |  | 1       | 5 | 0 | 20<br>07 | 2<br>0<br>1<br>9 |
| Rh<br>eu<br>ma<br>toi<br>d<br>Ar<br>thr<br>itis | C<br>00<br>03<br>87<br>3 | PL<br>A2<br>G1<br>B | 5<br>3<br>1<br>9      | P0405<br>4 | phospho<br>lipase<br>A2<br>group IB                              | En<br>zy<br>me                              | 26<br>8  | 0<br>.<br>4<br>6<br>8 | 0<br>.<br>8<br>4<br>6 | 1.<br>0<br>1<br>E<br>-<br>1<br>0 | 0.<br>05 |  | 1       | 5 | 0 | 19<br>91 | 2<br>0<br>1<br>1 |
| Rh<br>eu<br>ma<br>toi<br>d<br>Ar<br>thr<br>itis | C<br>00<br>03<br>87<br>3 | PL<br>AU            | 5<br>3<br>2<br>8      | P0074<br>9 | plasmin<br>ogen<br>activator<br>,<br>urokinas<br>e               | En<br>zy<br>me                              | 43<br>9  | 0<br>.<br>4<br>2<br>5 | 0<br>.<br>9<br>2<br>3 | 2.<br>3<br>1<br>E<br>-<br>0<br>6 | 0.<br>05 |  | 1       | 5 | 0 | 20<br>00 | 2<br>0<br>1<br>8 |
| Rh<br>eu<br>ma<br>toi<br>d<br>Ar<br>thr<br>itis | C<br>00<br>03<br>87<br>3 | PT<br>EN            | 5<br>7<br>2<br>8      | P6048<br>4 | phospha<br>tase and<br>tensin<br>homolog                         | En<br>zy<br>me                              | 13<br>49 | 0<br>.<br>3<br>0<br>5 | 0<br>.<br>9<br>2<br>3 | 0.<br>2<br>5<br>6<br>5<br>1      | 0.<br>05 |  | 0.<br>6 | 5 | 0 | 19<br>86 | 2<br>0<br>1<br>7 |
| Rh<br>eu                                        | C<br>00                  | PT<br>H             | 5<br>7                | P0127<br>0 | parathyroid<br>hormone                                           |                                             | 52<br>8  | 0<br>.<br>.           | 0<br>.<br>.           | 0.<br>0<br>0                     | 0.<br>05 |  | 1       | 5 | 0 | 20<br>01 | 2<br>0           |



|                                                 |                          |                      |                       |            |                                                                    |                                                |         |                       |                                 |                                  |          |  |         |   |   |          |                  |
|-------------------------------------------------|--------------------------|----------------------|-----------------------|------------|--------------------------------------------------------------------|------------------------------------------------|---------|-----------------------|---------------------------------|----------------------------------|----------|--|---------|---|---|----------|------------------|
| ma<br>toi<br>d<br>Ar<br>thr<br>itis             | 03<br>87<br>3            |                      | 4<br>1                |            |                                                                    |                                                |         | 3<br>9<br>7           | 8<br>4<br>6                     | 1<br>2<br>0<br>9<br>3            |          |  |         |   |   |          | 1<br>9           |
| Rh<br>eu<br>ma<br>toi<br>d<br>Ar<br>thr<br>itis | C<br>00<br>03<br>87<br>3 | CX<br>CL<br>16       | 5<br>8<br>1<br>9<br>1 | Q9H2<br>A7 | C-X-C<br>motif<br>chemoki<br>ne<br>ligand<br>16                    | Sig<br>nal<br>ing                              | 17<br>8 | 0<br>.<br>5<br>0<br>2 | 0<br>.<br>7<br>6<br>9           | 3.<br>4<br>5<br>E<br>-<br>0<br>5 | 0.<br>05 |  | 1       | 5 | 0 | 20<br>05 | 2<br>0<br>1<br>6 |
| Rh<br>eu<br>ma<br>toi<br>d<br>Ar<br>thr<br>itis | C<br>00<br>03<br>87<br>3 | RA<br>C1             | 5<br>8<br>7<br>9      | P6300<br>0 | Rac<br>family<br>small<br>GTPase<br>1                              | En<br>zy<br>me<br>mo<br>dul<br>ato<br>r        | 41<br>5 | 0<br>.<br>4<br>2<br>9 | 0<br>.<br>9<br>6<br>2<br>2<br>8 | 0.<br>7<br>6<br>2<br>2<br>8      | 0.<br>05 |  | 1       | 5 | 0 | 20<br>07 | 2<br>0<br>1<br>9 |
| Rh<br>eu<br>ma<br>toi<br>d<br>Ar<br>thr<br>itis | C<br>00<br>03<br>87<br>3 | RA<br>RR<br>ES<br>2  | 5<br>9<br>1<br>9      | Q999<br>69 | retinoic acid<br>receptor<br>responder 2                           |                                                | 18<br>0 | 0<br>.<br>5<br>1<br>9 | 0<br>.<br>7<br>3<br>1           | 2.<br>7<br>2<br>E<br>-<br>0<br>5 | 0.<br>05 |  | 1       | 5 | 0 | 20<br>12 | 2<br>0<br>1<br>9 |
| Rh<br>eu<br>ma<br>toi<br>d<br>Ar<br>thr<br>itis | C<br>00<br>03<br>87<br>3 | TN<br>FR<br>SF1<br>7 | 6<br>0<br>8           | Q022<br>23 | TNF<br>receptor<br>superfa<br>mily<br>member<br>17                 | Re<br>ce<br>pto<br>r                           | 81      | 0<br>.<br>5<br>8<br>8 | 0<br>.<br>6<br>9<br>2           | 1.<br>3<br>7<br>E<br>-<br>0<br>6 | 0.<br>05 |  | 1       | 5 | 0 | 20<br>01 | 2<br>0<br>1<br>9 |
| Rh<br>eu<br>ma<br>toi<br>d<br>Ar<br>thr<br>itis | C<br>00<br>03<br>87<br>3 | RO<br>S1             | 6<br>0<br>9<br>8      | P0892<br>2 | ROS<br>proto-<br>oncogen<br>e 1,<br>receptor<br>tyrosine<br>kinase | Ki<br>nas<br>e                                 | 35<br>6 | 0<br>.<br>4<br>3<br>9 | 0<br>.<br>8<br>8<br>5           | 1.<br>6<br>2<br>E<br>-<br>7<br>2 | 0.<br>05 |  | 0.<br>8 | 5 | 0 | 20<br>17 | 2<br>0<br>1<br>9 |
| Rh<br>eu<br>ma<br>toi<br>d<br>Ar<br>thr<br>itis | C<br>00<br>03<br>87<br>3 | S10<br>0A<br>4       | 6<br>2<br>7<br>5      | P2644<br>7 | S100<br>calcium<br>binding<br>protein<br>A4                        | Ca<br>lci<br>um<br>-<br>bin<br>din<br>g<br>pro | 30<br>8 | 0<br>.<br>4<br>4<br>8 | 0<br>.<br>7<br>6<br>9           | 0.<br>0<br>6<br>6<br>1<br>8<br>4 | 0.<br>05 |  | 1       | 5 | 0 | 20<br>06 | 2<br>0<br>1<br>9 |

|                      |          |         |      |        |                                                  |                         |     |        |           |      |  |     |   |   |      |      |  |
|----------------------|----------|---------|------|--------|--------------------------------------------------|-------------------------|-----|--------|-----------|------|--|-----|---|---|------|------|--|
|                      |          |         |      |        |                                                  | tein                    |     |        |           |      |  |     |   |   |      |      |  |
| Rheumatoid Arthritis | C0003873 | S100A12 | 6283 | P80511 | S100 calcium binding protein A12                 | Calcium-binding protein | 221 | 0.4888 | 0.48234   | 0.05 |  | 1   | 5 | 0 | 2005 | 2019 |  |
| Rheumatoid Arthritis | C0003873 | SP1     | 6667 | P08047 | Sp1 transcription factor                         | Nucleic acid binding    | 209 | 0.493  | 0.79997   | 0.05 |  | 1   | 5 | 0 | 2017 | 2019 |  |
| Rheumatoid Arthritis | C0003873 | MAP3K7  | 6885 | O43318 | mitogen-activated protein kinase kinase kinase 7 | Kinase                  | 273 | 0.477  | 0.8971    | 0.05 |  | 1   | 5 | 0 | 2004 | 2020 |  |
| Rheumatoid Arthritis | C0003873 | TREB    | 6957 | P0DSE2 | T cell receptor beta locus                       |                         | 49  | 0.636  | 0.538     | 0.05 |  | 0.8 | 5 | 0 | 1994 | 2003 |  |
| Rheumatoid Arthritis | C0003873 | TSPO    | 706  | P30536 | translocator protein                             |                         | 341 | 0.444  | 0.80274   | 0.05 |  | 1   | 5 | 0 | 2017 | 2020 |  |
| Rheumatoid Arthritis | C0003873 | TM7SF2  | 7108 | O76062 | transmembrane 7 superfamily member 2             | Enzyme                  | 217 | 0.486  | 0.807E-07 | 0.05 |  | 1   | 5 | 0 | 2002 | 2012 |  |

|                      |          |              |       |        |                                      |                  |     |        |        |          |      |  |     |   |   |      |      |
|----------------------|----------|--------------|-------|--------|--------------------------------------|------------------|-----|--------|--------|----------|------|--|-----|---|---|------|------|
| Rheumatoid Arthritis | C0003873 | VP S51       | 738   | Q9UID3 | VPS51 subunit of GARP complex        |                  | 292 | 0.452  | 0.86   | 1.05E-08 | 0.05 |  | 1   | 5 | 0 | 2002 | 2016 |
| Rheumatoid Arthritis | C0003873 | VE GFC       | 7424  | P49767 | vascular endothelial growth factor C | Signaling        | 291 | 0.459  | 0.769  | 0.49565  | 0.05 |  | 1   | 5 | 0 | 2002 | 2019 |
| Rheumatoid Arthritis | C0003873 | DH X40       | 79665 | Q8IX18 | DEAH-box helicase 40                 | Enzyme           | 64  | 0.68   | 0.769  | 0.756    | 0.05 |  | 1   | 5 | 0 | 2007 | 2019 |
| Rheumatoid Arthritis | C0003873 | TS LP        | 85480 | Q969D9 | thymic stromal lymphopoietin         |                  | 220 | 0.486  | 0.808  | 0.04036  | 0.05 |  | 1   | 5 | 0 | 2014 | 2018 |
| Rheumatoid Arthritis | C0003873 | SO CS1       | 8651  | O15524 | suppressor of cytokine signaling 1   | Enzyme modulator | 315 | 0.455  | 0.884  | 0.5844   | 0.05 |  | 1   | 5 | 0 | 2004 | 2012 |
| Rheumatoid Arthritis | C0003873 | TN FS F10    | 8743  | P50591 | TNF superfamily member 10            | Signaling        | 445 | 0.4135 | 0.8495 | 0.13495  | 0.05 |  | 1   | 5 | 0 | 2009 | 2017 |
| Rheumatoid Ar        | C0003873 | TN FR SF1 0A | 8797  | O00220 | TNF receptor superfamily member 10a  |                  | 155 | 0.521  | 0.731  | 5.77E-1  | 0.05 |  | 0.8 | 5 | 1 | 1989 | 2012 |

|                                                 |                          |                     |                  |            |                                                                                 |                   |         |                       |                       |                                  |          |  |              |   |   |                    |
|-------------------------------------------------|--------------------------|---------------------|------------------|------------|---------------------------------------------------------------------------------|-------------------|---------|-----------------------|-----------------------|----------------------------------|----------|--|--------------|---|---|--------------------|
| thr<br>itis                                     |                          |                     |                  |            |                                                                                 |                   |         |                       | 1<br>5                |                                  |          |  |              |   |   |                    |
| Rh<br>eu<br>ma<br>toi<br>d<br>Ar<br>thr<br>itis | C<br>00<br>03<br>87<br>3 | CF<br>LA<br>R       | 8<br>8<br>3<br>7 | O155<br>19 | CASP8<br>and<br>FADD<br>like<br>apoptosi<br>s<br>regulato<br>r                  | En<br>zy<br>me    | 21<br>5 | 0<br>.<br>4<br>8<br>5 | 0<br>.<br>8<br>4<br>6 | 0.<br>9<br>9<br>6<br>7           | 0.<br>05 |  | 1            | 5 | 0 | 20<br>00<br>1<br>7 |
| Rh<br>eu<br>ma<br>toi<br>d<br>Ar<br>thr<br>itis | C<br>00<br>03<br>87<br>3 | SQ<br>ST<br>M1      | 8<br>8<br>7<br>8 | Q135<br>01 | sequestosome<br>1                                                               |                   | 47<br>0 | 0<br>.<br>4<br>2<br>8 | 0<br>.<br>8<br>8<br>5 | 0.<br>0<br>0<br>0<br>8<br>6      | 0.<br>05 |  | 1            | 5 | 0 | 20<br>05<br>1<br>9 |
| Rh<br>eu<br>ma<br>toi<br>d<br>Ar<br>thr<br>itis | C<br>00<br>03<br>87<br>3 | CD<br>80            | 9<br>4<br>1      | P3368<br>1 | CD80<br>molecule                                                                |                   | 23<br>3 | 0<br>.<br>4<br>7<br>5 | 0<br>.<br>7<br>6<br>9 | 0.<br>0<br>1<br>0<br>8<br>9<br>8 | 0.<br>05 |  | 1            | 5 | 0 | 20<br>00<br>1<br>8 |
| Rh<br>eu<br>ma<br>toi<br>d<br>Ar<br>thr<br>itis | C<br>00<br>03<br>87<br>3 | AD<br>AM<br>TS<br>4 | 9<br>5<br>0<br>7 | O751<br>73 | ADAM<br>metallop<br>eptidase<br>with<br>thrombo<br>spondin<br>type 1<br>motif 4 | En<br>zy<br>me    | 84      | 0<br>.<br>5<br>8<br>2 | 0<br>.<br>6<br>9<br>2 | 1.<br>9<br>5<br>E<br>-<br>0<br>6 | 0.<br>05 |  | 1            | 5 | 0 | 20<br>02<br>1<br>5 |
| Rh<br>eu<br>ma<br>toi<br>d<br>Ar<br>thr<br>itis | C<br>00<br>03<br>87<br>3 | GD<br>F15           | 9<br>5<br>1<br>8 | Q999<br>88 | growth<br>different<br>iation<br>factor 15                                      | Sig<br>nal<br>ing | 38<br>9 | 0<br>.<br>4<br>2<br>9 | 0<br>.<br>8<br>0<br>8 | 3.<br>0<br>1<br>E<br>-<br>0<br>7 | 0.<br>05 |  | 1            | 5 | 1 | 20<br>07<br>1<br>9 |
| Rh<br>eu<br>ma<br>toi<br>d<br>Ar<br>thr<br>itis | C<br>00<br>03<br>87<br>3 | CD<br>38            | 9<br>5<br>2      | P2890<br>7 | CD38<br>molecul<br>e                                                            | En<br>zy<br>me    | 47<br>3 | 0<br>.<br>4<br>0<br>7 | 0<br>.<br>8<br>8<br>5 | 2.<br>3<br>1<br>E<br>-<br>0<br>6 | 0.<br>05 |  | 1            | 5 | 0 | 20<br>03<br>1<br>9 |
| Rh<br>eu<br>ma<br>toi                           | C<br>00<br>03            | HO<br>TA<br>IR      | 1<br>E<br>+      |            | HOX<br>transcript<br>antisense<br>RNA                                           |                   | 23<br>4 | 0<br>.<br>4           | 0<br>.<br>7           |                                  | 0.<br>04 |  | 0.<br>7<br>5 | 4 | 0 | 20<br>17<br>1<br>9 |

|                                                 |                          |                |                       |            |                                                           |               |         |                       |                       |                                  |          |  |   |   |   |          |                  |
|-------------------------------------------------|--------------------------|----------------|-----------------------|------------|-----------------------------------------------------------|---------------|---------|-----------------------|-----------------------|----------------------------------|----------|--|---|---|---|----------|------------------|
| d<br>Ar<br>thr<br>itis                          | 87<br>3                  |                | 0<br>8                |            |                                                           |               |         | 7<br>5                | 6<br>9                |                                  |          |  |   |   |   |          |                  |
| Rh<br>eu<br>ma<br>toi<br>d<br>Ar<br>thr<br>itis | C<br>00<br>03<br>87<br>3 | ZG<br>LP<br>1  | 1<br>E<br>+<br>0<br>8 | P0C6<br>A0 | zinc finger<br>GATA like<br>protein 1                     |               | 18<br>6 | 0<br>.<br>5<br>1<br>2 | 0<br>.<br>8<br>0<br>8 | 0.<br>3<br>8<br>6<br>8           | 0.<br>04 |  | 1 | 4 | 0 | 20<br>17 | 2<br>0<br>1<br>8 |
| Rh<br>eu<br>ma<br>toi<br>d<br>Ar<br>thr<br>itis | C<br>00<br>03<br>87<br>3 | IL1<br>8B<br>P | 1<br>0<br>0<br>6<br>8 | O959<br>98 | interleukin 18<br>binding<br>protein                      |               | 75      | 0<br>.<br>6<br>0<br>3 | 0<br>.<br>7<br>3<br>1 | 1.<br>4<br>8<br>E<br>-<br>0<br>8 | 0.<br>04 |  | 1 | 4 | 0 | 20<br>03 | 2<br>0<br>1<br>6 |
| Rh<br>eu<br>ma<br>toi<br>d<br>Ar<br>thr<br>itis | C<br>00<br>03<br>87<br>3 | NA<br>MP<br>T  | 1<br>0<br>1<br>3<br>5 | P4349<br>0 | nicotina<br>mide<br>phospho<br>ribosyltr<br>ansferas<br>e | Signal<br>ing | 19<br>9 | 0<br>.<br>5<br>0<br>2 | 0<br>.<br>8<br>0<br>8 | 0.<br>9<br>7<br>9<br>1<br>4      | 0.<br>04 |  | 1 | 4 | 2 | 20<br>11 | 2<br>0<br>1<br>7 |
| Rh<br>eu<br>ma<br>toi<br>d<br>Ar<br>thr<br>itis | C<br>00<br>03<br>87<br>3 | RA<br>BE<br>PK | 1<br>0<br>2<br>4<br>4 | Q7Z6<br>M1 | Rab9 effector<br>protein with<br>kelch motifs             |               | 11<br>2 | 0<br>.<br>5<br>5<br>3 | 0<br>.<br>6<br>9<br>2 | 2.<br>8<br>4<br>E<br>-<br>1<br>1 | 0.<br>04 |  | 1 | 4 | 0 | 20<br>00 | 2<br>0<br>1<br>8 |
| Rh<br>eu<br>ma<br>toi<br>d<br>Ar<br>thr<br>itis | C<br>00<br>03<br>87<br>3 | LA<br>NC<br>L1 | 1<br>0<br>3<br>1<br>4 | O438<br>13 | LanC like 1                                               |               | 11<br>3 | 0<br>.<br>5<br>5<br>2 | 0<br>.<br>6<br>9<br>2 | 1.<br>0<br>8<br>E<br>-<br>1<br>1 | 0.<br>04 |  | 1 | 4 | 0 | 20<br>00 | 2<br>0<br>1<br>8 |
| Rh<br>eu<br>ma<br>toi<br>d<br>Ar<br>thr<br>itis | C<br>00<br>03<br>87<br>3 | CD<br>KN<br>2D | 1<br>0<br>3<br>2      | P5527<br>3 | cyclin<br>dependent<br>kinase<br>inhibitor 2D             |               | 11<br>0 | 0<br>.<br>5<br>4<br>7 | 0<br>.<br>7<br>6<br>9 | 0.<br>4<br>9<br>4<br>7<br>3      | 0.<br>04 |  | 1 | 4 | 0 | 19<br>89 | 2<br>0<br>0<br>9 |
| Rh<br>eu                                        | C<br>00                  | NX<br>F1       | 1<br>0                | Q9UB<br>U9 | nuclear<br>RNA                                            | Nu<br>cle     | 14<br>1 | 0<br>.<br>.           | 0<br>.<br>.           | 0.<br>9                          | 0.<br>04 |  | 1 | 4 | 0 | 19<br>94 | 2<br>0           |

|                         |          |              |          |        |                                                                    |                            |     |        |       |          |      |  |    |   |      |      |
|-------------------------|----------|--------------|----------|--------|--------------------------------------------------------------------|----------------------------|-----|--------|-------|----------|------|--|----|---|------|------|
| matoid<br>Arthritis     | 03873    |              | 482      |        | export factor 1                                                    | ic acid binding            |     | 531    | 885   | 763      |      |  |    |   |      | 00   |
| Rheumatoid<br>Arthritis | C0003873 | LOC105379528 | 1.05E+08 |        | uncharacterized LOC105379528                                       |                            | 55  | 0.617  | 0.615 |          | 0.04 |  | 14 | 0 | 1995 | 2007 |
| Rheumatoid<br>Arthritis | C0003873 | KHDRBS1      | 10657    | Q07666 | KH RNA binding domain containing, signal transduction associated 1 | Nucleic acid binding       | 289 | 0.457  | 0.486 | 0.99423  | 0.04 |  | 14 | 0 | 2018 | 2019 |
| Rheumatoid<br>Arthritis | C0003873 | CXCR6        | 10663    | O00574 | C-X-C motif chemokine receptor 6                                   | G-protein coupled receptor | 325 | 0.4488 | 0.485 | 5.72E-05 | 0.04 |  | 14 | 0 | 1999 | 2016 |
| Rheumatoid<br>Arthritis | C0003873 | MALT1        | 10892    | Q9UDY8 | MALT1 paracaspase                                                  | Enzyme                     | 148 | 0.532  | 0.769 | 0.98651  | 0.04 |  | 14 | 0 | 2014 | 2019 |
| Rheumatoid<br>Arthritis | C0003873 | EBNA1BP2     | 10969    | Q99848 | EBNA1 binding protein 2                                            |                            | 116 | 0.55   | 0.692 | 1.37E-09 | 0.04 |  | 14 | 0 | 2000 | 2018 |
| Rheumatoid<br>Arthritis | C0003873 | H3P13        | 1.15     |        | H3 histone pseudogene 13                                           |                            | 78  | 0.5    | 0.7   |          | 0.04 |  | 14 | 0 | 1989 | 20   |

|                                                 |                          |                      |                                  |            |                                                |                                                              |                       |                       |                                  |                                  |          |   |   |   |          |                  |                  |
|-------------------------------------------------|--------------------------|----------------------|----------------------------------|------------|------------------------------------------------|--------------------------------------------------------------|-----------------------|-----------------------|----------------------------------|----------------------------------|----------|---|---|---|----------|------------------|------------------|
| to<br>id<br>Ar<br>thr<br>itis                   | 87<br>3                  |                      | E<br>+<br>0<br>8                 |            |                                                |                                                              | 8<br>4                | 6<br>9                |                                  |                                  |          |   |   |   |          | 0<br>9           |                  |
| Rh<br>eu<br>ma<br>toi<br>d<br>Ar<br>thr<br>itis | C<br>00<br>03<br>87<br>3 | H3<br>P28            | 1.<br>1<br>5<br>E<br>+<br>0<br>8 |            | H3 histone<br>pseudogene 28                    | 11<br>1                                                      | 0<br>.<br>5<br>5<br>3 | 0<br>.<br>6<br>9<br>2 |                                  | 0.<br>04                         |          | 1 | 4 | 0 | 20<br>00 | 2<br>0<br>1<br>8 |                  |
| Rh<br>eu<br>ma<br>toi<br>d<br>Ar<br>thr<br>itis | C<br>00<br>03<br>87<br>3 | LR<br>G1             | 1<br>1<br>6<br>8<br>4<br>4       | P0275<br>0 | leucine rich<br>alpha-2-<br>glycoprotein 1     | 10<br>9                                                      | 0<br>.<br>5<br>6<br>4 | 0<br>.<br>7<br>3<br>1 | 0.<br>0<br>9<br>5<br>1<br>4<br>3 | 0.<br>04                         |          | 1 | 4 | 0 | 20<br>12 | 2<br>0<br>1<br>8 |                  |
| Rh<br>eu<br>ma<br>toi<br>d<br>Ar<br>thr<br>itis | C<br>00<br>03<br>87<br>3 | CL<br>U              | 1<br>1<br>9<br>1                 | P1090<br>9 | clusterin                                      |                                                              | 41<br>2               | 0<br>.<br>4<br>2<br>6 | 0<br>.<br>8<br>8<br>5            | 7.<br>8<br>1<br>E<br>-<br>0<br>5 | 0.<br>04 |   | 1 | 4 | 0        | 20<br>06         | 2<br>0<br>1<br>5 |
| Rh<br>eu<br>ma<br>toi<br>d<br>Ar<br>thr<br>itis | C<br>00<br>03<br>87<br>3 | SE<br>RPI<br>NA<br>3 | 1<br>2                           | P0101<br>1 | serpin<br>family A<br>member<br>3              | En<br>zy<br>me<br>mo<br>dul<br>ato<br>r                      | 22<br>9               | 0<br>.<br>4<br>8<br>6 | 0<br>.<br>8<br>4<br>6            | 8.<br>8<br>3<br>E<br>-<br>1<br>4 | 0.<br>04 |   | 1 | 4 | 0        | 19<br>90         | 2<br>0<br>1<br>9 |
| Rh<br>eu<br>ma<br>toi<br>d<br>Ar<br>thr<br>itis | C<br>00<br>03<br>87<br>3 | CC<br>R4             | 1<br>2<br>3<br>3                 | P5167<br>9 | C-C<br>motif<br>chemoki<br>ne<br>receptor<br>4 | G-<br>pro<br>tei<br>n<br>co<br>upl<br>ed<br>rec<br>ept<br>or | 16<br>8               | 0<br>.<br>5<br>1      | 0<br>.<br>7<br>3<br>1            | 0.<br>0<br>6<br>8<br>6<br>3      | 0.<br>04 |   | 1 | 4 | 0        | 20<br>04         | 2<br>0<br>1<br>9 |
| Rh<br>eu<br>ma<br>toi<br>d<br>Ar                | C<br>00<br>03<br>87<br>3 | CR<br>2              | 1<br>3<br>8<br>0                 | P2002<br>3 | complement<br>C3d receptor 2                   |                                                              | 12<br>3               | 0<br>.<br>5<br>5<br>6 | 0<br>.<br>6<br>5<br>4            | 4.<br>7<br>4<br>E<br>-<br>1<br>9 | 0.<br>04 |   | 1 | 4 | 0        | 20<br>10         | 2<br>0<br>1<br>3 |

|                                                 |                          |                |                  |            |                                                   |                        |          |                       |                            |                                  |          |  |   |   |   |          |                  |
|-------------------------------------------------|--------------------------|----------------|------------------|------------|---------------------------------------------------|------------------------|----------|-----------------------|----------------------------|----------------------------------|----------|--|---|---|---|----------|------------------|
| thr<br>itis                                     |                          |                |                  |            |                                                   |                        |          |                       |                            |                                  |          |  |   |   |   |          |                  |
| Rh<br>eu<br>ma<br>toi<br>d<br>Ar<br>thr<br>itis | C<br>00<br>03<br>87<br>3 | CR<br>AB<br>P2 | 1<br>3<br>8<br>2 | P2937<br>3 | cellular<br>retinoic acid<br>binding<br>protein 2 |                        | 79       | 0<br>.<br>5<br>9<br>3 | 0<br>.<br>6<br>1<br>5<br>1 | 0.<br>0<br>0<br>1<br>5<br>1      | 0.<br>04 |  | 1 | 4 | 0 | 19<br>96 | 2<br>0<br>1<br>8 |
| Rh<br>eu<br>ma<br>toi<br>d<br>Ar<br>thr<br>itis | C<br>00<br>03<br>87<br>3 | CS<br>F1<br>R  | 1<br>4<br>3<br>6 | P0733<br>3 | colony<br>stimulati<br>ng factor<br>1<br>receptor | Ki<br>nas<br>e         | 35<br>6  | 0<br>.<br>4<br>4<br>8 | 0<br>.<br>8<br>0<br>8      | 0.<br>1<br>3<br>2<br>7<br>8      | 0.<br>04 |  | 1 | 4 | 0 | 20<br>16 | 2<br>0<br>1<br>9 |
| Rh<br>eu<br>ma<br>toi<br>d<br>Ar<br>thr<br>itis | C<br>00<br>03<br>87<br>3 | CT<br>NN<br>B1 | 1<br>4<br>9<br>9 | P3522<br>2 | catenin beta 1                                    |                        | 13<br>68 | 0<br>.<br>3<br>0<br>3 | 0<br>.<br>8<br>8<br>5      | 0.<br>9<br>9<br>9<br>9           | 0.<br>04 |  | 1 | 4 | 0 | 20<br>11 | 2<br>0<br>1<br>9 |
| Rh<br>eu<br>ma<br>toi<br>d<br>Ar<br>thr<br>itis | C<br>00<br>03<br>87<br>3 | CY<br>BB       | 1<br>5<br>3<br>6 | P0483<br>9 | cytochro<br>me b-<br>245 beta<br>chain            | Ion<br>ch<br>an<br>nel | 34<br>3  | 0<br>.<br>4<br>5<br>2 | 0<br>.<br>8<br>8<br>5      | 0.<br>9<br>9<br>9<br>0<br>4      | 0.<br>04 |  | 1 | 4 | 0 | 20<br>06 | 2<br>0<br>1<br>9 |
| Rh<br>eu<br>ma<br>toi<br>d<br>Ar<br>thr<br>itis | C<br>00<br>03<br>87<br>3 | DE<br>CR<br>1  | 1<br>6<br>6<br>6 | Q166<br>98 | 2,4-<br>dienoyl-<br>CoA<br>reductas<br>e 1        | En<br>zy<br>me         | 39<br>9  | 0<br>.<br>4<br>2<br>6 | 0<br>.<br>8<br>8<br>5      | 4.<br>4<br>7<br>E<br>-<br>1<br>4 | 0.<br>04 |  | 1 | 4 | 0 | 20<br>06 | 2<br>0<br>1<br>9 |
| Rh<br>eu<br>ma<br>toi<br>d<br>Ar<br>thr<br>itis | C<br>00<br>03<br>87<br>3 | AT<br>N1       | 1<br>8<br>2<br>2 | P5425<br>9 | atrophin 1                                        |                        | 49<br>9  | 0<br>.<br>4<br>0<br>9 | 0<br>.<br>8<br>8<br>5      | 0.<br>9<br>9<br>9<br>2           | 0.<br>04 |  | 1 | 4 | 1 | 20<br>02 | 2<br>0<br>1<br>6 |
| Rh<br>eu<br>ma<br>toi                           | C<br>00<br>03            | S1P<br>R1      | 1<br>9<br>0<br>1 | P2145<br>3 | sphingos<br>ine-1-<br>phospha<br>te               | G-<br>pro<br>tei<br>n  | 12<br>6  | 0<br>.<br>5           | 0<br>.<br>7                | 0.<br>7<br>3<br>2                | 0.<br>04 |  | 1 | 4 | 0 | 20<br>08 | 2<br>0<br>1<br>9 |



|                                                 |                          |               |                  |            |                                                       |                                                              |         |                       |                       |                                  |          |  |              |   |   |          |                  |
|-------------------------------------------------|--------------------------|---------------|------------------|------------|-------------------------------------------------------|--------------------------------------------------------------|---------|-----------------------|-----------------------|----------------------------------|----------|--|--------------|---|---|----------|------------------|
| d<br>Ar<br>thr<br>itis                          | 87<br>3                  |               |                  |            | receptor<br>1                                         | co<br>upl<br>ed<br>rec<br>ept<br>or                          |         | 4<br>6                | 6<br>9                | 6<br>9                           |          |  |              |   |   |          |                  |
| Rh<br>eu<br>ma<br>toi<br>d<br>Ar<br>thr<br>itis | C<br>00<br>03<br>87<br>3 | LP<br>AR<br>1 | 1<br>9<br>0<br>2 | Q926<br>33 | lysophos<br>phatidic<br>acid<br>receptor<br>1         | G-<br>pro<br>tei<br>n<br>co<br>upl<br>ed<br>rec<br>ept<br>or | 14<br>5 | 0<br>.<br>5<br>3<br>4 | 0<br>.<br>8<br>0<br>8 | 0.<br>1<br>8<br>6<br>0<br>3      | 0.<br>04 |  | 1            | 4 | 0 | 20<br>08 | 2<br>0<br>1<br>9 |
| Rh<br>eu<br>ma<br>toi<br>d<br>Ar<br>thr<br>itis | C<br>00<br>03<br>87<br>3 | ED<br>NR<br>A | 1<br>9<br>0<br>9 | P2510<br>1 | endothel<br>in<br>receptor<br>type A                  | G-<br>pro<br>tei<br>n<br>co<br>upl<br>ed<br>rec<br>ept<br>or | 42<br>7 | 0<br>.<br>4<br>2<br>6 | 0<br>.<br>8<br>8<br>5 | 0.<br>9<br>9<br>1<br>5<br>8      | 0.<br>04 |  | 0.<br>7<br>5 | 4 | 0 | 19<br>99 | 2<br>0<br>1<br>4 |
| Rh<br>eu<br>ma<br>toi<br>d<br>Ar<br>thr<br>itis | C<br>00<br>03<br>87<br>3 | EG<br>F       | 1<br>9<br>5<br>0 | P0113<br>3 | epidermal<br>growth factor                            |                                                              | 77<br>4 | 0<br>.<br>3<br>5<br>7 | 0<br>.<br>9<br>2<br>3 | 8.<br>5<br>3<br>E<br>-<br>1<br>7 | 0.<br>04 |  | 1            | 4 | 2 | 20<br>02 | 2<br>0<br>1<br>9 |
| Rh<br>eu<br>ma<br>toi<br>d<br>Ar<br>thr<br>itis | C<br>00<br>03<br>87<br>3 | F3            | 2<br>1<br>5<br>2 | P1372<br>6 | coagulat<br>ion<br>factor<br>III,<br>tissue<br>factor | Re<br>ce<br>pto<br>r                                         | 45<br>6 | 0<br>.<br>4<br>1<br>5 | 0<br>.<br>8<br>4<br>6 | 0.<br>0<br>1<br>8<br>7<br>2      | 0.<br>04 |  | 1            | 4 | 0 | 20<br>03 | 2<br>0<br>1<br>8 |
| Rh<br>eu<br>ma<br>toi<br>d<br>Ar<br>thr<br>itis | C<br>00<br>03<br>87<br>3 | F9            | 2<br>1<br>5<br>8 | P0074<br>0 | coagulat<br>ion<br>factor IX                          | En<br>zy<br>me                                               | 27<br>6 | 0<br>.<br>4<br>6<br>5 | 0<br>.<br>8<br>8<br>5 | 0.<br>9<br>9<br>7<br>7<br>6      | 0.<br>04 |  | 1            | 4 | 1 | 19<br>89 | 2<br>0<br>0<br>9 |
| Rh<br>eu<br>ma<br>toi                           | C<br>00<br>03            | M<br>MR<br>N1 | 2<br>2<br>9      | Q132<br>01 | multimerin 1                                          |                                                              | 27<br>2 | 0<br>.<br>4           | 0<br>.<br>8           | 2.<br>0<br>7<br>E                | 0.<br>04 |  | 1            | 4 | 0 | 19<br>93 | 2<br>0<br>1<br>9 |

|                                                 |                          |                 |                       |                           |                                    |                                                              |         |                       |                       |                                  |          |  |              |   |   |          |                  |
|-------------------------------------------------|--------------------------|-----------------|-----------------------|---------------------------|------------------------------------|--------------------------------------------------------------|---------|-----------------------|-----------------------|----------------------------------|----------|--|--------------|---|---|----------|------------------|
| d<br>Ar<br>thr<br>itis                          | 87<br>3                  |                 | 1<br>5                |                           |                                    |                                                              |         | 6<br>5                | 4<br>6                | -<br>2<br>5                      |          |  |              |   |   |          |                  |
| Rh<br>eu<br>ma<br>toi<br>d<br>Ar<br>thr<br>itis | C<br>00<br>03<br>87<br>3 | FO<br>XC<br>1   | 2<br>2<br>9<br>6      | Q129<br>48                | forkhead<br>box C1                 | Tr<br>ans<br>cri<br>pti<br>on<br>fac<br>tor                  | 24<br>2 | 0<br>.<br>4<br>8<br>3 | 0<br>.<br>8<br>4<br>6 | 0.<br>9<br>5<br>3<br>7           | 0.<br>04 |  | 1            | 4 | 0 | 19<br>88 | 2<br>0<br>1<br>8 |
| Rh<br>eu<br>ma<br>toi<br>d<br>Ar<br>thr<br>itis | C<br>00<br>03<br>87<br>3 | FL<br>NB        | 2<br>3<br>1<br>7      | O753<br>69                | filamin<br>B                       |                                                              | 37<br>4 | 0<br>.<br>4<br>5<br>8 | 0<br>.<br>9<br>2<br>3 | 6.<br>0<br>5<br>E<br>-<br>1<br>0 | 0.<br>04 |  | 1            | 4 | 0 | 19<br>94 | 2<br>0<br>0<br>0 |
| Rh<br>eu<br>ma<br>toi<br>d<br>Ar<br>thr<br>itis | C<br>00<br>03<br>87<br>3 | SE<br>C1<br>4L2 | 2<br>3<br>5<br>4<br>1 | O760<br>54                | SEC14 like<br>lipid binding 2      |                                                              | 19<br>8 | 0<br>.<br>4<br>9<br>4 | 0<br>.<br>8<br>8<br>5 | 2.<br>9<br>2<br>E<br>-<br>0<br>8 | 0.<br>04 |  | 1            | 4 | 0 | 19<br>94 | 2<br>0<br>0<br>0 |
| Rh<br>eu<br>ma<br>toi<br>d<br>Ar<br>thr<br>itis | C<br>00<br>03<br>87<br>3 | FP<br>R2        | 2<br>3<br>5<br>8      | P2509<br>0                | formyl<br>peptide<br>receptor<br>2 | G-<br>pro<br>tei<br>n<br>co<br>upl<br>ed<br>rec<br>ept<br>or | 12<br>4 | 0<br>.<br>5<br>4<br>7 | 0<br>.<br>7<br>6<br>9 | 0.<br>4<br>0<br>1<br>3<br>7      | 0.<br>04 |  | 1            | 4 | 0 | 20<br>04 | 2<br>0<br>1<br>8 |
| Rh<br>eu<br>ma<br>toi<br>d<br>Ar<br>thr<br>itis | C<br>00<br>03<br>87<br>3 | BB<br>C3        | 2<br>7<br>1<br>1<br>3 | Q96P<br>G8;Q<br>9BXH<br>1 | BCL2 binding<br>component 3        |                                                              | 15<br>7 | 0<br>.<br>5<br>1<br>7 | 0<br>.<br>7<br>6<br>9 | 0.<br>0<br>0<br>3<br>9<br>7<br>6 | 0.<br>04 |  | 0.<br>7<br>5 | 4 | 0 | 20<br>06 | 2<br>0<br>1<br>7 |
| Rh<br>eu<br>ma<br>toi<br>d<br>Ar<br>thr<br>itis | C<br>00<br>03<br>87<br>3 | GL<br>B1        | 2<br>7<br>2<br>0      | P1627<br>8                | galactosi<br>dase<br>beta 1        | En<br>zy<br>me                                               | 38<br>5 | 0<br>.<br>4<br>4<br>8 | 0<br>.<br>8<br>0<br>8 | 7.<br>9<br>2<br>E<br>-<br>1<br>0 | 0.<br>04 |  | 1            | 4 | 0 | 19<br>96 | 2<br>0<br>1<br>9 |

|                      |          |              |       |            |                                                     |        |        |        |        |          |      |       |      |      |      |
|----------------------|----------|--------------|-------|------------|-----------------------------------------------------|--------|--------|--------|--------|----------|------|-------|------|------|------|
| Rheumatoid Arthritis | C0003873 | IGHV3O R16-7 | 28309 |            | immunoglobulin heavy variable 3/OR16-7 (pseudogene) | 98     | 0566   | 064    |        | 0.04     |      | 140   | 1995 | 2007 |      |
| Rheumatoid Arthritis | C0003873 | IGHV3-52     | 28421 |            | immunoglobulin heavy variable 3-52 (pseudogene)     | 37     | 067443 | 0643   |        | 0.04     |      | 140   | 1993 | 2010 |      |
| Rheumatoid Arthritis | C0003873 | TRBV16       | 28571 | A0A087WV62 | T cell receptor beta variable 16 (gene/pseudogene)  | 29     | 0695   | 065    |        | 0.04     |      | 0.754 | 1994 | 1997 |      |
| Rheumatoid Arthritis | C0003873 | TRBV7-9      | 28889 | P04435     | T cell receptor beta variable 7-9                   | 29     | 0695   | 065    |        | 0.04     |      | 0.754 | 1994 | 1997 |      |
| Rheumatoid Arthritis | C0003873 | TRBC1        | 28639 | P01850     | T cell receptor beta constant 1                     | 29     | 0695   | 065    |        | 0.04     |      | 0.754 | 1994 | 1997 |      |
| Rheumatoid Arthritis | C0003873 | GP T         | 2875  | P24298     | glutamic -- pyruvic transaminase                    | Enzyme | 511    | 044033 | 0493   | 3.59E-19 | 0.04 |       | 140  | 2001 | 2019 |
| Rheumatoid Ar        | C0003873 | GRN          | 2896  | P28799     | granulin precursor                                  |        | 412    | 04435  | 048466 | 0.0096   | 0.04 |       | 0.75 | 2015 | 2020 |

|                                                 |                          |                      |                       |            |                                                                            |                                    |                       |                       |                                  |          |  |              |   |   |          |                  |
|-------------------------------------------------|--------------------------|----------------------|-----------------------|------------|----------------------------------------------------------------------------|------------------------------------|-----------------------|-----------------------|----------------------------------|----------|--|--------------|---|---|----------|------------------|
| thr<br>itis                                     |                          |                      |                       |            |                                                                            |                                    |                       |                       | 6<br>6                           |          |  |              |   |   |          |                  |
| Rh<br>eu<br>ma<br>toi<br>d<br>Ar<br>thr<br>itis | C<br>00<br>03<br>87<br>3 | RM<br>C1             | 2<br>9<br>9<br>1<br>9 | Q96D<br>M3 | regulator of<br>MON1-CCZ1                                                  | 11<br>0                            | 0<br>.<br>5<br>5<br>5 | 0<br>.<br>7<br>3<br>1 | 0.<br>9<br>8<br>8<br>2<br>3      | 0.<br>04 |  | 1            | 4 | 0 | 20<br>07 | 2<br>0<br>1<br>9 |
| Rh<br>eu<br>ma<br>toi<br>d<br>Ar<br>thr<br>itis | C<br>00<br>03<br>87<br>3 | IL1<br>9             | 2<br>9<br>9<br>4<br>9 | Q9U<br>HD0 | interleukin 19                                                             | 10<br>3                            | 0<br>.<br>5<br>5<br>8 | 0<br>.<br>7<br>6<br>9 | 4.<br>3<br>3<br>E<br>-<br>0<br>5 | 0.<br>04 |  | 1            | 4 | 5 | 20<br>10 | 2<br>0<br>1<br>8 |
| Rh<br>eu<br>ma<br>toi<br>d<br>Ar<br>thr<br>itis | C<br>00<br>03<br>87<br>3 | AN<br>XA<br>1        | 3<br>0<br>1           | P0408<br>3 | annexin A1                                                                 | 33<br>6                            | 0<br>.<br>4<br>4<br>2 | 0<br>.<br>8<br>8<br>5 | 1.<br>2<br>E<br>-<br>0<br>7      | 0.<br>04 |  | 1            | 4 | 0 | 20<br>07 | 2<br>0<br>1<br>9 |
| Rh<br>eu<br>ma<br>toi<br>d<br>Ar<br>thr<br>itis | C<br>00<br>03<br>87<br>3 | AC<br>AC<br>A        | 3<br>1                | Q130<br>85 | acetyl-CoA<br>carboxylase<br>alpha                                         | 24<br>1                            | 0<br>.<br>4<br>8      | 0<br>.<br>8<br>4<br>6 | 1                                | 0.<br>04 |  | 0.<br>7<br>5 | 4 | 0 | 20<br>08 | 2<br>0<br>1<br>9 |
| Rh<br>eu<br>ma<br>toi<br>d<br>Ar<br>thr<br>itis | C<br>00<br>03<br>87<br>3 | HL<br>A-<br>DR<br>B3 | 3<br>1<br>2<br>5      | P7948<br>3 | major histoco<br>mpatibil<br>ity<br>complex<br>, class II,<br>DR beta<br>3 | Im<br>mu<br>ne<br>res<br>po<br>nse | 85                    | 0<br>.<br>5<br>7      | 0<br>.<br>8<br>8<br>5            | 0.<br>04 |  | 0.<br>5      | 4 | 0 | 19<br>92 | 2<br>0<br>1<br>9 |
| Rh<br>eu<br>ma<br>toi<br>d<br>Ar<br>thr<br>itis | C<br>00<br>03<br>87<br>3 | HO<br>XD<br>9        | 3<br>2<br>3<br>5      | P2835<br>6 | homeobox D9                                                                | 34                                 | 0<br>.<br>6<br>7      | 0<br>.<br>4<br>6<br>2 | 0.<br>0<br>1<br>7<br>0<br>0<br>4 | 0.<br>04 |  | 1            | 4 | 0 | 19<br>96 | 2<br>0<br>0<br>2 |
| Rh<br>eu<br>ma<br>toi                           | C<br>00<br>03            | AP<br>C              | 3<br>2<br>4           | P2505<br>4 | APC regulator<br>of WNT<br>signaling<br>pathway                            | 70<br>3                            | 0<br>.<br>3           | 0<br>.<br>9           | 1                                | 0.<br>04 |  | 1            | 4 | 0 | 19<br>99 | 2<br>0<br>1<br>1 |

|                      |          |        |        |        |                                              |                            |     |       |       |          |      |  |      |   |   |      |      |
|----------------------|----------|--------|--------|--------|----------------------------------------------|----------------------------|-----|-------|-------|----------|------|--|------|---|---|------|------|
| d Arthritis          | 873      |        |        |        |                                              |                            | 73  | 62    |       |          |      |  |      |   |   |      |      |
| Rheumatoid Arthritis | C0003873 | HTR2A  | 3356   | P28223 | 5-hydroxytryptamine receptor 2A              | G-protein coupled receptor | 289 | 0.473 | 0.846 | 0.5124   | 0.04 |  | 1    | 4 | 3 | 2006 | 2013 |
| Rheumatoid Arthritis | C0003873 | ARMH1  | 339541 | Q6PIY5 | armadillo like helical domain containing 1   |                            | 111 | 0.553 | 0.692 | 1.65E-05 | 0.04 |  | 1    | 4 | 0 | 2000 | 2018 |
| Rheumatoid Arthritis | C0003873 | IFNB1  | 3456   | P01574 | interferon beta 1                            |                            | 426 | 0.421 | 0.846 |          | 0.04 |  | 1    | 4 | 0 | 2012 | 2018 |
| Rheumatoid Arthritis | C0003873 | IGFBP5 | 3488   | P24593 | insulin like growth factor binding protein 5 | Enzyme modulator           | 126 | 0.544 | 0.692 | 0.9283   | 0.04 |  | 1    | 4 | 0 | 2002 | 2018 |
| Rheumatoid Arthritis | C0003873 | LCB3   | 353143 | Q5TA77 | late cornified envelope 3B                   |                            | 14  | 0.751 | 0.231 | 0.0032   | 0.04 |  | 0.75 | 4 | 0 | 2010 | 2012 |
| Rheumatoid Arthritis | C0003873 | LCB3   | 353144 | Q5T5A8 | late cornified envelope 3C                   |                            | 15  | 0.743 | 0.269 | 0.4753   | 0.04 |  | 0.75 | 4 | 0 | 2010 | 2012 |

|                      |          |         |      |        |                                                                                      |                            |     |       |        |          |      |  |      |   |   |      |      |
|----------------------|----------|---------|------|--------|--------------------------------------------------------------------------------------|----------------------------|-----|-------|--------|----------|------|--|------|---|---|------|------|
| Rheumatoid Arthritis | C0003873 | IKKB    | 3551 | O14920 | inhibitor of nuclear factor kappa B kinase subunit beta                              | Kinase                     | 191 | 0.506 | 0.846  | 0.9192   | 0.04 |  | 1    | 4 | 0 | 2001 | 2020 |
| Rheumatoid Arthritis | C0003873 | IL5     | 3567 | P05113 | interleukin 5                                                                        |                            | 359 | 0.437 | 0.846  | 0.0563   | 0.04 |  | 0.75 | 4 | 0 | 1996 | 2019 |
| Rheumatoid Arthritis | C0003873 | CXCR2   | 3579 | P25025 | C-X-C motif chemokine receptor 2                                                     | G-protein coupled receptor | 335 | 0.45  | 0.9336 | 0.01336  | 0.04 |  | 1    | 4 | 0 | 1997 | 2015 |
| Rheumatoid Arthritis | C0003873 | IL10RA  | 3587 | Q13651 | interleukin 10 receptor subunit alpha                                                | Receptor                   | 90  | 0.579 | 0.692  | 0.01788  | 0.04 |  | 1    | 4 | 3 | 1999 | 2017 |
| Rheumatoid Arthritis | C0003873 | ITGA1   | 3672 | P56199 | integrin subunit alpha 1                                                             |                            | 58  | 0.644 | 0.654  | 2.61E-16 | 0.04 |  | 1    | 4 | 0 | 1988 | 2019 |
| Rheumatoid Arthritis | C0003873 | KIR2DL2 | 3803 | P43627 | killer cell immunoglobulin like receptor, two Ig domains and long cytoplasmic tail 2 | Receptor                   | 65  | 0.612 | 0.654  |          | 0.04 |  | 1    | 4 | 0 | 2012 | 2019 |

|                      |          |           |        |        |                                            |     |       |       |          |      |  |      |   |   |      |      |
|----------------------|----------|-----------|--------|--------|--------------------------------------------|-----|-------|-------|----------|------|--|------|---|---|------|------|
| Rheumatoid Arthritis | C0003873 | KLRC1     | 3821   | P26715 | killer cell lectin like receptor C1        | 67  | 0.604 | 0.731 | 4.14E-05 | 0.04 |  | 1    | 4 | 1 | 2003 | 2017 |
| Rheumatoid Arthritis | C0003873 | SUMO4     | 387082 | Q6EEV6 | small ubiquitin like modifier 4            | 39  | 0.653 | 0.577 |          | 0.04 |  | 0.75 | 4 | 1 | 2005 | 2006 |
| Rheumatoid Arthritis | C0003873 | LOC390714 | 390714 |        | immunoglobulin heavy chain variable region | 55  | 0.617 | 0.615 |          | 0.04 |  | 1    | 4 | 0 | 1995 | 2007 |
| Rheumatoid Arthritis | C0003873 | LBIP      | 3929   | P18428 | lipopolysaccharide binding protein         | 156 | 0.525 | 0.808 | 4.19E-15 | 0.04 |  | 1    | 4 | 0 | 2018 | 2019 |
| Rheumatoid Arthritis | C0003873 | LOX       | 4015   | P28300 | lysyl oxidase                              | 328 | 0.447 | 0.846 | 0.9769   | 0.04 |  | 1    | 4 | 0 | 1995 | 2018 |
| Rheumatoid Arthritis | C0003873 | MI R10A   | 406902 |        | microRNA 10a                               | 158 | 0.513 | 0.846 |          | 0.04 |  | 1    | 4 | 0 | 2016 | 2018 |
| Rheumatoid Ar        | C0003873 | MI R145   | 406937 |        | microRNA 145                               | 366 | 0.431 | 0.846 |          | 0.04 |  | 1    | 4 | 0 | 2017 | 2019 |

|                                                 |                          |                     |                       |            |                                                                       |                              |         |                       |                       |                                  |          |  |              |   |   |          |                  |
|-------------------------------------------------|--------------------------|---------------------|-----------------------|------------|-----------------------------------------------------------------------|------------------------------|---------|-----------------------|-----------------------|----------------------------------|----------|--|--------------|---|---|----------|------------------|
| thr<br>itis                                     |                          |                     |                       |            |                                                                       |                              |         |                       |                       |                                  |          |  |              |   |   |          |                  |
| Rh<br>eu<br>ma<br>toi<br>d<br>Ar<br>thr<br>itis | C<br>00<br>03<br>87<br>3 | CD<br>46            | 4<br>1<br>7<br>9      | P1552<br>9 | CD46<br>molecule                                                      |                              | 25<br>8 | 0<br>.<br>4<br>7<br>7 | 0<br>.<br>8<br>0<br>8 | 4.<br>7<br>E<br>-<br>0<br>7      | 0.<br>04 |  | 1            | 4 | 0 | 20<br>17 | 2<br>0<br>1<br>9 |
| Rh<br>eu<br>ma<br>toi<br>d<br>Ar<br>thr<br>itis | C<br>00<br>03<br>87<br>3 | MI<br>P             | 4<br>2<br>8<br>4      | P3030<br>1 | major<br>intrinsic<br>protein<br>of lens<br>fiber                     | Ion<br>ch<br>an<br>nel       | 18<br>1 | 0<br>.<br>5<br>0<br>7 | 0<br>.<br>8<br>4<br>6 | 0.<br>0<br>3<br>0<br>9<br>5<br>6 | 0.<br>04 |  | 1            | 4 | 0 | 19<br>99 | 2<br>0<br>0<br>3 |
| Rh<br>eu<br>ma<br>toi<br>d<br>Ar<br>thr<br>itis | C<br>00<br>03<br>87<br>3 | M<br>MP<br>19       | 4<br>3<br>2<br>7      | Q995<br>42 | matrix<br>metallop<br>eptidase<br>19                                  | En<br>zy<br>me               | 64      | 0<br>.<br>6<br>2<br>3 | 0<br>.<br>6<br>1<br>5 | 2<br>E<br>-<br>2<br>0            | 0.<br>04 |  | 1            | 4 | 0 | 19<br>97 | 2<br>0<br>0<br>4 |
| Rh<br>eu<br>ma<br>toi<br>d<br>Ar<br>thr<br>itis | C<br>00<br>03<br>87<br>3 | PA<br>EP            | 5<br>0<br>4<br>7      | P0946<br>6 | progesta<br>gen<br>associat<br>ed<br>endomet<br>rial<br>protein       | En<br>zy<br>me               | 39<br>7 | 0<br>.<br>4<br>3      | 0<br>.<br>8<br>4<br>6 | 3.<br>1<br>1<br>E<br>-<br>0<br>8 | 0.<br>04 |  | 1            | 4 | 0 | 20<br>03 | 2<br>0<br>1<br>7 |
| Rh<br>eu<br>ma<br>toi<br>d<br>Ar<br>thr<br>itis | C<br>00<br>03<br>87<br>3 | AN<br>GP<br>TL<br>4 | 5<br>1<br>1<br>2<br>9 | Q9BY<br>76 | angiopoi<br>etin like<br>4                                            | Sig<br>nal<br>ing            | 19<br>8 | 0<br>.<br>4<br>9<br>8 | 0<br>.<br>7<br>3<br>1 | 2.<br>3<br>1<br>E<br>-<br>1<br>1 | 0.<br>04 |  | 1            | 4 | 0 | 20<br>14 | 2<br>0<br>1<br>7 |
| Rh<br>eu<br>ma<br>toi<br>d<br>Ar<br>thr<br>itis | C<br>00<br>03<br>87<br>3 | PE<br>CA<br>M1      | 5<br>1<br>7<br>5      | P1628<br>4 | platelet<br>and<br>endothel<br>ial cell<br>adhesion<br>molecul<br>e 1 | Ce<br>ll<br>ad<br>hes<br>ion | 39<br>6 | 0<br>.<br>4<br>2<br>6 | 0<br>.<br>8<br>4<br>6 |                                  | 0.<br>04 |  | 0.<br>7<br>5 | 4 | 3 | 20<br>04 | 2<br>0<br>1<br>4 |
| Rh<br>eu<br>ma<br>toi                           | C<br>00<br>03            | PG<br>F             | 5<br>2<br>2<br>8      | P4976<br>3 | placenta<br>l growth<br>factor                                        | Sig<br>nal<br>ing            | 28<br>8 | 0<br>.<br>4<br>6      | 0<br>.<br>8           | 0.<br>1<br>2                     | 0.<br>04 |  | 1            | 4 | 0 | 20<br>09 | 2<br>0<br>1<br>5 |



|                                                 |                          |                     |                            |            |                                                       |                                         |         |                       |                            |                                  |          |  |   |   |   |          |                  |
|-------------------------------------------------|--------------------------|---------------------|----------------------------|------------|-------------------------------------------------------|-----------------------------------------|---------|-----------------------|----------------------------|----------------------------------|----------|--|---|---|---|----------|------------------|
| d<br>Ar<br>thr<br>itis                          | 87<br>3                  |                     |                            |            |                                                       |                                         |         |                       | 4<br>6                     | 8<br>8                           |          |  |   |   |   |          |                  |
| Rh<br>eu<br>ma<br>toi<br>d<br>Ar<br>thr<br>itis | C<br>00<br>03<br>87<br>3 | PR<br>KC<br>A       | 5<br>5<br>7<br>8           | P1725<br>2 | protein<br>kinase C<br>alpha                          | Ki<br>nas<br>e                          | 36<br>8 | 0<br>.<br>4<br>4<br>6 | 0<br>.<br>8<br>4<br>7<br>6 | 0.<br>3<br>6<br>7<br>7           | 0.<br>04 |  | 1 | 4 | 0 | 20<br>06 | 2<br>0<br>2<br>0 |
| Rh<br>eu<br>ma<br>toi<br>d<br>Ar<br>thr<br>itis | C<br>00<br>03<br>87<br>3 | IL2<br>6            | 5<br>5<br>8<br>0<br>1      | Q9NP<br>H9 | interleukin 26                                        |                                         | 51      | 0<br>.<br>6<br>3<br>1 | 0<br>.<br>5<br>3<br>8      | 0.<br>0<br>0<br>0<br>5<br>3<br>5 | 0.<br>04 |  | 1 | 4 | 0 | 20<br>03 | 2<br>0<br>2<br>0 |
| Rh<br>eu<br>ma<br>toi<br>d<br>Ar<br>thr<br>itis | C<br>00<br>03<br>87<br>3 | PS<br>MD<br>7       | 5<br>7<br>1<br>3           | P5166<br>5 | proteaso<br>me 26S<br>subunit,<br>non-<br>ATPase<br>7 | En<br>zy<br>me                          | 11<br>4 | 0<br>.<br>5<br>5<br>1 | 0<br>.<br>6<br>9<br>2      | 0.<br>2<br>6<br>3<br>6<br>7      | 0.<br>04 |  | 1 | 4 | 0 | 20<br>00 | 2<br>0<br>1<br>8 |
| Rh<br>eu<br>ma<br>toi<br>d<br>Ar<br>thr<br>itis | C<br>00<br>03<br>87<br>3 | MI<br>R4<br>51<br>A | 5<br>7<br>4<br>4<br>1<br>1 |            | microRNA<br>451a                                      |                                         | 17<br>7 | 0<br>.<br>5<br>0<br>5 | 0<br>.<br>7<br>6<br>9      |                                  | 0.<br>04 |  | 1 | 4 | 0 | 20<br>14 | 2<br>0<br>1<br>8 |
| Rh<br>eu<br>ma<br>toi<br>d<br>Ar<br>thr<br>itis | C<br>00<br>03<br>87<br>3 | CC<br>ND<br>1       | 5<br>9<br>5                | P2438<br>5 | cyclin<br>D1                                          | En<br>zy<br>me<br>mo<br>dul<br>ato<br>r | 85<br>9 | 0<br>.<br>3<br>4<br>4 | 0<br>.<br>9<br>2<br>3      | 0.<br>8<br>9<br>0<br>5<br>7      | 0.<br>04 |  | 1 | 4 | 0 | 20<br>01 | 2<br>0<br>1<br>7 |
| Rh<br>eu<br>ma<br>toi<br>d<br>Ar<br>thr<br>itis | C<br>00<br>03<br>87<br>3 | RE<br>G1<br>A       | 5<br>9<br>6<br>7           | P0545<br>1 | regenerating<br>family<br>member<br>alpha             |                                         | 26<br>4 | 0<br>.<br>4<br>6<br>7 | 0<br>.<br>8<br>4<br>6      | 1.<br>3<br>5<br>E<br>-<br>0<br>5 | 0.<br>04 |  | 1 | 4 | 0 | 19<br>89 | 2<br>0<br>0<br>9 |

|                      |          |         |      |        |                                     |                         |     |       |         |          |      |  |      |   |   |      |      |
|----------------------|----------|---------|------|--------|-------------------------------------|-------------------------|-----|-------|---------|----------|------|--|------|---|---|------|------|
| Rheumatoid Arthritis | C0003873 | REN     | 5972 | P00797 | renin                               | Enzyme                  | 721 | 0.37  | 0.923   | 2.43E-07 | 0.04 |  | 1    | 4 | 0 | 2017 | 2020 |
| Rheumatoid Arthritis | C0003873 | S100A1  | 6271 | P23297 | S100 calcium binding protein A1     | Calcium-binding protein | 396 | 0.421 | 0.846   | 0.004    | 0.04 |  | 1    | 4 | 0 | 2002 | 2019 |
| Rheumatoid Arthritis | C0003873 | S100B   | 6285 | P04271 | S100 calcium binding protein B      | Calcium-binding protein | 599 | 0.383 | 0.92387 | 0.04     | 0.04 |  | 1    | 4 | 0 | 2002 | 2019 |
| Rheumatoid Arthritis | C0003873 | CCLL3L1 | 6349 | P16619 | C-C motif chemokine ligand 3 like 1 |                         | 40  | 0.65  | 0.654   | 0.01257  | 0.04 |  | 0.75 | 4 | 0 | 2008 | 2016 |
| Rheumatoid Arthritis | C0003873 | CXCL5   | 6374 | P42830 | C-X-C motif chemokine ligand 5      | Signaling               | 160 | 0.519 | 0.769   | 5.04E-06 | 0.04 |  | 1    | 4 | 0 | 1997 | 2019 |
| Rheumatoid Arthritis | C0003873 | SELL    | 6402 | P14151 | selectin L                          |                         | 171 | 0.505 | 0.846   | 4.96E-07 | 0.04 |  | 1    | 4 | 0 | 2006 | 2015 |

|                      |          |        |      |        |                                           |                    |     |       |       |          |      |  |      |   |   |      |      |
|----------------------|----------|--------|------|--------|-------------------------------------------|--------------------|-----|-------|-------|----------|------|--|------|---|---|------|------|
| Rheumatoid Arthritis | C0003873 | SELP   | 6403 | P16109 | selectin P                                |                    | 293 | 0.46  | 0.79  | 5.04E-32 | 0.04 |  | 0.75 | 4 | 1 | 2007 | 2018 |
| Rheumatoid Arthritis | C0003873 | MAP2K4 | 6416 | P45985 | mitogen-activated protein kinase kinase 4 | Kinase             | 100 | 0.599 | 0.697 | 0.9709   | 0.04 |  | 1    | 4 | 0 | 2003 | 2015 |
| Rheumatoid Arthritis | C0003873 | SFRP1  | 6422 | Q8N474 | secreted frizzled related protein 1       |                    | 227 | 0.479 | 0.846 | 0.9657   | 0.04 |  | 0.75 | 4 | 0 | 1998 | 2011 |
| Rheumatoid Arthritis | C0003873 | SHBG   | 6462 | P04278 | sex hormone binding globulin              |                    | 368 | 0.438 | 0.808 | 1.25E-06 | 0.04 |  | 1    | 4 | 0 | 1992 | 2019 |
| Rheumatoid Arthritis | C0003873 | SLC2A5 | 6584 | O76082 | solute carrier family 22 member 5         | Transporter        | 103 | 0.608 | 0.731 | 5.27E-16 | 0.04 |  | 1    | 4 | 0 | 2005 | 2013 |
| Rheumatoid Arthritis | C0003873 | FSCN1  | 6624 | Q16658 | fascin actin-bundling protein 1           | Cellular structure | 175 | 0.544 | 0.731 | 0.8652   | 0.04 |  | 0.75 | 4 | 0 | 1992 | 2003 |
| Rheumatoid Ar        | C0003873 | SOX5   | 6660 | P35711 | SRF-box transcription factor 5            |                    | 150 | 0.545 | 0.799 | 0.995    | 0.04 |  | 1    | 4 | 0 | 2016 | 2018 |

|                                                 |                          |               |                  |            |                                                                               |                                                              |         |                       |                       |                                  |          |  |   |   |   |          |                  |
|-------------------------------------------------|--------------------------|---------------|------------------|------------|-------------------------------------------------------------------------------|--------------------------------------------------------------|---------|-----------------------|-----------------------|----------------------------------|----------|--|---|---|---|----------|------------------|
| thr<br>itis                                     |                          |               |                  |            |                                                                               |                                                              |         |                       |                       |                                  |          |  |   |   |   |          |                  |
| Rh<br>eu<br>ma<br>toi<br>d<br>Ar<br>thr<br>itis | C<br>00<br>03<br>87<br>3 | TA<br>P1      | 6<br>8<br>9<br>0 | Q035<br>18 | transport<br>er 1,<br>ATP<br>binding<br>cassette<br>subfamil<br>y B<br>member | Tr<br>ans<br>por<br>ter                                      | 18<br>1 | 0<br>.<br>5           | 0<br>.<br>8<br>0<br>8 | 5.<br>3<br>4<br>E<br>-<br>0<br>6 | 0.<br>04 |  | 1 | 4 | 2 | 19<br>97 | 2<br>0<br>0<br>4 |
| Rh<br>eu<br>ma<br>toi<br>d<br>Ar<br>thr<br>itis | C<br>00<br>03<br>87<br>3 | TB<br>X5      | 6<br>9<br>1<br>0 | Q995<br>93 | T-box<br>transcrip<br>tion<br>factor 5                                        | Tr<br>ans<br>cri<br>pti<br>on<br>fac<br>tor                  | 17<br>0 | 0<br>.<br>5<br>2<br>8 | 0<br>.<br>7<br>6<br>9 | 0.<br>9<br>9<br>5<br>4           | 0.<br>04 |  | 1 | 4 | 0 | 20<br>14 | 2<br>0<br>1<br>8 |
| Rh<br>eu<br>ma<br>toi<br>d<br>Ar<br>thr<br>itis | C<br>00<br>03<br>87<br>3 | TP<br>MT      | 7<br>1<br>7<br>2 | P5158<br>0 | thiopurine S-<br>methyltransfer<br>ase                                        |                                                              | 83      | 0<br>.<br>5<br>9<br>3 | 0<br>.<br>6<br>9<br>2 | 7.<br>1<br>1<br>E<br>-<br>0<br>6 | 0.<br>04 |  | 1 | 4 | 0 | 20<br>03 | 2<br>0<br>1<br>8 |
| Rh<br>eu<br>ma<br>toi<br>d<br>Ar<br>thr<br>itis | C<br>00<br>03<br>87<br>3 | C5<br>AR<br>1 | 7<br>2<br>8      | P2173<br>0 | comple<br>ment<br>C5a<br>receptor<br>1                                        | G-<br>pro<br>tei<br>n<br>co<br>upl<br>ed<br>rec<br>ept<br>or | 17<br>9 | 0<br>.<br>5<br>1<br>3 | 0<br>.<br>8<br>0<br>8 | 0.<br>4<br>0<br>2<br>4<br>9      | 0.<br>04 |  | 1 | 4 | 0 | 20<br>02 | 2<br>0<br>1<br>8 |
| Rh<br>eu<br>ma<br>toi<br>d<br>Ar<br>thr<br>itis | C<br>00<br>03<br>87<br>3 | TX<br>N       | 7<br>2<br>9<br>5 | P1059<br>9 | thioredoxin                                                                   |                                                              | 33<br>8 | 0<br>.<br>4<br>4<br>7 | 0<br>.<br>8<br>8<br>5 | 0.<br>2<br>0<br>1<br>1<br>9      | 0.<br>04 |  | 1 | 4 | 0 | 20<br>06 | 2<br>0<br>1<br>8 |
| Rh<br>eu<br>ma<br>toi<br>d<br>Ar<br>thr<br>itis | C<br>00<br>03<br>87<br>3 | V<br>WF       | 7<br>4<br>5<br>0 | P0427<br>5 | von<br>Willebra<br>nd factor                                                  | En<br>zy<br>me<br>mo<br>dul<br>ato<br>r                      | 49<br>8 | 0<br>.<br>4<br>0<br>8 | 0<br>.<br>8<br>8<br>5 | 3.<br>2<br>2<br>E<br>-<br>2<br>5 | 0.<br>04 |  | 1 | 4 | 0 | 19<br>84 | 2<br>0<br>1<br>9 |

|                      |          |         |       |        |                                                |                      |     |       |       |          |      |  |   |   |   |      |      |
|----------------------|----------|---------|-------|--------|------------------------------------------------|----------------------|-----|-------|-------|----------|------|--|---|---|---|------|------|
| Rheumatoid Arthritis | C0003873 | STEA P4 | 79689 | Q687X5 | STEAP4 metalloredutase                         |                      | 34  | 0.686 | 0.462 | 1.2E-07  | 0.04 |  | 1 | 4 | 0 | 2009 | 2018 |
| Rheumatoid Arthritis | C0003873 | EHMT1   | 79813 | Q9H9B1 | euchromatic histone lysine methyltransferase 1 | Epigenetic regulator | 371 | 0.466 | 0.808 | 1        | 0.04 |  | 1 | 4 | 0 | 2017 | 2018 |
| Rheumatoid Arthritis | C0003873 | CD276   | 80381 | Q5ZPR3 | CD276 molecule                                 | Enzyme modulator     | 169 | 0.505 | 0.731 | 2.47E-09 | 0.04 |  | 1 | 4 | 0 | 2008 | 2019 |
| Rheumatoid Arthritis | C0003873 | IL1F10  | 84639 | Q8WZ1  | interleukin family member 10                   | 1                    | 57  | 0.636 | 0.462 | 2.0E-06  | 0.04 |  | 1 | 4 | 0 | 2010 | 2019 |
| Rheumatoid Arthritis | C0003873 | USO1    | 8615  | O60763 | USO1 vesicle transport factor                  | Transporter          | 153 | 0.522 | 0.851 | 0.33417  | 0.04 |  | 1 | 4 | 0 | 1994 | 2000 |
| Rheumatoid Arthritis | C0003873 | TP63    | 8626  | Q9H3D4 | tumor protein p63                              | Transcription factor | 816 | 0.362 | 0.769 | 0.9928   | 0.04 |  | 1 | 4 | 0 | 2000 | 2018 |
| Rheumatoid Ar        | C0003873 | CD1C    | 911   | P29017 | CD1c molecule                                  |                      | 49  | 0.633 | 0.692 | 1.6E-08  | 0.04 |  | 1 | 4 | 0 | 2017 | 2019 |

|                                                 |                          |                     |                       |            |                                                                  |         |                       |                       |                                  |          |  |              |   |   |          |                  |
|-------------------------------------------------|--------------------------|---------------------|-----------------------|------------|------------------------------------------------------------------|---------|-----------------------|-----------------------|----------------------------------|----------|--|--------------|---|---|----------|------------------|
| thr<br>itis                                     |                          |                     |                       |            |                                                                  |         |                       |                       |                                  |          |  |              |   |   |          |                  |
| Rh<br>eu<br>ma<br>toi<br>d<br>Ar<br>thr<br>itis | C<br>00<br>03<br>87<br>3 | AR<br>HG<br>EF<br>2 | 9<br>1<br>8<br>1      | Q929<br>74 | Rho/Rac<br>guanine<br>nucleotide<br>exchange<br>factor 2         | 20<br>5 | 0<br>.<br>5<br>0<br>2 | 0<br>.<br>7<br>6<br>9 | 1                                | 0.<br>04 |  | 1            | 4 | 0 | 20<br>00 | 2<br>0<br>1<br>8 |
| Rh<br>eu<br>ma<br>toi<br>d<br>Ar<br>thr<br>itis | C<br>00<br>03<br>87<br>3 | TI<br>MD<br>4       | 9<br>1<br>9<br>3<br>7 | Q96H<br>15 | T cell<br>immunoglobul<br>in and mucin<br>domain<br>containing 4 | 49      | 0<br>.<br>6<br>4<br>4 | 0<br>.<br>6<br>5<br>4 | 2.<br>6<br>4<br>E<br>-<br>1<br>0 | 0.<br>04 |  | 0.<br>7<br>5 | 4 | 1 | 20<br>12 | 2<br>0<br>1<br>5 |
| Rh<br>eu<br>ma<br>toi<br>d<br>Ar<br>thr<br>itis | C<br>00<br>03<br>87<br>3 | MS<br>C             | 9<br>2<br>4<br>2      | O606<br>82 | musculi<br>n                                                     | 24<br>1 | 0<br>.<br>4<br>7<br>5 | 0<br>.<br>8<br>4<br>6 | 0.<br>0<br>2<br>4<br>6<br>5<br>1 | 0.<br>04 |  | 1            | 4 | 0 | 20<br>18 | 2<br>0<br>1<br>9 |
| Rh<br>eu<br>ma<br>toi<br>d<br>Ar<br>thr<br>itis | C<br>00<br>03<br>87<br>3 | CD<br>27            | 9<br>3<br>9           | P2684<br>2 | CD27<br>molecule                                                 | 15<br>4 | 0<br>.<br>5<br>1<br>7 | 0<br>.<br>6<br>9<br>2 | 0.<br>0<br>1<br>0<br>1<br>1      | 0.<br>04 |  | 0.<br>7<br>5 | 4 | 0 | 19<br>96 | 2<br>0<br>1<br>8 |
| Rh<br>eu<br>ma<br>toi<br>d<br>Ar<br>thr<br>itis | C<br>00<br>03<br>87<br>3 | AD<br>AM<br>10      | 1<br>0<br>2           | O146<br>72 | ADAM<br>metallopeptid<br>ase domain 10                           | 22<br>4 | 0<br>.<br>4<br>8<br>9 | 0<br>.<br>8<br>4<br>6 | 1                                | 0.<br>03 |  | 1            | 3 | 0 | 20<br>15 | 2<br>0<br>1<br>8 |
| Rh<br>eu<br>ma<br>toi<br>d<br>Ar<br>thr<br>itis | C<br>00<br>03<br>87<br>3 | DD<br>X3<br>9A      | 1<br>0<br>2<br>1<br>2 | O001<br>48 | DExD-box<br>helicase 39A                                         | 37      | 0<br>.<br>6<br>7<br>4 | 0<br>.<br>6<br>9<br>2 | 0.<br>6<br>0<br>1<br>5<br>1      | 0.<br>03 |  | 1            | 3 | 0 | 20<br>01 | 2<br>0<br>0<br>8 |
| Rh<br>eu<br>ma<br>toi                           | C<br>00<br>03            | SP<br>RY<br>2       | 1<br>0<br>2           | O435<br>97 | sprouty<br>RTK<br>signalin<br>g                                  | 11<br>1 | 0<br>.<br>5           | 0<br>.<br>6           | 0.<br>9<br>7<br>1                | 0.<br>03 |  | 1            | 3 | 0 | 20<br>15 | 2<br>0<br>1<br>8 |

|                                                 |                          |                      |                                  |                               |                                                                                |                                                |         |                       |                       |                                  |          |  |   |   |   |          |                  |
|-------------------------------------------------|--------------------------|----------------------|----------------------------------|-------------------------------|--------------------------------------------------------------------------------|------------------------------------------------|---------|-----------------------|-----------------------|----------------------------------|----------|--|---|---|---|----------|------------------|
| d<br>Ar<br>thr<br>itis                          | 87<br>3                  |                      | 5<br>3                           |                               | antagoni<br>st 2                                                               |                                                |         | 5<br>4                | 5<br>4                | 2<br>6                           |          |  |   |   |   |          |                  |
| Rh<br>eu<br>ma<br>toi<br>d<br>Ar<br>thr<br>itis | C<br>00<br>03<br>87<br>3 | SIK<br>1B            | 1.<br>0<br>3<br>E<br>+<br>0<br>8 | A0A0<br>B4J2F<br>2;P57<br>059 | salt inducible<br>kinase 1B<br>(putative)                                      |                                                | 48      | 0<br>.<br>6<br>5<br>3 | 0<br>.<br>3<br>8<br>5 |                                  | 0.<br>03 |  | 1 | 3 | 0 | 20<br>17 | 2<br>0<br>1<br>9 |
| Rh<br>eu<br>ma<br>toi<br>d<br>Ar<br>thr<br>itis | C<br>00<br>03<br>87<br>3 | KL<br>F2             | 1<br>0<br>3<br>6<br>5            | Q9Y5<br>W3                    | Kruppel<br>like<br>factor 2                                                    | Nu<br>cle<br>ic<br>aci<br>d<br>bin<br>din<br>g | 13<br>2 | 0<br>.<br>5<br>4<br>2 | 0<br>.<br>6<br>9<br>2 | 0.<br>5<br>6<br>0<br>4<br>4      | 0.<br>03 |  | 1 | 3 | 0 | 20<br>15 | 2<br>0<br>1<br>9 |
| Rh<br>eu<br>ma<br>toi<br>d<br>Ar<br>thr<br>itis | C<br>00<br>03<br>87<br>3 | NO<br>D1             | 1<br>0<br>3<br>9<br>2            | Q9Y2<br>39                    | nucleoti<br>de<br>binding<br>oligome<br>rization<br>domain<br>containi<br>ng 1 | En<br>zy<br>me                                 | 13<br>6 | 0<br>.<br>5<br>4<br>1 | 0<br>.<br>7<br>6<br>9 | 2.<br>4<br>6<br>E<br>-<br>1<br>8 | 0.<br>03 |  | 1 | 3 | 0 | 20<br>08 | 2<br>0<br>1<br>3 |
| Rh<br>eu<br>ma<br>toi<br>d<br>Ar<br>thr<br>itis | C<br>00<br>03<br>87<br>3 | PD<br>PN             | 1<br>0<br>6<br>3<br>0            | Q86Y<br>L7                    | podoplanin                                                                     |                                                | 25<br>6 | 0<br>.<br>4<br>7      | 0<br>.<br>7<br>6<br>9 | 0.<br>0<br>0<br>0<br>3<br>2      | 0.<br>03 |  | 1 | 3 | 0 | 20<br>14 | 2<br>0<br>1<br>9 |
| Rh<br>eu<br>ma<br>toi<br>d<br>Ar<br>thr<br>itis | C<br>00<br>03<br>87<br>3 | TR<br>AF<br>3IP<br>2 | 1<br>0<br>7<br>5<br>8            | O437<br>34                    | TRAF3<br>interacting<br>protein 2                                              |                                                | 10<br>3 | 0<br>.<br>5<br>8<br>5 | 0<br>.<br>6<br>9<br>2 | 1.<br>6<br>2<br>E<br>-<br>0<br>9 | 0.<br>03 |  | 1 | 3 | 0 | 20<br>13 | 2<br>0<br>1<br>7 |
| Rh<br>eu<br>ma<br>toi<br>d<br>Ar<br>thr<br>itis | C<br>00<br>03<br>87<br>3 | HP<br>SE             | 1<br>0<br>8<br>5<br>5            | Q9Y2<br>51                    | heparan<br>ase                                                                 | En<br>zy<br>me                                 | 39<br>3 | 0<br>.<br>4<br>2<br>5 | 0<br>.<br>8<br>0<br>8 | 2.<br>2<br>7<br>E<br>-<br>1<br>4 | 0.<br>03 |  | 1 | 3 | 0 | 20<br>08 | 2<br>0<br>1<br>7 |

|                      |          |         |        |        |                                                          |             |     |       |       |          |      |  |   |   |   |      |      |
|----------------------|----------|---------|--------|--------|----------------------------------------------------------|-------------|-----|-------|-------|----------|------|--|---|---|---|------|------|
| Rheumatoid Arthritis | C0003873 | LILRA3  | 11026  | Q8N6C8 | leukocyte immunoglobulin like receptor A3                | Receptor    | 19  | 0.722 | 0.5   | 1.45E-06 | 0.03 |  | 1 | 3 | 0 | 2010 | 2015 |
| Rheumatoid Arthritis | C0003873 | ADRM1   | 11047  | Q16186 | adhesion regulating molecule 1                           |             | 51  | 0.633 | 0.538 | 0.99704  | 0.03 |  | 1 | 3 | 0 | 1989 | 2007 |
| Rheumatoid Arthritis | C0003873 | ADAMTS5 | 11096  | Q9UNA0 | ADAM metallopeptidase with thrombospondin type 1 motif 5 | Enzyme      | 85  | 0.597 | 0.654 | 8.03E-07 | 0.03 |  | 1 | 3 | 0 | 2002 | 2012 |
| Rheumatoid Arthritis | C0003873 | CD160   | 11126  | O95971 | CD160 molecule                                           |             | 87  | 0.59  | 0.615 | 6.84E-05 | 0.03 |  | 1 | 3 | 1 | 1998 | 2012 |
| Rheumatoid Arthritis | C0003873 | SLC7A9  | 11136  | P82251 | solute carrier family 7 member 9                         | Transporter | 48  | 0.666 | 0.692 | 9.06E-10 | 0.03 |  | 1 | 3 | 0 | 2001 | 2008 |
| Rheumatoid Arthritis | C0003873 | POLG2   | 11232  | Q9UHN1 | DNA polymerase gamma 2, accessory subunit                | Enzyme      | 158 | 0.558 | 0.769 | 1.53E-10 | 0.03 |  | 1 | 3 | 0 | 1992 | 2002 |
| Rheumatoid Ar        | C0003873 | PRRT2   | 112476 | Q7Z6L0 | proline rich transmembrane protein 2                     |             | 353 | 0.448 | 0.808 | 0.579    | 0.03 |  | 1 | 3 | 0 | 2006 | 2012 |



|                                                 |                          |                |                            |                               |                                                           |                                                              |         |                       |                       |                                  |          |  |   |   |   |          |                  |
|-------------------------------------------------|--------------------------|----------------|----------------------------|-------------------------------|-----------------------------------------------------------|--------------------------------------------------------------|---------|-----------------------|-----------------------|----------------------------------|----------|--|---|---|---|----------|------------------|
| thr<br>itis                                     |                          |                |                            |                               |                                                           |                                                              |         |                       |                       |                                  |          |  |   |   |   |          |                  |
| Rh<br>eu<br>ma<br>toi<br>d<br>Ar<br>thr<br>itis | C<br>00<br>03<br>87<br>3 | AC<br>OT<br>7  | 1<br>1<br>3<br>3<br>2      | O001<br>54                    | acyl-<br>CoA<br>thioester<br>ase 7                        | En<br>zy<br>me                                               | 14<br>6 | 0<br>.<br>5<br>3<br>1 | 0<br>.<br>7<br>6<br>9 | 0.<br>7<br>5<br>9<br>2<br>6      | 0.<br>03 |  | 1 | 3 | 0 | 20<br>17 | 2<br>0<br>1<br>9 |
| Rh<br>eu<br>ma<br>toi<br>d<br>Ar<br>thr<br>itis | C<br>00<br>03<br>87<br>3 | CT<br>HR<br>C1 | 1<br>1<br>5<br>9<br>0<br>8 | Q96C<br>G8                    | collagen<br>triple<br>helix<br>repeat<br>containi<br>ng 1 | En<br>zy<br>me                                               | 10<br>5 | 0<br>.<br>5<br>5<br>6 | 0<br>.<br>6<br>9<br>2 | 2.<br>6<br>7<br>E<br>-<br>0<br>5 | 0.<br>03 |  | 1 | 3 | 0 | 20<br>12 | 2<br>0<br>1<br>9 |
| Rh<br>eu<br>ma<br>toi<br>d<br>Ar<br>thr<br>itis | C<br>00<br>03<br>87<br>3 | H4-<br>16      | 1<br>2<br>1<br>5<br>0<br>4 | P6280<br>5                    | H4<br>histone<br>16                                       | Nu<br>cle<br>ic<br>aci<br>d<br>bin<br>din<br>g               | 12<br>2 | 0<br>.<br>5<br>4      | 0<br>.<br>6<br>9<br>2 | 0.<br>0<br>2<br>2<br>7<br>9      | 0.<br>03 |  | 1 | 3 | 0 | 20<br>18 | 2<br>0<br>1<br>9 |
| Rh<br>eu<br>ma<br>toi<br>d<br>Ar<br>thr<br>itis | C<br>00<br>03<br>87<br>3 | CC<br>R1       | 1<br>2<br>3<br>0           | P3224<br>6                    | C-C<br>motif<br>chemoki<br>ne<br>receptor<br>1            | G-<br>pro<br>tei<br>n<br>co<br>upl<br>ed<br>rec<br>ept<br>or | 19<br>2 | 0<br>.<br>5<br>3<br>1 | 0<br>.<br>7<br>6<br>9 | 0.<br>3<br>8<br>7<br>5           | 0.<br>03 |  | 1 | 3 | 0 | 20<br>05 | 2<br>0<br>1<br>8 |
| Rh<br>eu<br>ma<br>toi<br>d<br>Ar<br>thr<br>itis | C<br>00<br>03<br>87<br>3 | OS<br>CA<br>R  | 1<br>2<br>6<br>0<br>1<br>4 | Q8IY<br>S5                    | osteoclast<br>associated<br>Ig-<br>like receptor          |                                                              | 17      | 0<br>.<br>7<br>4<br>3 | 0<br>.<br>4<br>6<br>2 | 0.<br>0<br>0<br>3<br>3<br>6      | 0.<br>03 |  | 1 | 3 | 0 | 20<br>11 | 2<br>0<br>1<br>7 |
| Rh<br>eu<br>ma<br>toi<br>d<br>Ar<br>thr<br>itis | C<br>00<br>03<br>87<br>3 | SIK<br>1       | 1<br>5<br>0<br>0<br>9<br>4 | A0A0<br>B4J2F<br>2;P57<br>059 | salt<br>inducibl<br>e kinase<br>1                         | Ki<br>nas<br>e                                               | 15<br>7 | 0<br>.<br>5<br>4<br>4 | 0<br>.<br>7<br>3<br>1 | 0.<br>9<br>3<br>7<br>1<br>6      | 0.<br>03 |  | 1 | 3 | 0 | 20<br>17 | 2<br>0<br>1<br>9 |
| Rh<br>eu                                        | C<br>00                  | CD<br>55       | 1<br>6                     | P0817<br>4                    | CD55<br>molecule                                          |                                                              | 18<br>7 | 0<br>.<br>.           | 0<br>.<br>.           | 5.<br>6                          | 0.<br>03 |  | 1 | 3 | 0 | 20<br>10 | 2<br>0           |

|                                                 |                          |                     |                  |            |                                                                |                                                |         |                       |                       |                                  |          |  |   |   |   |          |                  |
|-------------------------------------------------|--------------------------|---------------------|------------------|------------|----------------------------------------------------------------|------------------------------------------------|---------|-----------------------|-----------------------|----------------------------------|----------|--|---|---|---|----------|------------------|
| ma<br>toi<br>d<br>Ar<br>thr<br>itis             | 03<br>87<br>3            |                     | 0<br>4           |            | (Cromer blood<br>group)                                        |                                                |         | 5<br>1                | 8<br>0<br>8           | 8<br>E<br>-<br>1<br>2            |          |  |   |   |   |          | 1<br>9           |
| Rh<br>eu<br>ma<br>toi<br>d<br>Ar<br>thr<br>itis | C<br>00<br>03<br>87<br>3 | DB<br>P             | 1<br>6<br>2<br>8 | Q105<br>86 | D-box<br>binding<br>PAR<br>bZIP<br>transcrip<br>tion<br>factor | Nu<br>cle<br>ic<br>aci<br>d<br>bin<br>din<br>g | 10<br>5 | 0<br>.<br>5<br>5<br>6 | 0<br>.<br>7<br>3<br>1 | 0.<br>2<br>3<br>3<br>7<br>6      | 0.<br>03 |  | 1 | 3 | 0 | 20<br>14 | 2<br>0<br>1<br>8 |
| Rh<br>eu<br>ma<br>toi<br>d<br>Ar<br>thr<br>itis | C<br>00<br>03<br>87<br>3 | GA<br>DD<br>45<br>A | 1<br>6<br>4<br>7 | P2452<br>2 | growth arrest<br>and DNA<br>damage<br>inducible<br>alpha       |                                                | 15<br>1 | 0<br>.<br>5<br>2<br>6 | 0<br>.<br>7<br>6<br>9 | 0.<br>0<br>4<br>4<br>0<br>7<br>5 | 0.<br>03 |  | 1 | 3 | 1 | 20<br>08 | 2<br>0<br>1<br>9 |
| Rh<br>eu<br>ma<br>toi<br>d<br>Ar<br>thr<br>itis | C<br>00<br>03<br>87<br>3 | DN<br>MT<br>3B      | 1<br>7<br>8<br>9 | Q9UB<br>C3 | DNA<br>methyltransfer<br>ase 3 beta                            |                                                | 31<br>5 | 0<br>.<br>4<br>5<br>3 | 0<br>.<br>8<br>4<br>6 | 0.<br>1<br>9<br>9<br>6<br>4      | 0.<br>03 |  | 1 | 3 | 0 | 20<br>10 | 2<br>0<br>1<br>8 |
| Rh<br>eu<br>ma<br>toi<br>d<br>Ar<br>thr<br>itis | C<br>00<br>03<br>87<br>3 | DP<br>EP<br>1       | 1<br>8<br>0<br>0 | P1644<br>4 | dipeptidase 1                                                  |                                                | 10<br>0 | 0<br>.<br>5<br>7      | 0<br>.<br>6<br>5<br>4 | 3.<br>4<br>7<br>E<br>-<br>1<br>0 | 0.<br>03 |  | 1 | 3 | 0 | 20<br>17 | 2<br>0<br>1<br>9 |
| Rh<br>eu<br>ma<br>toi<br>d<br>Ar<br>thr<br>itis | C<br>00<br>03<br>87<br>3 | E2<br>F2            | 1<br>8<br>7<br>0 | Q142<br>09 | E2F<br>transcrip<br>tion<br>factor 2                           | Nu<br>cle<br>ic<br>aci<br>d<br>bin<br>din<br>g | 75      | 0<br>.<br>5<br>9<br>9 | 0<br>.<br>6<br>9<br>2 | 0.<br>2<br>5<br>5<br>0<br>5      | 0.<br>03 |  | 1 | 3 | 0 | 20<br>14 | 2<br>0<br>1<br>8 |
| Rh<br>eu<br>ma<br>toi<br>d<br>Ar<br>thr<br>itis | C<br>00<br>03<br>87<br>3 | TY<br>MP            | 1<br>8<br>9<br>0 | P1997<br>1 | thymidi<br>ne<br>phospho<br>rylase                             | En<br>zy<br>me                                 | 24<br>6 | 0<br>.<br>4<br>9<br>5 | 0<br>.<br>7<br>6<br>9 | 0.<br>0<br>0<br>1<br>1<br>7      | 0.<br>03 |  | 1 | 3 | 0 | 20<br>14 | 2<br>0<br>1<br>9 |

|                      |          |         |        |        |                                                           |                      |     |       |         |          |      |   |   |   |      |      |
|----------------------|----------|---------|--------|--------|-----------------------------------------------------------|----------------------|-----|-------|---------|----------|------|---|---|---|------|------|
| Rheumatoid Arthritis | C0003873 | ELAV L2 | 1993   | Q12926 | ELAV like RNA binding protein 2                           |                      | 199 | 0.486 | 0.9514  | 0.03     |      | 1 | 3 | 0 | 2019 | 2019 |
| Rheumatoid Arthritis | C0003873 | PRSS5   | 203074 | Q6UWB4 | serine protease 55                                        | Enzyme               | 163 | 0.513 | 0.769   | 3.17E-11 | 0.03 | 1 | 3 | 0 | 2006 | 2017 |
| Rheumatoid Arthritis | C0003873 | EPHB1   | 2047   | P54762 | EPH receptor B1                                           | Kinase               | 169 | 0.518 | 0.9465  | 0.03     |      | 1 | 3 | 0 | 2008 | 2020 |
| Rheumatoid Arthritis | C0003873 | ERBB2   | 2064   | P04626 | erb-b2 receptor tyrosine kinase 2                         | Kinase               | 995 | 0.328 | 0.9059  | 0.03     |      | 1 | 3 | 0 | 2005 | 2017 |
| Rheumatoid Arthritis | C0003873 | ERG     | 2078   | P11308 | ETS transcription factor ERG                              | Transcription factor | 298 | 0.453 | 0.86413 | 0.03     |      | 1 | 3 | 0 | 1992 | 2002 |
| Rheumatoid Arthritis | C0003873 | EZH2    | 2146   | Q15910 | enhancer of zeste 2 polycomb repressive complex 2 subunit | Epigenetic regulator | 653 | 0.376 | 0.885   | 1.03     |      | 1 | 3 | 0 | 2011 | 2019 |
| Rheumatoid           | C0003    | FCGR1B  | 2210   | Q92637 | Fc fragment of IgG                                        | Cell ad              | 57  | 0.6   | 0.64E   | 1.03     |      | 1 | 3 | 0 | 1997 | 2019 |

|                                                 |                          |                     |                       |            |                                                                  |                                       |         |                       |                       |                                  |          |  |                   |   |   |          |                  |
|-------------------------------------------------|--------------------------|---------------------|-----------------------|------------|------------------------------------------------------------------|---------------------------------------|---------|-----------------------|-----------------------|----------------------------------|----------|--|-------------------|---|---|----------|------------------|
| d<br>Ar<br>thr<br>itis                          | 87<br>3                  |                     |                       |            | receptor<br>lb                                                   | hes<br>ion                            |         | 3<br>3                | 9<br>2                | -<br>1<br>0                      |          |  |                   |   |   |          |                  |
| Rh<br>eu<br>ma<br>toi<br>d<br>Ar<br>thr<br>itis | C<br>00<br>03<br>87<br>3 | FC<br>N1            | 2<br>2<br>1<br>9      | O006<br>02 | ficolin 1                                                        | Sig<br>nal<br>ing                     | 43      | 0<br>.<br>6<br>4<br>7 | 0<br>.<br>5<br>7<br>7 | 3.<br>9<br>7<br>E<br>-<br>1<br>7 | 0.<br>03 |  | 0.<br>6<br>6<br>7 | 3 | 1 | 20<br>07 | 2<br>0<br>1<br>9 |
| Rh<br>eu<br>ma<br>toi<br>d<br>Ar<br>thr<br>itis | C<br>00<br>03<br>87<br>3 | FH<br>L1            | 2<br>2<br>7<br>3      | Q136<br>42 | four and a half<br>LIM domains<br>1                              |                                       | 19<br>5 | 0<br>.<br>5<br>3<br>2 | 0<br>.<br>7<br>3<br>1 | 0.<br>9<br>6<br>9<br>7<br>9      | 0.<br>03 |  | 1                 | 3 | 0 | 20<br>00 | 2<br>0<br>1<br>7 |
| Rh<br>eu<br>ma<br>toi<br>d<br>Ar<br>thr<br>itis | C<br>00<br>03<br>87<br>3 | FL<br>G             | 2<br>3<br>1<br>2      | P2093<br>0 | filaggrin                                                        | Ce<br>llul<br>ar<br>str<br>uct<br>ure | 17<br>3 | 0<br>.<br>5<br>2<br>5 | 0<br>.<br>8<br>4<br>6 | 0.<br>0<br>0<br>2<br>8<br>8      | 0.<br>03 |  | 1                 | 3 | 0 | 19<br>99 | 2<br>0<br>1<br>9 |
| Rh<br>eu<br>ma<br>toi<br>d<br>Ar<br>thr<br>itis | C<br>00<br>03<br>87<br>3 | AC<br>SB<br>G1      | 2<br>3<br>2<br>0<br>5 | Q96G<br>R2 | acyl-<br>CoA<br>synthetase<br>bubblegum<br>family<br>member<br>1 | En<br>zy<br>me                        | 73      | 0<br>.<br>6<br>0<br>3 | 0<br>.<br>6<br>5<br>4 | 3.<br>9<br>6<br>E<br>-<br>0<br>5 | 0.<br>03 |  | 1                 | 3 | 0 | 20<br>07 | 2<br>0<br>1<br>7 |
| Rh<br>eu<br>ma<br>toi<br>d<br>Ar<br>thr<br>itis | C<br>00<br>03<br>87<br>3 | FL<br>T3<br>LG      | 2<br>3<br>2<br>3      | P4977<br>1 | fms related<br>receptor<br>tyrosine<br>kinase<br>ligand<br>3     |                                       | 10<br>0 | 0<br>.<br>5<br>6<br>4 | 0<br>.<br>5<br>7<br>7 | 0.<br>9<br>4<br>0<br>4           | 0.<br>03 |  | 1                 | 3 | 0 | 20<br>08 | 2<br>0<br>1<br>3 |
| Rh<br>eu<br>ma<br>toi<br>d<br>Ar<br>thr<br>itis | C<br>00<br>03<br>87<br>3 | CL<br>EC<br>16<br>A | 2<br>3<br>2<br>7<br>4 | Q2K<br>HT3 | C-type lectin<br>domain<br>containing<br>16A                     |                                       | 67      | 0<br>.<br>6<br>1<br>2 | 0<br>.<br>6<br>5<br>4 | 0.<br>2<br>7<br>5<br>9<br>5      | 0.<br>03 |  | 0.<br>6<br>6<br>7 | 3 | 4 | 20<br>10 | 2<br>0<br>1<br>0 |

|                      |          |        |       |        |                                                                 |             |      |       |          |   |      |  |       |   |   |      |      |
|----------------------|----------|--------|-------|--------|-----------------------------------------------------------------|-------------|------|-------|----------|---|------|--|-------|---|---|------|------|
| Rheumatoid Arthritis | C0003873 | DICER1 | 23405 | Q9UPY3 | dicer 1, ribonuclease III                                       | Enzyme      | 302  | 0.446 | 0.846    | 1 | 0.03 |  | 1     | 3 | 0 | 2013 | 2018 |
| Rheumatoid Arthritis | C0003873 | SMUG1  | 23583 | Q53HV7 | single-strand-selective monofunctional uracil-DNA glycosylase 1 |             | 1034 | 0.322 | 0.90452  | 0 | 0.03 |  | 1     | 3 | 0 | 2017 | 2019 |
| Rheumatoid Arthritis | C0003873 | NUBP62 | 23636 | P37198 | nucleoporin 62                                                  | Transporter | 273  | 0.47  | 0.8506   | 0 | 0.03 |  | 1     | 3 | 0 | 2018 | 2019 |
| Rheumatoid Arthritis | C0003873 | SH3BP4 | 23677 | Q9P0V3 | SH3 domain binding protein 4                                    |             | 74   | 0.593 | 0.60254  | 0 | 0.03 |  | 1     | 3 | 0 | 2017 | 2019 |
| Rheumatoid Arthritis | C0003873 | ALOX15 | 246   | P16050 | arachidonate 15-lipoxygenase                                    | Enzyme      | 205  | 0.502 | 0.846-23 | 1 | 0.03 |  | 1     | 3 | 0 | 1999 | 2013 |
| Rheumatoid Arthritis | C0003873 | FRZB   | 2487  | Q92765 | frizzled related protein                                        |             | 89   | 0.573 | 0.601084 | 0 | 0.03 |  | 0.667 | 3 | 0 | 1998 | 2017 |
| Rheumatoid Ar        | C0003873 | AOX1   | 26    | P19801 | amine oxidase copper containing 1                               |             | 61   | 0.628 | 0.769    | 6 | 0.03 |  | 1     | 3 | 0 | 2018 | 2019 |

|                                                 |                          |                |                            |            |                                                                            |                   |         |                       |                       |                                  |          |  |   |   |   |                         |
|-------------------------------------------------|--------------------------|----------------|----------------------------|------------|----------------------------------------------------------------------------|-------------------|---------|-----------------------|-----------------------|----------------------------------|----------|--|---|---|---|-------------------------|
| thr<br>itis                                     |                          |                |                            |            |                                                                            |                   |         |                       | 0<br>8                |                                  |          |  |   |   |   |                         |
| Rh<br>eu<br>ma<br>toi<br>d<br>Ar<br>thr<br>itis | C<br>00<br>03<br>87<br>3 | CO<br>PD       | 2<br>6<br>0<br>4<br>3<br>1 |            | Pulmonary<br>disease,<br>chronic<br>obstructive,<br>severe early-<br>onset |                   | 34<br>9 | 0<br>.<br>4<br>5<br>6 | 0<br>.<br>8<br>8<br>5 |                                  | 0.<br>03 |  | 1 | 3 | 0 | 20<br>17<br>0<br>1<br>9 |
| Rh<br>eu<br>ma<br>toi<br>d<br>Ar<br>thr<br>itis | C<br>00<br>03<br>87<br>3 | MS<br>TN       | 2<br>6<br>6<br>0           | O147<br>93 | myostati<br>n                                                              | Sig<br>nal<br>ing | 15<br>9 | 0<br>.<br>5<br>2<br>8 | 0<br>.<br>7<br>3<br>1 | 0.<br>5<br>0<br>5<br>2           | 0.<br>03 |  | 1 | 3 | 0 | 20<br>17<br>0<br>1<br>9 |
| Rh<br>eu<br>ma<br>toi<br>d<br>Ar<br>thr<br>itis | C<br>00<br>03<br>87<br>3 | GD<br>NF       | 2<br>6<br>6<br>8           | P3990<br>5 | glial cell<br>derived<br>neurotro<br>phic<br>factor                        | Sig<br>nal<br>ing | 40<br>9 | 0<br>.<br>4<br>3<br>4 | 0<br>.<br>8<br>8<br>5 | 0.<br>2<br>0<br>3<br>5           | 0.<br>03 |  | 1 | 3 | 0 | 20<br>00<br>0<br>1<br>8 |
| Rh<br>eu<br>ma<br>toi<br>d<br>Ar<br>thr<br>itis | C<br>00<br>03<br>87<br>3 | SG<br>SM<br>3  | 2<br>7<br>3<br>5<br>2      | Q96H<br>U1 | small G<br>protein<br>signalin<br>g<br>modulat<br>or 3                     | En<br>zy<br>me    | 25<br>9 | 0<br>.<br>4<br>6<br>9 | 0<br>.<br>8<br>0<br>8 | 3.<br>4<br>1<br>E<br>-<br>1<br>5 | 0.<br>03 |  | 1 | 3 | 0 | 20<br>04<br>0<br>1<br>8 |
| Rh<br>eu<br>ma<br>toi<br>d<br>Ar<br>thr<br>itis | C<br>00<br>03<br>87<br>3 | GL<br>S        | 2<br>7<br>4<br>4           | O949<br>25 | glutamin<br>ase                                                            | En<br>zy<br>me    | 21<br>7 | 0<br>.<br>4<br>8<br>9 | 0<br>.<br>8<br>0<br>8 | 0.<br>9<br>6<br>1<br>5<br>4      | 0.<br>03 |  | 1 | 3 | 0 | 20<br>07<br>0<br>1<br>7 |
| Rh<br>eu<br>ma<br>toi<br>d<br>Ar<br>thr<br>itis | C<br>00<br>03<br>87<br>3 | PY<br>CA<br>RD | 2<br>9<br>1<br>0<br>8      | Q9UL<br>Z3 | PYD<br>and<br>CARD<br>domain<br>containi<br>ng                             | En<br>zy<br>me    | 29<br>4 | 0<br>.<br>4<br>5<br>7 | 0<br>.<br>8<br>0<br>8 | 0.<br>0<br>0<br>1<br>9<br>8      | 0.<br>03 |  | 1 | 3 | 0 | 20<br>05<br>0<br>1<br>9 |
| Rh<br>eu<br>ma<br>toi                           | C<br>00<br>03            | CX<br>CL<br>1  | 2<br>9<br>1<br>9           | P0934<br>1 | C-X-C<br>motif<br>chemoki                                                  | Sig<br>nal<br>ing | 31<br>5 | 0<br>.<br>4           | 0<br>.<br>9           | 0.<br>1<br>1<br>8                | 0.<br>03 |  | 1 | 3 | 0 | 19<br>99<br>0<br>1<br>7 |

|                                                 |                          |                      |                  |            |                                                                               |                                             |         |                       |                       |                                  |          |  |   |   |   |          |                  |
|-------------------------------------------------|--------------------------|----------------------|------------------|------------|-------------------------------------------------------------------------------|---------------------------------------------|---------|-----------------------|-----------------------|----------------------------------|----------|--|---|---|---|----------|------------------|
| d<br>Ar<br>thr<br>itis                          | 87<br>3                  |                      |                  |            | ne<br>ligand 1                                                                |                                             |         | 4<br>9                | 2<br>3                | 4<br>5                           |          |  |   |   |   |          |                  |
| Rh<br>eu<br>ma<br>toi<br>d<br>Ar<br>thr<br>itis | C<br>00<br>03<br>87<br>3 | GT<br>F2<br>H1       | 2<br>9<br>6<br>5 | P3278<br>0 | general<br>transcrip<br>tion<br>factor<br>IIH<br>subunit<br>1                 | Tr<br>ans<br>cri<br>pti<br>on<br>fac<br>tor | 25<br>8 | 0<br>.<br>4<br>6<br>9 | 0<br>.<br>8<br>4<br>6 | 0.<br>9<br>8<br>9<br>8<br>2      | 0.<br>03 |  | 1 | 3 | 0 | 20<br>18 | 2<br>0<br>1<br>9 |
| Rh<br>eu<br>ma<br>toi<br>d<br>Ar<br>thr<br>itis | C<br>00<br>03<br>87<br>3 | GT<br>F2I            | 2<br>9<br>6<br>9 | P7834<br>7 | general<br>transcription<br>factor Iii                                        |                                             | 24<br>9 | 0<br>.<br>5           | 0<br>.<br>8<br>0<br>8 | 0.<br>9<br>9<br>5<br>9<br>2      | 0.<br>03 |  | 1 | 3 | 1 | 20<br>16 | 2<br>0<br>1<br>9 |
| Rh<br>eu<br>ma<br>toi<br>d<br>Ar<br>thr<br>itis | C<br>00<br>03<br>87<br>3 | GU<br>SB             | 2<br>9<br>9<br>0 | P0823<br>6 | glucuronidase<br>beta                                                         |                                             | 18<br>3 | 0<br>.<br>5<br>3      | 0<br>.<br>8<br>4<br>6 | 4.<br>0<br>4<br>E<br>-<br>0<br>8 | 0.<br>03 |  | 1 | 3 | 0 | 20<br>03 | 2<br>0<br>1<br>4 |
| Rh<br>eu<br>ma<br>toi<br>d<br>Ar<br>thr<br>itis | C<br>00<br>03<br>87<br>3 | GZ<br>MA             | 3<br>0<br>0<br>1 | P1254<br>4 | granzym<br>e A                                                                | En<br>zy<br>me                              | 65      | 0<br>.<br>5<br>9<br>7 | 0<br>.<br>7<br>3<br>1 | 2.<br>0<br>5<br>E<br>-<br>0<br>6 | 0.<br>03 |  | 1 | 3 | 0 | 19<br>92 | 2<br>0<br>1<br>7 |
| Rh<br>eu<br>ma<br>toi<br>d<br>Ar<br>thr<br>itis | C<br>00<br>03<br>87<br>3 | HF<br>E              | 3<br>0<br>7<br>7 | Q302<br>01 | homeostatic<br>iron regulator                                                 |                                             | 41<br>5 | 0<br>.<br>4<br>3<br>6 | 0<br>.<br>8<br>4<br>6 | 2.<br>5<br>6<br>E<br>-<br>0<br>8 | 0.<br>03 |  | 1 | 3 | 2 | 20<br>00 | 2<br>0<br>0<br>6 |
| Rh<br>eu<br>ma<br>toi<br>d<br>Ar<br>thr<br>itis | C<br>00<br>03<br>87<br>3 | HL<br>A-<br>DR<br>B5 | 3<br>1<br>2<br>7 | Q301<br>54 | major<br>histoco<br>mpatibil<br>ity<br>complex<br>, class II,<br>DR beta<br>5 | Im<br>mu<br>ne<br>res<br>po<br>nse          | 62      | 0<br>.<br>6<br>0<br>8 | 0<br>.<br>7<br>3<br>1 | 3.<br>6<br>4<br>E<br>-<br>0<br>7 | 0.<br>03 |  | 1 | 3 | 0 | 19<br>90 | 2<br>0<br>1<br>9 |

|                      |          |           |        |        |                                                     |                      |     |       |       |          |      |  |       |   |   |      |      |
|----------------------|----------|-----------|--------|--------|-----------------------------------------------------|----------------------|-----|-------|-------|----------|------|--|-------|---|---|------|------|
| Rheumatoid Arthritis | C0003873 | HMOX1     | 3162   | P09601 | heme oxygenase 1                                    |                      | 666 | 0.381 | 0.923 | 0.09682  | 0.03 |  | 1     | 3 | 0 | 2007 | 2010 |
| Rheumatoid Arthritis | C0003873 | HOXC6     | 3223   | P09630 | homeobox C6                                         | Transcription factor | 80  | 0.595 | 0.692 | 0.5165   | 0.03 |  | 1     | 3 | 1 | 2019 | 2019 |
| Rheumatoid Arthritis | C0003873 | HSPP90AA1 | 3320   | P07900 | heat shock protein 90 alpha family class A member 1 | Chaperone            | 455 | 0.411 | 0.923 | 0.8625   | 0.03 |  | 1     | 3 | 0 | 2018 | 2019 |
| Rheumatoid Arthritis | C0003873 | APOB      | 338    | P04114 | apolipoprotein B                                    |                      | 339 | 0.453 | 0.808 | 1.92E-16 | 0.03 |  | 1     | 3 | 0 | 2012 | 2019 |
| Rheumatoid Arthritis | C0003873 | IDDM8     | 3407   |        | insulin dependent diabetes mellitus 8               |                      | 7   | 0.821 | 0.192 |          | 0.03 |  | 0.667 | 3 | 0 | 2000 | 2010 |
| Rheumatoid Arthritis | C0003873 | ACTB      | 34551  | Q562R1 | actin beta like 2                                   |                      | 134 | 0.539 | 0.769 | 5.82E-16 | 0.03 |  | 1     | 3 | 0 | 2017 | 2019 |
| Rheumatoid Ar        | C0003873 | H3P44     | 347376 |        | H3 histone pseudogene 44                            |                      | 40  | 0.636 | 0.462 |          | 0.03 |  | 1     | 3 | 0 | 1992 | 2002 |



|                      |          |         |      |        |                                   |                            |     |     |      |          |      |  |   |   |   |      |      |
|----------------------|----------|---------|------|--------|-----------------------------------|----------------------------|-----|-----|------|----------|------|--|---|---|---|------|------|
| thritis              |          |         |      |        |                                   |                            |     |     |      |          |      |  |   |   |   |      |      |
| Rheumatoid Arthritis | C0003873 | IGF2    | 3481 | P01344 | insulin like growth factor 2      |                            | 604 | 039 | 0885 | 0.044127 | 0.03 |  | 1 | 3 | 0 | 1995 | 2010 |
| Rheumatoid Arthritis | C0003873 | IL1R1   | 3554 | P14778 | interleukin 1 receptor type 1     | Receptor                   | 184 | 059 | 0769 | 0.15126  | 0.03 |  | 1 | 3 | 0 | 1997 | 2015 |
| Rheumatoid Arthritis | C0003873 | CXCR1   | 3577 | P25024 | C-X-C motif chemokine receptor 1  | G-protein coupled receptor | 167 | 058 | 079  | 3.03E-07 | 0.03 |  | 1 | 3 | 0 | 2003 | 2019 |
| Rheumatoid Arthritis | C0003873 | AQP1    | 358  | P29972 | aquaporin 1 (Colton blood group)  | Ion channel                | 268 | 047 | 085  | 2.57E-07 | 0.03 |  | 1 | 3 | 0 | 2013 | 2018 |
| Rheumatoid Arthritis | C0003873 | TNFRSF9 | 3604 | Q07011 | TNF receptor superfamily member 9 |                            | 177 | 052 | 079  | 0.32153  | 0.03 |  | 1 | 3 | 0 | 1998 | 2008 |
| Rheumatoid Arthritis | C0003873 | IRF1    | 3659 | P10914 | interferon regulatory factor 1    | Transcription factor       | 257 | 048 | 0769 | 0.9909   | 0.03 |  | 1 | 3 | 0 | 2012 | 2016 |

|                      |          |         |      |        |                                                                                      |             |     |       |       |          |      |  |   |   |   |      |      |
|----------------------|----------|---------|------|--------|--------------------------------------------------------------------------------------|-------------|-----|-------|-------|----------|------|--|---|---|---|------|------|
| Rheumatoid Arthritis | C0003873 | IRS1    | 3667 | P35568 | insulin receptor substrate 1                                                         |             | 233 | 0.488 | 0.769 | 0.023645 | 0.03 |  | 1 | 3 | 1 | 2015 | 2018 |
| Rheumatoid Arthritis | C0003873 | ITGA4   | 3676 | P13612 | integrin subunit alpha 4                                                             |             | 123 | 0.558 | 0.769 | 0.00101  | 0.03 |  | 1 | 3 | 0 | 2000 | 2017 |
| Rheumatoid Arthritis | C0003873 | ABCC6   | 3688 | O95255 | ATP binding cassette subfamily C member 6                                            | Transporter | 181 | 0.544 | 0.654 | 5.62E-35 | 0.03 |  | 1 | 3 | 0 | 1988 | 2017 |
| Rheumatoid Arthritis | C0003873 | ITGAL   | 3683 | P20701 | integrin subunit alpha L                                                             |             | 169 | 0.511 | 0.815 | 0.004321 | 0.03 |  | 1 | 3 | 0 | 1988 | 2016 |
| Rheumatoid Arthritis | C0003873 | ITGB2   | 3689 | P05107 | integrin subunit beta 2                                                              | Receptor    | 340 | 0.444 | 0.923 | 5.08E-15 | 0.03 |  | 1 | 3 | 0 | 1988 | 2009 |
| Rheumatoid Arthritis | C0003873 | KIR2DL1 | 3802 | P43626 | killer cell immunoglobulin like receptor, two Ig domains and long cytoplasmic tail 1 | Receptor    | 49  | 0.631 | 0.615 | 3.57E-15 | 0.03 |  | 1 | 3 | 0 | 2007 | 2015 |

|                      |          |        |        |        |                                                     |                      |     |       |        |          |      |  |   |   |   |      |      |
|----------------------|----------|--------|--------|--------|-----------------------------------------------------|----------------------|-----|-------|--------|----------|------|--|---|---|---|------|------|
| Rheumatoid Arthritis | C0003873 | KLRC2  | 3822   | P26717 | killer cell lectin like receptor C2                 |                      | 50  | 0.636 | 0.731  | 4.87E-10 | 0.03 |  | 1 | 3 | 0 | 2003 | 2008 |
| Rheumatoid Arthritis | C0003873 | KLRD1  | 3824   | Q13241 | killer cell lectin like receptor D1                 |                      | 53  | 0.636 | 0.692  | 0.00875  | 0.03 |  | 1 | 3 | 1 | 2003 | 2016 |
| Rheumatoid Arthritis | C0003873 | NP SR1 | 387129 | Q6W5P4 | neuropeptide S receptor 1                           |                      | 69  | 0.608 | 0.615  | 2.05E-09 | 0.03 |  | 1 | 3 | 3 | 2010 | 2019 |
| Rheumatoid Arthritis | C0003873 | LRP5   | 4041   | O75197 | LDL receptor related protein 5                      |                      | 283 | 0.485 | 0.8492 | 0.00592  | 0.03 |  | 1 | 3 | 3 | 2009 | 2018 |
| Rheumatoid Arthritis | C0003873 | LTB    | 4050   | Q06643 | lymphot oxin beta                                   | Signaling            | 110 | 0.555 | 0.769  | 9.61E-11 | 0.03 |  | 1 | 3 | 0 | 1999 | 2015 |
| Rheumatoid Arthritis | C0003873 | ARNTL  | 406    | O00327 | aryl hydrocarbon receptor nuclear translocator like | Transcription factor | 200 | 0.51  | 0.885  | 0.9944   | 0.03 |  | 1 | 3 | 0 | 2013 | 2015 |
| Rheumatoid Ar        | C0003873 | MIR140 | 406932 |        | microRNA 140                                        |                      | 144 | 0.522 | 0.769  |          | 0.03 |  | 1 | 3 | 0 | 2016 | 2018 |

|                                                 |                          |                     |                            |            |                                       |                                             |         |                       |                       |                             |          |  |                   |   |   |          |                  |
|-------------------------------------------------|--------------------------|---------------------|----------------------------|------------|---------------------------------------|---------------------------------------------|---------|-----------------------|-----------------------|-----------------------------|----------|--|-------------------|---|---|----------|------------------|
| thr<br>itis                                     |                          |                     |                            |            |                                       |                                             |         |                       |                       |                             |          |  |                   |   |   |          |                  |
| Rh<br>eu<br>ma<br>toi<br>d<br>Ar<br>thr<br>itis | C<br>00<br>03<br>87<br>3 | MI<br>R1<br>43      | 4<br>0<br>6<br>9<br>3<br>5 |            | microRNA<br>143                       |                                             | 26<br>7 | 0<br>.<br>4<br>6<br>2 | 0<br>.<br>8<br>8<br>5 |                             | 0.<br>03 |  | 1                 | 3 | 0 | 20<br>17 | 2<br>0<br>1<br>8 |
| Rh<br>eu<br>ma<br>toi<br>d<br>Ar<br>thr<br>itis | C<br>00<br>03<br>87<br>3 | MI<br>R2<br>0A      | 4<br>0<br>6<br>9<br>8<br>2 |            | microRNA<br>20a                       |                                             | 18<br>0 | 0<br>.<br>4<br>9<br>8 | 0<br>.<br>7<br>6<br>9 |                             | 0.<br>03 |  | 1                 | 3 | 0 | 20<br>16 | 2<br>0<br>1<br>8 |
| Rh<br>eu<br>ma<br>toi<br>d<br>Ar<br>thr<br>itis | C<br>00<br>03<br>87<br>3 | MI<br>R2<br>3B      | 4<br>0<br>7<br>0<br>1<br>1 |            | microRNA<br>23b                       |                                             | 13<br>7 | 0<br>.<br>5<br>2<br>3 | 0<br>.<br>8<br>0<br>8 |                             | 0.<br>03 |  | 1                 | 3 | 0 | 20<br>12 | 2<br>0<br>1<br>9 |
| Rh<br>eu<br>ma<br>toi<br>d<br>Ar<br>thr<br>itis | C<br>00<br>03<br>87<br>3 | MI<br>R2<br>7A      | 4<br>0<br>7<br>0<br>1<br>8 |            | microRNA<br>27a                       |                                             | 24<br>8 | 0<br>.<br>4<br>6<br>6 | 0<br>.<br>8<br>4<br>6 |                             | 0.<br>03 |  | 1                 | 3 | 0 | 20<br>16 | 2<br>0<br>1<br>9 |
| Rh<br>eu<br>ma<br>toi<br>d<br>Ar<br>thr<br>itis | C<br>00<br>03<br>87<br>3 | MI<br>R1<br>7H<br>G | 4<br>0<br>7<br>9<br>7<br>5 | Q75N<br>E6 | miR-17-92a-1<br>cluster host<br>gene  |                                             | 22<br>4 | 0<br>.<br>4<br>8<br>3 | 0<br>.<br>8<br>0<br>8 |                             | 0.<br>03 |  | 1                 | 3 | 0 | 20<br>13 | 2<br>0<br>1<br>8 |
| Rh<br>eu<br>ma<br>toi<br>d<br>Ar<br>thr<br>itis | C<br>00<br>03<br>87<br>3 | SM<br>AD<br>3       | 4<br>0<br>8<br>8           | P8402<br>2 | SMAD<br>family<br>member<br>3         | Tr<br>ans<br>cri<br>pti<br>on<br>fac<br>tor | 47<br>0 | 0<br>.<br>4<br>1<br>5 | 0<br>.<br>9<br>2<br>3 | 0.<br>7<br>9<br>7<br>9<br>6 | 0.<br>03 |  | 0.<br>3<br>3<br>3 | 3 | 3 | 20<br>13 | 2<br>0<br>1<br>9 |
| Rh<br>eu<br>ma<br>toi                           | C<br>00<br>03            | MA<br>P3<br>K5      | 4<br>2<br>1<br>7           | Q996<br>83 | mitogen<br>-<br>activate<br>d protein | Ki<br>nas<br>e                              | 17<br>0 | 0<br>.<br>5           | 0<br>.<br>8           | 0.<br>5<br>1<br>9           | 0.<br>03 |  | 1                 | 3 | 0 | 20<br>05 | 2<br>0<br>1<br>8 |

|                                                 |                          |                     |                            |            |                                                          |                |         |                       |                       |                                  |          |  |   |   |   |          |                  |
|-------------------------------------------------|--------------------------|---------------------|----------------------------|------------|----------------------------------------------------------|----------------|---------|-----------------------|-----------------------|----------------------------------|----------|--|---|---|---|----------|------------------|
| d<br>Ar<br>thr<br>itis                          | 87<br>3                  |                     |                            |            | kinase<br>kinase<br>kinase 5                             |                |         | 1<br>3                | 0<br>8                | 6<br>4                           |          |  |   |   |   |          |                  |
| Rh<br>eu<br>ma<br>toi<br>d<br>Ar<br>thr<br>itis | C<br>00<br>03<br>87<br>3 | FO<br>XO<br>4       | 4<br>3<br>0<br>3           | P9817<br>7 | forkhead<br>O4                                           | box            | 84      | 0<br>.<br>5<br>8<br>8 | 0<br>.<br>7<br>6<br>9 | 0.<br>8<br>1<br>3<br>3<br>2      | 0.<br>03 |  | 1 | 3 | 0 | 20<br>07 | 2<br>0<br>1<br>9 |
| Rh<br>eu<br>ma<br>toi<br>d<br>Ar<br>thr<br>itis | C<br>00<br>03<br>87<br>3 | MP<br>G             | 4<br>3<br>5<br>0           | P2937<br>2 | N-<br>methyln<br>urine<br>DNA<br>glycosyl<br>ase         | En<br>zy<br>me | 74      | 0<br>.<br>5<br>9<br>7 | 0<br>.<br>7<br>3<br>1 | 1.<br>9<br>5<br>E<br>-<br>1<br>2 | 0.<br>03 |  | 1 | 3 | 4 | 20<br>10 | 2<br>0<br>1<br>9 |
| Rh<br>eu<br>ma<br>toi<br>d<br>Ar<br>thr<br>itis | C<br>00<br>03<br>87<br>3 | MP<br>P1            | 4<br>3<br>5<br>4           | Q000<br>13 | membra<br>ne<br>palmitoy<br>lated<br>protein 1           | En<br>zy<br>me | 54      | 0<br>.<br>6<br>1<br>7 | 0<br>.<br>5<br>7<br>7 | 0.<br>9<br>8<br>7<br>7           | 0.<br>03 |  | 1 | 3 | 0 | 19<br>92 | 2<br>0<br>0<br>2 |
| Rh<br>eu<br>ma<br>toi<br>d<br>Ar<br>thr<br>itis | C<br>00<br>03<br>87<br>3 | PO<br>TE<br>KP      | 4<br>4<br>0<br>9<br>1<br>5 | Q9BY<br>X7 | POTE ankyrin<br>domain family<br>member K,<br>pseudogene |                | 13<br>1 | 0<br>.<br>5<br>4<br>2 | 0<br>.<br>7<br>6<br>9 |                                  | 0.<br>03 |  | 1 | 3 | 0 | 20<br>17 | 2<br>0<br>1<br>9 |
| Rh<br>eu<br>ma<br>toi<br>d<br>Ar<br>thr<br>itis | C<br>00<br>03<br>87<br>3 | MI<br>R3<br>23<br>A | 4<br>4<br>2<br>8<br>9<br>7 |            | microRNA<br>323a                                         |                | 46      | 0<br>.<br>6<br>4<br>1 | 0<br>.<br>5<br>7<br>7 |                                  | 0.<br>03 |  | 1 | 3 | 0 | 20<br>12 | 2<br>0<br>1<br>4 |
| Rh<br>eu<br>ma<br>toi<br>d<br>Ar<br>thr<br>itis | C<br>00<br>03<br>87<br>3 | MI<br>R3<br>38      | 4<br>4<br>2<br>9<br>0<br>6 |            | microRNA<br>338                                          |                | 12<br>8 | 0<br>.<br>5<br>3<br>5 | 0<br>.<br>8<br>0<br>8 |                                  | 0.<br>03 |  | 1 | 3 | 0 | 20<br>17 | 2<br>0<br>1<br>8 |

|                      |          |         |      |        |                                                                   |                      |     |       |         |          |      |  |       |   |   |      |      |
|----------------------|----------|---------|------|--------|-------------------------------------------------------------------|----------------------|-----|-------|---------|----------|------|--|-------|---|---|------|------|
| Rheumatoid Arthritis | C0003873 | MSRA    | 4482 | Q9UJ68 | methionine sulfoxide reductase A                                  | Enzyme               | 89  | 0.608 | 0.615   | 1.53E-15 | 0.03 |  | 1     | 3 | 1 | 2010 | 2013 |
| Rheumatoid Arthritis | C0003873 | MT R    | 4548 | Q99707 | 5-methyltetrahydrofolate-homocysteine methyltransferase           |                      | 245 | 0.482 | 0.808   | 2.43E-12 | 0.03 |  | 1     | 3 | 1 | 2007 | 2018 |
| Rheumatoid Arthritis | C0003873 | MT RR   | 4552 | Q9UBK8 | 5-methyltetrahydrofolate-homocysteine methyltransferase reductase |                      | 207 | 0.502 | 0.808   | 2.18E-14 | 0.03 |  | 0.667 | 3 | 1 | 2007 | 2018 |
| Rheumatoid Arthritis | C0003873 | MUC1    | 4582 | P15941 | mucin 1, cell surface associated                                  |                      | 594 | 0.384 | 0.885   | 0.01774  | 0.03 |  | 1     | 3 | 0 | 2008 | 2018 |
| Rheumatoid Arthritis | C0003873 | MYC     | 4609 | P01106 | MYC proto-oncogene, bHLH transcription factor                     | Transcription factor | 821 | 0.344 | 0.92301 | 0.99801  | 0.03 |  | 1     | 3 | 0 | 1990 | 2004 |
| Rheumatoid Arthritis | C0003873 | GADD45B | 4616 | O75293 | growth arrest and DNA damage inducible beta                       |                      | 76  | 0.585 | 0.769   | 0.21058  | 0.03 |  | 1     | 3 | 1 | 2009 | 2019 |
| Rheumatoid Ar        | C0003873 | NCAM1   | 4684 | P13591 | neural cell adhesion molecule 1                                   |                      | 445 | 0.415 | 0.885   | 0.9999   | 0.03 |  | 1     | 3 | 0 | 1996 | 2014 |

|                                                 |                          |                |                  |            |                                                                    |                |         |                       |                       |                                  |          |  |                   |   |   |          |                  |
|-------------------------------------------------|--------------------------|----------------|------------------|------------|--------------------------------------------------------------------|----------------|---------|-----------------------|-----------------------|----------------------------------|----------|--|-------------------|---|---|----------|------------------|
| thr<br>itis                                     |                          |                |                  |            |                                                                    |                |         |                       |                       |                                  |          |  |                   |   |   |          |                  |
| Rh<br>eu<br>ma<br>toi<br>d<br>Ar<br>thr<br>itis | C<br>00<br>03<br>87<br>3 | NF<br>KB<br>IA | 4<br>7<br>9<br>2 | P2596<br>3 | NFKB<br>inhibitor alpha                                            |                | 22<br>6 | 0<br>.<br>4<br>8<br>7 | 0<br>.<br>8<br>8<br>5 | 0.<br>9<br>9<br>4<br>5<br>2      | 0.<br>03 |  | 1                 | 3 | 0 | 20<br>07 | 2<br>0<br>1<br>9 |
| Rh<br>eu<br>ma<br>toi<br>d<br>Ar<br>thr<br>itis | C<br>00<br>03<br>87<br>3 | DD<br>R2       | 4<br>9<br>2<br>1 | Q168<br>32 | discoidi<br>n<br>domain<br>receptor<br>tyrosine<br>kinase 2        | Ki<br>nas<br>e | 14<br>7 | 0<br>.<br>5<br>4<br>1 | 0<br>.<br>7<br>6<br>9 | 0.<br>5<br>5<br>0<br>3           | 0.<br>03 |  | 1                 | 3 | 0 | 20<br>06 | 2<br>0<br>1<br>7 |
| Rh<br>eu<br>ma<br>toi<br>d<br>Ar<br>thr<br>itis | C<br>00<br>03<br>87<br>3 | OG<br>G1       | 4<br>9<br>6<br>8 | O155<br>27 | 8-oxoguanine<br>DNA<br>glycosylase                                 |                | 31<br>3 | 0<br>.<br>4<br>5<br>3 | 0<br>.<br>8<br>0<br>8 | 3.<br>9<br>3<br>E<br>-<br>1<br>2 | 0.<br>03 |  | 0.<br>3<br>3<br>3 | 3 | 4 | 20<br>12 | 2<br>0<br>1<br>6 |
| Rh<br>eu<br>ma<br>toi<br>d<br>Ar<br>thr<br>itis | C<br>00<br>03<br>87<br>3 | OL<br>R1       | 4<br>9<br>7<br>3 | P7838<br>0 | oxidized low<br>density<br>lipoprotein<br>receptor 1               |                | 13<br>3 | 0<br>.<br>5<br>4<br>4 | 0<br>.<br>7<br>6<br>9 | 0.<br>0<br>7<br>1<br>9<br>9      | 0.<br>03 |  | 1                 | 3 | 0 | 20<br>04 | 2<br>0<br>1<br>9 |
| Rh<br>eu<br>ma<br>toi<br>d<br>Ar<br>thr<br>itis | C<br>00<br>03<br>87<br>3 | P4<br>HB       | 5<br>0<br>3<br>4 | P0723<br>7 | prolyl 4-<br>hydroxylase<br>subunit beta                           |                | 22<br>2 | 0<br>.<br>4<br>8<br>8 | 0<br>.<br>8<br>0<br>8 | 0.<br>9<br>9<br>6<br>6<br>2      | 0.<br>03 |  | 1                 | 3 | 0 | 19<br>92 | 2<br>0<br>0<br>2 |
| Rh<br>eu<br>ma<br>toi<br>d<br>Ar<br>thr<br>itis | C<br>00<br>03<br>87<br>3 | PC<br>SK<br>6  | 5<br>0<br>4<br>6 | P2912<br>2 | proprote<br>in<br>converta<br>se<br>subtilisi<br>n/kexin<br>type 6 | En<br>zy<br>me | 65      | 0<br>.<br>6<br>2<br>6 | 0<br>.<br>5<br>3<br>8 | 5.<br>3<br>1<br>E<br>-<br>1<br>3 | 0.<br>03 |  | 1                 | 3 | 1 | 20<br>15 | 2<br>0<br>1<br>7 |
| Rh<br>eu<br>ma<br>toi                           | C<br>00<br>03            | PA<br>K3       | 5<br>0<br>6<br>3 | O759<br>14 | p21<br>(RAC1)<br>activate                                          | Ki<br>nas<br>e | 13<br>4 | 0<br>.<br>5           | 0<br>.<br>7           | 0.<br>9<br>8<br>7                | 0.<br>03 |  | 1                 | 3 | 0 | 19<br>88 | 2<br>0<br>1<br>7 |

|                                                 |                          |                 |                       |            |                                                  |                                             |         |                       |                       |                                  |          |  |                   |   |   |          |                  |
|-------------------------------------------------|--------------------------|-----------------|-----------------------|------------|--------------------------------------------------|---------------------------------------------|---------|-----------------------|-----------------------|----------------------------------|----------|--|-------------------|---|---|----------|------------------|
| d<br>Ar<br>thr<br>itis                          | 87<br>3                  |                 |                       |            | d kinase<br>3                                    |                                             |         | 6<br>9                | 3<br>1                | 1<br>6                           |          |  |                   |   |   |          |                  |
| Rh<br>eu<br>ma<br>toi<br>d<br>Ar<br>thr<br>itis | C<br>00<br>03<br>87<br>3 | DC<br>TN<br>4   | 5<br>1<br>1<br>6<br>4 | Q9UJ<br>W0 | dynactin<br>subunit 4                            |                                             | 25<br>3 | 0<br>.<br>4<br>7<br>2 | 0<br>.<br>8<br>4<br>6 | 0.<br>7<br>3<br>2<br>2<br>1      | 0.<br>03 |  | 1                 | 3 | 0 | 20<br>18 | 2<br>0<br>1<br>9 |
| Rh<br>eu<br>ma<br>toi<br>d<br>Ar<br>thr<br>itis | C<br>00<br>03<br>87<br>3 | GP<br>6         | 5<br>1<br>2<br>0<br>6 | Q9HC<br>N6 | glycopro<br>tein VI<br>platelet                  | Re<br>ce<br>pto<br>r                        | 89      | 0<br>.<br>5<br>9<br>7 | 0<br>.<br>6<br>1<br>5 | 1.<br>6<br>4<br>E<br>-<br>1<br>1 | 0.<br>03 |  | 0.<br>6<br>6<br>7 | 3 | 0 | 20<br>13 | 2<br>0<br>1<br>9 |
| Rh<br>eu<br>ma<br>toi<br>d<br>Ar<br>thr<br>itis | C<br>00<br>03<br>87<br>3 | TL<br>R8        | 5<br>1<br>3<br>1<br>1 | Q9NR<br>97 | toll<br>receptor 8                               | like                                        | 12<br>2 | 0<br>.<br>5<br>4<br>3 | 0<br>.<br>7<br>6<br>9 | 0.<br>3<br>2<br>4<br>0<br>1      | 0.<br>03 |  | 1                 | 3 | 0 | 20<br>08 | 2<br>0<br>1<br>9 |
| Rh<br>eu<br>ma<br>toi<br>d<br>Ar<br>thr<br>itis | C<br>00<br>03<br>87<br>3 | PD<br>E3<br>A   | 5<br>1<br>3<br>9      | Q144<br>32 | phosphodieste<br>rase 3A                         |                                             | 58      | 0<br>.<br>6<br>7      | 0<br>.<br>5<br>7<br>7 | 0.<br>0<br>0<br>1<br>9<br>3      | 0.<br>03 |  | 0.<br>6<br>6<br>7 | 3 | 0 | 20<br>13 | 2<br>0<br>1<br>6 |
| Rh<br>eu<br>ma<br>toi<br>d<br>Ar<br>thr<br>itis | C<br>00<br>03<br>87<br>3 | NC<br>KIP<br>SD | 5<br>1<br>5<br>1<br>7 | Q9NZ<br>Q3 | NCK<br>interacting<br>protein with<br>SH3 domain |                                             | 62      | 0<br>.<br>6<br>1<br>2 | 0<br>.<br>5<br>7<br>7 | 0.<br>0<br>0<br>2<br>2<br>3      | 0.<br>03 |  | 1                 | 3 | 0 | 20<br>00 | 2<br>0<br>0<br>6 |
| Rh<br>eu<br>ma<br>toi<br>d<br>Ar<br>thr<br>itis | C<br>00<br>03<br>87<br>3 | SIR<br>T6       | 5<br>1<br>5<br>4<br>8 | Q8N6<br>T7 | sirtuin 6                                        | Ep<br>ige<br>net<br>ic<br>reg<br>ula<br>tor | 19<br>5 | 0<br>.<br>4<br>9<br>6 | 0<br>.<br>8<br>4<br>6 | 0.<br>0<br>3<br>9<br>1<br>9      | 0.<br>03 |  | 1                 | 3 | 0 | 20<br>13 | 2<br>0<br>1<br>8 |



|                      |          |         |       |        |                                                            |                  |     |       |          |          |      |  |       |   |   |      |      |
|----------------------|----------|---------|-------|--------|------------------------------------------------------------|------------------|-----|-------|----------|----------|------|--|-------|---|---|------|------|
| Rheumatoid Arthritis | C0003873 | PADI3   | 51702 | Q9ULW8 | peptidyl arginine deiminase 3                              |                  | 21  | 0.78  | 0.12     | 2.36E-10 | 0.03 |  | 0.667 | 3 | 0 | 2007 | 2018 |
| Rheumatoid Arthritis | C0003873 | SERPIN1 | 5176  | P36955 | serpin family F member 1                                   | Enzyme modulator | 294 | 0.46  | 0.846    | 7.8E-08  | 0.03 |  | 1     | 3 | 0 | 2016 | 2018 |
| Rheumatoid Arthritis | C0003873 | PF4     | 5196  | P02776 | platelet factor 4                                          | Signaling        | 158 | 0.522 | 0.846    | 0.043062 | 0.03 |  | 1     | 3 | 0 | 2007 | 2019 |
| Rheumatoid Arthritis | C0003873 | PFKFB3  | 5209  | Q16875 | 6-phospho fructo-2-kinase/fructose-2,6-biphosphatase 3     | Kinase           | 104 | 0.561 | 0.808    | 0.024579 | 0.03 |  | 1     | 3 | 0 | 2013 | 2017 |
| Rheumatoid Arthritis | C0003873 | PIK3R2  | 5296  | O00459 | phosphoinositide -3-kinase regulatory subunit 2            | Enzyme modulator | 120 | 0.551 | 0.806823 | 0.01673  | 0.03 |  | 1     | 3 | 0 | 2016 | 2019 |
| Rheumatoid Arthritis | C0003873 | SLC1C1  | 5399  | Q9NYB5 | solute carrier organic anion transporter family member 1C1 | Transporter      | 20  | 0.751 | 0.423    | 3.99E-12 | 0.03 |  | 0.667 | 3 | 1 | 2013 | 2016 |
| Rheumatoid Ar        | C0003873 | ACP5    | 54    | P13686 | acid phosphatase 5, tartrate resistant                     |                  | 130 | 0.561 | 0.731    | 0.0786   | 0.03 |  | 1     | 3 | 0 | 2002 | 2017 |

|                                                 |                          |                     |                            |            |                                                  |                         |         |                       |                       |                                  |          |  |                   |   |   |          |                  |
|-------------------------------------------------|--------------------------|---------------------|----------------------------|------------|--------------------------------------------------|-------------------------|---------|-----------------------|-----------------------|----------------------------------|----------|--|-------------------|---|---|----------|------------------|
| thr<br>itis                                     |                          |                     |                            |            |                                                  |                         |         |                       |                       | 5<br>1                           |          |  |                   |   |   |          |                  |
| Rh<br>eu<br>ma<br>toi<br>d<br>Ar<br>thr<br>itis | C<br>00<br>03<br>87<br>3 | PPI<br>A            | 5<br>4<br>7<br>8           | P6293<br>7 | peptidylprolyl<br>isomerase A                    |                         | 18<br>0 | 0<br>.<br>5<br>1      | 0<br>.<br>7<br>6<br>9 | 0.<br>5<br>5<br>7<br>3<br>4      | 0.<br>03 |  | 1                 | 3 | 0 | 20<br>08 | 2<br>0<br>1<br>1 |
| Rh<br>eu<br>ma<br>toi<br>d<br>Ar<br>thr<br>itis | C<br>00<br>03<br>87<br>3 | AS<br>PN            | 5<br>4<br>8<br>2<br>9      | Q9BX<br>N1 | asporin                                          |                         | 51      | 0<br>.<br>6<br>3<br>6 | 0<br>.<br>5           | 1.<br>0<br>4<br>E<br>-<br>0<br>7 | 0.<br>03 |  | 0.<br>6<br>6<br>7 | 3 | 0 | 20<br>07 | 2<br>0<br>1<br>8 |
| Rh<br>eu<br>ma<br>toi<br>d<br>Ar<br>thr<br>itis | C<br>00<br>03<br>87<br>3 | SL<br>C5<br>2A<br>1 | 5<br>5<br>0<br>6<br>5      | Q9N<br>WF4 | solute<br>carrier<br>family<br>52<br>member<br>1 | Tr<br>ans<br>por<br>ter | 16<br>0 | 0<br>.<br>5<br>2<br>6 | 0<br>.<br>7<br>6<br>9 | 3.<br>5<br>2<br>E<br>-<br>0<br>6 | 0.<br>03 |  | 1                 | 3 | 0 | 20<br>07 | 2<br>0<br>1<br>2 |
| Rh<br>eu<br>ma<br>toi<br>d<br>Ar<br>thr<br>itis | C<br>00<br>03<br>87<br>3 | AD<br>I1            | 5<br>5<br>2<br>5<br>6      | Q9BV<br>57 | acireduc<br>tone<br>dioxyge<br>nase 1            | En<br>zy<br>me          | 36      | 0<br>.<br>6<br>7<br>4 | 0<br>.<br>6<br>5<br>4 | 3.<br>1<br>5<br>E<br>-<br>0<br>5 | 0.<br>03 |  | 1                 | 3 | 0 | 20<br>13 | 2<br>0<br>1<br>7 |
| Rh<br>eu<br>ma<br>toi<br>d<br>Ar<br>thr<br>itis | C<br>00<br>03<br>87<br>3 | ME<br>G3            | 5<br>5<br>3<br>8<br>4      |            | maternally<br>expressed 3                        |                         | 23<br>9 | 0<br>.<br>4<br>7<br>1 | 0<br>.<br>8<br>4<br>6 |                                  | 0.<br>03 |  | 1                 | 3 | 0 | 20<br>19 | 2<br>0<br>1<br>9 |
| Rh<br>eu<br>ma<br>toi<br>d<br>Ar<br>thr<br>itis | C<br>00<br>03<br>87<br>3 | H4<br>C1<br>5       | 5<br>5<br>4<br>3<br>1<br>3 | P6280<br>5 | H4 clustered<br>histone 15                       |                         | 12<br>1 | 0<br>.<br>5<br>4<br>1 | 0<br>.<br>6<br>9<br>2 |                                  | 0.<br>03 |  | 1                 | 3 | 0 | 20<br>18 | 2<br>0<br>1<br>9 |
| Rh<br>eu<br>ma<br>toi                           | C<br>00<br>03            | PR<br>KC<br>B       | 5<br>5<br>7<br>9           | P0577<br>1 | protein<br>kinase C<br>beta                      | Ki<br>nas<br>e          | 31<br>7 | 0<br>.<br>4           | 0<br>.<br>8           | 1                                | 0.<br>03 |  | 1                 | 3 | 0 | 20<br>06 | 2<br>0<br>1<br>2 |

|                                                 |                          |                |                  |            |                                                                                      |                                         |         |                       |                            |                                  |          |  |   |   |   |          |                  |
|-------------------------------------------------|--------------------------|----------------|------------------|------------|--------------------------------------------------------------------------------------|-----------------------------------------|---------|-----------------------|----------------------------|----------------------------------|----------|--|---|---|---|----------|------------------|
| d<br>Ar<br>thr<br>itis                          | 87<br>3                  |                |                  |            |                                                                                      |                                         |         | 5<br>3                | 8<br>5                     |                                  |          |  |   |   |   |          |                  |
| Rh<br>eu<br>ma<br>toi<br>d<br>Ar<br>thr<br>itis | C<br>00<br>03<br>87<br>3 | PR<br>OC       | 5<br>6<br>2<br>4 | P0407<br>0 | protein<br>C,<br>inactivat<br>or of<br>coagulat<br>ion<br>factors<br>Va and<br>VIIIa | En<br>zy<br>me                          | 20<br>0 | 0<br>.<br>5<br>0<br>4 | 0<br>.<br>8<br>0<br>8      | 1.<br>9<br>1<br>E<br>-<br>0<br>5 | 0.<br>03 |  | 1 | 3 | 0 | 20<br>04 | 2<br>0<br>1<br>9 |
| Rh<br>eu<br>ma<br>toi<br>d<br>Ar<br>thr<br>itis | C<br>00<br>03<br>87<br>3 | HT<br>RA<br>1  | 5<br>6<br>5<br>4 | Q927<br>43 | HtrA<br>serine<br>peptidas<br>e 1                                                    | En<br>zy<br>me                          | 16<br>4 | 0<br>.<br>5<br>3<br>2 | 0<br>.<br>6<br>9<br>0<br>2 | 0.<br>0<br>0<br>4<br>9<br>2      | 0.<br>03 |  | 1 | 3 | 0 | 20<br>13 | 2<br>0<br>1<br>8 |
| Rh<br>eu<br>ma<br>toi<br>d<br>Ar<br>thr<br>itis | C<br>00<br>03<br>87<br>3 | PS<br>MD<br>12 | 5<br>7<br>1<br>8 | O002<br>32 | proteaso<br>me 26S<br>subunit,<br>non-<br>ATPase<br>12                               | En<br>zy<br>me<br>mo<br>dul<br>ato<br>r | 10<br>5 | 0<br>.<br>5<br>7<br>8 | 0<br>.<br>8<br>0<br>8      | 0.<br>9<br>9<br>8<br>4           | 0.<br>03 |  | 1 | 3 | 0 | 19<br>92 | 2<br>0<br>0<br>2 |
| Rh<br>eu<br>ma<br>toi<br>d<br>Ar<br>thr<br>itis | C<br>00<br>03<br>87<br>3 | PT<br>CH<br>1  | 5<br>7<br>2<br>7 | Q136<br>35 | patched 1                                                                            |                                         | 60<br>4 | 0<br>.<br>3<br>9<br>8 | 0<br>.<br>8<br>8<br>5      | 1                                | 0.<br>03 |  | 1 | 3 | 0 | 20<br>14 | 2<br>0<br>1<br>8 |
| Rh<br>eu<br>ma<br>toi<br>d<br>Ar<br>thr<br>itis | C<br>00<br>03<br>87<br>3 | PT<br>HL<br>H  | 5<br>7<br>4<br>4 | P1227<br>2 | parathyroid<br>hormone like<br>hormone                                               |                                         | 32<br>1 | 0<br>.<br>4<br>5<br>3 | 0<br>.<br>8<br>4<br>6      | 0.<br>8<br>1<br>1<br>4<br>6      | 0.<br>03 |  | 1 | 3 | 0 | 19<br>98 | 2<br>0<br>1<br>5 |
| Rh<br>eu<br>ma<br>toi<br>d<br>Ar<br>thr<br>itis | C<br>00<br>03<br>87<br>3 | SE<br>MA<br>6A | 5<br>7<br>5<br>6 | Q9H2<br>E6 | semapho<br>rin 6A                                                                    | Sig<br>nal<br>ing                       | 21<br>1 | 0<br>.<br>4<br>8<br>6 | 0<br>.<br>8<br>0<br>8      | 0.<br>9<br>9<br>7<br>6           | 0.<br>03 |  | 1 | 3 | 0 | 20<br>17 | 2<br>0<br>1<br>9 |

|                      |          |         |       |        |                                     |                            |     |       |       |          |      |  |   |   |   |      |      |
|----------------------|----------|---------|-------|--------|-------------------------------------|----------------------------|-----|-------|-------|----------|------|--|---|---|---|------|------|
| Rheumatoid Arthritis | C0003873 | SIGIRR  | 59307 | Q6IA17 | single Ig and TIR domain containing | Receptor                   | 36  | 0.67  | 0.615 | 5.93E-06 | 0.03 |  | 1 | 3 | 0 | 2010 | 2020 |
| Rheumatoid Arthritis | C0003873 | HRH4    | 59340 | Q9H3N8 | histamine receptor H4               | G-protein coupled receptor | 48  | 0.659 | 0.462 | 5.22E-08 | 0.03 |  | 1 | 3 | 0 | 2005 | 2017 |
| Rheumatoid Arthritis | C0003873 | RHO     | 6010  | P08100 | rhodopsin                           | G-protein coupled receptor | 178 | 0.525 | 0.769 | 0.00131  | 0.03 |  | 1 | 3 | 0 | 1999 | 2019 |
| Rheumatoid Arthritis | C0003873 | BCR     | 613   | P11274 | BCR activator of RhoGEF and GTPase  | Enzyme modulator           | 392 | 0.431 | 0.885 | 0.98761  | 0.03 |  | 1 | 3 | 0 | 2017 | 2020 |
| Rheumatoid Arthritis | C0003873 | RPS6KA3 | 6197  | P51812 | ribosomal protein S6 kinase A3      | Kinase                     | 315 | 0.491 | 0.846 | 0.9999   | 0.03 |  | 1 | 3 | 0 | 2015 | 2019 |
| Rheumatoid Arthritis | C0003873 | BGLAP   | 632   | P02818 | bone gamma-carboxyglutamate protein |                            | 274 | 0.462 | 0.846 | 4.62E-08 | 0.03 |  | 1 | 3 | 0 | 2007 | 2019 |

|                      |          |           |        |        |                                                    |                         |     |       |       |          |      |  |       |   |   |      |      |
|----------------------|----------|-----------|--------|--------|----------------------------------------------------|-------------------------|-----|-------|-------|----------|------|--|-------|---|---|------|------|
| Rheumatoid Arthritis | C0003873 | CC L13    | 6357   | Q99616 | C-C motif chemokine ligand 13                      | Signaling               | 50  | 0.628 | 0.62  | 0.04987  | 0.03 |  | 1     | 3 | 0 | 2006 | 2010 |
| Rheumatoid Arthritis | C0003873 | CC L18    | 6362   | P55774 | C-C motif chemokine ligand 18                      | Signaling               | 200 | 0.489 | 0.846 | 0.09174  | 0.03 |  | 1     | 3 | 0 | 2007 | 2015 |
| Rheumatoid Arthritis | C0003873 | CX CL11   | 6373   | O14625 | C-X-C motif chemokine ligand 11                    | Signaling               | 164 | 0.519 | 0.808 | 0.31408  | 0.03 |  | 1     | 3 | 0 | 2005 | 2018 |
| Rheumatoid Arthritis | C0003873 | SD C1     | 6382   | P18827 | syndecan 1                                         | Extracellular structure | 323 | 0.445 | 0.769 | 0.08412  | 0.03 |  | 1     | 3 | 0 | 2001 | 2019 |
| Rheumatoid Arthritis | C0003873 | IFI H1    | 64135  | Q9BYX4 | interferon induced with helicase domain 1          |                         | 319 | 0.471 | 0.808 | 6.98E-44 | 0.03 |  | 0.333 | 3 | 1 | 2007 | 2013 |
| Rheumatoid Arthritis | C0003873 | PO TEM    | 641455 | A6NI47 | POTE ankyrin domain family member M                |                         | 133 | 0.541 | 0.769 | 0.030316 | 0.03 |  | 1     | 3 | 0 | 2017 | 2019 |
| Rheumatoid Ar        | C0003873 | ST 6G AL1 | 6480   | P15907 | ST6 beta-galactoside alpha-2,6-sialyltransferase 1 |                         | 101 | 0.569 | 0.731 | 0.2341   | 0.03 |  | 1     | 3 | 0 | 2018 | 2019 |

|                      |          |          |       |        |                                                                  |                      |     |      |      |          |      |  |   |   |   |      |      |
|----------------------|----------|----------|-------|--------|------------------------------------------------------------------|----------------------|-----|------|------|----------|------|--|---|---|---|------|------|
| thritis              |          |          |       |        |                                                                  |                      |     |      |      |          |      |  |   |   |   |      |      |
| Rheumatoid Arthritis | C0003873 | BM P2    | 650   | P12643 | bone morphogenetic protein 2                                     | Signaling            | 428 | 0432 | 0846 | 0.9879   | 0.03 |  | 1 | 3 | 0 | 2003 | 2019 |
| Rheumatoid Arthritis | C0003873 | RA PH1   | 65059 | Q70E73 | Ras association (RalGDS/AF-6) and pleckstrin homolog y domains 1 | Receptor             | 80  | 0593 | 0654 | 0.9985   | 0.03 |  | 1 | 3 | 0 | 2007 | 2017 |
| Rheumatoid Arthritis | C0003873 | SL C22A1 | 6580  | O15245 | solute carrier family 22 member 1                                | Transporter          | 119 | 056  | 0731 | 1.46E-22 | 0.03 |  | 1 | 3 | 0 | 1998 | 2017 |
| Rheumatoid Arthritis | C0003873 | SL PI    | 6590  | P03973 | secretory leukocyte peptidase inhibitor                          | Enzyme modulator     | 310 | 049  | 0846 | 0.00897  | 0.03 |  | 1 | 3 | 0 | 2003 | 2019 |
| Rheumatoid Arthritis | C0003873 | SS T     | 6750  | P61278 | somatostatin                                                     | Signaling            | 535 | 0399 | 0885 | 0.34128  | 0.03 |  | 1 | 3 | 0 | 1997 | 2018 |
| Rheumatoid Arthritis | C0003873 | ST AT5B  | 6777  | P51692 | signal transducer and activator of transcription 5B              | Nucleic acid binding | 357 | 042  | 0888 | 0.9988   | 0.03 |  | 1 | 3 | 0 | 2000 | 2019 |

|                      |          |        |      |         |                                                                 |                            |     |       |       |          |      |  |       |   |   |      |      |
|----------------------|----------|--------|------|---------|-----------------------------------------------------------------|----------------------------|-----|-------|-------|----------|------|--|-------|---|---|------|------|
| Rheumatoid Arthritis | C0003873 | SULTA1 | 6822 | Q06520  | sulfotransferase family 2A member 1                             |                            | 126 | 0.545 | 0.769 | 1.25E-15 | 0.03 |  | 1     | 3 | 0 | 1999 | 2018 |
| Rheumatoid Arthritis | C0003873 | ABCC8  | 6833 | Q09428  | ATP binding cassette subfamily C member 8                       | Transporter                | 317 | 0.474 | 0.846 | 7.96E-24 | 0.03 |  | 1     | 3 | 0 | 2005 | 2019 |
| Rheumatoid Arthritis | C0003873 | TACR1  | 6869 | P25103  | tachykinin receptor 1                                           | G-protein coupled receptor | 217 | 0.502 | 0.805 | 0.00384  | 0.03 |  | 1     | 3 | 0 | 1998 | 2019 |
| Rheumatoid Arthritis | C0003873 | TRA    | 6955 | P0DS E1 | T cell receptor alpha locus                                     |                            | 51  | 0.628 | 0.577 |          | 0.03 |  | 0.667 | 3 | 0 | 1997 | 2019 |
| Rheumatoid Arthritis | C0003873 | TF F3  | 7033 | Q07654  | trefoil factor 3                                                | Signaling                  | 163 | 0.518 | 0.859 | 0.001    | 0.03 |  | 1     | 3 | 0 | 2017 | 2019 |
| Rheumatoid Arthritis | C0003873 | TIE1   | 7075 | P35590  | tyrosine kinase with immunoglobulin like and EGF like domains 1 | Kinase                     | 66  | 0.61  | 0.654 | 1.24E-19 | 0.03 |  | 1     | 3 | 0 | 2002 | 2011 |
| Rheumatoid Arthritis | C0003873 | TIMP2  | 70   | P16035  | TIMP metallopeptidase                                           | Enzyme                     | 404 | 0.4   | 0.88  | 0.78     | 0.03 |  | 1     | 3 | 0 | 1998 | 20   |

|                                                 |                          |                |                            |            |                                                |                                         |         |                       |                       |                                  |          |  |   |   |   |          |                  |
|-------------------------------------------------|--------------------------|----------------|----------------------------|------------|------------------------------------------------|-----------------------------------------|---------|-----------------------|-----------------------|----------------------------------|----------|--|---|---|---|----------|------------------|
| to<br>id<br>Ar<br>thr<br>itis                   | 87<br>3                  |                | 7<br>7                     |            | inhibitor<br>2                                 | mo<br>dul<br>ato<br>r                   |         | 2<br>5                | 4<br>6                | 8<br>9<br>3                      |          |  |   |   |   |          | 0<br>9           |
| Rh<br>eu<br>ma<br>toi<br>d<br>Ar<br>thr<br>itis | C<br>00<br>03<br>87<br>3 | TI<br>MP<br>3  | 7<br>0<br>7<br>8           | P3562<br>5 | TIMP<br>metallo<br>ptidase<br>inhibitor<br>3   | En<br>zy<br>me<br>mo<br>dul<br>ato<br>r | 32<br>5 | 0<br>.<br>4<br>4<br>5 | 0<br>.<br>9<br>2<br>3 | 0.<br>6<br>3<br>3<br>7           | 0.<br>03 |  | 1 | 3 | 0 | 20<br>03 | 2<br>0<br>1<br>7 |
| Rh<br>eu<br>ma<br>toi<br>d<br>Ar<br>thr<br>itis | C<br>00<br>03<br>87<br>3 | AC<br>TG<br>1  | 7<br>1                     | P6326<br>1 | actin<br>gamma<br>1                            | Ce<br>llul<br>ar<br>str<br>uct<br>ure   | 29<br>1 | 0<br>.<br>4<br>7<br>7 | 0<br>.<br>8<br>4<br>6 | 0.<br>0<br>4<br>7<br>8<br>4      | 0.<br>03 |  | 1 | 3 | 0 | 20<br>17 | 2<br>0<br>1<br>9 |
| Rh<br>eu<br>ma<br>toi<br>d<br>Ar<br>thr<br>itis | C<br>00<br>03<br>87<br>3 | TPI<br>1       | 7<br>1<br>6<br>7           | P6017<br>4 | trioseph<br>osphate<br>isomeras<br>e 1         | En<br>zy<br>me                          | 18<br>4 | 0<br>.<br>5<br>1<br>7 | 0<br>.<br>8<br>4<br>6 | 0.<br>0<br>3<br>1<br>9<br>3      | 0.<br>03 |  | 1 | 3 | 0 | 20<br>04 | 2<br>0<br>1<br>9 |
| Rh<br>eu<br>ma<br>toi<br>d<br>Ar<br>thr<br>itis | C<br>00<br>03<br>87<br>3 | CR<br>ISP<br>2 | 7<br>1<br>8<br>0           | P1656<br>2 | cysteine<br>rich<br>secretor<br>y protein<br>2 | Im<br>mu<br>ne<br>res<br>po<br>nse      | 16<br>8 | 0<br>.<br>5<br>1<br>2 | 0<br>.<br>7<br>6<br>9 | 1.<br>4<br>4<br>E<br>-<br>1<br>2 | 0.<br>03 |  | 1 | 3 | 0 | 20<br>06 | 2<br>0<br>1<br>7 |
| Rh<br>eu<br>ma<br>toi<br>d<br>Ar<br>thr<br>itis | C<br>00<br>03<br>87<br>3 | AC<br>TG<br>2  | 7<br>2                     | P6326<br>7 | actin<br>gamma<br>2,<br>smooth<br>muscle       | Ce<br>llul<br>ar<br>str<br>uct<br>ure   | 20<br>5 | 0<br>.<br>5<br>0<br>5 | 0<br>.<br>8<br>0<br>8 | 0.<br>0<br>7<br>1<br>0<br>3<br>6 | 0.<br>03 |  | 1 | 3 | 0 | 20<br>17 | 2<br>0<br>1<br>9 |
| Rh<br>eu<br>ma<br>toi<br>d<br>Ar<br>thr<br>itis | C<br>00<br>03<br>87<br>3 | MU<br>C5<br>B  | 7<br>2<br>7<br>8<br>9<br>7 | Q9HC<br>84 | mucin<br>oligomeric<br>mucus/gel-<br>forming   | 5B,                                     | 14<br>1 | 0<br>.<br>5<br>3<br>2 | 0<br>.<br>8<br>0<br>8 | 0.<br>9<br>9<br>9<br>9           | 0.<br>03 |  | 1 | 3 | 0 | 20<br>18 | 2<br>0<br>1<br>9 |



|                      |          |        |       |        |                                                       |                      |     |       |       |          |      |  |       |   |   |      |      |
|----------------------|----------|--------|-------|--------|-------------------------------------------------------|----------------------|-----|-------|-------|----------|------|--|-------|---|---|------|------|
| Rheumatoid Arthritis | C0003873 | TNFSF4 | 7292  | P23510 | TNF superfamily member 4                              | Signaling            | 129 | 0.54  | 0.808 | 0.049378 | 0.03 |  | 1     | 3 | 4 | 2015 | 2019 |
| Rheumatoid Arthritis | C0003873 | TXNRD1 | 7296  | Q16881 | thioredoxin reductase 1                               | Enzyme               | 136 | 0.529 | 0.692 | 1.61E-06 | 0.03 |  | 0.667 | 3 | 0 | 2008 | 2019 |
| Rheumatoid Arthritis | C0003873 | VILL1  | 7429  | P09327 | villin 1                                              | Cellular structure   | 32  | 0.691 | 0.423 | 2.64E-14 | 0.03 |  | 1     | 3 | 0 | 1996 | 1997 |
| Rheumatoid Arthritis | C0003873 | VTN    | 7448  | P04004 | vitronectin                                           |                      | 178 | 0.509 | 0.769 | 1.5E-10  | 0.03 |  | 1     | 3 | 0 | 1999 | 2014 |
| Rheumatoid Arthritis | C0003873 | YY1    | 7528  | P25490 | YY1 transcription factor                              | Transcription factor | 245 | 0.481 | 0.808 | 0.938    | 0.03 |  | 1     | 3 | 0 | 1990 | 2019 |
| Rheumatoid Arthritis | C0003873 | VTGN1  | 79679 | Q7Z7D3 | V-set domain containing T cell activation inhibitor 1 | Enzyme modulator     | 139 | 0.529 | 0.692 | 1.37E-12 | 0.03 |  | 1     | 3 | 0 | 2012 | 2017 |
| Rheumatoid Ar        | C0003873 | SCD5   | 79966 | Q86SK9 | stearoyl-CoA desaturase 5                             |                      | 40  | 0.682 | 0.654 | 0.0104   | 0.03 |  | 1     | 3 | 0 | 2002 | 2014 |

|                                                 |                          |                      |                       |            |                                                                                  |                         |         |                       |                       |                                  |          |  |                   |   |   |          |                  |
|-------------------------------------------------|--------------------------|----------------------|-----------------------|------------|----------------------------------------------------------------------------------|-------------------------|---------|-----------------------|-----------------------|----------------------------------|----------|--|-------------------|---|---|----------|------------------|
| thr<br>itis                                     |                          |                      |                       |            |                                                                                  |                         |         |                       |                       |                                  |          |  |                   |   |   |          |                  |
| Rh<br>eu<br>ma<br>toi<br>d<br>Ar<br>thr<br>itis | C<br>00<br>03<br>87<br>3 | PD<br>CD<br>1L<br>G2 | 8<br>0<br>3<br>8<br>0 | Q9BQ<br>51 | programmed<br>cell death 1<br>ligand 2                                           |                         | 19<br>1 | 0<br>.<br>4<br>9<br>6 | 0<br>.<br>7<br>6<br>9 | 1.<br>2<br>E<br>-<br>0<br>5      | 0.<br>03 |  | 0.<br>6<br>6<br>7 | 3 | 0 | 20<br>07 | 2<br>0<br>1<br>8 |
| Rh<br>eu<br>ma<br>toi<br>d<br>Ar<br>thr<br>itis | C<br>00<br>03<br>87<br>3 | SL<br>C7<br>A5       | 8<br>1<br>4<br>0      | Q016<br>50 | solute<br>carrier<br>family 7<br>member<br>5                                     | Tr<br>ans<br>por<br>ter | 17<br>3 | 0<br>.<br>5<br>1<br>3 | 0<br>.<br>8<br>0<br>8 | 0.<br>2<br>3<br>5<br>0<br>5      | 0.<br>03 |  | 1                 | 3 | 0 | 20<br>18 | 2<br>0<br>1<br>8 |
| Rh<br>eu<br>ma<br>toi<br>d<br>Ar<br>thr<br>itis | C<br>00<br>03<br>87<br>3 | AD<br>AM<br>TS<br>12 | 8<br>1<br>7<br>9<br>2 | P5839<br>7 | ADAM<br>metallo<br>peptidase<br>with<br>thrombo<br>spondin<br>type 1<br>motif 12 | En<br>zy<br>me          | 26      | 0<br>.<br>7           | 0<br>.<br>4<br>6<br>2 | 2.<br>4<br>8<br>E<br>-<br>1<br>7 | 0.<br>03 |  | 1                 | 3 | 3 | 20<br>12 | 2<br>0<br>1<br>8 |
| Rh<br>eu<br>ma<br>toi<br>d<br>Ar<br>thr<br>itis | C<br>00<br>03<br>87<br>3 | TL<br>R1<br>0        | 8<br>1<br>7<br>9<br>3 | Q9BX<br>R5 | toll like<br>receptor 10                                                         |                         | 71      | 0<br>.<br>5<br>9<br>2 | 0<br>.<br>6<br>5<br>4 | 3.<br>4<br>8<br>E<br>-<br>0<br>9 | 0.<br>03 |  | 1                 | 3 | 1 | 20<br>16 | 2<br>0<br>1<br>9 |
| Rh<br>eu<br>ma<br>toi<br>d<br>Ar<br>thr<br>itis | C<br>00<br>03<br>87<br>3 | CA<br>MP             | 8<br>2<br>0           | P4991<br>3 | cathelicidin<br>antimicrobial<br>peptide                                         |                         | 26<br>2 | 0<br>.<br>4<br>6<br>6 | 0<br>.<br>8<br>4<br>6 | 0.<br>0<br>4<br>3<br>9           | 0.<br>03 |  | 1                 | 3 | 0 | 20<br>19 | 2<br>0<br>1<br>9 |
| Rh<br>eu<br>ma<br>toi<br>d<br>Ar<br>thr<br>itis | C<br>00<br>03<br>87<br>3 | H4<br>C9             | 8<br>2<br>9<br>4      | P6280<br>5 | H4 clustered<br>histone 9                                                        |                         | 12<br>1 | 0<br>.<br>5<br>4<br>1 | 0<br>.<br>6<br>9<br>2 | 0.<br>0<br>1<br>5<br>8<br>0<br>9 | 0.<br>03 |  | 1                 | 3 | 0 | 20<br>18 | 2<br>0<br>1<br>9 |
| Rh<br>eu<br>ma<br>toi                           | C<br>00<br>03            | H4<br>C1             | 8<br>3<br>5<br>9      | P6280<br>5 | H4 clustered<br>histone 1                                                        |                         | 12<br>1 | 0<br>.<br>5           | 0<br>.<br>6           | 0.<br>0<br>0<br>0                | 0.<br>03 |  | 1                 | 3 | 0 | 20<br>18 | 2<br>0<br>1<br>9 |

|                                                 |                          |               |                  |            |                            |         |                       |                       |                                  |          |  |   |   |   |          |                  |
|-------------------------------------------------|--------------------------|---------------|------------------|------------|----------------------------|---------|-----------------------|-----------------------|----------------------------------|----------|--|---|---|---|----------|------------------|
| d<br>Ar<br>thr<br>itis                          | 87<br>3                  |               |                  |            |                            |         | 4<br>1                | 9<br>2                | 2<br>0<br>6                      |          |  |   |   |   |          |                  |
| Rh<br>eu<br>ma<br>toi<br>d<br>Ar<br>thr<br>itis | C<br>00<br>03<br>87<br>3 | H4<br>C4      | 8<br>3<br>6<br>0 | P6280<br>5 | H4 clustered<br>histone 4  | 12<br>5 | 0<br>.<br>5<br>3<br>7 | 0<br>.<br>6<br>9<br>2 | 0.<br>0<br>1<br>9<br>8<br>5      | 0.<br>03 |  | 1 | 3 | 0 | 20<br>18 | 2<br>0<br>1<br>9 |
| Rh<br>eu<br>ma<br>toi<br>d<br>Ar<br>thr<br>itis | C<br>00<br>03<br>87<br>3 | H4<br>C6      | 8<br>3<br>6<br>1 | P6280<br>5 | H4 clustered<br>histone 6  | 12<br>1 | 0<br>.<br>5<br>4<br>1 | 0<br>.<br>6<br>9<br>2 | 0.<br>1<br>3<br>0<br>7<br>2      | 0.<br>03 |  | 1 | 3 | 0 | 20<br>18 | 2<br>0<br>1<br>9 |
| Rh<br>eu<br>ma<br>toi<br>d<br>Ar<br>thr<br>itis | C<br>00<br>03<br>87<br>3 | H4<br>C1<br>2 | 8<br>3<br>6<br>2 | P6280<br>5 | H4 clustered<br>histone 12 | 12<br>1 | 0<br>.<br>5<br>4<br>1 | 0<br>.<br>6<br>9<br>2 | 0.<br>0<br>0<br>1<br>5<br>7<br>4 | 0.<br>03 |  | 1 | 3 | 0 | 20<br>18 | 2<br>0<br>1<br>9 |
| Rh<br>eu<br>ma<br>toi<br>d<br>Ar<br>thr<br>itis | C<br>00<br>03<br>87<br>3 | H4<br>C1<br>1 | 8<br>3<br>6<br>3 | P6280<br>5 | H4 clustered<br>histone 11 | 12<br>1 | 0<br>.<br>5<br>4<br>1 | 0<br>.<br>6<br>9<br>2 | 0.<br>3<br>8<br>6<br>8<br>3      | 0.<br>03 |  | 1 | 3 | 0 | 20<br>18 | 2<br>0<br>1<br>9 |
| Rh<br>eu<br>ma<br>toi<br>d<br>Ar<br>thr<br>itis | C<br>00<br>03<br>87<br>3 | H4<br>C3      | 8<br>3<br>6<br>4 | P6280<br>5 | H4 clustered<br>histone 3  | 13<br>2 | 0<br>.<br>5<br>3<br>4 | 0<br>.<br>7<br>3<br>1 | 0.<br>0<br>0<br>3<br>6           | 0.<br>03 |  | 1 | 3 | 0 | 20<br>18 | 2<br>0<br>1<br>9 |
| Rh<br>eu<br>ma<br>toi<br>d<br>Ar<br>thr<br>itis | C<br>00<br>03<br>87<br>3 | H4<br>C8      | 8<br>3<br>6<br>5 | P6280<br>5 | H4 clustered<br>histone 8  | 12<br>2 | 0<br>.<br>5<br>4<br>1 | 0<br>.<br>6<br>9<br>2 | 7.<br>1<br>5<br>E<br>-<br>0<br>6 | 0.<br>03 |  | 1 | 3 | 0 | 20<br>18 | 2<br>0<br>1<br>9 |
| Rh<br>eu                                        | C<br>00                  | H4<br>C2      | 8<br>3           | P6280<br>5 | H4 clustered<br>histone 2  | 12<br>8 | 0<br>.                | 0<br>.                | 0.<br>0                          | 0.<br>03 |  | 1 | 3 | 0 | 20<br>18 | 2<br>0           |

|                                                 |                          |               |                       |            |                                                |         |                       |                       |                                  |          |  |   |   |   |          |                  |
|-------------------------------------------------|--------------------------|---------------|-----------------------|------------|------------------------------------------------|---------|-----------------------|-----------------------|----------------------------------|----------|--|---|---|---|----------|------------------|
| ma<br>toi<br>d<br>Ar<br>thr<br>itis             | 03<br>87<br>3            |               | 6<br>6                |            |                                                |         | 5<br>3<br>7           | 7<br>3<br>1           | 0<br>2<br>9<br>1<br>5            |          |  |   |   |   |          | 1<br>9           |
| Rh<br>eu<br>ma<br>toi<br>d<br>Ar<br>thr<br>itis | C<br>00<br>03<br>87<br>3 | H4<br>C5      | 8<br>3<br>6<br>7      | P6280<br>5 | H4 clustered<br>histone 5                      | 12<br>1 | 0<br>.<br>5<br>4<br>1 | 0<br>.<br>6<br>9<br>2 | 0.<br>0<br>1<br>3<br>4<br>5<br>3 | 0.<br>03 |  | 1 | 3 | 0 | 20<br>18 | 2<br>0<br>1<br>9 |
| Rh<br>eu<br>ma<br>toi<br>d<br>Ar<br>thr<br>itis | C<br>00<br>03<br>87<br>3 | H4<br>C1<br>3 | 8<br>3<br>6<br>8      | P6280<br>5 | H4 clustered<br>histone 13                     | 12<br>1 | 0<br>.<br>5<br>4<br>1 | 0<br>.<br>6<br>9<br>2 | 0.<br>0<br>0<br>0<br>3<br>5      | 0.<br>03 |  | 1 | 3 | 0 | 20<br>18 | 2<br>0<br>1<br>9 |
| Rh<br>eu<br>ma<br>toi<br>d<br>Ar<br>thr<br>itis | C<br>00<br>03<br>87<br>3 | H4<br>C1<br>4 | 8<br>3<br>7<br>0      | P6280<br>5 | H4 clustered<br>histone 14                     | 12<br>1 | 0<br>.<br>5<br>4<br>1 | 0<br>.<br>6<br>9<br>2 |                                  | 0.<br>03 |  | 1 | 3 | 0 | 20<br>18 | 2<br>0<br>1<br>9 |
| Rh<br>eu<br>ma<br>toi<br>d<br>Ar<br>thr<br>itis | C<br>00<br>03<br>87<br>3 | PR<br>AM<br>1 | 8<br>4<br>1<br>0<br>6 | Q96Q<br>H2 | PML-RARA<br>regulated<br>adaptor<br>molecule 1 | 27      | 0<br>.<br>7           | 0<br>.<br>4<br>6<br>2 | 0.<br>0<br>0<br>0<br>3           | 0.<br>03 |  | 1 | 3 | 0 | 19<br>95 | 2<br>0<br>0<br>5 |
| Rh<br>eu<br>ma<br>toi<br>d<br>Ar<br>thr<br>itis | C<br>00<br>03<br>87<br>3 | SP<br>Z1      | 8<br>4<br>6<br>5<br>4 | Q9BX<br>G8 | spermatogenic<br>leucine zipper<br>1           | 17<br>3 | 0<br>.<br>5<br>0<br>7 | 0<br>.<br>7<br>6<br>9 |                                  | 0.<br>03 |  | 1 | 3 | 0 | 20<br>06 | 2<br>0<br>1<br>7 |
| Rh<br>eu<br>ma<br>toi<br>d<br>Ar<br>thr<br>itis | C<br>00<br>03<br>87<br>3 | FC<br>RL<br>A | 8<br>4<br>8<br>2<br>4 | Q7L5<br>13 | Fc<br>receptor<br>like A                       | 15      | 0<br>.<br>8<br>0<br>5 | 0<br>.<br>3<br>4<br>6 | 2.<br>4<br>4<br>E<br>-<br>0<br>9 | 0.<br>03 |  | 1 | 3 | 0 | 20<br>03 | 2<br>0<br>1<br>7 |

|                      |          |        |       |        |                                                    |                  |     |       |       |          |      |  |   |   |   |      |      |
|----------------------|----------|--------|-------|--------|----------------------------------------------------|------------------|-----|-------|-------|----------|------|--|---|---|---|------|------|
| Rheumatoid Arthritis | C0003873 | ORA1   | 84876 | Q96D31 | ORAI calcium release-activated calcium modulator 1 | Ion channel      | 195 | 0.52  | 0.88  | 1.91E-05 | 0.03 |  | 1 | 3 | 1 | 2014 | 2019 |
| Rheumatoid Arthritis | C0003873 | PIK3R3 | 8503  | Q92569 | phosphoinositide 3-kinase regulatory subunit 3     | Enzyme modulator | 101 | 0.556 | 0.692 | 3.36E-10 | 0.03 |  | 1 | 3 | 0 | 1992 | 2002 |
| Rheumatoid Arthritis | C0003873 | ABCC11 | 85320 | Q96J66 | ATP binding cassette subfamily C member 11         | Transporter      | 91  | 0.565 | 0.769 | 3.99E-46 | 0.03 |  | 1 | 3 | 0 | 2005 | 2019 |
| Rheumatoid Arthritis | C0003873 | BECN1  | 8678  | Q14457 | beclin 1                                           | Enzyme modulator | 373 | 0.432 | 0.846 | 0.9377   | 0.03 |  | 1 | 3 | 0 | 2013 | 2019 |
| Rheumatoid Arthritis | C0003873 | FADD   | 8772  | Q13158 | Fas associated via death domain                    |                  | 137 | 0.537 | 0.846 | 0.5295   | 0.03 |  | 1 | 3 | 0 | 2000 | 2006 |
| Rheumatoid Arthritis | C0003873 | CD84   | 8832  | Q9UIB8 | CD84 molecule                                      |                  | 22  | 0.76  | 0.308 | 6.91E-09 | 0.03 |  | 1 | 3 | 0 | 2013 | 2019 |
| Rheumatoid Ar        | C0003873 | HDAC3  | 8841  | O15379 | histone deacetylase 3                              | Epigenetic reg   | 179 | 0.511 | 0.731 | 0.56737  | 0.03 |  | 1 | 3 | 0 | 2012 | 2018 |

|                      |          |        |      |        |                                                   |                            |     |       |       |         |      |  |   |   |   |      |      |
|----------------------|----------|--------|------|--------|---------------------------------------------------|----------------------------|-----|-------|-------|---------|------|--|---|---|---|------|------|
| thritis              |          |        |      |        |                                                   | ulator                     |     |       |       |         |      |  |   |   |   |      |      |
| Rheumatoid Arthritis | C0003873 | CCCK   | 885  | P06307 | cholecystokinin                                   |                            | 326 | 0.453 | 0.846 | 3.3E-05 | 0.03 |  | 1 | 3 | 0 | 2015 | 2019 |
| Rheumatoid Arthritis | C0003873 | APLN   | 8862 | Q9ULZ1 | apelin                                            |                            | 226 | 0.497 | 0.769 | 0.45897 | 0.03 |  | 1 | 3 | 0 | 2017 | 2019 |
| Rheumatoid Arthritis | C0003873 | PER2   | 8864 | O15055 | period circadian regulator 2                      | Transcription factor       | 238 | 0.488 | 0.846 | 0.7148  | 0.03 |  | 1 | 3 | 3 | 2013 | 2017 |
| Rheumatoid Arthritis | C0003873 | CCRL2  | 9034 | O00421 | C-C motif chemokine receptor like 2               | G-protein coupled receptor | 59  | 0.621 | 0.654 | 0.3681  | 0.03 |  | 1 | 3 | 0 | 2004 | 2010 |
| Rheumatoid Arthritis | C0003873 | FCGR2C | 9103 | P31995 | Fc fragment of IgG receptor IIc (gene/pseudogene) | Cell adhesion              | 71  | 0.61  | 0.654 |         | 0.03 |  | 1 | 3 | 0 | 2004 | 2017 |
| Rheumatoid Arthritis | C0003873 | LPAR2  | 9170 | Q9HBW0 | lysophosphatidic acid receptor 2                  | G-protein coupled receptor | 285 | 0.463 | 0.846 | 0.03658 | 0.03 |  | 1 | 3 | 0 | 1999 | 2012 |

|                      |          |        |      |        |                                                 |                      |     |       |       |          |      |  |   |   |   |      |      |
|----------------------|----------|--------|------|--------|-------------------------------------------------|----------------------|-----|-------|-------|----------|------|--|---|---|---|------|------|
| Rheumatoid Arthritis | C0003873 | XP R1  | 9213 | Q9UBH6 | xenotropic and polytropic retrovirus receptor 1 | Transporter          | 217 | 0.488 | 0.731 | 0.999    | 0.03 |  | 1 | 3 | 0 | 2012 | 2018 |
| Rheumatoid Arthritis | C0003873 | CD6    | 923  | P30203 | CD6 molecule                                    | Enzyme               | 216 | 0.489 | 0.808 | 9.27E-05 | 0.03 |  | 1 | 3 | 0 | 2009 | 2016 |
| Rheumatoid Arthritis | C0003873 | ASIC3  | 9311 | Q9UHC3 | acid sensing ion channel subunit 3              | Ion channel          | 51  | 0.663 | 0.538 | 3.41E-07 | 0.03 |  | 1 | 3 | 0 | 2014 | 2018 |
| Rheumatoid Arthritis | C0003873 | CD163  | 9332 | Q86VB7 | CD163 molecule                                  | Enzyme               | 369 | 0.427 | 0.846 | 0.00834  | 0.03 |  | 1 | 3 | 0 | 2012 | 2019 |
| Rheumatoid Arthritis | C0003873 | KL     | 9365 | Q9UEF7 | klotho                                          | Enzyme               | 332 | 0.448 | 0.769 | 0.00224  | 0.03 |  | 1 | 3 | 0 | 2007 | 2020 |
| Rheumatoid Arthritis | C0003873 | FHL5   | 9457 | Q5TD97 | four and a half LIM domains 5                   | Transcription factor | 153 | 0.53  | 0.769 | 4.85E-10 | 0.03 |  | 1 | 3 | 0 | 2017 | 2019 |
| Rheumatoid Ar        | C0003873 | ENTPD1 | 953  | P49961 | ectonucleoside triphosphate diphosph            | Enzyme               | 206 | 0.499 | 0.769 | 0.0080   | 0.03 |  | 1 | 3 | 0 | 2018 | 2019 |

|                                                 |                          |                       |                                  |            |                                                         |                                         |         |                       |                       |                                  |          |  |                   |   |   |          |                  |
|-------------------------------------------------|--------------------------|-----------------------|----------------------------------|------------|---------------------------------------------------------|-----------------------------------------|---------|-----------------------|-----------------------|----------------------------------|----------|--|-------------------|---|---|----------|------------------|
| thr<br>itis                                     |                          |                       |                                  |            | hohydro<br>lase 1                                       |                                         |         |                       |                       | 7<br>2                           |          |  |                   |   |   |          |                  |
| Rh<br>eu<br>ma<br>toi<br>d<br>Ar<br>thr<br>itis | C<br>00<br>03<br>87<br>3 | BM<br>S1              | 9<br>7<br>9<br>0                 | Q146<br>92 | BMS1<br>ribosome<br>biogenesis<br>factor                |                                         | 19<br>2 | 0<br>.<br>4<br>9<br>9 | 0<br>.<br>8<br>4<br>6 | 0.<br>0<br>0<br>0<br>1<br>7<br>5 | 0.<br>03 |  | 0.<br>6<br>6<br>7 | 3 | 0 | 20<br>08 | 2<br>0<br>1<br>9 |
| Rh<br>eu<br>ma<br>toi<br>d<br>Ar<br>thr<br>itis | C<br>00<br>03<br>87<br>3 | CD<br>C4<br>2         | 9<br>9<br>8                      | P6095<br>3 | cell<br>division<br>cycle 42                            | En<br>zy<br>me<br>mo<br>dul<br>ato<br>r | 32<br>7 | 0<br>.<br>4<br>5<br>8 | 0<br>.<br>8<br>4<br>6 | 0.<br>7<br>8<br>7<br>2<br>8      | 0.<br>03 |  | 1                 | 3 | 0 | 19<br>89 | 2<br>0<br>1<br>6 |
| Rh<br>eu<br>ma<br>toi<br>d<br>Ar<br>thr<br>itis | C<br>00<br>03<br>87<br>3 | SC<br>O2              | 9<br>9<br>9<br>7                 | O438<br>19 | synthesi<br>s of<br>cytochro<br>me C<br>oxidase<br>2    | En<br>zy<br>me                          | 29<br>4 | 0<br>.<br>4<br>7<br>9 | 0<br>.<br>8<br>4<br>6 | 7.<br>5<br>5<br>E<br>-<br>0<br>7 | 0.<br>03 |  | 1                 | 3 | 0 | 20<br>14 | 2<br>0<br>1<br>9 |
| Rh<br>eu<br>ma<br>toi<br>d<br>Ar<br>thr<br>itis | C<br>00<br>03<br>87<br>3 | MI<br>R7<br>60        | 1<br>E<br>+<br>0<br>8            |            | microRNA<br>760                                         |                                         | 37      | 0<br>.<br>6<br>7<br>4 | 0<br>.<br>3<br>8<br>5 |                                  | 0.<br>02 |  | 1                 | 2 | 0 | 20<br>17 | 2<br>0<br>1<br>9 |
| Rh<br>eu<br>ma<br>toi<br>d<br>Ar<br>thr<br>itis | C<br>00<br>03<br>87<br>3 | SH<br>2B<br>3         | 1<br>0<br>0<br>1<br>9            | Q9U<br>QQ2 | SH2B adaptor<br>protein 3                               |                                         | 21<br>2 | 0<br>.<br>5<br>2<br>7 | 0<br>.<br>6<br>9<br>2 | 0.<br>0<br>0<br>0<br>1<br>0<br>3 | 0.<br>02 |  | 1                 | 2 | 0 | 20<br>09 | 2<br>0<br>1<br>7 |
| Rh<br>eu<br>ma<br>toi<br>d<br>Ar<br>thr<br>itis | C<br>00<br>03<br>87<br>3 | LI<br>NC<br>016<br>72 | 1.<br>0<br>1<br>E<br>+<br>0<br>8 |            | long<br>intergenic<br>non-protein<br>coding RNA<br>1672 |                                         | 26<br>8 | 0<br>.<br>4<br>6<br>2 | 0<br>.<br>8<br>4<br>6 |                                  | 0.<br>02 |  | 1                 | 2 | 0 | 20<br>17 | 2<br>0<br>1<br>8 |
| Rh<br>eu<br>ma<br>toi                           | C<br>00<br>03            | RP<br>L17<br>-<br>C1  | 1.<br>0<br>1<br>E                |            | RPL17-<br>C18orf32<br>readthrough                       |                                         | 93      | 0<br>.<br>5           | 0<br>.<br>6           | 0.<br>5<br>7<br>5                | 0.<br>02 |  | 1                 | 2 | 0 | 20<br>04 | 2<br>0<br>1<br>7 |



|                                                 |                          |                          |                                  |            |                                                                                       |                                                              |         |                       |                       |                             |          |  |         |   |   |          |                  |
|-------------------------------------------------|--------------------------|--------------------------|----------------------------------|------------|---------------------------------------------------------------------------------------|--------------------------------------------------------------|---------|-----------------------|-----------------------|-----------------------------|----------|--|---------|---|---|----------|------------------|
| d<br>Ar<br>thr<br>itis                          | 87<br>3                  | 8or<br>f32               | +<br>0<br>8                      |            |                                                                                       |                                                              |         | 7<br>2                | 1<br>5                | 0<br>2                      |          |  |         |   |   |          |                  |
| Rh<br>eu<br>ma<br>toi<br>d<br>Ar<br>thr<br>itis | C<br>00<br>03<br>87<br>3 | LI<br>NC<br>-<br>RO<br>R | 1.<br>0<br>1<br>E<br>+<br>0<br>8 |            | long<br>intergenic<br>non-protein<br>coding RNA,<br>regulator of<br>reprogrammin<br>g |                                                              | 10<br>8 | 0<br>.<br>5<br>4<br>8 | 0<br>.<br>7<br>6<br>9 |                             | 0.<br>02 |  | 0.<br>5 | 2 | 0 | 20<br>01 | 2<br>0<br>1<br>2 |
| Rh<br>eu<br>ma<br>toi<br>d<br>Ar<br>thr<br>itis | C<br>00<br>03<br>87<br>3 | AD<br>AM<br>8            | 1<br>0<br>1                      | P7832<br>5 | ADAM<br>metallop<br>eptidase<br>domain<br>8                                           | En<br>zy<br>me                                               | 81      | 0<br>.<br>5<br>9      | 0<br>.<br>7<br>3<br>1 | 2.<br>2<br>E<br>-<br>1<br>4 | 0.<br>02 |  | 1       | 2 | 0 | 20<br>09 | 2<br>0<br>1<br>4 |
| Rh<br>eu<br>ma<br>toi<br>d<br>Ar<br>thr<br>itis | C<br>00<br>03<br>87<br>3 | CD<br>K2                 | 1<br>0<br>1<br>7                 | P2494<br>1 | cyclin<br>depende<br>nt kinase<br>2                                                   | Ki<br>nas<br>e                                               | 27<br>0 | 0<br>.<br>4<br>5<br>6 | 0<br>.<br>6<br>9<br>2 | 0.<br>6<br>1<br>0<br>5<br>4 | 0.<br>02 |  | 1       | 2 | 0 | 19<br>97 | 2<br>0<br>1<br>1 |
| Rh<br>eu<br>ma<br>toi<br>d<br>Ar<br>thr<br>itis | C<br>00<br>03<br>87<br>3 | CA<br>LC<br>RL           | 1<br>0<br>2<br>0<br>3            | Q166<br>02 | calcitoni<br>n<br>receptor<br>like<br>receptor                                        | G-<br>pro<br>tei<br>n<br>co<br>upl<br>ed<br>rec<br>ept<br>or | 47      | 0<br>.<br>6<br>5<br>3 | 0<br>.<br>6<br>9<br>2 | 0.<br>9<br>8<br>5<br>3      | 0.<br>02 |  | 0.<br>5 | 2 | 0 | 20<br>06 | 2<br>0<br>0<br>9 |
| Rh<br>eu<br>ma<br>toi<br>d<br>Ar<br>thr<br>itis | C<br>00<br>03<br>87<br>3 | PR<br>G4                 | 1<br>0<br>2<br>1<br>6            | Q929<br>54 | proteoglycan 4                                                                        |                                                              | 73      | 0<br>.<br>6<br>0<br>1 | 0<br>.<br>6<br>1<br>5 | 1.<br>7<br>E<br>-<br>0<br>8 | 0.<br>02 |  | 1       | 2 | 0 | 20<br>15 | 2<br>0<br>1<br>7 |
| Rh<br>eu<br>ma<br>toi<br>d<br>Ar<br>thr<br>itis | C<br>00<br>03<br>87<br>3 | SP<br>RY<br>1            | 1<br>0<br>2<br>5<br>2            | O436<br>09 | sprouty<br>RTK<br>signalin<br>g<br>antagoni<br>st 1                                   | Sig<br>nal<br>ing                                            | 63      | 0<br>.<br>6<br>0<br>3 | 0<br>.<br>5<br>7<br>7 | 0.<br>0<br>3<br>0<br>4      | 0.<br>02 |  | 1       | 2 | 0 | 20<br>17 | 2<br>0<br>1<br>9 |

|                      |          |                 |          |        |                                               |                      |     |       |        |          |      |  |     |   |   |      |      |
|----------------------|----------|-----------------|----------|--------|-----------------------------------------------|----------------------|-----|-------|--------|----------|------|--|-----|---|---|------|------|
| Rheumatoid Arthritis | C0003873 | RAMP2           | 10266    | O60895 | receptor activity modifying protein 2         | Receptor             | 60  | 0.626 | 0.654  | 0.051127 | 0.02 |  | 0.5 | 2 | 0 | 2006 | 2009 |
| Rheumatoid Arthritis | C0003873 | CC L26          | 10344    | Q9Y258 | C-C motif chemokine ligand 26                 | Signaling            | 60  | 0.617 | 0.654  | 0.010114 | 0.02 |  | 0.5 | 2 | 0 | 2005 | 2009 |
| Rheumatoid Arthritis | C0003873 | WARS2           | 10352    | Q9UGM6 | tryptophanyl tRNA synthetase 2, mitochondrial |                      | 110 | 0.617 | 0.657  | 0.050885 | 0.02 |  | 1   | 2 | 0 | 2015 | 2019 |
| Rheumatoid Arthritis | C0003873 | LINC02210-CRHR1 | 1005E+08 | P34998 | LINC02210-CRHR1 readthrough                   |                      | 123 | 0.57  | 0.692  |          | 0.02 |  | 1   | 2 | 0 | 2001 | 2011 |
| Rheumatoid Arthritis | C0003873 | SEMA4D          | 10507    | Q92854 | semaphorin 4D                                 | Signaling            | 109 | 0.564 | 0.769  | 0.9742   | 0.02 |  | 1   | 2 | 0 | 2015 | 2018 |
| Rheumatoid Arthritis | C0003873 | CEBP D          | 1052     | P49716 | CCAAT enhancer binding protein delta          | Transcription factor | 97  | 0.579 | 0.7619 | 0.61219  | 0.02 |  | 1   | 2 | 0 | 2012 | 2017 |
| Rheumatoid Ar        | C0003873 | KAT5            | 10524    | Q92993 | lysine acetyltransferase 5                    |                      | 138 | 0.534 | 0.769  | 0.0882   | 0.02 |  | 1   | 2 | 0 | 2010 | 2019 |

|                                                 |                          |                      |                       |            |                                                             |                                                              |         |                       |                       |                                  |          |  |   |   |   |                         |
|-------------------------------------------------|--------------------------|----------------------|-----------------------|------------|-------------------------------------------------------------|--------------------------------------------------------------|---------|-----------------------|-----------------------|----------------------------------|----------|--|---|---|---|-------------------------|
| thr<br>itis                                     |                          |                      |                       |            |                                                             |                                                              |         |                       | 3<br>4                |                                  |          |  |   |   |   |                         |
| Rh<br>eu<br>ma<br>toi<br>d<br>Ar<br>thr<br>itis | C<br>00<br>03<br>87<br>3 | IV<br>NS<br>1A<br>BP | 1<br>0<br>6<br>2<br>5 | Q9Y6<br>Y0 | influenza virus<br>NS1A binding<br>protein                  |                                                              | 67      | 0<br>.<br>6<br>0<br>8 | 0<br>.<br>7<br>6<br>9 | 0.<br>9<br>9<br>4<br>4<br>2      | 0.<br>02 |  | 1 | 2 | 0 | 20<br>03<br>0<br>4      |
| Rh<br>eu<br>ma<br>toi<br>d<br>Ar<br>thr<br>itis | C<br>00<br>03<br>87<br>3 | EB<br>P              | 1<br>0<br>6<br>8<br>2 | Q151<br>25 | EBP<br>choleste<br>nol<br>delta-<br>isomeras<br>e           | En<br>zy<br>me                                               | 24<br>3 | 0<br>.<br>4<br>9<br>4 | 0<br>.<br>8<br>4<br>6 | 0.<br>9<br>3<br>6<br>4<br>5      | 0.<br>02 |  | 1 | 2 | 0 | 20<br>00<br>0<br>9      |
| Rh<br>eu<br>ma<br>toi<br>d<br>Ar<br>thr<br>itis | C<br>00<br>03<br>87<br>3 | CT<br>SC             | 1<br>0<br>7<br>5      | P5363<br>4 | cathepsi<br>n C                                             | En<br>zy<br>me                                               | 13<br>9 | 0<br>.<br>5<br>4<br>1 | 0<br>.<br>7<br>3<br>1 | 1.<br>1<br>5<br>E<br>-<br>0<br>7 | 0.<br>02 |  | 1 | 2 | 0 | 20<br>17<br>0<br>1<br>7 |
| Rh<br>eu<br>ma<br>toi<br>d<br>Ar<br>thr<br>itis | C<br>00<br>03<br>87<br>3 | CF<br>TR             | 1<br>0<br>8<br>0      | P1356<br>9 | CF<br>transme<br>mbrane<br>conduct<br>ance<br>regulato<br>r | Ion<br>ch<br>an<br>nel                                       | 47<br>6 | 0<br>.<br>4<br>2<br>4 | 0<br>.<br>8<br>8<br>5 | 2.<br>1<br>7<br>E<br>-<br>5<br>8 | 0.<br>02 |  | 1 | 2 | 0 | 19<br>99<br>0<br>1<br>1 |
| Rh<br>eu<br>ma<br>toi<br>d<br>Ar<br>thr<br>itis | C<br>00<br>03<br>87<br>3 | CC<br>R9             | 1<br>0<br>8<br>0<br>3 | P5168<br>6 | C-C<br>motif<br>chemoki<br>ne<br>receptor<br>9              | G-<br>pro<br>tei<br>n<br>co<br>upl<br>ed<br>rec<br>ept<br>or | 90      | 0<br>.<br>5<br>7<br>3 | 0<br>.<br>6<br>9<br>2 | 0.<br>0<br>0<br>4<br>1<br>9<br>9 | 0.<br>02 |  | 1 | 2 | 0 | 20<br>10<br>0<br>1<br>4 |
| Rh<br>eu<br>ma<br>toi<br>d<br>Ar<br>thr<br>itis | C<br>00<br>03<br>87<br>3 | CH<br>AT             | 1<br>1<br>0<br>3      | P2832<br>9 | choline<br>O-<br>acetyltra<br>nsferase                      | En<br>zy<br>me                                               | 23<br>0 | 0<br>.<br>5<br>2      | 0<br>.<br>8<br>0<br>8 | 5.<br>6<br>3<br>E<br>-<br>1<br>1 | 0.<br>02 |  | 1 | 2 | 0 | 20<br>08<br>0<br>1<br>2 |

|                      |          |           |        |        |                                            |                      |     |       |       |          |      |  |     |   |   |      |      |
|----------------------|----------|-----------|--------|--------|--------------------------------------------|----------------------|-----|-------|-------|----------|------|--|-----|---|---|------|------|
| Rheumatoid Arthritis | C0003873 | PSI P1    | 11168  | O75475 | PC4 and SFRS1 interacting protein 1        | Signaling            | 210 | 0.49  | 0.846 | 0.968    | 0.02 |  | 1   | 2 | 0 | 1992 | 2019 |
| Rheumatoid Arthritis | C0003873 | IRAK3     | 11213  | Q9Y616 | interleukin 1 receptor associated kinase 3 | Kinase               | 59  | 0.615 | 0.615 | 5.31E-21 | 0.02 |  | 1   | 2 | 0 | 2017 | 2018 |
| Rheumatoid Arthritis | C0003873 | KL F12    | 11278  | Q9Y4X4 | Kruppel like factor 12                     | Nucleic acid binding | 58  | 0.647 | 0.654 | 0.9867   | 0.02 |  | 0.5 | 2 | 2 | 2008 | 2011 |
| Rheumatoid Arthritis | C0003873 | SAA1      | 113174 | Q96ER3 | serum amyloid A like 1                     |                      | 4   | 0.89  | 0.115 | 4.32E-09 | 0.02 |  | 1   | 2 | 0 | 2011 | 2018 |
| Rheumatoid Arthritis | C0003873 | TIRAP     | 114609 | P58753 | TIR domain containing adaptor protein      |                      | 74  | 0.604 | 0.709 | 0.00761  | 0.02 |  | 1   | 2 | 1 | 2008 | 2011 |
| Rheumatoid Arthritis | C0003873 | MIR155 HG | 114614 |        | MIR155 host gene                           |                      | 56  | 0.617 | 0.615 |          | 0.02 |  | 1   | 2 | 1 | 2008 | 2017 |
| Rheumatoid Ar        | C0003873 | CHUK      | 1147   | O15111 | component of inhibitor of nuclear factor   | Kinase               | 125 | 0.556 | 0.731 | 0.9403   | 0.02 |  | 1   | 2 | 0 | 2003 | 2017 |

|                                                 |                          |                      |                            |            |                                    |                                                          |         |                       |                       |                                  |          |  |   |   |   |          |                  |
|-------------------------------------------------|--------------------------|----------------------|----------------------------|------------|------------------------------------|----------------------------------------------------------|---------|-----------------------|-----------------------|----------------------------------|----------|--|---|---|---|----------|------------------|
| thr<br>itis                                     |                          |                      |                            |            | kappa B<br>kinase<br>complex       |                                                          |         |                       |                       |                                  |          |  |   |   |   |          |                  |
| Rh<br>eu<br>ma<br>toi<br>d<br>Ar<br>thr<br>itis | C<br>00<br>03<br>87<br>3 | C1<br>QT<br>NF<br>3  | 1<br>1<br>4<br>8<br>9<br>9 | Q9BX<br>J4 | C1q and TNF<br>related 3           |                                                          | 26      | 0<br>.<br>6<br>9<br>5 | 0<br>.<br>5<br>7<br>7 | 1.<br>8<br>1<br>E<br>-<br>0<br>7 | 0.<br>02 |  | 1 | 2 | 0 | 20<br>14 | 2<br>0<br>1<br>9 |
| Rh<br>eu<br>ma<br>toi<br>d<br>Ar<br>thr<br>itis | C<br>00<br>03<br>87<br>3 | C1<br>QT<br>NF<br>6  | 1<br>1<br>4<br>9<br>0<br>4 | Q9BX<br>I9 | C1q and TNF<br>related 6           |                                                          | 33      | 0<br>.<br>6<br>8<br>2 | 0<br>.<br>5<br>7<br>7 | 9.<br>0<br>1<br>E<br>-<br>0<br>6 | 0.<br>02 |  | 1 | 2 | 0 | 20<br>10 | 2<br>0<br>1<br>5 |
| Rh<br>eu<br>ma<br>toi<br>d<br>Ar<br>thr<br>itis | C<br>00<br>03<br>87<br>3 | TA<br>DA<br>1        | 1<br>1<br>7<br>1<br>4<br>3 | Q96B<br>N2 | transcriptional<br>adaptor 1       |                                                          | 23      | 0<br>.<br>7<br>0<br>5 | 0<br>.<br>6<br>5<br>4 | 0.<br>0<br>9<br>0<br>7<br>0<br>8 | 0.<br>02 |  | 1 | 2 | 0 | 20<br>03 | 2<br>0<br>1<br>0 |
| Rh<br>eu<br>ma<br>toi<br>d<br>Ar<br>thr<br>itis | C<br>00<br>03<br>87<br>3 | LT<br>B4<br>R        | 1<br>2<br>4<br>1           | Q157<br>22 | leukotrie<br>ne B4<br>receptor     | G-pro<br>tei<br>n<br>co<br>upl<br>ed<br>rec<br>ept<br>or | 10<br>7 | 0<br>.<br>5<br>7<br>6 | 0<br>.<br>6<br>9<br>2 | 0.<br>1<br>1<br>9<br>9<br>4      | 0.<br>02 |  | 1 | 2 | 0 | 20<br>03 | 2<br>0<br>1<br>7 |
| Rh<br>eu<br>ma<br>toi<br>d<br>Ar<br>thr<br>itis | C<br>00<br>03<br>87<br>3 | CN<br>R1             | 1<br>2<br>6<br>8           | P2155<br>4 | cannabi<br>noid<br>receptor<br>1   | G-pro<br>tei<br>n<br>co<br>upl<br>ed<br>rec<br>ept<br>or | 39<br>3 | 0<br>.<br>4<br>4<br>6 | 0<br>.<br>8<br>0<br>8 | 0.<br>5<br>0<br>6<br>5<br>2      | 0.<br>02 |  | 1 | 2 | 0 | 20<br>09 | 2<br>0<br>1<br>9 |
| Rh<br>eu<br>ma<br>toi<br>d<br>Ar                | C<br>00<br>03<br>87<br>3 | PP<br>AR<br>GC<br>1B | 1<br>3<br>3<br>5<br>2<br>2 | Q86Y<br>N6 | PPARG<br>coactiva<br>tor 1<br>beta | Tr<br>ans<br>cri<br>pti<br>on<br>fac<br>tor              | 10<br>2 | 0<br>.<br>5<br>6<br>9 | 0<br>.<br>7<br>3<br>1 | 0.<br>5<br>0<br>3<br>2<br>1      | 0.<br>02 |  | 1 | 2 | 0 | 20<br>14 | 2<br>0<br>1<br>9 |

|                                                 |                          |                |                  |            |                                                               |                                             |         |                       |                       |                                  |          |  |   |   |   |          |                  |
|-------------------------------------------------|--------------------------|----------------|------------------|------------|---------------------------------------------------------------|---------------------------------------------|---------|-----------------------|-----------------------|----------------------------------|----------|--|---|---|---|----------|------------------|
| thr<br>itis                                     |                          |                |                  |            |                                                               |                                             |         |                       |                       |                                  |          |  |   |   |   |          |                  |
| Rh<br>eu<br>ma<br>toi<br>d<br>Ar<br>thr<br>itis | C<br>00<br>03<br>87<br>3 | CO<br>X8<br>A  | 1<br>3<br>5<br>1 | P1017<br>6 | cytochrome c<br>oxidase<br>subunit<br>8A                      | En<br>zy<br>me                              | 52<br>6 | 0<br>.<br>4           | 0<br>.<br>8<br>4<br>6 | 0.<br>1<br>6<br>0<br>6           | 0.<br>02 |  | 1 | 2 | 0 | 20<br>00 | 2<br>0<br>1<br>8 |
| Rh<br>eu<br>ma<br>toi<br>d<br>Ar<br>thr<br>itis | C<br>00<br>03<br>87<br>3 | CP<br>B1       | 1<br>3<br>6<br>0 | P1508<br>6 | carboxy<br>peptidas<br>e B1                                   | En<br>zy<br>me                              | 57      | 0<br>.<br>6<br>2<br>6 | 0<br>.<br>6<br>5<br>4 | 2.<br>6<br>1<br>E<br>-<br>2<br>2 | 0.<br>02 |  | 1 | 2 | 0 | 20<br>11 | 2<br>0<br>1<br>4 |
| Rh<br>eu<br>ma<br>toi<br>d<br>Ar<br>thr<br>itis | C<br>00<br>03<br>87<br>3 | CR<br>1        | 1<br>3<br>7<br>8 | P1792<br>7 | complement<br>C3b/C4b<br>receptor 1<br>(Knops blood<br>group) |                                             | 12<br>9 | 0<br>.<br>5<br>3<br>3 | 0<br>.<br>8<br>0<br>8 | 1.<br>6<br>5<br>E<br>-<br>3<br>5 | 0.<br>02 |  | 1 | 2 | 0 | 20<br>13 | 2<br>0<br>1<br>4 |
| Rh<br>eu<br>ma<br>toi<br>d<br>Ar<br>thr<br>itis | C<br>00<br>03<br>87<br>3 | AT<br>F2       | 1<br>3<br>8<br>6 | P1533<br>6 | activatin<br>g<br>transcrip<br>tion<br>factor 2               | Tr<br>ans<br>cri<br>pti<br>on<br>fac<br>tor | 12<br>2 | 0<br>.<br>5<br>5<br>1 | 0<br>.<br>8<br>0<br>8 | 0.<br>9<br>9<br>1<br>3<br>1      | 0.<br>02 |  | 1 | 2 | 0 | 20<br>07 | 2<br>0<br>1<br>9 |
| Rh<br>eu<br>ma<br>toi<br>d<br>Ar<br>thr<br>itis | C<br>00<br>03<br>87<br>3 | CR<br>EB<br>BP | 1<br>3<br>8<br>7 | Q927<br>93 | CREB binding<br>protein                                       |                                             | 43<br>8 | 0<br>.<br>4<br>2<br>8 | 0<br>.<br>8<br>0<br>8 | 1                                | 0.<br>02 |  | 1 | 2 | 0 | 20<br>03 | 2<br>0<br>1<br>8 |
| Rh<br>eu<br>ma<br>toi<br>d<br>Ar<br>thr<br>itis | C<br>00<br>03<br>87<br>3 | CR<br>HR<br>1  | 1<br>3<br>9<br>4 | P3499<br>8 | corticotropin<br>releasing<br>hormone<br>receptor 1           |                                             | 18<br>3 | 0<br>.<br>5<br>1<br>7 | 0<br>.<br>7<br>6<br>9 | 3.<br>7<br>9<br>E<br>-<br>0<br>5 | 0.<br>02 |  | 1 | 2 | 0 | 20<br>01 | 2<br>0<br>1<br>1 |
| Rh<br>eu<br>ma<br>toi                           | C<br>00<br>03            | CS<br>F3       | 1<br>4<br>4<br>0 | P0991<br>9 | colony<br>stimulating<br>factor 3                             |                                             | 68<br>7 | 0<br>.<br>3           | 0<br>.<br>8           | 0.<br>3<br>8<br>0                | 0.<br>02 |  | 1 | 2 | 0 | 20<br>17 | 2<br>0<br>1<br>7 |

|                                                 |                          |                |                            |            |                                     |                                                              |         |                       |                       |                                  |          |  |   |   |   |          |                  |
|-------------------------------------------------|--------------------------|----------------|----------------------------|------------|-------------------------------------|--------------------------------------------------------------|---------|-----------------------|-----------------------|----------------------------------|----------|--|---|---|---|----------|------------------|
| d<br>Ar<br>thr<br>itis                          | 87<br>3                  |                |                            |            |                                     |                                                              |         | 7<br>7                | 8<br>5                | 4<br>6                           |          |  |   |   |   |          |                  |
| Rh<br>eu<br>ma<br>toi<br>d<br>Ar<br>thr<br>itis | C<br>00<br>03<br>87<br>3 | CS<br>K        | 1<br>4<br>4<br>5           | P4124<br>0 | C-<br>terminal<br>Src<br>kinase     | Ki<br>nas<br>e                                               | 91      | 0<br>.<br>6<br>0<br>6 | 0<br>.<br>6<br>9<br>2 | 0.<br>9<br>9<br>7<br>7           | 0.<br>02 |  | 1 | 2 | 2 | 19<br>99 | 2<br>0<br>1<br>7 |
| Rh<br>eu<br>ma<br>toi<br>d<br>Ar<br>thr<br>itis | C<br>00<br>03<br>87<br>3 | CS<br>T3       | 1<br>4<br>7<br>1           | P0103<br>4 | cystatin<br>C                       |                                                              | 37<br>0 | 0<br>.<br>4<br>3<br>6 | 0<br>.<br>8<br>0<br>8 | 0.<br>0<br>3<br>9<br>0<br>1      | 0.<br>02 |  | 1 | 2 | 0 | 20<br>07 | 2<br>0<br>1<br>8 |
| Rh<br>eu<br>ma<br>toi<br>d<br>Ar<br>thr<br>itis | C<br>00<br>03<br>87<br>3 | AD<br>RA<br>1A | 1<br>4<br>8                | P3534<br>8 | adrenoc<br>eptor<br>alpha 1A        | G-<br>pro<br>tei<br>n<br>co<br>upl<br>ed<br>rec<br>ept<br>or | 29<br>4 | 0<br>.<br>4<br>6<br>2 | 0<br>.<br>8<br>4<br>6 | 3.<br>3<br>7<br>E<br>-<br>0<br>7 | 0.<br>02 |  | 1 | 2 | 0 | 19<br>99 | 2<br>0<br>0<br>4 |
| Rh<br>eu<br>ma<br>toi<br>d<br>Ar<br>thr<br>itis | C<br>00<br>03<br>87<br>3 | CT<br>SB       | 1<br>5<br>0<br>8           | P0785<br>8 | cathepsi<br>n B                     | En<br>zy<br>me                                               | 30<br>4 | 0<br>.<br>4<br>5<br>7 | 0<br>.<br>8<br>4<br>6 | 5.<br>8<br>8<br>E<br>-<br>1<br>1 | 0.<br>02 |  | 1 | 2 | 0 | 19<br>91 | 2<br>0<br>1<br>4 |
| Rh<br>eu<br>ma<br>toi<br>d<br>Ar<br>thr<br>itis | C<br>00<br>03<br>87<br>3 | AD<br>RA<br>2B | 1<br>5<br>1                | P1808<br>9 | adrenoc<br>eptor<br>alpha 2B        | G-<br>pro<br>tei<br>n<br>co<br>upl<br>ed<br>rec<br>ept<br>or | 29<br>6 | 0<br>.<br>4<br>6<br>5 | 0<br>.<br>8<br>4<br>6 | 4.<br>4<br>5<br>E<br>-<br>0<br>6 | 0.<br>02 |  | 1 | 2 | 0 | 19<br>99 | 2<br>0<br>0<br>4 |
| Rh<br>eu<br>ma<br>toi<br>d<br>Ar                | C<br>00<br>03<br>87<br>3 | BT<br>LA       | 1<br>5<br>1<br>8<br>8<br>8 | Q7Z6<br>A9 | B and T<br>lymphocyte<br>associated |                                                              | 74      | 0<br>.<br>5<br>9<br>3 | 0<br>.<br>5<br>7<br>7 | 0.<br>0<br>2<br>0<br>9           | 0.<br>02 |  | 1 | 2 | 0 | 20<br>06 | 2<br>0<br>1<br>7 |

|                                                 |                          |                      |                            |            |                                                                              |                |         |                       |                       |                                  |          |  |         |   |   |          |                  |
|-------------------------------------------------|--------------------------|----------------------|----------------------------|------------|------------------------------------------------------------------------------|----------------|---------|-----------------------|-----------------------|----------------------------------|----------|--|---------|---|---|----------|------------------|
| thr<br>itis                                     |                          |                      |                            |            |                                                                              |                |         |                       |                       | 8<br>7                           |          |  |         |   |   |          |                  |
| Rh<br>eu<br>ma<br>toi<br>d<br>Ar<br>thr<br>itis | C<br>00<br>03<br>87<br>3 | CY<br>P2<br>D6       | 1<br>5<br>6<br>5           | P1063<br>5 | cytochrome<br>P450 family 2<br>subfamily D<br>member 6                       |                | 43<br>2 | 0<br>.<br>4<br>3<br>7 | 0<br>.<br>8<br>8<br>5 | 1.<br>0<br>8<br>E<br>-<br>2<br>5 | 0.<br>02 |  | 0.<br>5 | 2 | 0 | 19<br>94 | 1<br>9<br>9<br>6 |
| Rh<br>eu<br>ma<br>toi<br>d<br>Ar<br>thr<br>itis | C<br>00<br>03<br>87<br>3 | CY<br>P3<br>A5       | 1<br>5<br>7<br>7           | P2081<br>5 | cytochro<br>me P450<br>family 3<br>subfamil<br>y A<br>member<br>5            | En<br>zy<br>me | 17<br>9 | 0<br>.<br>5<br>1<br>1 | 0<br>.<br>8<br>4<br>6 | 6.<br>2<br>9<br>E<br>-<br>1<br>7 | 0.<br>02 |  | 1       | 2 | 0 | 20<br>15 | 2<br>0<br>1<br>7 |
| Rh<br>eu<br>ma<br>toi<br>d<br>Ar<br>thr<br>itis | C<br>00<br>03<br>87<br>3 | CY<br>P17<br>A1      | 1<br>5<br>8<br>6           | P0509<br>3 | cytochrome<br>P450 family<br>17 subfamily<br>A member 1                      |                | 32<br>6 | 0<br>.<br>4<br>6<br>2 | 0<br>.<br>7<br>6<br>9 | 0.<br>0<br>0<br>2<br>6<br>3      | 0.<br>02 |  | 1       | 2 | 0 | 20<br>00 | 2<br>0<br>0<br>5 |
| Rh<br>eu<br>ma<br>toi<br>d<br>Ar<br>thr<br>itis | C<br>00<br>03<br>87<br>3 | CY<br>P19<br>A1      | 1<br>5<br>8<br>8           | P1151<br>1 | cytochro<br>me P450<br>family<br>19<br>subfamil<br>y A<br>member<br>1        | En<br>zy<br>me | 51<br>9 | 0<br>.<br>4<br>1      | 0<br>.<br>8<br>8<br>5 | 1.<br>7<br>E<br>-<br>0<br>5      | 0.<br>02 |  | 1       | 2 | 0 | 19<br>99 | 2<br>0<br>0<br>9 |
| Rh<br>eu<br>ma<br>toi<br>d<br>Ar<br>thr<br>itis | C<br>00<br>03<br>87<br>3 | CY<br>P26<br>A1      | 1<br>5<br>9<br>2           | O431<br>74 | cytochro<br>me P450<br>family<br>26<br>subfamil<br>y A<br>member<br>1        | En<br>zy<br>me | 59      | 0<br>.<br>6<br>1<br>9 | 0<br>.<br>5<br>7<br>7 | 8.<br>4<br>3<br>E<br>-<br>1<br>1 | 0.<br>02 |  | 1       | 2 | 0 | 20<br>02 | 2<br>0<br>1<br>9 |
| Rh<br>eu<br>ma<br>toi<br>d<br>Ar<br>thr<br>itis | C<br>00<br>03<br>87<br>3 | DN<br>AJ<br>B1<br>P1 | 1<br>7<br>1<br>2<br>2<br>1 |            | DnaJ heat<br>shock protein<br>family<br>(Hsp40)<br>member B1<br>pseudogene 1 |                | 51      | 0<br>.<br>6<br>5      | 0<br>.<br>6<br>5<br>4 |                                  | 0.<br>02 |  | 1       | 2 | 0 | 20<br>19 | 2<br>0<br>1<br>9 |
| Rh<br>eu<br>ma<br>toi                           | C<br>00<br>03            | NL<br>RP<br>6        | 1<br>7<br>1<br>3           | P5904<br>4 | NLR family<br>pyrin domain<br>containing 6                                   |                | 58      | 0<br>.<br>6           | 0<br>.<br>7           | 0.<br>0<br>0<br>0                | 0.<br>02 |  | 1       | 2 | 0 | 20<br>17 | 2<br>0<br>1<br>7 |



|                                                 |                          |                |                  |            |                                                   |                                                          |         |                       |                                 |                                  |          |  |         |   |   |          |                  |
|-------------------------------------------------|--------------------------|----------------|------------------|------------|---------------------------------------------------|----------------------------------------------------------|---------|-----------------------|---------------------------------|----------------------------------|----------|--|---------|---|---|----------|------------------|
| d<br>Ar<br>thr<br>itis                          | 87<br>3                  |                | 8<br>9           |            |                                                   |                                                          |         | 2<br>8                | 6<br>9                          | 2<br>7<br>4                      |          |  |         |   |   |          |                  |
| Rh<br>eu<br>ma<br>toi<br>d<br>Ar<br>thr<br>itis | C<br>00<br>03<br>87<br>3 | DH<br>CR<br>7  | 1<br>7<br>1<br>7 | Q9UB<br>M7 | 7-<br>dehydro<br>choleste<br>rol<br>reductas<br>e | En<br>zy<br>me                                           | 26<br>6 | 0<br>.<br>5           | 0<br>.<br>8<br>4<br>6           | 3.<br>9<br>5<br>E<br>-<br>1<br>3 | 0.<br>02 |  | 1       | 2 | 0 | 20<br>17 | 2<br>0<br>1<br>9 |
| Rh<br>eu<br>ma<br>toi<br>d<br>Ar<br>thr<br>itis | C<br>00<br>03<br>87<br>3 | AF<br>P        | 1<br>7<br>4      | P0277<br>1 | alpha<br>fetoprot<br>ein                          | Tr<br>ans<br>por<br>ter                                  | 39<br>2 | 0<br>.<br>4<br>2<br>9 | 0<br>.<br>8<br>8<br>5           | 1.<br>1<br>4<br>E<br>-<br>1<br>1 | 0.<br>02 |  | 1       | 2 | 0 | 20<br>17 | 2<br>0<br>1<br>9 |
| Rh<br>eu<br>ma<br>toi<br>d<br>Ar<br>thr<br>itis | C<br>00<br>03<br>87<br>3 | DN<br>AS<br>E1 | 1<br>7<br>7<br>3 | P2485<br>5 | deoxyribonuclease 1                               |                                                          | 18<br>0 | 0<br>.<br>5<br>0<br>5 | 0<br>.<br>8<br>4<br>6           | 6.<br>9<br>8<br>E<br>-<br>2<br>1 | 0.<br>02 |  | 1       | 2 | 0 | 20<br>09 | 2<br>0<br>1<br>4 |
| Rh<br>eu<br>ma<br>toi<br>d<br>Ar<br>thr<br>itis | C<br>00<br>03<br>87<br>3 | DN<br>TT       | 1<br>7<br>9<br>1 | P0405<br>3 | DNA<br>nucleoti<br>dylexotr<br>ansferas<br>e      | En<br>zy<br>me                                           | 70      | 0<br>.<br>6<br>0<br>6 | 0<br>.<br>6<br>9<br>2           | 2.<br>9<br>5<br>E<br>-<br>1<br>0 | 0.<br>02 |  | 0.<br>5 | 2 | 0 | 19<br>99 | 2<br>0<br>0<br>2 |
| Rh<br>eu<br>ma<br>toi<br>d<br>Ar<br>thr<br>itis | C<br>00<br>03<br>87<br>3 | DR<br>1        | 1<br>8<br>1<br>0 | Q016<br>58 | down-regulator of transcription 1                 |                                                          | 10      | 0<br>.<br>8<br>3<br>9 | 0<br>.<br>2<br>3<br>1<br>1<br>7 | 0.<br>9<br>2<br>1<br>1<br>7      | 0.<br>02 |  | 1       | 2 | 0 | 19<br>98 | 2<br>0<br>0<br>4 |
| Rh<br>eu<br>ma<br>toi<br>d<br>Ar<br>thr<br>itis | C<br>00<br>03<br>87<br>3 | DR<br>D2       | 1<br>8<br>1<br>3 | P1441<br>6 | dopamin<br>e<br>receptor<br>D2                    | G-pro<br>tei<br>n<br>co<br>upl<br>ed<br>rec<br>ept<br>or | 43<br>7 | 0<br>.<br>4<br>3<br>6 | 0<br>.<br>8<br>4<br>6           | 0.<br>7<br>4<br>7<br>0<br>9      | 0.<br>02 |  | 1       | 2 | 0 | 20<br>11 | 2<br>0<br>1<br>5 |

|                      |          |          |      |        |                                                               |     |       |        |        |      |  |   |   |   |      |      |
|----------------------|----------|----------|------|--------|---------------------------------------------------------------|-----|-------|--------|--------|------|--|---|---|---|------|------|
| Rheumatoid Arthritis | C0003873 | JAG1     | 182  | P78504 | jagged canonical Notch ligand 1                               | 420 | 0.429 | 0.808  | 1      | 0.02 |  | 1 | 2 | 0 | 2005 | 2009 |
| Rheumatoid Arthritis | C0003873 | TSC2D3   | 1831 | Q99576 | TSC22 domain family member 3                                  | 64  | 0.619 | 0.639  | 0.4339 | 0.02 |  | 1 | 2 | 0 | 2010 | 2014 |
| Rheumatoid Arthritis | C0003873 | DUSP1    | 1843 | P28562 | dual specificity phosphatase 1                                | 214 | 0.491 | 0.808  | 0.0151 | 0.02 |  | 1 | 2 | 0 | 2010 | 2019 |
| Rheumatoid Arthritis | C0003873 | EDN1     | 1906 | P05305 | endothelin 1                                                  | 679 | 0.388 | 0.846  | 0.4504 | 0.02 |  | 1 | 2 | 0 | 1999 | 2008 |
| Rheumatoid Arthritis | C0003873 | EFNB1    | 1947 | P98172 | ephrin B1                                                     | 134 | 0.561 | 0.769  | 0.9351 | 0.02 |  | 1 | 2 | 0 | 2008 | 2015 |
| Rheumatoid Arthritis | C0003873 | EIF4EBP1 | 1978 | Q13541 | eukaryotic translation initiation factor 4E binding protein 1 | 201 | 0.494 | 0.8756 | 0.2062 | 0.02 |  | 1 | 2 | 0 | 2018 | 2019 |
| Rheumatoid Arthritis | C0003873 | ELAVL1   | 1994 | Q15717 | ELAV like RNA binding protein 1                               | 103 | 0.561 | 0.738  | 0.988  | 0.02 |  | 1 | 2 | 0 | 2006 | 2007 |

|                                                 |                          |               |                  |            |                                                                 |                                                              |         |                       |                            |                                  |          |  |   |   |   |          |                  |
|-------------------------------------------------|--------------------------|---------------|------------------|------------|-----------------------------------------------------------------|--------------------------------------------------------------|---------|-----------------------|----------------------------|----------------------------------|----------|--|---|---|---|----------|------------------|
| Ar<br>thr<br>itis                               |                          |               |                  |            |                                                                 |                                                              |         |                       | 4<br>9                     |                                  |          |  |   |   |   |          |                  |
| Rh<br>eu<br>ma<br>toi<br>d<br>Ar<br>thr<br>itis | C<br>00<br>03<br>87<br>3 | EL<br>F3      | 1<br>9<br>9<br>9 | P7854<br>5 | E74 like<br>ETS<br>transcrip<br>tion<br>factor 3                | Tr<br>ans<br>cri<br>pti<br>on<br>fac<br>tor                  | 11<br>2 | 0<br>.<br>5<br>5<br>1 | 0<br>.<br>8<br>0<br>8      | 0.<br>9<br>8<br>3<br>2<br>3      | 0.<br>02 |  | 1 | 2 | 0 | 20<br>03 | 2<br>0<br>0<br>4 |
| Rh<br>eu<br>ma<br>toi<br>d<br>Ar<br>thr<br>itis | C<br>00<br>03<br>87<br>3 | EL<br>K3      | 2<br>0<br>0<br>4 | P4197<br>0 | ETS<br>transcrip<br>tion<br>factor<br>ELK3                      | Tr<br>ans<br>cri<br>pti<br>on<br>fac<br>tor                  | 22<br>0 | 0<br>.<br>4<br>9      | 0<br>.<br>8<br>4<br>6      | 0.<br>0<br>8<br>3<br>5<br>0<br>8 | 0.<br>02 |  | 1 | 2 | 0 | 20<br>19 | 2<br>0<br>2<br>0 |
| Rh<br>eu<br>ma<br>toi<br>d<br>Ar<br>thr<br>itis | C<br>00<br>03<br>87<br>3 | EP<br>AS<br>1 | 2<br>0<br>3<br>4 | Q998<br>14 | endothel<br>ial PAS<br>domain<br>protein 1                      | Tr<br>ans<br>cri<br>pti<br>on<br>fac<br>tor                  | 29<br>3 | 0<br>.<br>4<br>5<br>4 | 0<br>.<br>7<br>3<br>1      | 0.<br>5<br>9<br>6<br>1           | 0.<br>02 |  | 1 | 2 | 0 | 20<br>03 | 2<br>0<br>1<br>7 |
| Rh<br>eu<br>ma<br>toi<br>d<br>Ar<br>thr<br>itis | C<br>00<br>03<br>87<br>3 | FB<br>L       | 2<br>0<br>9<br>1 | P2208<br>7 | fibrillari<br>n                                                 | En<br>zy<br>me                                               | 94      | 0<br>.<br>5<br>7<br>2 | 0<br>.<br>6<br>5<br>4      | 0.<br>9<br>9<br>3<br>1<br>9      | 0.<br>02 |  | 1 | 2 | 0 | 20<br>19 | 2<br>0<br>2<br>0 |
| Rh<br>eu<br>ma<br>toi<br>d<br>Ar<br>thr<br>itis | C<br>00<br>03<br>87<br>3 | ET<br>S2      | 2<br>1<br>1<br>4 | P1503<br>6 | ETS<br>proto-<br>oncogen<br>e 2,<br>transcrip<br>tion<br>factor | Tr<br>ans<br>cri<br>pti<br>on<br>fac<br>tor                  | 11<br>5 | 0<br>.<br>5<br>4<br>8 | 0<br>.<br>8<br>0<br>8<br>8 | 0.<br>9<br>8<br>8<br>8           | 0.<br>02 |  | 1 | 2 | 0 | 19<br>96 | 2<br>0<br>0<br>1 |
| Rh<br>eu<br>ma<br>toi<br>d<br>Ar<br>thr<br>itis | C<br>00<br>03<br>87<br>3 | F2<br>R       | 2<br>1<br>4<br>9 | P2511<br>6 | coagulat<br>ion<br>factor II<br>thrombi<br>n<br>receptor        | G-<br>pro<br>tei<br>n<br>co<br>upl<br>ed<br>rec<br>ept<br>or | 34<br>7 | 0<br>.<br>4<br>4<br>4 | 0<br>.<br>8<br>4<br>6      | 0.<br>0<br>8<br>4<br>6<br>8      | 0.<br>02 |  | 1 | 2 | 0 | 19<br>95 | 2<br>0<br>1<br>2 |

|                      |          |         |      |        |                                           |           |     |       |       |          |      |  |     |   |   |      |      |
|----------------------|----------|---------|------|--------|-------------------------------------------|-----------|-----|-------|-------|----------|------|--|-----|---|---|------|------|
| Rheumatoid Arthritis | C0003873 | ALDH1A1 | 216  | P00352 | aldehyde dehydrogenase 1 family member A1 | Enzyme    | 270 | 0.46  | 0.846 | 0.9448   | 0.02 |  | 1   | 2 | 0 | 2015 | 2019 |
| Rheumatoid Arthritis | C0003873 | PTK2B   | 2185 | Q14289 | protein tyrosine kinase 2 beta            | Kinase    | 319 | 0.488 | 0.808 | 0.93536  | 0.02 |  | 1   | 2 | 0 | 2007 | 2007 |
| Rheumatoid Arthritis | C0003873 | FCER2   | 2208 | P06734 | Fc fragment of IgE receptor II            | Receptor  | 104 | 0.566 | 0.654 | 7.61E-12 | 0.02 |  | 0.5 | 2 | 0 | 1994 | 2011 |
| Rheumatoid Arthritis | C0003873 | FCN2    | 2220 | Q15485 | ficolin 2                                 | Signaling | 159 | 0.517 | 0.846 | 3.56E-11 | 0.02 |  | 0.5 | 2 | 1 | 2015 | 2016 |
| Rheumatoid Arthritis | C0003873 | FGFB    | 2244 | P02675 | fibrinogen beta chain                     | Signaling | 95  | 0.584 | 0.692 | 0.56616  | 0.02 |  | 1   | 2 | 1 | 2012 | 2017 |
| Rheumatoid Arthritis | C0003873 | FGF1    | 2246 | P05230 | fibroblast growth factor 1                | Signaling | 184 | 0.507 | 0.846 | 0.4406   | 0.02 |  | 1   | 2 | 0 | 1990 | 2001 |
| Rheumatoid Ar        | C0003873 | FGF13   | 2258 | Q92913 | fibroblast growth factor 13               | Signaling | 167 | 0.514 | 0.808 | 0.89489  | 0.02 |  | 1   | 2 | 0 | 2002 | 2003 |

|                                                 |                          |               |                       |            |                                                    |                                             |         |                       |                       |                                  |          |  |   |   |   |          |                  |
|-------------------------------------------------|--------------------------|---------------|-----------------------|------------|----------------------------------------------------|---------------------------------------------|---------|-----------------------|-----------------------|----------------------------------|----------|--|---|---|---|----------|------------------|
| thr<br>itis                                     |                          |               |                       |            |                                                    |                                             |         |                       |                       |                                  |          |  |   |   |   |          |                  |
| Rh<br>eu<br>ma<br>toi<br>d<br>Ar<br>thr<br>itis | C<br>00<br>03<br>87<br>3 | CA<br>SC<br>3 | 2<br>2<br>7<br>9<br>4 | O152<br>34 | CASC3<br>junction<br>complex<br>subunit            | exon                                        | 10      | 0<br>.<br>7<br>9<br>2 | 0<br>.<br>2<br>3<br>1 | 0.<br>6<br>1<br>3<br>3<br>8      | 0.<br>02 |  | 1 | 2 | 0 | 20<br>06 | 2<br>0<br>0<br>8 |
| Rh<br>eu<br>ma<br>toi<br>d<br>Ar<br>thr<br>itis | C<br>00<br>03<br>87<br>3 | CO<br>G2      | 2<br>2<br>7<br>9<br>6 | Q147<br>46 | component of<br>oligomeric<br>golgi complex<br>2   |                                             | 30      | 0<br>.<br>7<br>2<br>9 | 0<br>.<br>4<br>2<br>3 | 9.<br>3<br>7<br>E<br>-<br>0<br>6 | 0.<br>02 |  | 1 | 2 | 0 | 20<br>17 | 2<br>0<br>1<br>8 |
| Rh<br>eu<br>ma<br>toi<br>d<br>Ar<br>thr<br>itis | C<br>00<br>03<br>87<br>3 | FO<br>XO<br>1 | 2<br>3<br>0<br>8      | Q127<br>78 | forkhead<br>O1                                     | box                                         | 38<br>0 | 0<br>.<br>4<br>3<br>3 | 0<br>.<br>8<br>4<br>6 | 0.<br>9<br>9<br>7<br>2<br>5      | 0.<br>02 |  | 1 | 2 | 0 | 20<br>08 | 2<br>0<br>1<br>5 |
| Rh<br>eu<br>ma<br>toi<br>d<br>Ar<br>thr<br>itis | C<br>00<br>03<br>87<br>3 | KD<br>M6<br>B | 2<br>3<br>1<br>3<br>5 | O150<br>54 | lysine<br>demethy<br>lase 6B                       | Ep<br>ige<br>net<br>ic<br>reg<br>ula<br>tor | 17<br>3 | 0<br>.<br>5<br>1<br>4 | 0<br>.<br>8<br>0<br>8 | 1                                | 0.<br>02 |  | 1 | 2 | 0 | 20<br>18 | 2<br>0<br>1<br>9 |
| Rh<br>eu<br>ma<br>toi<br>d<br>Ar<br>thr<br>itis | C<br>00<br>03<br>87<br>3 | FL<br>T4      | 2<br>3<br>2<br>4      | P3591<br>6 | fms<br>related<br>receptor<br>tyrosine<br>kinase 4 | Ki<br>nas<br>e                              | 30<br>6 | 0<br>.<br>4<br>5<br>7 | 0<br>.<br>8<br>0<br>8 | 1                                | 0.<br>02 |  | 1 | 2 | 0 | 20<br>02 | 2<br>0<br>1<br>8 |
| Rh<br>eu<br>ma<br>toi<br>d<br>Ar<br>thr<br>itis | C<br>00<br>03<br>87<br>3 | BR<br>D4      | 2<br>3<br>4<br>7<br>6 | O608<br>85 | bromod<br>omain<br>containi<br>ng 4                | Ep<br>ige<br>net<br>ic<br>reg<br>ula<br>tor | 33<br>5 | 0<br>.<br>4<br>4<br>6 | 0<br>.<br>8<br>8<br>5 | 1                                | 0.<br>02 |  | 1 | 2 | 0 | 20<br>15 | 2<br>0<br>1<br>6 |
| Rh<br>eu<br>ma<br>toi                           | C<br>00<br>03            | AL<br>PP      | 2<br>5<br>0           | P0518<br>7 | alkaline<br>phospha<br>tase,                       | En<br>zy<br>me                              | 20<br>9 | 0<br>.<br>4           | 0<br>.<br>8           | 1.<br>8<br>1<br>E                | 0.<br>02 |  | 1 | 2 | 0 | 20<br>03 | 2<br>0<br>1<br>9 |

|                                                 |                          |                 |                            |            |                                                                 |                                                    |                       |                       |                                  |                             |          |   |   |   |          |                  |                  |
|-------------------------------------------------|--------------------------|-----------------|----------------------------|------------|-----------------------------------------------------------------|----------------------------------------------------|-----------------------|-----------------------|----------------------------------|-----------------------------|----------|---|---|---|----------|------------------|------------------|
| d<br>Ar<br>thr<br>itis                          | 87<br>3                  |                 |                            |            | placenta<br>l                                                   |                                                    |                       | 8<br>7                | 0<br>8                           | -<br>1<br>3                 |          |   |   |   |          |                  |                  |
| Rh<br>eu<br>ma<br>toi<br>d<br>Ar<br>thr<br>itis | C<br>00<br>03<br>87<br>3 | TM<br>EM<br>158 | 2<br>5<br>9<br>0<br>7      | Q8W<br>Z71 | transmembran<br>e protein 158<br>(gene/pseudog<br>ene)          | 22                                                 | 0<br>.<br>7<br>3<br>6 | 0<br>.<br>3<br>8<br>5 | 0.<br>1<br>4<br>8<br>6<br>2      | 0.<br>02                    |          | 1 | 2 | 0 | 19<br>94 | 1<br>9<br>9<br>6 |                  |
| Rh<br>eu<br>ma<br>toi<br>d<br>Ar<br>thr<br>itis | C<br>00<br>03<br>87<br>3 | AS<br>PM        | 2<br>5<br>9<br>2<br>6<br>6 | Q8IZ<br>T6 | abnormal<br>spindle<br>microtubule<br>assembly                  | 15<br>9                                            | 0<br>.<br>5<br>2<br>6 | 0<br>.<br>7<br>6<br>9 | 3.<br>3<br>5<br>E<br>-<br>4<br>9 | 0.<br>02                    |          | 1 | 2 | 0 | 20<br>04 | 2<br>0<br>1<br>8 |                  |
| Rh<br>eu<br>ma<br>toi<br>d<br>Ar<br>thr<br>itis | C<br>00<br>03<br>87<br>3 | GA<br>PD<br>H   | 2<br>5<br>9<br>7           | P0440<br>6 | glyceral<br>dehyde-<br>3-<br>phospha<br>te<br>dehydro<br>genase | En<br>zy<br>me                                     | 30<br>5               | 0<br>.<br>4<br>4<br>7 | 0<br>.<br>8<br>0<br>8            | 0.<br>1<br>1<br>3<br>8<br>8 | 0.<br>02 |   | 1 | 2 | 0        | 20<br>07         | 2<br>0<br>1<br>9 |
| Rh<br>eu<br>ma<br>toi<br>d<br>Ar<br>thr<br>itis | C<br>00<br>03<br>87<br>3 | AT<br>RN<br>L1  | 2<br>6<br>0<br>3<br>3      | Q5V<br>V63 | attractin<br>like 1                                             | En<br>zy<br>me<br>mo<br>dul<br>ato<br>r            | 11<br>7               | 0<br>.<br>5<br>4<br>6 | 0<br>.<br>7<br>6<br>9            | 0.<br>9<br>9<br>1<br>5      | 0.<br>02 |   | 1 | 2 | 0        | 20<br>03         | 2<br>0<br>1<br>9 |
| Rh<br>eu<br>ma<br>toi<br>d<br>Ar<br>thr<br>itis | C<br>00<br>03<br>87<br>3 | GA<br>S6        | 2<br>6<br>2<br>1           | Q143<br>93 | growth<br>arrest<br>specific<br>6                               | Ex<br>tra<br>cel<br>lul<br>ar<br>str<br>uct<br>ure | 19<br>0               | 0<br>.<br>5           | 0<br>.<br>7<br>6<br>9            | 0.<br>0<br>3<br>4<br>7<br>7 | 0.<br>02 |   | 1 | 2 | 0        | 19<br>99         | 2<br>0<br>1<br>7 |
| Rh<br>eu<br>ma<br>toi<br>d<br>Ar<br>thr<br>itis | C<br>00<br>03<br>87<br>3 | HS<br>PB<br>8   | 2<br>6<br>3<br>5<br>3      | Q9UJ<br>Y1 | heat shock<br>protein family<br>B (small)<br>member 8           | 12<br>2                                            | 0<br>.<br>5<br>7      | 0<br>.<br>5<br>7<br>7 | 0.<br>0<br>4<br>3<br>1<br>2<br>8 | 0.<br>02                    |          | 1 | 2 | 0 | 20<br>06 | 2<br>0<br>0<br>8 |                  |

|                      |          |         |       |        |                                                                                     |                    |     |      |      |          |      |  |     |   |   |      |      |
|----------------------|----------|---------|-------|--------|-------------------------------------------------------------------------------------|--------------------|-----|------|------|----------|------|--|-----|---|---|------|------|
| Rheumatoid Arthritis | C0003873 | GH1     | 2688  | P01241 | growth hormone 1                                                                    | Signaling          | 686 | 0373 | 033  | 0.03057  | 0.02 |  | 1   | 2 | 0 | 2006 | 2010 |
| Rheumatoid Arthritis | C0003873 | CB LIF  | 2694  | P27352 | cobalamin binding intrinsic factor                                                  |                    | 185 | 057  | 088  | 0.000249 | 0.02 |  | 1   | 2 | 0 | 2017 | 2019 |
| Rheumatoid Arthritis | C0003873 | LA MP3  | 27074 | Q9UQV4 | lysosomal associated membrane protein 3                                             | Transporter        | 104 | 056  | 062  | 0.000267 | 0.02 |  | 0.5 | 2 | 0 | 2003 | 2008 |
| Rheumatoid Arthritis | C0003873 | HP LH1  | 27259 |        | hemophagocytic lymphohistiocytosis 1                                                |                    | 22  | 0655 | 0538 |          | 0.02 |  | 1   | 2 | 0 | 2000 | 2003 |
| Rheumatoid Arthritis | C0003873 | PD LIM3 | 27295 | Q53GG5 | PDZ and LIM domain 3                                                                | Cellular structure | 118 | 0547 | 0739 | 3.03E-07 | 0.02 |  | 1   | 2 | 0 | 2003 | 2019 |
| Rheumatoid Arthritis | C0003873 | ABO     | 28    | P16442 | ABO, alpha 1-3-N-acetylglactosaminyltransferase and alpha 1-3-galactosyltransferase | Enzyme             | 443 | 0427 | 0885 |          | 0.02 |  | 1   | 2 | 0 | 1982 | 1987 |

|                      |          |           |        |        |                                                                      |                            |     |       |       |          |      |  |     |   |   |      |      |
|----------------------|----------|-----------|--------|--------|----------------------------------------------------------------------|----------------------------|-----|-------|-------|----------|------|--|-----|---|---|------|------|
| Rheumatoid Arthritis | C0003873 | CCR10     | 2826   | P46092 | C-C motif chemokine receptor 10                                      | G-protein coupled receptor | 57  | 0.626 | 0.645 | 0.005    | 0.02 |  | 1   | 2 | 0 | 2015 | 2018 |
| Rheumatoid Arthritis | C0003873 | GPRI5     | 2838   | P49685 | G protein-coupled receptor 15                                        | G-protein coupled receptor | 18  | 0.743 | 0.308 | 1.11E-06 | 0.02 |  | 1   | 2 | 0 | 2014 | 2018 |
| Rheumatoid Arthritis | C0003873 | VSTM1     | 284415 | Q6UX27 | V-set and transmembrane domain containing 1                          | Receptor                   | 8   | 0.821 | 0.192 | 6.37E-08 | 0.02 |  | 1   | 2 | 0 | 2014 | 2016 |
| Rheumatoid Arthritis | C0003873 | DLL1      | 28514  | O00548 | delta like canonical Notch ligand 1                                  |                            | 212 | 0.492 | 0.809 | 0.999    | 0.02 |  | 1   | 2 | 0 | 1990 | 2005 |
| Rheumatoid Arthritis | C0003873 | TRAV29DV5 | 28653  | P04437 | T cell receptor alpha variable 29/delta variable 5 (gene/pseudogene) |                            | 14  | 0.751 | 0.346 |          | 0.02 |  | 0.5 | 2 | 0 | 1997 | 1997 |
| Rheumatoid Arthritis | C0003873 | GPRI42    | 28666  | O15529 | G protein-coupled receptor 42 (gene/pseudogene)                      | G-protein coupled receptor | 255 | 0.475 | 0.846 | 0.059    | 0.02 |  | 1   | 2 | 0 | 1999 | 2004 |



|                      |          |        |       |        |                                                           |                      |     |       |        |          |      |  |     |   |   |      |      |
|----------------------|----------|--------|-------|--------|-----------------------------------------------------------|----------------------|-----|-------|--------|----------|------|--|-----|---|---|------|------|
| Rheumatoid Arthritis | C0003873 | TRAJ60 | 28695 |        | T cell receptor alpha joining 60 (pseudogene)             |                      | 14  | 0.751 | 0.346  |          | 0.02 |  | 0.5 | 2 | 0 | 1997 | 1997 |
| Rheumatoid Arthritis | C0003873 | TRAC   | 28755 | P01848 | T cell receptor alpha constant                            | Receptor             | 28  | 0.691 | 0.615  |          | 0.02 |  | 0.5 | 2 | 0 | 1997 | 1997 |
| Rheumatoid Arthritis | C0003873 | GPX1   | 2876  | P07203 | glutathione peroxidase 1                                  | Enzyme               | 290 | 0.458 | 0.923  | 3.85E-05 | 0.02 |  | 1   | 2 | 0 | 2019 | 2019 |
| Rheumatoid Arthritis | C0003873 | ANPEP  | 2990  | P15144 | alanyl aminopeptidase, membrane                           | Enzyme               | 280 | 0.462 | 0.769  | 3.75E-09 | 0.02 |  | 1   | 2 | 0 | 2002 | 2019 |
| Rheumatoid Arthritis | C0003873 | SETD2  | 29072 | Q9BYW2 | SET domain containing 2, histone lysine methyltransferase | Epigenetic regulator | 447 | 0.424 | 0.846  | 1        | 0.02 |  | 1   | 2 | 0 | 2009 | 2018 |
| Rheumatoid Arthritis | C0003873 | GRP    | 29922 | P07492 | gastrin releasing peptide                                 |                      | 172 | 0.524 | 0.769  | 0.02535  | 0.02 |  | 1   | 2 | 0 | 2008 | 2017 |
| Rheumatoid Arthritis | C0003873 | GSK3B  | 2932  | P49841 | glycogen synthase kinase 3 beta                           | Kinase               | 393 | 0.43  | 0.8456 | 0.95     | 0.02 |  | 1   | 2 | 0 | 2011 | 2018 |

|                                                 |                          |                     |                       |            |                                                  |                                                |         |                       |                       |                                  |          |  |   |   |   |          |                  |
|-------------------------------------------------|--------------------------|---------------------|-----------------------|------------|--------------------------------------------------|------------------------------------------------|---------|-----------------------|-----------------------|----------------------------------|----------|--|---|---|---|----------|------------------|
| Ar<br>thr<br>itis                               |                          |                     |                       |            |                                                  |                                                |         |                       |                       | 7<br>1                           |          |  |   |   |   |          |                  |
| Rh<br>eu<br>ma<br>toi<br>d<br>Ar<br>thr<br>itis | C<br>00<br>03<br>87<br>3 | MS<br>H6            | 2<br>9<br>5<br>6      | P5270<br>1 | mutS<br>homolog<br>6                             | Nu<br>cle<br>ic<br>aci<br>d<br>bin<br>din<br>g | 29<br>6 | 0<br>.<br>4<br>6<br>2 | 0<br>.<br>7<br>3<br>1 | 3.<br>6<br>7<br>E<br>-<br>0<br>5 | 0.<br>02 |  | 1 | 2 | 0 | 20<br>03 | 2<br>0<br>0<br>3 |
| Rh<br>eu<br>ma<br>toi<br>d<br>Ar<br>thr<br>itis | C<br>00<br>03<br>87<br>3 | SE<br>NP<br>1       | 2<br>9<br>8<br>4<br>3 | Q9P0<br>U3 | SUMO<br>specific<br>peptidas<br>e 1              | En<br>zy<br>me                                 | 79      | 0<br>.<br>5<br>9<br>3 | 0<br>.<br>6<br>5<br>4 | 0.<br>9<br>9<br>3<br>5<br>8      | 0.<br>02 |  | 1 | 2 | 0 | 20<br>07 | 2<br>0<br>1<br>0 |
| Rh<br>eu<br>ma<br>toi<br>d<br>Ar<br>thr<br>itis | C<br>00<br>03<br>87<br>3 | A1<br>CF            | 2<br>9<br>9<br>7<br>4 | Q9N<br>Q94 | APOBEC1<br>complementat<br>ion factor            |                                                | 71      | 0<br>.<br>6<br>0<br>4 | 0<br>.<br>6<br>9<br>2 | 5.<br>9<br>2<br>E<br>-<br>1<br>0 | 0.<br>02 |  | 1 | 2 | 0 | 20<br>04 | 2<br>0<br>1<br>8 |
| Rh<br>eu<br>ma<br>toi<br>d<br>Ar<br>thr<br>itis | C<br>00<br>03<br>87<br>3 | TB<br>X2<br>1       | 3<br>0<br>0<br>0<br>9 | Q9UL<br>17 | T-box<br>transcrip<br>tion<br>factor 21          | Tr<br>ans<br>cri<br>pti<br>on<br>fac<br>tor    | 12<br>4 | 0<br>.<br>5<br>4<br>1 | 0<br>.<br>8<br>0<br>8 | 0.<br>9<br>9<br>6<br>3<br>6      | 0.<br>02 |  | 1 | 2 | 1 | 20<br>09 | 2<br>0<br>1<br>9 |
| Rh<br>eu<br>ma<br>toi<br>d<br>Ar<br>thr<br>itis | C<br>00<br>03<br>87<br>3 | SL<br>C4<br>0A<br>1 | 3<br>0<br>0<br>6<br>1 | Q9NP<br>59 | solute<br>carrier<br>family<br>40<br>member<br>1 | Tr<br>ans<br>por<br>ter                        | 10<br>1 | 0<br>.<br>5<br>7      | 0<br>.<br>7<br>3<br>1 | 0.<br>9<br>8<br>8<br>3<br>5      | 0.<br>02 |  | 1 | 2 | 0 | 20<br>18 | 2<br>0<br>1<br>9 |
| Rh<br>eu<br>ma<br>toi<br>d<br>Ar<br>thr<br>itis | C<br>00<br>03<br>87<br>3 | HD<br>AC<br>1       | 3<br>0<br>6<br>5      | Q135<br>47 | histone<br>deacetyl<br>ase 1                     | Ep<br>ige<br>net<br>ic<br>reg<br>ula<br>tor    | 27<br>7 | 0<br>.<br>4<br>6      | 0<br>.<br>8<br>4<br>6 | 0.<br>6<br>1<br>4<br>2<br>7      | 0.<br>02 |  | 1 | 2 | 0 | 20<br>10 | 2<br>0<br>1<br>5 |
| Rh<br>eu<br>ma                                  | C<br>00<br>03            | HD<br>GF            | 3<br>0                | P5185<br>8 | heparin<br>binding                               | Sig<br>nal<br>ing                              | 89      | 0<br>.<br>5           | 0<br>.<br>6           | 0.<br>2<br>7                     | 0.<br>02 |  | 1 | 2 | 0 | 19<br>90 | 2<br>0           |

|                                                 |                          |                |                       |            |                                                                  |                                                              |         |                       |                       |                                  |          |  |         |   |   |          |                  |
|-------------------------------------------------|--------------------------|----------------|-----------------------|------------|------------------------------------------------------------------|--------------------------------------------------------------|---------|-----------------------|-----------------------|----------------------------------|----------|--|---------|---|---|----------|------------------|
| to<br>id<br>Ar<br>thr<br>itis                   | 87<br>3                  |                | 6<br>8                |            | growth<br>factor                                                 |                                                              |         | 7<br>5                | 5<br>4                | 2<br>7<br>2                      |          |  |         |   |   |          | 0<br>4           |
| Rh<br>eu<br>ma<br>toi<br>d<br>Ar<br>thr<br>itis | C<br>00<br>03<br>87<br>3 | AD<br>GR<br>E2 | 3<br>0<br>8<br>1<br>7 | Q9U<br>HX3 | adhesion<br>G<br>protein-<br>coupled<br>receptor<br>E2           | G-<br>pro<br>tei<br>n<br>co<br>upl<br>ed<br>rec<br>ept<br>or | 86      | 0<br>.<br>5<br>8<br>1 | 0<br>.<br>6<br>1<br>5 | 2.<br>7<br>6<br>E<br>-<br>2<br>8 | 0.<br>02 |  | 1       | 2 | 0 | 20<br>00 | 2<br>0<br>1<br>0 |
| Rh<br>eu<br>ma<br>toi<br>d<br>Ar<br>thr<br>itis | C<br>00<br>03<br>87<br>3 | HG<br>F        | 3<br>0<br>8<br>2      | P1421<br>0 | hepatoc<br>yte<br>growth<br>factor                               | En<br>zy<br>me                                               | 67<br>1 | 0<br>.<br>3<br>7<br>4 | 0<br>.<br>8<br>8<br>5 | 0.<br>9<br>9<br>9<br>4<br>7      | 0.<br>02 |  | 1       | 2 | 0 | 19<br>97 | 2<br>0<br>0<br>1 |
| Rh<br>eu<br>ma<br>toi<br>d<br>Ar<br>thr<br>itis | C<br>00<br>03<br>87<br>3 | AN<br>XA<br>6  | 3<br>0<br>9           | P0813<br>3 | annexin A6                                                       |                                                              | 15<br>6 | 0<br>.<br>5<br>1<br>4 | 0<br>.<br>8<br>4<br>6 | 1.<br>0<br>8<br>E<br>-<br>0<br>8 | 0.<br>02 |  | 1       | 2 | 0 | 19<br>98 | 2<br>0<br>1<br>7 |
| Rh<br>eu<br>ma<br>toi<br>d<br>Ar<br>thr<br>itis | C<br>00<br>03<br>87<br>3 | HIP<br>1       | 3<br>0<br>9<br>2      | O002<br>91 | huntingt<br>in<br>interacti<br>ng<br>protein 1                   | Ce<br>llul<br>ar<br>str<br>uct<br>ure                        | 56      | 0<br>.<br>6<br>5<br>3 | 0<br>.<br>5<br>7<br>7 | 0.<br>7<br>6<br>1<br>7<br>3      | 0.<br>02 |  | 1       | 2 | 0 | 20<br>18 | 2<br>0<br>1<br>8 |
| Rh<br>eu<br>ma<br>toi<br>d<br>Ar<br>thr<br>itis | C<br>00<br>03<br>87<br>3 | NR<br>4A<br>1  | 3<br>1<br>6<br>4      | P2273<br>6 | nuclear<br>receptor<br>subfamil<br>y 4<br>group A<br>member<br>1 | Nu<br>cle<br>ar<br>rec<br>ept<br>or                          | 21<br>6 | 0<br>.<br>4<br>9      | 0<br>.<br>7<br>3<br>1 | 0.<br>3<br>7<br>0<br>7<br>4      | 0.<br>02 |  | 1       | 2 | 0 | 20<br>02 | 2<br>0<br>1<br>9 |
| Rh<br>eu<br>ma<br>toi<br>d<br>Ar                | C<br>00<br>03<br>87<br>3 | HR<br>AS       | 3<br>2<br>6<br>5      | P0111<br>2 | HRas<br>proto-<br>oncogen<br>e,<br>GTPase                        | En<br>zy<br>me<br>mo<br>dul<br>ato<br>r                      | 69<br>8 | 0<br>.<br>3<br>7<br>8 | 0<br>.<br>8<br>8<br>5 | 0.<br>0<br>7<br>9<br>7<br>4      | 0.<br>02 |  | 0.<br>5 | 2 | 0 | 19<br>95 | 2<br>0<br>0<br>0 |

|                      |          |          |      |        |                                                  |                      |     |       |        |         |      |  |     |   |   |      |      |
|----------------------|----------|----------|------|--------|--------------------------------------------------|----------------------|-----|-------|--------|---------|------|--|-----|---|---|------|------|
| thritis              |          |          |      |        |                                                  |                      |     |       |        |         |      |  |     |   |   |      |      |
| Rheumatoid Arthritis | C0003873 | HS D11B2 | 3291 | P80365 | hydroxysteroid 11-beta dehydrogenase 2           | Enzyme               | 163 | 0.532 | 0.808  | 0.1177  | 0.02 |  | 1   | 2 | 0 | 2006 | 2015 |
| Rheumatoid Arthritis | C0003873 | HS PA8   | 3312 | P11142 | heat shock protein family A (Hsp70) member 8     |                      | 124 | 0.533 | 0.808  | 0.99863 | 0.02 |  | 0.5 | 2 | 0 | 2002 | 2018 |
| Rheumatoid Arthritis | C0003873 | BI RC5   | 332  | O15392 | baculoviral IAP repeat containing 5              | Enzyme modulator     | 199 | 0.495 | 0.731  | 0.0584  | 0.02 |  | 1   | 2 | 0 | 2007 | 2016 |
| Rheumatoid Arthritis | C0003873 | DN AJ B1 | 3337 | P25685 | DnaJ heat shock protein family (Hsp40) member B1 |                      | 82  | 0.597 | 0.692  | 0.0347  | 0.02 |  | 1   | 2 | 0 | 2019 | 2019 |
| Rheumatoid Arthritis | C0003873 | IC A1    | 3382 | Q05084 | islet cell autoantigen 1                         |                      | 34  | 0.686 | 0.5091 | 0.0091  | 0.02 |  | 1   | 2 | 0 | 1995 | 1999 |
| Rheumatoid Arthritis | C0003873 | ID1      | 3397 | P41134 | inhibitor of DNA binding 1, HLH protein          | Transcription factor | 125 | 0.544 | 0.692  | 0.0031  | 0.02 |  | 1   | 2 | 0 | 2001 | 2019 |
| Rheumatoid           | C0003    | IFN GR1  | 3459 | P15260 | interferon gamma                                 | Receptor             | 153 | 0.5   | 0.6    | 0.015   | 0.02 |  | 0.5 | 2 | 0 | 2006 | 2015 |

|                                                 |                          |                |                  |            |                                                             |                                         |         |                       |                                      |                                  |          |  |   |   |   |          |                  |
|-------------------------------------------------|--------------------------|----------------|------------------|------------|-------------------------------------------------------------|-----------------------------------------|---------|-----------------------|--------------------------------------|----------------------------------|----------|--|---|---|---|----------|------------------|
| d<br>Ar<br>thr<br>itis                          | 87<br>3                  |                |                  |            | receptor<br>1                                               |                                         |         | 2<br>9                | 9<br>2                               | 5<br>0<br>3                      |          |  |   |   |   |          |                  |
| Rh<br>eu<br>ma<br>toi<br>d<br>Ar<br>thr<br>itis | C<br>00<br>03<br>87<br>3 | IGF<br>BP<br>1 | 3<br>4<br>8<br>4 | P0883<br>3 | insulin<br>like<br>growth<br>factor<br>binding<br>protein 1 | En<br>zy<br>me<br>mo<br>dul<br>ato<br>r | 19<br>1 | 0<br>.<br>5<br>0<br>2 | 0<br>.<br>8<br>0<br>8                | 0.<br>0<br>0<br>9<br>4<br>7      | 0.<br>02 |  | 1 | 2 | 0 | 20<br>17 | 2<br>0<br>1<br>8 |
| Rh<br>eu<br>ma<br>toi<br>d<br>Ar<br>thr<br>itis | C<br>00<br>03<br>87<br>3 | IG<br>HA<br>1  | 3<br>4<br>9<br>3 | P0187<br>6 | immunoglobul<br>in heavy<br>constant alpha<br>1             |                                         | 64      | 0<br>.<br>6<br>1<br>7 | 0<br>.<br>6<br>9<br>2                |                                  | 0.<br>02 |  | 1 | 2 | 0 | 19<br>91 | 2<br>0<br>1<br>7 |
| Rh<br>eu<br>ma<br>toi<br>d<br>Ar<br>thr<br>itis | C<br>00<br>03<br>87<br>3 | AP<br>P        | 3<br>5<br>1      | P0506<br>7 | amyloid<br>beta<br>precurs<br>or protein                    | En<br>zy<br>me<br>mo<br>dul<br>ato<br>r | 48<br>5 | 0<br>.<br>4<br>2<br>2 | 0<br>.<br>8<br>4<br>6<br>5<br>4<br>4 | 0.<br>0<br>4<br>6<br>5<br>4<br>4 | 0.<br>02 |  | 1 | 2 | 0 | 20<br>11 | 2<br>0<br>1<br>6 |
| Rh<br>eu<br>ma<br>toi<br>d<br>Ar<br>thr<br>itis | C<br>00<br>03<br>87<br>3 | AP<br>RT       | 3<br>5<br>3      | P0774<br>1 | adenine<br>phosphoribosy<br>ltransferase                    |                                         | 38<br>4 | 0<br>.<br>4<br>2<br>3 | 0<br>.<br>8<br>4<br>6                | 5.<br>4<br>5<br>E<br>-<br>1<br>3 | 0.<br>02 |  | 1 | 2 | 0 | 20<br>18 | 2<br>0<br>1<br>9 |
| Rh<br>eu<br>ma<br>toi<br>d<br>Ar<br>thr<br>itis | C<br>00<br>03<br>87<br>3 | KL<br>K3       | 3<br>5<br>4      | P0728<br>8 | kallikrei<br>n related<br>peptidas<br>e 3                   | En<br>zy<br>me                          | 35<br>8 | 0<br>.<br>4<br>4<br>3 | 0<br>.<br>8<br>8<br>5                | 4.<br>4<br>3<br>E<br>-<br>0<br>6 | 0.<br>02 |  | 1 | 2 | 0 | 19<br>94 | 2<br>0<br>1<br>6 |
| Rh<br>eu<br>ma<br>toi<br>d<br>Ar<br>thr<br>itis | C<br>00<br>03<br>87<br>3 | IL1<br>RA<br>P | 3<br>5<br>5<br>6 | Q9NP<br>H3 | interleuk<br>in 1<br>receptor<br>accessor<br>y protein      | Re<br>ce<br>pto<br>r                    | 49      | 0<br>.<br>6<br>4<br>7 | 0<br>.<br>6<br>5<br>4                | 0.<br>2<br>5<br>8<br>4<br>6      | 0.<br>02 |  | 1 | 2 | 0 | 20<br>19 | 2<br>0<br>2<br>0 |

|                      |          |        |      |        |                                      |           |     |       |       |          |      |  |     |   |   |      |      |
|----------------------|----------|--------|------|--------|--------------------------------------|-----------|-----|-------|-------|----------|------|--|-----|---|---|------|------|
| Rheumatoid Arthritis | C0003873 | IL5RA  | 3568 | Q01344 | interleukin 5 receptor subunit alpha | Signaling | 48  | 0.647 | 0.654 | 2.68E-08 | 0.02 |  | 0.5 | 2 | 0 | 1995 | 1998 |
| Rheumatoid Arthritis | C0003873 | IL9R   | 3581 | Q01113 | interleukin 9 receptor               | Receptor  | 44  | 0.659 | 0.654 | 2.68E-22 | 0.02 |  | 1   | 2 | 1 | 2009 | 2018 |
| Rheumatoid Arthritis | C0003873 | IL10RB | 3588 | Q08334 | interleukin 10 receptor subunit beta | Receptor  | 50  | 0.636 | 0.577 | 2.51E-06 | 0.02 |  | 1   | 2 | 0 | 2006 | 2013 |
| Rheumatoid Arthritis | C0003873 | IL11   | 3589 | P20809 | interleukin 11                       |           | 244 | 0.481 | 0.808 | 0.00318  | 0.02 |  | 1   | 2 | 0 | 2000 | 2018 |
| Rheumatoid Arthritis | C0003873 | IDO1   | 3620 | P14902 | indoleamine 2,3-dioxygenase 1        |           | 295 | 0.454 | 0.846 | 3.3E-06  | 0.02 |  | 1   | 2 | 0 | 2011 | 2017 |
| Rheumatoid Arthritis | C0003873 | INHBA  | 3624 | P08476 | inhibin subunit beta A               | Signaling | 83  | 0.601 | 0.615 | 0.9799   | 0.02 |  | 0.5 | 2 | 0 | 1998 | 2006 |
| Rheumatoid Ar        | C0003873 | INSR   | 3643 | P06213 | insulin receptor                     | Kinase    | 452 | 0.432 | 0.846 | 3.61E-   | 0.02 |  | 1   | 2 | 0 | 2016 | 2017 |

|                                                 |                          |                |                  |            |                                            |                        |         |                       |                       |                                  |          |  |         |   |   |                         |
|-------------------------------------------------|--------------------------|----------------|------------------|------------|--------------------------------------------|------------------------|---------|-----------------------|-----------------------|----------------------------------|----------|--|---------|---|---|-------------------------|
| thr<br>itis                                     |                          |                |                  |            |                                            |                        |         |                       | 0<br>5                |                                  |          |  |         |   |   |                         |
| Rh<br>eu<br>ma<br>toi<br>d<br>Ar<br>thr<br>itis | C<br>00<br>03<br>87<br>3 | INS<br>RR      | 3<br>6<br>4<br>5 | P1461<br>6 | insulin<br>receptor<br>related<br>receptor | Ki<br>nas<br>e         | 18<br>6 | 0<br>.<br>5<br>0<br>8 | 0<br>.<br>8<br>0<br>8 | 5.<br>4<br>E<br>-<br>2<br>4      | 0.<br>02 |  | 1       | 2 | 0 | 20<br>17<br>0<br>1<br>8 |
| Rh<br>eu<br>ma<br>toi<br>d<br>Ar<br>thr<br>itis | C<br>00<br>03<br>87<br>3 | AQ<br>P9       | 3<br>6<br>6      | O433<br>15 | aquapori<br>n 9                            | Ion<br>ch<br>an<br>nel | 10<br>0 | 0<br>.<br>5<br>6<br>5 | 0<br>.<br>8<br>0<br>8 | 0.<br>2<br>4<br>0<br>0<br>2<br>7 | 0.<br>02 |  | 1       | 2 | 0 | 20<br>16<br>0<br>1<br>7 |
| Rh<br>eu<br>ma<br>toi<br>d<br>Ar<br>thr<br>itis | C<br>00<br>03<br>87<br>3 | IT<br>GA<br>2  | 3<br>6<br>7<br>3 | P1730<br>1 | integrin<br>subunit alpha<br>2             |                        | 16<br>6 | 0<br>.<br>5<br>2<br>2 | 0<br>.<br>7<br>3<br>1 | 6.<br>2<br>8<br>E<br>-<br>1<br>1 | 0.<br>02 |  | 0.<br>5 | 2 | 0 | 20<br>09<br>0<br>1<br>8 |
| Rh<br>eu<br>ma<br>toi<br>d<br>Ar<br>thr<br>itis | C<br>00<br>03<br>87<br>3 | IT<br>GA<br>E  | 3<br>6<br>8<br>2 | P3857<br>0 | integrin<br>subunit alpha<br>E             |                        | 95      | 0<br>.<br>5<br>7<br>9 | 0<br>.<br>6<br>9<br>2 | 3.<br>9<br>2<br>E<br>-<br>2<br>0 | 0.<br>02 |  | 1       | 2 | 0 | 20<br>17<br>0<br>1<br>9 |
| Rh<br>eu<br>ma<br>toi<br>d<br>Ar<br>thr<br>itis | C<br>00<br>03<br>87<br>3 | IT<br>GA<br>X  | 3<br>6<br>8<br>7 | P2070<br>2 | integrin<br>subunit alpha<br>X             |                        | 17<br>0 | 0<br>.<br>5<br>0<br>4 | 0<br>.<br>7<br>6<br>9 | 1.<br>3<br>7<br>E<br>-<br>1<br>5 | 0.<br>02 |  | 1       | 2 | 0 | 20<br>10<br>0<br>1<br>2 |
| Rh<br>eu<br>ma<br>toi<br>d<br>Ar<br>thr<br>itis | C<br>00<br>03<br>87<br>3 | AR<br>EG       | 3<br>7<br>4      | P1551<br>4 | amphire<br>gulin                           | Sig<br>nal<br>ing      | 22<br>1 | 0<br>.<br>4<br>8<br>7 | 0<br>.<br>7<br>6<br>9 | 0.<br>3<br>5<br>4<br>0<br>7      | 0.<br>02 |  | 1       | 2 | 0 | 20<br>06<br>0<br>1<br>0 |
| Rh<br>eu<br>ma<br>toi                           | C<br>00<br>03            | KC<br>NM<br>A1 | 3<br>7<br>7<br>8 | Q127<br>91 | potassiu<br>m<br>calcium-<br>activate      | Ion<br>ch<br>an<br>nel | 20<br>5 | 0<br>.<br>5           | 0<br>.<br>8           | 0.<br>9<br>9<br>7                | 0.<br>02 |  | 1       | 2 | 0 | 20<br>17<br>0<br>1<br>8 |

|                                                 |                          |                     |                            |            |                                                                                                                             |                                         |         |                       |                       |                                  |          |  |   |   |   |          |                  |
|-------------------------------------------------|--------------------------|---------------------|----------------------------|------------|-----------------------------------------------------------------------------------------------------------------------------|-----------------------------------------|---------|-----------------------|-----------------------|----------------------------------|----------|--|---|---|---|----------|------------------|
| d<br>Ar<br>thr<br>itis                          | 87<br>3                  |                     |                            |            | d<br>channel<br>subfamil<br>y M<br>alpha 1                                                                                  |                                         |         | 1<br>8                | 4<br>6                | 3<br>1                           |          |  |   |   |   |          |                  |
| Rh<br>eu<br>ma<br>toi<br>d<br>Ar<br>thr<br>itis | C<br>00<br>03<br>87<br>3 | MA<br>LA<br>T1      | 3<br>7<br>8<br>9<br>3<br>8 |            | metastasis<br>associated<br>lung<br>adenocarcino<br>ma transcript 1                                                         |                                         | 33<br>6 | 0<br>.<br>4<br>3<br>5 | 0<br>.<br>8<br>4<br>6 |                                  | 0.<br>02 |  | 1 | 2 | 0 | 20<br>19 | 2<br>0<br>1<br>9 |
| Rh<br>eu<br>ma<br>toi<br>d<br>Ar<br>thr<br>itis | C<br>00<br>03<br>87<br>3 | KI<br>R2<br>DL<br>3 | 3<br>8<br>0<br>4           | P4362<br>8 | killer<br>cell<br>immuno<br>globulin<br>like<br>receptor,<br>two Ig<br>domains<br>and long<br>cytoplas<br>mic tail<br>3     | Re<br>ce<br>pto<br>r                    | 57      | 0<br>.<br>6<br>1<br>2 | 0<br>.<br>6<br>5<br>4 | 2.<br>6<br>8<br>E<br>-<br>0<br>9 | 0.<br>02 |  | 1 | 2 | 0 | 20<br>12 | 2<br>0<br>1<br>5 |
| Rh<br>eu<br>ma<br>toi<br>d<br>Ar<br>thr<br>itis | C<br>00<br>03<br>87<br>3 | KI<br>R2<br>DS<br>5 | 3<br>8<br>1<br>0           | Q149<br>53 | killer<br>cell<br>immuno<br>globulin<br>like<br>receptor,<br>two Ig<br>domains<br>and<br>short<br>cytoplas<br>mic tail<br>5 | Re<br>ce<br>pto<br>r                    | 27      | 0<br>.<br>6<br>7<br>8 | 0<br>.<br>5           |                                  | 0.<br>02 |  | 1 | 2 | 0 | 20<br>10 | 2<br>0<br>1<br>5 |
| Rh<br>eu<br>ma<br>toi<br>d<br>Ar<br>thr<br>itis | C<br>00<br>03<br>87<br>3 | KL<br>K1            | 3<br>8<br>1<br>6           | P0687<br>0 | kallikrei<br>n 1                                                                                                            | En<br>zy<br>me                          | 13<br>2 | 0<br>.<br>5<br>3<br>3 | 0<br>.<br>7<br>6<br>9 | 0.<br>0<br>0<br>0<br>1<br>5<br>3 | 0.<br>02 |  | 1 | 2 | 0 | 20<br>07 | 2<br>0<br>1<br>9 |
| Rh<br>eu<br>ma<br>toi<br>d<br>Ar<br>thr<br>itis | C<br>00<br>03<br>87<br>3 | KN<br>G1            | 3<br>8<br>2<br>7           | P0104<br>2 | kininoge<br>n 1                                                                                                             | En<br>zy<br>me<br>mo<br>dul<br>ato<br>r | 27<br>9 | 0<br>.<br>4<br>8<br>1 | 0<br>.<br>8<br>8<br>5 | 3.<br>2<br>1<br>E<br>-<br>1<br>0 | 0.<br>02 |  | 1 | 2 | 0 | 20<br>17 | 2<br>0<br>1<br>8 |



|                      |          |          |        |               |                                     |             |     |       |       |          |      |  |     |   |   |      |      |
|----------------------|----------|----------|--------|---------------|-------------------------------------|-------------|-----|-------|-------|----------|------|--|-----|---|---|------|------|
| Rheumatoid Arthritis | C0003873 | ARG1     | 383    | P05089        | arginase 1                          | Enzyme      | 273 | 0.476 | 0.846 | 0.0359   | 0.02 |  | 1   | 2 | 0 | 2013 | 2020 |
| Rheumatoid Arthritis | C0003873 | KPNA1    | 3836   | P52294        | karyopherin subunit alpha 1         | Transporter | 22  | 0.736 | 0.577 | 0.99818  | 0.02 |  | 1   | 2 | 0 | 2008 | 2008 |
| Rheumatoid Arthritis | C0003873 | CCCL4L1  | 388372 | P13236;Q8NHW4 | C-C motif chemokine ligand 4 like 1 |             | 135 | 0.534 | 0.835 | 0.3376   | 0.02 |  | 1   | 2 | 0 | 1994 | 1995 |
| Rheumatoid Arthritis | C0003873 | LDLR     | 3949   | P01130        | low density lipoprotein receptor    |             | 336 | 0.449 | 0.885 | 9.84E-24 | 0.02 |  | 1   | 2 | 0 | 2013 | 2017 |
| Rheumatoid Arthritis | C0003873 | LGALS2   | 3957   | P05162        | galectin 2                          | Signaling   | 27  | 0.7   | 0.385 | 0.02219  | 0.02 |  | 0.5 | 2 | 0 | 2008 | 2009 |
| Rheumatoid Arthritis | C0003873 | LGALS3BP | 3959   | Q08380        | galectin binding protein            | 3           | 127 | 0.546 | 0.769 | 2.68E-07 | 0.02 |  | 1   | 2 | 0 | 2000 | 2003 |
| Rheumatoid Ar        | C0003873 | LGALS8   | 3964   | O00214        | galectin 8                          | Signaling   | 51  | 0.628 | 0.615 | 3.88E-   | 0.02 |  | 1   | 2 | 1 | 2009 | 2012 |

|                                                 |                          |                |                            |            |                                                            |         |                       |                       |                                  |          |  |   |   |   |          |                  |  |
|-------------------------------------------------|--------------------------|----------------|----------------------------|------------|------------------------------------------------------------|---------|-----------------------|-----------------------|----------------------------------|----------|--|---|---|---|----------|------------------|--|
| thr<br>itis                                     |                          |                |                            |            |                                                            |         |                       |                       | 0<br>6                           |          |  |   |   |   |          |                  |  |
| Rh<br>eu<br>ma<br>toi<br>d<br>Ar<br>thr<br>itis | C<br>00<br>03<br>87<br>3 | LI<br>G4       | 3<br>9<br>8<br>1           | P4991<br>7 | DNA ligase 4                                               | 29<br>3 | 0<br>.<br>4<br>7<br>8 | 0<br>.<br>8<br>4<br>6 | 4.<br>1<br>6<br>E<br>-<br>0<br>6 | 0.<br>02 |  | 1 | 2 | 0 | 20<br>03 | 2<br>0<br>0<br>9 |  |
| Rh<br>eu<br>ma<br>toi<br>d<br>Ar<br>thr<br>itis | C<br>00<br>03<br>87<br>3 | LR<br>PA<br>P1 | 4<br>0<br>4<br>3           | P3053<br>3 | LDL receptor<br>related protein<br>associated<br>protein 1 | 95      | 0<br>.<br>5<br>7<br>9 | 0<br>.<br>7<br>3<br>1 | 4.<br>5<br>E<br>-<br>0<br>7      | 0.<br>02 |  | 1 | 2 | 0 | 20<br>03 | 2<br>0<br>0<br>3 |  |
| Rh<br>eu<br>ma<br>toi<br>d<br>Ar<br>thr<br>itis | C<br>00<br>03<br>87<br>3 | SH<br>2D<br>1A | 4<br>0<br>6<br>8           | O608<br>80 | SH2 domain<br>containing 1A                                | 16<br>0 | 0<br>.<br>5<br>2<br>5 | 0<br>.<br>7<br>3<br>1 | 0.<br>3<br>8<br>9<br>3<br>5      | 0.<br>02 |  | 1 | 2 | 0 | 20<br>01 | 2<br>0<br>1<br>6 |  |
| Rh<br>eu<br>ma<br>toi<br>d<br>Ar<br>thr<br>itis | C<br>00<br>03<br>87<br>3 | MI<br>R1<br>32 | 4<br>0<br>6<br>9<br>2<br>1 |            | microRNA<br>132                                            | 22<br>2 | 0<br>.<br>4<br>8<br>5 | 0<br>.<br>8<br>4<br>6 |                                  | 0.<br>02 |  | 1 | 2 | 0 | 20<br>08 | 2<br>0<br>1<br>9 |  |
| Rh<br>eu<br>ma<br>toi<br>d<br>Ar<br>thr<br>itis | C<br>00<br>03<br>87<br>3 | MI<br>R1<br>52 | 4<br>0<br>6<br>9<br>4<br>3 |            | microRNA<br>152                                            | 13<br>6 | 0<br>.<br>5<br>2<br>1 | 0<br>.<br>7<br>6<br>9 |                                  | 0.<br>02 |  | 1 | 2 | 0 | 20<br>14 | 2<br>0<br>1<br>8 |  |
| Rh<br>eu<br>ma<br>toi<br>d<br>Ar<br>thr<br>itis | C<br>00<br>03<br>87<br>3 | MI<br>R1<br>7  | 4<br>0<br>6<br>9<br>5<br>2 |            | microRNA 17                                                | 27<br>0 | 0<br>.<br>4<br>5<br>9 | 0<br>.<br>8<br>4<br>6 |                                  | 0.<br>02 |  | 1 | 2 | 0 | 20<br>18 | 2<br>0<br>1<br>8 |  |
| Rh<br>eu<br>ma<br>toi                           | C<br>00<br>03            | MI<br>R1<br>92 | 4<br>0<br>6<br>9           |            | microRNA<br>192                                            | 17<br>3 | 0<br>.<br>5           | 0<br>.<br>8           |                                  | 0.<br>02 |  | 1 | 2 | 0 | 20<br>17 | 2<br>0<br>2<br>0 |  |

|                                                 |                          |                |                            |  |                 |         |                       |                       |  |          |  |   |   |   |          |                  |
|-------------------------------------------------|--------------------------|----------------|----------------------------|--|-----------------|---------|-----------------------|-----------------------|--|----------|--|---|---|---|----------|------------------|
| d<br>Ar<br>thr<br>itis                          | 87<br>3                  |                | 6<br>7                     |  |                 |         | 0<br>3                | 4<br>6                |  |          |  |   |   |   |          |                  |
| Rh<br>eu<br>ma<br>toi<br>d<br>Ar<br>thr<br>itis | C<br>00<br>03<br>87<br>3 | MI<br>R2<br>10 | 4<br>0<br>6<br>9<br>9<br>2 |  | microRNA<br>210 | 27<br>7 | 0<br>.<br>4<br>6      | 0<br>.<br>8<br>4<br>6 |  | 0.<br>02 |  | 1 | 2 | 0 | 20<br>17 | 2<br>0<br>1<br>8 |
| Rh<br>eu<br>ma<br>toi<br>d<br>Ar<br>thr<br>itis | C<br>00<br>03<br>87<br>3 | MI<br>R2<br>14 | 4<br>0<br>6<br>9<br>9<br>6 |  | microRNA<br>214 | 22<br>1 | 0<br>.<br>4<br>8      | 0<br>.<br>8<br>0<br>8 |  | 0.<br>02 |  | 1 | 2 | 0 | 20<br>17 | 2<br>0<br>1<br>9 |
| Rh<br>eu<br>ma<br>toi<br>d<br>Ar<br>thr<br>itis | C<br>00<br>03<br>87<br>3 | MI<br>R2<br>22 | 4<br>0<br>7<br>0<br>0<br>7 |  | microRNA<br>222 | 21<br>0 | 0<br>.<br>4<br>8<br>6 | 0<br>.<br>8<br>0<br>8 |  | 0.<br>02 |  | 1 | 2 | 0 | 20<br>19 | 2<br>0<br>1<br>9 |
| Rh<br>eu<br>ma<br>toi<br>d<br>Ar<br>thr<br>itis | C<br>00<br>03<br>87<br>3 | MI<br>R2<br>9A | 4<br>0<br>7<br>0<br>2<br>1 |  | microRNA<br>29a | 27<br>8 | 0<br>.<br>4<br>5<br>9 | 0<br>.<br>8<br>0<br>8 |  | 0.<br>02 |  | 1 | 2 | 0 | 20<br>14 | 2<br>0<br>1<br>7 |
| Rh<br>eu<br>ma<br>toi<br>d<br>Ar<br>thr<br>itis | C<br>00<br>03<br>87<br>3 | MI<br>R3<br>0A | 4<br>0<br>7<br>0<br>2<br>9 |  | microRNA<br>30a | 21<br>8 | 0<br>.<br>4<br>7<br>8 | 0<br>.<br>8<br>0<br>8 |  | 0.<br>02 |  | 1 | 2 | 0 | 20<br>13 | 2<br>0<br>1<br>4 |
| Rh<br>eu<br>ma<br>toi<br>d<br>Ar<br>thr<br>itis | C<br>00<br>03<br>87<br>3 | MI<br>R9<br>8  | 4<br>0<br>7<br>0<br>5<br>4 |  | microRNA 98     | 10<br>4 | 0<br>.<br>5<br>6<br>5 | 0<br>.<br>7<br>3<br>1 |  | 0.<br>02 |  | 1 | 2 | 0 | 20<br>16 | 2<br>0<br>1<br>9 |

|                      |          |       |      |        |                                              |                         |     |       |          |      |  |   |   |   |      |      |
|----------------------|----------|-------|------|--------|----------------------------------------------|-------------------------|-----|-------|----------|------|--|---|---|---|------|------|
| Rheumatoid Arthritis | C0003873 | SMAD7 | 4092 | O15105 | SMAD family member 7                         | Transcription factor    | 269 | 0.479 | 0.54854  | 0.02 |  | 1 | 2 | 0 | 2016 | 2018 |
| Rheumatoid Arthritis | C0003873 | MCAM  | 4162 | P43121 | melanoma cell adhesion molecule              | Cell adhesion           | 169 | 0.514 | 0.73116  | 0.02 |  | 1 | 2 | 0 | 1999 | 2015 |
| Rheumatoid Arthritis | C0003873 | MET   | 4233 | P08581 | MET proto-oncogene, receptor tyrosine kinase | Kinase                  | 594 | 0.388 | 0.9698   | 0.02 |  | 1 | 2 | 0 | 2001 | 2019 |
| Rheumatoid Arthritis | C0003873 | MFAP1 | 4236 | P55081 | microfibril associated protein 1             | Extracellular structure | 357 | 0.431 | 0.84602  | 0.02 |  | 1 | 2 | 0 | 2018 | 2019 |
| Rheumatoid Arthritis | C0003873 | MFAP4 | 4239 | P55083 | microfibril associated protein 4             | Signaling               | 31  | 0.691 | 0.46416  | 0.02 |  | 1 | 2 | 0 | 2019 | 2020 |
| Rheumatoid Arthritis | C0003873 | MKI67 | 4288 | P46013 | marker of proliferation Ki-67                |                         | 351 | 0.431 | 0.86E-28 | 0.02 |  | 1 | 2 | 0 | 2001 | 2002 |
| Rheumatoid Ar        | C0003873 | ASIP  | 434  | P42127 | agouti signaling protein                     | Signaling               | 89  | 0.584 | 0.6962   | 0.02 |  | 1 | 2 | 0 | 2004 | 2018 |

|                                                 |                          |                |                            |            |                                                                |                                         |         |                       |                       |                                  |          |  |         |   |   |          |                  |
|-------------------------------------------------|--------------------------|----------------|----------------------------|------------|----------------------------------------------------------------|-----------------------------------------|---------|-----------------------|-----------------------|----------------------------------|----------|--|---------|---|---|----------|------------------|
| thr<br>itis                                     |                          |                |                            |            |                                                                |                                         |         |                       | 9<br>8                |                                  |          |  |         |   |   |          |                  |
| Rh<br>eu<br>ma<br>toi<br>d<br>Ar<br>thr<br>itis | C<br>00<br>03<br>87<br>3 | MO<br>G        | 4<br>3<br>4<br>0           | Q166<br>53 | myelin<br>oligoden<br>drocyte<br>glycopro<br>tein              | En<br>zy<br>me<br>mo<br>dul<br>ato<br>r | 13<br>6 | 0<br>.<br>5<br>4<br>6 | 0<br>.<br>7<br>3<br>1 | 0.<br>1<br>3<br>7<br>4<br>8      | 0.<br>02 |  | 1       | 2 | 0 | 20<br>11 | 2<br>0<br>1<br>7 |
| Rh<br>eu<br>ma<br>toi<br>d<br>Ar<br>thr<br>itis | C<br>00<br>03<br>87<br>3 | MR<br>C1       | 4<br>3<br>6<br>0           | P2289<br>7 | mannose<br>receptor<br>type 1                                  | C-                                      | 43<br>1 | 0<br>.<br>4<br>1<br>3 | 0<br>.<br>8<br>4<br>6 | 0.<br>9<br>4<br>3<br>3<br>5      | 0.<br>02 |  | 1       | 2 | 0 | 20<br>03 | 2<br>0<br>1<br>7 |
| Rh<br>eu<br>ma<br>toi<br>d<br>Ar<br>thr<br>itis | C<br>00<br>03<br>87<br>3 | MR<br>E11      | 4<br>3<br>6<br>1           | P4995<br>9 | MRE11<br>homolog,<br>double strand<br>break repair<br>nuclease |                                         | 17<br>1 | 0<br>.<br>5<br>2<br>7 | 0<br>.<br>8<br>0<br>8 | 1.<br>2<br>6<br>E<br>-<br>1<br>2 | 0.<br>02 |  | 1       | 2 | 0 | 20<br>09 | 2<br>0<br>1<br>9 |
| Rh<br>eu<br>ma<br>toi<br>d<br>Ar<br>thr<br>itis | C<br>00<br>03<br>87<br>3 | ZF<br>AS<br>1  | 4<br>4<br>1<br>9<br>5<br>1 |            | ZNFX1<br>antisense<br>RNA 1                                    |                                         | 82      | 0<br>.<br>5<br>8<br>2 | 0<br>.<br>6<br>1<br>5 |                                  | 0.<br>02 |  | 0.<br>5 | 2 | 0 | 20<br>18 | 2<br>0<br>1<br>9 |
| Rh<br>eu<br>ma<br>toi<br>d<br>Ar<br>thr<br>itis | C<br>00<br>03<br>87<br>3 | MI<br>R3<br>46 | 4<br>4<br>2<br>9<br>1<br>1 |            | microRNA<br>346                                                |                                         | 52      | 0<br>.<br>6<br>3<br>1 | 0<br>.<br>6<br>1<br>5 |                                  | 0.<br>02 |  | 1       | 2 | 0 | 20<br>09 | 2<br>0<br>1<br>1 |
| Rh<br>eu<br>ma<br>toi<br>d<br>Ar<br>thr<br>itis | C<br>00<br>03<br>87<br>3 | AS<br>PA       | 4<br>4<br>3                | P4538<br>1 | aspartoacylase                                                 |                                         | 12<br>3 | 0<br>.<br>5<br>6<br>4 | 0<br>.<br>7<br>3<br>1 | 0.<br>0<br>0<br>4<br>1<br>1      | 0.<br>02 |  | 1       | 2 | 0 | 20<br>04 | 2<br>0<br>1<br>8 |
| Rh<br>eu<br>ma<br>toi                           | C<br>00<br>03            | MS<br>T1       | 4<br>4<br>8<br>5           | P2692<br>7 | macroph<br>age<br>stimulati<br>ng 1                            | En<br>zy<br>me                          | 28<br>1 | 0<br>.<br>4           | 0<br>.<br>8           | 4.<br>7<br>8<br>E                | 0.<br>02 |  | 1       | 2 | 0 | 20<br>15 | 2<br>0<br>1<br>7 |

|                                                 |                          |               |                  |            |                                                                      |                   |         |                       |                       |                                  |          |  |   |   |   |          |                  |
|-------------------------------------------------|--------------------------|---------------|------------------|------------|----------------------------------------------------------------------|-------------------|---------|-----------------------|-----------------------|----------------------------------|----------|--|---|---|---|----------|------------------|
| d<br>Ar<br>thr<br>itis                          | 87<br>3                  |               |                  |            |                                                                      |                   |         | 6<br>5                | 8<br>5                | -<br>1<br>9                      |          |  |   |   |   |          |                  |
| Rh<br>eu<br>ma<br>toi<br>d<br>Ar<br>thr<br>itis | C<br>00<br>03<br>87<br>3 | CO<br>X1      | 4<br>5<br>1<br>2 | P0039<br>5 | cytochro<br>me c<br>oxidase<br>subunit I                             | En<br>zy<br>me    | 42<br>1 | 0<br>.<br>4<br>4<br>1 | 0<br>.<br>8<br>8<br>5 |                                  | 0.<br>02 |  | 1 | 2 | 0 | 19<br>94 | 2<br>0<br>0<br>2 |
| Rh<br>eu<br>ma<br>toi<br>d<br>Ar<br>thr<br>itis | C<br>00<br>03<br>87<br>3 | MU<br>TY<br>H | 4<br>5<br>9<br>5 | Q9UI<br>F7 | mutY<br>DNA<br>glycosyl<br>ase                                       | En<br>zy<br>me    | 15<br>6 | 0<br>.<br>5<br>2<br>1 | 0<br>.<br>7<br>6<br>9 | 1.<br>2<br>6<br>E<br>-<br>1<br>8 | 0.<br>02 |  | 1 | 2 | 2 | 20<br>15 | 2<br>0<br>1<br>7 |
| Rh<br>eu<br>ma<br>toi<br>d<br>Ar<br>thr<br>itis | C<br>00<br>03<br>87<br>3 | MY<br>O9<br>B | 4<br>6<br>5<br>0 | Q134<br>59 | myosin IXB                                                           |                   | 65      | 0<br>.<br>6<br>4<br>4 | 0<br>.<br>6<br>1<br>5 | 1                                | 0.<br>02 |  | 1 | 2 | 2 | 20<br>07 | 2<br>0<br>0<br>8 |
| Rh<br>eu<br>ma<br>toi<br>d<br>Ar<br>thr<br>itis | C<br>00<br>03<br>87<br>3 | AT<br>HS      | 4<br>7<br>0      |            | atherosclerosi<br>s<br>susceptibility<br>(lipoprotein<br>associated) |                   | 11<br>2 | 0<br>.<br>5<br>5<br>1 | 0<br>.<br>7<br>6<br>9 |                                  | 0.<br>02 |  | 1 | 2 | 0 | 20<br>03 | 2<br>0<br>1<br>9 |
| Rh<br>eu<br>ma<br>toi<br>d<br>Ar<br>thr<br>itis | C<br>00<br>03<br>87<br>3 | AT<br>M       | 4<br>7<br>2      | Q133<br>15 | ATM<br>serine/th<br>reonine<br>kinase                                | Ki<br>nas<br>e    | 68<br>4 | 0<br>.<br>3<br>7<br>4 | 0<br>.<br>8<br>8<br>5 | 5.<br>5<br>9<br>E<br>-<br>4<br>7 | 0.<br>02 |  | 1 | 2 | 0 | 20<br>18 | 2<br>0<br>1<br>9 |
| Rh<br>eu<br>ma<br>toi<br>d<br>Ar<br>thr<br>itis | C<br>00<br>03<br>87<br>3 | NG<br>F       | 4<br>8<br>0<br>3 | P0113<br>8 | nerve<br>growth<br>factor                                            | Sig<br>nal<br>ing | 61<br>6 | 0<br>.<br>3<br>9<br>1 | 0<br>.<br>8<br>8<br>5 | 0.<br>8<br>2<br>0<br>2<br>6      | 0.<br>02 |  | 1 | 2 | 0 | 19<br>93 | 2<br>0<br>0<br>9 |

|                      |          |        |      |        |                                          |        |     |       |       |          |      |  |   |   |   |      |      |
|----------------------|----------|--------|------|--------|------------------------------------------|--------|-----|-------|-------|----------|------|--|---|---|---|------|------|
| Rheumatoid Arthritis | C0003873 | NHS    | 4810 | Q6T4R5 | NHS actin remodeling regulator           |        | 295 | 0.466 | 0.849 | 0.999    | 0.02 |  | 1 | 2 | 1 | 2017 | 2019 |
| Rheumatoid Arthritis | C0003873 | NME1   | 4830 | P15531 | NME/NM23 nucleoside diphosphate kinase 1 | Kinase | 329 | 0.443 | 0.808 | 0.03176  | 0.02 |  | 1 | 2 | 0 | 1996 | 2017 |
| Rheumatoid Arthritis | C0003873 | NOS1   | 4842 | P29475 | nitric oxide synthase 1                  |        | 521 | 0.408 | 0.885 | 1        | 0.02 |  | 1 | 2 | 0 | 2009 | 2010 |
| Rheumatoid Arthritis | C0003873 | NOTCH3 | 4854 | Q9UM47 | notch receptor 3                         |        | 418 | 0.435 | 0.808 | 0.4757   | 0.02 |  | 1 | 2 | 0 | 2001 | 2016 |
| Rheumatoid Arthritis | C0003873 | NPAP   | 4878 | P01160 | natriuretic peptide A                    |        | 217 | 0.505 | 0.769 | 0.045    | 0.02 |  | 1 | 2 | 0 | 1993 | 2018 |
| Rheumatoid Arthritis | C0003873 | NT5E   | 4907 | P21589 | 5'-nucleotidase ecto                     | Enzyme | 376 | 0.436 | 0.885 | 2.29E-11 | 0.02 |  | 1 | 2 | 0 | 1999 | 2019 |
| Rheumatoid Ar        | C0003873 | ODC1   | 4953 | P11926 | ornithine decarboxylase 1                | Enzyme | 184 | 0.511 | 0.731 | 0.166    | 0.02 |  | 1 | 2 | 0 | 2000 | 2018 |

|                                                 |                          |               |                       |            |                                                                     |                         |         |                       |                       |                                  |          |  |   |   |   |          |                  |
|-------------------------------------------------|--------------------------|---------------|-----------------------|------------|---------------------------------------------------------------------|-------------------------|---------|-----------------------|-----------------------|----------------------------------|----------|--|---|---|---|----------|------------------|
| thr<br>itis                                     |                          |               |                       |            |                                                                     |                         |         |                       |                       |                                  |          |  |   |   |   |          |                  |
| Rh<br>eu<br>ma<br>toi<br>d<br>Ar<br>thr<br>itis | C<br>00<br>03<br>87<br>3 | OX<br>A1<br>L | 5<br>0<br>1<br>8      | Q150<br>70 | OXA1L<br>mitocho<br>ndrial<br>inner<br>membra<br>ne<br>protein      | Tr<br>ans<br>por<br>ter | 75      | 0<br>.<br>5<br>9      | 0<br>.<br>7<br>3<br>1 | 1.<br>8<br>7<br>E<br>-<br>1<br>0 | 0.<br>02 |  | 1 | 2 | 0 | 20<br>19 | 2<br>0<br>1<br>9 |
| Rh<br>eu<br>ma<br>toi<br>d<br>Ar<br>thr<br>itis | C<br>00<br>03<br>87<br>3 | G0<br>S2      | 5<br>0<br>4<br>8<br>6 | P2746<br>9 | G0/G1 switch<br>2                                                   |                         | 47      | 0<br>.<br>6<br>5<br>6 | 0<br>.<br>4<br>2<br>3 | 0.<br>3<br>7<br>7<br>8<br>8      | 0.<br>02 |  | 1 | 2 | 0 | 20<br>08 | 2<br>0<br>1<br>4 |
| Rh<br>eu<br>ma<br>toi<br>d<br>Ar<br>thr<br>itis | C<br>00<br>03<br>87<br>3 | NO<br>X4      | 5<br>0<br>5<br>0<br>7 | Q9NP<br>H5 | NADPH<br>oxidase<br>4                                               | En<br>zy<br>me          | 26<br>0 | 0<br>.<br>4<br>7<br>1 | 0<br>.<br>8<br>8<br>5 | 5.<br>7<br>6<br>E<br>-<br>2<br>0 | 0.<br>02 |  | 1 | 2 | 0 | 20<br>06 | 2<br>0<br>1<br>9 |
| Rh<br>eu<br>ma<br>toi<br>d<br>Ar<br>thr<br>itis | C<br>00<br>03<br>87<br>3 | PA<br>K1      | 5<br>0<br>5<br>8      | Q131<br>53 | p21<br>(RAC1)<br>activate<br>d kinase<br>1                          | Ki<br>nas<br>e          | 22<br>1 | 0<br>.<br>4<br>9<br>4 | 0<br>.<br>8<br>0<br>8 | 0.<br>0<br>1<br>3<br>3<br>1      | 0.<br>02 |  | 1 | 2 | 0 | 20<br>12 | 2<br>0<br>1<br>9 |
| Rh<br>eu<br>ma<br>toi<br>d<br>Ar<br>thr<br>itis | C<br>00<br>03<br>87<br>3 | PA<br>M       | 5<br>0<br>6<br>6      | P1902<br>1 | peptidyl<br>glycine<br>alpha-<br>amidatin<br>g<br>monoox<br>ygenase | En<br>zy<br>me          | 15<br>5 | 0<br>.<br>5<br>4<br>2 | 0<br>.<br>6<br>9<br>2 | 6.<br>9<br>3<br>E<br>-<br>0<br>6 | 0.<br>02 |  | 1 | 2 | 0 | 20<br>02 | 2<br>0<br>1<br>9 |
| Rh<br>eu<br>ma<br>toi<br>d<br>Ar<br>thr<br>itis | C<br>00<br>03<br>87<br>3 | PA<br>X5      | 5<br>0<br>7<br>9      | Q025<br>48 | paired box 5                                                        |                         | 19<br>9 | 0<br>.<br>4<br>8<br>7 | 0<br>.<br>6<br>5<br>4 | 0.<br>9<br>9<br>7<br>9<br>8      | 0.<br>02 |  | 1 | 2 | 0 | 20<br>13 | 2<br>0<br>1<br>4 |
| Rh<br>eu<br>ma<br>toi                           | C<br>00<br>03            | AS<br>CC<br>1 | 5<br>1<br>0           | Q8N9<br>N2 | activating<br>signal<br>cointegrator 1                              |                         | 20<br>9 | 0<br>.<br>4           | 0<br>.<br>8           | 2.<br>6<br>1<br>E                | 0.<br>02 |  | 1 | 2 | 1 | 20<br>02 | 2<br>0<br>1<br>5 |



|                                                 |                          |                       |                       |            |                                                                                           |                                                |         |                       |                       |                                  |          |  |   |   |   |          |                  |
|-------------------------------------------------|--------------------------|-----------------------|-----------------------|------------|-------------------------------------------------------------------------------------------|------------------------------------------------|---------|-----------------------|-----------------------|----------------------------------|----------|--|---|---|---|----------|------------------|
| d<br>Ar<br>thr<br>itis                          | 87<br>3                  |                       | 0<br>8                |            | complex<br>subunit 1                                                                      |                                                |         | 9<br>5                | 4<br>6                | -<br>1<br>4                      |          |  |   |   |   |          |                  |
| Rh<br>eu<br>ma<br>toi<br>d<br>Ar<br>thr<br>itis | C<br>00<br>03<br>87<br>3 | AD<br>IPO<br>R1       | 5<br>1<br>0<br>9<br>4 | Q96A<br>54 | adipone<br>ctin<br>receptor<br>1                                                          | Re<br>ce<br>pto<br>r                           | 14<br>8 | 0<br>.<br>5<br>2<br>9 | 0<br>.<br>8<br>0<br>8 | 0.<br>6<br>5<br>8<br>4           | 0.<br>02 |  | 1 | 2 | 1 | 20<br>09 | 2<br>0<br>1<br>1 |
| Rh<br>eu<br>ma<br>toi<br>d<br>Ar<br>thr<br>itis | C<br>00<br>03<br>87<br>3 | PC<br>NA              | 5<br>1<br>1<br>1      | P1200<br>4 | prolifera<br>ting cell<br>nuclear<br>antigen                                              | Nu<br>cle<br>ic<br>aci<br>d<br>bin<br>din<br>g | 58<br>1 | 0<br>.<br>3<br>8<br>2 | 0<br>.<br>8<br>4<br>6 | 0.<br>9<br>7<br>6<br>0<br>6      | 0.<br>02 |  | 1 | 2 | 0 | 19<br>97 | 2<br>0<br>0<br>1 |
| Rh<br>eu<br>ma<br>toi<br>d<br>Ar<br>thr<br>itis | C<br>00<br>03<br>87<br>3 | PL<br>EK<br>HO<br>1   | 5<br>1<br>1<br>7<br>7 | Q53G<br>L0 | pleckstrin<br>homology<br>domain<br>containing O1                                         |                                                | 44      | 0<br>.<br>6<br>3<br>8 | 0<br>.<br>6<br>1<br>5 | 0.<br>4<br>8<br>3<br>4<br>1      | 0.<br>02 |  | 1 | 2 | 0 | 20<br>18 | 2<br>0<br>1<br>9 |
| Rh<br>eu<br>ma<br>toi<br>d<br>Ar<br>thr<br>itis | C<br>00<br>03<br>87<br>3 | PD<br>C               | 5<br>1<br>3<br>2      | P2094<br>1 | phosducin                                                                                 |                                                | 95      | 0<br>.<br>5<br>8<br>1 | 0<br>.<br>7<br>3<br>1 | 0.<br>0<br>0<br>1<br>0<br>1      | 0.<br>02 |  | 1 | 2 | 0 | 20<br>12 | 2<br>0<br>2<br>0 |
| Rh<br>eu<br>ma<br>toi<br>d<br>Ar<br>thr<br>itis | C<br>00<br>03<br>87<br>3 | TN<br>FR<br>SF1<br>2A | 5<br>1<br>3<br>3<br>0 | Q9NP<br>84 | TNF receptor<br>superfamily<br>member 12A                                                 |                                                | 17<br>3 | 0<br>.<br>5<br>0<br>9 | 0<br>.<br>6<br>9<br>2 | 0.<br>0<br>1<br>7<br>9<br>9<br>5 | 0.<br>02 |  | 1 | 2 | 0 | 20<br>07 | 2<br>0<br>1<br>2 |
| Rh<br>eu<br>ma<br>toi<br>d<br>Ar<br>thr<br>itis | C<br>00<br>03<br>87<br>3 | TR<br>PV<br>2         | 5<br>1<br>3<br>9<br>3 | Q9Y5<br>S1 | transient<br>receptor<br>potential<br>cation<br>channel<br>subfamil<br>y V<br>member<br>2 | Ion<br>ch<br>an<br>nel                         | 90      | 0<br>.<br>5<br>8<br>1 | 0<br>.<br>6<br>1<br>5 | 7.<br>9<br>2<br>E<br>-<br>1<br>3 | 0.<br>02 |  | 1 | 2 | 0 | 20<br>15 | 2<br>0<br>1<br>9 |

|                      |          |          |       |        |                                                    |                  |     |       |       |          |      |  |   |   |   |      |      |
|----------------------|----------|----------|-------|--------|----------------------------------------------------|------------------|-----|-------|-------|----------|------|--|---|---|---|------|------|
| Rheumatoid Arthritis | C0003873 | PD E4 A  | 5141  | P27815 | phosphodiesterase 4A                               |                  | 168 | 0.523 | 0.846 | 0.98167  | 0.02 |  | 1 | 2 | 0 | 2011 | 2019 |
| Rheumatoid Arthritis | C0003873 | PD E7 A  | 5150  | Q13946 | phosphodiesterase 7A                               |                  | 40  | 0.659 | 0.577 | 0.0455   | 0.02 |  | 1 | 2 | 0 | 2006 | 2018 |
| Rheumatoid Arthritis | C0003873 | PD GF RA | 5156  | P16234 | platelet derived growth factor receptor alpha      | Kinase           | 452 | 0.415 | 0.808 | 1.08     | 0.02 |  | 1 | 2 | 0 | 2007 | 2018 |
| Rheumatoid Arthritis | C0003873 | EN PP2   | 5168  | Q13822 | ectonucleotide pyrophosphatase/phosphodiesterase 2 | Enzyme           | 95  | 0.582 | 0.769 | 0.02791  | 0.02 |  | 1 | 2 | 0 | 2001 | 2015 |
| Rheumatoid Arthritis | C0003873 | AD A2    | 51816 | Q9NZK5 | adenosine deaminase 2                              | Enzyme           | 165 | 0.545 | 0.846 | 8.14E-08 | 0.02 |  | 1 | 2 | 0 | 2003 | 2010 |
| Rheumatoid Arthritis | C0003873 | PG R     | 5241  | P06401 | progesterone receptor                              | Nuclear receptor | 392 | 0.426 | 0.850 | 0.05142  | 0.02 |  | 1 | 2 | 0 | 2004 | 2009 |
| Rheumatoid Ar        | C0003873 | PIT X2   | 5308  | Q99697 | paired like homeodomain 2                          |                  | 248 | 0.489 | 0.808 | 0.07618  | 0.02 |  | 1 | 2 | 0 | 2011 | 2020 |

|                                                 |                          |                     |                       |            |                                                              |                |         |                       |                       |                                  |          |  |   |   |   |          |                  |
|-------------------------------------------------|--------------------------|---------------------|-----------------------|------------|--------------------------------------------------------------|----------------|---------|-----------------------|-----------------------|----------------------------------|----------|--|---|---|---|----------|------------------|
| thr<br>itis                                     |                          |                     |                       |            |                                                              |                |         |                       |                       |                                  |          |  |   |   |   |          |                  |
| Rh<br>eu<br>ma<br>toi<br>d<br>Ar<br>thr<br>itis | C<br>00<br>03<br>87<br>3 | PL<br>A2<br>G4<br>A | 5<br>3<br>2<br>1      | P4771<br>2 | phospho<br>lipase<br>A2<br>group<br>IVA                      | En<br>zy<br>me | 20<br>2 | 0<br>.<br>4<br>9<br>6 | 0<br>.<br>8<br>4<br>6 | 5.<br>9<br>8<br>E<br>-<br>0<br>5 | 0.<br>02 |  | 1 | 2 | 0 | 20<br>04 | 2<br>0<br>1<br>0 |
| Rh<br>eu<br>ma<br>toi<br>d<br>Ar<br>thr<br>itis | C<br>00<br>03<br>87<br>3 | TR<br>EM<br>2       | 5<br>4<br>2<br>0<br>9 | Q9NZ<br>C2 | triggering<br>receptor<br>expressed on<br>myeloid cells<br>2 |                | 23<br>9 | 0<br>.<br>5<br>1<br>9 | 0<br>.<br>7<br>6<br>9 | 3.<br>2<br>9<br>E<br>-<br>0<br>9 | 0.<br>02 |  | 1 | 2 | 0 | 20<br>12 | 2<br>0<br>1<br>8 |
| Rh<br>eu<br>ma<br>toi<br>d<br>Ar<br>thr<br>itis | C<br>00<br>03<br>87<br>3 | PO<br>U2<br>AF<br>1 | 5<br>4<br>5<br>0      | Q166<br>33 | POU class 2<br>homeobox<br>associating<br>factor 1           |                | 70      | 0<br>.<br>6<br>0<br>8 | 0<br>.<br>6<br>1<br>5 | 0.<br>5<br>6<br>5<br>3           | 0.<br>02 |  | 1 | 2 | 0 | 20<br>17 | 2<br>0<br>1<br>9 |
| Rh<br>eu<br>ma<br>toi<br>d<br>Ar<br>thr<br>itis | C<br>00<br>03<br>87<br>3 | AR<br>L15           | 5<br>4<br>6<br>2<br>2 | Q9N<br>XU5 | ADP<br>ribosylation<br>factor like<br>GTPase 15              |                | 34      | 0<br>.<br>7<br>6<br>9 | 0<br>.<br>3<br>4<br>6 | 0.<br>0<br>0<br>9<br>3<br>6      | 0.<br>02 |  | 1 | 2 | 1 | 20<br>13 | 2<br>0<br>1<br>8 |
| Rh<br>eu<br>ma<br>toi<br>d<br>Ar<br>thr<br>itis | C<br>00<br>03<br>87<br>3 | AH<br>I1            | 5<br>4<br>8<br>0<br>6 | Q8N1<br>57 | Abelson<br>helper<br>integration site<br>1                   |                | 22<br>1 | 0<br>.<br>5<br>1<br>3 | 0<br>.<br>8<br>4<br>6 | 1.<br>0<br>8<br>E<br>-<br>2<br>5 | 0.<br>02 |  | 1 | 2 | 0 | 20<br>00 | 2<br>0<br>0<br>4 |
| Rh<br>eu<br>ma<br>toi<br>d<br>Ar<br>thr<br>itis | C<br>00<br>03<br>87<br>3 | AT<br>G1<br>6L1     | 5<br>5<br>0<br>5<br>4 | Q676<br>U5 | autophagy<br>related 16 like<br>1                            |                | 12<br>0 | 0<br>.<br>5<br>4<br>3 | 0<br>.<br>7<br>6<br>9 | 0.<br>9<br>6<br>4<br>5<br>2      | 0.<br>02 |  | 1 | 2 | 0 | 20<br>12 | 2<br>0<br>1<br>9 |
| Rh<br>eu<br>ma<br>toi                           | C<br>00<br>03            | NA<br>T10           | 5<br>5<br>2           | Q9H0<br>A0 | N-<br>acetyltransfera<br>se 10                               |                | 13<br>3 | 0<br>.<br>5           | 0<br>.<br>7           | 4.<br>1<br>2<br>E                | 0.<br>02 |  | 1 | 2 | 0 | 20<br>03 | 2<br>0<br>1<br>9 |

|                                                 |                          |                     |                       |            |                                                                       |                         |         |                       |                                 |                                  |          |  |   |   |   |          |                  |
|-------------------------------------------------|--------------------------|---------------------|-----------------------|------------|-----------------------------------------------------------------------|-------------------------|---------|-----------------------|---------------------------------|----------------------------------|----------|--|---|---|---|----------|------------------|
| d<br>Ar<br>thr<br>itis                          | 87<br>3                  |                     | 2<br>6                |            |                                                                       |                         |         | 3<br>6                | 6<br>9                          | -<br>2<br>2                      |          |  |   |   |   |          |                  |
| Rh<br>eu<br>ma<br>toi<br>d<br>Ar<br>thr<br>itis | C<br>00<br>03<br>87<br>3 | PR<br>EL<br>P       | 5<br>5<br>4<br>9      | P5188      | proline and<br>arginine rich<br>end leucine<br>rich repeat<br>protein |                         | 26      | 0<br>.<br>6<br>9<br>5 | 0<br>.<br>5                     | 4.<br>7<br>1<br>E<br>-<br>0<br>5 | 0.<br>02 |  | 1 | 2 | 0 | 20<br>12 | 2<br>0<br>1<br>8 |
| Rh<br>eu<br>ma<br>toi<br>d<br>Ar<br>thr<br>itis | C<br>00<br>03<br>87<br>3 | CH<br>D7            | 5<br>5<br>6<br>3<br>6 | Q9P2<br>D1 | chromodomai<br>n helicase<br>DNA binding<br>protein 7                 |                         | 41<br>9 | 0<br>.<br>4<br>4<br>1 | 0<br>.<br>8<br>4<br>6           | 1                                | 0.<br>02 |  | 1 | 2 | 0 | 20<br>14 | 2<br>0<br>1<br>8 |
| Rh<br>eu<br>ma<br>toi<br>d<br>Ar<br>thr<br>itis | C<br>00<br>03<br>87<br>3 | W<br>DR<br>11       | 5<br>5<br>7<br>1<br>7 | Q9BZ<br>H6 | WD repeat<br>domain 11                                                |                         | 17<br>9 | 0<br>.<br>5<br>2<br>4 | 0<br>.<br>8<br>0<br>8           | 1.<br>3<br>7<br>E<br>-<br>0<br>8 | 0.<br>02 |  | 1 | 2 | 0 | 20<br>01 | 2<br>0<br>0<br>7 |
| Rh<br>eu<br>ma<br>toi<br>d<br>Ar<br>thr<br>itis | C<br>00<br>03<br>87<br>3 | MA<br>P2<br>K1      | 5<br>6<br>0<br>4      | Q027<br>50 | mitogen<br>-<br>activate<br>d protein<br>kinase<br>kinase 1           | Ki<br>nas<br>e          | 38<br>9 | 0<br>.<br>4<br>3<br>9 | 0<br>.<br>8<br>4<br>6<br>6<br>9 | 0.<br>02                         | 0.<br>02 |  | 1 | 2 | 0 | 20<br>10 | 2<br>0<br>1<br>9 |
| Rh<br>eu<br>ma<br>toi<br>d<br>Ar<br>thr<br>itis | C<br>00<br>03<br>87<br>3 | CC<br>L28           | 5<br>6<br>4<br>7<br>7 | Q9NR<br>J3 | C-C motif<br>chemokine<br>ligand 28                                   |                         | 85      | 0<br>.<br>5<br>8<br>7 | 0<br>.<br>7<br>6<br>9           | 0.<br>0<br>5<br>1<br>5<br>9<br>9 | 0.<br>02 |  | 1 | 2 | 0 | 20<br>15 | 2<br>0<br>1<br>8 |
| Rh<br>eu<br>ma<br>toi<br>d<br>Ar<br>thr<br>itis | C<br>00<br>03<br>87<br>3 | SL<br>C1<br>2A<br>9 | 5<br>6<br>9<br>9<br>6 | Q9BX<br>P2 | solute<br>carrier<br>family<br>12<br>member<br>9                      | Tr<br>ans<br>por<br>ter | 28<br>0 | 0<br>.<br>4<br>5<br>4 | 0<br>.<br>7<br>6<br>9           | 1.<br>1<br>8<br>E<br>-<br>1<br>5 | 0.<br>02 |  | 1 | 2 | 0 | 20<br>00 | 2<br>0<br>0<br>3 |

|                      |          |           |        |        |                                         |           |     |       |       |           |      |  |   |   |   |      |      |
|----------------------|----------|-----------|--------|--------|-----------------------------------------|-----------|-----|-------|-------|-----------|------|--|---|---|---|------|------|
| Rheumatoid Arthritis | C0003873 | CEMP      | 57214  | Q8WUJ3 | cell migration inducing hyaluronidase 1 |           | 64  | 0.617 | 0.615 | 4.4E-17   | 0.02 |  | 1 | 2 | 0 | 2013 | 2015 |
| Rheumatoid Arthritis | C0003873 | AICDA     | 57379  | Q9GZX7 | activation induced cytidine deaminase   | Enzyme    | 265 | 0.463 | 0.885 | 9.21E-06  | 0.02 |  | 1 | 2 | 0 | 2009 | 2010 |
| Rheumatoid Arthritis | C0003873 | MI R410   | 574434 |        | microRNA 410                            |           | 87  | 0.575 | 0.692 |           | 0.02 |  | 1 | 2 | 0 | 2019 | 2019 |
| Rheumatoid Arthritis | C0003873 | KIDINS220 | 57498  | Q9ULH0 | kinase D interacting substrate 220      |           | 145 | 0.534 | 0.769 | 0.0073562 | 0.02 |  | 1 | 2 | 1 | 2009 | 2018 |
| Rheumatoid Arthritis | C0003873 | MI B1     | 57534  | Q86YT6 | mindbomba E3 ubiquitin protein ligase 1 | Enzyme    | 329 | 0.438 | 0.769 | 3.36E-88  | 0.02 |  | 1 | 2 | 0 | 2001 | 2002 |
| Rheumatoid Arthritis | C0003873 | PTN       | 5764   | P21246 | pleiotrophin                            | Signaling | 164 | 0.515 | 0.808 | 0.007507  | 0.02 |  | 1 | 2 | 0 | 2003 | 2017 |
| Rheumatoid Ar        | C0003873 | CIP2A     | 57650  | Q8TCG1 | cellular inhibitor of PP2A              |           | 141 | 0.524 | 0.808 | 1.36E-    | 0.02 |  | 1 | 2 | 0 | 2012 | 2013 |

|                                                 |                          |                |                       |            |                                                                    |                                         |         |                       |                       |                                  |          |  |   |   |   |          |                  |
|-------------------------------------------------|--------------------------|----------------|-----------------------|------------|--------------------------------------------------------------------|-----------------------------------------|---------|-----------------------|-----------------------|----------------------------------|----------|--|---|---|---|----------|------------------|
| thr<br>itis                                     |                          |                |                       |            |                                                                    |                                         |         |                       |                       | 1<br>3                           |          |  |   |   |   |          |                  |
| Rh<br>eu<br>ma<br>toi<br>d<br>Ar<br>thr<br>itis | C<br>00<br>03<br>87<br>3 | PH<br>RF<br>1  | 5<br>7<br>6<br>6<br>1 | Q9P1<br>Y6 | PHD and ring<br>finger<br>domains 1                                |                                         | 17      | 0<br>.<br>7<br>4<br>3 | 0<br>.<br>3<br>4<br>6 | 0.<br>0<br>5<br>6<br>5<br>2<br>1 | 0.<br>02 |  | 1 | 2 | 0 | 20<br>11 | 2<br>0<br>1<br>4 |
| Rh<br>eu<br>ma<br>toi<br>d<br>Ar<br>thr<br>itis | C<br>00<br>03<br>87<br>3 | BA<br>K1       | 5<br>7<br>8           | Q166<br>11 | BCL2<br>antagoni<br>st/killer<br>1                                 | Sig<br>nal<br>ing                       | 11<br>5 | 0<br>.<br>5<br>5<br>5 | 0<br>.<br>7<br>6<br>9 | 7.<br>4<br>E<br>-<br>0<br>6      | 0.<br>02 |  | 1 | 2 | 0 | 20<br>07 | 2<br>0<br>1<br>8 |
| Rh<br>eu<br>ma<br>toi<br>d<br>Ar<br>thr<br>itis | C<br>00<br>03<br>87<br>3 | RA<br>C2       | 5<br>8<br>8<br>0      | P1515<br>3 | Rac<br>family<br>small<br>GTPase<br>2                              | En<br>zy<br>me<br>mo<br>dul<br>ato<br>r | 11<br>9 | 0<br>.<br>5<br>5<br>6 | 0<br>.<br>7<br>3<br>1 | 0.<br>9<br>6<br>2<br>7           | 0.<br>02 |  | 1 | 2 | 0 | 20<br>07 | 2<br>0<br>2<br>0 |
| Rh<br>eu<br>ma<br>toi<br>d<br>Ar<br>thr<br>itis | C<br>00<br>03<br>87<br>3 | MO<br>K        | 5<br>8<br>9<br>1      | Q9U<br>Q07 | MOK<br>protein<br>kinase                                           | Ki<br>nas<br>e                          | 25<br>1 | 0<br>.<br>4<br>7<br>6 | 0<br>.<br>7<br>6<br>9 | 8.<br>8<br>4<br>E<br>-<br>2<br>2 | 0.<br>02 |  | 1 | 2 | 0 | 20<br>09 | 2<br>0<br>1<br>4 |
| Rh<br>eu<br>ma<br>toi<br>d<br>Ar<br>thr<br>itis | C<br>00<br>03<br>87<br>3 | RA<br>F1       | 5<br>8<br>9<br>4      | P0404<br>9 | Raf-1<br>proto-<br>oncogen<br>e,<br>serine/th<br>reonine<br>kinase | Ki<br>nas<br>e                          | 47<br>0 | 0<br>.<br>4<br>1<br>8 | 0<br>.<br>8<br>8<br>5 | 0.<br>8<br>5<br>2<br>9<br>5      | 0.<br>02 |  | 1 | 2 | 0 | 20<br>04 | 2<br>0<br>1<br>3 |
| Rh<br>eu<br>ma<br>toi<br>d<br>Ar<br>thr<br>itis | C<br>00<br>03<br>87<br>3 | BC<br>HE       | 5<br>9<br>0           | P0627<br>6 | butyrylcholine<br>sterase                                          |                                         | 39<br>2 | 0<br>.<br>4<br>4<br>7 | 0<br>.<br>9<br>2<br>3 | 1.<br>0<br>6<br>E<br>-<br>1<br>3 | 0.<br>02 |  | 1 | 2 | 0 | 20<br>15 | 2<br>0<br>1<br>9 |
| Rh<br>eu<br>ma<br>toi                           | C<br>00<br>03            | PL<br>AA<br>T4 | 5<br>9<br>2<br>0      | Q9UL<br>19 | phospholipase<br>A and<br>acyltransferas<br>e 4                    |                                         | 19<br>0 | 0<br>.<br>5           | 0<br>.<br>8           | 1.<br>2<br>2<br>E                | 0.<br>02 |  | 1 | 2 | 0 | 20<br>08 | 2<br>0<br>0<br>9 |

|                                                 |                          |                |                       |            |                                                |                                                |         |                       |                       |                                  |          |  |         |   |   |          |                  |
|-------------------------------------------------|--------------------------|----------------|-----------------------|------------|------------------------------------------------|------------------------------------------------|---------|-----------------------|-----------------------|----------------------------------|----------|--|---------|---|---|----------|------------------|
| d<br>Ar<br>thr<br>itis                          | 87<br>3                  |                |                       |            |                                                |                                                |         |                       | 0<br>8                | -<br>0<br>7                      |          |  |         |   |   |          |                  |
| Rh<br>eu<br>ma<br>toi<br>d<br>Ar<br>thr<br>itis | C<br>00<br>03<br>87<br>3 | RB<br>1        | 5<br>9<br>2<br>5      | P0640<br>0 | RB<br>transcrip<br>tional<br>corepres<br>sor 1 | Nu<br>cle<br>ic<br>aci<br>d<br>bin<br>din<br>g | 33<br>9 | 0<br>.<br>4<br>4<br>4 | 0<br>.<br>8<br>8<br>5 | 1                                | 0.<br>02 |  | 1       | 2 | 0 | 20<br>04 | 2<br>0<br>1<br>8 |
| Rh<br>eu<br>ma<br>toi<br>d<br>Ar<br>thr<br>itis | C<br>00<br>03<br>87<br>3 | UB<br>L5       | 5<br>9<br>2<br>8<br>6 | Q9BZ<br>L1 | ubiquitin like<br>5                            |                                                | 29      | 0<br>.<br>6<br>8<br>6 | 0<br>.<br>5           | 0.<br>0<br>1<br>6<br>3<br>2<br>1 | 0.<br>02 |  | 1       | 2 | 0 | 20<br>18 | 2<br>0<br>1<br>8 |
| Rh<br>eu<br>ma<br>toi<br>d<br>Ar<br>thr<br>itis | C<br>00<br>03<br>87<br>3 | RB<br>P2       | 5<br>9<br>4<br>8      | P5012<br>0 | retinol binding<br>protein 2                   |                                                | 60      | 0<br>.<br>6<br>1<br>5 | 0<br>.<br>6<br>1<br>5 | 0.<br>2<br>2<br>0<br>8<br>9      | 0.<br>02 |  | 1       | 2 | 0 | 19<br>96 | 2<br>0<br>0<br>5 |
| Rh<br>eu<br>ma<br>toi<br>d<br>Ar<br>thr<br>itis | C<br>00<br>03<br>87<br>3 | RD<br>X        | 5<br>9<br>6<br>2      | P3524<br>1 | radixin                                        | Ce<br>llul<br>ar<br>str<br>uct<br>ure          | 80      | 0<br>.<br>5<br>9<br>3 | 0<br>.<br>6<br>1<br>5 | 0.<br>8<br>5<br>2<br>4<br>5      | 0.<br>02 |  | 1       | 2 | 0 | 20<br>14 | 2<br>0<br>2<br>0 |
| Rh<br>eu<br>ma<br>toi<br>d<br>Ar<br>thr<br>itis | C<br>00<br>03<br>87<br>3 | RN<br>AS<br>E2 | 6<br>0<br>3<br>6      | P1015<br>3 | ribonuclease<br>A family<br>member 2           |                                                | 61      | 0<br>.<br>6<br>2<br>1 | 0<br>.<br>6<br>9<br>2 |                                  | 0.<br>02 |  | 1       | 2 | 1 | 20<br>15 | 2<br>0<br>1<br>9 |
| Rh<br>eu<br>ma<br>toi<br>d<br>Ar<br>thr<br>itis | C<br>00<br>03<br>87<br>3 | BC<br>L6       | 6<br>0<br>4           | P4118<br>2 | BCL6<br>transcription<br>repressor             |                                                | 30<br>9 | 0<br>.<br>4<br>4<br>4 | 0<br>.<br>8<br>0<br>8 | 0.<br>9<br>6<br>0<br>3<br>8      | 0.<br>02 |  | 0.<br>5 | 2 | 0 | 20<br>18 | 2<br>0<br>1<br>9 |
| Rh<br>eu                                        | C<br>00                  | RN<br>F2       | 6<br>0                | Q994<br>96 | ring finger<br>protein 2                       |                                                | 63      | 0<br>.                | 0<br>.                | 0.<br>9                          | 0.<br>02 |  | 1       | 2 | 0 | 20<br>09 | 2<br>0           |

|                                                 |                          |               |                       |                           |                                                        |                                     |         |                            |                                 |                             |          |   |   |   |          |                  |                  |
|-------------------------------------------------|--------------------------|---------------|-----------------------|---------------------------|--------------------------------------------------------|-------------------------------------|---------|----------------------------|---------------------------------|-----------------------------|----------|---|---|---|----------|------------------|------------------|
| ma<br>toi<br>d<br>Ar<br>thr<br>itis             | 03<br>87<br>3            |               | 4<br>5                |                           |                                                        |                                     |         | 6<br>0<br>8                | 6<br>1<br>5                     | 9<br>7<br>4<br>3            |          |   |   |   |          | 1<br>8           |                  |
| Rh<br>eu<br>ma<br>toi<br>d<br>Ar<br>thr<br>itis | C<br>00<br>03<br>87<br>3 | IG<br>AN<br>1 | 6<br>0<br>4<br>9<br>8 |                           | IgA<br>nephropathy                                     |                                     | 14<br>0 | 0<br>.<br>5<br>2<br>4      | 0<br>.<br>8<br>0<br>8           |                             | 0.<br>02 |   | 1 | 2 | 0        | 19<br>94         | 2<br>0<br>1<br>9 |
| Rh<br>eu<br>ma<br>toi<br>d<br>Ar<br>thr<br>itis | C<br>00<br>03<br>87<br>3 | RO<br>RC      | 6<br>0<br>9<br>7      | P5144<br>9                | RAR<br>related<br>orphan<br>receptor<br>C              | Nu<br>cle<br>ar<br>rec<br>ept<br>or | 88      | 0<br>.<br>5<br>7<br>6<br>9 | 0<br>.<br>7<br>6<br>9<br>8<br>5 | 0.<br>02                    |          | 1 | 2 | 0 | 20<br>16 | 2<br>0<br>1<br>9 |                  |
| Rh<br>eu<br>ma<br>toi<br>d<br>Ar<br>thr<br>itis | C<br>00<br>03<br>87<br>3 | RP<br>L17     | 6<br>1<br>3<br>9      | P1862<br>1                | ribosomal<br>protein L17                               |                                     | 10<br>4 | 0<br>.<br>5<br>5<br>9      | 0<br>.<br>7<br>3<br>1           | 0.<br>9<br>2<br>4<br>1<br>2 | 0.<br>02 |   | 1 | 2 | 0        | 20<br>04         | 2<br>0<br>1<br>7 |
| Rh<br>eu<br>ma<br>toi<br>d<br>Ar<br>thr<br>itis | C<br>00<br>03<br>87<br>3 | SA<br>A3<br>P | 6<br>2<br>9<br>0      |                           | serum amyloid<br>A3,<br>pseudogene                     |                                     | 23      | 0<br>.<br>7<br>2<br>2      | 0<br>.<br>5                     |                             | 0.<br>02 |   | 1 | 2 | 0        | 20<br>01         | 2<br>0<br>1<br>1 |
| Rh<br>eu<br>ma<br>toi<br>d<br>Ar<br>thr<br>itis | C<br>00<br>03<br>87<br>3 | SA<br>T1      | 6<br>3<br>0<br>3      | P2167<br>3                | spermidine/sp<br>ermine N1-<br>acetyltransfera<br>se 1 |                                     | 13<br>5 | 0<br>.<br>5<br>3<br>9      | 0<br>.<br>8<br>0<br>8           | 0.<br>8<br>7<br>0<br>6      | 0.<br>02 |   | 1 | 2 | 0        | 20<br>00         | 2<br>0<br>1<br>4 |
| Rh<br>eu<br>ma<br>toi<br>d<br>Ar<br>thr<br>itis | C<br>00<br>03<br>87<br>3 | CC<br>L4      | 6<br>3<br>5<br>1      | P1323<br>6;Q8<br>NHW<br>4 | C-C<br>motif<br>chemoki<br>ne<br>ligand 4              | Sig<br>nal<br>ing                   | 27<br>6 | 0<br>.<br>4<br>6<br>6      | 0<br>.<br>9<br>2<br>3           | 0.<br>2<br>4<br>1<br>3<br>4 | 0.<br>02 |   | 1 | 2 | 1        | 19<br>94         | 1<br>9<br>9<br>5 |



|                      |          |         |       |        |                                             |                         |     |       |       |          |      |  |   |   |   |      |      |
|----------------------|----------|---------|-------|--------|---------------------------------------------|-------------------------|-----|-------|-------|----------|------|--|---|---|---|------|------|
| Rheumatoid Arthritis | C0003873 | CC L17  | 6361  | Q92583 | C-C motif chemokine ligand 17               | Signaling               | 162 | 0.518 | 0.800 | 0.00139  | 0.02 |  | 1 | 2 | 0 | 2001 | 2017 |
| Rheumatoid Arthritis | C0003873 | CC L19  | 6363  | Q99731 | C-C motif chemokine ligand 19               | Signaling               | 126 | 0.542 | 0.692 | 0.31691  | 0.02 |  | 1 | 2 | 0 | 2017 | 2017 |
| Rheumatoid Arthritis | C0003873 | CC L22  | 6367  | O00626 | C-C motif chemokine ligand 22               | Signaling               | 182 | 0.5   | 0.846 | 0.08401  | 0.02 |  | 1 | 2 | 0 | 2010 | 2017 |
| Rheumatoid Arthritis | C0003873 | CC L25  | 6370  | O15444 | C-C motif chemokine ligand 25               | Signaling               | 61  | 0.61  | 0.692 | 0.015241 | 0.02 |  | 1 | 2 | 0 | 2010 | 2014 |
| Rheumatoid Arthritis | C0003873 | SD C2   | 6383  | P34741 | syndecan 2                                  | Extracellular structure | 120 | 0.536 | 0.808 | 0.4049   | 0.02 |  | 1 | 2 | 0 | 2005 | 2012 |
| Rheumatoid Arthritis | C0003873 | TINAGL1 | 64129 | Q9GZM7 | tubulointerstitial nephritis antigen like 1 | Enzyme                  | 38  | 0.659 | 0.538 | 0.00329  | 0.02 |  | 1 | 2 | 0 | 2012 | 2013 |
| Rheumatoid Ar        | C0003873 | SEMA4A  | 64218 | Q9H3S1 | semaphorin 4A                               | Signaling               | 141 | 0.569 | 0.692 | 1.84E-   | 0.02 |  | 1 | 2 | 0 | 2015 | 2015 |

|                                                 |                          |                |                       |            |                                                   |                         |         |                       |                       |                                  |          |  |   |   |   |          |                  |
|-------------------------------------------------|--------------------------|----------------|-----------------------|------------|---------------------------------------------------|-------------------------|---------|-----------------------|-----------------------|----------------------------------|----------|--|---|---|---|----------|------------------|
| thr<br>itis                                     |                          |                |                       |            |                                                   |                         |         |                       |                       | 0<br>5                           |          |  |   |   |   |          |                  |
| Rh<br>eu<br>ma<br>toi<br>d<br>Ar<br>thr<br>itis | C<br>00<br>03<br>87<br>3 | CL<br>EC<br>7A | 6<br>4<br>5<br>8<br>1 | Q9BX<br>N2 | C-type lectin<br>domain<br>containing 7A          |                         | 12<br>6 | 0<br>.<br>5<br>5<br>3 | 0<br>.<br>7<br>6<br>9 | 5.<br>5<br>1<br>E<br>-<br>1<br>2 | 0.<br>02 |  | 1 | 2 | 1 | 20<br>10 | 2<br>0<br>1<br>3 |
| Rh<br>eu<br>ma<br>toi<br>d<br>Ar<br>thr<br>itis | C<br>00<br>03<br>87<br>3 | AG<br>XT<br>2  | 6<br>4<br>9<br>0<br>2 | Q9BY<br>V1 | alanine--<br>glyoxylate<br>aminotransfer<br>ase 2 |                         | 25      | 0<br>.<br>7<br>2<br>9 | 0<br>.<br>3<br>8<br>5 | 3.<br>7<br>1<br>E<br>-<br>2<br>8 | 0.<br>02 |  | 1 | 2 | 0 | 20<br>17 | 2<br>0<br>1<br>9 |
| Rh<br>eu<br>ma<br>toi<br>d<br>Ar<br>thr<br>itis | C<br>00<br>03<br>87<br>3 | SL<br>C2<br>A3 | 6<br>5<br>1<br>5      | P1116<br>9 | solute<br>carrier<br>family 2<br>member<br>3      | Tr<br>ans<br>por<br>ter | 14<br>4 | 0<br>.<br>5<br>3<br>4 | 0<br>.<br>7<br>6<br>9 | 0.<br>0<br>1<br>0<br>3<br>3<br>3 | 0.<br>02 |  | 1 | 2 | 0 | 20<br>14 | 2<br>0<br>1<br>9 |
| Rh<br>eu<br>ma<br>toi<br>d<br>Ar<br>thr<br>itis | C<br>00<br>03<br>87<br>3 | SL<br>C6<br>A2 | 6<br>5<br>3<br>0      | P2397<br>5 | solute<br>carrier<br>family 6<br>member<br>2      | Tr<br>ans<br>por<br>ter | 23<br>8 | 0<br>.<br>4<br>9      | 0<br>.<br>8<br>4<br>6 | 0.<br>0<br>8<br>1<br>5<br>2<br>4 | 0.<br>02 |  | 1 | 2 | 0 | 20<br>19 | 2<br>0<br>2<br>0 |
| Rh<br>eu<br>ma<br>toi<br>d<br>Ar<br>thr<br>itis | C<br>00<br>03<br>87<br>3 | SU<br>MO<br>3  | 6<br>6<br>1<br>2      | P5585<br>4 | small<br>ubiquitin like<br>modifier 3             |                         | 30      | 0<br>.<br>6<br>8<br>6 | 0<br>.<br>5<br>3<br>8 | 0.<br>3<br>2<br>8<br>4<br>1      | 0.<br>02 |  | 1 | 2 | 0 | 20<br>13 | 2<br>0<br>1<br>9 |
| Rh<br>eu<br>ma<br>toi<br>d<br>Ar<br>thr<br>itis | C<br>00<br>03<br>87<br>3 | SU<br>MO<br>2  | 6<br>6<br>1<br>3      | P6195<br>6 | small<br>ubiquitin like<br>modifier 2             |                         | 42      | 0<br>.<br>6<br>6<br>6 | 0<br>.<br>6<br>1<br>5 | 0.<br>8<br>6<br>9<br>4<br>3      | 0.<br>02 |  | 1 | 2 | 0 | 20<br>13 | 2<br>0<br>1<br>9 |
| Rh<br>eu<br>ma<br>toi                           | C<br>00<br>03            | SN<br>CA       | 6<br>6<br>2<br>2      | P3784<br>0 | synuclei<br>n alpha                               | Tr<br>ans<br>por<br>ter | 44<br>9 | 0<br>.<br>4           | 0<br>.<br>8           | 0.<br>8<br>8                     | 0.<br>02 |  | 1 | 2 | 0 | 20<br>04 | 2<br>0<br>1<br>7 |

|                                                 |                          |                |                  |            |                                                                         |                                                              |         |                       |                       |                             |          |  |   |   |   |          |                  |
|-------------------------------------------------|--------------------------|----------------|------------------|------------|-------------------------------------------------------------------------|--------------------------------------------------------------|---------|-----------------------|-----------------------|-----------------------------|----------|--|---|---|---|----------|------------------|
| d<br>Ar<br>thr<br>itis                          | 87<br>3                  |                |                  |            |                                                                         |                                                              |         | 2<br>7                | 8<br>5                | 2<br>9                      |          |  |   |   |   |          |                  |
| Rh<br>eu<br>ma<br>toi<br>d<br>Ar<br>thr<br>itis | C<br>00<br>03<br>87<br>3 | SO<br>D1       | 6<br>6<br>4<br>7 | P0044<br>1 | superoxi<br>de<br>dismutas<br>e 1                                       | En<br>zy<br>me                                               | 68<br>9 | 0<br>.<br>3<br>7<br>9 | 0<br>.<br>9<br>6<br>2 | 0.<br>1<br>7<br>3           | 0.<br>02 |  | 1 | 2 | 0 | 20<br>08 | 2<br>0<br>0<br>8 |
| Rh<br>eu<br>ma<br>toi<br>d<br>Ar<br>thr<br>itis | C<br>00<br>03<br>87<br>3 | SO<br>D3       | 6<br>6<br>4<br>9 | P0829<br>4 | superoxi<br>de<br>dismutas<br>e 3                                       | En<br>zy<br>me                                               | 13<br>8 | 0<br>.<br>5<br>3<br>1 | 0<br>.<br>8<br>0<br>8 | 0.<br>0<br>0<br>7<br>2<br>3 | 0.<br>02 |  | 1 | 2 | 0 | 20<br>01 | 2<br>0<br>0<br>9 |
| Rh<br>eu<br>ma<br>toi<br>d<br>Ar<br>thr<br>itis | C<br>00<br>03<br>87<br>3 | SP<br>AR<br>C  | 6<br>6<br>7<br>8 | P0948<br>6 | secreted<br>protein<br>acidic<br>and<br>cysteine<br>rich                | Sig<br>nal<br>ing                                            | 34<br>4 | 0<br>.<br>4<br>4<br>5 | 0<br>.<br>8<br>4<br>6 | 0.<br>8<br>9<br>1<br>4<br>8 | 0.<br>02 |  | 1 | 2 | 0 | 20<br>15 | 2<br>0<br>1<br>9 |
| Rh<br>eu<br>ma<br>toi<br>d<br>Ar<br>thr<br>itis | C<br>00<br>03<br>87<br>3 | SS<br>RP<br>1  | 6<br>7<br>4<br>9 | Q089<br>45 | structure<br>specific<br>recognition<br>protein 1                       |                                                              | 86      | 0<br>.<br>5<br>7<br>5 | 0<br>.<br>7<br>3<br>1 | 0.<br>9<br>9<br>5<br>8<br>5 | 0.<br>02 |  | 1 | 2 | 0 | 20<br>03 | 2<br>0<br>1<br>7 |
| Rh<br>eu<br>ma<br>toi<br>d<br>Ar<br>thr<br>itis | C<br>00<br>03<br>87<br>3 | SS<br>TR<br>4  | 6<br>7<br>5<br>4 | P3139<br>1 | somatost<br>atin<br>receptor<br>4                                       | G-<br>pro<br>tei<br>n<br>co<br>upl<br>ed<br>rec<br>ept<br>or | 27<br>3 | 0<br>.<br>4<br>6<br>9 | 0<br>.<br>8<br>4<br>6 | 3.<br>7<br>E<br>-<br>1<br>3 | 0.<br>02 |  | 1 | 2 | 0 | 19<br>99 | 2<br>0<br>0<br>4 |
| Rh<br>eu<br>ma<br>toi<br>d<br>Ar<br>thr<br>itis | C<br>00<br>03<br>87<br>3 | ST<br>AT<br>5A | 6<br>7<br>7<br>6 | P4222<br>9 | signal<br>transduc<br>er and<br>activator<br>of<br>transcrip<br>tion 5A | Nu<br>cle<br>ic<br>aci<br>d<br>bin<br>din<br>g               | 31<br>8 | 0<br>.<br>4<br>4<br>5 | 0<br>.<br>8<br>0<br>8 | 0.<br>9<br>9<br>9<br>4      | 0.<br>02 |  | 1 | 2 | 0 | 20<br>12 | 2<br>0<br>1<br>9 |

|                      |          |       |       |        |                                                    |                            |     |       |       |          |      |  |   |   |   |      |      |
|----------------------|----------|-------|-------|--------|----------------------------------------------------|----------------------------|-----|-------|-------|----------|------|--|---|---|---|------|------|
| Rheumatoid Arthritis | C0003873 | STAT6 | 6778  | P42226 | signal transducer and activator of transcription 6 | Nucleic acid binding       | 281 | 0.45  | 0.88  | 0.949    | 0.02 |  | 1 | 2 | 0 | 2000 | 2010 |
| Rheumatoid Arthritis | C0003873 | BRIS3 | 6800  | P32247 | bombesin receptor subtype 3                        | G-protein coupled receptor | 261 | 0.474 | 0.846 | 0.949    | 0.02 |  | 1 | 2 | 0 | 1999 | 2004 |
| Rheumatoid Arthritis | C0003873 | CNTN2 | 69000 | Q02246 | contactin 2                                        | Receptor                   | 99  | 0.581 | 0.692 | 0.711    | 0.02 |  | 1 | 2 | 0 | 1995 | 2003 |
| Rheumatoid Arthritis | C0003873 | TBCA  | 6902  | O75347 | tubulin folding cofactor A                         | Chaperone                  | 43  | 0.682 | 0.538 | 0.604    | 0.02 |  | 1 | 2 | 0 | 2018 | 2019 |
| Rheumatoid Arthritis | C0003873 | GCFC2 | 6936  | P16383 | GC-rich sequence DNA-binding factor 2              | Nucleic acid binding       | 21  | 0.722 | 0.462 | 2.56E-24 | 0.02 |  | 1 | 2 | 0 | 2019 | 2019 |
| Rheumatoid Arthritis | C0003873 | TGTG  | 7038  | P01266 | thyroglobulin                                      | Enzyme modulator           | 240 | 0.488 | 0.808 | 2.88E-59 | 0.02 |  | 1 | 2 | 1 | 2018 | 2018 |
| Rheumatoid           | C0003    | TGFA  | 7039  | P01135 | transforming growth                                | Signaling                  | 376 | 0.4   | 0.8   | 0.719    | 0.02 |  | 1 | 2 | 0 | 1993 | 2005 |

|                                                 |                          |               |                  |            |                                                                      |                |         |                       |                       |                                  |          |  |   |   |   |          |                  |
|-------------------------------------------------|--------------------------|---------------|------------------|------------|----------------------------------------------------------------------|----------------|---------|-----------------------|-----------------------|----------------------------------|----------|--|---|---|---|----------|------------------|
| d<br>Ar<br>thr<br>itis                          | 87<br>3                  |               |                  |            | factor<br>alpha                                                      |                |         | 3<br>2                | 8<br>5                | 8<br>1                           |          |  |   |   |   |          |                  |
| Rh<br>eu<br>ma<br>toi<br>d<br>Ar<br>thr<br>itis | C<br>00<br>03<br>87<br>3 | TG<br>M2      | 7<br>0<br>5<br>2 | P2198<br>0 | transglut<br>aminase<br>2                                            | En<br>zy<br>me | 31<br>5 | 0<br>.<br>4<br>4<br>5 | 0<br>.<br>8<br>0<br>8 | 6.<br>8<br>1<br>E<br>-<br>1<br>8 | 0.<br>02 |  | 1 | 2 | 0 | 20<br>07 | 2<br>0<br>1<br>3 |
| Rh<br>eu<br>ma<br>toi<br>d<br>Ar<br>thr<br>itis | C<br>00<br>03<br>87<br>3 | TH<br>BD      | 7<br>0<br>5<br>6 | P0720<br>4 | thrombomod<br>ulin                                                   |                | 30<br>3 | 0<br>.<br>4<br>5<br>7 | 0<br>.<br>7<br>6<br>9 | 0.<br>0<br>5<br>3<br>7<br>6<br>9 | 0.<br>02 |  | 1 | 2 | 0 | 20<br>12 | 2<br>0<br>1<br>8 |
| Rh<br>eu<br>ma<br>toi<br>d<br>Ar<br>thr<br>itis | C<br>00<br>03<br>87<br>3 | TH<br>OP<br>1 | 7<br>0<br>6<br>4 | P5288<br>8 | thimet<br>oligopep<br>tidase 1                                       | En<br>zy<br>me | 91      | 0<br>.<br>5<br>7<br>3 | 0<br>.<br>8<br>4<br>6 | 0.<br>0<br>0<br>1<br>2<br>1      | 0.<br>02 |  | 1 | 2 | 0 | 20<br>17 | 2<br>0<br>1<br>7 |
| Rh<br>eu<br>ma<br>toi<br>d<br>Ar<br>thr<br>itis | C<br>00<br>03<br>87<br>3 | TH<br>Y1      | 7<br>0<br>7<br>0 | P0421<br>6 | Thy-1<br>surface<br>antigen                                          | cell           | 19<br>7 | 0<br>.<br>4<br>9<br>6 | 0<br>.<br>8<br>0<br>8 | 0.<br>0<br>4<br>8<br>9<br>5      | 0.<br>02 |  | 1 | 2 | 0 | 20<br>17 | 2<br>0<br>1<br>9 |
| Rh<br>eu<br>ma<br>toi<br>d<br>Ar<br>thr<br>itis | C<br>00<br>03<br>87<br>3 | TI<br>A1      | 7<br>0<br>7<br>2 | P3148<br>3 | TIA1<br>cytotoxic<br>granule<br>associated<br>RNA binding<br>protein |                | 96      | 0<br>.<br>5<br>9<br>5 | 0<br>.<br>5<br>7<br>3 | 0.<br>2<br>4<br>9<br>3           | 0.<br>02 |  | 1 | 2 | 0 | 20<br>06 | 2<br>0<br>0<br>7 |
| Rh<br>eu<br>ma<br>toi<br>d<br>Ar<br>thr<br>itis | C<br>00<br>03<br>87<br>3 | TL<br>R1      | 7<br>0<br>9<br>6 | Q153<br>99 | toll<br>receptor 1                                                   | like           | 19<br>8 | 0<br>.<br>4<br>9<br>6 | 0<br>.<br>8<br>0<br>8 | 5.<br>8<br>7<br>E<br>-<br>2<br>3 | 0.<br>02 |  | 1 | 2 | 1 | 20<br>11 | 2<br>0<br>1<br>7 |
| Rh<br>eu                                        | C<br>00                  | TT<br>R       | 7<br>2           | P0276<br>6 | transthyr<br>etin                                                    | Tr<br>ans      | 46<br>1 | 0<br>.<br>.           | 0<br>.<br>.           | 0.<br>5                          | 0.<br>02 |  | 1 | 2 | 0 | 20<br>15 | 2<br>0           |

|                         |                          |                 |                            |            |                                                                                     |                                    |         |                       |                       |                                  |          |  |         |   |   |          |                  |
|-------------------------|--------------------------|-----------------|----------------------------|------------|-------------------------------------------------------------------------------------|------------------------------------|---------|-----------------------|-----------------------|----------------------------------|----------|--|---------|---|---|----------|------------------|
| matoid<br>Arthritis     | 03<br>87<br>3            |                 | 7<br>6                     |            |                                                                                     | porter                             |         | 4<br>2<br>3           | 8<br>8<br>5           | 1<br>5<br>6<br>6                 |          |  |         |   |   |          | 1<br>9           |
| Rheumatoid<br>Arthritis | C<br>00<br>03<br>87<br>3 | PO<br>TE<br>F   | 7<br>2<br>8<br>3<br>7<br>8 | A5A3<br>E0 | POTE ankyrin<br>domain family<br>member F                                           |                                    | 21<br>5 | 0<br>.<br>4<br>8<br>1 | 0<br>.<br>8<br>8<br>5 | 5.<br>4<br>5<br>E<br>-<br>0<br>6 | 0.<br>02 |  | 1       | 2 | 0 | 20<br>18 | 2<br>0<br>1<br>9 |
| Rheumatoid<br>Arthritis | C<br>00<br>03<br>87<br>3 | TN<br>FR<br>SF4 | 7<br>2<br>9<br>3           | P4348<br>9 | TNF receptor<br>superfamily<br>member 4                                             |                                    | 12<br>3 | 0<br>.<br>5<br>4<br>7 | 0<br>.<br>6<br>9<br>2 | 0.<br>0<br>0<br>0<br>1<br>5<br>1 | 0.<br>02 |  | 1       | 2 | 0 | 20<br>17 | 2<br>0<br>1<br>9 |
| Rheumatoid<br>Arthritis | C<br>00<br>03<br>87<br>3 | TY<br>RO<br>BP  | 7<br>3<br>0<br>5           | O439<br>14 | transmembran<br>e immune<br>signaling<br>adaptor<br>TYROBP                          |                                    | 13<br>5 | 0<br>.<br>5<br>7<br>3 | 0<br>.<br>7<br>6<br>9 | 0.<br>2<br>0<br>2<br>3<br>8      | 0.<br>02 |  | 0.<br>5 | 2 | 0 | 20<br>14 | 2<br>0<br>1<br>5 |
| Rheumatoid<br>Arthritis | C<br>00<br>03<br>87<br>3 | UQ<br>CR<br>FS1 | 7<br>3<br>8<br>6           | P4798<br>5 | ubiquinol-<br>cytochrome c<br>reductase,<br>Rieske iron-<br>sulfur<br>polypeptide 1 |                                    | 10<br>9 | 0<br>.<br>5<br>5<br>8 | 0<br>.<br>6<br>5<br>4 | 0.<br>1<br>8<br>9<br>2<br>3      | 0.<br>02 |  | 1       | 2 | 0 | 19<br>94 | 1<br>9<br>9<br>6 |
| Rheumatoid<br>Arthritis | C<br>00<br>03<br>87<br>3 | VP<br>RE<br>B1  | 7<br>4<br>4<br>1           | P1201<br>8 | V-set<br>pre-B<br>cell<br>surrogate<br>light<br>chain 1                             | Im<br>mu<br>ne<br>res<br>po<br>nse | 28      | 0<br>.<br>6<br>9<br>5 | 0<br>.<br>5<br>9      | 0.<br>0<br>9<br>6<br>4<br>9<br>1 | 0.<br>02 |  | 1       | 2 | 0 | 20<br>11 | 2<br>0<br>1<br>4 |
| Rheumatoid<br>Arthritis | C<br>00<br>03<br>87<br>3 | W<br>AR<br>S1   | 7<br>4<br>5<br>3           | P2338<br>1 | tryptoph<br>anyl-<br>tRNA<br>synthetase 1                                           | En<br>zy<br>me                     | 60      | 0<br>.<br>6<br>5      | 0<br>.<br>6<br>5<br>4 | 0.<br>3<br>0<br>2<br>8<br>8      | 0.<br>02 |  | 1       | 2 | 0 | 20<br>15 | 2<br>0<br>1<br>9 |

|                      |          |         |       |        |                                                                             |                      |     |       |       |          |      |  |     |   |   |      |      |
|----------------------|----------|---------|-------|--------|-----------------------------------------------------------------------------|----------------------|-----|-------|-------|----------|------|--|-----|---|---|------|------|
| Rheumatoid Arthritis | C0003873 | WNT3    | 7473  | P56703 | Wnt family member 3                                                         | Signaling            | 140 | 0.536 | 0.808 | 0.875    | 0.02 |  | 0.5 | 2 | 0 | 2009 | 2018 |
| Rheumatoid Arthritis | C0003873 | WNT10B  | 7480  | O00744 | Wnt family member 10B                                                       | Signaling            | 90  | 0.576 | 0.654 | 0.000362 | 0.02 |  | 1   | 2 | 0 | 2006 | 2014 |
| Rheumatoid Arthritis | C0003873 | YWHAZ   | 7534  | P63104 | tyrosine 3-monooxygenase/tryptophan 5-monooxygenase activation protein zeta | Chaperone            | 247 | 0.475 | 0.846 | 0.9365   | 0.02 |  | 1   | 2 | 0 | 2004 | 2011 |
| Rheumatoid Arthritis | C0003873 | CA1     | 759   | P00915 | carbonic anhydrase 1                                                        |                      | 66  | 0.623 | 0.769 | 4.75E-11 | 0.02 |  | 1   | 2 | 1 | 2001 | 2018 |
| Rheumatoid Arthritis | C0003873 | IL1R2   | 7850  | P27930 | interleukin 1 receptor type 2                                               | Receptor             | 76  | 0.593 | 0.846 | 6.5E-15  | 0.02 |  | 1   | 2 | 0 | 2012 | 2018 |
| Rheumatoid Arthritis | C0003873 | IRX1    | 79192 | P78414 | iroquois homeobox 1                                                         | Transcription factor | 28  | 0.695 | 0.538 | 0.00477  | 0.02 |  | 1   | 2 | 0 | 2013 | 2016 |
| Rheumatoid Arthritis | C0003873 | ADIPOR2 | 796   | Q86V24 | adiponectin                                                                 | Receptor             | 103 | 0.5   | 0.7   | 0.36     | 0.02 |  | 1   | 2 | 1 | 2009 | 2010 |

|                                                 |                          |                |                       |            |                                                                        |                                       |         |                       |                       |                                  |          |  |   |   |   |          |                  |
|-------------------------------------------------|--------------------------|----------------|-----------------------|------------|------------------------------------------------------------------------|---------------------------------------|---------|-----------------------|-----------------------|----------------------------------|----------|--|---|---|---|----------|------------------|
| to<br>id<br>Ar<br>thr<br>itis                   | 87<br>3                  |                | 0<br>2                |            | receptor<br>2                                                          | ptor                                  |         | 6<br>4                | 3<br>1                | 2<br>1<br>8                      |          |  |   |   |   |          | 1<br>1           |
| Rh<br>eu<br>ma<br>toi<br>d<br>Ar<br>thr<br>itis | C<br>00<br>03<br>87<br>3 | RH<br>BD<br>F2 | 7<br>9<br>6<br>5<br>1 | Q6PJ<br>F5 | rhomboid<br>5<br>homolog<br>2                                          | En<br>zy<br>me                        | 90      | 0<br>.<br>5<br>9<br>5 | 0<br>.<br>5<br>3<br>8 | 0.<br>0<br>1<br>1<br>9<br>2      | 0.<br>02 |  | 1 | 2 | 0 | 20<br>18 | 2<br>0<br>1<br>9 |
| Rh<br>eu<br>ma<br>toi<br>d<br>Ar<br>thr<br>itis | C<br>00<br>03<br>87<br>3 | AS<br>RG<br>L1 | 8<br>0<br>1<br>5<br>0 | Q7L2<br>66 | asparaginase and<br>isoaspartyl<br>peptidase 1                         | En<br>zy<br>me                        | 20<br>5 | 0<br>.<br>4<br>9<br>4 | 0<br>.<br>8<br>0<br>8 | 2.<br>7<br>6<br>E<br>-<br>0<br>5 | 0.<br>02 |  | 1 | 2 | 0 | 20<br>03 | 2<br>0<br>1<br>9 |
| Rh<br>eu<br>ma<br>toi<br>d<br>Ar<br>thr<br>itis | C<br>00<br>03<br>87<br>3 | TA<br>M        | 8<br>2<br>0<br>5      |            | Myeloproliferative<br>syndrome,<br>transient<br>(transient<br>abnormal |                                       | 14<br>1 | 0<br>.<br>5<br>2<br>8 | 0<br>.<br>7<br>3<br>1 |                                  | 0.<br>02 |  | 1 | 2 | 0 | 20<br>17 | 2<br>0<br>1<br>8 |
| Rh<br>eu<br>ma<br>toi<br>d<br>Ar<br>thr<br>itis | C<br>00<br>03<br>87<br>3 | CA<br>PG       | 8<br>2<br>2           | P4012<br>1 | capping<br>actin<br>protein,<br>gelsolin<br>like                       | Ce<br>llul<br>ar<br>str<br>uct<br>ure | 11<br>1 | 0<br>.<br>5<br>4<br>8 | 0<br>.<br>7<br>3<br>1 | 9.<br>3<br>6<br>E<br>-<br>1<br>4 | 0.<br>02 |  | 1 | 2 | 0 | 20<br>18 | 2<br>0<br>1<br>9 |
| Rh<br>eu<br>ma<br>toi<br>d<br>Ar<br>thr<br>itis | C<br>00<br>03<br>87<br>3 | FC<br>RL<br>4  | 8<br>3<br>4<br>1<br>7 | Q96P<br>J5 | Fc<br>receptor<br>like 4                                               | Ce<br>ll<br>ad<br>hes<br>ion          | 35      | 0<br>.<br>6<br>7      | 0<br>.<br>5           | 7.<br>9<br>1<br>E<br>-<br>1<br>0 | 0.<br>02 |  | 1 | 2 | 0 | 20<br>15 | 2<br>0<br>1<br>7 |
| Rh<br>eu<br>ma<br>toi<br>d<br>Ar<br>thr<br>itis | C<br>00<br>03<br>87<br>3 | JA<br>M3       | 8<br>3<br>7<br>0<br>0 | Q9BX<br>67 | junctional<br>adhesion<br>molecule 3                                   |                                       | 66      | 0<br>.<br>6<br>1<br>9 | 0<br>.<br>6<br>5<br>4 | 0.<br>0<br>0<br>0<br>6<br>1<br>6 | 0.<br>02 |  | 1 | 2 | 0 | 20<br>07 | 2<br>0<br>0<br>8 |



|                      |          |          |       |        |                                                  |        |     |       |          |          |      |  |     |   |   |      |      |
|----------------------|----------|----------|-------|--------|--------------------------------------------------|--------|-----|-------|----------|----------|------|--|-----|---|---|------|------|
| Rheumatoid Arthritis | C0003873 | LOH19CR1 | 8378  |        | loss of heterozygosity, 19, chromosomal region 1 |        | 96  | 0.569 | 0.808    |          | 0.02 |  | 1   | 2 | 0 | 2017 | 2019 |
| Rheumatoid Arthritis | C0003873 | CASP5    | 838   | P51878 | caspase 5                                        | Enzyme | 47  | 0.653 | 0.55E-16 | 1.75E-16 | 0.02 |  | 0.5 | 2 | 2 | 2017 | 2018 |
| Rheumatoid Arthritis | C0003873 | ROPN1L   | 83853 | Q96C74 | rhophilin associated tail protein 1 like         |        | 62  | 0.617 | 0.692    | 2.75E-06 | 0.02 |  | 1   | 2 | 0 | 2004 | 2018 |
| Rheumatoid Arthritis | C0003873 | CASP7    | 8440  | P55210 | caspase 7                                        | Enzyme | 83  | 0.581 | 0.654    | 5.36E-05 | 0.02 |  | 0.5 | 2 | 1 | 2007 | 2008 |
| Rheumatoid Arthritis | C0003873 | NLRC5    | 84166 | Q86WI3 | NLR family CARD domain containing 5              | Enzyme | 47  | 0.653 | 0.52E-08 | 9.42E-08 | 0.02 |  | 1   | 2 | 0 | 2017 | 2019 |
| Rheumatoid Arthritis | C0003873 | MINDY4   | 84182 | Q4G0A6 | MINDY lysine 48 deubiquitinase                   |        | 122 | 0.538 | 0.731    | 3.22E-19 | 0.02 |  | 1   | 2 | 0 | 2013 | 2018 |
| Rheumatoid Ar        | C0003873 | CUL1     | 8454  | Q13616 | cullin 1                                         | Enzyme | 58  | 0.617 | 0.615    | 1        | 0.02 |  | 1   | 2 | 0 | 2005 | 2011 |

|                                                 |                          |                       |                       |            |                                                                  |                                         |         |                       |                                 |                                  |          |  |         |   |   |          |                  |
|-------------------------------------------------|--------------------------|-----------------------|-----------------------|------------|------------------------------------------------------------------|-----------------------------------------|---------|-----------------------|---------------------------------|----------------------------------|----------|--|---------|---|---|----------|------------------|
| thr<br>itis                                     |                          |                       |                       |            |                                                                  |                                         |         |                       |                                 |                                  |          |  |         |   |   |          |                  |
| Rh<br>eu<br>ma<br>toi<br>d<br>Ar<br>thr<br>itis | C<br>00<br>03<br>87<br>3 | IL1<br>7R<br>C        | 8<br>4<br>8<br>1<br>8 | Q8N<br>AC3 | interleukin 17<br>receptor C                                     |                                         | 65      | 0<br>.<br>6<br>3<br>3 | 0<br>.<br>6<br>1<br>5           | 2.<br>3<br>E<br>-<br>1<br>4      | 0.<br>02 |  | 0.<br>5 | 2 | 0 | 20<br>13 | 2<br>0<br>1<br>8 |
| Rh<br>eu<br>ma<br>toi<br>d<br>Ar<br>thr<br>itis | C<br>00<br>03<br>87<br>3 | SE<br>MA<br>7A        | 8<br>4<br>8<br>2      | O753<br>26 | semapho<br>rin 7A<br>(John<br>Milton<br>Hagen<br>blood<br>group) | Sig<br>nal<br>ing                       | 53      | 0<br>.<br>6<br>3<br>6 | 0<br>.<br>6<br>1<br>5           | 0.<br>1<br>7<br>9<br>7<br>6      | 0.<br>02 |  | 1       | 2 | 0 | 20<br>17 | 2<br>0<br>2<br>0 |
| Rh<br>eu<br>ma<br>toi<br>d<br>Ar<br>thr<br>itis | C<br>00<br>03<br>87<br>3 | UB<br>AS<br>H3<br>B   | 8<br>4<br>9<br>5<br>9 | Q8TF<br>42 | ubiquitin<br>associated and<br>SH3 domain<br>containing B        |                                         | 10<br>4 | 0<br>.<br>5<br>6<br>1 | 0<br>.<br>7<br>6<br>9           | 4.<br>7<br>1<br>E<br>-<br>0<br>5 | 0.<br>02 |  | 1       | 2 | 0 | 19<br>98 | 2<br>0<br>1<br>7 |
| Rh<br>eu<br>ma<br>toi<br>d<br>Ar<br>thr<br>itis | C<br>00<br>03<br>87<br>3 | CA<br>V1              | 8<br>5<br>7           | Q031<br>35 | caveolin<br>1                                                    | En<br>zy<br>me<br>mo<br>dul<br>ato<br>r | 63<br>3 | 0<br>.<br>3<br>8<br>8 | 0<br>.<br>8<br>8<br>5           | 0.<br>0<br>0<br>8<br>2<br>7<br>4 | 0.<br>02 |  | 1       | 2 | 0 | 20<br>17 | 2<br>0<br>1<br>8 |
| Rh<br>eu<br>ma<br>toi<br>d<br>Ar<br>thr<br>itis | C<br>00<br>03<br>87<br>3 | SE<br>RPI<br>NH<br>1  | 8<br>7<br>1           | P5045<br>4 | serpin<br>family H<br>member<br>1                                | En<br>zy<br>me<br>mo<br>dul<br>ato<br>r | 14<br>8 | 0<br>.<br>5<br>4<br>5 | 0<br>.<br>7<br>6<br>9           | 0.<br>0<br>2<br>7<br>5<br>5<br>3 | 0.<br>02 |  | 1       | 2 | 0 | 19<br>98 | 2<br>0<br>0<br>5 |
| Rh<br>eu<br>ma<br>toi<br>d<br>Ar<br>thr<br>itis | C<br>00<br>03<br>87<br>3 | TN<br>FS<br>F12       | 8<br>7<br>4<br>2      | O435<br>08 | TNF<br>superfamily<br>member 12                                  |                                         | 12<br>3 | 0<br>.<br>5<br>5<br>6 | 0<br>.<br>7<br>6<br>9<br>9<br>7 | 0.<br>7<br>6<br>9<br>9<br>7      | 0.<br>02 |  | 1       | 2 | 0 | 20<br>07 | 2<br>0<br>1<br>2 |
| Rh<br>eu<br>ma<br>toi                           | C<br>00<br>03            | TN<br>FR<br>SF1<br>0B | 8<br>7<br>9<br>5      | O147<br>63 | TNF receptor<br>superfamily<br>member 10b                        |                                         | 17<br>9 | 0<br>.<br>5           | 0<br>.<br>7                     | 0.<br>0<br>0<br>0                | 0.<br>02 |  | 1       | 2 | 0 | 20<br>03 | 2<br>0<br>0<br>5 |

|                                                 |                          |                 |                  |            |                                                                  |                                             |         |                       |                       |                                  |          |  |         |   |   |          |                  |
|-------------------------------------------------|--------------------------|-----------------|------------------|------------|------------------------------------------------------------------|---------------------------------------------|---------|-----------------------|-----------------------|----------------------------------|----------|--|---------|---|---|----------|------------------|
| d<br>Ar<br>thr<br>itis                          | 87<br>3                  |                 |                  |            |                                                                  |                                             |         | 0<br>5                | 6<br>9                | 1<br>9<br>9                      |          |  |         |   |   |          |                  |
| Rh<br>eu<br>ma<br>toi<br>d<br>Ar<br>thr<br>itis | C<br>00<br>03<br>87<br>3 | IL1<br>8R<br>AP | 8<br>8<br>0<br>7 | O952<br>56 | interleuk<br>in 18<br>receptor<br>accessor<br>y protein          | Re<br>ce<br>pto<br>r                        | 41      | 0<br>.<br>6<br>7<br>4 | 0<br>.<br>5<br>7<br>7 | 0.<br>0<br>2<br>1<br>8           | 0.<br>02 |  | 1       | 2 | 0 | 20<br>03 | 2<br>0<br>1<br>7 |
| Rh<br>eu<br>ma<br>toi<br>d<br>Ar<br>thr<br>itis | C<br>00<br>03<br>87<br>3 | NR<br>P1        | 8<br>8<br>2<br>9 | O147<br>86 | neuropilin 1                                                     |                                             | 24<br>6 | 0<br>.<br>4<br>7<br>6 | 0<br>.<br>8<br>0<br>8 | 0.<br>9<br>8<br>5<br>8<br>4      | 0.<br>02 |  | 1       | 2 | 0 | 20<br>06 | 2<br>0<br>1<br>2 |
| Rh<br>eu<br>ma<br>toi<br>d<br>Ar<br>thr<br>itis | C<br>00<br>03<br>87<br>3 | CC<br>N6        | 8<br>8<br>3<br>8 | O953<br>89 | cellular<br>commun<br>ication<br>network<br>factor 6             | Sig<br>nal<br>ing                           | 12<br>6 | 0<br>.<br>5<br>6<br>8 | 0<br>.<br>7<br>3<br>1 | 0.<br>0<br>0<br>6<br>1<br>9      | 0.<br>02 |  | 1       | 2 | 0 | 20<br>04 | 2<br>0<br>1<br>5 |
| Rh<br>eu<br>ma<br>toi<br>d<br>Ar<br>thr<br>itis | C<br>00<br>03<br>87<br>3 | SP<br>HK<br>1   | 8<br>8<br>7<br>7 | Q9N<br>YA1 | sphingos<br>ine<br>kinase 1                                      | Ki<br>nas<br>e                              | 23<br>6 | 0<br>.<br>4<br>8      | 0<br>.<br>8<br>0<br>8 | 3.<br>0<br>3<br>E<br>-<br>0<br>7 | 0.<br>02 |  | 1       | 2 | 0 | 20<br>14 | 2<br>0<br>1<br>9 |
| Rh<br>eu<br>ma<br>toi<br>d<br>Ar<br>thr<br>itis | C<br>00<br>03<br>87<br>3 | MB<br>D4        | 8<br>9<br>3<br>0 | O952<br>43 | methyl-<br>CpG<br>binding<br>domain<br>4, DNA<br>glycosyl<br>ase | En<br>zy<br>me                              | 62      | 0<br>.<br>6<br>1      | 0<br>.<br>6<br>1<br>5 | 1.<br>9<br>7<br>E<br>-<br>1<br>4 | 0.<br>02 |  | 0.<br>5 | 2 | 2 | 20<br>12 | 2<br>0<br>1<br>2 |
| Rh<br>eu<br>ma<br>toi<br>d<br>Ar<br>thr<br>itis | C<br>00<br>03<br>87<br>3 | MB<br>D2        | 8<br>9<br>3<br>2 | Q9UB<br>B5 | methyl-<br>CpG<br>binding<br>domain<br>protein 2                 | Ep<br>ige<br>net<br>ic<br>reg<br>ula<br>tor | 25<br>6 | 0<br>.<br>4<br>6<br>6 | 0<br>.<br>8<br>4<br>6 | 0.<br>3<br>4<br>9<br>5<br>7      | 0.<br>02 |  | 1       | 2 | 0 | 20<br>18 | 2<br>0<br>1<br>9 |

|                      |          |           |       |        |                                                            |     |       |       |           |      |  |     |   |   |      |      |
|----------------------|----------|-----------|-------|--------|------------------------------------------------------------|-----|-------|-------|-----------|------|--|-----|---|---|------|------|
| Rheumatoid Arthritis | C0003873 | PGLYRP1   | 8993  | O75594 | peptidoglycan recognition protein 1                        | 20  | 0.78  | 0.346 | 1.79E-05  | 0.02 |  | 1   | 2 | 1 | 2015 | 2019 |
| Rheumatoid Arthritis | C0003873 | PS TPI P1 | 9051  | O43586 | proline-serine-threonine phosphatase interacting protein 1 | 54  | 0.65  | 0.577 | 2.46E-06  | 0.02 |  | 1   | 2 | 0 | 2002 | 2016 |
| Rheumatoid Arthritis | C0003873 | CD1D      | 912   | P15813 | CD1d molecule                                              | 140 | 0.532 | 0.769 | 1.88E-06  | 0.02 |  | 1   | 2 | 0 | 2003 | 2009 |
| Rheumatoid Arthritis | C0003873 | PD CD5    | 9141  | O14737 | programmed cell death 5                                    | 67  | 0.61  | 0.538 | 0.0033642 | 0.02 |  | 1   | 2 | 0 | 2007 | 2013 |
| Rheumatoid Arthritis | C0003873 | INTS4     | 92105 | Q96HW7 | integrator complex subunit 4                               | 23  | 0.705 | 0.538 | 1.13E-11  | 0.02 |  | 0.5 | 2 | 0 | 2009 | 2018 |
| Rheumatoid Arthritis | C0003873 | CD8A      | 925   | P01732 | CD8a molecule                                              | 87  | 0.587 | 0.769 | 1.68E-05  | 0.02 |  | 0.5 | 2 | 0 | 1992 | 1992 |
| Rheumatoid Arthritis | C0003873 | DN ER     | 92737 | Q8NFT8 | delta/notch like EGF repeat containing                     | 203 | 0.493 | 0.769 | 0.18599   | 0.02 |  | 1   | 2 | 0 | 2016 | 2019 |

|                                                 |                          |                     |                  |                           |                                                                                 |                                                |         |                       |                       |                                  |          |  |         |   |   |          |                  |
|-------------------------------------------------|--------------------------|---------------------|------------------|---------------------------|---------------------------------------------------------------------------------|------------------------------------------------|---------|-----------------------|-----------------------|----------------------------------|----------|--|---------|---|---|----------|------------------|
| Ar<br>thr<br>itis                               |                          |                     |                  |                           |                                                                                 |                                                |         |                       |                       |                                  |          |  |         |   |   |          |                  |
| Rh<br>eu<br>ma<br>toi<br>d<br>Ar<br>thr<br>itis | C<br>00<br>03<br>87<br>3 | KL<br>F4            | 9<br>3<br>1<br>4 | O434<br>74                | Kruppel<br>like<br>factor 4                                                     | Nu<br>cle<br>ic<br>aci<br>d<br>bin<br>din<br>g | 30<br>7 | 0<br>.<br>4<br>4<br>9 | 0<br>.<br>7<br>6<br>9 | 0.<br>9<br>7<br>1<br>4           | 0.<br>02 |  | 1       | 2 | 0 | 20<br>16 | 2<br>0<br>1<br>8 |
| Rh<br>eu<br>ma<br>toi<br>d<br>Ar<br>thr<br>itis | C<br>00<br>03<br>87<br>3 | CD<br>22            | 9<br>3<br>3      | P2027<br>3                | CD22<br>molecule                                                                |                                                | 10<br>6 | 0<br>.<br>5<br>5<br>6 | 0<br>.<br>6<br>1<br>5 | 0.<br>8<br>0<br>4<br>4           | 0.<br>02 |  | 1       | 2 | 0 | 19<br>99 | 2<br>0<br>1<br>9 |
| Rh<br>eu<br>ma<br>toi<br>d<br>Ar<br>thr<br>itis | C<br>00<br>03<br>87<br>3 | TN<br>FR<br>SF8     | 9<br>4<br>3      | P2890<br>8                | TNF receptor<br>superfamily<br>member 8                                         |                                                | 30<br>1 | 0<br>.<br>4<br>4<br>4 | 0<br>.<br>8<br>0<br>8 | 0.<br>8<br>6<br>4<br>0<br>7      | 0.<br>02 |  | 1       | 2 | 0 | 20<br>00 | 2<br>0<br>0<br>3 |
| Rh<br>eu<br>ma<br>toi<br>d<br>Ar<br>thr<br>itis | C<br>00<br>03<br>87<br>3 | AD<br>AM<br>TS<br>3 | 9<br>5<br>0<br>8 | O150<br>72                | ADAM<br>metallo<br>peptidase<br>with<br>thrombo<br>spondin<br>type 1<br>motif 3 | En<br>zy<br>me                                 | 11<br>6 | 0<br>.<br>5<br>8<br>1 | 0<br>.<br>8<br>0<br>8 | 1.<br>0<br>3<br>E<br>-<br>1<br>0 | 0.<br>02 |  | 1       | 2 | 0 | 20<br>12 | 2<br>0<br>1<br>5 |
| Rh<br>eu<br>ma<br>toi<br>d<br>Ar<br>thr<br>itis | C<br>00<br>03<br>87<br>3 | TB<br>PL<br>1       | 9<br>5<br>1<br>9 | P6238<br>0                | TATA-<br>box<br>binding<br>protein<br>like 1                                    | Tr<br>ans<br>cri<br>pti<br>on<br>fac<br>tor    | 19<br>8 | 0<br>.<br>5<br>0<br>6 | 0<br>.<br>8<br>4<br>6 | 0.<br>3<br>7<br>9<br>0<br>2      | 0.<br>02 |  | 0.<br>5 | 2 | 0 | 20<br>00 | 2<br>0<br>1<br>9 |
| Rh<br>eu<br>ma<br>toi<br>d<br>Ar<br>thr<br>itis | C<br>00<br>03<br>87<br>3 | CC<br>L4<br>L2      | 9<br>5<br>6<br>0 | P1323<br>6;Q8<br>NHW<br>4 | C-C motif<br>chemokine<br>ligand 4 like 2                                       |                                                | 13<br>3 | 0<br>.<br>5<br>3<br>5 | 0<br>.<br>8<br>8<br>5 | 0.<br>0<br>8<br>8<br>5<br>8<br>6 | 0.<br>02 |  | 1       | 2 | 0 | 19<br>94 | 1<br>9<br>9<br>5 |
| Rh<br>eu<br>ma                                  | C<br>00<br>03            | CD<br>48            | 9<br>6<br>2      | P0932<br>6                | CD48<br>molecule                                                                |                                                | 74      | 0<br>.<br>5           | 0<br>.<br>6           | 1.<br>7<br>3                     | 0.<br>02 |  | 1       | 2 | 0 | 19<br>90 | 1<br>9           |

|                                                 |                          |                |                  |            |                                                                                 |                                                    |         |                       |                       |                                  |          |  |   |   |   |          |                  |
|-------------------------------------------------|--------------------------|----------------|------------------|------------|---------------------------------------------------------------------------------|----------------------------------------------------|---------|-----------------------|-----------------------|----------------------------------|----------|--|---|---|---|----------|------------------|
| to<br>id<br>Ar<br>thr<br>itis                   | 87<br>3                  |                |                  |            |                                                                                 |                                                    |         | 9<br>2                | 9<br>2                | E<br>-<br>0<br>5                 |          |  |   |   |   |          | 9<br>0           |
| Rh<br>eu<br>ma<br>toi<br>d<br>Ar<br>thr<br>itis | C<br>00<br>03<br>87<br>3 | IK<br>BK<br>E  | 9<br>6<br>4<br>1 | Q141<br>64 | inhibitor<br>of<br>nuclear<br>factor<br>kappa B<br>kinase<br>subunit<br>epsilon | Ki<br>nas<br>e                                     | 79      | 0<br>.<br>5<br>9<br>7 | 0<br>.<br>7<br>3<br>1 | 0.<br>0<br>0<br>0<br>5           | 0.<br>02 |  | 1 | 2 | 0 | 20<br>05 | 2<br>0<br>1<br>7 |
| Rh<br>eu<br>ma<br>toi<br>d<br>Ar<br>thr<br>itis | C<br>00<br>03<br>87<br>3 | SD<br>C3       | 9<br>6<br>7<br>2 | O750<br>56 | syndeca<br>n 3                                                                  | Ex<br>tra<br>cel<br>lul<br>ar<br>str<br>uct<br>ure | 30      | 0<br>.<br>7<br>1<br>1 | 0<br>.<br>6<br>5<br>4 | 0.<br>4<br>1<br>4<br>5<br>5      | 0.<br>02 |  | 1 | 2 | 0 | 20<br>05 | 2<br>0<br>1<br>9 |
| Rh<br>eu<br>ma<br>toi<br>d<br>Ar<br>thr<br>itis | C<br>00<br>03<br>87<br>3 | FA<br>M5<br>3B | 9<br>6<br>7<br>9 | Q141<br>53 | family<br>sequence<br>similarity<br>member B                                    | with<br>53                                         | 28      | 0<br>.<br>7<br>1<br>6 | 0<br>.<br>4<br>2<br>3 | 0.<br>8<br>5<br>5<br>2<br>3      | 0.<br>02 |  | 1 | 2 | 0 | 20<br>10 | 2<br>0<br>1<br>7 |
| Rh<br>eu<br>ma<br>toi<br>d<br>Ar<br>thr<br>itis | C<br>00<br>03<br>87<br>3 | CD<br>70       | 9<br>7<br>0      | P3297<br>0 | CD70<br>molecule                                                                |                                                    | 12<br>7 | 0<br>.<br>5<br>4<br>2 | 0<br>.<br>6<br>9<br>2 | 0.<br>0<br>1<br>0<br>3<br>9<br>4 | 0.<br>02 |  | 1 | 2 | 0 | 20<br>07 | 2<br>0<br>1<br>6 |
| Rh<br>eu<br>ma<br>toi<br>d<br>Ar<br>thr<br>itis | C<br>00<br>03<br>87<br>3 | HD<br>AC<br>9  | 9<br>7<br>3<br>4 | Q9U<br>KV0 | histone<br>deacetyl<br>ase 9                                                    | Ep<br>ige<br>net<br>ic<br>reg<br>ula<br>tor        | 34<br>0 | 0<br>.<br>4<br>3<br>9 | 0<br>.<br>8<br>4<br>6 | 0.<br>9<br>9<br>7<br>3           | 0.<br>02 |  | 1 | 2 | 0 | 20<br>12 | 2<br>0<br>1<br>5 |
| Rh<br>eu<br>ma<br>toi<br>d<br>Ar<br>thr<br>itis | C<br>00<br>03<br>87<br>3 | AD<br>GR<br>E5 | 9<br>7<br>6      | P4896<br>0 | adhesion<br>G<br>protein-<br>coupled<br>receptor<br>E5                          | G-<br>pro<br>tei<br>n<br>co<br>upl<br>ed<br>rec    | 74      | 0<br>.<br>6<br>0<br>1 | 0<br>.<br>5<br>3<br>8 | 3.<br>0<br>8<br>E<br>-<br>0<br>6 | 0.<br>02 |  | 1 | 2 | 0 | 20<br>00 | 2<br>0<br>1<br>0 |

|                      |          |            |       |        |                                                     |             |     |       |       |          |      |  |   |   |   |      |      |
|----------------------|----------|------------|-------|--------|-----------------------------------------------------|-------------|-----|-------|-------|----------|------|--|---|---|---|------|------|
|                      |          |            |       |        |                                                     | ept<br>or   |     |       |       |          |      |  |   |   |   |      |      |
| Rheumatoid Arthritis | C0003873 | PIEZO1     | 9780  | Q92508 | piezo type mechanosensitive ion channel component 1 | Ion channel | 130 | 0.552 | 0.769 | 3.94E-21 | 0.02 |  | 1 | 2 | 0 | 2001 | 2002 |
| Rheumatoid Arthritis | C0003873 | KEAP1      | 9817  | Q14145 | kelch like ECH associated protein 1                 | like        | 251 | 0.475 | 0.808 | 0.00388  | 0.02 |  | 1 | 2 | 0 | 2018 | 2019 |
| Rheumatoid Arthritis | C0003873 | SPATA2     | 9825  | Q9UM82 | spermatogenesis associated 2                        |             | 107 | 0.556 | 0.615 | 0.9889   | 0.02 |  | 1 | 2 | 0 | 2004 | 2017 |
| Rheumatoid Arthritis | C0003873 | CDKN2B-AS1 | 1E+08 |        | CDKN2B antisense RNA 1                              |             | 213 | 0.491 | 0.769 |          | 0.01 |  | 1 | 1 | 3 | 2019 | 2019 |
| Rheumatoid Arthritis | C0003873 | TEC        | 1E+08 |        | transient erythroblastopenia of childhood           |             | 40  | 0.659 | 0.577 |          | 0.01 |  | 1 | 1 | 0 | 2017 | 2017 |
| Rheumatoid Arthritis | C0003873 | MIR708     | 1E+08 |        | microRNA 708                                        |             | 86  | 0.572 | 0.692 |          | 0.01 |  | 1 | 1 | 0 | 2018 | 2018 |
| Rheumatoid           | C0003873 | MIR887     | 1E+   |        | microRNA 887                                        |             | 6   | 0.8   | 0.2   |          | 0.01 |  | 1 | 1 | 0 | 2017 | 2017 |

|                                                 |                          |                       |                       |            |                                                       |                                             |         |                       |                       |                        |          |  |   |   |   |          |                  |
|-------------------------------------------------|--------------------------|-----------------------|-----------------------|------------|-------------------------------------------------------|---------------------------------------------|---------|-----------------------|-----------------------|------------------------|----------|--|---|---|---|----------|------------------|
| d<br>Ar<br>thr<br>itis                          | 87<br>3                  |                       | 0<br>8                |            |                                                       |                                             |         | 3<br>9                | 3<br>1                |                        |          |  |   |   |   |          |                  |
| Rh<br>eu<br>ma<br>toi<br>d<br>Ar<br>thr<br>itis | C<br>00<br>03<br>87<br>3 | C2<br>0or<br>f18<br>1 | 1<br>E<br>+<br>0<br>8 |            | chromosome<br>20 open<br>reading frame<br>181         |                                             | 24<br>6 | 0<br>.<br>4<br>7<br>9 | 0<br>.<br>8<br>8<br>5 |                        | 0.<br>01 |  | 1 | 1 | 0 | 20<br>19 | 2<br>0<br>1<br>9 |
| Rh<br>eu<br>ma<br>toi<br>d<br>Ar<br>thr<br>itis | C<br>00<br>03<br>87<br>3 | HD<br>AC<br>6         | 1<br>0<br>0<br>1<br>3 | Q9UB<br>N7 | histone<br>deacetyl<br>ase 6                          | Ep<br>ige<br>net<br>ic<br>reg<br>ula<br>tor | 28<br>8 | 0<br>.<br>4<br>6<br>5 | 0<br>.<br>8<br>4<br>6 | 1                      | 0.<br>01 |  | 0 | 1 | 0 | 20<br>16 | 2<br>0<br>1<br>6 |
| Rh<br>eu<br>ma<br>toi<br>d<br>Ar<br>thr<br>itis | C<br>00<br>03<br>87<br>3 | HD<br>AC<br>5         | 1<br>0<br>0<br>1<br>4 | Q9U<br>QL6 | histone<br>deacetyl<br>ase 5                          | Ep<br>ige<br>net<br>ic<br>reg<br>ula<br>tor | 11<br>4 | 0<br>.<br>5<br>5<br>2 | 0<br>.<br>7<br>6<br>9 | 1                      | 0.<br>01 |  | 1 | 1 | 0 | 20<br>16 | 2<br>0<br>1<br>6 |
| Rh<br>eu<br>ma<br>toi<br>d<br>Ar<br>thr<br>itis | C<br>00<br>03<br>87<br>3 | BC<br>L2<br>L11       | 1<br>0<br>0<br>1<br>8 | O435<br>21 | BCL2 like 11                                          |                                             | 17<br>3 | 0<br>.<br>5<br>1      | 0<br>.<br>7<br>3<br>1 | 0.<br>8<br>8<br>5<br>7 | 0.<br>01 |  | 1 | 1 | 0 | 20<br>15 | 2<br>0<br>1<br>5 |
| Rh<br>eu<br>ma<br>toi<br>d<br>Ar<br>thr<br>itis | C<br>00<br>03<br>87<br>3 | TR<br>AP              | 1<br>E<br>+<br>0<br>8 |            | triiodothyroni<br>ne receptor<br>auxiliary<br>protein |                                             | 80      | 0<br>.<br>5<br>7<br>9 | 0<br>.<br>7<br>3<br>1 |                        | 0.<br>01 |  | 1 | 1 | 0 | 20<br>14 | 2<br>0<br>1<br>4 |
| Rh<br>eu<br>ma<br>toi<br>d<br>Ar<br>thr<br>itis | C<br>00<br>03<br>87<br>3 | MI<br>R1<br>246       | 1<br>E<br>+<br>0<br>8 |            | microRNA<br>1246                                      |                                             | 76      | 0<br>.<br>5<br>9<br>2 | 0<br>.<br>8<br>0<br>8 |                        | 0.<br>01 |  | 1 | 1 | 0 | 20<br>15 | 2<br>0<br>1<br>5 |



|                      |          |              |       |               |                                                  |     |       |       |         |      |  |   |   |   |      |      |
|----------------------|----------|--------------|-------|---------------|--------------------------------------------------|-----|-------|-------|---------|------|--|---|---|---|------|------|
| Rheumatoid Arthritis | C0003873 | MI R1908     | 1E+08 |               | microRNA 1908                                    | 37  | 0.67  | 0.57  |         | 0.01 |  | 1 | 1 | 0 | 2018 | 2018 |
| Rheumatoid Arthritis | C0003873 | TMED7-TICAM2 | 1E+08 | Q86XR7;Q9Y3B3 | TMED7-TICAM2 readthrough                         | 329 | 0.438 | 0.769 | 0.02594 | 0.01 |  | 1 | 1 | 0 | 2005 | 2005 |
| Rheumatoid Arthritis | C0003873 | MI R762      | 1E+08 |               | microRNA 762                                     | 13  | 0.769 | 0.423 |         | 0.01 |  | 1 | 1 | 0 | 2018 | 2018 |
| Rheumatoid Arthritis | C0003873 | AA A1        | 1E+08 |               | aortic aneurysm, familial abdominal 1            | 29  | 0.695 | 0.615 |         | 0.01 |  | 1 | 1 | 0 | 2016 | 2016 |
| Rheumatoid Arthritis | C0003873 | PA RP2       | 10038 | Q9UGN5        | poly(ADP-ribose) polymerase 2                    | 40  | 0.633 | 0.538 | 2.3E-13 | 0.01 |  | 1 | 1 | 0 | 2019 | 2019 |
| Rheumatoid Arthritis | C0003873 | DN AJ B6     | 10049 | O75190        | DnaJ heat shock protein family (Hsp40) member B6 | 65  | 0.659 | 0.462 | 0.85436 | 0.01 |  | 1 | 1 | 0 | 1999 | 1999 |
| Rheumatoid Ar        | C0003873 | SL C17A4     | 10050 | Q9Y2C5        | solute carrier family 17 member 4                | 15  | 0.78  | 0.385 | 1.57E-  | 0.01 |  | 1 | 1 | 0 | 2017 | 2017 |

|                                                 |                          |                              |                                  |            |                                                                                                                  |         |                       |                       |                                  |          |  |   |   |   |          |                  |  |
|-------------------------------------------------|--------------------------|------------------------------|----------------------------------|------------|------------------------------------------------------------------------------------------------------------------|---------|-----------------------|-----------------------|----------------------------------|----------|--|---|---|---|----------|------------------|--|
| thr<br>itis                                     |                          |                              |                                  |            |                                                                                                                  |         |                       |                       | 0<br>9                           |          |  |   |   |   |          |                  |  |
| Rh<br>eu<br>ma<br>toi<br>d<br>Ar<br>thr<br>itis | C<br>00<br>03<br>87<br>3 | GA<br>PLI<br>NC              | 1.<br>0<br>1<br>E<br>+<br>0<br>8 |            | gastric<br>adenocarcino<br>ma associated,<br>positive CD44<br>regulator, long<br>intergenic<br>non-coding<br>RNA | 20      | 0<br>.<br>7<br>3<br>6 | 0<br>.<br>2<br>6<br>9 |                                  | 0.<br>01 |  | 1 | 1 | 0 | 20<br>18 | 2<br>0<br>1<br>8 |  |
| Rh<br>eu<br>ma<br>toi<br>d<br>Ar<br>thr<br>itis | C<br>00<br>03<br>87<br>3 | LO<br>C1<br>005<br>059<br>09 | 1.<br>0<br>1<br>E<br>+<br>0<br>8 |            | histidine-rich<br>glycoprotein                                                                                   | 17      | 0<br>.<br>7<br>2<br>2 | 0<br>.<br>3<br>8<br>5 |                                  | 0.<br>01 |  | 1 | 1 | 0 | 20<br>18 | 2<br>0<br>1<br>8 |  |
| Rh<br>eu<br>ma<br>toi<br>d<br>Ar<br>thr<br>itis | C<br>00<br>03<br>87<br>3 | LO<br>C1<br>005<br>060<br>23 | 1.<br>0<br>1<br>E<br>+<br>0<br>8 |            | uncharacterize<br>d<br>LOC1005060<br>23                                                                          | 1       | 1                     | 0<br>.<br>1<br>1<br>5 |                                  | 0.<br>01 |  | 1 | 1 | 3 | 20<br>16 | 2<br>0<br>1<br>6 |  |
| Rh<br>eu<br>ma<br>toi<br>d<br>Ar<br>thr<br>itis | C<br>00<br>03<br>87<br>3 | CN<br>NM<br>3-<br>DT         | 1.<br>0<br>1<br>E<br>+<br>0<br>8 |            | CNNM3<br>divergent<br>transcript                                                                                 | 1       | 1                     | 0<br>.<br>1<br>1<br>5 |                                  | 0.<br>01 |  | 1 | 1 | 0 | 20<br>16 | 2<br>0<br>1<br>6 |  |
| Rh<br>eu<br>ma<br>toi<br>d<br>Ar<br>thr<br>itis | C<br>00<br>03<br>87<br>3 | OC<br>LN                     | 1.<br>0<br>1<br>E<br>+<br>0<br>8 | Q166<br>25 | occludin                                                                                                         | 19<br>5 | 0<br>.<br>5<br>0<br>7 | 0<br>.<br>8<br>4<br>6 | 8.<br>5<br>6<br>E<br>-<br>0<br>7 | 0.<br>01 |  | 1 | 1 | 0 | 20<br>18 | 2<br>0<br>1<br>8 |  |
| Rh<br>eu<br>ma<br>toi<br>d<br>Ar<br>thr<br>itis | C<br>00<br>03<br>87<br>3 | CA<br>SP1<br>2               | 1.<br>0<br>1<br>E<br>+<br>0<br>8 | Q6U<br>XS9 | caspase 12<br>(gene/pseudog<br>ene)                                                                              | 44      | 0<br>.<br>6<br>3<br>8 | 0<br>.<br>8<br>0<br>8 | 0.<br>0<br>0<br>1<br>2<br>7      | 0.<br>01 |  | 1 | 1 | 0 | 20<br>14 | 2<br>0<br>1<br>4 |  |
| Rh<br>eu<br>ma<br>toi                           | C<br>00<br>03            | H3<br>P43                    | 1.<br>0<br>1<br>E                |            | H3 histone<br>pseudogene 43                                                                                      | 1       | 1                     | 0<br>.<br>1           |                                  | 0.<br>01 |  | 1 | 1 | 0 | 20<br>17 | 2<br>0<br>1<br>7 |  |

|                                                 |                          |                                       |                                  |            |                                                              |                                         |         |                       |                       |                             |          |  |   |   |   |                         |
|-------------------------------------------------|--------------------------|---------------------------------------|----------------------------------|------------|--------------------------------------------------------------|-----------------------------------------|---------|-----------------------|-----------------------|-----------------------------|----------|--|---|---|---|-------------------------|
| d<br>Ar<br>thr<br>itis                          | 87<br>3                  |                                       | +<br>0<br>8                      |            |                                                              |                                         |         | 1<br>5                |                       |                             |          |  |   |   |   |                         |
| Rh<br>eu<br>ma<br>toi<br>d<br>Ar<br>thr<br>itis | C<br>00<br>03<br>87<br>3 | P2<br>RX<br>5-<br>TA<br>X1<br>BP<br>3 | 1.<br>0<br>1<br>E<br>+<br>0<br>8 |            | P2RX5-<br>TAX1BP3<br>readthrough<br>(NMD<br>candidate)       |                                         | 91      | 0<br>.<br>5<br>8<br>8 | 0<br>.<br>7<br>6<br>9 |                             | 0.<br>01 |  | 1 | 1 | 0 | 20<br>10<br>0<br>1<br>0 |
| Rh<br>eu<br>ma<br>toi<br>d<br>Ar<br>thr<br>itis | C<br>00<br>03<br>87<br>3 | DN<br>M1<br>L                         | 1<br>0<br>0<br>5<br>9            | O004<br>29 | dynamini<br>like                                             | En<br>zy<br>me<br>mo<br>dul<br>ato<br>r | 27<br>3 | 0<br>.<br>4<br>7<br>5 | 0<br>.<br>8<br>0<br>8 | 0.<br>0<br>0<br>5<br>6<br>8 | 0.<br>01 |  | 1 | 1 | 0 | 20<br>20<br>0<br>2<br>0 |
| Rh<br>eu<br>ma<br>toi<br>d<br>Ar<br>thr<br>itis | C<br>00<br>03<br>87<br>3 | MI<br>R4<br>701                       | 1.<br>0<br>1<br>E<br>+<br>0<br>8 |            | microRNA<br>4701                                             |                                         | 2       | 0<br>.<br>9<br>3<br>1 | 0<br>.<br>1<br>9<br>2 |                             | 0.<br>01 |  | 1 | 1 | 0 | 20<br>19<br>0<br>1<br>9 |
| Rh<br>eu<br>ma<br>toi<br>d<br>Ar<br>thr<br>itis | C<br>00<br>03<br>87<br>3 | MI<br>R4<br>764                       | 1.<br>0<br>1<br>E<br>+<br>0<br>8 |            | microRNA<br>4764                                             |                                         | 1       | 1                     | 0<br>.<br>1<br>1<br>5 |                             | 0.<br>01 |  | 1 | 1 | 0 | 20<br>15<br>0<br>1<br>5 |
| Rh<br>eu<br>ma<br>toi<br>d<br>Ar<br>thr<br>itis | C<br>00<br>03<br>87<br>3 | PS<br>C                               | 1.<br>0<br>1<br>E<br>+<br>0<br>8 |            | Cholangitis,<br>primary<br>sclerosing                        |                                         | 67      | 0<br>.<br>6<br>0<br>3 | 0<br>.<br>7<br>3<br>1 |                             | 0.<br>01 |  | 1 | 1 | 0 | 19<br>97<br>9<br>9<br>7 |
| Rh<br>eu<br>ma<br>toi<br>d<br>Ar<br>thr<br>itis | C<br>00<br>03<br>87<br>3 | PT<br>PR<br>U                         | 1<br>0<br>0<br>7<br>6            | Q927<br>29 | protein<br>tyrosine<br>phospha<br>tase<br>receptor<br>type U | En<br>zy<br>me                          | 88      | 0<br>.<br>5<br>8<br>1 | 0<br>.<br>6<br>5<br>4 | 0.<br>3<br>9<br>2<br>5<br>1 | 0.<br>01 |  | 1 | 1 | 0 | 20<br>17<br>0<br>1<br>7 |

|                      |          |           |          |         |                                       |                      |     |       |       |          |      |  |   |   |   |      |      |
|----------------------|----------|-----------|----------|---------|---------------------------------------|----------------------|-----|-------|-------|----------|------|--|---|---|---|------|------|
| Rheumatoid Arthritis | C0003873 | MI R5 571 | 1.01E+08 |         | microRNA 5571                         |                      | 3   | 0.89  | 0.154 |          | 0.01 |  | 1 | 1 | 0 | 2019 | 2019 |
| Rheumatoid Arthritis | C0003873 | MI R5 100 | 1.01E+08 |         | microRNA 5100                         |                      | 16  | 0.769 | 0.269 |          | 0.01 |  | 1 | 1 | 0 | 2018 | 2018 |
| Rheumatoid Arthritis | C0003873 | G3 BP 1   | 10146    | Q13283  | G3BP stress granule assembly factor 1 | Nucleic acid binding | 78  | 0.597 | 0.654 | 0.033122 | 0.01 |  | 1 | 1 | 0 | 2003 | 2003 |
| Rheumatoid Arthritis | C0003873 | CH ST 4   | 10164    | Q8NC G5 | carbohydrate sulfotransferase 4       |                      | 12  | 0.792 | 0.269 | 2E-09    | 0.01 |  | 1 | 1 | 0 | 2005 | 2005 |
| Rheumatoid Arthritis | C0003873 | CD K4     | 1019     | P11802  | cyclin dependent kinase 4             | Kinase               | 433 | 0.412 | 0.808 | 0.06299  | 0.01 |  | 1 | 1 | 0 | 2006 | 2006 |
| Rheumatoid Arthritis | C0003873 | CD K7     | 10222    | P50613  | cyclin dependent kinase 7             | Kinase               | 89  | 0.566 | 0.731 | 4.47E-07 | 0.01 |  | 1 | 1 | 0 | 2018 | 2018 |
| Rheumatoid Ar        | C0003873 | GD F11    | 10220    | O95390  | growth differentiation factor 11      | Signaling            | 86  | 0.584 | 0.692 | 0.9645   | 0.01 |  | 1 | 1 | 0 | 2019 | 2019 |

|                      |          |         |         |        |                                                |                  |     |       |       |          |      |  |   |   |   |      |      |
|----------------------|----------|---------|---------|--------|------------------------------------------------|------------------|-----|-------|-------|----------|------|--|---|---|---|------|------|
| thritis              |          |         |         |        |                                                |                  |     |       |       |          |      |  |   |   |   |      |      |
| Rheumatoid Arthritis | C0003873 | RASGRP2 | 10235   | Q7LDG7 | RAS guanyl releasing protein 2                 | Enzyme modulator | 18  | 0.769 | 0.231 | 0.2436   | 0.01 |  | 1 | 1 | 0 | 2018 | 2018 |
| Rheumatoid Arthritis | C0003873 | SLC17A2 | 10246   | O00624 | solute carrier family 17 member 2              | Transporter      | 13  | 0.805 | 0.269 | 1.42E-06 | 0.01 |  | 1 | 1 | 0 | 2018 | 2018 |
| Rheumatoid Arthritis | C0003873 | MIR6089 | 102E+08 |        | microRNA 6089                                  |                  | 2   | 0.931 | 0.192 |          | 0.01 |  | 1 | 1 | 0 | 2019 | 2019 |
| Rheumatoid Arthritis | C0003873 | MIR6716 | 102E+08 |        | microRNA 6716                                  |                  | 6   | 0.861 | 0.192 |          | 0.01 |  | 0 | 1 | 0 | 2017 | 2017 |
| Rheumatoid Arthritis | C0003873 | MIR6785 | 102E+08 |        | microRNA 6785                                  |                  | 2   | 0.931 | 0.154 |          | 0.01 |  | 1 | 1 | 0 | 2019 | 2019 |
| Rheumatoid Arthritis | C0003873 | CDK2AP2 | 10263   | O75956 | cyclin dependent kinase 2 associated protein 2 | Enzyme modulator | 117 | 0.544 | 0.808 | 0.78801  | 0.01 |  | 1 | 1 | 0 | 1990 | 1990 |
| Rheumatoid           | C0003    | IRX5    | 102     | P78411 | iroquois homeobox 5                            | Transcript       | 63  | 0.6   | 0.8   | 0.97     | 0.01 |  | 1 | 1 | 0 | 2019 | 2019 |

|                                                 |                          |                              |                                  |            |                                                                              |                                         |         |                       |                       |                                  |          |  |   |   |   |          |                  |
|-------------------------------------------------|--------------------------|------------------------------|----------------------------------|------------|------------------------------------------------------------------------------|-----------------------------------------|---------|-----------------------|-----------------------|----------------------------------|----------|--|---|---|---|----------|------------------|
| d<br>Ar<br>thr<br>itis                          | 87<br>3                  |                              | 6<br>5                           |            |                                                                              | on<br>fac<br>tor                        |         | 2<br>3                | 4<br>6                | 4<br>7                           |          |  |   |   |   |          |                  |
| Rh<br>eu<br>ma<br>toi<br>d<br>Ar<br>thr<br>itis | C<br>00<br>03<br>87<br>3 | TH<br>RIL                    | 1.<br>0<br>3<br>E<br>+<br>0<br>8 |            | TNF and<br>HNRNPL<br>related<br>immunoregula<br>tory long non-<br>coding RNA |                                         | 16      | 0<br>.<br>7<br>4<br>3 | 0<br>.<br>5           |                                  | 0.<br>01 |  | 1 | 1 | 0 | 20<br>19 | 2<br>0<br>1<br>9 |
| Rh<br>eu<br>ma<br>toi<br>d<br>Ar<br>thr<br>itis | C<br>00<br>03<br>87<br>3 | CD<br>KN<br>1B               | 1<br>0<br>2<br>7                 | P4652<br>7 | cyclin<br>dependent<br>kinase<br>inhibitor 1B                                |                                         | 45<br>4 | 0<br>.<br>4<br>0<br>9 | 0<br>.<br>7<br>6<br>9 | 0.<br>6<br>2<br>3<br>7<br>6      | 0.<br>01 |  | 1 | 1 | 0 | 20<br>15 | 2<br>0<br>1<br>5 |
| Rh<br>eu<br>ma<br>toi<br>d<br>Ar<br>thr<br>itis | C<br>00<br>03<br>87<br>3 | FS<br>TL<br>3                | 1<br>0<br>2<br>7<br>2            | O956<br>33 | follicle<br>stimulating<br>factor like 3                                     | En<br>zy<br>me<br>mo<br>du<br>lato<br>r | 33      | 0<br>.<br>6<br>9<br>5 | 0<br>.<br>4<br>2<br>3 | 0.<br>6<br>8<br>6<br>5<br>8      | 0.<br>01 |  | 0 | 1 | 0 | 20<br>05 | 2<br>0<br>0<br>5 |
| Rh<br>eu<br>ma<br>toi<br>d<br>Ar<br>thr<br>itis | C<br>00<br>03<br>87<br>3 | LO<br>C1<br>027<br>243<br>34 | 1.<br>0<br>3<br>E<br>+<br>0<br>8 | P5705<br>3 | histone H2B<br>type F-S-like                                                 |                                         | 22      | 0<br>.<br>7<br>1<br>1 | 0<br>.<br>6<br>1<br>5 |                                  | 0.<br>01 |  | 1 | 1 | 0 | 20<br>19 | 2<br>0<br>1<br>9 |
| Rh<br>eu<br>ma<br>toi<br>d<br>Ar<br>thr<br>itis | C<br>00<br>03<br>87<br>3 | LO<br>C1<br>027<br>250<br>35 | 1.<br>0<br>3<br>E<br>+<br>0<br>8 | O750<br>22 | leukocyte<br>immunoglobul<br>in-like<br>receptor<br>subfamily B<br>member 3  |                                         | 6       | 0<br>.<br>8<br>3<br>9 | 0<br>.<br>2<br>3<br>1 |                                  | 0.<br>01 |  | 1 | 1 | 0 | 20<br>16 | 2<br>0<br>1<br>6 |
| Rh<br>eu<br>ma<br>toi<br>d<br>Ar<br>thr<br>itis | C<br>00<br>03<br>87<br>3 | LIL<br>RB<br>2               | 1<br>0<br>2<br>8<br>8            |            | leukocyte<br>immunoglobul<br>in like<br>receptor B2                          |                                         | 56      | 0<br>.<br>6<br>2<br>3 | 0<br>.<br>6<br>1<br>5 | 1.<br>2<br>8<br>E<br>-<br>1<br>4 | 0.<br>01 |  | 1 | 1 | 0 | 20<br>02 | 2<br>0<br>0<br>2 |

|                      |        |         |       |        |                                                  |                 |     |        |        |         |      |   |   |   |      |      |
|----------------------|--------|---------|-------|--------|--------------------------------------------------|-----------------|-----|--------|--------|---------|------|---|---|---|------|------|
| Rheumatoid Arthritis | C00873 | DNAJ A2 | 10294 | O60884 | DnaJ heat shock protein family (Hsp40) member A2 |                 | 10  | 0.8399 | 0.9389 | 0.901   |      | 1 | 1 | 0 | 1999 | 1999 |
| Rheumatoid Arthritis | C00873 | ADAR    | 1033  | P55265 | adenosine deaminase RNA specific                 | Enzyme          | 256 | 0.501  | 0.8062 | 0.0282  | 0.01 | 1 | 1 | 0 | 2020 | 2020 |
| Rheumatoid Arthritis | C00873 | CDKN2C  | 1031  | P42773 | cyclin dependent kinase inhibitor 2C             |                 | 149 | 0.527  | 0.654  | 0.39526 | 0.01 | 1 | 1 | 0 | 2006 | 2006 |
| Rheumatoid Arthritis | C00873 | CRISP3  | 10321 | P54108 | cysteine rich secretory protein 3                | Immune response | 31  | 0.716  | 0.577  | 2.57-06 | 0.01 | 1 | 1 | 0 | 2019 | 2019 |
| Rheumatoid Arthritis | C00873 | CDKN3   | 10333 | Q16667 | cyclin dependent kinase inhibitor 3              |                 | 150 | 0.514  | 0.769  | 0.01946 | 0.01 | 1 | 1 | 0 | 2006 | 2006 |
| Rheumatoid Arthritis | C00873 | CDR1-AS | 10408 |        | CDR1 antisense RNA                               |                 | 51  | 0.623  | 0.654  |         | 0.01 | 1 | 1 | 0 | 2019 | 2019 |
| Rheumatoid Ar        | C00873 | CPQ     | 10404 | Q9Y646 | carboxypeptidase Q                               | Enzyme          | 87  | 0.579  | 0.769  | 1.32E-  | 0.01 | 1 | 1 | 0 | 2002 | 2002 |

|                                                 |                          |                     |                       |                       |                                                      |                                             |         |                       |                       |                                  |          |  |   |   |   |          |                  |
|-------------------------------------------------|--------------------------|---------------------|-----------------------|-----------------------|------------------------------------------------------|---------------------------------------------|---------|-----------------------|-----------------------|----------------------------------|----------|--|---|---|---|----------|------------------|
| thr<br>itis                                     |                          |                     |                       |                       |                                                      |                                             |         |                       | 1<br>4                |                                  |          |  |   |   |   |          |                  |
| Rh<br>eu<br>ma<br>toi<br>d<br>Ar<br>thr<br>itis | C<br>00<br>03<br>87<br>3 | SP<br>AG<br>11<br>B | 1<br>0<br>4<br>0<br>7 | Q086<br>48;Q6<br>PDA7 | sperm<br>associated<br>antigen 11B                   |                                             | 44      | 0<br>.<br>6<br>5      | 0<br>.<br>7<br>3<br>1 | 0.<br>0<br>2<br>7<br>5<br>1      | 0.<br>01 |  | 1 | 1 | 0 | 20<br>09 | 2<br>0<br>0<br>9 |
| Rh<br>eu<br>ma<br>toi<br>d<br>Ar<br>thr<br>itis | C<br>00<br>03<br>87<br>3 | YA<br>P1            | 1<br>0<br>4<br>1<br>3 | P4693<br>7            | Yes<br>associat<br>ed<br>protein 1                   | En<br>zy<br>me<br>mo<br>dul<br>ato<br>r     | 37<br>4 | 0<br>.<br>4<br>3<br>2 | 0<br>.<br>8<br>0<br>8 | 0.<br>9<br>9<br>9<br>1<br>8      | 0.<br>01 |  | 1 | 1 | 0 | 20<br>19 | 2<br>0<br>1<br>9 |
| Rh<br>eu<br>ma<br>toi<br>d<br>Ar<br>thr<br>itis | C<br>00<br>03<br>87<br>3 | PR<br>MT<br>5       | 1<br>0<br>4<br>1<br>9 | O147<br>44            | protein<br>arginine<br>methyltr<br>ansferas<br>e 5   | Ep<br>ige<br>net<br>ic<br>reg<br>ula<br>tor | 13<br>1 | 0<br>.<br>5<br>3<br>9 | 0<br>.<br>7<br>6<br>9 | 0.<br>9<br>9<br>9<br>9           | 0.<br>01 |  | 1 | 1 | 0 | 20<br>17 | 2<br>0<br>1<br>7 |
| Rh<br>eu<br>ma<br>toi<br>d<br>Ar<br>thr<br>itis | C<br>00<br>03<br>87<br>3 | CF<br>DP<br>1       | 1<br>0<br>4<br>2<br>8 | Q9UE<br>E9            | craniofacial<br>development<br>protein 1             |                                             | 71      | 0<br>.<br>6<br>1<br>9 | 0<br>.<br>6<br>1<br>5 | 0.<br>0<br>0<br>3<br>6<br>5<br>4 | 0.<br>01 |  | 1 | 1 | 0 | 20<br>14 | 2<br>0<br>1<br>4 |
| Rh<br>eu<br>ma<br>toi<br>d<br>Ar<br>thr<br>itis | C<br>00<br>03<br>87<br>3 | TM<br>EM<br>147     | 1<br>0<br>4<br>3<br>0 | Q9BV<br>K8            | transme<br>brane<br>protein<br>147                   | Re<br>ce<br>pto<br>r                        | 4       | 0<br>.<br>8<br>6<br>1 | 0<br>.<br>1<br>9<br>2 | 0.<br>0<br>0<br>0<br>1<br>4      | 0.<br>01 |  | 1 | 1 | 0 | 20<br>19 | 2<br>0<br>1<br>9 |
| Rh<br>eu<br>ma<br>toi<br>d<br>Ar<br>thr<br>itis | C<br>00<br>03<br>87<br>3 | ME<br>RT<br>K       | 1<br>0<br>4<br>6<br>1 | Q128<br>66            | MER<br>proto-<br>oncogen<br>e,<br>tyrosine<br>kinase | Ki<br>nas<br>e                              | 15<br>4 | 0<br>.<br>5<br>3<br>1 | 0<br>.<br>6<br>9<br>2 | 2.<br>6<br>6<br>E<br>-<br>1<br>1 | 0.<br>01 |  | 1 | 1 | 0 | 20<br>18 | 2<br>0<br>1<br>8 |
| Rh<br>eu<br>ma<br>toi                           | C<br>00<br>03            | CL<br>EC<br>10<br>A | 1<br>0<br>4           | Q8IU<br>N9            | C-type<br>lectin<br>domain                           | Re<br>ce<br>pto<br>r                        | 64      | 0<br>.<br>6           | 0<br>.<br>6           | 7.<br>7<br>6<br>E                | 0.<br>01 |  | 1 | 1 | 0 | 20<br>06 | 2<br>0<br>0<br>6 |



|                                                 |                          |                     |                       |            |                                                       |                                             |         |                       |                       |                                  |          |  |   |   |   |          |                  |
|-------------------------------------------------|--------------------------|---------------------|-----------------------|------------|-------------------------------------------------------|---------------------------------------------|---------|-----------------------|-----------------------|----------------------------------|----------|--|---|---|---|----------|------------------|
| d<br>Ar<br>thr<br>itis                          | 87<br>3                  |                     | 6<br>2                |            | containi<br>ng 10A                                    |                                             |         | 0<br>6                | 9<br>2                | -<br>0<br>6                      |          |  |   |   |   |          |                  |
| Rh<br>eu<br>ma<br>toi<br>d<br>Ar<br>thr<br>itis | C<br>00<br>03<br>87<br>3 | FS<br>T             | 1<br>0<br>4<br>6<br>8 | P1988<br>3 | follistati<br>n                                       | En<br>zy<br>me<br>mo<br>dul<br>ato<br>r     | 18<br>2 | 0<br>.<br>5<br>1<br>3 | 0<br>.<br>7<br>3<br>1 | 0.<br>9<br>8<br>0<br>1<br>4      | 0.<br>01 |  | 1 | 1 | 0 | 20<br>19 | 2<br>0<br>1<br>9 |
| Rh<br>eu<br>ma<br>toi<br>d<br>Ar<br>thr<br>itis | C<br>00<br>03<br>87<br>3 | CR<br>EB<br>3       | 1<br>0<br>4<br>8<br>8 | O438<br>89 | cAMP<br>responsive<br>element<br>binding<br>protein 3 |                                             | 39      | 0<br>.<br>6<br>6<br>3 | 0<br>.<br>6<br>5<br>4 | 1.<br>8<br>5<br>E<br>-<br>0<br>5 | 0.<br>01 |  | 1 | 1 | 0 | 20<br>06 | 2<br>0<br>0<br>6 |
| Rh<br>eu<br>ma<br>toi<br>d<br>Ar<br>thr<br>itis | C<br>00<br>03<br>87<br>3 | SE<br>MA<br>6B      | 1<br>0<br>5<br>0<br>1 | Q9H3<br>T3 | semapho<br>rin 6B                                     | Sig<br>nal<br>ing                           | 13      | 0<br>.<br>7<br>8      | 0<br>.<br>2<br>3<br>1 | 0.<br>0<br>6<br>2<br>2<br>7      | 0.<br>01 |  | 1 | 1 | 0 | 20<br>18 | 2<br>0<br>1<br>8 |
| Rh<br>eu<br>ma<br>toi<br>d<br>Ar<br>thr<br>itis | C<br>00<br>03<br>87<br>3 | CE<br>BP<br>B       | 1<br>0<br>5<br>1      | P1767<br>6 | CCAAT<br>enhance<br>r binding<br>protein<br>beta      | Tr<br>ans<br>cri<br>pti<br>on<br>fac<br>tor | 18<br>2 | 0<br>.<br>5<br>0<br>8 | 0<br>.<br>7<br>3<br>1 | 0.<br>3<br>5<br>8<br>0<br>9      | 0.<br>01 |  | 1 | 1 | 0 | 20<br>15 | 2<br>0<br>1<br>5 |
| Rh<br>eu<br>ma<br>toi<br>d<br>Ar<br>thr<br>itis | C<br>00<br>03<br>87<br>3 | SE<br>MA<br>3C      | 1<br>0<br>5<br>1<br>2 | Q999<br>85 | semapho<br>rin 3C                                     | Sig<br>nal<br>ing                           | 71      | 0<br>.<br>6<br>1<br>9 | 0<br>.<br>7<br>3<br>1 | 0.<br>0<br>0<br>8<br>7<br>4      | 0.<br>01 |  | 1 | 1 | 0 | 20<br>04 | 2<br>0<br>0<br>4 |
| Rh<br>eu<br>ma<br>toi<br>d<br>Ar<br>thr<br>itis | C<br>00<br>03<br>87<br>3 | MY<br>BB<br>P1<br>A | 1<br>0<br>5<br>1<br>4 | Q9BQ<br>G0 | MYB<br>binding<br>protein<br>la                       | En<br>zy<br>me                              | 31      | 0<br>.<br>6<br>9<br>5 | 0<br>.<br>6<br>1<br>5 | 5.<br>2<br>3<br>E<br>-<br>4<br>2 | 0.<br>01 |  | 1 | 1 | 0 | 20<br>03 | 2<br>0<br>0<br>3 |

|                      |          |          |          |        |                                                    |     |       |       |          |      |  |   |   |   |      |      |
|----------------------|----------|----------|----------|--------|----------------------------------------------------|-----|-------|-------|----------|------|--|---|---|---|------|------|
| Rheumatoid Arthritis | C0003873 | CI B1    | 10519    | Q99828 | calcium and integrin binding 1                     | 275 | 0.458 | 0.769 | 0.00326  | 0.01 |  | 1 | 1 | 0 | 2015 | 2015 |
| Rheumatoid Arthritis | C0003873 | ZN RD 2  | 10534    | O60232 | zinc ribbon domain containing 2                    | 311 | 0.443 | 0.769 | 1.84E-07 | 0.01 |  | 1 | 1 | 0 | 2005 | 2005 |
| Rheumatoid Arthritis | C0003873 | UP K3 B  | 1.05E+08 | Q9BT76 | uroplakin 3B                                       | 82  | 0.584 | 0.808 | 0.00234  | 0.01 |  | 1 | 1 | 0 | 2015 | 2015 |
| Rheumatoid Arthritis | C0003873 | CE RN A3 | 1.05E+08 |        | competing endogenous lncRNA 3 for miR-645          | 140 | 0.531 | 0.808 |          | 0.01 |  | 1 | 1 | 0 | 2011 | 2011 |
| Rheumatoid Arthritis | C0003873 | BA TF    | 10538    | Q16520 | basic leucine zipper ATF-like transcription factor | 31  | 0.674 | 0.75  | 0.85462  | 0.01 |  | 1 | 1 | 0 | 2014 | 2014 |
| Rheumatoid Arthritis | C0003873 | CE CR    | 1055     |        | cat eye syndrome chromosome region                 | 81  | 0.599 | 0.731 |          | 0.01 |  | 1 | 1 | 0 | 2019 | 2019 |
| Rheumatoid Ar        | C0003873 | AR PC 1A | 10552    | Q92747 | actin related protein 2/3 complex                  | 15  | 0.78  | 0.738 | 0.73997  | 0.01 |  | 1 | 1 | 1 | 2018 | 2018 |

|                                                 |                          |                              |                                  |            |                                                      |                                       |         |                       |                       |                                  |          |  |   |   |   |          |                  |
|-------------------------------------------------|--------------------------|------------------------------|----------------------------------|------------|------------------------------------------------------|---------------------------------------|---------|-----------------------|-----------------------|----------------------------------|----------|--|---|---|---|----------|------------------|
| thr<br>itis                                     |                          |                              |                                  |            | subunit<br>1A                                        |                                       |         |                       |                       |                                  |          |  |   |   |   |          |                  |
| Rh<br>eu<br>ma<br>toi<br>d<br>Ar<br>thr<br>itis | C<br>00<br>03<br>87<br>3 | IFI<br>44                    | 1<br>0<br>5<br>6<br>1            | Q8TC<br>B0 | interferon<br>induced<br>protein 44                  |                                       | 38      | 0<br>.<br>6<br>7<br>8 | 0<br>.<br>5<br>3<br>8 | 1.<br>9<br>4<br>E<br>-<br>1<br>5 | 0.<br>01 |  | 1 | 1 | 0 | 20<br>13 | 2<br>0<br>1<br>3 |
| Rh<br>eu<br>ma<br>toi<br>d<br>Ar<br>thr<br>itis | C<br>00<br>03<br>87<br>3 | NP<br>C2                     | 1<br>0<br>5<br>7<br>7            | P6191<br>6 | NPC<br>intracellular<br>cholesterol<br>transporter 2 |                                       | 81      | 0<br>.<br>6<br>1<br>2 | 0<br>.<br>7<br>6<br>9 | 0.<br>0<br>1<br>7<br>7<br>6      | 0.<br>01 |  | 1 | 1 | 0 | 20<br>11 | 2<br>0<br>1<br>1 |
| Rh<br>eu<br>ma<br>toi<br>d<br>Ar<br>thr<br>itis | C<br>00<br>03<br>87<br>3 | LO<br>C1<br>060<br>074<br>93 | 1.<br>0<br>6<br>E<br>+<br>0<br>8 |            | regulatory<br>region in<br>intron 4 of<br>PAX6       |                                       | 1       | 1                     | 0<br>.<br>1<br>1<br>5 |                                  | 0.<br>01 |  | 1 | 1 | 0 | 19<br>99 | 1<br>9<br>9<br>9 |
| Rh<br>eu<br>ma<br>toi<br>d<br>Ar<br>thr<br>itis | C<br>00<br>03<br>87<br>3 | TRI<br>M3                    | 1<br>0<br>6<br>1<br>2            | O753<br>82 | tripartite<br>motif<br>containi<br>ng 3              | En<br>zy<br>me                        | 31      | 0<br>.<br>6<br>8<br>2 | 0<br>.<br>4<br>2<br>3 | 0.<br>9<br>8<br>9<br>3           | 0.<br>01 |  | 1 | 1 | 0 | 20<br>19 | 2<br>0<br>1<br>9 |
| Rh<br>eu<br>ma<br>toi<br>d<br>Ar<br>thr<br>itis | C<br>00<br>03<br>87<br>3 | CE<br>NP<br>E                | 1<br>0<br>6<br>2                 | Q022<br>24 | centrom<br>ere<br>protein<br>E                       | Ce<br>llul<br>ar<br>str<br>uct<br>ure | 78      | 0<br>.<br>6<br>3<br>6 | 0<br>.<br>6<br>9<br>2 | 0.<br>2<br>4<br>1<br>4<br>6      | 0.<br>01 |  | 0 | 1 | 0 | 19<br>99 | 1<br>9<br>9<br>9 |
| Rh<br>eu<br>ma<br>toi<br>d<br>Ar<br>thr<br>itis | C<br>00<br>03<br>87<br>3 | PO<br>ST<br>N                | 1<br>0<br>6<br>3<br>1            | Q150<br>63 | periostin                                            | Sig<br>nal<br>ing                     | 37<br>8 | 0<br>.<br>4<br>2<br>8 | 0<br>.<br>8<br>8<br>5 | 1.<br>0<br>7<br>E<br>-<br>0<br>9 | 0.<br>01 |  | 1 | 1 | 0 | 20<br>19 | 2<br>0<br>1<br>9 |
| Rh<br>eu<br>ma<br>toi                           | C<br>00<br>03            | DC<br>TN<br>6                | 1<br>0<br>6                      | O003<br>99 | dynactin<br>subunit<br>6                             | Ce<br>llul<br>ar<br>str               | 31<br>5 | 0<br>.<br>4           | 0<br>.<br>7           | 0.<br>0<br>5<br>5                | 0.<br>01 |  | 1 | 1 | 0 | 20<br>05 | 2<br>0<br>0<br>5 |

|                                                 |                          |                              |                                  |            |                                                                             |                                                              |    |                       |                       |                                  |          |  |   |   |   |          |                  |
|-------------------------------------------------|--------------------------|------------------------------|----------------------------------|------------|-----------------------------------------------------------------------------|--------------------------------------------------------------|----|-----------------------|-----------------------|----------------------------------|----------|--|---|---|---|----------|------------------|
| d<br>Ar<br>thr<br>itis                          | 87<br>3                  |                              | 7<br>1                           |            |                                                                             | uct<br>ure                                                   |    | 4<br>2                | 6<br>9                | 7<br>4<br>1                      |          |  |   |   |   |          |                  |
| Rh<br>eu<br>ma<br>toi<br>d<br>Ar<br>thr<br>itis | C<br>00<br>03<br>87<br>3 | YM<br>E1<br>L1               | 1<br>0<br>7<br>3<br>0            | Q96T<br>A2 | YME1<br>like 1<br>ATPase                                                    | En<br>zy<br>me                                               | 60 | 0<br>.<br>6<br>3<br>3 | 0<br>.<br>6<br>5<br>4 | 0.<br>0<br>2<br>8<br>9<br>8<br>8 | 0.<br>01 |  | 1 | 1 | 0 | 20<br>14 | 2<br>0<br>1<br>4 |
| Rh<br>eu<br>ma<br>toi<br>d<br>Ar<br>thr<br>itis | C<br>00<br>03<br>87<br>3 | MA<br>P3<br>K2               | 1<br>0<br>7<br>4<br>6            | Q9Y2<br>U5 | mitogen<br>-<br>activate<br>d protein<br>kinase<br>kinase<br>kinase 2       | Ki<br>nas<br>e                                               | 37 | 0<br>.<br>6<br>8<br>6 | 0<br>.<br>2<br>3<br>1 | 0.<br>9<br>9<br>9<br>9           | 0.<br>01 |  | 1 | 1 | 0 | 20<br>04 | 2<br>0<br>0<br>4 |
| Rh<br>eu<br>ma<br>toi<br>d<br>Ar<br>thr<br>itis | C<br>00<br>03<br>87<br>3 | MA<br>SP2                    | 1<br>0<br>7<br>4<br>7            | O001<br>87 | mannan<br>binding<br>lectin<br>serine<br>peptidas<br>e 2                    | En<br>zy<br>me                                               | 86 | 0<br>.<br>5<br>8<br>2 | 0<br>.<br>6<br>9<br>2 | 3.<br>0<br>4<br>E<br>-<br>1<br>4 | 0.<br>01 |  | 1 | 1 | 0 | 20<br>14 | 2<br>0<br>1<br>4 |
| Rh<br>eu<br>ma<br>toi<br>d<br>Ar<br>thr<br>itis | C<br>00<br>03<br>87<br>3 | LO<br>C1<br>079<br>874<br>62 | 1.<br>0<br>8<br>E<br>+<br>0<br>8 | O750<br>22 | leukocyte<br>immunoglobul<br>in-like<br>receptor<br>subfamily B<br>member 3 |                                                              | 6  | 0<br>.<br>8<br>3<br>9 | 0<br>.<br>2<br>3<br>1 |                                  | 0.<br>01 |  | 1 | 1 | 0 | 20<br>16 | 2<br>0<br>1<br>6 |
| Rh<br>eu<br>ma<br>toi<br>d<br>Ar<br>thr<br>itis | C<br>00<br>03<br>87<br>3 | CY<br>SL<br>TR<br>1          | 1<br>0<br>8<br>0<br>0            | Q9Y2<br>71 | cysteiny<br>l<br>leukotrie<br>ne<br>receptor<br>1                           | G-<br>pro<br>tei<br>n<br>co<br>upl<br>ed<br>rec<br>ept<br>or | 81 | 0<br>.<br>5<br>9<br>3 | 0<br>.<br>7<br>6<br>9 | 0.<br>0<br>1<br>2<br>0<br>3      | 0.<br>01 |  | 1 | 1 | 0 | 20<br>17 | 2<br>0<br>1<br>7 |
| Rh<br>eu<br>ma<br>toi<br>d<br>Ar<br>thr<br>itis | C<br>00<br>03<br>87<br>3 | NE<br>U3                     | 1<br>0<br>8<br>2<br>5            | Q9U<br>Q49 | neurami<br>nidase 3                                                         | En<br>zy<br>me                                               | 39 | 0<br>.<br>6<br>6<br>6 | 0<br>.<br>6<br>5<br>4 | 2.<br>4<br>4<br>E<br>-<br>0<br>8 | 0.<br>01 |  | 1 | 1 | 0 | 20<br>19 | 2<br>0<br>1<br>9 |

|                      |          |         |       |        |                                                    |     |       |       |          |      |  |   |   |   |      |      |
|----------------------|----------|---------|-------|--------|----------------------------------------------------|-----|-------|-------|----------|------|--|---|---|---|------|------|
| Rheumatoid Arthritis | C0003873 | CEACAM8 | 1088  | P31997 | CEA cell adhesion molecule 8                       | 29  | 0.682 | 0.538 | 3.3E-07  | 0.01 |  | 1 | 1 | 0 | 2019 | 2019 |
| Rheumatoid Arthritis | C0003873 | LYVE1   | 10894 | Q9Y5Y7 | lymphatic vessel endothelial hyaluronan receptor 1 | 80  | 0.587 | 0.731 | 4.72E-07 | 0.01 |  | 1 | 1 | 0 | 2017 | 2017 |
| Rheumatoid Arthritis | C0003873 | JTB     | 10899 | O76095 | jumping translocation breakpoint                   | 64  | 0.615 | 0.769 | 0.42432  | 0.01 |  | 1 | 1 | 0 | 2018 | 2018 |
| Rheumatoid Arthritis | C0003873 | SUB1    | 10923 | P53999 | SUB1 regulator of transcription                    | 260 | 0.465 | 0.846 | 0.89245  | 0.01 |  | 1 | 1 | 0 | 1990 | 1990 |
| Rheumatoid Arthritis | C0003873 | TMED2   | 10959 | Q15363 | transmembrane p24 trafficking protein 2            | 73  | 0.61  | 0.692 | 0.89231  | 0.01 |  | 1 | 1 | 0 | 1989 | 1989 |
| Rheumatoid Arthritis | C0003873 | IFI44L  | 10964 | Q53G44 | interferon induced protein 44 like                 | 23  | 0.79  | 0.462 | 1.35E-12 | 0.01 |  | 1 | 1 | 0 | 2016 | 2016 |
| Rheumatoid Ar        | C0003873 | RAB40B  | 10966 | Q12829 | RAB40B, member RAS oncogene family                 | 99  | 0.563 | 0.731 | 8.66E-1  | 0.01 |  | 1 | 1 | 0 | 2017 | 2017 |

|                                                 |                          |                 |                             |            |                                                                    |                      |         |                       |                       |                                  |          |  |   |   |   |          |                  |
|-------------------------------------------------|--------------------------|-----------------|-----------------------------|------------|--------------------------------------------------------------------|----------------------|---------|-----------------------|-----------------------|----------------------------------|----------|--|---|---|---|----------|------------------|
| thr<br>itis                                     |                          |                 |                             |            |                                                                    |                      |         |                       |                       | 0<br>6                           |          |  |   |   |   |          |                  |
| Rh<br>eu<br>ma<br>toi<br>d<br>Ar<br>thr<br>itis | C<br>00<br>03<br>87<br>3 | ER<br>VK<br>-32 | 1.<br>1<br>E<br>+<br>0<br>8 |            | endogenous<br>retrovirus<br>group K<br>member 32,<br>envelope      |                      | 15<br>8 | 0<br>.<br>5<br>2<br>2 | 0<br>.<br>6<br>9<br>2 |                                  | 0.<br>01 |  | 1 | 1 | 0 | 20<br>17 | 2<br>0<br>1<br>7 |
| Rh<br>eu<br>ma<br>toi<br>d<br>Ar<br>thr<br>itis | C<br>00<br>03<br>87<br>3 | IL2<br>4        | 1<br>1<br>0<br>0<br>9       | Q130<br>07 | interleukin 24                                                     |                      | 20<br>2 | 0<br>.<br>4<br>9<br>8 | 0<br>.<br>7<br>6<br>9 | 5.<br>8<br>8<br>E<br>-<br>0<br>7 | 0.<br>01 |  | 1 | 1 | 0 | 20<br>08 | 2<br>0<br>0<br>8 |
| Rh<br>eu<br>ma<br>toi<br>d<br>Ar<br>thr<br>itis | C<br>00<br>03<br>87<br>3 | LIL<br>RA<br>1  | 1<br>1<br>0<br>2<br>4       | O750<br>19 | leukocyt<br>e<br>immuno<br>globulin<br>like<br>receptor<br>A1      | Re<br>ce<br>pto<br>r | 8       | 0<br>.<br>8<br>0<br>5 | 0<br>.<br>3<br>0<br>8 | 7.<br>3<br>9<br>E<br>-<br>2<br>0 | 0.<br>01 |  | 1 | 1 | 0 | 20<br>08 | 2<br>0<br>0<br>8 |
| Rh<br>eu<br>ma<br>toi<br>d<br>Ar<br>thr<br>itis | C<br>00<br>03<br>87<br>3 | LIL<br>RB<br>3  | 1<br>1<br>0<br>2<br>5       | O750<br>22 | leukocyte<br>immunoglobul<br>in like<br>receptor B3                |                      | 10      | 0<br>.<br>8<br>0<br>5 | 0<br>.<br>2<br>6<br>9 | 3.<br>1<br>1<br>E<br>-<br>0<br>6 | 0.<br>01 |  | 1 | 1 | 0 | 20<br>16 | 2<br>0<br>1<br>6 |
| Rh<br>eu<br>ma<br>toi<br>d<br>Ar<br>thr<br>itis | C<br>00<br>03<br>87<br>3 | LIL<br>RA<br>2  | 1<br>1<br>0<br>2<br>7       | Q8N1<br>49 | leukocyt<br>e<br>immuno<br>globulin<br>like<br>receptor<br>A2      | Re<br>ce<br>pto<br>r | 6       | 0<br>.<br>8<br>6<br>1 | 0<br>.<br>2<br>3<br>1 | 6.<br>9<br>1<br>E<br>-<br>2<br>0 | 0.<br>01 |  | 1 | 1 | 0 | 20<br>02 | 2<br>0<br>0<br>2 |
| Rh<br>eu<br>ma<br>toi<br>d<br>Ar<br>thr<br>itis | C<br>00<br>03<br>87<br>3 | PI<br>M2        | 1<br>1<br>0<br>4<br>0       | Q9P1<br>W9 | Pim-2<br>proto-<br>oncogen<br>e,<br>serine/th<br>reonine<br>kinase | Ki<br>nas<br>e       | 68      | 0<br>.<br>6<br>0<br>6 | 0<br>.<br>5<br>3<br>8 | 0.<br>9<br>4<br>8<br>0<br>1      | 0.<br>01 |  | 1 | 1 | 0 | 20<br>15 | 2<br>0<br>1<br>5 |
| Rh<br>eu<br>ma<br>toi                           | C<br>00<br>03            | C5-<br>OT<br>1  | 1.<br>1<br>1<br>E           |            | C5 3' UTR<br>overlapping<br>transcript 1                           |                      | 1       | 1                     | 0<br>.<br>1           |                                  | 0.<br>01 |  | 1 | 1 | 3 | 20<br>16 | 2<br>0<br>1<br>6 |

|                                                 |                          |                      |                       |            |                                                                  |                                       |         |                       |                            |                                  |          |  |   |   |   |          |                  |
|-------------------------------------------------|--------------------------|----------------------|-----------------------|------------|------------------------------------------------------------------|---------------------------------------|---------|-----------------------|----------------------------|----------------------------------|----------|--|---|---|---|----------|------------------|
| d<br>Ar<br>thr<br>itis                          | 87<br>3                  |                      | +<br>0<br>8           |            |                                                                  |                                       |         | 1<br>5                |                            |                                  |          |  |   |   |   |          |                  |
| Rh<br>eu<br>ma<br>toi<br>d<br>Ar<br>thr<br>itis | C<br>00<br>03<br>87<br>3 | TP<br>PP             | 1<br>1<br>0<br>7<br>6 | O948<br>11 | tubulin<br>polymer<br>ization<br>promoti<br>ng<br>protein        | Ce<br>llul<br>ar<br>str<br>uct<br>ure | 11<br>0 | 0<br>.<br>5<br>7      | 0<br>.<br>6<br>9<br>2      | 0.<br>2<br>0<br>3<br>4           | 0.<br>01 |  | 1 | 1 | 0 | 19<br>89 | 1<br>9<br>8<br>9 |
| Rh<br>eu<br>ma<br>toi<br>d<br>Ar<br>thr<br>itis | C<br>00<br>03<br>87<br>3 | DN<br>AJ<br>B4       | 1<br>1<br>0<br>8<br>0 | Q9U<br>DY4 | DnaJ heat<br>shock protein<br>family<br>(Hsp40)<br>member B4     |                                       | 37      | 0<br>.<br>7<br>0<br>5 | 0<br>.<br>3<br>4<br>6<br>6 | 0.<br>0<br>1<br>6<br>2<br>2<br>7 | 0.<br>01 |  | 1 | 1 | 0 | 20<br>14 | 2<br>0<br>1<br>4 |
| Rh<br>eu<br>ma<br>toi<br>d<br>Ar<br>thr<br>itis | C<br>00<br>03<br>87<br>3 | RC<br>AN<br>3        | 1<br>1<br>1<br>2<br>3 | Q9U<br>KA8 | RCAN<br>family<br>member<br>3                                    | Sig<br>nal<br>ing                     | 9       | 0<br>.<br>8<br>2<br>1 | 0<br>.<br>1<br>5<br>4      | 0.<br>0<br>0<br>1<br>5<br>7      | 0.<br>01 |  | 1 | 1 | 0 | 20<br>17 | 2<br>0<br>1<br>7 |
| Rh<br>eu<br>ma<br>toi<br>d<br>Ar<br>thr<br>itis | C<br>00<br>03<br>87<br>3 | CH<br>GA             | 1<br>1<br>1<br>3      | P1064<br>5 | chromogranin<br>A                                                |                                       | 21<br>8 | 0<br>.<br>4<br>9      | 0<br>.<br>8<br>0<br>8      | 0.<br>0<br>3<br>0<br>3<br>6<br>9 | 0.<br>01 |  | 1 | 1 | 0 | 20<br>08 | 2<br>0<br>0<br>8 |
| Rh<br>eu<br>ma<br>toi<br>d<br>Ar<br>thr<br>itis | C<br>00<br>03<br>87<br>3 | IL1<br>RA<br>PL<br>1 | 1<br>1<br>1<br>4<br>1 | Q9NZ<br>N1 | interleuk<br>in 1<br>receptor<br>accessor<br>y protein<br>like 1 | Re<br>ce<br>pto<br>r                  | 10<br>3 | 0<br>.<br>6<br>1<br>7 | 0<br>.<br>6<br>9<br>2      | 0.<br>9<br>9<br>8<br>8<br>6      | 0.<br>01 |  | 1 | 1 | 0 | 20<br>20 | 2<br>0<br>2<br>0 |
| Rh<br>eu<br>ma<br>toi<br>d<br>Ar<br>thr<br>itis | C<br>00<br>03<br>87<br>3 | KA<br>T7             | 1<br>1<br>1<br>4<br>3 | O952<br>51 | lysine<br>acetyltra<br>nsferase<br>7                             | En<br>zy<br>me                        | 35      | 0<br>.<br>6<br>8<br>2 | 0<br>.<br>5<br>3<br>8      | 0.<br>9<br>9<br>9<br>9           | 0.<br>01 |  | 1 | 1 | 0 | 20<br>17 | 2<br>0<br>1<br>7 |

|                      |          |         |       |        |                                                          |                         |     |       |        |          |      |  |   |   |   |      |      |
|----------------------|----------|---------|-------|--------|----------------------------------------------------------|-------------------------|-----|-------|--------|----------|------|--|---|---|---|------|------|
| Rheumatoid Arthritis | C0003873 | ADAMTS7 | 11173 | Q9UKP4 | ADAM metallopeptidase with thrombospondin type 1 motif 7 | Enzyme                  | 40  | 0.666 | 0.577  | 2.25E-14 | 0.01 |  | 1 | 1 | 0 | 2006 | 2006 |
| Rheumatoid Arthritis | C0003873 | TR EH   | 11181 | O43280 | trehalase                                                |                         | 42  | 0.677 | 0.654  | 8.96E-15 | 0.01 |  | 0 | 1 | 0 | 2017 | 2017 |
| Rheumatoid Arthritis | C0003873 | WIF1    | 11197 | Q9Y5W5 | WNT inhibitor 1                                          | Calcium-binding protein | 171 | 0.577 | 0.731  | 1.32E-09 | 0.01 |  | 1 | 1 | 0 | 2013 | 2013 |
| Rheumatoid Arthritis | C0003873 | CH EK2  | 11200 | O96017 | checkpoint kinase 2                                      | Kinase                  | 297 | 0.468 | 0.808  | 1.21E-24 | 0.01 |  | 1 | 1 | 0 | 2005 | 2005 |
| Rheumatoid Arthritis | C0003873 | CH N2   | 1124  | P52757 | chimerin 2                                               |                         | 25  | 0.711 | 0.615  | 0.002301 | 0.01 |  | 1 | 1 | 0 | 2018 | 2018 |
| Rheumatoid Arthritis | C0003873 | CH P1   | 11261 | Q99653 | calcineurin like EF-hand protein 1                       |                         | 141 | 0.546 | 0.7667 | 0.667    | 0.01 |  | 1 | 1 | 0 | 1989 | 1989 |
| Rheumatoid           | C0003    | TR EX1  | 112   | Q9NSU2 | three prime repair exonuclease 1                         |                         | 241 | 0.55  | 0.58   | 0.575    | 0.01 |  | 1 | 1 | 0 | 2010 | 2010 |



|                                                 |                          |                     |                            |            |                                                        |                                                              |                       |                       |                            |                                  |          |   |   |   |          |                    |
|-------------------------------------------------|--------------------------|---------------------|----------------------------|------------|--------------------------------------------------------|--------------------------------------------------------------|-----------------------|-----------------------|----------------------------|----------------------------------|----------|---|---|---|----------|--------------------|
| d<br>Ar<br>thr<br>itis                          | 87<br>3                  |                     | 7<br>7                     |            |                                                        |                                                              | 1<br>7                | 0<br>8                | 2<br>8                     |                                  |          |   |   |   |          |                    |
| Rh<br>eu<br>ma<br>toi<br>d<br>Ar<br>thr<br>itis | C<br>00<br>03<br>87<br>3 | B4<br>GA<br>LT<br>7 | 1<br>1<br>2<br>8<br>5      | Q9UB<br>V7 | beta-1,4-<br>galactosyltran<br>sferase 7               | 79                                                           | 0<br>.<br>6<br>2<br>8 | 0<br>.<br>6<br>5<br>4 | 0.<br>0<br>0<br>1<br>3     | 0.<br>01                         |          | 1 | 1 | 0 | 20<br>10 | 2<br>0<br>1<br>0   |
| Rh<br>eu<br>ma<br>toi<br>d<br>Ar<br>thr<br>itis | C<br>00<br>03<br>87<br>3 | CH<br>RM<br>3       | 1<br>1<br>3<br>1           | P2030<br>9 | choliner<br>gic<br>receptor<br>muscar<br>inic 3        | G-<br>pro<br>tei<br>n<br>co<br>upl<br>ed<br>rec<br>ept<br>or | 28<br>4               | 0<br>.<br>4<br>6<br>4 | 0<br>.<br>8<br>8<br>5      | 0.<br>9<br>9<br>2<br>5<br>3      | 0.<br>01 |   | 1 | 1 | 0        | 20<br>20<br>2<br>0 |
| Rh<br>eu<br>ma<br>toi<br>d<br>Ar<br>thr<br>itis | C<br>00<br>03<br>87<br>3 | CD<br>CA<br>5       | 1<br>1<br>3<br>1<br>3<br>0 | Q96F<br>F9 | cell division<br>cycle<br>associated 5                 |                                                              | 10<br>5               | 0<br>.<br>5<br>6<br>3 | 0<br>.<br>8<br>0<br>1<br>8 | 0.<br>0<br>1<br>5<br>8           | 0.<br>01 |   | 1 | 1 | 0        | 20<br>15<br>1<br>5 |
| Rh<br>eu<br>ma<br>toi<br>d<br>Ar<br>thr<br>itis | C<br>00<br>03<br>87<br>3 | SL<br>C4<br>6A<br>1 | 1<br>1<br>3<br>2<br>3<br>5 | Q96N<br>T5 | solute<br>carrier<br>family<br>46<br>member<br>1       | Tr<br>ans<br>por<br>ter                                      | 97                    | 0<br>.<br>6<br>0<br>6 | 0<br>.<br>7<br>3<br>1      | 0.<br>0<br>2<br>1<br>8<br>5<br>8 | 0.<br>01 |   | 1 | 1 | 0        | 20<br>18<br>1<br>8 |
| Rh<br>eu<br>ma<br>toi<br>d<br>Ar<br>thr<br>itis | C<br>00<br>03<br>87<br>3 | VSI<br>G4           | 1<br>1<br>3<br>2<br>6      | Q9Y2<br>79 | V-set and<br>immunoglobul<br>in domain<br>containing 4 |                                                              | 51                    | 0<br>.<br>6<br>2<br>8 | 0<br>.<br>6<br>1<br>5      | 1.<br>5<br>E<br>-<br>0<br>9      | 0.<br>01 |   | 1 | 1 | 0        | 20<br>02<br>0<br>2 |
| Rh<br>eu<br>ma<br>toi<br>d<br>Ar<br>thr<br>itis | C<br>00<br>03<br>87<br>3 | GL<br>CC<br>II      | 1<br>1<br>3<br>2<br>6<br>3 | Q86V<br>Q1 | glucocorticoid<br>induced 1                            |                                                              | 27                    | 0<br>.<br>7<br>1<br>6 | 0<br>.<br>3<br>8<br>5      | 0.<br>0<br>5<br>9<br>0<br>3      | 0.<br>01 |   | 1 | 1 | 1        | 20<br>15<br>1<br>5 |

|                      |          |        |          |               |                                                |                      |     |       |       |        |      |  |   |   |   |      |      |
|----------------------|----------|--------|----------|---------------|------------------------------------------------|----------------------|-----|-------|-------|--------|------|--|---|---|---|------|------|
| Rheumatoid Arthritis | C0003873 | CHRNA7 | 1139     | P36544;Q494W8 | cholinergic receptor nicotinic alpha 7 subunit | Ion channel          | 172 | 0.532 | 0.654 | 0.0415 | 0.01 |  | 1 | 1 | 0 | 2019 | 2019 |
| Rheumatoid Arthritis | C0003873 | DBA2   | 114086   |               | Diamond-Blackfan anemia 2                      |                      | 74  | 0.599 | 0.731 |        | 0.01 |  | 1 | 1 | 0 | 1999 | 1999 |
| Rheumatoid Arthritis | C0003873 | UCN3   | 114131   | Q969E3        | urocortin 3                                    |                      | 82  | 0.593 | 0.731 | 0.0878 | 0.01 |  | 1 | 1 | 0 | 2011 | 2011 |
| Rheumatoid Arthritis | C0003873 | CIRBP  | 1153     | Q14011        | cold inducible RNA binding protein             | Nucleic acid binding | 72  | 0.592 | 0.731 | 0.0366 | 0.01 |  | 1 | 1 | 0 | 2018 | 2018 |
| Rheumatoid Arthritis | C0003873 | H3P8   | 1.15E+08 |               | H3 histone pseudogene 8                        |                      | 116 | 0.544 | 0.808 |        | 0.01 |  | 1 | 1 | 0 | 1990 | 1990 |
| Rheumatoid Arthritis | C0003873 | H3P23  | 1.15E+08 |               | H3 histone pseudogene 23                       |                      | 310 | 0.433 | 0.769 |        | 0.01 |  | 1 | 1 | 0 | 2005 | 2005 |
| Rheumatoid Ar        | C0003873 | H3P19  | 1.15E+   |               | H3 histone pseudogene 19                       |                      | 62  | 0.631 | 0.577 |        | 0.01 |  | 1 | 1 | 0 | 1989 | 1989 |

|                                                 |                          |                           |                                  |            |                                                        |                                                              |                       |                       |                       |                                  |          |   |   |   |          |                         |
|-------------------------------------------------|--------------------------|---------------------------|----------------------------------|------------|--------------------------------------------------------|--------------------------------------------------------------|-----------------------|-----------------------|-----------------------|----------------------------------|----------|---|---|---|----------|-------------------------|
| thr<br>itis                                     |                          |                           | 0<br>8                           |            |                                                        |                                                              |                       |                       |                       |                                  |          |   |   |   |          |                         |
| Rh<br>eu<br>ma<br>toi<br>d<br>Ar<br>thr<br>itis | C<br>00<br>03<br>87<br>3 | H3<br>P40                 | 1.<br>1<br>5<br>E<br>+<br>0<br>8 |            | H3 histone<br>pseudogene 40                            | 17<br>5                                                      | 0<br>.<br>5<br>0<br>6 | 0<br>.<br>8<br>4<br>6 |                       | 0.<br>01                         |          | 1 | 1 | 0 | 20<br>02 | 2<br>0<br>0<br>2        |
| Rh<br>eu<br>ma<br>toi<br>d<br>Ar<br>thr<br>itis | C<br>00<br>03<br>87<br>3 | AD<br>CY<br>AP<br>1R<br>1 | 1<br>1<br>7                      | P4158<br>6 | ADCYA<br>P<br>receptor<br>type I                       | G-<br>pro<br>tei<br>n<br>co<br>upl<br>ed<br>rec<br>ept<br>or | 11<br>8               | 0<br>.<br>5<br>6<br>1 | 0<br>.<br>7<br>6<br>9 | 7.<br>2<br>3<br>E<br>-<br>1<br>0 | 0.<br>01 |   | 1 | 1 | 0        | 20<br>18<br>0<br>1<br>8 |
| Rh<br>eu<br>ma<br>toi<br>d<br>Ar<br>thr<br>itis | C<br>00<br>03<br>87<br>3 | PR<br>AP<br>1             | 1<br>1<br>8<br>4<br>7<br>1       | Q96N<br>Z9 | proline rich<br>acidic protein<br>1                    |                                                              | 59                    | 0<br>.<br>6<br>2<br>1 | 0<br>.<br>6<br>1<br>5 | 0.<br>0<br>3<br>2<br>4<br>6<br>3 | 0.<br>01 |   | 1 | 1 | 0        | 20<br>05<br>0<br>0<br>5 |
| Rh<br>eu<br>ma<br>toi<br>d<br>Ar<br>thr<br>itis | C<br>00<br>03<br>87<br>3 | TP<br>P1                  | 1<br>2<br>0<br>0                 | O147<br>73 | tripeptid<br>yl<br>peptidas<br>e 1                     | En<br>zy<br>me                                               | 15<br>1               | 0<br>.<br>5<br>5<br>1 | 0<br>.<br>8<br>0<br>8 | 6.<br>2<br>6<br>E<br>-<br>0<br>7 | 0.<br>01 |   | 1 | 1 | 0        | 20<br>12<br>0<br>1<br>2 |
| Rh<br>eu<br>ma<br>toi<br>d<br>Ar<br>thr<br>itis | C<br>00<br>03<br>87<br>3 | CY<br>P2<br>R1            | 1<br>2<br>0<br>2<br>2<br>7       | Q6V<br>VX0 | cytochrome<br>P450 family 2<br>subfamily R<br>member 1 |                                                              | 13<br>9               | 0<br>.<br>5<br>6<br>3 | 0<br>.<br>7<br>3<br>1 | 3.<br>7<br>9<br>E<br>-<br>1<br>0 | 0.<br>01 |   | 1 | 1 | 0        | 20<br>14<br>0<br>1<br>4 |
| Rh<br>eu<br>ma<br>toi<br>d<br>Ar<br>thr<br>itis | C<br>00<br>03<br>87<br>3 | CL<br>TA                  | 1<br>2<br>1<br>1                 | P0949<br>6 | clathrin<br>light<br>chain A                           | Tr<br>ans<br>por<br>ter                                      | 55                    | 0<br>.<br>6<br>2<br>8 | 0<br>.<br>6<br>5<br>4 | 0.<br>9<br>6<br>3<br>1<br>9      | 0.<br>01 |   | 1 | 1 | 0        | 20<br>05<br>0<br>0<br>5 |
| Rh<br>eu                                        | C<br>00                  | TP<br>H2                  | 1<br>2                           | Q8IW<br>U9 | tryptophan<br>hydroxylase 2                            |                                                              | 13<br>7               | 0<br>.                | 0<br>.                | 2.<br>5                          | 0.<br>01 |   | 1 | 1 | 0        | 20<br>12<br>0           |

|                                                 |                          |                |                            |            |                                                     |                                                              |         |                       |                       |                                  |          |  |   |   |   |          |                  |
|-------------------------------------------------|--------------------------|----------------|----------------------------|------------|-----------------------------------------------------|--------------------------------------------------------------|---------|-----------------------|-----------------------|----------------------------------|----------|--|---|---|---|----------|------------------|
| ma<br>toi<br>d<br>Ar<br>thr<br>itis             | 03<br>87<br>3            |                | 1<br>2<br>7<br>8           |            |                                                     |                                                              |         | 5<br>4<br>6           | 6<br>5<br>4           | 4<br>E<br>-<br>0<br>7            |          |  |   |   |   | 1<br>2   |                  |
| Rh<br>eu<br>ma<br>toi<br>d<br>Ar<br>thr<br>itis | C<br>00<br>03<br>87<br>3 | CM<br>KL<br>R1 | 1<br>2<br>4<br>0           | Q997<br>88 | chemeri<br>n<br>chemoki<br>ne-like<br>receptor<br>1 | G-<br>pro<br>tei<br>n<br>co<br>upl<br>ed<br>rec<br>ept<br>or | 75      | 0<br>.<br>6<br>1<br>2 | 0<br>.<br>6<br>9<br>2 | 0.<br>0<br>1<br>0<br>7<br>6<br>7 | 0.<br>01 |  | 1 | 1 | 0 | 20<br>12 | 2<br>0<br>1<br>2 |
| Rh<br>eu<br>ma<br>toi<br>d<br>Ar<br>thr<br>itis | C<br>00<br>03<br>87<br>3 | GG<br>T6       | 1<br>2<br>4<br>9<br>7<br>5 | Q6P5<br>31 | gamma-<br>glutamyltransf<br>erase 6                 |                                                              | 2       | 0<br>.<br>9<br>3<br>1 | 0<br>.<br>1<br>1<br>5 | 2.<br>9<br>8<br>E<br>-<br>0<br>8 | 0.<br>01 |  | 1 | 1 | 0 | 20<br>17 | 2<br>0<br>1<br>7 |
| Rh<br>eu<br>ma<br>toi<br>d<br>Ar<br>thr<br>itis | C<br>00<br>03<br>87<br>3 | PL<br>K3       | 1<br>2<br>6<br>3           | Q9H4<br>B4 | polo like<br>kinase 3                               | Ki<br>nas<br>e                                               | 52      | 0<br>.<br>6<br>4<br>4 | 0<br>.<br>5<br>3<br>8 | 1.<br>8<br>5<br>E<br>-<br>0<br>6 | 0.<br>01 |  | 1 | 1 | 0 | 20<br>17 | 2<br>0<br>1<br>7 |
| Rh<br>eu<br>ma<br>toi<br>d<br>Ar<br>thr<br>itis | C<br>00<br>03<br>87<br>3 | CN<br>N2       | 1<br>2<br>6<br>5           | Q994<br>39 | calponin<br>2                                       | Ce<br>llul<br>ar<br>str<br>uct<br>ure                        | 36      | 0<br>.<br>6<br>6<br>6 | 0<br>.<br>5<br>3<br>8 | 0.<br>0<br>2<br>4<br>3<br>9<br>9 | 0.<br>01 |  | 1 | 1 | 0 | 20<br>16 | 2<br>0<br>1<br>6 |
| Rh<br>eu<br>ma<br>toi<br>d<br>Ar<br>thr<br>itis | C<br>00<br>03<br>87<br>3 | CO<br>L1<br>A1 | 1<br>2<br>7<br>7           | P0245<br>2 | collagen type I<br>alpha 1 chain                    |                                                              | 48<br>7 | 0<br>.<br>4<br>3      | 0<br>.<br>8<br>0<br>8 | 1<br>0<br>01                     | 0.<br>01 |  | 1 | 1 | 0 | 20<br>15 | 2<br>0<br>1<br>5 |
| Rh<br>eu<br>ma<br>toi<br>d<br>Ar                | C<br>00<br>03<br>87<br>3 | OS<br>CP<br>1  | 1<br>2<br>7<br>7<br>0<br>0 | Q8W<br>VF1 | organic solute<br>carrier partner<br>1              |                                                              | 61      | 0<br>.<br>6<br>1      | 0<br>.<br>6<br>9<br>2 | 7.<br>0<br>3<br>E<br>-           | 0.<br>01 |  | 1 | 1 | 0 | 20<br>02 | 2<br>0<br>0<br>2 |

|                                                 |                          |                 |                            |            |                                                              |                                                |         |                       |                       |                                  |          |  |   |   |   |                         |
|-------------------------------------------------|--------------------------|-----------------|----------------------------|------------|--------------------------------------------------------------|------------------------------------------------|---------|-----------------------|-----------------------|----------------------------------|----------|--|---|---|---|-------------------------|
| thr<br>itis                                     |                          |                 |                            |            |                                                              |                                                |         |                       | 1<br>0                |                                  |          |  |   |   |   |                         |
| Rh<br>eu<br>ma<br>toi<br>d<br>Ar<br>thr<br>itis | C<br>00<br>03<br>87<br>3 | CO<br>L1<br>A2  | 1<br>2<br>7<br>8           | P0812<br>3 | collagen type I<br>alpha 2 chain                             |                                                | 27<br>1 | 0<br>.<br>4<br>8<br>6 | 0<br>.<br>8<br>4<br>6 | 1                                | 0.<br>01 |  | 1 | 1 | 0 | 20<br>17<br>0<br>1<br>7 |
| Rh<br>eu<br>ma<br>toi<br>d<br>Ar<br>thr<br>itis | C<br>00<br>03<br>87<br>3 | CO<br>L4<br>A5  | 1<br>2<br>8<br>7           | P2940<br>0 | collagen type<br>IV alpha 5<br>chain                         |                                                | 12<br>4 | 0<br>.<br>5<br>5<br>3 | 0<br>.<br>6<br>5<br>4 | 1                                | 0.<br>01 |  | 1 | 1 | 0 | 20<br>19<br>0<br>1<br>9 |
| Rh<br>eu<br>ma<br>toi<br>d<br>Ar<br>thr<br>itis | C<br>00<br>03<br>87<br>3 | CO<br>L9<br>A2  | 1<br>2<br>9<br>8           | Q140<br>55 | collagen type<br>IX alpha 2<br>chain                         |                                                | 11<br>6 | 0<br>.<br>5<br>7<br>2 | 0<br>.<br>7<br>6<br>9 | 1.<br>0<br>5<br>E<br>-<br>0<br>8 | 0.<br>01 |  | 0 | 1 | 0 | 20<br>06<br>0<br>0<br>6 |
| Rh<br>eu<br>ma<br>toi<br>d<br>Ar<br>thr<br>itis | C<br>00<br>03<br>87<br>3 | CO<br>L12<br>A1 | 1<br>3<br>0<br>3           | Q997<br>15 | collagen<br>type XII<br>alpha 1<br>chain                     | Re<br>ce<br>pto<br>r                           | 93      | 0<br>.<br>6<br>1<br>5 | 0<br>.<br>6<br>9<br>2 | 0.<br>9<br>7<br>3<br>6<br>1      | 0.<br>01 |  | 1 | 1 | 0 | 20<br>15<br>0<br>1<br>5 |
| Rh<br>eu<br>ma<br>toi<br>d<br>Ar<br>thr<br>itis | C<br>00<br>03<br>87<br>3 | KL<br>F6        | 1<br>3<br>1<br>6           | Q996<br>12 | Kruppel<br>like<br>factor 6                                  | Nu<br>cle<br>ic<br>aci<br>d<br>bin<br>din<br>g | 20<br>4 | 0<br>.<br>5<br>0<br>1 | 0<br>.<br>8<br>4<br>6 | 0.<br>9<br>7<br>9<br>4<br>6      | 0.<br>01 |  | 1 | 1 | 0 | 20<br>18<br>0<br>1<br>8 |
| Rh<br>eu<br>ma<br>toi<br>d<br>Ar<br>thr<br>itis | C<br>00<br>03<br>87<br>3 | AD<br>AD<br>1   | 1<br>3<br>2<br>6<br>1<br>2 | Q96M<br>93 | adenosin<br>e<br>deamina<br>se<br>domain<br>containi<br>ng 1 | En<br>zy<br>me                                 | 8       | 0<br>.<br>8<br>2<br>1 | 0<br>.<br>2<br>6<br>9 | 0.<br>0<br>3<br>8<br>9<br>5<br>2 | 0.<br>01 |  | 1 | 1 | 1 | 20<br>10<br>0<br>1<br>0 |
| Rh<br>eu<br>ma<br>toi                           | C<br>00<br>03            | ZF<br>P42       | 1<br>3<br>2<br>6           | Q96M<br>M3 | ZFP42<br>zinc<br>finger<br>protein                           | Tr<br>ans<br>cri<br>pti                        | 30      | 0<br>.<br>6           | 0<br>.<br>3           |                                  | 0.<br>01 |  | 1 | 1 | 0 | 20<br>10<br>0<br>1<br>0 |

|                                                 |                          |                |                            |            |                                              |                                           |         |                       |                       |                                  |          |  |   |   |   |          |                  |
|-------------------------------------------------|--------------------------|----------------|----------------------------|------------|----------------------------------------------|-------------------------------------------|---------|-----------------------|-----------------------|----------------------------------|----------|--|---|---|---|----------|------------------|
| d<br>Ar<br>thr<br>itis                          | 87<br>3                  |                | 2<br>5                     |            |                                              | on<br>fac<br>tor                          |         | 7<br>8                | 4<br>6                |                                  |          |  |   |   |   |          |                  |
| Rh<br>eu<br>ma<br>toi<br>d<br>Ar<br>thr<br>itis | C<br>00<br>03<br>87<br>3 | CD<br>109      | 1<br>3<br>5<br>2<br>2<br>8 | Q6Y<br>HK3 | CD109<br>molecule                            |                                           | 81      | 0<br>.<br>5<br>9<br>5 | 0<br>.<br>6<br>5<br>4 | 2.<br>2<br>7<br>E<br>-<br>4<br>4 | 0.<br>01 |  | 1 | 1 | 0 | 20<br>19 | 2<br>0<br>1<br>9 |
| Rh<br>eu<br>ma<br>toi<br>d<br>Ar<br>thr<br>itis | C<br>00<br>03<br>87<br>3 | CP<br>A1       | 1<br>3<br>5<br>7           | P1508<br>5 | carboxy<br>peptidas<br>e A1                  | En<br>zy<br>me                            | 61      | 0<br>.<br>6<br>5      | 0<br>.<br>5<br>7<br>7 | 2.<br>6<br>6<br>E<br>-<br>1<br>1 | 0.<br>01 |  | 1 | 1 | 0 | 20<br>19 | 2<br>0<br>1<br>9 |
| Rh<br>eu<br>ma<br>toi<br>d<br>Ar<br>thr<br>itis | C<br>00<br>03<br>87<br>3 | CP<br>B2       | 1<br>3<br>6<br>1           | Q96I<br>Y4 | carboxy<br>peptidas<br>e B2                  | En<br>zy<br>me                            | 14<br>8 | 0<br>.<br>5<br>3<br>6 | 0<br>.<br>8<br>4<br>6 | 2.<br>7<br>1<br>E<br>-<br>1<br>7 | 0.<br>01 |  | 1 | 1 | 0 | 20<br>19 | 2<br>0<br>1<br>9 |
| Rh<br>eu<br>ma<br>toi<br>d<br>Ar<br>thr<br>itis | C<br>00<br>03<br>87<br>3 | CL<br>DN<br>7  | 1<br>3<br>6<br>6           | O954<br>71 | claudin<br>7                                 | Ce<br>ll-<br>cel<br>l<br>jun<br>cti<br>on | 19<br>2 | 0<br>.<br>4<br>9<br>4 | 0<br>.<br>8<br>0<br>8 | 0.<br>0<br>2<br>8<br>8<br>3      | 0.<br>01 |  | 1 | 1 | 0 | 20<br>18 | 2<br>0<br>1<br>8 |
| Rh<br>eu<br>ma<br>toi<br>d<br>Ar<br>thr<br>itis | C<br>00<br>03<br>87<br>3 | CP<br>OX       | 1<br>3<br>7<br>1           | P3655<br>1 | copropo<br>rphyrino<br>gen<br>oxidase        | En<br>zy<br>me                            | 24<br>6 | 0<br>.<br>4<br>8<br>8 | 0<br>.<br>8<br>4<br>6 | 0.<br>1<br>7<br>1<br>5<br>2      | 0.<br>01 |  | 1 | 1 | 0 | 20<br>00 | 2<br>0<br>0<br>0 |
| Rh<br>eu<br>ma<br>toi<br>d<br>Ar<br>thr<br>itis | C<br>00<br>03<br>87<br>3 | CR<br>AB<br>P1 | 1<br>3<br>8<br>1           | P2976<br>2 | cellular<br>retinoic<br>binding<br>protein 1 | acid                                      | 53      | 0<br>.<br>6<br>3<br>1 | 0<br>.<br>6<br>1<br>5 | 0.<br>0<br>0<br>5<br>8<br>7<br>8 | 0.<br>01 |  | 1 | 1 | 0 | 20<br>15 | 2<br>0<br>1<br>5 |

|                      |          |         |        |        |                                            |                            |     |       |       |          |      |  |   |   |   |      |      |
|----------------------|----------|---------|--------|--------|--------------------------------------------|----------------------------|-----|-------|-------|----------|------|--|---|---|---|------|------|
| Rheumatoid Arthritis | C0003873 | CRHR2   | 1395   | Q13324 | corticotropin releasing hormone receptor 2 | G-protein coupled receptor | 89  | 0.584 | 0.731 | 8.55E-17 | 0.01 |  | 1 | 1 | 0 | 2011 | 2011 |
| Rheumatoid Arthritis | C0003873 | CRKL    | 1399   | P46109 | CRK proto-oncogene, adaptor protein        | like                       | 140 | 0.553 | 0.769 | 0.44604  | 0.01 |  | 1 | 1 | 0 | 2013 | 2013 |
| Rheumatoid Arthritis | C0003873 | ADOR A3 | 140    | P0DMS8 | adenosine A3 receptor                      | G-protein coupled receptor | 36  | 0.682 | 0.5   | 0.00144  | 0.01 |  | 1 | 1 | 0 | 2019 | 2019 |
| Rheumatoid Arthritis | C0003873 | MUC17   | 140453 | Q685J3 | mucin 17, cell surface associated          |                            | 53  | 0.638 | 0.577 | 7.9E-63  | 0.01 |  | 1 | 1 | 0 | 2008 | 2008 |
| Rheumatoid Arthritis | C0003873 | NRSN1   | 140767 | Q8IZ57 | neurensin 1                                |                            | 76  | 0.64  | 0.731 | 0.00308  | 0.01 |  | 1 | 1 | 0 | 1989 | 1989 |
| Rheumatoid Arthritis | C0003873 | SIRPA   | 140885 | P78324 | signal regulatory protein alpha            | Signaling                  | 82  | 0.592 | 0.769 | 0.67197  | 0.01 |  | 1 | 1 | 0 | 2008 | 2008 |

|                      |          |          |        |        |                                                                     |                            |     |          |          |          |      |  |   |   |   |      |      |
|----------------------|----------|----------|--------|--------|---------------------------------------------------------------------|----------------------------|-----|----------|----------|----------|------|--|---|---|---|------|------|
| Rheumatoid Arthritis | C0003873 | CS E1L   | 1434   | P55060 | chromosome segregation 1 like                                       | Enzyme modulator           | 163 | 0.521    | 0.808    | 1        | 0.01 |  | 1 | 1 | 0 | 2001 | 2001 |
| Rheumatoid Arthritis | C0003873 | PIWI L4  | 143689 | Q7Z3Z4 | piwi RNA-mediated gene silencing 4                                  | like                       | 83  | 0.579    | 0.692    | 1.83E-06 | 0.01 |  | 1 | 1 | 0 | 2016 | 2016 |
| Rheumatoid Arthritis | C0003873 | CS F2RA  | 1438   | P15509 | colony stimulating factor 2 receptor subunit alpha                  | Signaling                  | 49  | 0.67     | 0.615    | 2.4E-10  | 0.01 |  | 1 | 1 | 0 | 1994 | 1994 |
| Rheumatoid Arthritis | C0003873 | CS F3R   | 1441   | Q99062 | colony stimulating factor 3 receptor                                | Signaling                  | 120 | 0.55     | 0.692    | 1.5E-10  | 0.01 |  | 1 | 1 | 0 | 2016 | 2016 |
| Rheumatoid Arthritis | C0003873 | OR 2A G1 | 144125 | Q9H205 | olfactory receptor family 2 subfamily AG member 1 (gene/pseudogene) | G-protein coupled receptor | 100 | 0.582    | 0.80E-11 | 3.12E-11 | 0.01 |  | 1 | 1 | 0 | 2008 | 2008 |
| Rheumatoid Arthritis | C0003873 | CS NK1E  | 1454   | P49674 | casein kinase 1 epsilon                                             |                            | 61  | 0.619926 | 0.69926  | 0.9926   | 0.01 |  | 1 | 1 | 0 | 2019 | 2019 |
| Rheumatoid Arthritis | C0003873 | PW AR1   | 145    |        | Prader Willi/Angelman                                               |                            | 246 | 0.7      | 0.7      |          | 0.01 |  | 1 | 1 | 0 | 2012 | 2012 |



|                                                 |                          |                     |                            |            |                                                                                                      |                                          |         |                       |                       |                                  |          |  |   |   |   |          |                  |
|-------------------------------------------------|--------------------------|---------------------|----------------------------|------------|------------------------------------------------------------------------------------------------------|------------------------------------------|---------|-----------------------|-----------------------|----------------------------------|----------|--|---|---|---|----------|------------------|
| to<br>id<br>Ar<br>thr<br>itis                   | 87<br>3                  |                     | 6<br>2<br>4                |            | an<br>RNA 1                                                                                          | region                                   |         | 4<br>9                | 6<br>9                |                                  |          |  |   |   |   |          | 1<br>2           |
| Rh<br>eu<br>ma<br>toi<br>d<br>Ar<br>thr<br>itis | C<br>00<br>03<br>87<br>3 | B3<br>GN<br>TL<br>1 | 1<br>4<br>6<br>7<br>1<br>2 | Q67F<br>W5 | UDP-<br>GlcNAc<br>:betaGal<br>beta-1,3-<br>N-<br>acetylgl<br>ucosami<br>nyltransf<br>erase<br>like 1 | En<br>zy<br>me                           | 12      | 0<br>.<br>7<br>6      | 0<br>.<br>3<br>4<br>6 | 4.<br>0<br>7<br>E<br>-<br>2<br>8 | 0.<br>01 |  | 1 | 1 | 0 | 19<br>88 | 1<br>9<br>8<br>8 |
| Rh<br>eu<br>ma<br>toi<br>d<br>Ar<br>thr<br>itis | C<br>00<br>03<br>87<br>3 | PT<br>PR<br>VP      | 1<br>4<br>8<br>7<br>1<br>3 |            | protein<br>tyrosine<br>phosphatase<br>receptor type<br>V, pseudogene                                 |                                          | 27      | 0<br>.<br>7<br>0<br>5 | 0<br>.<br>5<br>7<br>7 |                                  | 0.<br>01 |  | 1 | 1 | 0 | 20<br>16 | 2<br>0<br>1<br>6 |
| Rh<br>eu<br>ma<br>toi<br>d<br>Ar<br>thr<br>itis | C<br>00<br>03<br>87<br>3 | CT<br>H             | 1<br>4<br>9<br>1           | P3292<br>9 | cystathi<br>onine<br>gamma-<br>lyase                                                                 | En<br>zy<br>me                           | 93      | 0<br>.<br>5<br>7<br>8 | 0<br>.<br>6<br>1<br>5 | 7.<br>4<br>8<br>E<br>-<br>0<br>8 | 0.<br>01 |  | 1 | 1 | 0 | 20<br>19 | 2<br>0<br>1<br>9 |
| Rh<br>eu<br>ma<br>toi<br>d<br>Ar<br>thr<br>itis | C<br>00<br>03<br>87<br>3 | CT<br>RB<br>1       | 1<br>5<br>0<br>4           | P1753<br>8 | chymotr<br>ypsinog<br>en B1                                                                          | En<br>zy<br>me                           | 18      | 0<br>.<br>7<br>6      | 0<br>.<br>3<br>8<br>5 | 2.<br>4<br>2<br>E<br>-<br>0<br>6 | 0.<br>01 |  | 0 | 1 | 0 | 20<br>13 | 2<br>0<br>1<br>3 |
| Rh<br>eu<br>ma<br>toi<br>d<br>Ar<br>thr<br>itis | C<br>00<br>03<br>87<br>3 | CO<br>M<br>MD<br>1  | 1<br>5<br>0<br>6<br>8<br>4 | Q8N6<br>68 | copper<br>metabolism<br>domain<br>containing 1                                                       |                                          | 55      | 0<br>.<br>6<br>3<br>3 | 0<br>.<br>6<br>9<br>2 | 0.<br>2<br>2<br>0<br>1           | 0.<br>01 |  | 1 | 1 | 0 | 20<br>17 | 2<br>0<br>1<br>7 |
| Rh<br>eu<br>ma<br>toi<br>d<br>Ar                | C<br>00<br>03<br>87<br>3 | GP<br>BA<br>R1      | 1<br>5<br>1<br>3<br>0<br>6 | Q8TD<br>U6 | G<br>protein-<br>coupled<br>bile acid<br>receptor<br>1                                               | G-<br>pro<br>tei<br>n<br>co<br>upl<br>ed | 12<br>2 | 0<br>.<br>5<br>4<br>8 | 0<br>.<br>7<br>3<br>1 | 1.<br>3<br>6<br>E<br>-<br>0<br>9 | 0.<br>01 |  | 1 | 1 | 0 | 20<br>19 | 2<br>0<br>1<br>9 |

|                                                 |                          |                |                            |                       |                                           |                                             |         |                       |                            |                                  |          |  |   |   |   |          |                  |
|-------------------------------------------------|--------------------------|----------------|----------------------------|-----------------------|-------------------------------------------|---------------------------------------------|---------|-----------------------|----------------------------|----------------------------------|----------|--|---|---|---|----------|------------------|
| thr<br>itis                                     |                          |                |                            |                       |                                           | rec<br>ept<br>or                            |         |                       |                            |                                  |          |  |   |   |   |          |                  |
| Rh<br>eu<br>ma<br>toi<br>d<br>Ar<br>thr<br>itis | C<br>00<br>03<br>87<br>3 | RM<br>DN<br>2  | 1<br>5<br>1<br>3<br>9<br>3 | Q96L<br>Z7            | regulator of<br>microtubule<br>dynamics 2 |                                             | 13<br>7 | 0<br>.<br>5<br>3<br>1 | 0<br>.<br>7<br>6<br>9      | 4.<br>4<br>1<br>E<br>-<br>2<br>4 | 0.<br>01 |  | 1 | 1 | 0 | 20<br>19 | 2<br>0<br>1<br>9 |
| Rh<br>eu<br>ma<br>toi<br>d<br>Ar<br>thr<br>itis | C<br>00<br>03<br>87<br>3 | CT<br>SS       | 1<br>5<br>2<br>0           | P2577<br>4            | cathepsi<br>n S                           | En<br>zy<br>me                              | 13<br>1 | 0<br>.<br>5<br>3<br>9 | 0<br>.<br>7<br>3<br>1      | 0.<br>3<br>4<br>1<br>7<br>8      | 0.<br>01 |  | 1 | 1 | 0 | 20<br>02 | 2<br>0<br>0<br>2 |
| Rh<br>eu<br>ma<br>toi<br>d<br>Ar<br>thr<br>itis | C<br>00<br>03<br>87<br>3 | CU<br>X1       | 1<br>5<br>2<br>3           | P3988<br>0;Q13<br>948 | cut like<br>homeob<br>ox 1                | Tr<br>ans<br>cri<br>pti<br>on<br>fac<br>tor | 28<br>3 | 0<br>.<br>4<br>6<br>5 | 0<br>.<br>8<br>4<br>6      | 1                                | 0.<br>01 |  | 1 | 1 | 0 | 19<br>92 | 1<br>9<br>9<br>2 |
| Rh<br>eu<br>ma<br>toi<br>d<br>Ar<br>thr<br>itis | C<br>00<br>03<br>87<br>3 | CY<br>B5<br>A  | 1<br>5<br>2<br>8           | P0016<br>7            | cytochro<br>me b5<br>type A               | En<br>zy<br>me                              | 95      | 0<br>.<br>6<br>0<br>1 | 0<br>.<br>6<br>5<br>4      | 0.<br>0<br>0<br>1<br>5<br>8<br>2 | 0.<br>01 |  | 1 | 1 | 1 | 20<br>15 | 2<br>0<br>1<br>5 |
| Rh<br>eu<br>ma<br>toi<br>d<br>Ar<br>thr<br>itis | C<br>00<br>03<br>87<br>3 | CR<br>EB<br>RF | 1<br>5<br>3<br>2<br>2<br>2 | Q8IU<br>R6            | CREB3<br>regulatory<br>factor             |                                             | 50      | 0<br>.<br>6<br>3<br>6 | 0<br>.<br>5<br>9<br>9<br>7 | 0.<br>9<br>9<br>9<br>7           | 0.<br>01 |  | 1 | 1 | 0 | 20<br>11 | 2<br>0<br>1<br>1 |
| Rh<br>eu<br>ma<br>toi<br>d<br>Ar<br>thr<br>itis | C<br>00<br>03<br>87<br>3 | CY<br>BA       | 1<br>5<br>3<br>5           | P1349<br>8            | cytochrome b-<br>245 alpha<br>chain       |                                             | 17<br>7 | 0<br>.<br>5<br>2      | 0<br>.<br>7<br>6<br>9      | 8.<br>8<br>7<br>E<br>-<br>0<br>6 | 0.<br>01 |  | 1 | 1 | 0 | 20<br>18 | 2<br>0<br>1<br>8 |
| Rh<br>eu<br>ma                                  | C<br>00<br>03            | CY<br>LD       | 1<br>5                     | Q9N<br>QC7            | CYLD<br>lysine 63                         | En<br>zy<br>me                              | 21<br>1 | 0<br>.<br>4           | 0<br>.<br>8                | 0.<br>9<br>9                     | 0.<br>01 |  | 1 | 1 | 0 | 20<br>05 | 2<br>0           |

|                                                 |                          |                     |                            |            |                                                                   |                                                              |         |                       |                       |                                  |          |  |   |   |   |          |                  |
|-------------------------------------------------|--------------------------|---------------------|----------------------------|------------|-------------------------------------------------------------------|--------------------------------------------------------------|---------|-----------------------|-----------------------|----------------------------------|----------|--|---|---|---|----------|------------------|
| to<br>id<br>Ar<br>thr<br>itis                   | 87<br>3                  |                     | 4<br>0                     |            | deubiqui<br>tinase                                                |                                                              |         | 9<br>8                | 4<br>6                | 9<br>9<br>3                      |          |  |   |   |   |          | 0<br>5           |
| Rh<br>eu<br>ma<br>toi<br>d<br>Ar<br>thr<br>itis | C<br>00<br>03<br>87<br>3 | CY<br>P1<br>A1      | 1<br>5<br>4<br>3           | P0479<br>8 | cytochro<br>me P450<br>family 1<br>subfamil<br>y A<br>member<br>1 | En<br>zy<br>me                                               | 37<br>9 | 0<br>.<br>4<br>3<br>6 | 0<br>.<br>8<br>4<br>6 | 1.<br>0<br>6<br>E<br>-<br>1<br>7 | 0.<br>01 |  | 0 | 1 | 1 | 20<br>03 | 2<br>0<br>0<br>3 |
| Rh<br>eu<br>ma<br>toi<br>d<br>Ar<br>thr<br>itis | C<br>00<br>03<br>87<br>3 | AM<br>OT            | 1<br>5<br>4<br>7<br>9<br>6 | Q4VC<br>S5 | angiometin                                                        |                                                              | 52      | 0<br>.<br>6<br>4<br>1 | 0<br>.<br>5<br>3<br>8 | 0.<br>9<br>9<br>6<br>6           | 0.<br>01 |  | 1 | 1 | 0 | 20<br>09 | 2<br>0<br>0<br>9 |
| Rh<br>eu<br>ma<br>toi<br>d<br>Ar<br>thr<br>itis | C<br>00<br>03<br>87<br>3 | AD<br>RB<br>3       | 1<br>5<br>5                | P1394<br>5 | adrenoc<br>eptor<br>beta 3                                        | G-<br>pro<br>tei<br>n<br>co<br>upl<br>ed<br>rec<br>ept<br>or | 14<br>2 | 0<br>.<br>5<br>3<br>3 | 0<br>.<br>7<br>3<br>1 | 2.<br>4<br>6<br>E<br>-<br>0<br>7 | 0.<br>01 |  | 1 | 1 | 0 | 20<br>03 | 2<br>0<br>0<br>3 |
| Rh<br>eu<br>ma<br>toi<br>d<br>Ar<br>thr<br>itis | C<br>00<br>03<br>87<br>3 | CY<br>P2<br>B6      | 1<br>5<br>5<br>5           | P2081<br>3 | cytochrome<br>P450 family 2<br>subfamily B<br>member 6            |                                                              | 38<br>8 | 0<br>.<br>4<br>2<br>8 | 0<br>.<br>8<br>4<br>6 | 1.<br>9<br>3<br>E<br>-<br>1<br>0 | 0.<br>01 |  | 1 | 1 | 1 | 19<br>94 | 1<br>9<br>9<br>4 |
| Rh<br>eu<br>ma<br>toi<br>d<br>Ar<br>thr<br>itis | C<br>00<br>03<br>87<br>3 | CY<br>P2<br>C1<br>9 | 1<br>5<br>5<br>7           | P3326<br>1 | cytochrome<br>P450 family 2<br>subfamily C<br>member 19           |                                                              | 27<br>4 | 0<br>.<br>4<br>6<br>7 | 0<br>.<br>8<br>4<br>6 | 6.<br>4<br>9<br>E<br>-<br>2<br>0 | 0.<br>01 |  | 1 | 1 | 0 | 20<br>12 | 2<br>0<br>1<br>2 |
| Rh<br>eu<br>ma<br>toi<br>d<br>Ar                | C<br>00<br>03<br>87<br>3 | CY<br>P2<br>E1      | 1<br>5<br>7<br>1           | P0518<br>1 | cytochrome<br>P450 family 2<br>subfamily E<br>member 1            |                                                              | 30<br>6 | 0<br>.<br>4<br>5<br>9 | 0<br>.<br>8<br>8<br>5 | 8.<br>0<br>7<br>E<br>-<br>0<br>9 | 0.<br>01 |  | 1 | 1 | 0 | 20<br>18 | 2<br>0<br>1<br>8 |

|                                                 |                          |                |                            |            |                                                        |                      |         |                       |                       |                                  |          |  |   |   |   |          |                  |
|-------------------------------------------------|--------------------------|----------------|----------------------------|------------|--------------------------------------------------------|----------------------|---------|-----------------------|-----------------------|----------------------------------|----------|--|---|---|---|----------|------------------|
| thr<br>itis                                     |                          |                |                            |            |                                                        |                      |         |                       |                       |                                  |          |  |   |   |   |          |                  |
| Rh<br>eu<br>ma<br>toi<br>d<br>Ar<br>thr<br>itis | C<br>00<br>03<br>87<br>3 | CY<br>P3<br>A4 | 1<br>5<br>7<br>6           | P0868<br>4 | cytochrome P450<br>family 3<br>subfamily A<br>member 4 | En<br>zy<br>me       | 29<br>1 | 0<br>.<br>4<br>6<br>2 | 0<br>.<br>8<br>8<br>5 | 5.<br>8<br>E<br>-<br>1<br>1      | 0.<br>01 |  | 1 | 1 | 0 | 20<br>17 | 2<br>0<br>1<br>7 |
| Rh<br>eu<br>ma<br>toi<br>d<br>Ar<br>thr<br>itis | C<br>00<br>03<br>87<br>3 | DC<br>C        | 1<br>6<br>3<br>0           | P4314<br>6 | DCC netrin 1<br>receptor                               |                      | 27<br>9 | 0<br>.<br>4<br>7<br>1 | 0<br>.<br>8<br>0<br>8 | 0.<br>9<br>9<br>4<br>4<br>8      | 0.<br>01 |  | 0 | 1 | 1 | 20<br>03 | 2<br>0<br>0<br>3 |
| Rh<br>eu<br>ma<br>toi<br>d<br>Ar<br>thr<br>itis | C<br>00<br>03<br>87<br>3 | DC<br>K        | 1<br>6<br>3<br>3           | P2770<br>7 | deoxycy<br>tidine<br>kinase                            | Ki<br>nas<br>e       | 10<br>2 | 0<br>.<br>5<br>6<br>1 | 0<br>.<br>6<br>9<br>2 | 1.<br>5<br>5<br>E<br>-<br>0<br>5 | 0.<br>01 |  | 1 | 1 | 0 | 20<br>13 | 2<br>0<br>1<br>3 |
| Rh<br>eu<br>ma<br>toi<br>d<br>Ar<br>thr<br>itis | C<br>00<br>03<br>87<br>3 | IFN<br>LR<br>1 | 1<br>6<br>3<br>7<br>0<br>2 | Q8IU<br>57 | interfero<br>n<br>lambda<br>receptor<br>1              | Re<br>ce<br>pto<br>r | 40      | 0<br>.<br>6<br>4<br>7 | 0<br>.<br>6<br>1<br>5 | 0.<br>0<br>6<br>2<br>5<br>3<br>2 | 0.<br>01 |  | 1 | 1 | 0 | 20<br>13 | 2<br>0<br>1<br>3 |
| Rh<br>eu<br>ma<br>toi<br>d<br>Ar<br>thr<br>itis | C<br>00<br>03<br>87<br>3 | KA<br>NK<br>4  | 1<br>6<br>3<br>7<br>8<br>2 | Q5T7<br>N3 | KN motif and<br>ankyrin repeat<br>domains 4            |                      | 7       | 0<br>.<br>8<br>3<br>9 | 0<br>.<br>2<br>6<br>9 | 2.<br>0<br>7<br>E<br>-<br>0<br>9 | 0.<br>01 |  | 1 | 1 | 0 | 20<br>14 | 2<br>0<br>1<br>4 |
| Rh<br>eu<br>ma<br>toi<br>d<br>Ar<br>thr<br>itis | C<br>00<br>03<br>87<br>3 | DE<br>FA<br>1  | 1<br>6<br>6<br>7           | P5966<br>5 | defensin alpha<br>1                                    |                      | 57      | 0<br>.<br>6<br>3<br>6 | 0<br>.<br>7<br>3<br>1 |                                  | 0.<br>01 |  | 1 | 1 | 0 | 20<br>03 | 2<br>0<br>0<br>3 |
| Rh<br>eu<br>ma<br>toi                           | C<br>00<br>03            | DE<br>FA<br>3  | 1<br>6<br>6<br>8           | P5966<br>6 | defensin alpha<br>3                                    |                      | 23      | 0<br>.<br>7           | 0<br>.<br>5           | 0.<br>0<br>9<br>0                | 0.<br>01 |  | 1 | 1 | 0 | 20<br>03 | 2<br>0<br>0<br>3 |

|                                                 |                          |               |                            |            |                                                        |                |         |                       |                       |                                  |          |  |   |   |   |          |                  |
|-------------------------------------------------|--------------------------|---------------|----------------------------|------------|--------------------------------------------------------|----------------|---------|-----------------------|-----------------------|----------------------------------|----------|--|---|---|---|----------|------------------|
| d<br>Ar<br>thr<br>itis                          | 87<br>3                  |               |                            |            |                                                        |                |         | 1<br>6                | 3<br>8                | 5<br>4<br>6                      |          |  |   |   |   |          |                  |
| Rh<br>eu<br>ma<br>toi<br>d<br>Ar<br>thr<br>itis | C<br>00<br>03<br>87<br>3 | ID<br>O2      | 1<br>6<br>9<br>3<br>5<br>5 | Q6ZQ<br>W0 | indoleamine<br>2,3-<br>dioxygenase 2                   |                | 31      | 0<br>.<br>6<br>9<br>5 | 0<br>.<br>5<br>7<br>7 | 3.<br>1<br>4<br>E<br>-<br>0<br>9 | 0.<br>01 |  | 1 | 1 | 0 | 20<br>17 | 2<br>0<br>1<br>7 |
| Rh<br>eu<br>ma<br>toi<br>d<br>Ar<br>thr<br>itis | C<br>00<br>03<br>87<br>3 | AA<br>VS<br>1 | 1<br>7                     |            | adeno-<br>associated<br>virus<br>integration site<br>1 |                | 78      | 0<br>.<br>5<br>9<br>5 | 0<br>.<br>7<br>3<br>1 |                                  | 0.<br>01 |  | 1 | 1 | 0 | 20<br>06 | 2<br>0<br>0<br>6 |
| Rh<br>eu<br>ma<br>toi<br>d<br>Ar<br>thr<br>itis | C<br>00<br>03<br>87<br>3 | NQ<br>O1      | 1<br>7<br>2<br>8           | P1555<br>9 | NAD(P)H<br>quinone<br>dehydrogenas<br>e 1              |                | 36<br>8 | 0<br>.<br>4<br>3<br>4 | 0<br>.<br>8<br>8<br>5 | 1.<br>1<br>9<br>E<br>-<br>0<br>9 | 0.<br>01 |  | 1 | 1 | 0 | 20<br>18 | 2<br>0<br>1<br>8 |
| Rh<br>eu<br>ma<br>toi<br>d<br>Ar<br>thr<br>itis | C<br>00<br>03<br>87<br>3 | SA<br>RD<br>H | 1<br>7<br>5<br>7           | Q9UL<br>12 | sarcosin<br>e<br>dehydro<br>genase                     | En<br>zy<br>me | 16<br>6 | 0<br>.<br>5<br>2<br>3 | 0<br>.<br>8<br>4<br>6 | 5.<br>2<br>7<br>E<br>-<br>1<br>6 | 0.<br>01 |  | 1 | 1 | 0 | 20<br>04 | 2<br>0<br>0<br>4 |
| Rh<br>eu<br>ma<br>toi<br>d<br>Ar<br>thr<br>itis | C<br>00<br>03<br>87<br>3 | DN<br>AH<br>8 | 1<br>7<br>6<br>9           | Q96J<br>B1 | dynein<br>axonem<br>al heavy<br>chain 8                | En<br>zy<br>me | 12<br>0 | 0<br>.<br>5<br>5<br>6 | 0<br>.<br>7<br>3<br>1 | 1.<br>1<br>5<br>E<br>-<br>6<br>0 | 0.<br>01 |  | 1 | 1 | 0 | 20<br>16 | 2<br>0<br>1<br>6 |
| Rh<br>eu<br>ma<br>toi<br>d<br>Ar<br>thr<br>itis | C<br>00<br>03<br>87<br>3 | DO<br>CK<br>2 | 1<br>7<br>9<br>4           | Q926<br>08 | dedicator of<br>cytokinesis 2                          |                | 40      | 0<br>.<br>6<br>7<br>4 | 0<br>.<br>4<br>6<br>2 | 0.<br>9<br>9<br>9<br>6<br>9      | 0.<br>01 |  | 1 | 1 | 0 | 20<br>19 | 2<br>0<br>1<br>9 |

|                      |          |        |      |        |                                        |                            |     |       |       |          |      |  |   |   |   |      |      |
|----------------------|----------|--------|------|--------|----------------------------------------|----------------------------|-----|-------|-------|----------|------|--|---|---|---|------|------|
| Rheumatoid Arthritis | C0003873 | AGT    | 183  | P01019 | angiotensinogen                        | Enzyme modulator           | 765 | 0.367 | 0.923 | 4.97E-08 | 0.01 |  | 1 | 1 | 0 | 2018 | 2018 |
| Rheumatoid Arthritis | C0003873 | DSPP   | 1834 | Q9NZW4 | dentin sialophosphoprotein             |                            | 114 | 0.556 | 0.769 | 1.12E-07 | 0.01 |  | 1 | 1 | 0 | 2018 | 2018 |
| Rheumatoid Arthritis | C0003873 | DUSP2  | 1844 | Q05923 | dual specificity phosphatase 2         |                            | 118 | 0.558 | 0.769 | 4.47E-05 | 0.01 |  | 1 | 1 | 0 | 2018 | 2018 |
| Rheumatoid Arthritis | C0003873 | AGTR1  | 185  | P30556 | angiotensin II receptor type 1         | G-protein coupled receptor | 440 | 0.423 | 0.846 | 0.00532  | 0.01 |  | 1 | 1 | 0 | 2018 | 2018 |
| Rheumatoid Arthritis | C0003873 | DUSP8  | 1850 | Q13202 | dual specificity phosphatase 8         |                            | 12  | 0.769 | 0.385 | 0.6975   | 0.01 |  | 1 | 1 | 0 | 2001 | 2001 |
| Rheumatoid Arthritis | C0003873 | DVL2   | 1856 | O14641 | dishevelled segment polarity protein 2 | Signaling                  | 58  | 0.621 | 0.577 | 1.36E-05 | 0.01 |  | 1 | 1 | 0 | 2017 | 2017 |
| Rheumatoid           | C0003    | DYRK1A | 1859 | Q13627 | dual specificity tyrosine              | Kinase                     | 212 | 0.5   | 0.799 | 0.999    | 0.01 |  | 0 | 1 | 0 | 2018 | 2018 |

|                                                 |                          |               |                  |            |                                                      |                                                  |         |                       |                       |                                  |          |  |   |   |   |          |                  |
|-------------------------------------------------|--------------------------|---------------|------------------|------------|------------------------------------------------------|--------------------------------------------------|---------|-----------------------|-----------------------|----------------------------------|----------|--|---|---|---|----------|------------------|
| d<br>Ar<br>thr<br>itis                          | 87<br>3                  |               |                  |            | phospho<br>rylation<br>regulate<br>d kinase<br>1A    |                                                  |         | 3<br>3                | 6<br>9                | 6<br>7                           |          |  |   |   |   |          |                  |
| Rh<br>eu<br>ma<br>toi<br>d<br>Ar<br>thr<br>itis | C<br>00<br>03<br>87<br>3 | AG<br>TR<br>2 | 1<br>8<br>6      | P5005<br>2 | angioten<br>sin II<br>receptor<br>type 2             | G-pro<br>tein<br>cou<br>pled<br>rec<br>ept<br>or | 22<br>9 | 0<br>.<br>4<br>9<br>6 | 0<br>.<br>8<br>0<br>8 | 0.<br>0<br>8<br>2<br>3<br>5      | 0.<br>01 |  | 1 | 1 | 0 | 20<br>17 | 2<br>0<br>1<br>7 |
| Rh<br>eu<br>ma<br>toi<br>d<br>Ar<br>thr<br>itis | C<br>00<br>03<br>87<br>3 | S1P<br>R3     | 1<br>9<br>0<br>3 | Q995<br>00 | sphingos<br>ine-1-<br>phospha<br>te<br>receptor<br>3 | G-pro<br>tein<br>cou<br>pled<br>rec<br>ept<br>or | 47      | 0<br>.<br>6<br>3<br>8 | 0<br>.<br>6<br>5<br>4 | 0.<br>0<br>4<br>6<br>9<br>4<br>5 | 0.<br>01 |  | 1 | 1 | 0 | 20<br>08 | 2<br>0<br>0<br>8 |
| Rh<br>eu<br>ma<br>toi<br>d<br>Ar<br>thr<br>itis | C<br>00<br>03<br>87<br>3 | ED<br>NR<br>B | 1<br>9<br>1<br>0 | P2453<br>0 | endothel<br>in<br>receptor<br>type B                 | G-pro<br>tein<br>cou<br>pled<br>rec<br>ept<br>or | 30<br>0 | 0<br>.<br>4<br>7      | 0<br>.<br>8<br>4<br>6 | 0.<br>0<br>9<br>2<br>4<br>2      | 0.<br>01 |  | 1 | 1 | 0 | 19<br>99 | 1<br>9<br>9<br>9 |
| Rh<br>eu<br>ma<br>toi<br>d<br>Ar<br>thr<br>itis | C<br>00<br>03<br>87<br>3 | EF<br>NB<br>2 | 1<br>9<br>4<br>8 | P5279<br>9 | ephrin<br>B2                                         | Sig<br>nal<br>ing                                | 10<br>9 | 0<br>.<br>5<br>6<br>1 | 0<br>.<br>6<br>9<br>2 | 0.<br>9<br>8<br>8<br>4<br>5      | 0.<br>01 |  | 1 | 1 | 0 | 20<br>15 | 2<br>0<br>1<br>5 |
| Rh<br>eu<br>ma<br>toi<br>d<br>Ar<br>thr<br>itis | C<br>00<br>03<br>87<br>3 | EG<br>R2      | 1<br>9<br>5<br>9 | P1116<br>1 | early<br>growth<br>response<br>2                     | Nu<br>cle<br>ic<br>aci<br>d<br>bin<br>din<br>g   | 13<br>3 | 0<br>.<br>5<br>4<br>7 | 0<br>.<br>7<br>6<br>9 | 0.<br>5<br>0<br>2<br>9<br>2      | 0.<br>01 |  | 1 | 1 | 0 | 20<br>10 | 2<br>0<br>1<br>0 |
| Rh<br>eu<br>ma                                  | C<br>00<br>03            | AH<br>SG      | 1<br>9<br>7      | P0276<br>5 | alpha 2-<br>HS                                       | En<br>zy<br>me                                   | 20<br>4 | 0<br>.<br>5           | 0<br>.<br>8           | 3.<br>2<br>1                     | 0.<br>01 |  | 1 | 1 | 0 | 20<br>17 | 2<br>0           |

|                                                 |                          |                |                            |            |                                                                               |                                                |         |                       |                       |                                  |          |  |   |   |   |          |                  |
|-------------------------------------------------|--------------------------|----------------|----------------------------|------------|-------------------------------------------------------------------------------|------------------------------------------------|---------|-----------------------|-----------------------|----------------------------------|----------|--|---|---|---|----------|------------------|
| to<br>id<br>Ar<br>thr<br>itis                   | 87<br>3                  |                |                            |            | glycopro<br>tein                                                              | mo<br>dul<br>ato<br>r                          |         | 0<br>6                | 4<br>6                | E<br>-<br>1<br>0                 |          |  |   |   |   |          | 1<br>7           |
| Rh<br>eu<br>ma<br>toi<br>d<br>Ar<br>thr<br>itis | C<br>00<br>03<br>87<br>3 | NL<br>RC<br>3  | 1<br>9<br>7<br>3<br>5<br>8 | Q7RT<br>R2 | NLR<br>family<br>CARD<br>domain<br>containi<br>ng 3                           | En<br>zy<br>me                                 | 21      | 0<br>.<br>7<br>6<br>9 | 0<br>.<br>2<br>6<br>9 | 2.<br>2<br>3<br>E<br>-<br>2<br>5 | 0.<br>01 |  | 1 | 1 | 0 | 20<br>17 | 2<br>0<br>1<br>7 |
| Rh<br>eu<br>ma<br>toi<br>d<br>Ar<br>thr<br>itis | C<br>00<br>03<br>87<br>3 | EIF<br>4E      | 1<br>9<br>7<br>7           | P0673<br>0 | eukaryot<br>ic<br>translati<br>on<br>initiatio<br>n factor<br>4E              | Nu<br>cle<br>ic<br>aci<br>d<br>bin<br>din<br>g | 31<br>7 | 0<br>.<br>4<br>4<br>8 | 0<br>.<br>8<br>4<br>6 | 0.<br>9<br>4<br>1<br>3<br>3      | 0.<br>01 |  | 1 | 1 | 0 | 20<br>18 | 2<br>0<br>1<br>8 |
| Rh<br>eu<br>ma<br>toi<br>d<br>Ar<br>thr<br>itis | C<br>00<br>03<br>87<br>3 | EIF<br>4G<br>1 | 1<br>9<br>8<br>1           | Q046<br>37 | eukaryot<br>ic<br>translati<br>on<br>initiatio<br>n factor<br>4<br>gamma<br>1 | Nu<br>cle<br>ic<br>aci<br>d<br>bin<br>din<br>g | 13<br>9 | 0<br>.<br>5<br>5<br>3 | 0<br>.<br>8<br>0<br>8 | 1                                | 0.<br>01 |  | 1 | 1 | 0 | 20<br>06 | 2<br>0<br>0<br>6 |
| Rh<br>eu<br>ma<br>toi<br>d<br>Ar<br>thr<br>itis | C<br>00<br>03<br>87<br>3 | EL<br>AN<br>E  | 1<br>9<br>9<br>1           | P0824<br>6 | elastase,<br>neutroph<br>il<br>expresse<br>d                                  | En<br>zy<br>me                                 | 34<br>6 | 0<br>.<br>4<br>4<br>7 | 0<br>.<br>8<br>4<br>6 | 0.<br>0<br>0<br>1<br>2<br>2<br>7 | 0.<br>01 |  | 1 | 1 | 1 | 20<br>14 | 2<br>0<br>1<br>4 |
| Rh<br>eu<br>ma<br>toi<br>d<br>Ar<br>thr<br>itis | C<br>00<br>03<br>87<br>3 | A2<br>M        | 2                          | P0102<br>3 | alpha-2-<br>macrogl<br>obulin                                                 | En<br>zy<br>me<br>mo<br>dul<br>ato<br>r        | 14<br>7 | 0<br>.<br>5<br>2<br>9 | 0<br>.<br>7<br>6<br>9 | 4.<br>5<br>2<br>E<br>-<br>1<br>1 | 0.<br>01 |  | 1 | 1 | 0 | 19<br>99 | 1<br>9<br>9<br>9 |
| Rh<br>eu<br>ma<br>toi<br>d<br>Ar<br>thr<br>itis | C<br>00<br>03<br>87<br>3 | EL<br>N        | 2<br>0<br>0<br>6           | P1550<br>2 | elastin                                                                       |                                                | 54<br>5 | 0<br>.<br>4<br>1<br>5 | 0<br>.<br>8<br>8<br>5 | 2.<br>1<br>4<br>E<br>-<br>1<br>4 | 0.<br>01 |  | 1 | 1 | 0 | 20<br>19 | 2<br>0<br>1<br>9 |



|                      |          |         |         |        |                                                |        |     |       |         |          |      |  |   |   |   |      |      |
|----------------------|----------|---------|---------|--------|------------------------------------------------|--------|-----|-------|---------|----------|------|--|---|---|---|------|------|
| Rheumatoid Arthritis | C0003873 | EMD     | 2010    | P50402 | emerin                                         |        | 163 | 0.542 | 0.73178 | 0.93178  | 0.01 |  | 1 | 1 | 0 | 2017 | 2017 |
| Rheumatoid Arthritis | C0003873 | MA RK2  | 2011    | Q7KZI7 | microtubule affinity regulating kinase 2       | Kinase | 115 | 0.555 | 0.692   | 0.999    | 0.01 |  | 1 | 1 | 0 | 2012 | 2012 |
| Rheumatoid Arthritis | C0003873 | TIGIT   | 201633  | Q495A1 | T cell immunoreceptor with Ig and ITIM domains |        | 56  | 0.623 | 0.538   | 0.017915 | 0.01 |  | 0 | 1 | 0 | 2019 | 2019 |
| Rheumatoid Arthritis | C0003873 | ENG     | 20022   | P17813 | endoglin                                       |        | 371 | 0.446 | 0.846   | 0.9958   | 0.01 |  | 1 | 1 | 0 | 2003 | 2003 |
| Rheumatoid Arthritis | C0003873 | C9orf72 | 2003228 | Q96LT7 | C9orf72-SMCR8 complex subunit                  |        | 258 | 0.496 | 0.769   | 1.06-06  | 0.01 |  | 1 | 1 | 0 | 2019 | 2019 |
| Rheumatoid Arthritis | C0003873 | EPHA1   | 20041   | P21709 | EPH receptor A1                                | Kinase | 119 | 0.544 | 0.731   | 1.46E-23 | 0.01 |  | 1 | 1 | 0 | 2008 | 2008 |
| Rheumatoid Ar        | C0003873 | EPHA3   | 20042   | P29320 | EPH receptor A3                                | Kinase | 193 | 0.497 | 0.692   | 1.2E-05  | 0.01 |  | 1 | 1 | 0 | 2004 | 2004 |

| thritis              |          |       |        |        |                                                             |           |     |        |          |         |      |   |   |   |      |      |      |
|----------------------|----------|-------|--------|--------|-------------------------------------------------------------|-----------|-----|--------|----------|---------|------|---|---|---|------|------|------|
| Rheumatoid Arthritis | C0003873 | CLN8  | 2055   | Q9UBY8 | CLN8 transmembrane ER and ERGIC protein                     |           | 50  | 0.682  | 0.423559 | 0.01    |      | 1 | 1 | 0 | 2007 | 2007 |      |
| Rheumatoid Arthritis | C0003873 | EP0   | 2056   | P01588 | erythropoietin                                              |           | 646 | 0.3815 | 0.8125   | 0.01    |      | 1 | 1 | 0 | 2019 | 2019 |      |
| Rheumatoid Arthritis | C0003873 | LV RN | 206338 | Q6Q4G3 | laeverin                                                    | Enzyme    | 7   | 0.89   | 0.192    | 5.3E-17 | 0.01 |   | 1 | 1 | 0    | 2006 | 2006 |
| Rheumatoid Arthritis | C0003873 | ERBB3 | 2065   | P21860 | erb-b2 receptor tyrosine kinase 3                           | Kinase    | 318 | 0.448  | 0.8085   | 1.7E-15 | 0.01 |   | 1 | 1 | 0    | 2016 | 2016 |
| Rheumatoid Arthritis | C0003873 | ERCC2 | 2068   | P18074 | ERCC excision repair 2, TFIIH core complex helicase subunit | Enzyme    | 499 | 0.42   | 0.846    | 7.0E-20 | 0.01 |   | 1 | 1 | 0    | 2015 | 2015 |
| Rheumatoid Arthritis | C0003873 | EREG  | 2069   | O14944 | epiregulin                                                  | Signaling | 121 | 0.554  | 0.692    | 1.7E-05 | 0.01 |   | 1 | 1 | 0    | 2014 | 2014 |
| Rheumatoid           | C0003    | AKT2  | 208    | P31751 | AKT serine/threonine kinase 2                               | Kinase    | 264 | 0.4    | 0.74     | 0.644   | 0.01 |   | 1 | 1 | 0    | 2018 | 2018 |

|                                                 |                          |                |                  |            |                                                              |                                     |         |                       |                       |                                  |          |  |   |   |   |          |                  |
|-------------------------------------------------|--------------------------|----------------|------------------|------------|--------------------------------------------------------------|-------------------------------------|---------|-----------------------|-----------------------|----------------------------------|----------|--|---|---|---|----------|------------------|
| d<br>Ar<br>thr<br>itis                          | 87<br>3                  |                |                  |            |                                                              |                                     |         | 7<br>4                | 6<br>9                | 3<br>2                           |          |  |   |   |   |          |                  |
| Rh<br>eu<br>ma<br>toi<br>d<br>Ar<br>thr<br>itis | C<br>00<br>03<br>87<br>3 | ER<br>V3-<br>1 | 2<br>0<br>8<br>6 | Q142<br>64 | endogenous<br>retrovirus<br>group 3<br>member 1,<br>envelope |                                     | 27      | 0<br>.<br>7           | 0<br>.<br>4<br>2<br>3 |                                  | 0.<br>01 |  | 0 | 1 | 0 | 19<br>95 | 1<br>9<br>9<br>5 |
| Rh<br>eu<br>ma<br>toi<br>d<br>Ar<br>thr<br>itis | C<br>00<br>03<br>87<br>3 | ES<br>RR<br>B  | 2<br>1<br>0<br>3 | O957<br>18 | estrogen<br>related<br>receptor<br>beta                      | Nu<br>cle<br>ar<br>rec<br>ept<br>or | 10<br>2 | 0<br>.<br>5<br>6<br>5 | 0<br>.<br>8<br>4<br>6 | 0.<br>1<br>2<br>6<br>0<br>9      | 0.<br>01 |  | 1 | 1 | 0 | 20<br>17 | 2<br>0<br>1<br>7 |
| Rh<br>eu<br>ma<br>toi<br>d<br>Ar<br>thr<br>itis | C<br>00<br>03<br>87<br>3 | ME<br>CO<br>M  | 2<br>1<br>2<br>2 | Q031<br>12 | MDS1 and<br>EVI1 complex<br>locus                            |                                     | 19<br>1 | 0<br>.<br>5<br>1<br>3 | 0<br>.<br>7<br>3<br>1 | 1                                | 0.<br>01 |  | 1 | 1 | 0 | 20<br>17 | 2<br>0<br>1<br>7 |
| Rh<br>eu<br>ma<br>toi<br>d<br>Ar<br>thr<br>itis | C<br>00<br>03<br>87<br>3 | EX<br>T1       | 2<br>1<br>3<br>1 | Q163<br>94 | exostosin<br>glycosyl<br>transferase 1                       | En<br>zy<br>me                      | 20<br>5 | 0<br>.<br>5<br>2<br>2 | 0<br>.<br>7<br>6<br>9 | 0.<br>9<br>9<br>7<br>3<br>2      | 0.<br>01 |  | 1 | 1 | 0 | 20<br>05 | 2<br>0<br>0<br>5 |
| Rh<br>eu<br>ma<br>toi<br>d<br>Ar<br>thr<br>itis | C<br>00<br>03<br>87<br>3 | AL<br>CA<br>M  | 2<br>1<br>4      | Q137<br>40 | activate<br>d leukocyt<br>e cell<br>adhesion<br>molecul<br>e | Ce<br>ll<br>ad<br>hes<br>ion        | 18<br>1 | 0<br>.<br>5<br>0<br>2 | 0<br>.<br>8<br>0<br>8 | 0.<br>7<br>3<br>2<br>6<br>7      | 0.<br>01 |  | 1 | 1 | 0 | 20<br>16 | 2<br>0<br>1<br>6 |
| Rh<br>eu<br>ma<br>toi<br>d<br>Ar<br>thr<br>itis | C<br>00<br>03<br>87<br>3 | F10            | 2<br>1<br>5<br>9 | P0074<br>2 | coagulat<br>ion<br>factor X                                  | En<br>zy<br>me                      | 22<br>8 | 0<br>.<br>4<br>9<br>3 | 0<br>.<br>7<br>6<br>9 | 2.<br>3<br>5<br>E<br>-<br>0<br>6 | 0.<br>01 |  | 1 | 1 | 0 | 20<br>17 | 2<br>0<br>1<br>7 |

|                      |          |         |        |        |                                           |          |     |       |       |          |      |  |   |   |   |      |      |
|----------------------|----------|---------|--------|--------|-------------------------------------------|----------|-----|-------|-------|----------|------|--|---|---|---|------|------|
| Rheumatoid Arthritis | C0003873 | ALDH2   | 217    | P05091 | aldehyde dehydrogenase 2 family member    | Enzyme   | 337 | 0.457 | 0.885 | 3.4E-10  | 0.01 |  | 1 | 1 | 0 | 1994 | 1994 |
| Rheumatoid Arthritis | C0003873 | FABP5   | 2171   | Q01469 | fatty acid binding protein 5              |          | 85  | 0.585 | 0.731 | 0.04708  | 0.01 |  | 1 | 1 | 0 | 2018 | 2018 |
| Rheumatoid Arthritis | C0003873 | FAP     | 2191   | Q12884 | fibroblast activation protein alpha       | Enzyme   | 216 | 0.496 | 0.808 | 1.9E-28  | 0.01 |  | 1 | 1 | 0 | 2017 | 2017 |
| Rheumatoid Arthritis | C0003873 | FAT1    | 2195   | Q14517 | FAT atypical cadherin 1                   |          | 178 | 0.508 | 0.808 | 1.2E-12  | 0.01 |  | 1 | 1 | 0 | 2015 | 2015 |
| Rheumatoid Arthritis | C0003873 | UNC5B   | 2199   | Q8IZJ1 | unc-5 netrin receptor B                   | Receptor | 38  | 0.682 | 0.462 | 2.69E-07 | 0.01 |  | 1 | 1 | 0 | 2009 | 2009 |
| Rheumatoid Arthritis | C0003873 | ALDH1A3 | 220    | P47895 | aldehyde dehydrogenase 1 family member A3 | Enzyme   | 83  | 0.578 | 0.654 | 0.1428   | 0.01 |  | 1 | 1 | 0 | 2015 | 2015 |
| Rheumatoid Ar        | C0003873 | DLX7    | 220107 | Q6UYE1 | deleted in lymphocytic leukemia 7         |          | 34  | 0.705 | 0.346 | 0.18452  | 0.01 |  | 1 | 1 | 0 | 1990 | 1990 |

|                      |          |        |      |        |                                                       |                         |     |       |       |       |      |  |   |   |   |      |      |
|----------------------|----------|--------|------|--------|-------------------------------------------------------|-------------------------|-----|-------|-------|-------|------|--|---|---|---|------|------|
| thritis              |          |        |      |        |                                                       |                         |     |       |       |       |      |  |   |   |   |      |      |
| Rheumatoid Arthritis | C0003873 | EFEMP1 | 2202 | Q12805 | EGF containing fibulin extracellular matrix protein 1 | Extracellular structure | 153 | 0.54  | 0.79  | 0.99  | 0.01 |  | 1 | 1 | 0 | 2018 | 2018 |
| Rheumatoid Arthritis | C0003873 | FCGR T | 2217 | P55899 | Fc fragment of IgG receptor and transporter           |                         | 102 | 0.563 | 0.654 | 0.414 | 0.01 |  | 1 | 1 | 0 | 2015 | 2015 |
| Rheumatoid Arthritis | C0003873 | FGD1   | 2245 | P98174 | FYVE, RhoGEF and PH domain containing 1               | Enzyme modulator        | 131 | 0.573 | 0.731 | 0.997 | 0.01 |  | 1 | 1 | 0 | 2017 | 2017 |
| Rheumatoid Arthritis | C0003873 | FGF4   | 2249 | P08620 | fibroblast growth factor 4                            | Signaling               | 86  | 0.588 | 0.577 | 0.140 | 0.01 |  | 1 | 1 | 0 | 1998 | 1998 |
| Rheumatoid Arthritis | C0003873 | FGF7   | 2252 | P21781 | fibroblast growth factor 7                            | Signaling               | 167 | 0.519 | 0.846 | 0.708 | 0.01 |  | 1 | 1 | 0 | 1992 | 1992 |
| Rheumatoid Arthritis | C0003873 | FGF9   | 2254 | P31371 | fibroblast growth factor 9                            | Signaling               | 153 | 0.528 | 0.847 | 0.470 | 0.01 |  | 1 | 1 | 0 | 2018 | 2018 |
| Rheumatoid           | C0003873 | FGFR1  | 2260 | P11362 | fibroblast growth factor                              | Kinase                  | 816 | 0.3   | 0.88  | 0.999 | 0.01 |  | 1 | 1 | 0 | 2003 | 2003 |

|                                                 |                          |               |                       |            |                                                       |                                             |         |                       |                       |                                  |          |  |   |   |   |          |                  |
|-------------------------------------------------|--------------------------|---------------|-----------------------|------------|-------------------------------------------------------|---------------------------------------------|---------|-----------------------|-----------------------|----------------------------------|----------|--|---|---|---|----------|------------------|
| d<br>Ar<br>thr<br>itis                          | 87<br>3                  |               |                       |            | receptor<br>1                                         |                                             |         | 6<br>2                | 8<br>5                | 8<br>4                           |          |  |   |   |   |          |                  |
| Rh<br>eu<br>ma<br>toi<br>d<br>Ar<br>thr<br>itis | C<br>00<br>03<br>87<br>3 | FG<br>FR<br>3 | 2<br>2<br>6<br>1      | P2260<br>7 | fibroblas<br>t growth<br>factor<br>receptor<br>3      | Ki<br>nas<br>e                              | 65<br>4 | 0<br>.<br>3<br>9<br>1 | 0<br>.<br>8<br>4<br>6 | 1.<br>6<br>4<br>E<br>-<br>0<br>5 | 0.<br>01 |  | 1 | 1 | 0 | 20<br>18 | 2<br>0<br>1<br>8 |
| Rh<br>eu<br>ma<br>toi<br>d<br>Ar<br>thr<br>itis | C<br>00<br>03<br>87<br>3 | FH<br>L2      | 2<br>2<br>7<br>4      | Q141<br>92 | four and<br>a half<br>LIM<br>domains<br>2             | Tr<br>ans<br>cri<br>pti<br>on<br>fac<br>tor | 12<br>1 | 0<br>.<br>5<br>5<br>6 | 0<br>.<br>7<br>3<br>1 | 2.<br>8<br>7<br>E<br>-<br>0<br>5 | 0.<br>01 |  | 1 | 1 | 0 | 20<br>15 | 2<br>0<br>1<br>5 |
| Rh<br>eu<br>ma<br>toi<br>d<br>Ar<br>thr<br>itis | C<br>00<br>03<br>87<br>3 | VE<br>GF<br>D | 2<br>2<br>7<br>7      | O439<br>15 | vascular<br>endothel<br>ial<br>growth<br>factor D     | Sig<br>nal<br>ing                           | 13<br>2 | 0<br>.<br>5<br>3<br>8 | 0<br>.<br>7<br>6<br>9 | 2.<br>5<br>E<br>-<br>0<br>5      | 0.<br>01 |  | 1 | 1 | 0 | 20<br>02 | 2<br>0<br>0<br>2 |
| Rh<br>eu<br>ma<br>toi<br>d<br>Ar<br>thr<br>itis | C<br>00<br>03<br>87<br>3 | IK<br>ZF<br>2 | 2<br>2<br>8<br>0<br>7 | Q9U<br>KS7 | IKARO<br>S family<br>zinc<br>finger 2                 | Tr<br>ans<br>cri<br>pti<br>on<br>fac<br>tor | 39      | 0<br>.<br>6<br>5<br>6 | 0<br>.<br>5<br>8<br>1 | 0.<br>9<br>8<br>7<br>3<br>1      | 0.<br>01 |  | 1 | 1 | 0 | 20<br>18 | 2<br>0<br>1<br>8 |
| Rh<br>eu<br>ma<br>toi<br>d<br>Ar<br>thr<br>itis | C<br>00<br>03<br>87<br>3 | NR<br>1I4     | 2<br>2<br>8<br>1<br>7 |            | nuclear<br>receptor<br>subfamily<br>group<br>member 4 | 1<br>I                                      | 3       | 0<br>.<br>8<br>9      | 0<br>.<br>3<br>8<br>5 |                                  | 0.<br>01 |  | 1 | 1 | 0 | 20<br>01 | 2<br>0<br>0<br>1 |
| Rh<br>eu<br>ma<br>toi<br>d<br>Ar<br>thr<br>itis | C<br>00<br>03<br>87<br>3 | PU<br>F60     | 2<br>2<br>8<br>2<br>7 | Q9U<br>HX1 | poly(U)<br>binding<br>splicing factor<br>60           |                                             | 18<br>8 | 0<br>.<br>5<br>3<br>6 | 0<br>.<br>7<br>6<br>9 | 0.<br>9<br>9<br>6<br>7<br>7      | 0.<br>01 |  | 1 | 1 | 0 | 20<br>18 | 2<br>0<br>1<br>8 |
| Rh<br>eu                                        | C<br>00                  | FO<br>XJ3     | 2<br>2                | Q9UP<br>W0 | forkhead box<br>J3                                    |                                             | 5       | 0<br>.                | 0<br>.                | 0.<br>9                          | 0.<br>01 |  | 1 | 1 | 2 | 20<br>13 | 2<br>0           |

|                                                 |                          |                |                       |            |                                                       |                                                            |    |                       |                       |                                  |          |  |   |   |   |          |                  |
|-------------------------------------------------|--------------------------|----------------|-----------------------|------------|-------------------------------------------------------|------------------------------------------------------------|----|-----------------------|-----------------------|----------------------------------|----------|--|---|---|---|----------|------------------|
| ma<br>toi<br>d<br>Ar<br>thr<br>itis             | 03<br>87<br>3            |                | 8<br>8<br>7           |            |                                                       |                                                            |    | 8<br>9                | 1<br>9<br>2           | 9<br>5<br>9<br>8                 |          |  |   |   |   | 1<br>3   |                  |
| Rh<br>eu<br>ma<br>toi<br>d<br>Ar<br>thr<br>itis | C<br>00<br>03<br>87<br>3 | SA<br>CM<br>1L | 2<br>2<br>9<br>0<br>8 | Q9NT<br>J5 | SAC1 like<br>phosphatidyli<br>nositide<br>phosphatase |                                                            | 31 | 0<br>.<br>6<br>8<br>2 | 0<br>.<br>5           | 0.<br>6<br>9<br>5<br>3<br>6      | 0.<br>01 |  | 1 | 1 | 0 | 19<br>89 | 1<br>9<br>8<br>9 |
| Rh<br>eu<br>ma<br>toi<br>d<br>Ar<br>thr<br>itis | C<br>00<br>03<br>87<br>3 | CD<br>93       | 2<br>2<br>9<br>1<br>8 | Q9NP<br>Y3 | CD93<br>molecul<br>e                                  | Ca<br>lci<br>um<br>-<br>bin<br>din<br>g<br>pro<br>tei<br>n | 36 | 0<br>.<br>6<br>6<br>3 | 0<br>.<br>5           | 1.<br>9<br>8<br>E<br>-<br>1<br>0 | 0.<br>01 |  | 1 | 1 | 0 | 19<br>93 | 1<br>9<br>9<br>3 |
| Rh<br>eu<br>ma<br>toi<br>d<br>Ar<br>thr<br>itis | C<br>00<br>03<br>87<br>3 | SN<br>W1       | 2<br>2<br>9<br>3<br>8 | Q135<br>73 | SNW<br>domain<br>containi<br>ng 1                     | Tr<br>ans<br>cri<br>pti<br>on<br>fac<br>tor                | 29 | 0<br>.<br>6<br>8<br>2 | 0<br>.<br>4<br>2<br>3 | 0.<br>9<br>9<br>9<br>6<br>1      | 0.<br>01 |  | 1 | 1 | 0 | 20<br>19 | 2<br>0<br>1<br>9 |
| Rh<br>eu<br>ma<br>toi<br>d<br>Ar<br>thr<br>itis | C<br>00<br>03<br>87<br>3 | P2<br>RX<br>2  | 2<br>2<br>9<br>5<br>3 | Q9UB<br>L9 | purinerg<br>ic<br>receptor<br>P2X 2                   | Ion<br>ch<br>an<br>nel                                     | 99 | 0<br>.<br>5<br>8<br>5 | 0<br>.<br>7<br>6<br>9 | 9.<br>6<br>5<br>E<br>-<br>1<br>3 | 0.<br>01 |  | 1 | 1 | 0 | 20<br>10 | 2<br>0<br>1<br>0 |
| Rh<br>eu<br>ma<br>toi<br>d<br>Ar<br>thr<br>itis | C<br>00<br>03<br>87<br>3 | FO<br>XJ1      | 2<br>3<br>0<br>2      | Q929<br>49 | forkhead box<br>J1                                    |                                                            | 61 | 0<br>.<br>6<br>1<br>9 | 0<br>.<br>5<br>7<br>7 | 0.<br>9<br>6<br>9<br>0<br>1      | 0.<br>01 |  | 1 | 1 | 0 | 20<br>07 | 2<br>0<br>0<br>7 |
| Rh<br>eu<br>ma<br>toi<br>d<br>Ar                | C<br>00<br>03<br>87<br>3 | MA<br>ST<br>3  | 2<br>3<br>0<br>3<br>1 | O603<br>07 | microtu<br>bule<br>associat<br>ed<br>serine/th        | Ki<br>nas<br>e                                             | 10 | 0<br>.<br>9<br>3<br>1 | 0<br>.<br>1<br>5<br>4 | 0.<br>9<br>9<br>9<br>1           | 0.<br>01 |  | 1 | 1 | 0 | 20<br>19 | 2<br>0<br>1<br>9 |

|                                                 |                          |                |                       |            |                                                                                                |                |         |                       |                            |                             |          |  |   |   |   |          |                  |
|-------------------------------------------------|--------------------------|----------------|-----------------------|------------|------------------------------------------------------------------------------------------------|----------------|---------|-----------------------|----------------------------|-----------------------------|----------|--|---|---|---|----------|------------------|
| thr<br>itis                                     |                          |                |                       |            | reonine<br>kinase 3                                                                            |                |         |                       |                            |                             |          |  |   |   |   |          |                  |
| Rh<br>eu<br>ma<br>toi<br>d<br>Ar<br>thr<br>itis | C<br>00<br>03<br>87<br>3 | ZN<br>F29<br>2 | 2<br>3<br>0<br>3<br>6 | O602<br>81 | zinc<br>finger<br>protein<br>292                                                               | En<br>zy<br>me | 53      | 0<br>.<br>6<br>9<br>5 | 0<br>.<br>4<br>2<br>3      | 1                           | 0.<br>01 |  | 1 | 1 | 0 | 20<br>15 | 2<br>0<br>1<br>5 |
| Rh<br>eu<br>ma<br>toi<br>d<br>Ar<br>thr<br>itis | C<br>00<br>03<br>87<br>3 | MO<br>N2       | 2<br>3<br>0<br>4<br>1 | Q7Z3<br>U7 | MON2<br>homolog,<br>regulator of<br>endosome-to-<br>Golgi<br>trafficking                       |                | 15      | 0<br>.<br>7<br>5<br>1 | 0<br>.<br>3<br>0<br>8      | 0.<br>5<br>9<br>3<br>8<br>8 | 0.<br>01 |  | 1 | 1 | 0 | 20<br>14 | 2<br>0<br>1<br>4 |
| Rh<br>eu<br>ma<br>toi<br>d<br>Ar<br>thr<br>itis | C<br>00<br>03<br>87<br>3 | SM<br>G1       | 2<br>3<br>0<br>4<br>9 | Q96Q<br>15 | SMG1<br>nonsens<br>e<br>mediate<br>d mRNA<br>decay<br>associat<br>ed PI3K<br>related<br>kinase | Ki<br>nas<br>e | 90      | 0<br>.<br>5<br>7<br>5 | 0<br>.<br>8<br>0<br>8      | 1                           | 0.<br>01 |  | 1 | 1 | 0 | 20<br>01 | 2<br>0<br>0<br>1 |
| Rh<br>eu<br>ma<br>toi<br>d<br>Ar<br>thr<br>itis | C<br>00<br>03<br>87<br>3 | ZN<br>F42<br>3 | 2<br>3<br>0<br>9<br>0 | Q2M1<br>K9 | zinc finger<br>protein 423                                                                     |                | 97      | 0<br>.<br>5<br>9<br>2 | 0<br>.<br>8<br>0<br>8      | 0.<br>9<br>9<br>9<br>6      | 0.<br>01 |  | 1 | 1 | 0 | 20<br>10 | 2<br>0<br>1<br>0 |
| Rh<br>eu<br>ma<br>toi<br>d<br>Ar<br>thr<br>itis | C<br>00<br>03<br>87<br>3 | TA<br>B2       | 2<br>3<br>1<br>1<br>8 | Q9N<br>YJ8 | TGF-beta<br>activated<br>kinase 1<br>(MAP3K7)<br>binding<br>protein 2                          |                | 72      | 0<br>.<br>6<br>1<br>7 | 0<br>.<br>6<br>5<br>4      | 0.<br>9<br>9<br>9<br>8      | 0.<br>01 |  | 1 | 1 | 1 | 20<br>06 | 2<br>0<br>0<br>6 |
| Rh<br>eu<br>ma<br>toi<br>d<br>Ar<br>thr<br>itis | C<br>00<br>03<br>87<br>3 | CI<br>C        | 2<br>3<br>1<br>5<br>2 | Q96R<br>K0 | capicua<br>transcriptional<br>repressor                                                        |                | 14<br>1 | 0<br>.<br>5<br>2<br>3 | 0<br>.<br>6<br>9<br>2<br>9 | 0.<br>9<br>9<br>9<br>9      | 0.<br>01 |  | 1 | 1 | 0 | 20<br>10 | 2<br>0<br>1<br>0 |
| Rh<br>eu                                        | C<br>00                  | FL<br>NA       | 2<br>3                | P2133<br>3 | filamin<br>A                                                                                   |                | 57<br>1 | 0<br>.<br>.           | 0<br>.<br>.                | 1                           | 0.<br>01 |  | 1 | 1 | 0 | 20<br>17 | 2<br>0           |



|                                                 |                          |                |                       |            |                                                                |                                             |         |                       |                       |                                  |          |  |   |   |   |          |                  |
|-------------------------------------------------|--------------------------|----------------|-----------------------|------------|----------------------------------------------------------------|---------------------------------------------|---------|-----------------------|-----------------------|----------------------------------|----------|--|---|---|---|----------|------------------|
| ma<br>toi<br>d<br>Ar<br>thr<br>itis             | 03<br>87<br>3            |                | 1<br>6                |            |                                                                |                                             |         | 4<br>1<br>9           | 8<br>4<br>6           |                                  |          |  |   |   |   |          | 1<br>7           |
| Rh<br>eu<br>ma<br>toi<br>d<br>Ar<br>thr<br>itis | C<br>00<br>03<br>87<br>3 | PH<br>LD<br>B1 | 2<br>3<br>1<br>8<br>7 | Q86U<br>U1 | pleckstrin<br>homology like<br>domain family<br>B member 1     |                                             | 20      | 0<br>.<br>7<br>2<br>2 | 0<br>.<br>4<br>2<br>3 | 0.<br>1<br>0<br>6<br>6<br>7      | 0.<br>01 |  | 0 | 1 | 0 | 20<br>17 | 2<br>0<br>1<br>7 |
| Rh<br>eu<br>ma<br>toi<br>d<br>Ar<br>thr<br>itis | C<br>00<br>03<br>87<br>3 | FL<br>T3       | 2<br>3<br>2<br>2      | P3688<br>8 | fms<br>related<br>receptor<br>tyrosine<br>kinase 3             | Ki<br>nas<br>e                              | 27<br>0 | 0<br>.<br>4<br>6<br>2 | 0<br>.<br>6<br>5<br>4 | 0.<br>6<br>0<br>7<br>7           | 0.<br>01 |  | 1 | 1 | 0 | 20<br>19 | 2<br>0<br>1<br>9 |
| Rh<br>eu<br>ma<br>toi<br>d<br>Ar<br>thr<br>itis | C<br>00<br>03<br>87<br>3 | AR<br>C        | 2<br>3<br>2<br>3<br>7 | Q7LC<br>44 | activity<br>regulated<br>cytoskeleton<br>associated<br>protein |                                             | 10<br>1 | 0<br>.<br>5<br>7<br>3 | 0<br>.<br>7<br>6<br>9 | 0.<br>5<br>9<br>4<br>3<br>3      | 0.<br>01 |  | 1 | 1 | 0 | 19<br>97 | 1<br>9<br>9<br>7 |
| Rh<br>eu<br>ma<br>toi<br>d<br>Ar<br>thr<br>itis | C<br>00<br>03<br>87<br>3 | SA<br>TB<br>2  | 2<br>3<br>3<br>1<br>4 | Q9UP<br>W6 | SATB<br>homeob<br>ox 2                                         | Tr<br>ans<br>cri<br>pti<br>on<br>fac<br>tor | 23<br>3 | 0<br>.<br>5<br>0<br>3 | 0<br>.<br>7<br>6<br>9 | 0.<br>9<br>9<br>9<br>9           | 0.<br>01 |  | 1 | 1 | 0 | 20<br>13 | 2<br>0<br>1<br>3 |
| Rh<br>eu<br>ma<br>toi<br>d<br>Ar<br>thr<br>itis | C<br>00<br>03<br>87<br>3 | SY<br>NM       | 2<br>3<br>3<br>3<br>6 | O150<br>61 | synemin                                                        |                                             | 93      | 0<br>.<br>5<br>7<br>5 | 0<br>.<br>7<br>3<br>1 | 3.<br>0<br>3<br>E<br>-<br>2<br>4 | 0.<br>01 |  | 1 | 1 | 0 | 20<br>19 | 2<br>0<br>1<br>9 |
| Rh<br>eu<br>ma<br>toi<br>d<br>Ar<br>thr<br>itis | C<br>00<br>03<br>87<br>3 | CO<br>TL<br>1  | 2<br>3<br>4<br>0<br>6 | Q140<br>19 | coactosi<br>n like F-<br>actin<br>binding<br>protein 1         | Ce<br>llul<br>ar<br>str<br>uct<br>ure       | 62      | 0<br>.<br>6<br>1<br>5 | 0<br>.<br>5<br>3<br>8 | 0.<br>0<br>3<br>9<br>0<br>7<br>7 | 0.<br>01 |  | 1 | 1 | 0 | 20<br>09 | 2<br>0<br>0<br>9 |

|                      |          |         |       |        |                                           |                            |     |       |        |          |      |  |   |   |   |      |      |
|----------------------|----------|---------|-------|--------|-------------------------------------------|----------------------------|-----|-------|--------|----------|------|--|---|---|---|------|------|
| Rheumatoid Arthritis | C0003873 | HARS2   | 23438 | P49590 | histidyl-tRNA synthetase 2, mitochondrial | Enzyme                     | 25  | 0.705 | 0.462  | 2.79E-05 | 0.01 |  | 1 | 1 | 0 | 2006 | 2006 |
| Rheumatoid Arthritis | C0003873 | FOLR1   | 23448 | P15328 | folate receptor alpha                     |                            | 174 | 0.522 | 0.885  | 0.12642  | 0.01 |  | 1 | 1 | 0 | 2017 | 2017 |
| Rheumatoid Arthritis | C0003873 | CABI N1 | 23523 | Q9Y6J0 | calcineurin binding protein 1             | Enzyme modulator           | 136 | 0.536 | 0.846  | 3.28E-17 | 0.01 |  | 1 | 1 | 0 | 2010 | 2010 |
| Rheumatoid Arthritis | C0003873 | SNAPIN  | 23557 | O95295 | SNAP associated protein                   |                            | 4   | 0.931 | 0.1912 | 0.001533 | 0.01 |  | 1 | 1 | 0 | 2012 | 2012 |
| Rheumatoid Arthritis | C0003873 | DDAH2   | 23564 | O95865 | dimethylarginine dimethylaminohydrolase 2 | Enzyme                     | 36  | 0.67  | 0.538  | 0.001373 | 0.01 |  | 0 | 1 | 0 | 2014 | 2014 |
| Rheumatoid Arthritis | C0003873 | LPAR3   | 23566 | Q9UBY5 | lysophosphatidic acid receptor 3          | G-protein coupled receptor | 194 | 0.599 | 0.293  | 0.67935  | 0.01 |  | 1 | 1 | 0 | 2008 | 2008 |
| Rheumatoid           | C0003    | FP R1   | 2357  | P21462 | formyl peptide receptor 1                 | G-protein                  | 93  | 0.5   | 0.7    |          | 0.01 |  | 1 | 1 | 0 | 2008 | 2008 |

|                                                 |                          |                     |                       |            |                                                          |                                     |         |                       |                       |                                  |          |  |   |   |   |          |                  |
|-------------------------------------------------|--------------------------|---------------------|-----------------------|------------|----------------------------------------------------------|-------------------------------------|---------|-----------------------|-----------------------|----------------------------------|----------|--|---|---|---|----------|------------------|
| d<br>Ar<br>thr<br>itis                          | 87<br>3                  |                     |                       |            |                                                          | co<br>upl<br>ed<br>rec<br>ept<br>or |         | 7<br>6                | 6<br>9                |                                  |          |  |   |   |   |          |                  |
| Rh<br>eu<br>ma<br>toi<br>d<br>Ar<br>thr<br>itis | C<br>00<br>03<br>87<br>3 | DD<br>AH<br>1       | 2<br>3<br>5<br>7<br>6 | O947<br>60 | dimethyl<br>arginine<br>dimethyl<br>aminohy<br>drolase 1 | En<br>zy<br>me                      | 73      | 0<br>.<br>6<br>0<br>4 | 0<br>.<br>6<br>1<br>5 | 0.<br>0<br>2<br>7<br>9<br>7      | 0.<br>01 |  | 0 | 1 | 0 | 20<br>14 | 2<br>0<br>1<br>4 |
| Rh<br>eu<br>ma<br>toi<br>d<br>Ar<br>thr<br>itis | C<br>00<br>03<br>87<br>3 | FA<br>M2<br>15<br>A | 2<br>3<br>5<br>9<br>1 | Q9Y5<br>M1 | family with<br>sequence<br>similarity 215<br>member A    |                                     | 43      | 0<br>.<br>6<br>5      | 0<br>.<br>5           |                                  | 0.<br>01 |  | 1 | 1 | 0 | 20<br>13 | 2<br>0<br>1<br>3 |
| Rh<br>eu<br>ma<br>toi<br>d<br>Ar<br>thr<br>itis | C<br>00<br>03<br>87<br>3 | AM<br>AC<br>R       | 2<br>3<br>6<br>0<br>0 | Q9U<br>HK6 | alpha-<br>methylacyl-<br>CoA racemase                    |                                     | 17<br>9 | 0<br>.<br>5<br>1      | 0<br>.<br>7<br>6<br>9 | 0.<br>0<br>2<br>3<br>6<br>3      | 0.<br>01 |  | 1 | 1 | 0 | 19<br>98 | 1<br>9<br>9<br>8 |
| Rh<br>eu<br>ma<br>toi<br>d<br>Ar<br>thr<br>itis | C<br>00<br>03<br>87<br>3 | CL<br>EC<br>5A      | 2<br>3<br>6<br>0<br>1 | Q9N<br>Y25 | C-type lectin<br>domain<br>containing 5A                 |                                     | 37      | 0<br>.<br>6<br>6<br>3 | 0<br>.<br>3<br>4<br>6 | 0.<br>1<br>2<br>5<br>6<br>8      | 0.<br>01 |  | 1 | 1 | 0 | 20<br>14 | 2<br>0<br>1<br>4 |
| Rh<br>eu<br>ma<br>toi<br>d<br>Ar<br>thr<br>itis | C<br>00<br>03<br>87<br>3 | CD<br>2A<br>P       | 2<br>3<br>6<br>0<br>7 | Q9Y5<br>K6 | CD2<br>associated<br>protein                             |                                     | 11<br>3 | 0<br>.<br>5<br>5<br>8 | 0<br>.<br>7<br>3<br>1 | 0.<br>2<br>2<br>9<br>8<br>9      | 0.<br>01 |  | 1 | 1 | 0 | 20<br>18 | 2<br>0<br>1<br>8 |
| Rh<br>eu<br>ma<br>toi<br>d<br>Ar<br>thr<br>itis | C<br>00<br>03<br>87<br>3 | HS<br>PB<br>P1      | 2<br>3<br>6<br>4<br>0 | Q9NZ<br>L4 | HSPA<br>(Hsp70)<br>binding<br>protein 1                  |                                     | 14      | 0<br>.<br>8<br>6<br>1 | 0<br>.<br>2<br>6<br>9 | 0.<br>0<br>5<br>7<br>2<br>0<br>8 | 0.<br>01 |  | 1 | 1 | 0 | 20<br>11 | 2<br>0<br>1<br>1 |

|                      |          |         |       |        |                                                |             |     |       |        |          |      |  |   |   |   |      |      |
|----------------------|----------|---------|-------|--------|------------------------------------------------|-------------|-----|-------|--------|----------|------|--|---|---|---|------|------|
| Rheumatoid Arthritis | C0003873 | PP1R15A | 23645 | O75807 | protein phosphatase 1 regulatory subunit 15A   |             | 65  | 0.608 | 0.62   | 2.1E-12  | 0.01 |  | 1 | 1 | 0 | 2016 | 2016 |
| Rheumatoid Arthritis | C0003873 | PLD3    | 23646 | Q8IV08 | phospholipase D family member 3                |             | 29  | 0.7   | 0.462  | 1.75E-05 | 0.01 |  | 1 | 1 | 0 | 2018 | 2018 |
| Rheumatoid Arthritis | C0003873 | BRD1    | 23774 | O95696 | bromodomain containing 1                       |             | 50  | 0.644 | 0.6549 | 0.9949   | 0.01 |  | 1 | 1 | 0 | 2018 | 2018 |
| Rheumatoid Arthritis | C0003873 | ALOX12  | 239   | P18054 | arachidonate 12-lipoxygenase, 12S type         | Enzyme      | 119 | 0.558 | 0.692  | 1.44E-15 | 0.01 |  | 1 | 1 | 0 | 1997 | 1997 |
| Rheumatoid Arthritis | C0003873 | ABCA4   | 24    | P78363 | ATP binding cassette subfamily A member 4      | Transporter | 227 | 0.493 | 0.769  | 5.35E-48 | 0.01 |  | 1 | 1 | 0 | 2014 | 2014 |
| Rheumatoid Arthritis | C0003873 | ALOX5AP | 241   | P20292 | arachidonate 5-lipoxygenase activating protein | Enzyme      | 76  | 0.612 | 0.731  | 0.077    | 0.01 |  | 1 | 1 | 0 | 1995 | 1995 |
| Rheumatoid Ar        | C0003873 | SPESP1  | 24677 | Q6UW49 | sperm equatorial segment protein 1             |             | 25  | 0.711 | 0.538  | 0.3465   | 0.01 |  | 1 | 1 | 0 | 2016 | 2016 |

|                                                 |                          |                |                            |            |                                                                    |                                             |         |                       |                       |                                  |          |  |   |   |   |          |                  |
|-------------------------------------------------|--------------------------|----------------|----------------------------|------------|--------------------------------------------------------------------|---------------------------------------------|---------|-----------------------|-----------------------|----------------------------------|----------|--|---|---|---|----------|------------------|
| thr<br>itis                                     |                          |                |                            |            |                                                                    |                                             |         |                       |                       |                                  |          |  |   |   |   |          |                  |
| Rh<br>eu<br>ma<br>toi<br>d<br>Ar<br>thr<br>itis | C<br>00<br>03<br>87<br>3 | FT<br>L        | 2<br>5<br>1<br>2           | P0279<br>2 | ferritin<br>light<br>chain                                         | Sto<br>rag<br>e                             | 13<br>5 | 0<br>.<br>5<br>5<br>9 | 0<br>.<br>6<br>9<br>2 | 1.<br>6<br>6<br>E<br>-<br>0<br>9 | 0.<br>01 |  | 1 | 1 | 0 | 19<br>97 | 1<br>9<br>9<br>7 |
| Rh<br>eu<br>ma<br>toi<br>d<br>Ar<br>thr<br>itis | C<br>00<br>03<br>87<br>3 | FU<br>T4       | 2<br>5<br>2<br>6           | P2208<br>3 | fucosyltr<br>ansferas<br>e 4                                       | En<br>zy<br>me                              | 16<br>8 | 0<br>.<br>5<br>0<br>5 | 0<br>.<br>7<br>3<br>1 | 7.<br>7<br>3<br>E<br>-<br>0<br>6 | 0.<br>01 |  | 1 | 1 | 0 | 20<br>16 | 2<br>0<br>1<br>6 |
| Rh<br>eu<br>ma<br>toi<br>d<br>Ar<br>thr<br>itis | C<br>00<br>03<br>87<br>3 | ZB<br>TB<br>38 | 2<br>5<br>3<br>4<br>6<br>1 | Q8N<br>AP3 | zinc<br>finger<br>and BTB<br>domain<br>containi<br>ng 38           | Tr<br>ans<br>cri<br>pti<br>on<br>fac<br>tor | 60      | 0<br>.<br>6<br>6<br>3 | 0<br>.<br>6<br>1<br>5 | 0.<br>9<br>9<br>4<br>9           | 0.<br>01 |  | 1 | 1 | 0 | 20<br>18 | 2<br>0<br>1<br>8 |
| Rh<br>eu<br>ma<br>toi<br>d<br>Ar<br>thr<br>itis | C<br>00<br>03<br>87<br>3 | EB<br>F3       | 2<br>5<br>3<br>7<br>3<br>8 | Q9H4<br>W6 | EBF<br>transcription<br>factor 3                                   |                                             | 12<br>4 | 0<br>.<br>5<br>9<br>5 | 0<br>.<br>7<br>3<br>1 | 0.<br>9<br>9<br>9<br>3           | 0.<br>01 |  | 1 | 1 | 0 | 20<br>13 | 2<br>0<br>1<br>3 |
| Rh<br>eu<br>ma<br>toi<br>d<br>Ar<br>thr<br>itis | C<br>00<br>03<br>87<br>3 | TA<br>C4       | 2<br>5<br>5<br>0<br>6<br>1 | Q86U<br>U9 | tachykinin<br>precursor 4                                          |                                             | 24      | 0<br>.<br>7<br>1<br>1 | 0<br>.<br>4<br>6<br>2 | 3.<br>6<br>1<br>E<br>-<br>0<br>5 | 0.<br>01 |  | 1 | 1 | 0 | 20<br>19 | 2<br>0<br>1<br>9 |
| Rh<br>eu<br>ma<br>toi<br>d<br>Ar<br>thr<br>itis | C<br>00<br>03<br>87<br>3 | PC<br>SK<br>9  | 2<br>5<br>5<br>7<br>3<br>8 | Q8NB<br>P7 | proprote<br>in<br>converta<br>se<br>subtilisi<br>n/kexin<br>type 9 | En<br>zy<br>me                              | 25<br>7 | 0<br>.<br>4<br>8<br>2 | 0<br>.<br>8<br>0<br>8 | 2.<br>7<br>1<br>E<br>-<br>1<br>7 | 0.<br>01 |  | 1 | 1 | 0 | 20<br>19 | 2<br>0<br>1<br>9 |
| Rh<br>eu<br>ma<br>toi                           | C<br>00<br>03            | CIZ<br>1       | 2<br>5<br>7                | Q9UL<br>V3 | CDKN1A<br>interacting<br>zinc finger<br>protein 1                  |                                             | 80      | 0<br>.<br>6           | 0<br>.<br>5           | 0.<br>0<br>6<br>3                | 0.<br>01 |  | 1 | 1 | 0 | 20<br>16 | 2<br>0<br>1<br>6 |

|                                                 |                          |               |                            |            |                                                     |                                                |         |                       |                            |                             |          |  |   |   |   |          |                  |
|-------------------------------------------------|--------------------------|---------------|----------------------------|------------|-----------------------------------------------------|------------------------------------------------|---------|-----------------------|----------------------------|-----------------------------|----------|--|---|---|---|----------|------------------|
| d<br>Ar<br>thr<br>itis                          | 87<br>3                  |               | 9<br>2                     |            |                                                     |                                                |         | 1<br>7                |                            | 1<br>7<br>2                 |          |  |   |   |   |          |                  |
| Rh<br>eu<br>ma<br>toi<br>d<br>Ar<br>thr<br>itis | C<br>00<br>03<br>87<br>3 | QP<br>CT      | 2<br>5<br>7<br>9<br>7      | Q167<br>69 | glutamin<br>yl-<br>peptide<br>cyclotra<br>nsferase  | En<br>zy<br>me                                 | 94      | 0<br>.<br>5<br>6<br>8 | 0<br>.<br>7<br>3<br>1      | 1.<br>2<br>E<br>-<br>1<br>5 | 0.<br>01 |  | 1 | 1 | 0 | 20<br>19 | 2<br>0<br>1<br>9 |
| Rh<br>eu<br>ma<br>toi<br>d<br>Ar<br>thr<br>itis | C<br>00<br>03<br>87<br>3 | PR<br>DX<br>5 | 2<br>5<br>8<br>2<br>4      | P3004<br>4 | peroxiredoxin<br>5                                  |                                                | 15<br>3 | 0<br>.<br>5<br>2<br>2 | 0<br>.<br>8<br>0<br>8      | 0.<br>0<br>0<br>1<br>7<br>9 | 0.<br>01 |  | 1 | 1 | 0 | 20<br>07 | 2<br>0<br>0<br>7 |
| Rh<br>eu<br>ma<br>toi<br>d<br>Ar<br>thr<br>itis | C<br>00<br>03<br>87<br>3 | PA<br>RT<br>1 | 2<br>5<br>8<br>5<br>9      |            | prostate<br>androgen-<br>regulated<br>transcript 1  |                                                | 25<br>0 | 0<br>.<br>4<br>8<br>3 | 0<br>.<br>8<br>8<br>5      |                             | 0.<br>01 |  | 1 | 1 | 0 | 20<br>17 | 2<br>0<br>1<br>7 |
| Rh<br>eu<br>ma<br>toi<br>d<br>Ar<br>thr<br>itis | C<br>00<br>03<br>87<br>3 | PO<br>T1      | 2<br>5<br>9<br>1<br>3      | Q9N<br>UX5 | protectio<br>n of<br>telomere<br>s 1                | Nu<br>cle<br>ic<br>aci<br>d<br>bin<br>din<br>g | 10<br>7 | 0<br>.<br>5<br>6      | 0<br>.<br>7<br>3<br>1      | 0.<br>8<br>5<br>3<br>4<br>3 | 0.<br>01 |  | 1 | 1 | 0 | 20<br>12 | 2<br>0<br>1<br>2 |
| Rh<br>eu<br>ma<br>toi<br>d<br>Ar<br>thr<br>itis | C<br>00<br>03<br>87<br>3 | NC<br>R3      | 2<br>5<br>9<br>1<br>9<br>7 | O149<br>31 | natural<br>cytotoxicity<br>triggering<br>receptor 3 |                                                | 53      | 0<br>.<br>6<br>3<br>8 | 0<br>.<br>7<br>6<br>9      | 0.<br>0<br>0<br>3<br>6<br>8 | 0.<br>01 |  | 1 | 1 | 1 | 20<br>16 | 2<br>0<br>1<br>6 |
| Rh<br>eu<br>ma<br>toi<br>d<br>Ar<br>thr<br>itis | C<br>00<br>03<br>87<br>3 | IL4<br>I1     | 2<br>5<br>9<br>3<br>0<br>7 | Q96R<br>Q9 | interleukin 4<br>induced 1                          |                                                | 36      | 0<br>.<br>6<br>8<br>6 | 0<br>.<br>5<br>3<br>9<br>6 | 0.<br>0<br>0<br>3<br>9<br>6 | 0.<br>01 |  | 1 | 1 | 0 | 20<br>07 | 2<br>0<br>0<br>7 |
| Rh<br>eu                                        | C<br>00                  | IBT<br>K      | 2<br>5                     | Q9P2<br>D0 | inhibitor of<br>Bruton                              |                                                | 33      | 0<br>.                | 0<br>.                     | 0.<br>0                     | 0.<br>01 |  | 1 | 1 | 0 | 20<br>19 | 2<br>0           |

|                                                 |                          |               |                            |            |                                                                                 |                      |    |                       |                            |                                  |          |  |   |   |   |          |                  |
|-------------------------------------------------|--------------------------|---------------|----------------------------|------------|---------------------------------------------------------------------------------|----------------------|----|-----------------------|----------------------------|----------------------------------|----------|--|---|---|---|----------|------------------|
| ma<br>toi<br>d<br>Ar<br>thr<br>itis             | 03<br>87<br>3            |               | 9<br>9<br>8                |            | tyrosine<br>kinase                                                              |                      |    | 6<br>7<br>8           | 5<br>3<br>8                | 0<br>2<br>1<br>4                 |          |  |   |   |   | 1<br>9   |                  |
| Rh<br>eu<br>ma<br>toi<br>d<br>Ar<br>thr<br>itis | C<br>00<br>03<br>87<br>3 | LRI<br>G1     | 2<br>6<br>0<br>1<br>8      | Q96J<br>A1 | leucine<br>rich<br>repeats<br>and<br>immuno<br>globulin<br>like<br>domains<br>1 | Re<br>ce<br>pto<br>r | 83 | 0<br>.<br>6<br>0<br>1 | 0<br>.<br>5<br>3<br>8      | 0.<br>0<br>3<br>5<br>0<br>3<br>1 | 0.<br>01 |  | 1 | 1 | 0 | 20<br>17 | 2<br>0<br>1<br>7 |
| Rh<br>eu<br>ma<br>toi<br>d<br>Ar<br>thr<br>itis | C<br>00<br>03<br>87<br>3 | PY<br>DC<br>1 | 2<br>6<br>0<br>4<br>3<br>4 | Q8W<br>XC3 | pyrin domain<br>containing 1                                                    |                      | 13 | 0<br>.<br>8<br>0<br>5 | 0<br>.<br>1<br>9<br>2      |                                  | 0.<br>01 |  | 1 | 1 | 0 | 20<br>15 | 2<br>0<br>1<br>5 |
| Rh<br>eu<br>ma<br>toi<br>d<br>Ar<br>thr<br>itis | C<br>00<br>03<br>87<br>3 | LRI<br>T1     | 2<br>6<br>1<br>0<br>3      | Q9P2<br>V4 | leucine rich<br>repeat, Ig-like<br>and<br>transmembran<br>e domains 1           |                      | 53 | 0<br>.<br>6<br>4<br>1 | 0<br>.<br>6<br>1<br>5      | 4.<br>5<br>9<br>E<br>-<br>1<br>5 | 0.<br>01 |  | 1 | 1 | 0 | 20<br>02 | 2<br>0<br>0<br>2 |
| Rh<br>eu<br>ma<br>toi<br>d<br>Ar<br>thr<br>itis | C<br>00<br>03<br>87<br>3 | KIF<br>BP     | 2<br>6<br>1<br>2<br>8      | Q96E<br>K5 | kinesin family<br>binding<br>protein                                            |                      | 83 | 0<br>.<br>6<br>1<br>5 | 0<br>.<br>7<br>3<br>1      | 0.<br>0<br>7<br>5<br>6<br>8<br>2 | 0.<br>01 |  | 1 | 1 | 0 | 20<br>19 | 2<br>0<br>1<br>9 |
| Rh<br>eu<br>ma<br>toi<br>d<br>Ar<br>thr<br>itis | C<br>00<br>03<br>87<br>3 | GA<br>RS<br>1 | 2<br>6<br>1<br>7           | P4125<br>0 | glycyl-<br>tRNA<br>synthetase 1                                                 | En<br>zy<br>me       | 73 | 0<br>.<br>6<br>2<br>3 | 0<br>.<br>5<br>0<br>6<br>5 | 0.<br>3<br>0<br>6<br>5           | 0.<br>01 |  | 1 | 1 | 0 | 20<br>18 | 2<br>0<br>1<br>8 |
| Rh<br>eu<br>ma<br>toi<br>d<br>Ar                | C<br>00<br>03<br>87<br>3 | AM<br>D1      | 2<br>6<br>2                | P1770<br>7 | adenosyl<br>methionine<br>decarboxylase 1                                       | En<br>zy<br>me       | 84 | 0<br>.<br>5<br>9<br>3 | 0<br>.<br>5<br>7<br>7      | 0.<br>9<br>8<br>2<br>2<br>7      | 0.<br>01 |  | 1 | 1 | 0 | 20<br>19 | 2<br>0<br>1<br>9 |

|                                                 |                          |                |                       |            |                                                       |                      |         |                       |                       |                                  |          |  |   |   |   |          |                  |
|-------------------------------------------------|--------------------------|----------------|-----------------------|------------|-------------------------------------------------------|----------------------|---------|-----------------------|-----------------------|----------------------------------|----------|--|---|---|---|----------|------------------|
| thr<br>itis                                     |                          |                |                       |            |                                                       |                      |         |                       |                       |                                  |          |  |   |   |   |          |                  |
| Rh<br>eu<br>ma<br>toi<br>d<br>Ar<br>thr<br>itis | C<br>00<br>03<br>87<br>3 | GA<br>TA<br>1  | 2<br>6<br>2<br>3      | P1597<br>6 | GATA<br>binding<br>protein 1                          |                      | 26<br>4 | 0<br>.<br>4<br>8<br>3 | 0<br>.<br>8<br>0<br>8 | 0.<br>9<br>4<br>7<br>9<br>8      | 0.<br>01 |  | 1 | 1 | 0 | 20<br>18 | 2<br>0<br>1<br>8 |
| Rh<br>eu<br>ma<br>toi<br>d<br>Ar<br>thr<br>itis | C<br>00<br>03<br>87<br>3 | FB<br>XO<br>2  | 2<br>6<br>2<br>3<br>2 | Q9U<br>K22 | F-box protein<br>2                                    |                      | 11      | 0<br>.<br>8<br>0<br>5 | 0<br>.<br>3<br>4<br>6 | 0.<br>0<br>0<br>2<br>1<br>5      | 0.<br>01 |  | 1 | 1 | 0 | 20<br>13 | 2<br>0<br>1<br>3 |
| Rh<br>eu<br>ma<br>toi<br>d<br>Ar<br>thr<br>itis | C<br>00<br>03<br>87<br>3 | GA<br>TA<br>2  | 2<br>6<br>2<br>4      | P2376<br>9 | GATA<br>binding<br>protein 2                          |                      | 22<br>9 | 0<br>.<br>4<br>9<br>6 | 0<br>.<br>6<br>5<br>4 | 0.<br>9<br>7<br>9<br>2<br>7      | 0.<br>01 |  | 1 | 1 | 0 | 20<br>19 | 2<br>0<br>1<br>9 |
| Rh<br>eu<br>ma<br>toi<br>d<br>Ar<br>thr<br>itis | C<br>00<br>03<br>87<br>3 | CL<br>EC<br>4E | 2<br>6<br>2<br>5<br>3 | Q9UL<br>Y5 | C-type<br>lectin<br>domain<br>family 4<br>member<br>E | Re<br>ce<br>pto<br>r | 35      | 0<br>.<br>6<br>9<br>5 | 0<br>.<br>5           | 1.<br>1<br>4<br>E<br>-<br>0<br>5 | 0.<br>01 |  | 0 | 1 | 1 | 20<br>12 | 2<br>0<br>1<br>2 |
| Rh<br>eu<br>ma<br>toi<br>d<br>Ar<br>thr<br>itis | C<br>00<br>03<br>87<br>3 | GA<br>TA<br>4  | 2<br>6<br>2<br>6      | P4369<br>4 | GATA<br>binding<br>protein 4                          |                      | 33<br>6 | 0<br>.<br>4<br>5<br>8 | 0<br>.<br>8<br>4<br>6 | 0.<br>4<br>3<br>0<br>8           | 0.<br>01 |  | 1 | 1 | 0 | 20<br>18 | 2<br>0<br>1<br>8 |
| Rh<br>eu<br>ma<br>toi<br>d<br>Ar<br>thr<br>itis | C<br>00<br>03<br>87<br>3 | FG<br>F21      | 2<br>6<br>2<br>9<br>1 | Q9NS<br>A1 | fibroblas<br>t growth<br>factor 21                    | Sig<br>nal<br>ing    | 23<br>6 | 0<br>.<br>4<br>8<br>5 | 0<br>.<br>7<br>6<br>9 | 0.<br>0<br>2<br>9<br>4<br>3<br>9 | 0.<br>01 |  | 1 | 1 | 0 | 20<br>17 | 2<br>0<br>1<br>7 |
| Rh<br>eu<br>ma<br>toi                           | C<br>00<br>03            | AM<br>D1<br>P2 | 2<br>6<br>3           |            | adenosylmethi<br>none<br>decarboxylase                |                      | 71      | 0<br>.<br>6           | 0<br>.<br>5           |                                  | 0.<br>01 |  | 1 | 1 | 0 | 20<br>19 | 2<br>0<br>1<br>9 |



|                                                 |                          |                     |                       |            |                                                   |                         |                       |                       |                                  |                                  |          |   |   |   |          |                  |                  |
|-------------------------------------------------|--------------------------|---------------------|-----------------------|------------|---------------------------------------------------|-------------------------|-----------------------|-----------------------|----------------------------------|----------------------------------|----------|---|---|---|----------|------------------|------------------|
| d<br>Ar<br>thr<br>itis                          | 87<br>3                  |                     |                       |            | 1 pseudogene<br>2                                 |                         | 0<br>8                | 3<br>8                |                                  |                                  |          |   |   |   |          |                  |                  |
| Rh<br>eu<br>ma<br>toi<br>d<br>Ar<br>thr<br>itis | C<br>00<br>03<br>87<br>3 | GC<br>HF<br>R       | 2<br>6<br>4<br>4      | P3004<br>7 | GTP<br>cyclohydrolas<br>e I feedback<br>regulator | 89                      | 0<br>.<br>5<br>7<br>9 | 0<br>.<br>8<br>0<br>8 | 0.<br>0<br>4<br>8<br>2<br>5<br>1 | 0.<br>01                         |          | 1 | 1 | 0 | 20<br>15 | 2<br>0<br>1<br>5 |                  |
| Rh<br>eu<br>ma<br>toi<br>d<br>Ar<br>thr<br>itis | C<br>00<br>03<br>87<br>3 | GC<br>K             | 2<br>6<br>4<br>5      | P3555<br>7 | glucokin<br>ase                                   | Ki<br>nas<br>e          | 21<br>0               | 0<br>.<br>5<br>2<br>3 | 0<br>.<br>8<br>0<br>8            | 0.<br>6<br>3<br>4<br>6<br>4      | 0.<br>01 |   | 1 | 1 | 0        | 20<br>13         | 2<br>0<br>1<br>3 |
| Rh<br>eu<br>ma<br>toi<br>d<br>Ar<br>thr<br>itis | C<br>00<br>03<br>87<br>3 | KA<br>T2<br>A       | 2<br>6<br>4<br>8      | Q928<br>30 | lysine<br>acetyltransfera<br>se 2A                |                         | 66                    | 0<br>.<br>6<br>1      | 0<br>.<br>7<br>3<br>1            | 0.<br>5<br>7<br>3<br>3<br>1      | 0.<br>01 |   | 1 | 1 | 0        | 20<br>17         | 2<br>0<br>1<br>7 |
| Rh<br>eu<br>ma<br>toi<br>d<br>Ar<br>thr<br>itis | C<br>00<br>03<br>87<br>3 | SL<br>C1<br>7A<br>5 | 2<br>6<br>5<br>0<br>3 | Q9NR<br>A2 | solute<br>carrier<br>family<br>17<br>member<br>5  | Tr<br>ans<br>por<br>ter | 25<br>2               | 0<br>.<br>4<br>9<br>1 | 0<br>.<br>8<br>0<br>8            | 6.<br>8<br>5<br>E<br>-<br>1<br>0 | 0.<br>01 |   | 1 | 1 | 0        | 20<br>19         | 2<br>0<br>1<br>9 |
| Rh<br>eu<br>ma<br>toi<br>d<br>Ar<br>thr<br>itis | C<br>00<br>03<br>87<br>3 | GC<br>Y             | 2<br>6<br>5<br>6      |            | growth<br>control, Y<br>chromosome<br>influenced  |                         | 44                    | 0<br>.<br>6<br>3<br>1 | 0<br>.<br>6<br>1<br>5            |                                  | 0.<br>01 |   | 1 | 1 | 0        | 20<br>17         | 2<br>0<br>1<br>7 |
| Rh<br>eu<br>ma<br>toi<br>d<br>Ar<br>thr<br>itis | C<br>00<br>03<br>87<br>3 | GD<br>F2            | 2<br>6<br>5<br>8      | Q9U<br>K05 | growth<br>different<br>iation<br>factor 2         | Sig<br>nal<br>ing       | 15<br>2               | 0<br>.<br>5<br>2<br>9 | 0<br>.<br>7<br>3<br>1            | 0.<br>0<br>2<br>4<br>6<br>6      | 0.<br>01 |   | 1 | 1 | 0        | 20<br>19         | 2<br>0<br>1<br>9 |

|                      |          |         |       |        |                                                  |                            |     |       |        |         |      |  |   |   |   |      |      |
|----------------------|----------|---------|-------|--------|--------------------------------------------------|----------------------------|-----|-------|--------|---------|------|--|---|---|---|------|------|
| Rheumatoid Arthritis | C0003873 | GREM1   | 26585 | O60565 | gremlin 1, DAN family BMP antagonist             |                            | 179 | 0.588 | 0.8836 | 0.47436 | 0.01 |  | 1 | 1 | 0 | 2016 | 2016 |
| Rheumatoid Arthritis | C0003873 | AMH     | 2688  | P03971 | anti-Mullerian hormone                           |                            | 242 | 0.476 | 0.846  | 3.4E-12 | 0.01 |  | 1 | 1 | 0 | 2019 | 2019 |
| Rheumatoid Arthritis | C0003873 | B4GALT1 | 2683  | P15291 | beta-1,4-galactosyltransferase 1                 | Enzyme                     | 45  | 0.674 | 0.538  | 0.03435 | 0.01 |  | 1 | 1 | 0 | 2017 | 2017 |
| Rheumatoid Arthritis | C0003873 | RNU1-1  | 26871 |        | RNA, U1 small nuclear 1                          |                            | 66  | 0.68  | 0.731  |         | 0.01 |  | 0 | 1 | 0 | 2006 | 2006 |
| Rheumatoid Arthritis | C0003873 | GHGR    | 2693  | Q92847 | growth hormone secretagogue receptor             | G-protein coupled receptor | 171 | 0.588 | 0.769  | 0.06583 | 0.01 |  | 0 | 1 | 0 | 2010 | 2010 |
| Rheumatoid Arthritis | C0003873 | SMR3A   | 26952 | Q99954 | submaxillary gland androgen regulated protein 3A |                            | 19  | 0.751 | 0.538  | 0.39147 | 0.01 |  | 1 | 1 | 0 | 2017 | 2017 |
| Rheumatoid           | C0003    | GJA1    | 2697  | P17302 | gap junction protein alpha 1                     | Cell-cell                  | 662 | 0.3   | 0.855  | 0.155   | 0.01 |  | 1 | 1 | 0 | 2020 | 2020 |

|                                                 |                          |                 |                       |            |                                                        |                      |         |                       |                       |                                  |          |  |   |   |   |          |                  |
|-------------------------------------------------|--------------------------|-----------------|-----------------------|------------|--------------------------------------------------------|----------------------|---------|-----------------------|-----------------------|----------------------------------|----------|--|---|---|---|----------|------------------|
| d<br>Ar<br>thr<br>itis                          | 87<br>3                  |                 |                       |            |                                                        | jun<br>cti<br>on     |         | 9<br>3                | 8<br>5                | 2<br>3                           |          |  |   |   |   |          |                  |
| Rh<br>eu<br>ma<br>toi<br>d<br>Ar<br>thr<br>itis | C<br>00<br>03<br>87<br>3 | AM<br>PD<br>1   | 2<br>7<br>0           | P2310<br>9 | adenosin<br>e<br>monoph<br>osphate<br>deamina<br>se 1  | En<br>zy<br>me       | 10<br>6 | 0<br>.<br>5<br>7<br>3 | 0<br>.<br>6<br>9<br>2 | 1.<br>9<br>1<br>E<br>-<br>2<br>1 | 0.<br>01 |  | 1 | 1 | 1 | 20<br>06 | 2<br>0<br>0<br>6 |
| Rh<br>eu<br>ma<br>toi<br>d<br>Ar<br>thr<br>itis | C<br>00<br>03<br>87<br>3 | SIG<br>LE<br>C7 | 2<br>7<br>0<br>3<br>6 | Q9Y2<br>86 | sialic<br>acid<br>binding<br>Ig like<br>lectin 7       | Re<br>ce<br>pto<br>r | 13<br>7 | 0<br>.<br>5<br>3<br>5 | 0<br>.<br>8<br>4<br>6 | 2.<br>3<br>9<br>E<br>-<br>0<br>7 | 0.<br>01 |  | 1 | 1 | 0 | 19<br>92 | 1<br>9<br>9<br>2 |
| Rh<br>eu<br>ma<br>toi<br>d<br>Ar<br>thr<br>itis | C<br>00<br>03<br>87<br>3 | LA<br>T         | 2<br>7<br>0<br>4<br>0 | O435<br>61 | linker for<br>activation of T<br>cells                 |                      | 12<br>4 | 0<br>.<br>5<br>4<br>8 | 0<br>.<br>7<br>3<br>1 | 0.<br>0<br>0<br>9<br>2<br>3<br>8 | 0.<br>01 |  | 1 | 1 | 0 | 20<br>18 | 2<br>0<br>1<br>8 |
| Rh<br>eu<br>ma<br>toi<br>d<br>Ar<br>thr<br>itis | C<br>00<br>03<br>87<br>3 | PE<br>LP<br>1   | 2<br>7<br>0<br>4<br>3 | Q8IZ<br>L8 | proline,<br>glutamate and<br>leucine rich<br>protein 1 |                      | 64      | 0<br>.<br>6<br>1<br>2 | 0<br>.<br>5<br>7<br>7 | 0.<br>9<br>9<br>9<br>8           | 0.<br>01 |  | 1 | 1 | 0 | 20<br>03 | 2<br>0<br>0<br>3 |
| Rh<br>eu<br>ma<br>toi<br>d<br>Ar<br>thr<br>itis | C<br>00<br>03<br>87<br>3 | DK<br>K2        | 2<br>7<br>1<br>2<br>3 | Q9UB<br>U2 | dickkopf<br>WNT<br>signaling<br>pathway<br>inhibitor 2 |                      | 74      | 0<br>.<br>5<br>9<br>9 | 0<br>.<br>6<br>9<br>2 | 0.<br>7<br>5<br>3<br>1<br>8      | 0.<br>01 |  | 1 | 1 | 0 | 20<br>14 | 2<br>0<br>1<br>4 |
| Rh<br>eu<br>ma<br>toi<br>d<br>Ar<br>thr<br>itis | C<br>00<br>03<br>87<br>3 | IL3<br>6B       | 2<br>7<br>1<br>7<br>7 | Q9NZ<br>H7 | interleukin 36<br>beta                                 |                      | 5       | 0<br>.<br>8<br>6<br>1 | 0<br>.<br>1<br>5<br>4 | 0.<br>0<br>0<br>3<br>2<br>9<br>8 | 0.<br>01 |  | 1 | 1 | 0 | 20<br>06 | 2<br>0<br>0<br>6 |

|                      |          |           |       |        |                                                           |                  |     |       |       |          |      |  |   |   |   |      |      |
|----------------------|----------|-----------|-------|--------|-----------------------------------------------------------|------------------|-----|-------|-------|----------|------|--|---|---|---|------|------|
| Rheumatoid Arthritis | C0003873 | SIGLE C9  | 27180 | Q9Y336 | sialic acid binding Ig like lectin 9                      | Receptor         | 36  | 0.66  | 0.43  | 2.53E-05 | 0.01 |  | 1 | 1 | 0 | 2017 | 2017 |
| Rheumatoid Arthritis | C0003873 | GC LC     | 2729  | P48506 | glutamate-cysteine ligase catalytic subunit               | Enzyme           | 198 | 0.59  | 0.85  | 0.42718  | 0.01 |  | 1 | 1 | 0 | 1999 | 1999 |
| Rheumatoid Arthritis | C0003873 | BM P10    | 27302 | O95393 | bone morphogenetic protein 10                             | Signaling        | 32  | 0.674 | 0.5   | 0.90838  | 0.01 |  | 1 | 1 | 0 | 2019 | 2019 |
| Rheumatoid Arthritis | C0003873 | RA BGEF1  | 27342 | Q9UJ41 | RAB guanine nucleotide exchange factor 1                  | Enzyme modulator | 122 | 0.55  | 0.731 | 0.00631  | 0.01 |  | 1 | 1 | 0 | 2006 | 2006 |
| Rheumatoid Arthritis | C0003873 | GL I1     | 2735  | P08151 | GLI family zinc finger 1                                  |                  | 369 | 0.431 | 0.846 | 7.66E-14 | 0.01 |  | 1 | 1 | 0 | 2014 | 2014 |
| Rheumatoid Arthritis | C0003873 | AP OBEC3C | 27350 | Q9NRW3 | apolipoprotein B mRNA editing enzyme catalytic subunit 3C | Enzyme           | 27  | 0.722 | 0.538 | 0.02691  | 0.01 |  | 1 | 1 | 0 | 2017 | 2017 |
| Rheumatoid Ar        | C0003873 | GN A12    | 2768  | Q03113 | G protein subunit alpha 12                                | Enzyme modulator | 130 | 0.547 | 0.769 | 0.96994  | 0.01 |  | 1 | 1 | 0 | 2014 | 2014 |

|                                                 |                          |               |                            |            |                                                                     |                                         |         |                       |                       |                                  |          |  |   |   |   |          |                  |
|-------------------------------------------------|--------------------------|---------------|----------------------------|------------|---------------------------------------------------------------------|-----------------------------------------|---------|-----------------------|-----------------------|----------------------------------|----------|--|---|---|---|----------|------------------|
| thr<br>itis                                     |                          |               |                            |            |                                                                     | ato<br>r                                |         |                       |                       |                                  |          |  |   |   |   |          |                  |
| Rh<br>eu<br>ma<br>toi<br>d<br>Ar<br>thr<br>itis | C<br>00<br>03<br>87<br>3 | GN<br>AQ      | 2<br>7<br>7<br>6           | P5014<br>8 | G<br>protein<br>subunit<br>alpha q                                  | En<br>zy<br>me<br>mo<br>dul<br>ato<br>r | 21<br>9 | 0<br>.<br>5<br>1<br>6 | 0<br>.<br>8<br>0<br>8 | 0.<br>9<br>8<br>0<br>6<br>9      | 0.<br>01 |  | 0 | 1 | 0 | 20<br>13 | 2<br>0<br>1<br>3 |
| Rh<br>eu<br>ma<br>toi<br>d<br>Ar<br>thr<br>itis | C<br>00<br>03<br>87<br>3 | GN<br>B3      | 2<br>7<br>8<br>4           | P1652<br>0 | G<br>protein<br>subunit<br>beta 3                                   | En<br>zy<br>me                          | 19<br>2 | 0<br>.<br>5<br>1<br>8 | 0<br>.<br>8<br>0<br>8 | 3.<br>3<br>3<br>E<br>-<br>1<br>1 | 0.<br>01 |  | 1 | 1 | 1 | 20<br>09 | 2<br>0<br>0<br>9 |
| Rh<br>eu<br>ma<br>toi<br>d<br>Ar<br>thr<br>itis | C<br>00<br>03<br>87<br>3 | GN<br>S       | 2<br>7<br>9<br>9           | P1558<br>6 | glucosa<br>mine (N-<br>acetyl)-<br>6-<br>sulfatase                  | En<br>zy<br>me                          | 51      | 0<br>.<br>7<br>0<br>5 | 0<br>.<br>5<br>3<br>8 | 0.<br>0<br>0<br>5<br>6<br>4      | 0.<br>01 |  | 1 | 1 | 0 | 20<br>17 | 2<br>0<br>1<br>7 |
| Rh<br>eu<br>ma<br>toi<br>d<br>Ar<br>thr<br>itis | C<br>00<br>03<br>87<br>3 | GP<br>C1      | 2<br>8<br>1<br>7           | P3505<br>2 | glypican 1                                                          |                                         | 96      | 0<br>.<br>5<br>8<br>7 | 0<br>.<br>7<br>3<br>1 | 0.<br>0<br>1<br>5<br>4<br>7      | 0.<br>01 |  | 1 | 1 | 0 | 20<br>05 | 2<br>0<br>0<br>5 |
| Rh<br>eu<br>ma<br>toi<br>d<br>Ar<br>thr<br>itis | C<br>00<br>03<br>87<br>3 | GP<br>LD<br>1 | 2<br>8<br>2<br>2           | P8010<br>8 | glycosylphosp<br>hatidylinositol<br>specific<br>phospholipase<br>D1 |                                         | 44      | 0<br>.<br>6<br>5<br>6 | 0<br>.<br>5<br>7<br>7 | 1.<br>5<br>9<br>E<br>-<br>1<br>5 | 0.<br>01 |  | 1 | 1 | 0 | 20<br>11 | 2<br>0<br>1<br>1 |
| Rh<br>eu<br>ma<br>toi<br>d<br>Ar<br>thr<br>itis | C<br>00<br>03<br>87<br>3 | IFN<br>L2     | 2<br>8<br>2<br>6<br>1<br>6 | Q8IZJ<br>0 | interferon<br>lambda 2                                              |                                         | 38      | 0<br>.<br>6<br>6<br>6 | 0<br>.<br>6<br>1<br>5 | 4.<br>9<br>9<br>E<br>-<br>0<br>8 | 0.<br>01 |  | 1 | 1 | 0 | 20<br>17 | 2<br>0<br>1<br>7 |
| Rh<br>eu<br>ma<br>toi                           | C<br>00<br>03            | GP<br>R3      | 2<br>8<br>2<br>7           | P4608<br>9 | G<br>protein-<br>coupled                                            | G-<br>pro<br>tei<br>n                   | 18      | 0<br>.<br>7           | 0<br>.<br>5           | 0.<br>0<br>0<br>0                | 0.<br>01 |  | 1 | 1 | 0 | 20<br>19 | 2<br>0<br>1<br>9 |

|                                                 |                          |                      |                            |            |                                                           |                                                              |         |                       |                       |                                  |          |  |   |   |   |          |                  |
|-------------------------------------------------|--------------------------|----------------------|----------------------------|------------|-----------------------------------------------------------|--------------------------------------------------------------|---------|-----------------------|-----------------------|----------------------------------|----------|--|---|---|---|----------|------------------|
| d<br>Ar<br>thr<br>itis                          | 87<br>3                  |                      |                            |            | receptor<br>3                                             | co<br>upl<br>ed<br>rec<br>ept<br>or                          |         | 4<br>3                |                       | 2<br>6<br>3                      |          |  |   |   |   |          |                  |
| Rh<br>eu<br>ma<br>toi<br>d<br>Ar<br>thr<br>itis | C<br>00<br>03<br>87<br>3 | AN<br>G              | 2<br>8<br>3                | P0395<br>0 | angiogenin                                                |                                                              | 18<br>5 | 0<br>.<br>5<br>1<br>1 | 0<br>.<br>7<br>6<br>9 | 0.<br>2<br>8<br>7<br>3<br>8      | 0.<br>01 |  | 1 | 1 | 0 | 20<br>03 | 2<br>0<br>0<br>3 |
| Rh<br>eu<br>ma<br>toi<br>d<br>Ar<br>thr<br>itis | C<br>00<br>03<br>87<br>3 | H1<br>9              | 2<br>8<br>3<br>1<br>2<br>0 |            | H19 imprinted<br>maternally<br>expressed<br>transcript    |                                                              | 24<br>2 | 0<br>.<br>4<br>9<br>4 | 0<br>.<br>9<br>2<br>3 |                                  | 0.<br>01 |  | 1 | 1 | 2 | 20<br>03 | 2<br>0<br>0<br>3 |
| Rh<br>eu<br>ma<br>toi<br>d<br>Ar<br>thr<br>itis | C<br>00<br>03<br>87<br>3 | NE<br>AT<br>1        | 2<br>8<br>3<br>1<br>3<br>1 |            | nuclear<br>paraspeckle<br>assembly<br>transcript 1        |                                                              | 17<br>9 | 0<br>.<br>5<br>0<br>2 | 0<br>.<br>7<br>6<br>9 |                                  | 0.<br>01 |  | 1 | 1 | 0 | 20<br>19 | 2<br>0<br>1<br>9 |
| Rh<br>eu<br>ma<br>toi<br>d<br>Ar<br>thr<br>itis | C<br>00<br>03<br>87<br>3 | UT<br>S2<br>R        | 2<br>8<br>3<br>7           | Q9U<br>KP6 | urotensi<br>n 2<br>receptor                               | G-<br>pro<br>tei<br>n<br>co<br>upl<br>ed<br>rec<br>ept<br>or | 98      | 0<br>.<br>5<br>6<br>6 | 0<br>.<br>9<br>2      | 2.<br>3<br>2<br>E<br>-<br>0<br>5 | 0.<br>01 |  | 1 | 1 | 0 | 20<br>18 | 2<br>0<br>1<br>8 |
| Rh<br>eu<br>ma<br>toi<br>d<br>Ar<br>thr<br>itis | C<br>00<br>03<br>87<br>3 | IG<br>HV<br>5-<br>78 | 2<br>8<br>3<br>8<br>7      |            | immunoglobul<br>in heavy<br>variable 5-78<br>(pseudogene) |                                                              | 5       | 0<br>.<br>8<br>3<br>9 | 0<br>.<br>2<br>3<br>1 |                                  | 0.<br>01 |  | 1 | 1 | 0 | 20<br>01 | 2<br>0<br>0<br>1 |
| Rh<br>eu<br>ma<br>toi<br>d<br>Ar                | C<br>00<br>03<br>87<br>3 | IG<br>HV<br>1-<br>69 | 2<br>8<br>4<br>6<br>1      | P0174<br>2 | immunoglobul<br>in heavy<br>variable 1-69                 |                                                              | 19      | 0<br>.<br>7<br>2<br>9 | 0<br>.<br>4<br>6<br>2 |                                  | 0.<br>01 |  | 1 | 1 | 0 | 20<br>02 | 2<br>0<br>0<br>2 |

|                                                 |                          |                      |                            |                    |                                                                   |                                                              |         |                       |                       |                             |          |  |   |   |   |          |                  |
|-------------------------------------------------|--------------------------|----------------------|----------------------------|--------------------|-------------------------------------------------------------------|--------------------------------------------------------------|---------|-----------------------|-----------------------|-----------------------------|----------|--|---|---|---|----------|------------------|
| thr<br>itis                                     |                          |                      |                            |                    |                                                                   |                                                              |         |                       |                       |                             |          |  |   |   |   |          |                  |
| Rh<br>eu<br>ma<br>toi<br>d<br>Ar<br>thr<br>itis | C<br>00<br>03<br>87<br>3 | MI<br>F-<br>AS<br>1  | 2<br>8<br>4<br>8<br>8<br>9 |                    | MIF antisense<br>RNA 1                                            |                                                              | 38      | 0<br>.<br>6<br>6<br>3 | 0<br>.<br>5<br>7<br>7 |                             | 0.<br>01 |  | 1 | 1 | 2 | 19<br>99 | 1<br>9<br>9<br>9 |
| Rh<br>eu<br>ma<br>toi<br>d<br>Ar<br>thr<br>itis | C<br>00<br>03<br>87<br>3 | GP<br>ER<br>1        | 2<br>8<br>5<br>2           | Q995<br>27         | G<br>protein-<br>coupled<br>estrogen<br>receptor<br>1             | G-<br>pro<br>tei<br>n<br>co<br>upl<br>ed<br>rec<br>ept<br>or | 18<br>0 | 0<br>.<br>5<br>0<br>5 | 0<br>.<br>7<br>3<br>1 | 0.<br>5<br>7<br>4<br>3<br>4 | 0.<br>01 |  | 1 | 1 | 0 | 20<br>18 | 2<br>0<br>1<br>8 |
| Rh<br>eu<br>ma<br>toi<br>d<br>Ar<br>thr<br>itis | C<br>00<br>03<br>87<br>3 | CY<br>P4<br>V2       | 2<br>8<br>5<br>4<br>4<br>0 | Q6Z<br>WL3         | cytochro<br>me P450<br>family 4<br>subfamil<br>y V<br>member<br>2 | En<br>zy<br>me                                               | 42      | 0<br>.<br>6<br>7      | 0<br>.<br>5<br>7<br>7 | 2.<br>2<br>E<br>-<br>1<br>0 | 0.<br>01 |  | 1 | 1 | 0 | 20<br>19 | 2<br>0<br>1<br>9 |
| Rh<br>eu<br>ma<br>toi<br>d<br>Ar<br>thr<br>itis | C<br>00<br>03<br>87<br>3 | TR<br>BV<br>28       | 2<br>8<br>5<br>5<br>9      | A0A5<br>B6         | T cell receptor<br>beta variable<br>28                            |                                                              | 4       | 0<br>.<br>8<br>9      | 0<br>.<br>1<br>9<br>2 |                             | 0.<br>01 |  | 1 | 1 | 0 | 20<br>03 | 2<br>0<br>0<br>3 |
| Rh<br>eu<br>ma<br>toi<br>d<br>Ar<br>thr<br>itis | C<br>00<br>03<br>87<br>3 | TR<br>BV<br>27       | 2<br>8<br>5<br>6<br>0      | A0A0<br>K0K1<br>C4 | T cell receptor<br>beta variable<br>27                            |                                                              | 5       | 0<br>.<br>8<br>6<br>1 | 0<br>.<br>2<br>3<br>1 |                             | 0.<br>01 |  | 1 | 1 | 0 | 19<br>98 | 1<br>9<br>9<br>8 |
| Rh<br>eu<br>ma<br>toi<br>d<br>Ar<br>thr<br>itis | C<br>00<br>03<br>87<br>3 | TR<br>BV<br>20-<br>1 | 2<br>8<br>5<br>6<br>7      | A0A0<br>75B6<br>N2 | T cell receptor<br>beta variable<br>20-1                          |                                                              | 7       | 0<br>.<br>8<br>2<br>1 | 0<br>.<br>3<br>4<br>6 |                             | 0.<br>01 |  | 1 | 1 | 0 | 19<br>93 | 1<br>9<br>9<br>3 |

|                      |          |         |       |            |                                                    |                            |    |       |       |          |      |  |   |   |   |      |      |
|----------------------|----------|---------|-------|------------|----------------------------------------------------|----------------------------|----|-------|-------|----------|------|--|---|---|---|------|------|
| Rheumatoid Arthritis | C0003873 | TRBV14  | 28573 | A0A5B0     | T cell receptor beta variable 14                   |                            | 4  | 0.89  | 0.154 |          | 0.01 |  | 1 | 1 | 0 | 1998 | 1998 |
| Rheumatoid Arthritis | C0003873 | TRBV6-7 | 28600 |            | T cell receptor beta variable 6-7 (non-functional) |                            | 1  | 1     | 0.115 |          | 0.01 |  | 1 | 1 | 0 | 1996 | 1996 |
| Rheumatoid Arthritis | C0003873 | TRBV3-1 | 28619 | A0A576     | T cell receptor beta variable 3-1                  |                            | 4  | 0.89  | 0.192 |          | 0.01 |  | 1 | 1 | 0 | 2003 | 2003 |
| Rheumatoid Arthritis | C0003873 | TRBV2   | 28620 | A0A1B0GX68 | T cell receptor beta variable 2                    |                            | 4  | 0.861 | 0.269 |          | 0.01 |  | 1 | 1 | 0 | 1993 | 1993 |
| Rheumatoid Arthritis | C0003873 | GP39    | 2863  | O43194     | G protein-coupled receptor 39                      | G-protein coupled receptor | 45 | 0.65  | 0.615 | 2.81E-09 | 0.01 |  | 1 | 1 | 0 | 2019 | 2019 |
| Rheumatoid Arthritis | C0003873 | TRBC2   | 28638 | A0A5B9     | T cell receptor beta constant 2                    |                            | 4  | 0.931 | 0.192 |          | 0.01 |  | 1 | 1 | 0 | 1994 | 1994 |
| Rheumatoid           | C0003    | TRAV5   | 286   | A0A0B4J249 | T cell receptor alpha variable 5                   |                            | 1  | 1     | 0.1   |          | 0.01 |  | 1 | 1 | 0 | 1998 | 1998 |



|                                                 |                          |                       |                       |                    |                                                                               |                                    |         |                       |                       |                             |          |  |   |   |   |          |                  |
|-------------------------------------------------|--------------------------|-----------------------|-----------------------|--------------------|-------------------------------------------------------------------------------|------------------------------------|---------|-----------------------|-----------------------|-----------------------------|----------|--|---|---|---|----------|------------------|
| d<br>Ar<br>thr<br>itis                          | 87<br>3                  |                       | 8<br>8                |                    |                                                                               |                                    |         |                       | 1<br>5                |                             |          |  |   |   |   |          |                  |
| Rh<br>eu<br>ma<br>toi<br>d<br>Ar<br>thr<br>itis | C<br>00<br>03<br>87<br>3 | GR<br>K5              | 2<br>8<br>6<br>9      | P3494<br>7         | G<br>protein-<br>coupled<br>receptor<br>kinase 5                              | Ki<br>nas<br>e                     | 86      | 0<br>.<br>5<br>8<br>8 | 0<br>.<br>7<br>6<br>9 | 0.<br>6<br>7<br>5<br>6<br>7 | 0.<br>01 |  | 1 | 1 | 0 | 19<br>99 | 1<br>9<br>9<br>9 |
| Rh<br>eu<br>ma<br>toi<br>d<br>Ar<br>thr<br>itis | C<br>00<br>03<br>87<br>3 | GR<br>B2              | 2<br>8<br>8<br>5      | P6299<br>3         | growth factor<br>receptor<br>bound protein<br>2                               |                                    | 12<br>2 | 0<br>.<br>5<br>4<br>6 | 0<br>.<br>7<br>6<br>9 | 0.<br>9<br>3<br>9<br>3<br>4 | 0.<br>01 |  | 1 | 1 | 0 | 20<br>03 | 2<br>0<br>0<br>3 |
| Rh<br>eu<br>ma<br>toi<br>d<br>Ar<br>thr<br>itis | C<br>00<br>03<br>87<br>3 | IG<br>KV<br>3D-<br>15 | 2<br>8<br>8<br>7<br>5 | A0A0<br>87WS<br>Y6 | immuno<br>globulin<br>kappa<br>variable<br>3D-15<br>(gene/ps<br>eudogen<br>e) | Im<br>mu<br>ne<br>res<br>po<br>nse | 4       | 0<br>.<br>8<br>6<br>1 | 0<br>.<br>1<br>9<br>2 |                             | 0.<br>01 |  | 1 | 1 | 0 | 19<br>98 | 1<br>9<br>9<br>8 |
| Rh<br>eu<br>ma<br>toi<br>d<br>Ar<br>thr<br>itis | C<br>00<br>03<br>87<br>3 | GR<br>IA1             | 2<br>8<br>9<br>0      | P4226<br>1         | glutamat<br>e<br>ionotrop<br>ic<br>receptor<br>AMPA<br>type<br>subunit<br>1   | Ion<br>ch<br>an<br>nel             | 12<br>6 | 0<br>.<br>5<br>7      | 0<br>.<br>5<br>7<br>7 | 0.<br>9<br>9<br>8<br>6<br>9 | 0.<br>01 |  | 1 | 1 | 0 | 20<br>19 | 2<br>0<br>1<br>9 |
| Rh<br>eu<br>ma<br>toi<br>d<br>Ar<br>thr<br>itis | C<br>00<br>03<br>87<br>3 | IG<br>KV<br>1D-<br>8  | 2<br>8<br>9<br>0<br>4 | A0A0<br>87WS<br>Z0 | immuno<br>globulin<br>kappa<br>variable<br>1D-8                               | Im<br>mu<br>ne<br>res<br>po<br>nse | 4       | 0<br>.<br>8<br>6<br>1 | 0<br>.<br>1<br>9<br>2 |                             | 0.<br>01 |  | 1 | 1 | 0 | 19<br>98 | 1<br>9<br>9<br>8 |
| Rh<br>eu<br>ma<br>toi<br>d<br>Ar<br>thr<br>itis | C<br>00<br>03<br>87<br>3 | IG<br>KV<br>3-<br>20  | 2<br>8<br>9<br>1<br>2 | P0161<br>9         | immuno<br>globulin<br>kappa<br>variable<br>3-20                               | Im<br>mu<br>ne<br>res<br>po<br>nse | 19      | 0<br>.<br>7<br>3<br>6 | 0<br>.<br>3<br>0<br>8 |                             | 0.<br>01 |  | 1 | 1 | 0 | 19<br>98 | 1<br>9<br>9<br>8 |

|                      |          |          |       |         |                                                             |                |     |       |       |          |      |  |   |   |   |      |      |
|----------------------|----------|----------|-------|---------|-------------------------------------------------------------|----------------|-----|-------|-------|----------|------|--|---|---|---|------|------|
| Rheumatoid Arthritis | C0003873 | IGKV2-29 | 28920 | A2NJV5  | immunoglobulin kappa variable 2-29 (gene/psudogene)         | Immuneresponse | 12  | 0.769 | 0.231 |          | 0.01 |  | 1 | 1 | 0 | 1998 | 1998 |
| Rheumatoid Arthritis | C0003873 | REM1     | 28954 | O75628  | RRAD GEM GTPase 1                                           | and like       | 177 | 0.531 | 0.885 | 5.34E-08 | 0.01 |  | 1 | 1 | 0 | 2018 | 2018 |
| Rheumatoid Arthritis | C0003873 | LA MTOR2 | 28956 | Q9Y2Q5  | late endosomal/lysosomal adaptor, MAPK and MTOR activator 2 |                | 129 | 0.538 | 0.888 | 0.119816 | 0.01 |  | 1 | 1 | 0 | 1990 | 1990 |
| Rheumatoid Arthritis | C0003873 | RGCC     | 28984 | Q9H4X1  | regulator of cell cycle                                     | of             | 81  | 0.595 | 0.769 | 0.04815  | 0.01 |  | 1 | 1 | 0 | 2018 | 2018 |
| Rheumatoid Arthritis | C0003873 | HIPK2    | 28996 | Q9H2X6  | homeodomain interacting protein kinase 2                    | Kinase         | 102 | 0.566 | 0.731 | 1        | 0.01 |  | 0 | 1 | 0 | 2019 | 2019 |
| Rheumatoid Arthritis | C0003873 | GRK4     | 29000 | Q16099  | glutamate ionotropic receptor kainate type subunit 4        | Ion channel    | 41  | 0.678 | 0.413 | 0.1126   | 0.01 |  | 1 | 1 | 0 | 2014 | 2014 |
| Rheumatoid Arthritis | C0003873 | STXB P6  | 29091 | Q8NF X7 | syntrophin binding protein 6                                | Transporter    | 8   | 0.805 | 0.269 | 7.87E-01 | 0.01 |  | 1 | 1 | 0 | 2012 | 2012 |

|                                                 |                          |               |                       |            |                                                            |                                                              |         |                       |                       |                                  |          |  |   |   |   |          |                  |
|-------------------------------------------------|--------------------------|---------------|-----------------------|------------|------------------------------------------------------------|--------------------------------------------------------------|---------|-----------------------|-----------------------|----------------------------------|----------|--|---|---|---|----------|------------------|
| Ar<br>thr<br>itis                               |                          |               |                       |            |                                                            |                                                              |         |                       | 0<br>5                |                                  |          |  |   |   |   |          |                  |
| Rh<br>eu<br>ma<br>toi<br>d<br>Ar<br>thr<br>itis | C<br>00<br>03<br>87<br>3 | UH<br>RF<br>1 | 2<br>9<br>1<br>2<br>8 | Q96T<br>88 | ubiquitin like<br>with PHD and<br>ring finger<br>domains 1 |                                                              | 12<br>5 | 0<br>.<br>5<br>4      | 0<br>.<br>6<br>9<br>2 |                                  | 0.<br>01 |  | 1 | 1 | 0 | 20<br>16 | 2<br>0<br>1<br>6 |
| Rh<br>eu<br>ma<br>toi<br>d<br>Ar<br>thr<br>itis | C<br>00<br>03<br>87<br>3 | CX<br>CL<br>3 | 2<br>9<br>2<br>1      | P1987<br>6 | C-X-C<br>motif<br>chemoki<br>ne<br>ligand 3                | Sig<br>nal<br>ing                                            | 47      | 0<br>.<br>6<br>5      | 0<br>.<br>6<br>9<br>2 | 0.<br>0<br>0<br>0<br>3<br>0<br>2 | 0.<br>01 |  | 1 | 1 | 0 | 20<br>17 | 2<br>0<br>1<br>7 |
| Rh<br>eu<br>ma<br>toi<br>d<br>Ar<br>thr<br>itis | C<br>00<br>03<br>87<br>3 | PDI<br>A3     | 2<br>9<br>2<br>3      | P3010<br>1 | protein<br>disulfide<br>isomerase<br>family A<br>member 3  |                                                              | 10<br>0 | 0<br>.<br>5<br>6<br>6 | 0<br>.<br>7<br>6<br>9 | 0.<br>9<br>9<br>6<br>0<br>8      | 0.<br>01 |  | 1 | 1 | 0 | 20<br>16 | 2<br>0<br>1<br>6 |
| Rh<br>eu<br>ma<br>toi<br>d<br>Ar<br>thr<br>itis | C<br>00<br>03<br>87<br>3 | GR<br>PR      | 2<br>9<br>2<br>5      | P3055<br>0 | gastrin<br>releasin<br>g<br>peptide<br>receptor            | G-<br>pro<br>tei<br>n<br>co<br>upl<br>ed<br>rec<br>ept<br>or | 85      | 0<br>.<br>5<br>9<br>5 | 0<br>.<br>5<br>3<br>8 | 0.<br>2<br>2<br>4<br>4<br>4      | 0.<br>01 |  | 1 | 1 | 0 | 20<br>18 | 2<br>0<br>1<br>8 |
| Rh<br>eu<br>ma<br>toi<br>d<br>Ar<br>thr<br>itis | C<br>00<br>03<br>87<br>3 | GS<br>N       | 2<br>9<br>3<br>4      | P0639<br>6 | gelsolin                                                   | Ce<br>llul<br>ar<br>str<br>uct<br>ure                        | 26<br>2 | 0<br>.<br>4<br>7<br>5 | 0<br>.<br>8<br>8<br>5 | 3.<br>8<br>9<br>E<br>-<br>1<br>1 | 0.<br>01 |  | 1 | 1 | 0 | 20<br>08 | 2<br>0<br>0<br>8 |
| Rh<br>eu<br>ma<br>toi<br>d<br>Ar<br>thr<br>itis | C<br>00<br>03<br>87<br>3 | GT<br>S       | 2<br>9<br>7<br>3      |            | Gilles de la<br>Tourette<br>syndrome                       |                                                              | 32      | 0<br>.<br>6<br>8<br>2 | 0<br>.<br>6<br>1<br>5 |                                  | 0.<br>01 |  | 1 | 1 | 0 | 20<br>18 | 2<br>0<br>1<br>8 |

|                      |         |          |       |        |                                                       |                         |     |       |       |          |      |  |   |   |   |      |      |
|----------------------|---------|----------|-------|--------|-------------------------------------------------------|-------------------------|-----|-------|-------|----------|------|--|---|---|---|------|------|
| Rheumatoid Arthritis | C003873 | GY S1    | 2997  | P13807 | glycogen synthase 1                                   |                         | 26  | 0.722 | 0.385 | 0.0291   | 0.01 |  | 1 | 1 | 0 | 2018 | 2018 |
| Rheumatoid Arthritis | C003873 | EF EM P2 | 30008 | O95967 | EGF containing fibulin extracellular matrix protein 2 | Calcium-binding protein | 126 | 0.59  | 0.692 | 0.0814   | 0.01 |  | 1 | 1 | 0 | 2006 | 2006 |
| Rheumatoid Arthritis | C003873 | GZ MM    | 3004  | P51124 | granzyme M                                            | Enzyme                  | 36  | 0.686 | 0.577 | 0.0125   | 0.01 |  | 1 | 1 | 0 | 2020 | 2020 |
| Rheumatoid Arthritis | C003873 | AN XA 2  | 3002  | P07355 | annexin A2                                            |                         | 294 | 0.453 | 0.808 | 9.77E-05 | 0.01 |  | 1 | 1 | 0 | 2019 | 2019 |
| Rheumatoid Arthritis | C003873 | HA GH    | 3029  | Q16775 | hydroxyacylglutathione hydrolase                      |                         | 20  | 0.729 | 0.462 | 0.0177   | 0.01 |  | 1 | 1 | 0 | 1990 | 1990 |
| Rheumatoid Arthritis | C003873 | HA RS 1  | 3035  | P12081 | histidyl-tRNA synthetase 1                            | Enzyme                  | 127 | 0.569 | 0.808 | 2.38E-06 | 0.01 |  | 1 | 1 | 0 | 2006 | 2006 |
| Rheumatoid           | C003    | HA S1    | 3036  | Q92839 | hyaluronan synthase 1                                 |                         | 45  | 0.67  | 0.5   | 1.31E    | 0.01 |  | 1 | 1 | 0 | 2004 | 2004 |

|                                                 |                          |                |                  |            |                                        |                                                              |    |                       |                       |                                  |          |  |   |   |   |          |                  |
|-------------------------------------------------|--------------------------|----------------|------------------|------------|----------------------------------------|--------------------------------------------------------------|----|-----------------------|-----------------------|----------------------------------|----------|--|---|---|---|----------|------------------|
| d<br>Ar<br>thr<br>itis                          | 87<br>3                  |                |                  |            |                                        |                                                              |    |                       | 7<br>7                | -<br>1<br>2                      |          |  |   |   |   |          |                  |
| Rh<br>eu<br>ma<br>toi<br>d<br>Ar<br>thr<br>itis | C<br>00<br>03<br>87<br>3 | HA<br>S3       | 3<br>0<br>3<br>8 | O002<br>19 | hyaluronan<br>synthase 3               |                                                              | 51 | 0<br>.<br>6<br>4<br>4 | 0<br>.<br>6<br>9<br>2 | 0.<br>8<br>8<br>3<br>1<br>6      | 0.<br>01 |  | 1 | 1 | 0 | 20<br>04 | 2<br>0<br>0<br>4 |
| Rh<br>eu<br>ma<br>toi<br>d<br>Ar<br>thr<br>itis | C<br>00<br>03<br>87<br>3 | HC<br>RT<br>R1 | 3<br>0<br>6<br>1 | O436<br>13 | hypocret<br>in<br>receptor<br>1        | G-<br>pro<br>tei<br>n<br>co<br>upl<br>ed<br>rec<br>ept<br>or | 71 | 0<br>.<br>6<br>2<br>3 | 0<br>.<br>6<br>5<br>4 | 0.<br>0<br>0<br>0<br>1<br>7<br>4 | 0.<br>01 |  | 1 | 1 | 0 | 20<br>18 | 2<br>0<br>1<br>8 |
| Rh<br>eu<br>ma<br>toi<br>d<br>Ar<br>thr<br>itis | C<br>00<br>03<br>87<br>3 | HD<br>C        | 3<br>0<br>6<br>7 | P1911<br>3 | histidine<br>decarboxylase             |                                                              | 92 | 0<br>.<br>5<br>8<br>4 | 0<br>.<br>6<br>9<br>2 | 0.<br>0<br>0<br>4<br>1<br>0<br>9 | 0.<br>01 |  | 1 | 1 | 0 | 20<br>04 | 2<br>0<br>0<br>4 |
| Rh<br>eu<br>ma<br>toi<br>d<br>Ar<br>thr<br>itis | C<br>00<br>03<br>87<br>3 | AN<br>XA<br>4  | 3<br>0<br>7      | P0952<br>5 | annexin A4                             |                                                              | 74 | 0<br>.<br>5<br>9<br>9 | 0<br>.<br>6<br>9<br>2 | 1.<br>1<br>9<br>E<br>-<br>0<br>8 | 0.<br>01 |  | 1 | 1 | 0 | 20<br>17 | 2<br>0<br>1<br>7 |
| Rh<br>eu<br>ma<br>toi<br>d<br>Ar<br>thr<br>itis | C<br>00<br>03<br>87<br>3 | HE<br>XA       | 3<br>0<br>7<br>3 | P0686<br>5 | hexosam<br>inidase<br>subunit<br>alpha | En<br>zy<br>me                                               | 79 | 0<br>.<br>6<br>3<br>3 | 0<br>.<br>6<br>1<br>5 | 1.<br>3<br>4<br>E<br>-<br>1<br>1 | 0.<br>01 |  | 1 | 1 | 0 | 20<br>02 | 2<br>0<br>0<br>2 |
| Rh<br>eu<br>ma<br>toi<br>d<br>Ar<br>thr<br>itis | C<br>00<br>03<br>87<br>3 | HE<br>XB       | 3<br>0<br>7<br>4 | P0768<br>6 | hexosam<br>inidase<br>subunit<br>beta  | En<br>zy<br>me                                               | 62 | 0<br>.<br>6<br>4<br>4 | 0<br>.<br>6<br>5<br>4 | 3.<br>4<br>9<br>E<br>-<br>1<br>0 | 0.<br>01 |  | 1 | 1 | 0 | 20<br>02 | 2<br>0<br>0<br>2 |

|                      |          |          |       |        |                                                                    |             |     |       |       |          |      |  |   |   |   |      |      |
|----------------------|----------|----------|-------|--------|--------------------------------------------------------------------|-------------|-----|-------|-------|----------|------|--|---|---|---|------|------|
| Rheumatoid Arthritis | C0003873 | ANXA5    | 308   | P08758 | annexin A5                                                         |             | 283 | 0.458 | 0.769 | 3.8E-15  | 0.01 |  | 1 | 1 | 0 | 2013 | 2013 |
| Rheumatoid Arthritis | C0003873 | KCNIP3   | 30818 | Q9Y2W7 | potassium voltage-gated channel interacting protein 3              | Ion channel | 60  | 0.626 | 0.654 | 0.03604  | 0.01 |  | 1 | 1 | 0 | 2016 | 2016 |
| Rheumatoid Arthritis | C0003873 | CD209    | 30835 | Q9NWX6 | CD209 molecule                                                     | Receptor    | 57  | 0.626 | 0.769 | 2.74E-13 | 0.01 |  | 1 | 1 | 0 | 2009 | 2009 |
| Rheumatoid Arthritis | C0003873 | TAX1BP3  | 30851 | O14907 | Tax1 binding protein 3                                             |             | 27  | 0.716 | 0.615 | 0.005243 | 0.01 |  | 1 | 1 | 0 | 2019 | 2019 |
| Rheumatoid Arthritis | C0003873 | HK1      | 3098  | P19367 | hexokinase 1                                                       | Kinase      | 161 | 0.542 | 0.731 | 0.091459 | 0.01 |  | 1 | 1 | 0 | 2019 | 2019 |
| Rheumatoid Arthritis | C0003873 | HK2      | 3099  | P52789 | hexokinase 2                                                       | Kinase      | 152 | 0.515 | 0.769 | 0.004589 | 0.01 |  | 1 | 1 | 0 | 2018 | 2018 |
| Rheumatoid Ar        | C0003873 | HLA-DRB2 | 3124  |        | major histocompatibility complex, class II, DR beta 2 (pseudogene) |             | 8   | 0.861 | 0.269 |          | 0.01 |  | 1 | 1 | 0 | 2018 | 2018 |

|                                                 |                          |                      |                  |            |                                                                                    |         |                       |                       |                                  |          |  |   |   |   |          |                  |
|-------------------------------------------------|--------------------------|----------------------|------------------|------------|------------------------------------------------------------------------------------|---------|-----------------------|-----------------------|----------------------------------|----------|--|---|---|---|----------|------------------|
| thr<br>itis                                     |                          |                      |                  |            |                                                                                    |         |                       |                       |                                  |          |  |   |   |   |          |                  |
| Rh<br>eu<br>ma<br>toi<br>d<br>Ar<br>thr<br>itis | C<br>00<br>03<br>87<br>3 | HL<br>A-<br>DR<br>B6 | 3<br>1<br>2<br>8 |            | major<br>histocompatib<br>ility complex,<br>class II, DR<br>beta 6<br>(pseudogene) | 9       | 0<br>.<br>8<br>2<br>1 | 0<br>.<br>3<br>0<br>8 |                                  | 0.<br>01 |  | 1 | 1 | 0 | 20<br>12 | 2<br>0<br>1<br>2 |
| Rh<br>eu<br>ma<br>toi<br>d<br>Ar<br>thr<br>itis | C<br>00<br>03<br>87<br>3 | HL<br>A-<br>E        | 3<br>1<br>3<br>3 | P1374<br>7 | major<br>histocompatib<br>ility complex,<br>class I, E                             | 11<br>8 | 0<br>.<br>5<br>4<br>5 | 0<br>.<br>7<br>6<br>9 | 0.<br>0<br>3<br>6<br>7<br>7<br>3 | 0.<br>01 |  | 1 | 1 | 0 | 20<br>15 | 2<br>0<br>1<br>5 |
| Rh<br>eu<br>ma<br>toi<br>d<br>Ar<br>thr<br>itis | C<br>00<br>03<br>87<br>3 | HM<br>GC<br>R        | 3<br>1<br>5<br>6 | P0403<br>5 | 3-hydroxy-3-<br>methylglutaryl<br>-CoA<br>reductase                                | 15<br>4 | 0<br>.<br>5<br>2<br>9 | 0<br>.<br>6<br>9<br>2 | 0.<br>9<br>9<br>8<br>6<br>1      | 0.<br>01 |  | 1 | 1 | 0 | 20<br>06 | 2<br>0<br>0<br>6 |
| Rh<br>eu<br>ma<br>toi<br>d<br>Ar<br>thr<br>itis | C<br>00<br>03<br>87<br>3 | HM<br>MR             | 3<br>1<br>6<br>1 | O753<br>30 | hyaluronan<br>mediated<br>motility<br>receptor                                     | 11<br>7 | 0<br>.<br>5<br>4<br>4 | 0<br>.<br>6<br>1<br>5 | 5.<br>5<br>2<br>E<br>-<br>2<br>1 | 0.<br>01 |  | 1 | 1 | 0 | 20<br>18 | 2<br>0<br>1<br>8 |
| Rh<br>eu<br>ma<br>toi<br>d<br>Ar<br>thr<br>itis | C<br>00<br>03<br>87<br>3 | AP<br>AF<br>1        | 3<br>1<br>7      | O147<br>27 | apoptotic<br>peptidase<br>activating<br>factor 1                                   | 14<br>5 | 0<br>.<br>5<br>2<br>5 | 0<br>.<br>7<br>6<br>9 | 9.<br>6<br>2<br>E<br>-<br>0<br>6 | 0.<br>01 |  | 1 | 1 | 0 | 20<br>17 | 2<br>0<br>1<br>7 |
| Rh<br>eu<br>ma<br>toi<br>d<br>Ar<br>thr<br>itis | C<br>00<br>03<br>87<br>3 | HN<br>RN<br>PC       | 3<br>1<br>8<br>3 | P0791<br>0 | heterogeneous<br>nuclear<br>ribonucleoprot<br>ein C                                | 61      | 0<br>.<br>6<br>0<br>6 | 0<br>.<br>5<br>3<br>8 | 0.<br>9<br>7<br>7<br>2           | 0.<br>01 |  | 1 | 1 | 0 | 19<br>96 | 1<br>9<br>9<br>6 |
| Rh<br>eu<br>ma<br>toi                           | C<br>00<br>03            | HO<br>XB<br>2        | 3<br>2<br>1<br>2 | P1465<br>2 | homeobox B2                                                                        | 52      | 0<br>.<br>6           | 0<br>.<br>5           | 0.<br>0<br>0<br>0                | 0.<br>01 |  | 1 | 1 | 0 | 20<br>05 | 2<br>0<br>0<br>5 |

|                                                 |                          |               |                  |            |                                                         |                                             |                       |                       |                                  |                                  |          |   |   |   |          |                  |                  |
|-------------------------------------------------|--------------------------|---------------|------------------|------------|---------------------------------------------------------|---------------------------------------------|-----------------------|-----------------------|----------------------------------|----------------------------------|----------|---|---|---|----------|------------------|------------------|
| d<br>Ar<br>thr<br>itis                          | 87<br>3                  |               |                  |            |                                                         |                                             | 1<br>2                | 7<br>7                | 1<br>4<br>6                      |                                  |          |   |   |   |          |                  |                  |
| Rh<br>eu<br>ma<br>toi<br>d<br>Ar<br>thr<br>itis | C<br>00<br>03<br>87<br>3 | HO<br>XD<br>4 | 3<br>2<br>3<br>3 | P0901<br>6 | homeobox D4                                             | 15                                          | 0<br>.<br>7<br>6      | 0<br>.<br>3<br>4<br>6 | 0.<br>0<br>0<br>5<br>4<br>4<br>8 | 0.<br>01                         |          | 1 | 1 | 0 | 19<br>96 | 1<br>9<br>9<br>6 |                  |
| Rh<br>eu<br>ma<br>toi<br>d<br>Ar<br>thr<br>itis | C<br>00<br>03<br>87<br>3 | AP<br>CS      | 3<br>2<br>5      | P0274<br>3 | amyloid P<br>component,<br>serum                        | 14<br>1                                     | 0<br>.<br>5<br>3<br>1 | 0<br>.<br>8<br>0<br>8 | 0.<br>0<br>3<br>1<br>7<br>4      | 0.<br>01                         |          | 1 | 1 | 0 | 20<br>11 | 2<br>0<br>1<br>1 |                  |
| Rh<br>eu<br>ma<br>toi<br>d<br>Ar<br>thr<br>itis | C<br>00<br>03<br>87<br>3 | HP<br>RT<br>1 | 3<br>2<br>5<br>1 | P0049<br>2 | hypoxan<br>thine<br>phospho<br>ribosyltr<br>ansferase 1 | En<br>zy<br>me                              | 21<br>0               | 0<br>.<br>5           | 0<br>.<br>8<br>0<br>8            | 0.<br>9<br>3<br>7<br>2<br>8      | 0.<br>01 |   | 1 | 1 | 0        | 19<br>98         | 1<br>9<br>9<br>8 |
| Rh<br>eu<br>ma<br>toi<br>d<br>Ar<br>thr<br>itis | C<br>00<br>03<br>87<br>3 | HR<br>G       | 3<br>2<br>7<br>3 | P0419<br>6 | histidine<br>rich<br>glycopro<br>tein                   | En<br>zy<br>me<br>mo<br>dul<br>ato<br>r     | 72                    | 0<br>.<br>6<br>0<br>3 | 0<br>.<br>5<br>7                 | 5.<br>8<br>9<br>E<br>-<br>1<br>4 | 0.<br>01 |   | 1 | 1 | 0        | 20<br>18         | 2<br>0<br>1<br>8 |
| Rh<br>eu<br>ma<br>toi<br>d<br>Ar<br>thr<br>itis | C<br>00<br>03<br>87<br>3 | PR<br>MT<br>1 | 3<br>2<br>7<br>6 | Q998<br>73 | protein<br>arginine<br>methyltr<br>ansferase 1          | Ep<br>ige<br>net<br>ic<br>reg<br>ula<br>tor | 11<br>0               | 0<br>.<br>5<br>5<br>2 | 0<br>.<br>8<br>0<br>8            | 0.<br>9<br>9<br>0<br>7           | 0.<br>01 |   | 1 | 1 | 0        | 20<br>18         | 2<br>0<br>1<br>8 |
| Rh<br>eu<br>ma<br>toi<br>d<br>Ar<br>thr<br>itis | C<br>00<br>03<br>87<br>3 | HE<br>S1      | 3<br>2<br>8<br>0 | Q144<br>69 | hes<br>family<br>bHLH<br>transcrip<br>tion<br>factor 1  | Tr<br>ans<br>cri<br>pti<br>on<br>fac<br>tor | 24<br>3               | 0<br>.<br>4<br>6<br>8 | 0<br>.<br>8<br>8<br>5            | 0.<br>7<br>0<br>7<br>2           | 0.<br>01 |   | 1 | 1 | 0        | 20<br>17         | 2<br>0<br>1<br>7 |



|                      |          |         |      |                  |                                               |                  |     |       |       |         |      |  |   |   |   |      |      |
|----------------------|----------|---------|------|------------------|-----------------------------------------------|------------------|-----|-------|-------|---------|------|--|---|---|---|------|------|
| Rheumatoid Arthritis | C0003873 | BI RC2  | 329  | Q13490           | baculoviral IAP repeat containing 2           | Enzyme modulator | 125 | 0.535 | 0.731 | 0.42708 | 0.01 |  | 1 | 1 | 0 | 2019 | 2019 |
| Rheumatoid Arthritis | C0003873 | BI RC3  | 330  | Q13489           | baculoviral IAP repeat containing 3           | Enzyme modulator | 209 | 0.491 | 0.769 | 0.06597 | 0.01 |  | 1 | 1 | 0 | 2019 | 2019 |
| Rheumatoid Arthritis | C0003873 | HS PA1A | 3303 | P0D MV8; P0D MV9 | heat shock protein family A (Hsp70) member 1A |                  | 229 | 0.486 | 0.769 | 0.0328  | 0.01 |  | 1 | 1 | 0 | 1996 | 1996 |
| Rheumatoid Arthritis | C0003873 | HS PA1B | 3304 | P0D MV8; P0D MV9 | heat shock protein family A (Hsp70) member 1B |                  | 251 | 0.474 | 0.808 | 0.05346 | 0.01 |  | 1 | 1 | 0 | 1996 | 1996 |
| Rheumatoid Arthritis | C0003873 | HS PA5  | 3309 | P11021           | heat shock protein family A (Hsp70) member 5  |                  | 350 | 0.434 | 0.835 | 0.07341 | 0.01 |  | 1 | 1 | 0 | 2014 | 2014 |
| Rheumatoid Arthritis | C0003873 | XI AP   | 331  | P98170           | X-linked inhibitor of apoptosis               | Enzyme modulator | 321 | 0.447 | 0.808 | 0.09837 | 0.01 |  | 1 | 1 | 0 | 2000 | 2000 |
| Rheumatoid Ar        | C0003873 | HS PB1  | 3315 | P04792           | heat shock protein family B (small) member 1  |                  | 395 | 0.436 | 0.808 | 2.78E-  | 0.01 |  | 1 | 1 | 0 | 2011 | 2011 |

|                                                 |                          |               |                            |            |                                                       |                         |                       |                       |                                  |                             |          |   |   |   |          |                  |                  |
|-------------------------------------------------|--------------------------|---------------|----------------------------|------------|-------------------------------------------------------|-------------------------|-----------------------|-----------------------|----------------------------------|-----------------------------|----------|---|---|---|----------|------------------|------------------|
| thr<br>itis                                     |                          |               |                            |            |                                                       |                         |                       |                       | 0<br>7                           |                             |          |   |   |   |          |                  |                  |
| Rh<br>eu<br>ma<br>toi<br>d<br>Ar<br>thr<br>itis | C<br>00<br>03<br>87<br>3 | HS<br>PB<br>2 | 3<br>3<br>1<br>6           | Q160<br>82 | heat shock<br>protein family<br>B (small)<br>member 2 | 29<br>0                 | 0<br>.<br>4<br>5<br>7 | 0<br>.<br>7<br>6<br>9 | 0.<br>0<br>0<br>3<br>3           | 0.<br>01                    |          | 1 | 1 | 0 | 20<br>11 | 2<br>0<br>1<br>1 |                  |
| Rh<br>eu<br>ma<br>toi<br>d<br>Ar<br>thr<br>itis | C<br>00<br>03<br>87<br>3 | ND<br>ST<br>1 | 3<br>3<br>4<br>0           | P5284<br>8 | N-deacetylase<br>and N-<br>sulfotransferas<br>e 1     | 93                      | 0<br>.<br>6<br>0<br>8 | 0<br>.<br>6<br>9<br>2 | 0.<br>9<br>9<br>9<br>5           | 0.<br>01                    |          | 1 | 1 | 0 | 20<br>19 | 2<br>0<br>1<br>9 |                  |
| Rh<br>eu<br>ma<br>toi<br>d<br>Ar<br>thr<br>itis | C<br>00<br>03<br>87<br>3 | AP<br>OA<br>1 | 3<br>3<br>5                | P0264<br>7 | apolipoprotein<br>A1                                  | 41<br>6                 | 0<br>.<br>4<br>2<br>9 | 0<br>.<br>8<br>8<br>5 | 0.<br>0<br>0<br>5<br>4<br>9      | 0.<br>01                    |          | 0 | 1 | 0 | 20<br>15 | 2<br>0<br>1<br>5 |                  |
| Rh<br>eu<br>ma<br>toi<br>d<br>Ar<br>thr<br>itis | C<br>00<br>03<br>87<br>3 | AP<br>OA<br>2 | 3<br>3<br>6                | P0265<br>2 | apolipop<br>rotein<br>A2                              | Tr<br>ans<br>por<br>ter | 77                    | 0<br>.<br>5<br>8<br>2 | 0<br>.<br>7<br>6<br>9            | 0.<br>0<br>4<br>4<br>8      | 0.<br>01 |   | 1 | 1 | 0        | 20<br>03         | 2<br>0<br>0<br>3 |
| Rh<br>eu<br>ma<br>toi<br>d<br>Ar<br>thr<br>itis | C<br>00<br>03<br>87<br>3 | IAP<br>P      | 3<br>3<br>7<br>5           | P1099<br>7 | islet<br>amyloid<br>polypept<br>ide                   | Sig<br>nal<br>ing       | 18<br>3               | 0<br>.<br>5<br>0<br>7 | 0<br>.<br>8<br>0<br>8            | 0.<br>0<br>3<br>1<br>8<br>1 | 0.<br>01 |   | 1 | 1 | 0        | 20<br>18         | 2<br>0<br>1<br>8 |
| Rh<br>eu<br>ma<br>toi<br>d<br>Ar<br>thr<br>itis | C<br>00<br>03<br>87<br>3 | RS<br>PO<br>2 | 3<br>4<br>0<br>4<br>1<br>9 | Q6U<br>XX9 | R-spondin 2                                           | 11<br>3                 | 0<br>.<br>5<br>5<br>8 | 0<br>.<br>5<br>7<br>7 | 0.<br>0<br>2<br>4<br>6<br>0<br>8 | 0.<br>01                    |          | 1 | 1 | 0 | 20<br>12 | 2<br>0<br>1<br>2 |                  |
| Rh<br>eu<br>ma<br>toi                           | C<br>00<br>03            | ID<br>DM<br>7 | 3<br>4<br>0<br>6           |            | insulin<br>dependent<br>diabetes<br>mellitus 7        | 5                       | 0<br>.<br>8           | 0<br>.<br>1           |                                  | 0.<br>01                    |          | 0 | 1 | 0 | 20<br>00 | 2<br>0<br>0<br>0 |                  |

|                                                 |                          |                 |                            |            |                                                                          |                                             |                  |                       |                            |                                  |          |   |   |   |          |                  |                  |
|-------------------------------------------------|--------------------------|-----------------|----------------------------|------------|--------------------------------------------------------------------------|---------------------------------------------|------------------|-----------------------|----------------------------|----------------------------------|----------|---|---|---|----------|------------------|------------------|
| d<br>Ar<br>thr<br>itis                          | 87<br>3                  |                 |                            |            |                                                                          |                                             | 6<br>1           | 9<br>2                |                            |                                  |          |   |   |   |          |                  |                  |
| Rh<br>eu<br>ma<br>toi<br>d<br>Ar<br>thr<br>itis | C<br>00<br>03<br>87<br>3 | ID<br>DM<br>13  | 3<br>4<br>1<br>2           |            | insulin<br>dependent<br>diabetes<br>mellitus 13                          | 3                                           | 0<br>.<br>8<br>9 | 0<br>.<br>1<br>9<br>2 |                            | 0.<br>01                         |          | 1 | 1 | 0 | 20<br>02 | 2<br>0<br>0<br>2 |                  |
| Rh<br>eu<br>ma<br>toi<br>d<br>Ar<br>thr<br>itis | C<br>00<br>03<br>87<br>3 | IFI<br>16       | 3<br>4<br>2<br>8           | Q166<br>66 | interfero<br>n<br>gamma<br>inducibl<br>e protein<br>16                   | Tr<br>ans<br>cri<br>pti<br>on<br>fac<br>tor | 79               | 0<br>.<br>6<br>0<br>3 | 0<br>.<br>7<br>6<br>9      | 1.<br>7<br>8<br>E<br>-<br>1<br>1 | 0.<br>01 |   | 1 | 1 | 0        | 20<br>17         | 2<br>0<br>1<br>7 |
| Rh<br>eu<br>ma<br>toi<br>d<br>Ar<br>thr<br>itis | C<br>00<br>03<br>87<br>3 | IFI<br>27       | 3<br>4<br>2<br>9           | P4030<br>5 | interferon<br>alpha<br>inducible<br>protein 27                           |                                             | 33<br>2          | 0<br>.<br>4<br>3<br>7 | 0<br>.<br>7<br>6<br>9      | 0.<br>0<br>1<br>0<br>6<br>9<br>8 | 0.<br>01 |   | 1 | 1 | 0        | 20<br>05         | 2<br>0<br>0<br>5 |
| Rh<br>eu<br>ma<br>toi<br>d<br>Ar<br>thr<br>itis | C<br>00<br>03<br>87<br>3 | IFI<br>35       | 3<br>4<br>3<br>0           | P8021<br>7 | interfero<br>n<br>induced<br>protein<br>35                               | Tr<br>ans<br>cri<br>pti<br>on<br>fac<br>tor | 17               | 0<br>.<br>7<br>6      | 0<br>.<br>4<br>6<br>2      | 4.<br>2<br>8<br>E<br>-<br>0<br>7 | 0.<br>01 |   | 1 | 1 | 0        | 20<br>13         | 2<br>0<br>1<br>3 |
| Rh<br>eu<br>ma<br>toi<br>d<br>Ar<br>thr<br>itis | C<br>00<br>03<br>87<br>3 | CY<br>CS<br>P51 | 3<br>4<br>3<br>0<br>4<br>5 |            | CYCS<br>pseudogene 51                                                    |                                             | 15               | 0<br>.<br>7<br>5<br>1 | 0<br>.<br>4<br>2<br>3      |                                  | 0.<br>01 |   | 1 | 1 | 0        | 20<br>18         | 2<br>0<br>1<br>8 |
| Rh<br>eu<br>ma<br>toi<br>d<br>Ar<br>thr<br>itis | C<br>00<br>03<br>87<br>3 | IFI<br>T2       | 3<br>4<br>3<br>3           | P0991<br>3 | interferon<br>induced<br>protein with<br>tetratricopepti<br>de repeats 2 |                                             | 42               | 0<br>.<br>6<br>5<br>6 | 0<br>.<br>5<br>0<br>9<br>9 | 0.<br>2<br>5<br>0<br>9<br>9      | 0.<br>01 |   | 1 | 1 | 0        | 20<br>17         | 2<br>0<br>1<br>7 |

|                      |          |        |        |        |                                                             |                  |     |          |           |      |  |   |   |   |      |      |
|----------------------|----------|--------|--------|--------|-------------------------------------------------------------|------------------|-----|----------|-----------|------|--|---|---|---|------|------|
| Rheumatoid Arthritis | C0003873 | IFT1   | 3434   | P09914 | interferon induced protein with tetratricopeptide repeats 1 |                  | 39  | 0.666    | 0.50278   | 0.01 |  | 1 | 1 | 0 | 2017 | 2017 |
| Rheumatoid Arthritis | C0003873 | IFNGR2 | 3460   | P38484 | interferon gamma receptor 2                                 | Receptor         | 71  | 0.597    | 0.5781    | 0.01 |  | 1 | 1 | 0 | 2015 | 2015 |
| Rheumatoid Arthritis | C0003873 | ZNF391 | 346157 | Q9UJN7 | zinc finger protein 391                                     |                  | 1   | 1        | 0.15E-08  | 0.01 |  | 1 | 1 | 0 | 2011 | 2011 |
| Rheumatoid Arthritis | C0003873 | IGFBP4 | 3487   | P22692 | insulin like growth factor binding protein 4                | Enzyme modulator | 94  | 0.572257 | 0.0023057 | 0.01 |  | 1 | 1 | 0 | 2005 | 2005 |
| Rheumatoid Arthritis | C0003873 | IGFBP6 | 3489   | P24592 | insulin like growth factor binding protein 6                | Enzyme modulator | 71  | 0.601215 | 0.002915  | 0.01 |  | 1 | 1 | 0 | 2017 | 2017 |
| Rheumatoid Arthritis | C0003873 | IGFBP7 | 3490   | Q16270 | insulin like growth factor binding protein 7                |                  | 241 | 0.4769   | 0.001287  | 0.01 |  | 1 | 1 | 0 | 2011 | 2011 |
| Rheumatoid Ar        | C0003873 | IGH    | 3492   |        | immunoglobulin heavy locus                                  |                  | 238 | 0.473    | 0.654     | 0.01 |  | 1 | 1 | 0 | 2017 | 2017 |

|                                                 |                          |                |                            |                           |                                                                        |                   |                       |                       |                                  |                             |          |   |   |   |          |                  |                  |
|-------------------------------------------------|--------------------------|----------------|----------------------------|---------------------------|------------------------------------------------------------------------|-------------------|-----------------------|-----------------------|----------------------------------|-----------------------------|----------|---|---|---|----------|------------------|------------------|
| thr<br>itis                                     |                          |                |                            |                           |                                                                        |                   |                       |                       |                                  |                             |          |   |   |   |          |                  |                  |
| Rh<br>eu<br>ma<br>toi<br>d<br>Ar<br>thr<br>itis | C<br>00<br>03<br>87<br>3 | NM<br>NA<br>T3 | 3<br>4<br>9<br>5<br>6<br>5 | Q96T<br>66                | nicotinamide<br>nucleotide<br>adenylyltransf<br>erase 3                | 7                 | 0<br>.<br>8<br>2<br>1 | 0<br>.<br>3<br>4<br>6 | 6.<br>2<br>4<br>E<br>-<br>0<br>8 | 0.<br>01                    |          | 1 | 1 | 0 | 20<br>19 | 2<br>0<br>1<br>9 |                  |
| Rh<br>eu<br>ma<br>toi<br>d<br>Ar<br>thr<br>itis | C<br>00<br>03<br>87<br>3 | IG<br>KC       | 3<br>5<br>1<br>4           | P0183<br>4                | immunoglobul<br>in kappa<br>constant                                   | 26                | 0<br>.<br>7           | 0<br>.<br>4<br>2<br>3 |                                  | 0.<br>01                    |          | 1 | 1 | 0 | 19<br>89 | 1<br>9<br>8<br>9 |                  |
| Rh<br>eu<br>ma<br>toi<br>d<br>Ar<br>thr<br>itis | C<br>00<br>03<br>87<br>3 | HL<br>A-P      | 3<br>5<br>2<br>9<br>6<br>3 |                           | major<br>histocompatib<br>ility complex,<br>class I, P<br>(pseudogene) | 2                 | 0<br>.<br>9<br>3<br>1 | 0<br>.<br>1<br>9<br>2 |                                  | 0.<br>01                    |          | 1 | 1 | 0 | 20<br>09 | 2<br>0<br>0<br>9 |                  |
| Rh<br>eu<br>ma<br>toi<br>d<br>Ar<br>thr<br>itis | C<br>00<br>03<br>87<br>3 | PA<br>DI6      | 3<br>5<br>3<br>2<br>3<br>8 | Q6TG<br>C4                | peptidyl<br>arginine<br>deiminase 6                                    | 14                | 0<br>.<br>7<br>6      | 0<br>.<br>2<br>6<br>9 |                                  | 0.<br>01                    |          | 1 | 1 | 0 | 20<br>07 | 2<br>0<br>0<br>7 |                  |
| Rh<br>eu<br>ma<br>toi<br>d<br>Ar<br>thr<br>itis | C<br>00<br>03<br>87<br>3 | TIC<br>AM<br>2 | 3<br>5<br>3<br>3<br>7<br>6 | Q86X<br>R7;Q<br>9Y3B<br>3 | toll like<br>receptor<br>adaptor<br>molecule 2                         | 33<br>2           | 0<br>.<br>4<br>3<br>8 | 0<br>.<br>7<br>6<br>9 | 0.<br>0<br>0<br>2<br>5<br>9<br>4 | 0.<br>01                    |          | 1 | 1 | 0 | 20<br>05 | 2<br>0<br>0<br>5 |                  |
| Rh<br>eu<br>ma<br>toi<br>d<br>Ar<br>thr<br>itis | C<br>00<br>03<br>87<br>3 | IL2<br>RG      | 3<br>5<br>6<br>1           | P3178<br>5                | interleuk<br>in 2<br>receptor<br>subunit<br>gamma                      | Sig<br>nal<br>ing | 16<br>4               | 0<br>.<br>5<br>3<br>5 | 0<br>.<br>7<br>6<br>9            | 0.<br>9<br>9<br>1<br>5<br>2 | 0.<br>01 |   | 1 | 1 | 0        | 20<br>14         | 2<br>0<br>1<br>4 |
| Rh<br>eu<br>ma<br>toi                           | C<br>00<br>03            | IL1<br>1R<br>A | 3<br>5<br>9<br>0           | Q146<br>26                | interleuk<br>in 11<br>receptor                                         | Sig<br>nal<br>ing | 46                    | 0<br>.<br>6           | 0<br>.<br>6                      | 6.<br>2<br>9<br>E           | 0.<br>01 |   | 1 | 1 | 0        | 20<br>18         | 2<br>0<br>1<br>8 |

|                                                 |                          |                 |                            |            |                                                             |                   |         |                       |                                 |                                  |          |  |   |   |   |          |                  |
|-------------------------------------------------|--------------------------|-----------------|----------------------------|------------|-------------------------------------------------------------|-------------------|---------|-----------------------|---------------------------------|----------------------------------|----------|--|---|---|---|----------|------------------|
| d<br>Ar<br>thr<br>itis                          | 87<br>3                  |                 |                            |            | subunit<br>alpha                                            |                   |         | 6<br>3                | 5<br>4                          | -<br>2<br>1                      |          |  |   |   |   |          |                  |
| Rh<br>eu<br>ma<br>toi<br>d<br>Ar<br>thr<br>itis | C<br>00<br>03<br>87<br>3 | IL1<br>2R<br>B1 | 3<br>5<br>9<br>4           | P4270<br>1 | interleuk<br>in 12<br>receptor<br>subunit<br>beta 1         | Sig<br>nal<br>ing | 11<br>8 | 0<br>.<br>5<br>5<br>5 | 0<br>.<br>7<br>3<br>1           | 9.<br>3<br>6<br>E<br>-<br>1<br>5 | 0.<br>01 |  | 0 | 1 | 0 | 20<br>05 | 2<br>0<br>0<br>5 |
| Rh<br>eu<br>ma<br>toi<br>d<br>Ar<br>thr<br>itis | C<br>00<br>03<br>87<br>3 | IL1<br>5R<br>A  | 3<br>6<br>0<br>1           | Q132<br>61 | interleukin 15<br>receptor<br>subunit alpha                 |                   | 72      | 0<br>.<br>6<br>0<br>3 | 0<br>.<br>7<br>6<br>9           | 2.<br>3<br>3<br>E<br>-<br>0<br>6 | 0.<br>01 |  | 1 | 1 | 0 | 20<br>19 | 2<br>0<br>1<br>9 |
| Rh<br>eu<br>ma<br>toi<br>d<br>Ar<br>thr<br>itis | C<br>00<br>03<br>87<br>3 | CY<br>CS<br>P52 | 3<br>6<br>0<br>1<br>5<br>5 |            | CYCS<br>pseudogene 52                                       |                   | 1       | 1                     | 0<br>.<br>1<br>1<br>5           |                                  | 0.<br>01 |  | 1 | 1 | 0 | 20<br>18 | 2<br>0<br>1<br>8 |
| Rh<br>eu<br>ma<br>toi<br>d<br>Ar<br>thr<br>itis | C<br>00<br>03<br>87<br>3 | INS             | 3<br>6<br>3<br>0           | P0130<br>8 | insulin                                                     |                   | 40<br>5 | 0<br>.<br>4<br>4<br>5 | 0<br>.<br>9<br>2<br>3           | 0.<br>3<br>0<br>0<br>9<br>1      | 0.<br>01 |  | 1 | 1 | 0 | 20<br>06 | 2<br>0<br>0<br>6 |
| Rh<br>eu<br>ma<br>toi<br>d<br>Ar<br>thr<br>itis | C<br>00<br>03<br>87<br>3 | INP<br>P5<br>D  | 3<br>6<br>3<br>5           | Q928<br>35 | inositol<br>polyphosphate<br>-5-<br>phosphatase D           |                   | 10<br>9 | 0<br>.<br>5<br>5<br>8 | 0<br>.<br>7<br>3<br>1<br>9<br>8 | 0.<br>9<br>7<br>1<br>9<br>8      | 0.<br>01 |  | 1 | 1 | 0 | 20<br>11 | 2<br>0<br>1<br>1 |
| Rh<br>eu<br>ma<br>toi<br>d<br>Ar<br>thr<br>itis | C<br>00<br>03<br>87<br>3 | IR<br>AK<br>2   | 3<br>6<br>5<br>6           | O431<br>87 | interleuk<br>in 1<br>receptor<br>associat<br>ed<br>kinase 2 | Ki<br>nas<br>e    | 22      | 0<br>.<br>7<br>2<br>2 | 0<br>.<br>3<br>8<br>5           | 2.<br>6<br>1<br>E<br>-<br>1<br>9 | 0.<br>01 |  | 1 | 1 | 2 | 20<br>18 | 2<br>0<br>1<br>8 |
| Rh<br>eu                                        | C<br>00<br>3             | IRF<br>3        | 3<br>6                     | Q146<br>53 | interfero<br>n                                              | Tr<br>ans         | 17<br>4 | 0<br>.<br>.           | 0<br>.<br>.                     | 0.<br>0                          | 0.<br>01 |  | 1 | 1 | 0 | 20<br>07 | 2<br>0           |

|                         |          |        |      |        |                                             |                      |     |       |       |          |      |  |   |   |   |      |      |
|-------------------------|----------|--------|------|--------|---------------------------------------------|----------------------|-----|-------|-------|----------|------|--|---|---|---|------|------|
| matoid<br>Arthritis     | 03873    |        | 61   |        | regulatory factor 3                         | cription factor      |     | 517   | 808   | 00116    |      |  |   |   |   |      | 07   |
| Rheumatoid<br>Arthritis | C0003873 | ISL1   | 3670 | P61371 | ISL LIM homeobox 1                          | Transcription factor | 94  | 0.579 | 0.654 | 0.86857  | 0.01 |  | 1 | 1 | 0 | 2015 | 2015 |
| Rheumatoid<br>Arthritis | C0003873 | ITGA2B | 3674 | P08514 | integrin subunit alpha 2b                   |                      | 215 | 0.493 | 0.692 | 1.52E-16 | 0.01 |  | 1 | 1 | 0 | 1990 | 1990 |
| Rheumatoid<br>Arthritis | C0003873 | ITGA5  | 3678 | P08648 | integrin subunit alpha 5                    |                      | 145 | 0.524 | 0.769 | 0.4255   | 0.01 |  | 1 | 1 | 0 | 2017 | 2017 |
| Rheumatoid<br>Arthritis | C0003873 | ITGA9  | 3680 | Q13797 | integrin subunit alpha 9                    |                      | 62  | 0.621 | 0.692 | 0.008158 | 0.01 |  | 1 | 1 | 0 | 2017 | 2017 |
| Rheumatoid<br>Arthritis | C0003873 | ITIH1  | 3697 | P19827 | inter-alpha-trypsin inhibitor heavy chain 1 | Enzyme modulator     | 38  | 0.691 | 0.462 | 2.08E-31 | 0.01 |  | 1 | 1 | 0 | 2017 | 2017 |
| Rheumatoid<br>Arthritis | C0003873 | ITIH4  | 3700 | Q14624 | inter-alpha-trypsin inhibitor heavy chain 4 | Enzyme modulator     | 129 | 0.559 | 0.769 | 6.44E-13 | 0.01 |  | 1 | 1 | 0 | 2018 | 2018 |

|                      |          |         |        |        |                                                      |             |     |       |       |          |      |  |   |   |   |      |      |
|----------------------|----------|---------|--------|--------|------------------------------------------------------|-------------|-----|-------|-------|----------|------|--|---|---|---|------|------|
| Rheumatoid Arthritis | C0003873 | ITP R2  | 3709   | Q14571 | inositol 1,4,5-trisphosphate receptor type 2         | Ion channel | 55  | 0.631 | 0.654 | 5.71E-29 | 0.01 |  | 1 | 1 | 0 | 2007 | 2007 |
| Rheumatoid Arthritis | C0003873 | CD82    | 3732   | P27701 | CD82 molecule                                        |             | 172 | 0.507 | 0.731 | 1.27E-08 | 0.01 |  | 1 | 1 | 0 | 2007 | 2007 |
| Rheumatoid Arthritis | C0003873 | KCNA4   | 3739   | P22459 | potassium voltage-gated channel subfamily A member 4 | Ion channel | 28  | 0.716 | 0.423 | 0.9827   | 0.01 |  | 1 | 1 | 0 | 2019 | 2019 |
| Rheumatoid Arthritis | C0003873 | MIA3    | 375056 | Q5JRA6 | MIA domain export factor 3                           | SH3 ER      | 27  | 0.716 | 0.423 | 0.0375   | 0.01 |  | 1 | 1 | 1 | 2012 | 2012 |
| Rheumatoid Arthritis | C0003873 | ENHO    | 375704 | Q6UWT2 | energy homeostasis associated                        |             | 71  | 0.599 | 0.769 | 0.1026   | 0.01 |  | 1 | 1 | 0 | 2018 | 2018 |
| Rheumatoid Arthritis | C0003873 | KCNQ1   | 3784   | P51787 | potassium voltage-gated channel subfamily Q member 1 | Ion channel | 281 | 0.485 | 0.769 | 4.55E-08 | 0.01 |  | 1 | 1 | 1 | 2018 | 2018 |
| Rheumatoid           | C0003    | PICSA R | 3788   |        | P38 inhibited cutaneous squamous cell carcinoma      |             | 11  | 0.8   | 0.3   |          | 0.01 |  | 1 | 1 | 0 | 2019 | 2019 |



|                                                 |                          |                     |                  |            |                                                                                                                               |                      |         |                       |                       |                        |          |  |   |   |   |          |                  |
|-------------------------------------------------|--------------------------|---------------------|------------------|------------|-------------------------------------------------------------------------------------------------------------------------------|----------------------|---------|-----------------------|-----------------------|------------------------|----------|--|---|---|---|----------|------------------|
| d<br>Ar<br>thr<br>itis                          | 87<br>3                  |                     | 2<br>5           |            | associated<br>lincRNA                                                                                                         |                      |         | 2<br>1                | 0<br>8                |                        |          |  |   |   |   |          |                  |
| Rh<br>eu<br>ma<br>toi<br>d<br>Ar<br>thr<br>itis | C<br>00<br>03<br>87<br>3 | KI<br>R2<br>DS<br>3 | 3<br>8<br>0<br>8 | Q149<br>52 | killer<br>cell<br>immuno<br>globulin<br>like<br>receptor,<br>two Ig<br>domains<br>and<br>short<br>cytoplas<br>mic tail<br>3   | Re<br>ce<br>pto<br>r | 20      | 0<br>.<br>7<br>1<br>6 | 0<br>.<br>4<br>2<br>3 |                        | 0.<br>01 |  | 1 | 1 | 0 | 20<br>14 | 2<br>0<br>1<br>4 |
| Rh<br>eu<br>ma<br>toi<br>d<br>Ar<br>thr<br>itis | C<br>00<br>03<br>87<br>3 | KI<br>R2<br>DS<br>4 | 3<br>8<br>0<br>9 | P4363<br>2 | killer<br>cell<br>immuno<br>globulin<br>like<br>receptor,<br>two Ig<br>domains<br>and<br>short<br>cytoplas<br>mic tail<br>4   | Re<br>ce<br>pto<br>r | 30      | 0<br>.<br>6<br>7<br>4 | 0<br>.<br>5           |                        | 0.<br>01 |  | 1 | 1 | 0 | 20<br>06 | 2<br>0<br>0<br>6 |
| Rh<br>eu<br>ma<br>toi<br>d<br>Ar<br>thr<br>itis | C<br>00<br>03<br>87<br>3 | KI<br>R3<br>DS<br>1 | 3<br>8<br>1<br>3 | Q149<br>43 | killer<br>cell<br>immuno<br>globulin<br>like<br>receptor,<br>three Ig<br>domains<br>and<br>short<br>cytoplas<br>mic tail<br>1 | Re<br>ce<br>pto<br>r | 57      | 0<br>.<br>6<br>1<br>7 | 0<br>.<br>6<br>9<br>2 |                        | 0.<br>01 |  | 1 | 1 | 0 | 20<br>14 | 2<br>0<br>1<br>4 |
| Rh<br>eu<br>ma<br>toi<br>d<br>Ar<br>thr<br>itis | C<br>00<br>03<br>87<br>3 | KI<br>T             | 3<br>8<br>1<br>5 | P1072<br>1 | KIT<br>proto-<br>oncogen<br>e,<br>receptor<br>tyrosine<br>kinase                                                              | Ki<br>nas<br>e       | 71<br>5 | 0<br>.<br>3<br>6<br>6 | 0<br>.<br>8<br>0<br>8 | 0.<br>9<br>8<br>8<br>7 | 0.<br>01 |  | 1 | 1 | 0 | 20<br>20 | 2<br>0<br>2<br>0 |
| Rh<br>eu<br>ma                                  | C<br>00<br>03            | KP<br>NA<br>2       | 3<br>8           | P5229<br>2 | karyoph<br>erin                                                                                                               | Tr<br>ans            | 79      | 0<br>.<br>5           | 0<br>.<br>6           | 0.<br>5<br>4           | 0.<br>01 |  | 1 | 1 | 0 | 20<br>15 | 2<br>0           |

|                                                 |                          |                      |                  |            |                                      |                |         |                       |                            |                                  |          |  |   |   |   |          |                  |
|-------------------------------------------------|--------------------------|----------------------|------------------|------------|--------------------------------------|----------------|---------|-----------------------|----------------------------|----------------------------------|----------|--|---|---|---|----------|------------------|
| to<br>id<br>Ar<br>thr<br>itis                   | 87<br>3                  |                      | 3<br>8           |            | subunit<br>alpha 2                   | por<br>ter     |         | 8<br>8                | 5<br>4                     | 1<br>3<br>3                      |          |  |   |   |   |          | 1<br>5           |
| Rh<br>eu<br>ma<br>toi<br>d<br>Ar<br>thr<br>itis | C<br>00<br>03<br>87<br>3 | AR<br>G2             | 3<br>8<br>4      | P7854<br>0 | arginase<br>2                        | En<br>zy<br>me | 10<br>3 | 0<br>.<br>5<br>6<br>9 | 0<br>.<br>7<br>3<br>1      | 0.<br>0<br>0<br>1<br>8<br>2      | 0.<br>01 |  | 1 | 1 | 0 | 20<br>02 | 2<br>0<br>0<br>2 |
| Rh<br>eu<br>ma<br>toi<br>d<br>Ar<br>thr<br>itis | C<br>00<br>03<br>87<br>3 | KR<br>TA<br>P5-<br>9 | 3<br>8<br>4<br>6 | P2637<br>1 | keratin<br>associated<br>protein 5-9 |                | 2       | 0<br>.<br>9<br>3<br>1 | 0<br>.<br>1<br>1<br>4<br>5 | 0.<br>0<br>1<br>4<br>9<br>8<br>1 | 0.<br>01 |  | 1 | 1 | 0 | 20<br>11 | 2<br>0<br>1<br>1 |
| Rh<br>eu<br>ma<br>toi<br>d<br>Ar<br>thr<br>itis | C<br>00<br>03<br>87<br>3 | KR<br>T5             | 3<br>8<br>5<br>2 | P1364<br>7 | keratin 5                            |                | 20<br>3 | 0<br>.<br>5<br>1<br>2 | 0<br>.<br>7<br>3<br>1      | 0.<br>6<br>4<br>1<br>7<br>2      | 0.<br>01 |  | 1 | 1 | 0 | 20<br>17 | 2<br>0<br>1<br>7 |
| Rh<br>eu<br>ma<br>toi<br>d<br>Ar<br>thr<br>itis | C<br>00<br>03<br>87<br>3 | KR<br>T7             | 3<br>8<br>5<br>5 | P0872<br>9 | keratin 7                            |                | 28<br>7 | 0<br>.<br>4<br>6<br>3 | 0<br>.<br>8<br>0<br>8      | 3.<br>0<br>9<br>E<br>-<br>1<br>2 | 0.<br>01 |  | 1 | 1 | 0 | 20<br>04 | 2<br>0<br>0<br>4 |
| Rh<br>eu<br>ma<br>toi<br>d<br>Ar<br>thr<br>itis | C<br>00<br>03<br>87<br>3 | KR<br>T8             | 3<br>8<br>5<br>6 | P0578<br>7 | keratin 8                            |                | 16<br>6 | 0<br>.<br>5<br>1<br>7 | 0<br>.<br>6<br>5<br>4      | 2.<br>3<br>6<br>E<br>-<br>0<br>8 | 0.<br>01 |  | 1 | 1 | 0 | 20<br>15 | 2<br>0<br>1<br>5 |
| Rh<br>eu<br>ma<br>toi<br>d<br>Ar<br>thr<br>itis | C<br>00<br>03<br>87<br>3 | KR<br>T13            | 3<br>8<br>6<br>0 | P1364<br>6 | keratin 13                           |                | 53      | 0<br>.<br>6<br>3<br>1 | 0<br>.<br>6<br>9<br>2      | 0.<br>0<br>0<br>0<br>6<br>4<br>1 | 0.<br>01 |  | 1 | 1 | 0 | 20<br>17 | 2<br>0<br>1<br>7 |

|                      |          |         |        |        |                                                     |                  |     |       |       |          |      |  |   |   |   |      |      |
|----------------------|----------|---------|--------|--------|-----------------------------------------------------|------------------|-----|-------|-------|----------|------|--|---|---|---|------|------|
| Rheumatoid Arthritis | C0003873 | KRT16   | 3868   | P08779 | keratin 16                                          |                  | 97  | 0.565 | 0.769 | 1.5E-14  | 0.01 |  | 1 | 1 | 0 | 2001 | 2001 |
| Rheumatoid Arthritis | C0003873 | THESIS  | 387357 | Q8N1K5 | thymocyte selection associated                      |                  | 32  | 0.682 | 0.654 | 1.96E-06 | 0.01 |  | 1 | 1 | 0 | 2017 | 2017 |
| Rheumatoid Arthritis | C0003873 | RTL1    | 388015 | A6NKG5 | retrotransposon Gag like 1                          |                  | 119 | 0.554 | 0.808 | 0.005614 | 0.01 |  | 1 | 1 | 0 | 2018 | 2018 |
| Rheumatoid Arthritis | C0003873 | LAG3    | 3902   | P18627 | lymphocyte activating 3                             | Receptor         | 154 | 0.517 | 0.692 | 0.027623 | 0.01 |  | 1 | 1 | 0 | 2017 | 2017 |
| Rheumatoid Arthritis | C0003873 | LAIR2   | 3904   | Q6IS4  | leukocyte associated immunoglobulin like receptor 2 | Receptor         | 12  | 0.78  | 0.269 | 2.6E-07  | 0.01 |  | 1 | 1 | 0 | 2008 | 2008 |
| Rheumatoid Arthritis | C0003873 | LA3     | 3909   | Q16787 | laminin subunit alpha 3                             | Enzyme modulator | 110 | 0.576 | 0.731 | 8.83E-46 | 0.01 |  | 1 | 1 | 0 | 2017 | 2017 |
| Rheumatoid           | C0003873 | RPS12P4 | 3913   |        | ribosomal protein S12 pseudogene 4                  |                  | 1   | 1     | 0.15  |          | 0.01 |  | 1 | 1 | 0 | 2011 | 2011 |

|                                                 |                          |                |                  |            |                                                                    |                   |         |                       |                       |                                  |          |  |   |   |   |          |                  |
|-------------------------------------------------|--------------------------|----------------|------------------|------------|--------------------------------------------------------------------|-------------------|---------|-----------------------|-----------------------|----------------------------------|----------|--|---|---|---|----------|------------------|
| Ar<br>thr<br>itis                               |                          |                | 7<br>0           |            |                                                                    |                   |         |                       |                       |                                  |          |  |   |   |   |          |                  |
| Rh<br>eu<br>ma<br>toi<br>d<br>Ar<br>thr<br>itis | C<br>00<br>03<br>87<br>3 | LB<br>R        | 3<br>9<br>3<br>0 | Q147<br>39 | lamin B<br>receptor                                                | En<br>zy<br>me    | 30<br>7 | 0<br>.<br>4<br>7<br>3 | 0<br>.<br>8<br>0<br>8 | 0.<br>1<br>8<br>1<br>4<br>3      | 0.<br>01 |  | 1 | 1 | 0 | 20<br>19 | 2<br>0<br>1<br>9 |
| Rh<br>eu<br>ma<br>toi<br>d<br>Ar<br>thr<br>itis | C<br>00<br>03<br>87<br>3 | LC<br>AT       | 3<br>9<br>3<br>1 | P0418<br>0 | lecithin-<br>choleste<br>rol<br>acyltran<br>sferase                | En<br>zy<br>me    | 94      | 0<br>.<br>5<br>8<br>8 | 0<br>.<br>6<br>5<br>4 | 0.<br>0<br>8<br>1<br>0<br>2      | 0.<br>01 |  | 1 | 1 | 0 | 20<br>03 | 2<br>0<br>0<br>3 |
| Rh<br>eu<br>ma<br>toi<br>d<br>Ar<br>thr<br>itis | C<br>00<br>03<br>87<br>3 | LC<br>K        | 3<br>9<br>3<br>2 | P0623<br>9 | LCK<br>proto-<br>oncogen<br>e, Src<br>family<br>tyrosine<br>kinase | Ki<br>nas<br>e    | 10<br>3 | 0<br>.<br>5<br>6<br>4 | 0<br>.<br>7<br>6<br>9 | 0.<br>9<br>9<br>2<br>6           | 0.<br>01 |  | 1 | 1 | 0 | 20<br>17 | 2<br>0<br>1<br>7 |
| Rh<br>eu<br>ma<br>toi<br>d<br>Ar<br>thr<br>itis | C<br>00<br>03<br>87<br>3 | LE<br>CT<br>2  | 3<br>9<br>5<br>0 | O149<br>60 | leukocyt<br>e cell<br>derived<br>chemota<br>xin 2                  | Sig<br>nal<br>ing | 47      | 0<br>.<br>6<br>5<br>3 | 0<br>.<br>5<br>0      | 0.<br>0<br>1<br>4<br>8<br>1      | 0.<br>01 |  | 1 | 1 | 1 | 20<br>05 | 2<br>0<br>0<br>5 |
| Rh<br>eu<br>ma<br>toi<br>d<br>Ar<br>thr<br>itis | C<br>00<br>03<br>87<br>3 | LIF<br>R       | 3<br>9<br>7<br>7 | P4270<br>2 | LIF<br>receptor<br>subunit<br>alpha                                | Sig<br>nal<br>ing | 19<br>8 | 0<br>.<br>5<br>2<br>3 | 0<br>.<br>8<br>0<br>8 | 1.<br>4<br>9<br>E<br>-<br>1<br>3 | 0.<br>01 |  | 1 | 1 | 0 | 20<br>18 | 2<br>0<br>1<br>8 |
| Rh<br>eu<br>ma<br>toi<br>d<br>Ar<br>thr<br>itis | C<br>00<br>03<br>87<br>3 | LN<br>PE<br>P  | 4<br>0<br>1<br>2 | Q9UI<br>Q6 | leucyl<br>and<br>cystinyl<br>aminope<br>ptidase                    | En<br>zy<br>me    | 17<br>4 | 0<br>.<br>5<br>1<br>4 | 0<br>.<br>7<br>3<br>1 | 0.<br>9<br>9<br>5<br>7           | 0.<br>01 |  | 1 | 1 | 0 | 19<br>92 | 1<br>9<br>9<br>2 |
| Rh<br>eu<br>ma                                  | C<br>00<br>03            | SA<br>PC<br>D1 | 4<br>0<br>1      | Q5SS<br>Q6 | suppressor<br>APC domain<br>containing 1                           |                   | 2       | 0<br>.<br>9           | 0<br>.<br>1           | 1.<br>8<br>1                     | 0.<br>01 |  | 1 | 1 | 0 | 20<br>11 | 2<br>0           |

|                                                 |                          |               |                            |            |                                                                                                              |         |                       |                       |                                  |          |  |   |   |   |          |                  |
|-------------------------------------------------|--------------------------|---------------|----------------------------|------------|--------------------------------------------------------------------------------------------------------------|---------|-----------------------|-----------------------|----------------------------------|----------|--|---|---|---|----------|------------------|
| to<br>id<br>Ar<br>thr<br>itis                   | 87<br>3                  |               | 2<br>5<br>1                |            |                                                                                                              |         | 3<br>1                | 5<br>4                | E<br>-<br>0<br>7                 |          |  |   |   |   |          | 1<br>1           |
| Rh<br>eu<br>ma<br>toi<br>d<br>Ar<br>thr<br>itis | C<br>00<br>03<br>87<br>3 | CR<br>IP3     | 4<br>0<br>1<br>2<br>6<br>2 | Q6Q6<br>R5 | cysteine rich<br>protein 3                                                                                   | 17      | 0<br>.<br>8<br>0<br>5 | 0<br>.<br>3<br>0<br>8 | 0.<br>0<br>0<br>6<br>4<br>8      | 0.<br>01 |  | 1 | 1 | 0 | 20<br>17 | 2<br>0<br>1<br>7 |
| Rh<br>eu<br>ma<br>toi<br>d<br>Ar<br>thr<br>itis | C<br>00<br>03<br>87<br>3 | LO<br>XL<br>2 | 4<br>0<br>1<br>7           | Q9Y4<br>K0 | lysyl oxidase<br>like 2                                                                                      | 14<br>9 | 0<br>.<br>5<br>2<br>7 | 0<br>.<br>7<br>3<br>1 | 3.<br>3<br>8<br>E<br>-<br>0<br>7 | 0.<br>01 |  | 1 | 1 | 0 | 20<br>18 | 2<br>0<br>1<br>8 |
| Rh<br>eu<br>ma<br>toi<br>d<br>Ar<br>thr<br>itis | C<br>00<br>03<br>87<br>3 | LE<br>RF<br>S | 4<br>0<br>3<br>3<br>2<br>3 |            | lncRNA<br>negative<br>regulator of<br>fibroblast-like<br>synoviocyte<br>migration,<br>SYNCRIP<br>interacting | 1       | 1                     | 0<br>.<br>1<br>1<br>5 |                                  | 0.<br>01 |  | 1 | 1 | 0 | 20<br>18 | 2<br>0<br>1<br>8 |
| Rh<br>eu<br>ma<br>toi<br>d<br>Ar<br>thr<br>itis | C<br>00<br>03<br>87<br>3 | LR<br>P1      | 4<br>0<br>3<br>5           | Q079<br>54 | LDL receptor<br>related protein<br>1                                                                         | 25<br>2 | 0<br>.<br>4<br>8<br>2 | 0<br>.<br>7<br>6<br>9 | 1                                | 0.<br>01 |  | 1 | 1 | 0 | 20<br>08 | 2<br>0<br>0<br>8 |
| Rh<br>eu<br>ma<br>toi<br>d<br>Ar<br>thr<br>itis | C<br>00<br>03<br>87<br>3 | LR<br>P2      | 4<br>0<br>3<br>6           | P9816<br>4 | LDL receptor<br>related protein<br>2                                                                         | 25<br>4 | 0<br>.<br>4<br>9<br>1 | 0<br>.<br>8<br>4<br>6 | 0.<br>9<br>9<br>9<br>9           | 0.<br>01 |  | 1 | 1 | 0 | 20<br>03 | 2<br>0<br>0<br>3 |
| Rh<br>eu<br>ma<br>toi<br>d<br>Ar<br>thr<br>itis | C<br>00<br>03<br>87<br>3 | LR<br>P6      | 4<br>0<br>4<br>0           | O755<br>81 | LDL receptor<br>related protein<br>6                                                                         | 13<br>4 | 0<br>.<br>5<br>3<br>6 | 0<br>.<br>8<br>0<br>8 | 0.<br>6<br>9<br>6<br>4           | 0.<br>01 |  | 1 | 1 | 0 | 20<br>14 | 2<br>0<br>1<br>4 |

|                      |          |             |        |        |                               |     |       |       |          |      |  |   |   |   |      |      |
|----------------------|----------|-------------|--------|--------|-------------------------------|-----|-------|-------|----------|------|--|---|---|---|------|------|
| Rheumatoid Arthritis | C0003873 | LS P1       | 4046   | P33241 | lymphocyte specific protein 1 | 41  | 0.7   | 0.462 | 1.47E-06 | 0.01 |  | 1 | 1 | 0 | 2015 | 2015 |
| Rheumatoid Arthritis | C0003873 | LT BR       | 4055   | P36941 | lymphotoxin beta receptor     | 78  | 0.592 | 0.692 | 0.3058   | 0.01 |  | 1 | 1 | 0 | 2008 | 2008 |
| Rheumatoid Arthritis | C0003873 | MI RL ET 7B | 406884 |        | microRNA let-7b               | 186 | 0.493 | 0.769 |          | 0.01 |  | 1 | 1 | 0 | 2016 | 2016 |
| Rheumatoid Arthritis | C0003873 | MI R1 06 A  | 406899 |        | microRNA 106a                 | 140 | 0.524 | 0.846 |          | 0.01 |  | 1 | 1 | 0 | 2018 | 2018 |
| Rheumatoid Arthritis | C0003873 | LY Z        | 4069   | P61626 | lysozyme                      | 178 | 0.526 | 0.846 | 3.41E-06 | 0.01 |  | 1 | 1 | 0 | 1989 | 1989 |
| Rheumatoid Arthritis | C0003873 | MI R1 25 A  | 406910 |        | microRNA 125a                 | 225 | 0.489 | 0.769 |          | 0.01 |  | 1 | 1 | 0 | 2019 | 2019 |
| Rheumatoid Ar        | C0003873 | MI R1 37    | 406928 |        | microRNA 137                  | 171 | 0.513 | 0.846 |          | 0.01 |  | 1 | 1 | 0 | 2018 | 2018 |

|                                                 |                          |                     |                            |  |                  |         |                       |                       |  |          |  |   |   |   |          |                  |
|-------------------------------------------------|--------------------------|---------------------|----------------------------|--|------------------|---------|-----------------------|-----------------------|--|----------|--|---|---|---|----------|------------------|
| thr<br>itis                                     |                          |                     |                            |  |                  |         |                       |                       |  |          |  |   |   |   |          |                  |
| Rh<br>eu<br>ma<br>toi<br>d<br>Ar<br>thr<br>itis | C<br>00<br>03<br>87<br>3 | MI<br>R1<br>41      | 4<br>0<br>6<br>9<br>3<br>3 |  | microRNA<br>141  | 17<br>9 | 0<br>.<br>4<br>9<br>7 | 0<br>.<br>8<br>0<br>8 |  | 0.<br>01 |  | 1 | 1 | 0 | 20<br>19 | 2<br>0<br>1<br>9 |
| Rh<br>eu<br>ma<br>toi<br>d<br>Ar<br>thr<br>itis | C<br>00<br>03<br>87<br>3 | MI<br>R1<br>42      | 4<br>0<br>6<br>9<br>3<br>4 |  | microRNA<br>142  | 22<br>0 | 0<br>.<br>4<br>8      | 0<br>.<br>8<br>4<br>6 |  | 0.<br>01 |  | 1 | 1 | 0 | 20<br>19 | 2<br>0<br>1<br>9 |
| Rh<br>eu<br>ma<br>toi<br>d<br>Ar<br>thr<br>itis | C<br>00<br>03<br>87<br>3 | MI<br>R1<br>47<br>A | 4<br>0<br>6<br>9<br>3<br>9 |  | microRNA<br>147a | 21      | 0<br>.<br>7<br>1<br>6 | 0<br>.<br>4<br>2<br>3 |  | 0.<br>01 |  | 1 | 1 | 0 | 20<br>19 | 2<br>0<br>1<br>9 |
| Rh<br>eu<br>ma<br>toi<br>d<br>Ar<br>thr<br>itis | C<br>00<br>03<br>87<br>3 | MI<br>R1<br>50      | 4<br>0<br>6<br>9<br>4<br>2 |  | microRNA<br>150  | 28<br>2 | 0<br>.<br>4<br>5<br>5 | 0<br>.<br>8<br>0<br>8 |  | 0.<br>01 |  | 1 | 1 | 0 | 20<br>18 | 2<br>0<br>1<br>8 |
| Rh<br>eu<br>ma<br>toi<br>d<br>Ar<br>thr<br>itis | C<br>00<br>03<br>87<br>3 | MI<br>R1<br>6-1     | 4<br>0<br>6<br>9<br>5<br>0 |  | microRNA<br>16-1 | 57      | 0<br>.<br>6<br>2<br>3 | 0<br>.<br>5           |  | 0.<br>01 |  | 1 | 1 | 0 | 20<br>08 | 2<br>0<br>0<br>8 |
| Rh<br>eu<br>ma<br>toi<br>d<br>Ar<br>thr<br>itis | C<br>00<br>03<br>87<br>3 | MI<br>R1<br>8A      | 4<br>0<br>6<br>9<br>5<br>3 |  | microRNA<br>18a  | 15<br>4 | 0<br>.<br>5<br>2      | 0<br>.<br>8<br>4<br>6 |  | 0.<br>01 |  | 1 | 1 | 0 | 20<br>13 | 2<br>0<br>1<br>3 |
| Rh<br>eu<br>ma<br>toi                           | C<br>00<br>03            | MI<br>R1<br>82      | 4<br>0<br>6<br>9           |  | microRNA<br>182  | 21<br>1 | 0<br>.<br>4           | 0<br>.<br>8           |  | 0.<br>01 |  | 1 | 1 | 0 | 20<br>18 | 2<br>0<br>1<br>8 |

|                                                 |                          |                      |                            |  |                    |         |                       |                       |  |          |  |   |   |   |          |                  |
|-------------------------------------------------|--------------------------|----------------------|----------------------------|--|--------------------|---------|-----------------------|-----------------------|--|----------|--|---|---|---|----------|------------------|
| d<br>Ar<br>thr<br>itis                          | 87<br>3                  |                      | 5<br>8                     |  |                    |         | 8<br>6                | 4<br>6                |  |          |  |   |   |   |          |                  |
| Rh<br>eu<br>ma<br>toi<br>d<br>Ar<br>thr<br>itis | C<br>00<br>03<br>87<br>3 | MI<br>R1<br>83       | 4<br>0<br>6<br>9<br>5<br>9 |  | microRNA<br>183    | 19<br>0 | 0<br>.<br>4<br>9<br>4 | 0<br>.<br>8<br>8<br>5 |  | 0.<br>01 |  | 1 | 1 | 0 | 20<br>17 | 2<br>0<br>1<br>7 |
| Rh<br>eu<br>ma<br>toi<br>d<br>Ar<br>thr<br>itis | C<br>00<br>03<br>87<br>3 | MI<br>R1<br>88       | 4<br>0<br>6<br>9<br>6<br>4 |  | microRNA<br>188    | 61      | 0<br>.<br>6<br>1<br>2 | 0<br>.<br>8<br>0<br>8 |  | 0.<br>01 |  | 1 | 1 | 0 | 20<br>15 | 2<br>0<br>1<br>5 |
| Rh<br>eu<br>ma<br>toi<br>d<br>Ar<br>thr<br>itis | C<br>00<br>03<br>87<br>3 | MI<br>R1<br>93<br>A  | 4<br>0<br>6<br>9<br>6<br>8 |  | microRNA<br>193a   | 11<br>6 | 0<br>.<br>5<br>4<br>1 | 0<br>.<br>7<br>3<br>1 |  | 0.<br>01 |  | 1 | 1 | 0 | 20<br>19 | 2<br>0<br>1<br>9 |
| Rh<br>eu<br>ma<br>toi<br>d<br>Ar<br>thr<br>itis | C<br>00<br>03<br>87<br>3 | MI<br>R1<br>96<br>A2 | 4<br>0<br>6<br>9<br>7<br>3 |  | microRNA<br>196a-2 | 70      | 0<br>.<br>5<br>9<br>9 | 0<br>.<br>5<br>7<br>7 |  | 0.<br>01 |  | 1 | 1 | 1 | 20<br>16 | 2<br>0<br>1<br>6 |
| Rh<br>eu<br>ma<br>toi<br>d<br>Ar<br>thr<br>itis | C<br>00<br>03<br>87<br>3 | MI<br>R1<br>99<br>A1 | 4<br>0<br>6<br>9<br>7<br>6 |  | microRNA<br>199a-1 | 87      | 0<br>.<br>5<br>7<br>8 | 0<br>.<br>5<br>7<br>7 |  | 0.<br>01 |  | 1 | 1 | 0 | 20<br>18 | 2<br>0<br>1<br>8 |
| Rh<br>eu<br>ma<br>toi<br>d<br>Ar<br>thr<br>itis | C<br>00<br>03<br>87<br>3 | MI<br>R1<br>99<br>A2 | 4<br>0<br>6<br>9<br>7<br>7 |  | microRNA<br>199a-2 | 87      | 0<br>.<br>5<br>7<br>8 | 0<br>.<br>5<br>7<br>7 |  | 0.<br>01 |  | 1 | 1 | 0 | 20<br>18 | 2<br>0<br>1<br>8 |



|                      |          |           |        |  |                 |     |       |       |  |      |  |   |   |   |      |      |
|----------------------|----------|-----------|--------|--|-----------------|-----|-------|-------|--|------|--|---|---|---|------|------|
| Rheumatoid Arthritis | C0003873 | MI R19A   | 406979 |  | microRNA 19a    | 151 | 0.512 | 0.808 |  | 0.01 |  | 1 | 1 | 0 | 2019 | 2019 |
| Rheumatoid Arthritis | C0003873 | MI R19B1  | 406980 |  | microRNA 19b-1  | 144 | 0.529 | 0.769 |  | 0.01 |  | 1 | 1 | 0 | 2012 | 2012 |
| Rheumatoid Arthritis | C0003873 | MI R200C  | 406985 |  | microRNA 200c   | 202 | 0.486 | 0.846 |  | 0.01 |  | 1 | 1 | 0 | 2017 | 2017 |
| Rheumatoid Arthritis | C0003873 | MI R203A  | 406986 |  | microRNA 203a   | 237 | 0.471 | 0.808 |  | 0.01 |  | 1 | 1 | 0 | 2011 | 2011 |
| Rheumatoid Arthritis | C0003873 | MI R204   | 406987 |  | microRNA 204    | 203 | 0.487 | 0.808 |  | 0.01 |  | 1 | 1 | 0 | 2018 | 2018 |
| Rheumatoid Arthritis | C0003873 | MI R212   | 406994 |  | microRNA 212    | 126 | 0.535 | 0.808 |  | 0.01 |  | 1 | 1 | 0 | 2018 | 2018 |
| Rheumatoid Ar        | C0003873 | MI R219A2 | 407003 |  | microRNA 219a-2 | 8   | 0.839 | 0.269 |  | 0.01 |  | 1 | 1 | 0 | 2015 | 2015 |

|                                                 |                          |                     |                            |  |                   |         |                       |                       |  |          |  |   |   |   |          |                  |
|-------------------------------------------------|--------------------------|---------------------|----------------------------|--|-------------------|---------|-----------------------|-----------------------|--|----------|--|---|---|---|----------|------------------|
| thr<br>itis                                     |                          |                     |                            |  |                   |         |                       |                       |  |          |  |   |   |   |          |                  |
| Rh<br>eu<br>ma<br>toi<br>d<br>Ar<br>thr<br>itis | C<br>00<br>03<br>87<br>3 | MI<br>R2<br>3A      | 4<br>0<br>7<br>0<br>1<br>0 |  | microRNA<br>23a   | 17<br>4 | 0<br>.<br>4<br>9<br>9 | 0<br>.<br>8<br>0<br>8 |  | 0.<br>01 |  | 1 | 1 | 0 | 20<br>17 | 2<br>0<br>1<br>7 |
| Rh<br>eu<br>ma<br>toi<br>d<br>Ar<br>thr<br>itis | C<br>00<br>03<br>87<br>3 | MI<br>R2<br>6B      | 4<br>0<br>7<br>0<br>1<br>7 |  | microRNA<br>26b   | 12<br>8 | 0<br>.<br>5<br>2<br>9 | 0<br>.<br>8<br>0<br>8 |  | 0.<br>01 |  | 1 | 1 | 0 | 20<br>15 | 2<br>0<br>1<br>5 |
| Rh<br>eu<br>ma<br>toi<br>d<br>Ar<br>thr<br>itis | C<br>00<br>03<br>87<br>3 | MI<br>R2<br>7B      | 4<br>0<br>7<br>0<br>1<br>9 |  | microRNA<br>27b   | 14<br>1 | 0<br>.<br>5<br>2<br>9 | 0<br>.<br>7<br>6<br>9 |  | 0.<br>01 |  | 1 | 1 | 0 | 20<br>19 | 2<br>0<br>1<br>9 |
| Rh<br>eu<br>ma<br>toi<br>d<br>Ar<br>thr<br>itis | C<br>00<br>03<br>87<br>3 | MI<br>R2<br>9B<br>1 | 4<br>0<br>7<br>0<br>2<br>4 |  | microRNA<br>29b-1 | 21<br>2 | 0<br>.<br>4<br>8<br>5 | 0<br>.<br>8<br>4<br>6 |  | 0.<br>01 |  | 1 | 1 | 0 | 20<br>19 | 2<br>0<br>1<br>9 |
| Rh<br>eu<br>ma<br>toi<br>d<br>Ar<br>thr<br>itis | C<br>00<br>03<br>87<br>3 | MI<br>R2<br>9B<br>2 | 4<br>0<br>7<br>0<br>2<br>5 |  | microRNA<br>29b-2 | 21<br>4 | 0<br>.<br>4<br>8<br>4 | 0<br>.<br>8<br>8<br>5 |  | 0.<br>01 |  | 1 | 1 | 0 | 20<br>19 | 2<br>0<br>1<br>9 |
| Rh<br>eu<br>ma<br>toi<br>d<br>Ar<br>thr<br>itis | C<br>00<br>03<br>87<br>3 | MI<br>R3<br>01<br>A | 4<br>0<br>7<br>0<br>2<br>7 |  | microRNA<br>301a  | 10<br>2 | 0<br>.<br>5<br>5<br>8 | 0<br>.<br>8<br>0<br>8 |  | 0.<br>01 |  | 1 | 1 | 0 | 20<br>16 | 2<br>0<br>1<br>6 |
| Rh<br>eu<br>ma<br>toi                           | C<br>00<br>03            | MI<br>R3<br>20<br>A | 4<br>0<br>7<br>0           |  | microRNA<br>320a  | 14<br>5 | 0<br>.<br>5           | 0<br>.<br>8           |  | 0.<br>01 |  | 1 | 1 | 0 | 20<br>19 | 2<br>0<br>1<br>9 |

|                                                 |                          |                |                            |  |                  |         |                       |                       |  |          |  |   |   |   |          |                  |
|-------------------------------------------------|--------------------------|----------------|----------------------------|--|------------------|---------|-----------------------|-----------------------|--|----------|--|---|---|---|----------|------------------|
| d<br>Ar<br>thr<br>itis                          | 87<br>3                  |                | 3<br>7                     |  |                  |         | 2<br>6                | 0<br>8                |  |          |  |   |   |   |          |                  |
| Rh<br>eu<br>ma<br>toi<br>d<br>Ar<br>thr<br>itis | C<br>00<br>03<br>87<br>3 | MI<br>R3<br>3A | 4<br>0<br>7<br>0<br>3<br>9 |  | microRNA<br>33a  | 10<br>0 | 0<br>.<br>5<br>6      | 0<br>.<br>6<br>5<br>4 |  | 0.<br>01 |  | 1 | 1 | 0 | 20<br>18 | 2<br>0<br>1<br>8 |
| Rh<br>eu<br>ma<br>toi<br>d<br>Ar<br>thr<br>itis | C<br>00<br>03<br>87<br>3 | MI<br>R3<br>4B | 4<br>0<br>7<br>0<br>4<br>1 |  | microRNA<br>34b  | 16<br>5 | 0<br>.<br>5<br>0<br>9 | 0<br>.<br>8<br>0<br>8 |  | 0.<br>01 |  | 1 | 1 | 0 | 20<br>14 | 2<br>0<br>1<br>4 |
| Rh<br>eu<br>ma<br>toi<br>d<br>Ar<br>thr<br>itis | C<br>00<br>03<br>87<br>3 | MI<br>R3<br>4C | 4<br>0<br>7<br>0<br>4<br>2 |  | microRNA<br>34c  | 13<br>1 | 0<br>.<br>5<br>4<br>1 | 0<br>.<br>8<br>8<br>5 |  | 0.<br>01 |  | 1 | 1 | 0 | 20<br>18 | 2<br>0<br>1<br>8 |
| Rh<br>eu<br>ma<br>toi<br>d<br>Ar<br>thr<br>itis | C<br>00<br>03<br>87<br>3 | MI<br>R7-<br>1 | 4<br>0<br>7<br>0<br>4<br>3 |  | microRNA 7-<br>1 | 52      | 0<br>.<br>6<br>2<br>8 | 0<br>.<br>6<br>9<br>2 |  | 0.<br>01 |  | 1 | 1 | 0 | 20<br>17 | 2<br>0<br>1<br>7 |
| Rh<br>eu<br>ma<br>toi<br>d<br>Ar<br>thr<br>itis | C<br>00<br>03<br>87<br>3 | MI<br>R7-<br>2 | 4<br>0<br>7<br>0<br>4<br>4 |  | microRNA 7-<br>2 | 54      | 0<br>.<br>6<br>2<br>3 | 0<br>.<br>6<br>9<br>2 |  | 0.<br>01 |  | 1 | 1 | 0 | 20<br>17 | 2<br>0<br>1<br>7 |
| Rh<br>eu<br>ma<br>toi<br>d<br>Ar<br>thr<br>itis | C<br>00<br>03<br>87<br>3 | MI<br>R7-<br>3 | 4<br>0<br>7<br>0<br>4<br>5 |  | microRNA 7-<br>3 | 53      | 0<br>.<br>6<br>2<br>6 | 0<br>.<br>6<br>9<br>2 |  | 0.<br>01 |  | 1 | 1 | 0 | 20<br>17 | 2<br>0<br>1<br>7 |

|                      |          |                   |        |        |                                                         |                      |     |       |         |         |      |  |   |   |   |      |      |
|----------------------|----------|-------------------|--------|--------|---------------------------------------------------------|----------------------|-----|-------|---------|---------|------|--|---|---|---|------|------|
| Rheumatoid Arthritis | C0003873 | MIR99B            | 407056 |        | microRNA 99b                                            |                      | 52  | 0.633 | 0.615   |         | 0.01 |  | 1 | 1 | 0 | 2020 | 2020 |
| Rheumatoid Arthritis | C0003873 | CAPRI N1          | 40776  | Q14444 | cell cycle associated protein 1                         | Transporter          | 29  | 0.691 | 0.57247 | 0.9747  | 0.01 |  | 1 | 1 | 0 | 2020 | 2020 |
| Rheumatoid Arthritis | C0003873 | TNFSF12 - TNFSF13 | 40777  | O43508 | TNFSF12-TNFSF13 readthrough                             |                      | 91  | 0.579 | 0.61957 | 0.797   | 0.01 |  | 1 | 1 | 0 | 2007 | 2007 |
| Rheumatoid Arthritis | C0003873 | ARRB1             | 4008   | P49407 | arrestin beta 1                                         | Enzyme modulator     | 92  | 0.588 | 0.84694 | 0.99394 | 0.01 |  | 1 | 1 | 0 | 2011 | 2011 |
| Rheumatoid Arthritis | C0003873 | MAA               | 4080   |        | microphthalmia or anophthalmia and associated anomalies |                      | 37  | 0.666 | 0.577   |         | 0.01 |  | 1 | 1 | 0 | 2019 | 2019 |
| Rheumatoid Arthritis | C0003873 | SMAD1             | 4086   | Q15797 | SMAD family member 1                                    | Transcription factor | 138 | 0.533 | 0.73103 | 0.98803 | 0.01 |  | 1 | 1 | 0 | 2018 | 2018 |
| Rheumatoid Ar        | C0003873 | ARRB2             | 4009   | P32121 | arrestin beta 2                                         | Enzyme modulator     | 119 | 0.561 | 0.769   | 0.50658 | 0.01 |  | 1 | 1 | 0 | 2019 | 2019 |

|                                                 |                          |                |                  |            |                                                           |                                                |         |                       |                       |                                  |          |  |   |   |   |          |                  |
|-------------------------------------------------|--------------------------|----------------|------------------|------------|-----------------------------------------------------------|------------------------------------------------|---------|-----------------------|-----------------------|----------------------------------|----------|--|---|---|---|----------|------------------|
| thr<br>itis                                     |                          |                |                  |            |                                                           | ato<br>r                                       |         |                       |                       |                                  |          |  |   |   |   |          |                  |
| Rh<br>eu<br>ma<br>toi<br>d<br>Ar<br>thr<br>itis | C<br>00<br>03<br>87<br>3 | ASI<br>C1      | 4<br>1           | P7834<br>8 | acid<br>sensing<br>ion<br>channel<br>subunit<br>1         | Ion<br>ch<br>an<br>nel                         | 52      | 0<br>.<br>6<br>5<br>3 | 0<br>.<br>6<br>1<br>5 | 0.<br>9<br>3<br>0<br>1<br>7      | 0.<br>01 |  | 1 | 1 | 0 | 20<br>14 | 2<br>0<br>1<br>4 |
| Rh<br>eu<br>ma<br>toi<br>d<br>Ar<br>thr<br>itis | C<br>00<br>03<br>87<br>3 | MA<br>L        | 4<br>1<br>1<br>8 | P2114<br>5 | mal, T<br>cell<br>different<br>iation<br>protein          | Tr<br>ans<br>por<br>ter                        | 10<br>2 | 0<br>.<br>5<br>7      | 0<br>.<br>5<br>7<br>7 | 0.<br>8<br>3<br>1<br>9<br>7      | 0.<br>01 |  | 1 | 1 | 0 | 20<br>08 | 2<br>0<br>0<br>8 |
| Rh<br>eu<br>ma<br>toi<br>d<br>Ar<br>thr<br>itis | C<br>00<br>03<br>87<br>3 | MA<br>PT       | 4<br>1<br>3<br>7 | P1063<br>6 | microtubule<br>associated<br>protein tau                  |                                                | 46<br>9 | 0<br>.<br>4<br>4<br>6 | 0<br>.<br>9<br>2<br>3 | 0.<br>0<br>6<br>0<br>2<br>6      | 0.<br>01 |  | 1 | 1 | 0 | 20<br>17 | 2<br>0<br>1<br>7 |
| Rh<br>eu<br>ma<br>toi<br>d<br>Ar<br>thr<br>itis | C<br>00<br>03<br>87<br>3 | MA<br>RK<br>1  | 4<br>1<br>3<br>9 | Q9P0<br>L2 | microtu<br>bule<br>affinity<br>regulatin<br>g kinase<br>1 | Ki<br>nas<br>e                                 | 40      | 0<br>.<br>6<br>6<br>3 | 0<br>.<br>5<br>7<br>7 | 0.<br>6<br>0<br>4<br>5           | 0.<br>01 |  | 1 | 1 | 0 | 20<br>19 | 2<br>0<br>1<br>9 |
| Rh<br>eu<br>ma<br>toi<br>d<br>Ar<br>thr<br>itis | C<br>00<br>03<br>87<br>3 | MB<br>NL<br>1  | 4<br>1<br>5<br>4 | Q9NR<br>56 | muscleb<br>lind like<br>splicing<br>regulato<br>r 1       | Nu<br>cle<br>ic<br>aci<br>d<br>bin<br>din<br>g | 52      | 0<br>.<br>6<br>5      | 0<br>.<br>6<br>1<br>5 | 0.<br>7<br>0<br>5<br>7<br>9      | 0.<br>01 |  | 1 | 1 | 0 | 20<br>18 | 2<br>0<br>1<br>8 |
| Rh<br>eu<br>ma<br>toi<br>d<br>Ar<br>thr<br>itis | C<br>00<br>03<br>87<br>3 | AD<br>AM<br>11 | 4<br>1<br>8<br>5 | O750<br>78 | ADAM<br>metallo<br>ptidase<br>domain<br>11                | En<br>zy<br>me                                 | 42      | 0<br>.<br>6<br>7      | 0<br>.<br>5<br>3<br>8 | 1.<br>0<br>4<br>E<br>-<br>0<br>5 | 0.<br>01 |  | 1 | 1 | 0 | 20<br>10 | 2<br>0<br>1<br>0 |
| Rh<br>eu<br>ma<br>toi                           | C<br>00<br>03            | MD<br>M4       | 4<br>1<br>9<br>4 | O151<br>51 | MDM4<br>regulato<br>r of p53                              | Nu<br>cle<br>ic<br>aci                         | 26<br>5 | 0<br>.<br>4           | 0<br>.<br>8           | 0.<br>9<br>9<br>9                | 0.<br>01 |  | 1 | 1 | 0 | 20<br>10 | 2<br>0<br>1<br>0 |

|                                                 |                          |                     |                  |            |                                                                                                           |                      |         |                       |                                      |                                  |          |  |   |   |   |          |                  |
|-------------------------------------------------|--------------------------|---------------------|------------------|------------|-----------------------------------------------------------------------------------------------------------|----------------------|---------|-----------------------|--------------------------------------|----------------------------------|----------|--|---|---|---|----------|------------------|
| d<br>Ar<br>thr<br>itis                          | 87<br>3                  |                     |                  |            |                                                                                                           | d<br>bin<br>din<br>g |         | 6<br>1                | 0<br>8                               | 9<br>2                           |          |  |   |   |   |          |                  |
| Rh<br>eu<br>ma<br>toi<br>d<br>Ar<br>thr<br>itis | C<br>00<br>03<br>87<br>3 | MA<br>P3<br>K3      | 4<br>2<br>1<br>5 | Q997<br>59 | mitogen<br>-<br>activate<br>d protein<br>kinase<br>kinase<br>kinase 3                                     | Ki<br>nas<br>e       | 57      | 0<br>.<br>6<br>2<br>6 | 0<br>.<br>6<br>9<br>2<br>5           | 0.<br>9<br>8<br>5<br>3<br>5      | 0.<br>01 |  | 1 | 1 | 0 | 20<br>04 | 2<br>0<br>0<br>4 |
| Rh<br>eu<br>ma<br>toi<br>d<br>Ar<br>thr<br>itis | C<br>00<br>03<br>87<br>3 | MG<br>AT<br>5       | 4<br>2<br>4<br>9 | Q093<br>28 | alpha-<br>1,6-<br>mannos<br>ylglycop<br>rotein 6-<br>beta-N-<br>acetylgl<br>ucosami<br>nyltransf<br>erase | En<br>zy<br>me       | 59      | 0<br>.<br>6<br>3<br>8 | 0<br>.<br>5<br>9<br>9<br>8           | 0.<br>9<br>9<br>8                | 0.<br>01 |  | 1 | 1 | 0 | 20<br>10 | 2<br>0<br>1<br>0 |
| Rh<br>eu<br>ma<br>toi<br>d<br>Ar<br>thr<br>itis | C<br>00<br>03<br>87<br>3 | KI<br>TL<br>G       | 4<br>2<br>5<br>4 | P2158<br>3 | KIT ligand                                                                                                |                      | 24<br>9 | 0<br>.<br>4<br>7<br>3 | 0<br>.<br>8<br>8<br>0<br>5           | 0.<br>8<br>5<br>0<br>2<br>4      | 0.<br>01 |  | 1 | 1 | 0 | 19<br>88 | 1<br>9<br>8<br>8 |
| Rh<br>eu<br>ma<br>toi<br>d<br>Ar<br>thr<br>itis | C<br>00<br>03<br>87<br>3 | AS<br>AH<br>1       | 4<br>2<br>7      | Q135<br>10 | N-<br>acylsphi<br>ngosine<br>amidohy<br>drolase 1                                                         | En<br>zy<br>me       | 17<br>6 | 0<br>.<br>5<br>2<br>6 | 0<br>.<br>8<br>0<br>8                | 1.<br>2<br>6<br>E<br>-<br>1<br>2 | 0.<br>01 |  | 1 | 1 | 0 | 20<br>16 | 2<br>0<br>1<br>6 |
| Rh<br>eu<br>ma<br>toi<br>d<br>Ar<br>thr<br>itis | C<br>00<br>03<br>87<br>3 | MI<br>TF            | 4<br>2<br>8<br>6 | O750<br>30 | melanocyte<br>inducing<br>transcription<br>factor                                                         |                      | 24<br>4 | 0<br>.<br>4<br>9<br>9 | 0<br>.<br>8<br>0<br>8                | 0.<br>9<br>8<br>1<br>1<br>9      | 0.<br>01 |  | 1 | 1 | 0 | 20<br>07 | 2<br>0<br>0<br>7 |
| Rh<br>eu<br>ma<br>toi<br>d<br>Ar<br>thr<br>itis | C<br>00<br>03<br>87<br>3 | MA<br>P3<br>K1<br>1 | 4<br>2<br>9<br>6 | Q165<br>84 | mitogen<br>-<br>activate<br>d protein<br>kinase<br>kinase<br>kinase<br>11                                 | Ki<br>nas<br>e       | 74      | 0<br>.<br>5<br>9<br>7 | 0<br>.<br>6<br>1<br>0<br>8<br>7<br>5 | 0.<br>0<br>1<br>0<br>8<br>7<br>5 | 0.<br>01 |  | 1 | 1 | 0 | 20<br>04 | 2<br>0<br>0<br>4 |

|                      |          |       |      |        |                                          |                      |     |       |        |          |      |  |   |   |   |      |      |
|----------------------|----------|-------|------|--------|------------------------------------------|----------------------|-----|-------|--------|----------|------|--|---|---|---|------|------|
| Rheumatoid Arthritis | C0003873 | KMT2A | 4297 | Q03164 | lysine methyltransferase 2A              |                      | 535 | 0.41  | 0.885  | 1        | 0.01 |  | 1 | 1 | 0 | 2012 | 2012 |
| Rheumatoid Arthritis | C0003873 | AF1   | 4299 | P51825 | AF4/FMR2 family member 1                 | Transcription factor | 49  | 0.659 | 0.423  | 0.71038  | 0.01 |  | 1 | 1 | 1 | 2018 | 2018 |
| Rheumatoid Arthritis | C0003873 | MP7   | 4316 | P09237 | matrix metalloproteinase 7               | Enzyme               | 320 | 0.446 | 0.885  | 1.04E-09 | 0.01 |  | 1 | 1 | 0 | 2007 | 2007 |
| Rheumatoid Arthritis | C0003873 | MP15  | 4324 | P51511 | matrix metalloproteinase 15              | Enzyme               | 54  | 0.644 | 0.5354 | 0.07354  | 0.01 |  | 1 | 1 | 0 | 1999 | 1999 |
| Rheumatoid Arthritis | C0003873 | MP16  | 4325 | P51512 | matrix metalloproteinase 16              | Enzyme               | 58  | 0.626 | 0.577  | 0.91797  | 0.01 |  | 0 | 1 | 0 | 2000 | 2000 |
| Rheumatoid Arthritis | C0003873 | MP17  | 4326 | Q9ULZ9 | matrix metalloproteinase 17              | Enzyme               | 30  | 0.705 | 0.38   | 2.2E-08  | 0.01 |  | 1 | 1 | 0 | 2000 | 2000 |
| Rheumatoid Ar        | C0003873 | MNAT1 | 4331 | P51948 | MNAT1 component of CDK activating kinase | Enzyme module        | 131 | 0.539 | 0.846  | 1.31E-   | 0.01 |  | 1 | 1 | 0 | 2015 | 2015 |

|                                                 |                          |                     |                            |            |                                                                     |                                       |         |                       |                                 |                                  |          |  |   |   |   |          |                  |
|-------------------------------------------------|--------------------------|---------------------|----------------------------|------------|---------------------------------------------------------------------|---------------------------------------|---------|-----------------------|---------------------------------|----------------------------------|----------|--|---|---|---|----------|------------------|
| thr<br>itis                                     |                          |                     |                            |            |                                                                     | ato<br>r                              |         |                       |                                 | 1<br>2                           |          |  |   |   |   |          |                  |
| Rh<br>eu<br>ma<br>toi<br>d<br>Ar<br>thr<br>itis | C<br>00<br>03<br>87<br>3 | MO<br>BP            | 4<br>3<br>3<br>6           | Q138<br>75 | myelin<br>associat<br>ed<br>oligoden<br>drocyte<br>basic<br>protein | Ce<br>llul<br>ar<br>str<br>uct<br>ure | 20      | 0<br>.<br>7           | 0<br>.<br>4<br>2<br>3           | 0.<br>5<br>4<br>6<br>2<br>3      | 0.<br>01 |  | 1 | 1 | 0 | 20<br>14 | 2<br>0<br>1<br>4 |
| Rh<br>eu<br>ma<br>toi<br>d<br>Ar<br>thr<br>itis | C<br>00<br>03<br>87<br>3 | MO<br>S             | 4<br>3<br>4<br>2           | P0054<br>0 | MOS<br>proto-<br>oncogen<br>e,<br>serine/th<br>reonine<br>kinase    | Ki<br>nas<br>e                        | 78      | 0<br>.<br>6<br>1<br>7 | 0<br>.<br>5<br>8<br>9<br>2<br>8 | 0.<br>5<br>8<br>9<br>2<br>8      | 0.<br>01 |  | 1 | 1 | 0 | 20<br>19 | 2<br>0<br>1<br>9 |
| Rh<br>eu<br>ma<br>toi<br>d<br>Ar<br>thr<br>itis | C<br>00<br>03<br>87<br>3 | MS                  | 4<br>3<br>9<br>7           |            | multiple<br>sclerosis                                               |                                       | 95      | 0<br>.<br>5<br>9<br>9 | 0<br>.<br>6<br>9<br>2           |                                  | 0.<br>01 |  | 1 | 1 | 0 | 20<br>10 | 2<br>0<br>1<br>0 |
| Rh<br>eu<br>ma<br>toi<br>d<br>Ar<br>thr<br>itis | C<br>00<br>03<br>87<br>3 | CC<br>DC<br>88<br>C | 4<br>4<br>0<br>1<br>9<br>3 | Q9P2<br>19 | coiled-coil<br>domain<br>containing<br>88C                          |                                       | 54      | 0<br>.<br>6<br>4<br>7 | 0<br>.<br>3<br>4<br>6           | 3.<br>3<br>E<br>-<br>0<br>8      | 0.<br>01 |  | 1 | 1 | 0 | 20<br>17 | 2<br>0<br>1<br>7 |
| Rh<br>eu<br>ma<br>toi<br>d<br>Ar<br>thr<br>itis | C<br>00<br>03<br>87<br>3 | CA<br>LH<br>M6      | 4<br>4<br>1<br>1<br>6<br>8 | Q5R3<br>K3 | calcium<br>homeostasis<br>modulator<br>family<br>member 6           |                                       | 7       | 0<br>.<br>8<br>9      | 0<br>.<br>1<br>9<br>2           | 0.<br>0<br>0<br>9<br>4<br>6<br>1 | 0.<br>01 |  | 1 | 1 | 0 | 20<br>16 | 2<br>0<br>1<br>6 |
| Rh<br>eu<br>ma<br>toi<br>d<br>Ar<br>thr<br>itis | C<br>00<br>03<br>87<br>3 | MI<br>R1<br>35<br>B | 4<br>4<br>2<br>8<br>9<br>1 |            | microRNA<br>135b                                                    |                                       | 11<br>1 | 0<br>.<br>5<br>5<br>4 | 0<br>.<br>7<br>3<br>1           |                                  | 0.<br>01 |  | 1 | 1 | 0 | 20<br>19 | 2<br>0<br>1<br>9 |
| Rh<br>eu<br>ma<br>toi                           | C<br>00<br>03            | MI<br>R1<br>48<br>B | 4<br>4<br>2<br>8           |            | microRNA<br>148b                                                    |                                       | 78      | 0<br>.<br>5           | 0<br>.<br>6                     |                                  | 0.<br>01 |  | 1 | 1 | 0 | 20<br>18 | 2<br>0<br>1<br>8 |



|                                                 |                          |          |                            |            |                                                                 |                                                |         |                       |                       |                                  |          |  |   |   |   |          |                  |
|-------------------------------------------------|--------------------------|----------|----------------------------|------------|-----------------------------------------------------------------|------------------------------------------------|---------|-----------------------|-----------------------|----------------------------------|----------|--|---|---|---|----------|------------------|
| d<br>Ar<br>thr<br>itis                          | 87<br>3                  |          | 9<br>2                     |            |                                                                 |                                                |         | 9<br>2                | 9<br>2                |                                  |          |  |   |   |   |          |                  |
| Rh<br>eu<br>ma<br>toi<br>d<br>Ar<br>thr<br>itis | C<br>00<br>03<br>87<br>3 | MS<br>D  | 4<br>4<br>3<br>4           |            | microcephaly<br>with spastic<br>diplegia<br>(Paine<br>syndrome) |                                                | 35      | 0<br>.<br>6<br>7<br>4 | 0<br>.<br>6<br>5<br>4 |                                  | 0.<br>01 |  | 1 | 1 | 0 | 20<br>18 | 2<br>0<br>1<br>8 |
| Rh<br>eu<br>ma<br>toi<br>d<br>Ar<br>thr<br>itis | C<br>00<br>03<br>87<br>3 | MS<br>H2 | 4<br>4<br>3<br>6           | P4324<br>6 | mutS<br>homolog<br>2                                            | Nu<br>cle<br>ic<br>aci<br>d<br>bin<br>din<br>g | 49<br>0 | 0<br>.<br>4<br>0<br>6 | 0<br>.<br>8<br>0<br>8 | 0.<br>8<br>9<br>5<br>3<br>9      | 0.<br>01 |  | 1 | 1 | 0 | 20<br>03 | 2<br>0<br>0<br>3 |
| Rh<br>eu<br>ma<br>toi<br>d<br>Ar<br>thr<br>itis | C<br>00<br>03<br>87<br>3 | MS<br>H3 | 4<br>4<br>3<br>7           | P2058<br>5 | mutS<br>homolog<br>3                                            | Nu<br>cle<br>ic<br>aci<br>d<br>bin<br>din<br>g | 24<br>5 | 0<br>.<br>4<br>7<br>4 | 0<br>.<br>7<br>6<br>9 | 7.<br>4<br>4<br>E<br>-<br>3<br>1 | 0.<br>01 |  | 1 | 1 | 0 | 20<br>03 | 2<br>0<br>0<br>3 |
| Rh<br>eu<br>ma<br>toi<br>d<br>Ar<br>thr<br>itis | C<br>00<br>03<br>87<br>3 | TA<br>RP | 4<br>4<br>5<br>3<br>4<br>7 |            | TCR gamma<br>alternate<br>reading frame<br>protein              |                                                | 44      | 0<br>.<br>6<br>3<br>8 | 0<br>.<br>5           |                                  | 0.<br>01 |  | 0 | 1 | 0 | 19<br>95 | 1<br>9<br>9<br>5 |
| Rh<br>eu<br>ma<br>toi<br>d<br>Ar<br>thr<br>itis | C<br>00<br>03<br>87<br>3 | MS<br>MB | 4<br>4<br>7<br>7           | P0811<br>8 | microse<br>minopro<br>tein beta                                 | Sig<br>nal<br>ing                              | 19<br>5 | 0<br>.<br>4<br>9<br>8 | 0<br>.<br>8<br>4<br>6 | 0.<br>0<br>1<br>6<br>1<br>9<br>9 | 0.<br>01 |  | 1 | 1 | 0 | 20<br>17 | 2<br>0<br>1<br>7 |
| Rh<br>eu<br>ma<br>toi<br>d<br>Ar<br>thr<br>itis | C<br>00<br>03<br>87<br>3 | PL<br>F  | 4<br>5<br>0<br>0<br>9<br>5 |            | Pulmonary<br>function                                           |                                                | 12<br>4 | 0<br>.<br>5<br>4<br>4 | 0<br>.<br>7<br>3<br>1 |                                  | 0.<br>01 |  | 0 | 1 | 0 | 20<br>19 | 2<br>0<br>1<br>9 |

|                      |          |        |      |        |                                           |                            |     |       |       |          |      |  |   |   |   |      |      |
|----------------------|----------|--------|------|--------|-------------------------------------------|----------------------------|-----|-------|-------|----------|------|--|---|---|---|------|------|
| Rheumatoid Arthritis | C0003873 | ND1    | 4535 | P03886 | NADH dehydrogenase, subunit 1 (complex I) | Enzyme                     | 260 | 0.522 | 0.769 |          | 0.01 |  | 1 | 1 | 0 | 2005 | 2005 |
| Rheumatoid Arthritis | C0003873 | MTNR1B | 4544 | P49286 | melatonin receptor 1B                     | G-protein coupled receptor | 93  | 0.588 | 0.731 | 0.00648  | 0.01 |  | 0 | 1 | 0 | 2005 | 2005 |
| Rheumatoid Arthritis | C0003873 | MUC2   | 4583 | Q02817 | mucin 2, oligomeric mucus/gel-forming     | Enzyme modulator           | 225 | 0.486 | 0.808 | 9.43E-10 | 0.01 |  | 1 | 1 | 0 | 2008 | 2008 |
| Rheumatoid Arthritis | C0003873 | MUC3A  | 4584 | Q02505 | mucin 3A, cell surface associated         |                            | 52  | 0.636 | 0.5   | 1.48E-10 | 0.01 |  | 1 | 1 | 0 | 2008 | 2008 |
| Rheumatoid Arthritis | C0003873 | MUC4   | 4585 | Q99102 | mucin 4, cell surface associated          |                            | 183 | 0.506 | 0.769 | 2.79E-54 | 0.01 |  | 1 | 1 | 0 | 2005 | 2005 |
| Rheumatoid Arthritis | C0003873 | MUC5AC | 4586 | P98088 | mucin 5AC, oligomeric mucus/gel-forming   | Enzyme modulator           | 224 | 0.483 | 0.808 | 9.99E-09 | 0.01 |  | 1 | 1 | 0 | 2008 | 2008 |
| Rheumatoid           | C0003    | MX1    | 4599 | P20591 | MX dynamin like                           | Enzyme                     | 71  | 0.5   | 0.7   | 3.42E    | 0.01 |  | 1 | 1 | 0 | 2017 | 2017 |

|                                                 |                          |                      |                  |            |                                                                     |                                                |         |                       |                       |                                  |          |  |   |   |   |          |                  |
|-------------------------------------------------|--------------------------|----------------------|------------------|------------|---------------------------------------------------------------------|------------------------------------------------|---------|-----------------------|-----------------------|----------------------------------|----------|--|---|---|---|----------|------------------|
| d<br>Ar<br>thr<br>itis                          | 87<br>3                  |                      |                  |            | GTPase<br>1                                                         | dul<br>ato<br>r                                |         | 9<br>9                | 3<br>1                | -<br>1<br>8                      |          |  |   |   |   |          |                  |
| Rh<br>eu<br>ma<br>toi<br>d<br>Ar<br>thr<br>itis | C<br>00<br>03<br>87<br>3 | MY<br>CN             | 4<br>6<br>1<br>3 | P0419<br>8 | MYCN<br>proto-<br>oncogen<br>e, bHLH<br>transcrip<br>tion<br>factor | Tr<br>ans<br>cri<br>pti<br>on<br>fac<br>tor    | 31<br>4 | 0<br>.<br>4<br>5<br>4 | 0<br>.<br>8<br>0<br>8 | 0.<br>8<br>8<br>9<br>7           | 0.<br>01 |  | 1 | 1 | 0 | 20<br>05 | 2<br>0<br>0<br>5 |
| Rh<br>eu<br>ma<br>toi<br>d<br>Ar<br>thr<br>itis | C<br>00<br>03<br>87<br>3 | SE<br>RPI<br>NC<br>1 | 4<br>6<br>2      | P0100<br>8 | serpin<br>family C<br>member<br>1                                   | En<br>zy<br>me<br>mo<br>dul<br>ato<br>r        | 18<br>4 | 0<br>.<br>5<br>0<br>7 | 0<br>.<br>7<br>6<br>9 | 0.<br>9<br>9<br>2                | 0.<br>01 |  | 1 | 1 | 0 | 19<br>96 | 1<br>9<br>9<br>6 |
| Rh<br>eu<br>ma<br>toi<br>d<br>Ar<br>thr<br>itis | C<br>00<br>03<br>87<br>3 | AT<br>F3             | 4<br>6<br>7      | P1884<br>7 | activatin<br>g<br>transcrip<br>tion<br>factor 3                     | Tr<br>ans<br>cri<br>pti<br>on<br>fac<br>tor    | 22<br>8 | 0<br>.<br>4<br>9<br>4 | 0<br>.<br>8<br>8<br>5 | 0.<br>0<br>2<br>9<br>6           | 0.<br>01 |  | 1 | 1 | 0 | 20<br>19 | 2<br>0<br>1<br>9 |
| Rh<br>eu<br>ma<br>toi<br>d<br>Ar<br>thr<br>itis | C<br>00<br>03<br>87<br>3 | NB<br>N              | 4<br>6<br>8<br>3 | O609<br>34 | nibrin                                                              | Nu<br>cle<br>ic<br>aci<br>d<br>bin<br>din<br>g | 29<br>1 | 0<br>.<br>4<br>6<br>7 | 0<br>.<br>8<br>0<br>8 | 2.<br>1<br>8<br>E<br>-<br>1<br>6 | 0.<br>01 |  | 1 | 1 | 0 | 20<br>17 | 2<br>0<br>1<br>7 |
| Rh<br>eu<br>ma<br>toi<br>d<br>Ar<br>thr<br>itis | C<br>00<br>03<br>87<br>3 | NC<br>F4             | 4<br>6<br>8<br>9 | Q150<br>80 | neutrophil<br>cytosolic<br>factor 4                                 |                                                | 58      | 0<br>.<br>6<br>4<br>4 | 0<br>.<br>6<br>1<br>5 | 9.<br>0<br>2<br>E<br>-<br>0<br>8 | 0.<br>01 |  | 1 | 1 | 0 | 20<br>07 | 2<br>0<br>0<br>7 |
| Rh<br>eu<br>ma<br>toi<br>d<br>Ar<br>thr<br>itis | C<br>00<br>03<br>87<br>3 | ND<br>UF<br>A7       | 4<br>7<br>0<br>1 | O951<br>82 | NADH:ubiqui<br>none<br>oxidoreductas<br>e subunit A7                |                                                | 2       | 0<br>.<br>9<br>3<br>1 | 0<br>.<br>1<br>1<br>5 | 6.<br>6<br>E<br>-<br>0<br>5      | 0.<br>01 |  | 1 | 1 | 0 | 20<br>15 | 2<br>0<br>1<br>5 |

|                      |          |          |      |        |                                                                     |                         |     |       |       |          |      |  |   |   |   |      |      |
|----------------------|----------|----------|------|--------|---------------------------------------------------------------------|-------------------------|-----|-------|-------|----------|------|--|---|---|---|------|------|
| Rheumatoid Arthritis | C0003873 | NDUF S3  | 4722 | O75489 | NADH:ubiquinone oxidoreductase core subunit S3                      |                         | 120 | 0.581 | 0.769 | 0.00583  | 0.01 |  | 1 | 1 | 0 | 2007 | 2007 |
| Rheumatoid Arthritis | C0003873 | NE DD 9  | 4739 | Q14511 | neural precursor cell expressed, developmentally down-regulated 9   |                         | 113 | 0.548 | 0.769 | 0.12634  | 0.01 |  | 1 | 1 | 0 | 2003 | 2003 |
| Rheumatoid Arthritis | C0003873 | AT OH 1  | 474  | Q92858 | atonal bHLH transcription factor 1                                  | Enzyme                  | 53  | 0.633 | 0.5   | 0.01783  | 0.01 |  | 1 | 1 | 0 | 1997 | 1997 |
| Rheumatoid Arthritis | C0003873 | NE LL 1  | 4745 | Q92832 | neural EGFL like 1                                                  | Calcium-binding protein | 122 | 0.539 | 0.761 | 8.67E-12 | 0.01 |  | 1 | 1 | 0 | 2012 | 2012 |
| Rheumatoid Arthritis | C0003873 | NE U1    | 4758 | Q99519 | neuraminidase 1                                                     | Enzyme                  | 207 | 0.513 | 0.769 | 7.34E-05 | 0.01 |  | 1 | 1 | 0 | 2019 | 2019 |
| Rheumatoid Arthritis | C0003873 | AT P1 A1 | 476  | P05023 | ATPase Na <sup>+</sup> /K <sup>+</sup> transporting subunit alpha 1 | Transporter             | 89  | 0.601 | 0.808 | 1        | 0.01 |  | 1 | 1 | 0 | 2005 | 2005 |
| Rheumatoid           | C0003    | NF AT C2 | 4773 | Q13469 | nuclear factor of activate                                          | Transcripti             | 154 | 0.5   | 0.7   | 0.999    | 0.01 |  | 1 | 1 | 0 | 2015 | 2015 |

|                      |          |        |      |        |                                              |                      |     |       |       |         |      |  |   |   |   |      |      |
|----------------------|----------|--------|------|--------|----------------------------------------------|----------------------|-----|-------|-------|---------|------|--|---|---|---|------|------|
| d Arthritis          | 873      |        |      |        | d T cells 2                                  | on factor            |     | 25    | 31    | 95      |      |  |   |   |   |      |      |
| Rheumatoid Arthritis | C0003873 | NFIA   | 4774 | Q12857 | nuclear factor I A                           | Nucleic acid binding | 95  | 0.599 | 0.808 | 0.995   | 0.01 |  | 1 | 1 | 0 | 2016 | 2016 |
| Rheumatoid Arthritis | C0003873 | NFILA3 | 4783 | Q16649 | nuclear factor, interleukin 3 regulated      | Transcription factor | 54  | 0.633 | 0.615 | 0.8197  | 0.01 |  | 1 | 1 | 0 | 2013 | 2013 |
| Rheumatoid Arthritis | C0003873 | NFKBIB | 4793 | Q15653 | NFKB inhibitor beta                          |                      | 16  | 0.743 | 0.462 | 0.4245  | 0.01 |  | 1 | 1 | 0 | 2017 | 2017 |
| Rheumatoid Arthritis | C0003873 | NFYA   | 4800 | P23511 | nuclear transcription factor Y subunit alpha | Nucleic acid binding | 43  | 0.65  | 0.654 | 0.14619 | 0.01 |  | 1 | 1 | 0 | 2013 | 2013 |
| Rheumatoid Arthritis | C0003873 | NNAT   | 4826 | Q16517 | neuronatin                                   |                      | 50  | 0.633 | 0.538 | 0.4036  | 0.01 |  | 1 | 1 | 0 | 2017 | 2017 |
| Rheumatoid Arthritis | C0003873 | NMT1   | 4836 | P30419 | N-myristoyltransferase 1                     | Enzyme               | 22  | 0.78  | 0.423 | 0.955   | 0.01 |  | 1 | 1 | 0 | 2019 | 2019 |
| Rheumatoid Arthritis | C0003873 | NONO   | 488  | Q15233 | non-POU                                      | Nucle                | 142 | 0.    | 0.    | 0.9     | 0.01 |  | 1 | 1 | 0 | 2017 | 2017 |

|                         |          |        |        |        |                                         |                         |     |       |       |          |      |  |   |   |   |      |      |
|-------------------------|----------|--------|--------|--------|-----------------------------------------|-------------------------|-----|-------|-------|----------|------|--|---|---|---|------|------|
| matoid<br>Arthritis     | 03873    |        | 41     |        | domain containing octamer binding       | ic acid binding         |     | 554   | 731   | 935      |      |  |   |   |   |      | 17   |
| Rheumatoid<br>Arthritis | C0003873 | NPAS2  | 4862   | Q99743 | neuronal domain protein 2               | PAS                     | 82  | 0.595 | 0.654 | 1        | 0.01 |  | 1 | 1 | 0 | 2015 | 2015 |
| Rheumatoid<br>Arthritis | C0003873 | NPBP   | 4879   | P16860 | natriuretic peptide B                   |                         | 193 | 0.513 | 0.888 | 9.8E-06  | 0.01 |  | 1 | 1 | 0 | 2008 | 2008 |
| Rheumatoid<br>Arthritis | C0003873 | NTRK1  | 4914   | P04629 | neurotrophic receptor tyrosine kinase 1 | Kinase                  | 443 | 0.422 | 0.808 | 1.96E-06 | 0.01 |  | 1 | 1 | 0 | 2017 | 2017 |
| Rheumatoid<br>Arthritis | C0003873 | NUCB2  | 4925   | P80303 | nucleobindin 2                          | Calcium-binding protein | 140 | 0.54  | 0.731 | 2E-10    | 0.01 |  | 1 | 1 | 0 | 2018 | 2018 |
| Rheumatoid<br>Arthritis | C0003873 | OAP    | 4937   |        | osteoarthritis, precocious              |                         | 9   | 0.792 | 0.992 |          | 0.01 |  | 1 | 1 | 0 | 2016 | 2016 |
| Rheumatoid<br>Ar        | C0003873 | MIR382 | 494331 |        | microRNA 382                            |                         | 71  | 0.603 | 0.692 |          | 0.01 |  | 1 | 1 | 0 | 2017 | 2017 |

|                      |          |       |      |        |                                    |                            |     |       |       |          |      |  |   |   |   |      |      |
|----------------------|----------|-------|------|--------|------------------------------------|----------------------------|-----|-------|-------|----------|------|--|---|---|---|------|------|
| thrititis            |          |       |      |        |                                    |                            |     |       |       |          |      |  |   |   |   |      |      |
| Rheumatoid Arthritis | C0003873 | OAZ1  | 4946 | P54368 | ornithine decarboxylase antizyme 1 | Enzyme modulator           | 22  | 0.722 | 0.423 | 0.1747   | 0.01 |  | 1 | 1 | 0 | 2010 | 2010 |
| Rheumatoid Arthritis | C0003873 | ODF1  | 4956 | Q14990 | outer dense fiber of sperm tails 1 |                            | 14  | 0.769 | 0.385 | 0.9721   | 0.01 |  | 1 | 1 | 0 | 2000 | 2000 |
| Rheumatoid Arthritis | C0003873 | OPRK1 | 4986 | P41145 | opioid receptor kappa 1            | G-protein coupled receptor | 156 | 0.555 | 0.615 | 4.06E-05 | 0.01 |  | 1 | 1 | 0 | 2000 | 2000 |
| Rheumatoid Arthritis | C0003873 | P2RX1 | 5023 | P51575 | purinergic receptor P2X 1          | Ion channel                | 94  | 0.584 | 0.808 | 6.76E-11 | 0.01 |  | 1 | 1 | 0 | 2010 | 2010 |
| Rheumatoid Arthritis | C0003873 | P2RX3 | 5024 | P56373 | purinergic receptor P2X 3          | Ion channel                | 125 | 0.565 | 0.769 | 1.03E-06 | 0.01 |  | 1 | 1 | 0 | 2010 | 2010 |
| Rheumatoid Arthritis | C0003873 | P2RX4 | 5025 | Q99571 | purinergic receptor P2X 4          | Ion channel                | 138 | 0.547 | 0.808 | 4.98E-12 | 0.01 |  | 1 | 1 | 0 | 2010 | 2010 |

|                      |         |        |      |        |                                                |                            |     |       |       |          |      |  |   |   |   |      |      |
|----------------------|---------|--------|------|--------|------------------------------------------------|----------------------------|-----|-------|-------|----------|------|--|---|---|---|------|------|
| Rheumatoid Arthritis | C003873 | P2RX5  | 5026 | Q93086 | purinergic receptor P2X 5                      | Ion channel                | 132 | 0.548 | 0.769 | 2.85E-13 | 0.01 |  | 1 | 1 | 0 | 2010 | 2010 |
| Rheumatoid Arthritis | C003873 | P2RY1  | 5028 | P47900 | purinergic receptor P2Y1                       | G-protein coupled receptor | 126 | 0.551 | 0.769 | 0.51522  | 0.01 |  | 1 | 1 | 0 | 2010 | 2010 |
| Rheumatoid Arthritis | C003873 | P2RY2  | 5029 | P41231 | purinergic receptor P2Y2                       | G-protein coupled receptor | 136 | 0.543 | 0.808 | 0.04245  | 0.01 |  | 1 | 1 | 0 | 2010 | 2010 |
| Rheumatoid Arthritis | C003873 | P2RY11 | 5032 | Q96G91 | purinergic receptor P2Y11                      | G-protein coupled receptor | 27  | 0.705 | 0.538 | 0.07706  | 0.01 |  | 1 | 1 | 0 | 2019 | 2019 |
| Rheumatoid Arthritis | C003873 | PEBP1  | 5037 | P30086 | phosphatidylethanolamine binding protein 1     | Enzyme modulator           | 181 | 0.5   | 0.808 | 0.09167  | 0.01 |  | 1 | 1 | 0 | 2012 | 2012 |
| Rheumatoid Arthritis | C003873 | FURIN  | 5045 | P09958 | furin, paired basic amino acid cleaving enzyme | Enzyme                     | 80  | 0.612 | 0.769 | 0.9994   | 0.01 |  | 1 | 1 | 0 | 2019 | 2019 |



|                      |          |             |       |               |                                            |                      |     |       |       |          |      |  |   |   |   |      |      |
|----------------------|----------|-------------|-------|---------------|--------------------------------------------|----------------------|-----|-------|-------|----------|------|--|---|---|---|------|------|
| Rheumatoid Arthritis | C0003873 | SE RPI NB 2 | 5055  | P05120        | serpin family B member 2                   | Enzyme modulator     | 183 | 0.502 | 0.88  | 6.38E-12 | 0.01 |  | 1 | 1 | 0 | 2017 | 2017 |
| Rheumatoid Arthritis | C0003873 | DEF6        | 50619 | Q9H4E7        | DEF6 guanine nucleotide exchange factor    | Nucleic acid binding | 22  | 0.751 | 0.346 | 0.99768  | 0.01 |  | 1 | 1 | 0 | 2017 | 2017 |
| Rheumatoid Arthritis | C0003873 | PARD6A      | 50855 | Q9NPB6        | par-6 family cell polarity regulator alpha | Cell-cell junction   | 6   | 0.861 | 0.231 | 0.006472 | 0.01 |  | 1 | 1 | 0 | 2008 | 2008 |
| Rheumatoid Arthritis | C0003873 | PCBP1       | 50933 | Q15365        | poly(rC) binding protein 1                 | Enzyme               | 49  | 0.658 | 0.538 | 0.99945  | 0.01 |  | 1 | 1 | 0 | 2017 | 2017 |
| Rheumatoid Arthritis | C0003873 | IBD5        | 50941 |               | inflammatory bowel disease 5               |                      | 21  | 0.705 | 0.358 |          | 0.01 |  | 1 | 1 | 0 | 2004 | 2004 |
| Rheumatoid Arthritis | C0003873 | EXOSC1      | 51013 | Q9Y3B2        | exosome component 1                        | Enzyme               | 3   | 0.931 | 0.154 | 7.35E-09 | 0.01 |  | 1 | 1 | 0 | 2016 | 2016 |
| Rheumatoid Ar        | C0003873 | TMED7       | 51014 | Q86XR7;Q9Y3B3 | transmembrane p24 trafficking protein 7    | Transporter          | 336 | 0.436 | 0.808 | 0.47966  | 0.01 |  | 1 | 1 | 0 | 2005 | 2005 |

|                                                 |                          |                     |                       |            |                                                                    |                |         |                       |                       |                                  |          |  |   |   |   |          |                  |
|-------------------------------------------------|--------------------------|---------------------|-----------------------|------------|--------------------------------------------------------------------|----------------|---------|-----------------------|-----------------------|----------------------------------|----------|--|---|---|---|----------|------------------|
| thr<br>itis                                     |                          |                     |                       |            |                                                                    |                |         |                       |                       |                                  |          |  |   |   |   |          |                  |
| Rh<br>eu<br>ma<br>toi<br>d<br>Ar<br>thr<br>itis | C<br>00<br>03<br>87<br>3 | ND<br>UF<br>A1<br>3 | 5<br>1<br>0<br>7<br>9 | Q9P0<br>J0 | NADH:<br>ubiquino<br>ne<br>oxidored<br>uctase<br>subunit<br>A13    | En<br>zy<br>me | 13<br>1 | 0<br>.<br>5<br>5<br>6 | 0<br>.<br>6<br>9<br>2 | 3.<br>8<br>E<br>-<br>0<br>6      | 0.<br>01 |  | 1 | 1 | 0 | 20<br>18 | 2<br>0<br>1<br>8 |
| Rh<br>eu<br>ma<br>toi<br>d<br>Ar<br>thr<br>itis | C<br>00<br>03<br>87<br>3 | RM<br>DN<br>1       | 5<br>1<br>1<br>1<br>5 | Q96D<br>B5 | regulator<br>of<br>microtubule<br>dynamics 1                       |                | 12<br>3 | 0<br>.<br>5<br>4<br>6 | 0<br>.<br>7<br>6<br>9 | 5.<br>9<br>E<br>-<br>1<br>0      | 0.<br>01 |  | 1 | 1 | 0 | 20<br>19 | 2<br>0<br>1<br>9 |
| Rh<br>eu<br>ma<br>toi<br>d<br>Ar<br>thr<br>itis | C<br>00<br>03<br>87<br>3 | IR<br>AK<br>4       | 5<br>1<br>1<br>3<br>5 | Q9N<br>WZ3 | interleuk<br>in 1<br>receptor<br>associat<br>ed<br>kinase 4        | Ki<br>nas<br>e | 90      | 0<br>.<br>5<br>7<br>8 | 0<br>.<br>7<br>6<br>9 | 7.<br>8<br>E<br>-<br>0<br>9      | 0.<br>01 |  | 1 | 1 | 0 | 20<br>19 | 2<br>0<br>1<br>9 |
| Rh<br>eu<br>ma<br>toi<br>d<br>Ar<br>thr<br>itis | C<br>00<br>03<br>87<br>3 | DB<br>R1            | 5<br>1<br>1<br>6<br>3 | Q9U<br>K59 | debranc<br>hing<br>RNA<br>lariats 1                                | En<br>zy<br>me | 15      | 0<br>.<br>7<br>6<br>9 | 0<br>.<br>3<br>8<br>5 | 1.<br>1<br>8<br>E<br>-<br>0<br>8 | 0.<br>01 |  | 1 | 1 | 0 | 20<br>16 | 2<br>0<br>1<br>6 |
| Rh<br>eu<br>ma<br>toi<br>d<br>Ar<br>thr<br>itis | C<br>00<br>03<br>87<br>3 | ZD<br>HH<br>C2      | 5<br>1<br>2<br>0<br>1 | Q9UI<br>J5 | zinc finger<br>DHHC-type<br>palmitoyltrans<br>ferase 2             |                | 24      | 0<br>.<br>7<br>2<br>9 | 0<br>.<br>4<br>6<br>2 | 0.<br>0<br>0<br>1<br>0<br>0<br>1 | 0.<br>01 |  | 1 | 1 | 0 | 20<br>06 | 2<br>0<br>0<br>6 |
| Rh<br>eu<br>ma<br>toi<br>d<br>Ar<br>thr<br>itis | C<br>00<br>03<br>87<br>3 | PC<br>SK<br>1       | 5<br>1<br>2<br>2      | P2912<br>0 | proprote<br>in<br>converta<br>se<br>subtilisi<br>n/kexin<br>type 1 | En<br>zy<br>me | 14<br>0 | 0<br>.<br>5<br>4<br>8 | 0<br>.<br>6<br>1<br>5 | 2.<br>7<br>5<br>E<br>-<br>0<br>9 | 0.<br>01 |  | 1 | 1 | 0 | 20<br>01 | 2<br>0<br>0<br>1 |
| Rh<br>eu<br>ma<br>toi                           | C<br>00<br>03            | CL<br>EC<br>1B      | 5<br>1<br>2           | Q9P1<br>26 | C-type lectin<br>domain family<br>1 member B                       |                | 58      | 0<br>.<br>6<br>5      | 0<br>.<br>6<br>6      | 4.<br>9<br>4<br>E                | 0.<br>01 |  | 1 | 1 | 0 | 20<br>14 | 2<br>0<br>1<br>4 |

|                                                 |                          |                |                       |            |                                                          |                                             |         |                       |                       |                                  |          |  |   |   |   |          |                  |
|-------------------------------------------------|--------------------------|----------------|-----------------------|------------|----------------------------------------------------------|---------------------------------------------|---------|-----------------------|-----------------------|----------------------------------|----------|--|---|---|---|----------|------------------|
| d<br>Ar<br>thr<br>itis                          | 87<br>3                  |                | 6<br>6                |            |                                                          |                                             |         |                       | 1<br>5                | -<br>0<br>8                      |          |  |   |   |   |          |                  |
| Rh<br>eu<br>ma<br>toi<br>d<br>Ar<br>thr<br>itis | C<br>00<br>03<br>87<br>3 | RA<br>SL<br>12 | 5<br>1<br>2<br>8<br>5 | Q9N<br>YN1 | RAS<br>like<br>family<br>12                              | En<br>zy<br>me<br>mo<br>dul<br>ato<br>r     | 14      | 0<br>.<br>7<br>5<br>1 | 0<br>.<br>3<br>8<br>5 | 0.<br>0<br>0<br>8<br>7<br>1      | 0.<br>01 |  | 1 | 1 | 0 | 20<br>18 | 2<br>0<br>1<br>8 |
| Rh<br>eu<br>ma<br>toi<br>d<br>Ar<br>thr<br>itis | C<br>00<br>03<br>87<br>3 | PC<br>YT<br>1A | 5<br>1<br>3<br>0      | P4958<br>5 | phosphate<br>cytidyltransf<br>erase 1,<br>choline, alpha |                                             | 25<br>6 | 0<br>.<br>4<br>8<br>5 | 0<br>.<br>8<br>8<br>5 | 2.<br>0<br>2<br>E<br>-<br>0<br>5 | 0.<br>01 |  | 1 | 1 | 0 | 20<br>11 | 2<br>0<br>1<br>1 |
| Rh<br>eu<br>ma<br>toi<br>d<br>Ar<br>thr<br>itis | C<br>00<br>03<br>87<br>3 | ZB<br>TB<br>7A | 5<br>1<br>3<br>4<br>1 | O953<br>65 | zinc<br>finger<br>and BTB<br>domain<br>containi<br>ng 7A | Tr<br>ans<br>cri<br>pti<br>on<br>fac<br>tor | 10<br>3 | 0<br>.<br>5<br>6<br>4 | 0<br>.<br>7<br>6<br>9 | 0.<br>9<br>5<br>9<br>1<br>5      | 0.<br>01 |  | 1 | 1 | 0 | 20<br>11 | 2<br>0<br>1<br>1 |
| Rh<br>eu<br>ma<br>toi<br>d<br>Ar<br>thr<br>itis | C<br>00<br>03<br>87<br>3 | HO<br>OK<br>1  | 5<br>1<br>3<br>6<br>1 | Q9UJ<br>C3 | hook<br>microtu<br>bule<br>tethering<br>protein 1        | En<br>zy<br>me<br>mo<br>dul<br>ato<br>r     | 24      | 0<br>.<br>7<br>1<br>6 | 0<br>.<br>4<br>6<br>2 | 3.<br>8<br>7<br>E<br>-<br>0<br>8 | 0.<br>01 |  | 1 | 1 | 0 | 20<br>19 | 2<br>0<br>1<br>9 |
| Rh<br>eu<br>ma<br>toi<br>d<br>Ar<br>thr<br>itis | C<br>00<br>03<br>87<br>3 | PD<br>E4<br>D  | 5<br>1<br>4<br>4      | Q084<br>99 | phosphodieste<br>rase 4D                                 |                                             | 21<br>0 | 0<br>.<br>5<br>1<br>9 | 0<br>.<br>8<br>4<br>6 | 0.<br>9<br>9<br>8                | 0.<br>01 |  | 1 | 1 | 0 | 20<br>16 | 2<br>0<br>1<br>6 |
| Rh<br>eu<br>ma<br>toi<br>d<br>Ar<br>thr<br>itis | C<br>00<br>03<br>87<br>3 | ISY<br>NA<br>1 | 5<br>1<br>4<br>7<br>7 | Q9NP<br>H2 | inositol-3-<br>phosphate<br>synthase 1                   |                                             | 16<br>8 | 0<br>.<br>5<br>1      | 0<br>.<br>7<br>6<br>9 | 2.<br>4<br>9<br>E<br>-<br>0<br>5 | 0.<br>01 |  | 1 | 1 | 0 | 20<br>04 | 2<br>0<br>0<br>4 |

|                      |          |           |       |        |                                                 |             |     |       |        |          |      |  |   |   |   |      |      |
|----------------------|----------|-----------|-------|--------|-------------------------------------------------|-------------|-----|-------|--------|----------|------|--|---|---|---|------|------|
| Rheumatoid Arthritis | C0003873 | NE LF CD  | 51497 | Q8IXH7 | negative elongation factor complex member C/D   |             | 24  | 0.705 | 0.758  | 0.1707   | 0.01 |  | 1 | 1 | 0 | 2010 | 2010 |
| Rheumatoid Arthritis | C0003873 | ZC3H C1   | 51530 | Q86WB0 | zinc finger C3HC-type containing 1              |             | 23  | 0.76  | 0.7308 | 0.00256  | 0.01 |  | 1 | 1 | 1 | 2013 | 2013 |
| Rheumatoid Arthritis | C0003873 | SC LY     | 51540 | Q96I15 | selenocysteine lyase                            | Enzyme      | 161 | 0.533 | 0.731  | 2.33E-09 | 0.01 |  | 1 | 1 | 0 | 2004 | 2004 |
| Rheumatoid Arthritis | C0003873 | ATP6 V1 H | 51606 | Q9UI12 | ATPase H <sup>+</sup> transporting V1 subunit H | Transporter | 13  | 0.78  | 0.746  | 0.00145  | 0.01 |  | 1 | 1 | 0 | 2017 | 2017 |
| Rheumatoid Arthritis | C0003873 | PD K1     | 51633 | Q15118 | pyruvate dehydrogenase kinase 1                 | Kinase      | 164 | 0.51  | 0.808  | 1.1E-05  | 0.01 |  | 1 | 1 | 0 | 2019 | 2019 |
| Rheumatoid Arthritis | C0003873 | SF3 B6    | 51639 | Q9Y3B4 | splicing factor 3b subunit 6                    |             | 116 | 0.544 | 0.808  | 0.5502   | 0.01 |  | 1 | 1 | 0 | 1990 | 1990 |
| Rheumatoid Ar        | C0003873 | EN PP1    | 5167  | P22413 | ectonucleotide pyrophosphatase /phosph          | Enzyme      | 247 | 0.498 | 0.808  | 4.9E-01  | 0.01 |  | 1 | 1 | 0 | 2001 | 2001 |

|                                                 |                          |               |                       |            |                                                                             |                      |         |                       |                       |                                  |          |  |   |   |   |          |                  |
|-------------------------------------------------|--------------------------|---------------|-----------------------|------------|-----------------------------------------------------------------------------|----------------------|---------|-----------------------|-----------------------|----------------------------------|----------|--|---|---|---|----------|------------------|
| thr<br>itis                                     |                          |               |                       |            | odiester<br>ase 1                                                           |                      |         |                       |                       | 0<br>8                           |          |  |   |   |   |          |                  |
| Rh<br>eu<br>ma<br>toi<br>d<br>Ar<br>thr<br>itis | C<br>00<br>03<br>87<br>3 | PD<br>PK<br>1 | 5<br>1<br>7<br>0      | O155<br>30 | 3-<br>phospho<br>inositide<br>depende<br>nt<br>protein<br>kinase 1          | Ki<br>nas<br>e       | 77      | 0<br>.<br>5<br>8<br>8 | 0<br>.<br>8<br>0<br>8 | 0.<br>9<br>8<br>0<br>1<br>3      | 0.<br>01 |  | 1 | 1 | 0 | 20<br>19 | 2<br>0<br>1<br>9 |
| Rh<br>eu<br>ma<br>toi<br>d<br>Ar<br>thr<br>itis | C<br>00<br>03<br>87<br>3 | GH<br>RL      | 5<br>1<br>7<br>3<br>8 | Q9UB<br>U3 | ghrelin and<br>obestatin<br>prepropeptide                                   |                      | 18<br>3 | 0<br>.<br>5<br>1<br>7 | 0<br>.<br>7<br>6<br>9 | 1.<br>3<br>9<br>E<br>-<br>1<br>1 | 0.<br>01 |  | 1 | 1 | 1 | 20<br>08 | 2<br>0<br>0<br>8 |
| Rh<br>eu<br>ma<br>toi<br>d<br>Ar<br>thr<br>itis | C<br>00<br>03<br>87<br>3 | AC<br>P1      | 5<br>2                | P2466<br>6 | acid<br>phosphatase 1                                                       |                      | 10<br>7 | 0<br>.<br>5<br>6<br>6 | 0<br>.<br>7<br>3<br>1 | 1.<br>7<br>5<br>E<br>-<br>0<br>8 | 0.<br>01 |  | 1 | 1 | 0 | 20<br>11 | 2<br>0<br>1<br>1 |
| Rh<br>eu<br>ma<br>toi<br>d<br>Ar<br>thr<br>itis | C<br>00<br>03<br>87<br>3 | PG<br>K1      | 5<br>2<br>3<br>0      | P0055<br>8 | phospho<br>glycerat<br>e kinase<br>1                                        | Ki<br>nas<br>e       | 14<br>4 | 0<br>.<br>5<br>4<br>2 | 0<br>.<br>7<br>6<br>9 | 0.<br>7<br>6<br>5<br>3<br>7      | 0.<br>01 |  | 1 | 1 | 0 | 20<br>16 | 2<br>0<br>1<br>6 |
| Rh<br>eu<br>ma<br>toi<br>d<br>Ar<br>thr<br>itis | C<br>00<br>03<br>87<br>3 | PG<br>M1      | 5<br>2<br>3<br>6      | P3687<br>1 | phosphogluco<br>mutase 1                                                    |                      | 72      | 0<br>.<br>6<br>2<br>8 | 0<br>.<br>5<br>7<br>7 | 5.<br>0<br>6<br>E<br>-<br>1<br>5 | 0.<br>01 |  | 1 | 1 | 0 | 19<br>85 | 1<br>9<br>8<br>5 |
| Rh<br>eu<br>ma<br>toi<br>d<br>Ar<br>thr<br>itis | C<br>00<br>03<br>87<br>3 | PH<br>EX      | 5<br>2<br>5<br>1      | P7856<br>2 | phospha<br>te<br>regulatin<br>g<br>endopep<br>tidase<br>homolog<br>X-linked | En<br>zy<br>me       | 14<br>2 | 0<br>.<br>5<br>4<br>8 | 0<br>.<br>8<br>0<br>8 | 0.<br>9<br>9<br>9<br>6           | 0.<br>01 |  | 1 | 1 | 0 | 20<br>18 | 2<br>0<br>1<br>8 |
| Rh<br>eu<br>ma<br>toi                           | C<br>00<br>03            | PI3           | 5<br>2<br>6<br>6      | P1995<br>7 | peptidas<br>e<br>inhibitor<br>3                                             | En<br>zy<br>me<br>mo | 92      | 0<br>.<br>5<br>7      | 0<br>.<br>6<br>6      | 0.<br>1<br>6<br>9                | 0.<br>01 |  | 1 | 1 | 0 | 20<br>17 | 2<br>0<br>1<br>7 |

|                                                 |                          |                     |                  |            |                                                                               |                 |         |                       |                       |                                  |          |  |   |   |   |          |                  |
|-------------------------------------------------|--------------------------|---------------------|------------------|------------|-------------------------------------------------------------------------------|-----------------|---------|-----------------------|-----------------------|----------------------------------|----------|--|---|---|---|----------|------------------|
| d<br>Ar<br>thr<br>itis                          | 87<br>3                  |                     |                  |            |                                                                               | dul<br>ato<br>r |         |                       | 9<br>2                | 6<br>5                           |          |  |   |   |   |          |                  |
| Rh<br>eu<br>ma<br>toi<br>d<br>Ar<br>thr<br>itis | C<br>00<br>03<br>87<br>3 | PIG<br>R            | 5<br>2<br>8<br>4 | P0183<br>3 | polymeric<br>immunoglobul<br>in receptor                                      |                 | 71      | 0<br>.<br>6<br>1<br>5 | 0<br>.<br>8<br>0<br>8 | 0.<br>8<br>1<br>3<br>1           | 0.<br>01 |  | 1 | 1 | 0 | 19<br>98 | 1<br>9<br>9<br>8 |
| Rh<br>eu<br>ma<br>toi<br>d<br>Ar<br>thr<br>itis | C<br>00<br>03<br>87<br>3 | PI<br>M1            | 5<br>2<br>9<br>2 | P1130<br>9 | Pim-1<br>proto-<br>oncogen<br>e,<br>serine/th<br>reonine<br>kinase            | Ki<br>nas<br>e  | 22<br>4 | 0<br>.<br>4<br>8<br>2 | 0<br>.<br>7<br>6<br>9 | 0.<br>8<br>4<br>8<br>4<br>6      | 0.<br>01 |  | 1 | 1 | 0 | 20<br>19 | 2<br>0<br>1<br>9 |
| Rh<br>eu<br>ma<br>toi<br>d<br>Ar<br>thr<br>itis | C<br>00<br>03<br>87<br>3 | PIN<br>1            | 5<br>3<br>0<br>0 | Q135<br>26 | peptidylprolyl<br>cis/trans<br>isomerase,<br>NIMA-<br>interacting 1           |                 | 21<br>2 | 0<br>.<br>4<br>8<br>8 | 0<br>.<br>7<br>6<br>9 | 0.<br>7<br>4<br>0<br>3<br>1      | 0.<br>01 |  | 1 | 1 | 0 | 20<br>09 | 2<br>0<br>0<br>9 |
| Rh<br>eu<br>ma<br>toi<br>d<br>Ar<br>thr<br>itis | C<br>00<br>03<br>87<br>3 | PK<br>D1            | 5<br>3<br>1<br>0 | P9816<br>1 | polycystin 1,<br>transient<br>receptor<br>potential<br>channel<br>interacting |                 | 21<br>7 | 0<br>.<br>4<br>9<br>3 | 0<br>.<br>7<br>6<br>9 | 1                                | 0.<br>01 |  | 1 | 1 | 0 | 20<br>01 | 2<br>0<br>0<br>1 |
| Rh<br>eu<br>ma<br>toi<br>d<br>Ar<br>thr<br>itis | C<br>00<br>03<br>87<br>3 | PL<br>A2<br>G2<br>A | 5<br>3<br>2<br>0 | P1455<br>5 | phospho<br>lipase<br>A2<br>group<br>IIA                                       | En<br>zy<br>me  | 21<br>5 | 0<br>.<br>4<br>8<br>8 | 0<br>.<br>8<br>0<br>8 | 0.<br>0<br>9<br>7<br>2<br>7<br>8 | 0.<br>01 |  | 1 | 1 | 0 | 20<br>11 | 2<br>0<br>1<br>1 |
| Rh<br>eu<br>ma<br>toi<br>d<br>Ar<br>thr<br>itis | C<br>00<br>03<br>87<br>3 | PL<br>AT            | 5<br>3<br>2<br>7 | P0075<br>0 | plasmin<br>ogen<br>activator<br>, tissue<br>type                              | En<br>zy<br>me  | 39<br>2 | 0<br>.<br>4<br>4<br>5 | 0<br>.<br>8<br>8<br>5 | 5.<br>6<br>6<br>E<br>-<br>0<br>5 | 0.<br>01 |  | 1 | 1 | 0 | 20<br>06 | 2<br>0<br>0<br>6 |

|                      |          |          |       |        |                                           |                  |     |       |       |          |      |  |   |   |   |      |      |
|----------------------|----------|----------|-------|--------|-------------------------------------------|------------------|-----|-------|-------|----------|------|--|---|---|---|------|------|
| Rheumatoid Arthritis | C0003873 | PLAUR    | 5329  | Q03405 | plasminogen activator, urokinase receptor |                  | 147 | 0.536 | 0.731 | 0.03538  | 0.01 |  | 1 | 1 | 0 | 2018 | 2018 |
| Rheumatoid Arthritis | C0003873 | SPAI7    | 53340 | Q15506 | sperm autoantigenic protein 17            |                  | 48  | 0.647 | 0.577 | 0.06616  | 0.01 |  | 1 | 1 | 0 | 2002 | 2002 |
| Rheumatoid Arthritis | C0003873 | PLCG2    | 5336  | P16885 | phospholipase C gamma 2                   | Enzyme           | 82  | 0.588 | 0.88  | 0.9562   | 0.01 |  | 1 | 1 | 0 | 2017 | 2017 |
| Rheumatoid Arthritis | C0003873 | PLD1     | 5337  | Q13393 | phospholipase D1                          |                  | 104 | 0.576 | 0.731 | 4.78E-21 | 0.01 |  | 1 | 1 | 0 | 2011 | 2011 |
| Rheumatoid Arthritis | C0003873 | SERPINF2 | 5345  | P08697 | serpin family F member 2                  | Enzyme modulator | 104 | 0.575 | 0.88  | 0.03624  | 0.01 |  | 1 | 1 | 0 | 1996 | 1996 |
| Rheumatoid Arthritis | C0003873 | PLK1     | 5347  | P53350 | polo like kinase 1                        | Kinase           | 253 | 0.467 | 0.88  | 0.97851  | 0.01 |  | 1 | 1 | 0 | 2007 | 2007 |
| Rheumatoid Ar        | C0003873 | PLTP     | 5360  | P55058 | phospholipid transfer protein             |                  | 62  | 0.633 | 0.654 | 9E-09    | 0.01 |  | 1 | 1 | 0 | 2018 | 2018 |

|                                                 |                          |                 |                       |            |                                                       |                      |         |                       |                       |                                  |          |  |   |   |   |          |                  |
|-------------------------------------------------|--------------------------|-----------------|-----------------------|------------|-------------------------------------------------------|----------------------|---------|-----------------------|-----------------------|----------------------------------|----------|--|---|---|---|----------|------------------|
| thr<br>itis                                     |                          |                 |                       |            |                                                       |                      |         |                       |                       |                                  |          |  |   |   |   |          |                  |
| Rh<br>eu<br>ma<br>toi<br>d<br>Ar<br>thr<br>itis | C<br>00<br>03<br>87<br>3 | IL2<br>0R<br>A  | 5<br>3<br>8<br>3<br>2 | Q9U<br>HF4 | interleuk<br>in 20<br>receptor<br>subunit<br>alpha    | Re<br>ce<br>pto<br>r | 25      | 0<br>.<br>7<br>1<br>6 | 0<br>.<br>3<br>4<br>6 | 0.<br>0<br>2<br>7<br>1<br>2<br>9 | 0.<br>01 |  | 1 | 1 | 0 | 20<br>19 | 2<br>0<br>1<br>9 |
| Rh<br>eu<br>ma<br>toi<br>d<br>Ar<br>thr<br>itis | C<br>00<br>03<br>87<br>3 | IL2<br>0R<br>B  | 5<br>3<br>8<br>3<br>3 | Q6U<br>XL0 | interleuk<br>in 20<br>receptor<br>subunit<br>beta     | Re<br>ce<br>pto<br>r | 12      | 0<br>.<br>7<br>6<br>9 | 0<br>.<br>3<br>4<br>6 | 3.<br>6<br>5<br>E<br>-<br>0<br>8 | 0.<br>01 |  | 0 | 1 | 0 | 20<br>16 | 2<br>0<br>1<br>6 |
| Rh<br>eu<br>ma<br>toi<br>d<br>Ar<br>thr<br>itis | C<br>00<br>03<br>87<br>3 | H2<br>BS<br>1   | 5<br>4<br>1<br>4<br>5 | P5705<br>3 | H2B.S histone<br>1                                    |                      | 22      | 0<br>.<br>7<br>1<br>1 | 0<br>.<br>6<br>1<br>5 |                                  | 0.<br>01 |  | 1 | 1 | 0 | 20<br>19 | 2<br>0<br>1<br>9 |
| Rh<br>eu<br>ma<br>toi<br>d<br>Ar<br>thr<br>itis | C<br>00<br>03<br>87<br>3 | CY<br>CS        | 5<br>4<br>2<br>0<br>5 | P9999<br>9 | cytochrome c,<br>somatic                              |                      | 67      | 0<br>.<br>5<br>9<br>9 | 0<br>.<br>7<br>6<br>9 | 0.<br>6<br>3<br>6<br>4<br>7      | 0.<br>01 |  | 1 | 1 | 0 | 20<br>12 | 2<br>0<br>1<br>2 |
| Rh<br>eu<br>ma<br>toi<br>d<br>Ar<br>thr<br>itis | C<br>00<br>03<br>87<br>3 | PO<br>LD<br>1   | 5<br>4<br>2<br>4      | P2834<br>0 | DNA<br>polymerase<br>delta 1,<br>catalytic<br>subunit |                      | 18<br>9 | 0<br>.<br>5<br>0<br>7 | 0<br>.<br>7<br>6<br>9 | 2.<br>4<br>2<br>E<br>-<br>0<br>6 | 0.<br>01 |  | 1 | 1 | 0 | 19<br>99 | 1<br>9<br>9<br>9 |
| Rh<br>eu<br>ma<br>toi<br>d<br>Ar<br>thr<br>itis | C<br>00<br>03<br>87<br>3 | TE<br>RF<br>2IP | 5<br>4<br>3<br>8<br>6 | Q9N<br>YB0 | TERF2<br>interacting<br>protein                       |                      | 12<br>6 | 0<br>.<br>5<br>4<br>8 | 0<br>.<br>7<br>3<br>1 | 2.<br>6<br>7<br>E<br>-<br>0<br>5 | 0.<br>01 |  | 1 | 1 | 0 | 20<br>06 | 2<br>0<br>0<br>6 |
| Rh<br>eu<br>ma<br>toi                           | C<br>00<br>03            | SIA<br>E        | 5<br>4<br>4           | Q9H<br>AT2 | sialic<br>acid<br>acetylest<br>erase                  | En<br>zy<br>me       | 30      | 0<br>.<br>7           | 0<br>.<br>5           | 7.<br>7<br>9<br>E                | 0.<br>01 |  | 1 | 1 | 0 | 20<br>15 | 2<br>0<br>1<br>5 |



|                                                 |                          |                |                       |            |                                       |                |         |                       |                       |                                  |          |  |   |   |   |          |                  |
|-------------------------------------------------|--------------------------|----------------|-----------------------|------------|---------------------------------------|----------------|---------|-----------------------|-----------------------|----------------------------------|----------|--|---|---|---|----------|------------------|
| d<br>Ar<br>thr<br>itis                          | 87<br>3                  |                | 1<br>4                |            |                                       |                | 1<br>1  | 7<br>7                | -<br>1<br>2           |                                  |          |  |   |   |   |          |                  |
| Rh<br>eu<br>ma<br>toi<br>d<br>Ar<br>thr<br>itis | C<br>00<br>03<br>87<br>3 | PO<br>MC       | 5<br>4<br>4<br>3      | P0118<br>9 | proopiomelan<br>ocortin               |                | 87<br>3 | 0<br>.<br>3<br>5<br>6 | 0<br>.<br>8<br>4<br>6 | 0.<br>0<br>0<br>1<br>1<br>7      | 0.<br>01 |  | 1 | 1 | 0 | 20<br>01 | 2<br>0<br>0<br>1 |
| Rh<br>eu<br>ma<br>toi<br>d<br>Ar<br>thr<br>itis | C<br>00<br>03<br>87<br>3 | PO<br>N2       | 5<br>4<br>4<br>5      | Q151<br>65 | paraoxonase 2                         |                | 11<br>7 | 0<br>.<br>5<br>6<br>6 | 0<br>.<br>8<br>0<br>8 | 5.<br>4<br>4<br>E<br>-<br>0<br>5 | 0.<br>01 |  | 1 | 1 | 0 | 20<br>18 | 2<br>0<br>1<br>8 |
| Rh<br>eu<br>ma<br>toi<br>d<br>Ar<br>thr<br>itis | C<br>00<br>03<br>87<br>3 | SM<br>OX       | 5<br>4<br>4<br>9<br>8 | Q9N<br>WM0 | spermine<br>oxidase                   |                | 91      | 0<br>.<br>6<br>0<br>3 | 0<br>.<br>7<br>6<br>9 | 0.<br>3<br>9<br>6<br>4           | 0.<br>01 |  | 1 | 1 | 0 | 20<br>17 | 2<br>0<br>1<br>7 |
| Rh<br>eu<br>ma<br>toi<br>d<br>Ar<br>thr<br>itis | C<br>00<br>03<br>87<br>3 | AT<br>R        | 5<br>4<br>5           | Q135<br>35 | ATR<br>serine/th<br>reonine<br>kinase | Ki<br>nas<br>e | 32<br>1 | 0<br>.<br>4<br>5<br>6 | 0<br>.<br>9<br>2<br>3 | 3.<br>5<br>2<br>E<br>-<br>0<br>9 | 0.<br>01 |  | 1 | 1 | 0 | 20<br>06 | 2<br>0<br>0<br>6 |
| Rh<br>eu<br>ma<br>toi<br>d<br>Ar<br>thr<br>itis | C<br>00<br>03<br>87<br>3 | PO<br>U2<br>F1 | 5<br>4<br>5<br>1      | P1485<br>9 | POU class 2<br>homeobox 1             |                | 11<br>5 | 0<br>.<br>5<br>5<br>8 | 0<br>.<br>7<br>6<br>9 | 0.<br>9<br>0<br>2<br>2<br>9      | 0.<br>01 |  | 1 | 1 | 0 | 19<br>98 | 1<br>9<br>9<br>8 |
| Rh<br>eu<br>ma<br>toi<br>d<br>Ar<br>thr<br>itis | C<br>00<br>03<br>87<br>3 | PO<br>U2<br>F2 | 5<br>4<br>5<br>2      | P0908<br>6 | POU class 2<br>homeobox 2             |                | 69      | 0<br>.<br>5<br>9<br>9 | 0<br>.<br>6<br>9<br>2 | 0.<br>9<br>9<br>8<br>8<br>4      | 0.<br>01 |  | 1 | 1 | 0 | 20<br>19 | 2<br>0<br>1<br>9 |
| Rh<br>eu                                        | C<br>00                  | UG<br>T1       | 5<br>4                | Q9H<br>AW8 | UDP<br>glucuronosyltr                 |                | 88      | 0<br>.                | 0<br>.                | 4.<br>5                          | 0.<br>01 |  | 1 | 1 | 0 | 20<br>12 | 2<br>0           |

|                      |          |        |       |        |                                                  |     |       |       |          |      |  |   |   |   |      |      |
|----------------------|----------|--------|-------|--------|--------------------------------------------------|-----|-------|-------|----------|------|--|---|---|---|------|------|
| matoid Arthritis     | 03873    | A10    | 575   |        | transferase family 1 member A10                  |     | 588   | 615   | 9E-19    |      |  |   |   |   |      | 12   |
| Rheumatoid Arthritis | C0003873 | UGT1A8 | 54576 | Q9HAW9 | UDP glucuronosyltransferase family 1 member A8   | 90  | 0.588 | 0.654 | 1.31E-09 | 0.01 |  | 1 | 1 | 0 | 2012 | 2012 |
| Rheumatoid Arthritis | C0003873 | UGT1A7 | 54577 | Q9HAW7 | UDP glucuronosyltransferase family 1 member A7   | 125 | 0.555 | 0.692 | 8.66E-14 | 0.01 |  | 1 | 1 | 0 | 2012 | 2012 |
| Rheumatoid Arthritis | C0003873 | UGT1A6 | 54578 | P19224 | UDP glucuronosyltransferase family 1 member A6   | 115 | 0.566 | 0.654 | 3.05E-07 | 0.01 |  | 1 | 1 | 0 | 2012 | 2012 |
| Rheumatoid Arthritis | C0003873 | EGLN1  | 54583 | Q9GZT9 | egl-9 family hypoxia inducible factor 1          | 130 | 0.544 | 0.731 | 0.97403  | 0.01 |  | 1 | 1 | 0 | 2012 | 2012 |
| Rheumatoid Arthritis | C0003873 | PPARA  | 5465  | Q07869 | peroxisome proliferator activated receptor alpha | 408 | 0.432 | 0.85  | 0.030182 | 0.01 |  | 1 | 1 | 0 | 2019 | 2019 |
| Rheumatoid Arthritis | C0003873 | UGT1A4 | 54657 | P22310 | UDP glucuronosyltransferase family 1 member A4   | 84  | 0.595 | 0.654 | 5.98E-07 | 0.01 |  | 1 | 1 | 0 | 2012 | 2012 |

|                      |          |          |       |        |                                                |           |     |    |    |           |      |  |   |   |   |      |      |
|----------------------|----------|----------|-------|--------|------------------------------------------------|-----------|-----|----|----|-----------|------|--|---|---|---|------|------|
| Rheumatoid Arthritis | C0003873 | UGT1A1   | 54658 | P22309 | UDP glucuronosyltransferase family 1 member A1 |           | 302 | 0. | 0. | 3.26E-06  | 0.01 |  | 1 | 1 | 0 | 2012 | 2012 |
| Rheumatoid Arthritis | C0003873 | PPBP     | 5473  | P02775 | pro-platelet basic protein                     | Signaling | 111 | 0. | 0. | 0.0548739 | 0.01 |  | 1 | 1 | 0 | 2016 | 2016 |
| Rheumatoid Arthritis | C0003873 | IL17RD   | 54756 | Q8NFM7 | interleukin 17 receptor D                      |           | 82  | 0. | 0. | 1.05E-06  | 0.01 |  | 1 | 1 | 0 | 2017 | 2017 |
| Rheumatoid Arthritis | C0003873 | SAMD9    | 54809 | Q5K651 | sterile alpha motif domain containing 9        |           | 90  | 0. | 0. | 1.05E-33  | 0.01 |  | 1 | 1 | 0 | 2019 | 2019 |
| Rheumatoid Arthritis | C0003873 | QPCTL    | 54814 | Q9NXS2 | glutaminyl-peptidyl cyclotransferase like      | Enzyme    | 18  | 0. | 0. | 1.57E-08  | 0.01 |  | 1 | 1 | 0 | 2019 | 2019 |
| Rheumatoid Arthritis | C0003873 | ZCHC2    | 54877 | Q9C0B9 | zinc finger CCHC-type containing 2             |           | 9   | 0. | 0. | 0.99376   | 0.01 |  | 1 | 1 | 0 | 2009 | 2009 |
| Rheumatoid Ar        | C0003873 | UHRF1BP1 | 54887 | Q6BDS2 | UHRF1 binding protein 1                        |           | 26  | 0. | 0. | 4.47E-9   | 0.01 |  | 1 | 1 | 0 | 2016 | 2016 |

|                                                 |                          |                     |                       |            |                                                                              |                                         |         |                       |                       |                                  |          |  |   |   |   |          |                  |
|-------------------------------------------------|--------------------------|---------------------|-----------------------|------------|------------------------------------------------------------------------------|-----------------------------------------|---------|-----------------------|-----------------------|----------------------------------|----------|--|---|---|---|----------|------------------|
| thr<br>itis                                     |                          |                     |                       |            |                                                                              |                                         |         |                       |                       | 1<br>3                           |          |  |   |   |   |          |                  |
| Rh<br>eu<br>ma<br>toi<br>d<br>Ar<br>thr<br>itis | C<br>00<br>03<br>87<br>3 | CD<br>KA<br>L1      | 5<br>4<br>9<br>0<br>1 | Q5V<br>V42 | CDK5<br>regulatory<br>subunit<br>associated<br>protein 1 like 1              |                                         | 86      | 0<br>.<br>6<br>1<br>7 | 0<br>.<br>6<br>1<br>5 | 0.<br>0<br>1<br>6<br>0<br>2<br>1 | 0.<br>01 |  | 1 | 1 | 1 | 20<br>17 | 2<br>0<br>1<br>7 |
| Rh<br>eu<br>ma<br>toi<br>d<br>Ar<br>thr<br>itis | C<br>00<br>03<br>87<br>3 | PP<br>M1<br>A       | 5<br>4<br>9<br>4      | P3581<br>3 | protein<br>phospha<br>tase,<br>Mg2+/<br>Mn2+<br>depende<br>nt 1A             | En<br>zy<br>me                          | 33      | 0<br>.<br>6<br>9<br>1 | 0<br>.<br>5           | 0.<br>9<br>9<br>8<br>3<br>4      | 0.<br>01 |  | 1 | 1 | 0 | 20<br>20 | 2<br>0<br>2<br>0 |
| Rh<br>eu<br>ma<br>toi<br>d<br>Ar<br>thr<br>itis | C<br>00<br>03<br>87<br>3 | BA<br>NP            | 5<br>4<br>9<br>7<br>1 | Q8N9<br>N5 | BTG3<br>associated<br>nuclear<br>protein                                     |                                         | 27      | 0<br>.<br>7<br>4<br>3 | 0<br>.<br>2<br>6<br>9 | 0.<br>9<br>9<br>3<br>8<br>8      | 0.<br>01 |  | 1 | 1 | 0 | 20<br>15 | 2<br>0<br>1<br>5 |
| Rh<br>eu<br>ma<br>toi<br>d<br>Ar<br>thr<br>itis | C<br>00<br>03<br>87<br>3 | MA<br>RC<br>HF<br>1 | 5<br>5<br>0<br>1<br>6 | Q8TC<br>Q1 | membrane<br>associated<br>ring-CH-type<br>finger 1                           |                                         | 12<br>6 | 0<br>.<br>5<br>4      | 0<br>.<br>8<br>0<br>8 | 0.<br>0<br>0<br>8<br>6<br>7<br>8 | 0.<br>01 |  | 1 | 1 | 0 | 20<br>17 | 2<br>0<br>1<br>7 |
| Rh<br>eu<br>ma<br>toi<br>d<br>Ar<br>thr<br>itis | C<br>00<br>03<br>87<br>3 | PP<br>P1<br>R1<br>A | 5<br>5<br>0<br>2      | Q135<br>22 | protein<br>phospha<br>tase 1<br>regulato<br>ry<br>inhibitor<br>subunit<br>1A | En<br>zy<br>me<br>mo<br>dul<br>ato<br>r | 10<br>6 | 0<br>.<br>5<br>5<br>9 | 0<br>.<br>6<br>9<br>2 | 0.<br>0<br>2<br>1<br>8<br>9<br>4 | 0.<br>01 |  | 1 | 1 | 0 | 20<br>16 | 2<br>0<br>1<br>6 |
| Rh<br>eu<br>ma<br>toi<br>d<br>Ar<br>thr<br>itis | C<br>00<br>03<br>87<br>3 | TT<br>C3<br>8       | 5<br>5<br>0<br>2<br>0 | Q5R3<br>I4 | tetratricopepti<br>de repeat<br>domain 38                                    |                                         | 1       | 1                     | 0<br>.<br>1<br>1<br>5 | 3.<br>2<br>6<br>E<br>-<br>1<br>3 | 0.<br>01 |  | 1 | 1 | 0 | 20<br>17 | 2<br>0<br>1<br>7 |
| Rh<br>eu<br>ma<br>toi                           | C<br>00<br>03            | AK<br>IRI<br>N2     | 5<br>5<br>1           | Q53H<br>80 | akirin 2                                                                     |                                         | 28      | 0<br>.<br>7           | 0<br>.<br>3           | 0.<br>9<br>2<br>3                | 0.<br>01 |  | 1 | 1 | 0 | 20<br>11 | 2<br>0<br>1<br>1 |

|                                                 |                          |                      |                            |            |                                                                                                             |         |                       |                       |                                  |          |  |   |   |   |          |                  |
|-------------------------------------------------|--------------------------|----------------------|----------------------------|------------|-------------------------------------------------------------------------------------------------------------|---------|-----------------------|-----------------------|----------------------------------|----------|--|---|---|---|----------|------------------|
| d<br>Ar<br>thr<br>itis                          | 87<br>3                  |                      | 2<br>2                     |            |                                                                                                             |         | 1<br>6                | 4<br>6                | 5<br>5                           |          |  |   |   |   |          |                  |
| Rh<br>eu<br>ma<br>toi<br>d<br>Ar<br>thr<br>itis | C<br>00<br>03<br>87<br>3 | PI<br>WI<br>L2       | 5<br>5<br>1<br>2<br>4      | Q8TC<br>59 | piwi like<br>RNA-<br>mediated gene<br>silencing 2                                                           | 65      | 0<br>.<br>6<br>1<br>2 | 0<br>.<br>5<br>7<br>7 | 2.<br>7<br>1<br>E<br>-<br>0<br>8 | 0.<br>01 |  | 1 | 1 | 0 | 20<br>16 | 2<br>0<br>1<br>6 |
| Rh<br>eu<br>ma<br>toi<br>d<br>Ar<br>thr<br>itis | C<br>00<br>03<br>87<br>3 | RM<br>DN<br>3        | 5<br>5<br>1<br>7<br>7      | Q96T<br>C7 | regulator of<br>microtubule<br>dynamics 3                                                                   | 13<br>4 | 0<br>.<br>5<br>3<br>4 | 0<br>.<br>7<br>6<br>9 | 5.<br>1<br>7<br>E<br>-<br>0<br>5 | 0.<br>01 |  | 1 | 1 | 0 | 20<br>19 | 2<br>0<br>1<br>9 |
| Rh<br>eu<br>ma<br>toi<br>d<br>Ar<br>thr<br>itis | C<br>00<br>03<br>87<br>3 | NA<br>DS<br>YN<br>1  | 5<br>5<br>1<br>9<br>1      | Q6IA<br>69 | NAD<br>synthetase 1                                                                                         | 14      | 0<br>.<br>7<br>8      | 0<br>.<br>2<br>3<br>1 | 1.<br>2<br>5<br>E<br>-<br>1<br>6 | 0.<br>01 |  | 1 | 1 | 0 | 20<br>14 | 2<br>0<br>1<br>4 |
| Rh<br>eu<br>ma<br>toi<br>d<br>Ar<br>thr<br>itis | C<br>00<br>03<br>87<br>3 | TH<br>NS<br>L2       | 5<br>5<br>2<br>5<br>8      | Q86Y<br>J6 | threonine<br>synthase like 2                                                                                | 4       | 0<br>.<br>8<br>6<br>1 | 0<br>.<br>1<br>5<br>4 | 1.<br>4<br>8<br>E<br>-<br>0<br>6 | 0.<br>01 |  | 1 | 1 | 0 | 20<br>09 | 2<br>0<br>0<br>9 |
| Rh<br>eu<br>ma<br>toi<br>d<br>Ar<br>thr<br>itis | C<br>00<br>03<br>87<br>3 | KI<br>R2<br>DL<br>5B | 5<br>5<br>3<br>1<br>2<br>8 | Q8N<br>HK3 | killer cell<br>immunoglobul<br>in like<br>receptor, two<br>Ig domains<br>and long<br>cytoplasmic<br>tail 5B | 27      | 0<br>.<br>6<br>8<br>2 | 0<br>.<br>4<br>2<br>3 |                                  | 0.<br>01 |  | 1 | 1 | 0 | 20<br>15 | 2<br>0<br>1<br>5 |
| Rh<br>eu<br>ma<br>toi<br>d<br>Ar<br>thr<br>itis | C<br>00<br>03<br>87<br>3 | IM<br>PA<br>CT       | 5<br>5<br>3<br>6<br>4      | Q9P2<br>X3 | impact RWD<br>domain<br>protein                                                                             | 85      | 0<br>.<br>5<br>9<br>3 | 0<br>.<br>8<br>0<br>8 | 4.<br>8<br>3<br>E<br>-<br>0<br>8 | 0.<br>01 |  | 1 | 1 | 0 | 20<br>19 | 2<br>0<br>1<br>9 |

|                      |          |         |        |        |                                                       |             |     |       |       |          |      |  |   |   |   |      |      |
|----------------------|----------|---------|--------|--------|-------------------------------------------------------|-------------|-----|-------|-------|----------|------|--|---|---|---|------|------|
| Rheumatoid Arthritis | C0003873 | MI R448 | 554212 |        | microRNA 448                                          |             | 63  | 0.61  | 0.65  |          | 0.01 |  | 1 | 1 | 0 | 2018 | 2018 |
| Rheumatoid Arthritis | C0003873 | PRCP    | 5547   | P42785 | prolylcarboxypeptidase                                | Enzyme      | 68  | 0.633 | 0.692 | 8.76E-12 | 0.01 |  | 1 | 1 | 0 | 2009 | 2009 |
| Rheumatoid Arthritis | C0003873 | PRF1    | 5551   | P14222 | perforin 1                                            |             | 163 | 0.54  | 0.692 | 5.49E-06 | 0.01 |  | 1 | 1 | 0 | 2013 | 2013 |
| Rheumatoid Arthritis | C0003873 | SYBU    | 55638  | Q9NX95 | syntabulin                                            | Transporter | 120 | 0.546 | 0.769 | 9.77E-05 | 0.01 |  | 1 | 1 | 0 | 2019 | 2019 |
| Rheumatoid Arthritis | C0003873 | NLRP2   | 55655  | Q9NX02 | NLR family pyrin domain containing 2                  |             | 155 | 0.515 | 0.731 | 1.42E-38 | 0.01 |  | 1 | 1 | 2 | 2015 | 2015 |
| Rheumatoid Arthritis | C0003873 | ZN F334 | 55713  | Q9HCZ1 | zinc finger protein 334                               |             | 1   | 1     | 0.115 | 1.61E-09 | 0.01 |  | 1 | 1 | 0 | 2011 | 2011 |
| Rheumatoid Ar        | C0003873 | ATF7IP  | 55729  | Q6VMQ6 | activating transcription factor 7 interacting protein |             | 145 | 0.543 | 0.799 | 0.9993   | 0.01 |  | 1 | 1 | 0 | 2015 | 2015 |

|                                                 |                          |                     |                       |            |                                                                                         |                |         |                       |                       |                                  |          |  |   |   |   |          |                  |
|-------------------------------------------------|--------------------------|---------------------|-----------------------|------------|-----------------------------------------------------------------------------------------|----------------|---------|-----------------------|-----------------------|----------------------------------|----------|--|---|---|---|----------|------------------|
| thr<br>itis                                     |                          |                     |                       |            |                                                                                         |                |         |                       |                       |                                  |          |  |   |   |   |          |                  |
| Rh<br>eu<br>ma<br>toi<br>d<br>Ar<br>thr<br>itis | C<br>00<br>03<br>87<br>3 | DH<br>X3<br>2       | 5<br>5<br>7<br>6<br>0 | Q7L7<br>V1 | DEAH-<br>box<br>helicase<br>32<br>(putative<br>)                                        | En<br>zy<br>me | 20      | 0<br>.<br>7<br>6      | 0<br>.<br>2<br>6<br>9 | 1.<br>6<br>5<br>E<br>-<br>0<br>9 | 0.<br>01 |  | 1 | 1 | 0 | 20<br>15 | 2<br>0<br>1<br>5 |
| Rh<br>eu<br>ma<br>toi<br>d<br>Ar<br>thr<br>itis | C<br>00<br>03<br>87<br>3 | PA<br>G1            | 5<br>5<br>8<br>2<br>4 | Q9N<br>WQ8 | phosphoprotein<br>membrane<br>anchor with<br>glycosphingol<br>ipid<br>microdomains<br>1 |                | 17<br>4 | 0<br>.<br>5<br>0<br>5 | 0<br>.<br>8<br>0<br>8 | 0.<br>0<br>7<br>7<br>6<br>4      | 0.<br>01 |  | 1 | 1 | 0 | 20<br>18 | 2<br>0<br>1<br>8 |
| Rh<br>eu<br>ma<br>toi<br>d<br>Ar<br>thr<br>itis | C<br>00<br>03<br>87<br>3 | SE<br>LE<br>NO<br>S | 5<br>5<br>8<br>2<br>9 | Q9BQ<br>E4 | selenoprotein<br>S                                                                      |                | 55      | 0<br>.<br>6<br>2<br>8 | 0<br>.<br>6<br>1<br>5 | 1.<br>4<br>3<br>E<br>-<br>0<br>9 | 0.<br>01 |  | 1 | 1 | 0 | 20<br>09 | 2<br>0<br>0<br>9 |
| Rh<br>eu<br>ma<br>toi<br>d<br>Ar<br>thr<br>itis | C<br>00<br>03<br>87<br>3 | CE<br>NP<br>J       | 5<br>5<br>8<br>3<br>5 | Q9HC<br>77 | centrom<br>ere<br>protein J                                                             | En<br>zy<br>me | 15<br>0 | 0<br>.<br>5<br>4<br>6 | 0<br>.<br>8<br>4<br>6 | 2.<br>0<br>6<br>E<br>-<br>2<br>7 | 0.<br>01 |  | 1 | 1 | 0 | 20<br>08 | 2<br>0<br>0<br>8 |
| Rh<br>eu<br>ma<br>toi<br>d<br>Ar<br>thr<br>itis | C<br>00<br>03<br>87<br>3 | PK<br>N1            | 5<br>5<br>8<br>5      | Q165<br>12 | protein<br>kinase<br>N1                                                                 | Ki<br>nas<br>e | 48      | 0<br>.<br>6<br>4<br>7 | 0<br>.<br>6<br>9<br>2 | 0.<br>2<br>0<br>4<br>4<br>2      | 0.<br>01 |  | 1 | 1 | 0 | 20<br>12 | 2<br>0<br>1<br>2 |
| Rh<br>eu<br>ma<br>toi<br>d<br>Ar<br>thr<br>itis | C<br>00<br>03<br>87<br>3 | PR<br>KC<br>Z       | 5<br>5<br>9<br>0      | Q055<br>13 | protein<br>kinase C<br>zeta                                                             | Ki<br>nas<br>e | 88      | 0<br>.<br>6<br>0<br>4 | 0<br>.<br>6<br>5<br>4 | 0.<br>5<br>4<br>1                | 0.<br>01 |  | 1 | 1 | 0 | 20<br>08 | 2<br>0<br>0<br>8 |
| Rh<br>eu<br>ma<br>toi                           | C<br>00<br>03            | MA<br>PK<br>9       | 5<br>6<br>0<br>1      | P4598<br>4 | mitogen<br>-<br>activate                                                                | Ki<br>nas<br>e | 11<br>5 | 0<br>.<br>5           | 0<br>.<br>7           | 0.<br>0<br>6<br>9                | 0.<br>01 |  | 1 | 1 | 0 | 20<br>07 | 2<br>0<br>0<br>7 |

|                      |          |          |       |        |                                                           |             |     |       |       |          |      |  |   |   |   |      |      |
|----------------------|----------|----------|-------|--------|-----------------------------------------------------------|-------------|-----|-------|-------|----------|------|--|---|---|---|------|------|
| d Arthritis          | 873      |          |       |        | d protein kinase 9                                        |             |     | 61    | 31    | 738      |      |  |   |   |   |      |      |
| Rheumatoid Arthritis | C0003873 | MA PK10  | 5602  | P53779 | mitogen-activated protein kinase 10                       | Kinase      | 75  | 0.606 | 0.692 | 0.2753   | 0.01 |  | 1 | 1 | 0 | 2019 | 2019 |
| Rheumatoid Arthritis | C0003873 | MA PK13  | 5603  | O15264 | mitogen-activated protein kinase 13                       | Kinase      | 26  | 0.705 | 0.577 | 6.72E-11 | 0.01 |  | 1 | 1 | 0 | 2004 | 2004 |
| Rheumatoid Arthritis | C0003873 | EIF2A K2 | 5610  | P19525 | eukaryotic translation initiation factor 2 alpha kinase 2 | Kinase      | 142 | 0.538 | 0.769 | 0.01643  | 0.01 |  | 1 | 1 | 0 | 2015 | 2015 |
| Rheumatoid Arthritis | C0003873 | ANKH     | 56172 | Q9HCJ1 | ANKH inorganic pyrophosphate transport regulator          | Transporter | 89  | 0.606 | 0.692 | 0.2756   | 0.01 |  | 1 | 1 | 0 | 2007 | 2007 |
| Rheumatoid Arthritis | C0003873 | PROP1    | 5626  | O75360 | PROP paired-like homeobox 1                               |             | 117 | 0.576 | 0.615 | 0.08746  | 0.01 |  | 1 | 1 | 0 | 2018 | 2018 |
| Rheumatoid Arthritis | C0003873 | AZGP1    | 563   | P25311 | alpha-2-glycoprotein 1, zinc-binding                      |             | 101 | 0.566 | 0.769 | 4.15E-06 | 0.01 |  | 1 | 1 | 0 | 2017 | 2017 |



|                      |          |           |       |        |                                                |                            |     |       |       |          |      |  |   |   |   |      |      |
|----------------------|----------|-----------|-------|--------|------------------------------------------------|----------------------------|-----|-------|-------|----------|------|--|---|---|---|------|------|
| Rheumatoid Arthritis | C0003873 | ME T3 L3  | 56339 | Q86U44 | methyltransferase like 3                       |                            | 79  | 0.585 | 0.58  | 1.8E-07  | 0.01 |  | 1 | 1 | 0 | 2019 | 2019 |
| Rheumatoid Arthritis | C0003873 | PP AN     | 56342 | Q9NQ55 | peter pan homolog                              |                            | 18  | 0.729 | 0.577 | 1.72E-12 | 0.01 |  | 1 | 1 | 0 | 2019 | 2019 |
| Rheumatoid Arthritis | C0003873 | LT B4 R2  | 56413 | Q9NPC1 | leukotriene B4 receptor 2                      | G-protein coupled receptor | 49  | 0.631 | 0.615 | 1.38E-05 | 0.01 |  | 1 | 1 | 0 | 2003 | 2003 |
| Rheumatoid Arthritis | C0003873 | PR SS2    | 5645  | P07478 | serine protease 2                              | Enzyme                     | 66  | 0.628 | 0.769 |          | 0.01 |  | 1 | 1 | 0 | 2005 | 2005 |
| Rheumatoid Arthritis | C0003873 | MA SP1    | 5648  | P48740 | mannan binding lectin serine peptidase 1       | Enzyme                     | 123 | 0.565 | 0.885 | 1.23E-11 | 0.01 |  | 1 | 1 | 0 | 2016 | 2016 |
| Rheumatoid Arthritis | C0003873 | CY P26 B1 | 56603 | Q9NR63 | cytochrome P450 family 26 subfamily B member 1 | Enzyme                     | 36  | 0.666 | 0.598 | 0.9787   | 0.01 |  | 1 | 1 | 0 | 2018 | 2018 |
| Rheumatoid           | C0003    | PS EN 1   | 5663  | P49768 | presenilin 1                                   | Enzyme                     | 369 | 0.4   | 0.8   | 0.973    | 0.01 |  | 1 | 1 | 1 | 1998 | 1998 |

|                                                 |                          |                |                       |            |                                                                              |                                             |         |                       |                       |                                  |          |  |   |   |   |          |                  |
|-------------------------------------------------|--------------------------|----------------|-----------------------|------------|------------------------------------------------------------------------------|---------------------------------------------|---------|-----------------------|-----------------------|----------------------------------|----------|--|---|---|---|----------|------------------|
| d<br>Ar<br>thr<br>itis                          | 87<br>3                  |                |                       |            |                                                                              |                                             |         | 6<br>9                | 4<br>6                | 2<br>2                           |          |  |   |   |   |          |                  |
| Rh<br>eu<br>ma<br>toi<br>d<br>Ar<br>thr<br>itis | C<br>00<br>03<br>87<br>3 | SA<br>R1<br>A  | 5<br>6<br>6<br>8<br>1 | Q9NR<br>31 | secretion<br>associated Ras<br>related<br>GTPase 1A                          |                                             | 25      | 0<br>.<br>7<br>4<br>3 | 0<br>.<br>5<br>3<br>8 | 0.<br>3<br>7<br>1<br>7<br>8      | 0.<br>01 |  | 1 | 1 | 0 | 20<br>07 | 2<br>0<br>0<br>7 |
| Rh<br>eu<br>ma<br>toi<br>d<br>Ar<br>thr<br>itis | C<br>00<br>03<br>87<br>3 | SP<br>HK<br>2  | 5<br>6<br>8<br>4<br>8 | Q9NR<br>A0 | sphingos<br>ine<br>kinase 2                                                  | Ki<br>nas<br>e                              | 14<br>0 | 0<br>.<br>5<br>4<br>6 | 0<br>.<br>7<br>3<br>1 | 1.<br>2<br>8<br>E<br>-<br>0<br>7 | 0.<br>01 |  | 1 | 1 | 0 | 20<br>09 | 2<br>0<br>0<br>9 |
| Rh<br>eu<br>ma<br>toi<br>d<br>Ar<br>thr<br>itis | C<br>00<br>03<br>87<br>3 | PS<br>MB<br>5  | 5<br>6<br>9<br>3      | P2807<br>4 | proteasome<br>20S subunit<br>beta 5                                          |                                             | 27      | 0<br>.<br>7<br>1<br>1 | 0<br>.<br>3<br>8<br>5 | 0.<br>9<br>5<br>8<br>9<br>3      | 0.<br>01 |  | 1 | 1 | 0 | 20<br>12 | 2<br>0<br>1<br>2 |
| Rh<br>eu<br>ma<br>toi<br>d<br>Ar<br>thr<br>itis | C<br>00<br>03<br>87<br>3 | AR<br>NT<br>L2 | 5<br>6<br>9<br>3<br>8 | Q8W<br>YA1 | aryl<br>hydrocar<br>bon<br>receptor<br>nuclear<br>transloc<br>ator like<br>2 | Tr<br>ans<br>cri<br>pti<br>on<br>fac<br>tor | 41      | 0<br>.<br>6<br>4<br>4 | 0<br>.<br>6<br>5<br>4 | 6.<br>0<br>4<br>E<br>-<br>1<br>0 | 0.<br>01 |  | 1 | 1 | 0 | 20<br>15 | 2<br>0<br>1<br>5 |
| Rh<br>eu<br>ma<br>toi<br>d<br>Ar<br>thr<br>itis | C<br>00<br>03<br>87<br>3 | PS<br>MB<br>6  | 5<br>6<br>9<br>4      | P2807<br>2 | proteasome<br>20S subunit<br>beta 6                                          |                                             | 10<br>0 | 0<br>.<br>5<br>6<br>1 | 0<br>.<br>7<br>3<br>1 | 0.<br>0<br>1<br>5<br>7<br>7<br>9 | 0.<br>01 |  | 1 | 1 | 0 | 19<br>90 | 1<br>9<br>9<br>0 |
| Rh<br>eu<br>ma<br>toi<br>d<br>Ar<br>thr<br>itis | C<br>00<br>03<br>87<br>3 | DU<br>SP2<br>2 | 5<br>6<br>9<br>4<br>0 | Q9NR<br>W4 | dual<br>specificity<br>phosphatase<br>22                                     |                                             | 40      | 0<br>.<br>6<br>5<br>9 | 0<br>.<br>6<br>1<br>5 | 0.<br>0<br>0<br>9<br>3<br>4<br>2 | 0.<br>01 |  | 1 | 1 | 0 | 20<br>18 | 2<br>0<br>1<br>8 |

|                      |          |         |       |        |                                                          |               |     |       |       |         |      |  |   |   |   |      |      |
|----------------------|----------|---------|-------|--------|----------------------------------------------------------|---------------|-----|-------|-------|---------|------|--|---|---|---|------|------|
| Rheumatoid Arthritis | C0003873 | PRDM8   | 56978 | Q9NQV8 | PR/SET domain 8                                          |               | 39  | 0.678 | 0.462 | 0.776   | 0.01 |  | 1 | 1 | 0 | 2019 | 2019 |
| Rheumatoid Arthritis | C0003873 | ADAMTS9 | 56999 | Q9P2N4 | ADAM metallopeptidase with thrombospondin type 1 motif 9 | Enzyme        | 53  | 0.633 | 0.692 | 1E-06   | 0.01 |  | 1 | 1 | 0 | 2018 | 2018 |
| Rheumatoid Arthritis | C0003873 | PCBP4   | 57060 | P57723 | poly(rC) binding protein 4                               | Enzyme        | 147 | 0.523 | 0.808 | 0.02371 | 0.01 |  | 1 | 1 | 0 | 2018 | 2018 |
| Rheumatoid Arthritis | C0003873 | PCNP    | 57092 | Q8WW12 | PEST proteolytic signal containing nuclear protein       |               | 11  | 0.839 | 0.192 | 0.7853  | 0.01 |  | 1 | 1 | 0 | 2017 | 2017 |
| Rheumatoid Arthritis | C0003873 | PNPLA2  | 57104 | Q96AD5 | patatin like phospholipase domain containing 2           | Enzyme        | 199 | 0.511 | 0.846 | 0.0407  | 0.01 |  | 1 | 1 | 0 | 2017 | 2017 |
| Rheumatoid Arthritis | C0003873 | CD248   | 57124 | Q9HCU0 | CD248 molecule                                           |               | 76  | 0.615 | 0.570 | 0.59017 | 0.01 |  | 1 | 1 | 0 | 2010 | 2010 |
| Rheumatoid Ar        | C0003873 | PSMD9   | 5715  | O00233 | proteasome 26S subunit, non-ATPase 9                     | Enzyme module | 344 | 0.435 | 0.846 | 4.8E-6  | 0.01 |  | 1 | 1 | 0 | 2005 | 2005 |

|                      |          |          |       |        |                                                                                       |                            |     |       |        |        |      |  |   |   |   |      |      |
|----------------------|----------|----------|-------|--------|---------------------------------------------------------------------------------------|----------------------------|-----|-------|--------|--------|------|--|---|---|---|------|------|
| thritis              |          |          |       |        |                                                                                       | ator                       |     |       |        | 06     |      |  |   |   |   |      |      |
| Rheumatoid Arthritis | C0003873 | SLURP1   | 57152 | P5500  | secreted LY6/PLAUR domain containing 1                                                |                            | 105 | 0.56  | 0.654  | 0.2534 | 0.01 |  | 1 | 1 | 0 | 2019 | 2019 |
| Rheumatoid Arthritis | C0003873 | PTBP1    | 5725  | P2659  | polypyrimidine tract binding protein 1                                                |                            | 172 | 0.517 | 0.769  | 0.9961 | 0.01 |  | 1 | 1 | 0 | 1996 | 1996 |
| Rheumatoid Arthritis | C0003873 | KIR2DL5A | 57292 | Q8N109 | killer cell immunoglobulin like receptor, two Ig domains and long cytoplasmic tail 5A | Receptor                   | 21  | 0.711 | 0.423  |        | 0.01 |  | 1 | 1 | 0 | 2015 | 2015 |
| Rheumatoid Arthritis | C0003873 | PTGER2   | 5732  | P43116 | prostaglandin E receptor 2                                                            | G-protein coupled receptor | 79  | 0.597 | 0.731  | 0.0749 | 0.01 |  | 1 | 1 | 0 | 2009 | 2009 |
| Rheumatoid Arthritis | C0003873 | PTGER4   | 5734  | P35408 | prostaglandin E receptor 4                                                            | G-protein coupled receptor | 120 | 0.558 | 0.7315 | 0.9755 | 0.01 |  | 1 | 1 | 0 | 2015 | 2015 |
| Rheumatoid           | C0003    | MIR363   | 5740  |        | microRNA 363                                                                          |                            | 83  | 0.5   | 0.6    |        | 0.01 |  | 1 | 1 | 0 | 2017 | 2017 |

|                                                 |                          |                     |                            |            |                                               |                |        |                       |                       |                                  |          |  |   |   |   |          |                  |
|-------------------------------------------------|--------------------------|---------------------|----------------------------|------------|-----------------------------------------------|----------------|--------|-----------------------|-----------------------|----------------------------------|----------|--|---|---|---|----------|------------------|
| d<br>Ar<br>thr<br>itis                          | 87<br>3                  |                     | 3<br>1                     |            |                                               |                | 7<br>8 | 9<br>2                |                       |                                  |          |  |   |   |   |          |                  |
| Rh<br>eu<br>ma<br>toi<br>d<br>Ar<br>thr<br>itis | C<br>00<br>03<br>87<br>3 | AB<br>HD<br>6       | 5<br>7<br>4<br>0<br>6      | Q9BV<br>23 | abhydrol<br>ase<br>domain<br>containi<br>ng 6 | En<br>zy<br>me | 24     | 0<br>.<br>7<br>5<br>1 | 0<br>.<br>3<br>8<br>5 | 2.<br>2<br>3<br>E<br>-<br>0<br>5 | 0.<br>01 |  | 1 | 1 | 0 | 20<br>17 | 2<br>0<br>1<br>7 |
| Rh<br>eu<br>ma<br>toi<br>d<br>Ar<br>thr<br>itis | C<br>00<br>03<br>87<br>3 | MI<br>R4<br>32      | 5<br>7<br>4<br>4<br>5<br>1 |            | microRNA<br>432                               |                | 44     | 0<br>.<br>6<br>4<br>4 | 0<br>.<br>5<br>7<br>7 |                                  | 0.<br>01 |  | 1 | 1 | 0 | 20<br>18 | 2<br>0<br>1<br>8 |
| Rh<br>eu<br>ma<br>toi<br>d<br>Ar<br>thr<br>itis | C<br>00<br>03<br>87<br>3 | MI<br>R1<br>81<br>D | 5<br>7<br>4<br>4<br>5<br>7 |            | microRNA<br>181d                              |                | 44     | 0<br>.<br>6<br>4<br>1 | 0<br>.<br>6<br>5<br>4 |                                  | 0.<br>01 |  | 1 | 1 | 0 | 20<br>15 | 2<br>0<br>1<br>5 |
| Rh<br>eu<br>ma<br>toi<br>d<br>Ar<br>thr<br>itis | C<br>00<br>03<br>87<br>3 | MI<br>R4<br>98      | 5<br>7<br>4<br>4<br>6<br>0 |            | microRNA<br>498                               |                | 49     | 0<br>.<br>6<br>3<br>3 | 0<br>.<br>5           |                                  | 0.<br>01 |  | 1 | 1 | 0 | 20<br>19 | 2<br>0<br>1<br>9 |
| Rh<br>eu<br>ma<br>toi<br>d<br>Ar<br>thr<br>itis | C<br>00<br>03<br>87<br>3 | MI<br>R5<br>22      | 5<br>7<br>4<br>4<br>9<br>5 |            | microRNA<br>522                               |                | 21     | 0<br>.<br>7<br>2<br>2 | 0<br>.<br>3<br>4<br>6 |                                  | 0.<br>01 |  | 1 | 1 | 0 | 20<br>18 | 2<br>0<br>1<br>8 |
| Rh<br>eu<br>ma<br>toi<br>d<br>Ar<br>thr<br>itis | C<br>00<br>03<br>87<br>3 | MI<br>R5<br>06      | 5<br>7<br>4<br>5<br>1<br>1 |            | microRNA<br>506                               |                | 76     | 0<br>.<br>5<br>8<br>5 | 0<br>.<br>6<br>1<br>5 |                                  | 0.<br>01 |  | 1 | 1 | 0 | 20<br>19 | 2<br>0<br>1<br>9 |

|                      |          |         |       |        |                                              |                  |     |       |       |          |      |  |   |   |   |      |      |
|----------------------|----------|---------|-------|--------|----------------------------------------------|------------------|-----|-------|-------|----------|------|--|---|---|---|------|------|
| Rheumatoid Arthritis | C0003873 | REXO1   | 57455 | Q8N1G1 | RNA exonuclease 1 homolog                    | Enzyme           | 30  | 0.695 | 0.346 | 0.984    | 0.01 |  | 1 | 1 | 0 | 2010 | 2010 |
| Rheumatoid Arthritis | C0003873 | SRGAP1  | 57522 | Q7Z6B7 | SLIT-ROBO Rho GTPase activating protein 1    | Enzyme modulator | 29  | 0.686 | 0.598 | 0.9945   | 0.01 |  | 1 | 1 | 0 | 2018 | 2018 |
| Rheumatoid Arthritis | C0003873 | PTMA    | 5757  | P06454 | prothymosin alpha                            |                  | 71  | 0.604 | 0.731 | 0.03451  | 0.01 |  | 1 | 1 | 0 | 2007 | 2007 |
| Rheumatoid Arthritis | C0003873 | PTMAP4  | 5761  |        | prothymosin alpha pseudogene 4               |                  | 49  | 0.638 | 0.731 |          | 0.01 |  | 1 | 1 | 0 | 2007 | 2007 |
| Rheumatoid Arthritis | C0003873 | EPB41L5 | 57669 | Q9HCM4 | erythrocyte membrane protein band 4.1 like 5 |                  | 16  | 0.78  | 0.346 | 0.020795 | 0.01 |  | 1 | 1 | 0 | 2018 | 2018 |
| Rheumatoid Arthritis | C0003873 | MAGEE1  | 57692 | Q9HC15 | MAGE family member E1                        | Cell adhesion    | 19  | 0.736 | 0.423 | 0.97046  | 0.01 |  | 1 | 1 | 0 | 2006 | 2006 |
| Rheumatoid Ar        | C0003873 | GRHL3   | 57822 | Q8TE85 | grainyhead like transcription factor 3       | Transcription    | 106 | 0.572 | 0.692 | 0.99292  | 0.01 |  | 1 | 1 | 0 | 1997 | 1997 |

| thr<br>itis                                     |                          |                |                       |            |                                                               | fac<br>tor        |         |                       |                       |                                  |          |  |   |   |   |          |                  |
|-------------------------------------------------|--------------------------|----------------|-----------------------|------------|---------------------------------------------------------------|-------------------|---------|-----------------------|-----------------------|----------------------------------|----------|--|---|---|---|----------|------------------|
| Rh<br>eu<br>ma<br>toi<br>d<br>Ar<br>thr<br>itis | C<br>00<br>03<br>87<br>3 | PT<br>PN<br>14 | 5<br>7<br>8<br>4      | Q156<br>78 | protein<br>tyrosine<br>phosphatase<br>non-receptor<br>type 14 |                   | 48      | 0<br>.<br>6<br>3<br>8 | 0<br>.<br>6<br>1<br>5 | 0.<br>2<br>2<br>0<br>5<br>5      | 0.<br>01 |  | 1 | 1 | 0 | 20<br>19 | 2<br>0<br>1<br>9 |
| Rh<br>eu<br>ma<br>toi<br>d<br>Ar<br>thr<br>itis | C<br>00<br>03<br>87<br>3 | MU<br>C3<br>B  | 5<br>7<br>8<br>7<br>6 | Q9H1<br>95 | mucin 3B, cell<br>surface<br>associated                       |                   | 41      | 0<br>.<br>6<br>6<br>6 | 0<br>.<br>4<br>6<br>2 |                                  | 0.<br>01 |  | 1 | 1 | 0 | 20<br>08 | 2<br>0<br>0<br>8 |
| Rh<br>eu<br>ma<br>toi<br>d<br>Ar<br>thr<br>itis | C<br>00<br>03<br>87<br>3 | PT<br>PRJ      | 5<br>7<br>9<br>5      | Q129<br>13 | protein<br>tyrosine<br>phospha<br>tase<br>receptor<br>type J  | En<br>zy<br>me    | 79      | 0<br>.<br>6<br>0<br>6 | 0<br>.<br>6<br>1<br>5 | 1.<br>2<br>9<br>E<br>-<br>1<br>1 | 0.<br>01 |  | 1 | 1 | 0 | 20<br>13 | 2<br>0<br>1<br>3 |
| Rh<br>eu<br>ma<br>toi<br>d<br>Ar<br>thr<br>itis | C<br>00<br>03<br>87<br>3 | PT<br>PR<br>K  | 5<br>7<br>9<br>6      | Q152<br>62 | protein<br>tyrosine<br>phospha<br>tase<br>receptor<br>type K  | En<br>zy<br>me    | 34      | 0<br>.<br>6<br>8<br>6 | 0<br>.<br>3<br>8<br>5 | 0.<br>9<br>0<br>2<br>9<br>1      | 0.<br>01 |  | 1 | 1 | 0 | 20<br>16 | 2<br>0<br>1<br>6 |
| Rh<br>eu<br>ma<br>toi<br>d<br>Ar<br>thr<br>itis | C<br>00<br>03<br>87<br>3 | BA<br>X        | 5<br>8<br>1           | Q078<br>12 | BCL2<br>associat<br>ed X,<br>apoptosi<br>s<br>regulato<br>r   | Sig<br>nal<br>ing | 42<br>0 | 0<br>.<br>4<br>1<br>7 | 0<br>.<br>8<br>8<br>5 | 0.<br>3<br>1<br>7<br>4<br>6      | 0.<br>01 |  | 0 | 1 | 0 | 19<br>99 | 1<br>9<br>9<br>9 |
| Rh<br>eu<br>ma<br>toi<br>d<br>Ar<br>thr<br>itis | C<br>00<br>03<br>87<br>3 | RB<br>PJP<br>4 | 5<br>8<br>1<br>6<br>3 |            | RBPJ<br>pseudogene 4                                          |                   | 12      | 0<br>.<br>8<br>0<br>5 | 0<br>.<br>4<br>2<br>3 |                                  | 0.<br>01 |  | 1 | 1 | 0 | 20<br>06 | 2<br>0<br>0<br>6 |
| Rh<br>eu<br>ma<br>toi                           | C<br>00<br>03            | JA<br>M2       | 5<br>8<br>4           | P5708<br>7 | junctional<br>adhesion<br>molecule 2                          |                   | 17      | 0<br>.<br>7           | 0<br>.<br>4           | 0.<br>0<br>0<br>6                | 0.<br>01 |  | 0 | 1 | 1 | 20<br>14 | 2<br>0<br>1<br>4 |

|                                                 |                          |                 |                       |            |                                                      |                                         |         |                       |                       |                                  |          |  |   |   |   |          |                  |
|-------------------------------------------------|--------------------------|-----------------|-----------------------|------------|------------------------------------------------------|-----------------------------------------|---------|-----------------------|-----------------------|----------------------------------|----------|--|---|---|---|----------|------------------|
| d<br>Ar<br>thr<br>itis                          | 87<br>3                  |                 | 9<br>4                |            |                                                      |                                         |         | 3<br>6                | 6<br>2                | 1<br>5<br>5                      |          |  |   |   |   |          |                  |
| Rh<br>eu<br>ma<br>toi<br>d<br>Ar<br>thr<br>itis | C<br>00<br>03<br>87<br>3 | RA<br>G1        | 5<br>8<br>9<br>6      | P1591<br>8 | recombi<br>nation<br>activatin<br>g 1                | En<br>zy<br>me                          | 20<br>9 | 0<br>.<br>5<br>0<br>9 | 0<br>.<br>7<br>6<br>9 | 2.<br>7<br>7<br>E<br>-<br>0<br>5 | 0.<br>01 |  | 1 | 1 | 0 | 20<br>09 | 2<br>0<br>0<br>9 |
| Rh<br>eu<br>ma<br>toi<br>d<br>Ar<br>thr<br>itis | C<br>00<br>03<br>87<br>3 | RA<br>G2        | 5<br>8<br>9<br>7      | P5589<br>5 | recombination<br>activating 2                        |                                         | 20<br>7 | 0<br>.<br>5<br>0<br>7 | 0<br>.<br>7<br>6<br>9 | 0.<br>0<br>2<br>0<br>2<br>8<br>7 | 0.<br>01 |  | 1 | 1 | 0 | 20<br>09 | 2<br>0<br>0<br>9 |
| Rh<br>eu<br>ma<br>toi<br>d<br>Ar<br>thr<br>itis | C<br>00<br>03<br>87<br>3 | IL2<br>2R<br>A1 | 5<br>8<br>9<br>8<br>5 | Q8N6<br>P7 | interleuk<br>in 22<br>receptor<br>subunit<br>alpha 1 | Re<br>ce<br>pto<br>r                    | 28      | 0<br>.<br>6<br>8<br>2 | 0<br>.<br>5<br>3<br>8 | 0.<br>0<br>5<br>6<br>8<br>6      | 0.<br>01 |  | 1 | 1 | 0 | 20<br>18 | 2<br>0<br>1<br>8 |
| Rh<br>eu<br>ma<br>toi<br>d<br>Ar<br>thr<br>itis | C<br>00<br>03<br>87<br>3 | AC<br>TA<br>2   | 5<br>9                | P6273<br>6 | actin<br>alpha 2,<br>smooth<br>muscle                | Ce<br>llul<br>ar<br>str<br>uct<br>ure   | 20<br>0 | 0<br>.<br>5<br>0<br>8 | 0<br>.<br>8<br>4<br>6 | 0.<br>9<br>3<br>0<br>1<br>7      | 0.<br>01 |  | 1 | 1 | 2 | 20<br>19 | 2<br>0<br>1<br>9 |
| Rh<br>eu<br>ma<br>toi<br>d<br>Ar<br>thr<br>itis | C<br>00<br>03<br>87<br>3 | RA<br>P1<br>A   | 5<br>9<br>0<br>6      | P6283<br>4 | RAP1A,<br>member<br>of RAS<br>oncogen<br>e family    | En<br>zy<br>me<br>mo<br>dul<br>ato<br>r | 21<br>5 | 0<br>.<br>5<br>0<br>2 | 0<br>.<br>8<br>0<br>8 | 0.<br>6<br>2<br>2<br>7           | 0.<br>01 |  | 1 | 1 | 0 | 20<br>06 | 2<br>0<br>0<br>6 |
| Rh<br>eu<br>ma<br>toi<br>d<br>Ar<br>thr<br>itis | C<br>00<br>03<br>87<br>3 | RA<br>RG        | 5<br>9<br>1<br>6      | P1363<br>1 | retinoic<br>acid<br>receptor<br>gamma                | Nu<br>cle<br>ar<br>rec<br>ept<br>or     | 62      | 0<br>.<br>6<br>0<br>8 | 0<br>.<br>7<br>3<br>1 | 0.<br>9<br>9<br>4<br>7<br>8      | 0.<br>01 |  | 1 | 1 | 0 | 20<br>15 | 2<br>0<br>1<br>5 |



|                      |          |        |       |        |                                                                  |                            |     |       |       |          |      |  |   |   |   |      |      |
|----------------------|----------|--------|-------|--------|------------------------------------------------------------------|----------------------------|-----|-------|-------|----------|------|--|---|---|---|------|------|
| Rheumatoid Arthritis | C0003873 | HIVEP3 | 59269 | Q5T1R4 | HIVEP finger 3                                                   | zinc                       | 31  | 0.722 | 0.462 | 0.90584  | 0.01 |  | 1 | 1 | 0 | 2016 | 2016 |
| Rheumatoid Arthritis | C0003873 | TRPV4  | 59341 | Q9HBA0 | transient receptor potential cation channel subfamily V member 4 | Ion channel                | 422 | 0.457 | 0.808 | 2.24E-16 | 0.01 |  | 1 | 1 | 0 | 2017 | 2017 |
| Rheumatoid Arthritis | C0003873 | PBOV1  | 59351 | Q9GZY1 | prostate and breast cancer overexpressed 1                       |                            | 21  | 0.743 | 0.308 |          | 0.01 |  | 1 | 1 | 0 | 2018 | 2018 |
| Rheumatoid Arthritis | C0003873 | RBP4   | 5950  | P02753 | retinol binding protein 4                                        | Transporter                | 217 | 0.493 | 0.808 | 0.51951  | 0.01 |  | 1 | 1 | 0 | 2019 | 2019 |
| Rheumatoid Arthritis | C0003873 | OPN1LW | 5956  | P04000 | opsin 1, long wave sensitive                                     | G-protein coupled receptor | 197 | 0.497 | 0.808 | 0.90535  | 0.01 |  | 1 | 1 | 0 | 2018 | 2018 |
| Rheumatoid Arthritis | C0003873 | RET    | 5979  | P07949 | ret proto-oncogene                                               | Kinase                     | 607 | 0.392 | 0.885 | 1        | 0.01 |  | 1 | 1 | 0 | 1995 | 1995 |
| Rheumatoid Arthritis | C0003873 | BCL2L1 | 598   | Q07817 | BCL2 like 1                                                      | Signaling                  | 212 | 0.4   | 0.8   | 0.93     | 0.01 |  | 1 | 1 | 0 | 2006 | 2006 |

|                                                 |                          |               |                  |            |                                                                       |                                         |         |                       |                                      |                                  |          |  |   |   |   |          |                  |
|-------------------------------------------------|--------------------------|---------------|------------------|------------|-----------------------------------------------------------------------|-----------------------------------------|---------|-----------------------|--------------------------------------|----------------------------------|----------|--|---|---|---|----------|------------------|
| to<br>id<br>Ar<br>thr<br>itis                   | 87<br>3                  |               |                  |            |                                                                       |                                         |         | 9<br>3                | 8<br>5                               | 6<br>6<br>7                      |          |  |   |   |   |          | 0<br>6           |
| Rh<br>eu<br>ma<br>toi<br>d<br>Ar<br>thr<br>itis | C<br>00<br>03<br>87<br>3 | RE<br>V3<br>L | 5<br>9<br>8<br>0 | O606<br>73 | REV3 like,<br>DNA directed<br>polymerase<br>zeta catalytic<br>subunit |                                         | 95      | 0<br>.<br>5<br>8<br>8 | 0<br>.<br>6<br>5<br>4                | 1                                | 0.<br>01 |  | 1 | 1 | 0 | 20<br>14 | 2<br>0<br>1<br>4 |
| Rh<br>eu<br>ma<br>toi<br>d<br>Ar<br>thr<br>itis | C<br>00<br>03<br>87<br>3 | RG<br>S1      | 5<br>9<br>9<br>6 | Q081<br>16 | regulato<br>r of G<br>protein<br>signalin<br>g 1                      | En<br>zy<br>me<br>mo<br>dul<br>ato<br>r | 47      | 0<br>.<br>6<br>5<br>3 | 0<br>.<br>7<br>3<br>1<br>7<br>8      | 0.<br>7<br>8<br>1<br>7<br>8      | 0.<br>01 |  | 1 | 1 | 0 | 20<br>19 | 2<br>0<br>1<br>9 |
| Rh<br>eu<br>ma<br>toi<br>d<br>Ar<br>thr<br>itis | C<br>00<br>03<br>87<br>3 | RG<br>S12     | 6<br>0<br>0<br>2 | O149<br>24 | regulator of G<br>protein<br>signaling 12                             |                                         | 22      | 0<br>.<br>7<br>6<br>9 | 0<br>.<br>4<br>6<br>2                | 4.<br>0<br>9<br>E<br>-<br>0<br>9 | 0.<br>01 |  | 1 | 1 | 0 | 20<br>15 | 2<br>0<br>1<br>5 |
| Rh<br>eu<br>ma<br>toi<br>d<br>Ar<br>thr<br>itis | C<br>00<br>03<br>87<br>3 | RH<br>CE      | 6<br>0<br>0<br>6 | P1857<br>7 | Rh blood<br>group CcEe<br>antigens                                    |                                         | 44      | 0<br>.<br>6<br>6<br>6 | 0<br>.<br>5<br>0<br>1<br>1<br>6<br>3 | 0.<br>0<br>0<br>1<br>6<br>3      | 0.<br>01 |  | 1 | 1 | 0 | 20<br>18 | 2<br>0<br>1<br>8 |
| Rh<br>eu<br>ma<br>toi<br>d<br>Ar<br>thr<br>itis | C<br>00<br>03<br>87<br>3 | GR<br>K1      | 6<br>0<br>1<br>1 | Q158<br>35 | G<br>protein-<br>coupled<br>receptor<br>kinase 1                      | Ki<br>nas<br>e                          | 26      | 0<br>.<br>6<br>9<br>5 | 0<br>.<br>4<br>2<br>3                | 3.<br>0<br>7<br>E<br>-<br>0<br>5 | 0.<br>01 |  | 1 | 1 | 0 | 19<br>99 | 1<br>9<br>9<br>9 |
| Rh<br>eu<br>ma<br>toi<br>d<br>Ar<br>thr<br>itis | C<br>00<br>03<br>87<br>3 | BC<br>L3      | 6<br>0<br>2      | P2074<br>9 | BCL3<br>transcription<br>coactivator                                  |                                         | 13<br>6 | 0<br>.<br>5<br>4<br>1 | 0<br>.<br>7<br>3<br>1                | 0.<br>9<br>8<br>8<br>7<br>1      | 0.<br>01 |  | 1 | 1 | 0 | 20<br>15 | 2<br>0<br>1<br>5 |

|                      |          |          |       |        |                                                                |     |       |          |          |      |  |   |   |   |      |      |
|----------------------|----------|----------|-------|--------|----------------------------------------------------------------|-----|-------|----------|----------|------|--|---|---|---|------|------|
| Rheumatoid Arthritis | C0003873 | RM RP    | 6023  |        | RNA component of mitochondrial RNA processing endoribonuclease | 239 | 0.519 | 0.731    |          | 0.01 |  | 1 | 1 | 0 | 2019 | 2019 |
| Rheumatoid Arthritis | C0003873 | RN AS E1 | 6035  | P07998 | ribonuclease A family member 1, pancreatic                     | 68  | 0.604 | 0.692    | 0.025608 | 0.01 |  | 1 | 1 | 0 | 2016 | 2016 |
| Rheumatoid Arthritis | C0003873 | RN AS E3 | 6037  | P12724 | ribonuclease A family member 3                                 | 207 | 0.49  | 0.808    |          | 0.01 |  | 1 | 1 | 0 | 2004 | 2004 |
| Rheumatoid Arthritis | C0003873 | EX OC 4  | 60412 | Q96A65 | exocyst complex component 4                                    | 20  | 0.743 | 0.51E-13 | 3.41     | 0.01 |  | 1 | 1 | 0 | 2005 | 2005 |
| Rheumatoid Arthritis | C0003873 | BR D2    | 6046  | P25440 | bromodomain containing 2                                       | 303 | 0.45  | 0.808    | 0.9957   | 0.01 |  | 1 | 1 | 0 | 2016 | 2016 |
| Rheumatoid Arthritis | C0003873 | SL C5 A7 | 60482 | Q9GZV3 | solute carrier family 5 member 7                               | 127 | 0.597 | 0.654    | 0.01522  | 0.01 |  | 1 | 1 | 0 | 2015 | 2015 |
| Rheumatoid Ar        | C0003873 | PP CD C  | 60490 | Q96CD2 | phosphopantothienoylcysteine decarboxylase                     | 8   | 0.861 | 0.192    | 0.0004   | 0.01 |  | 1 | 1 | 0 | 2018 | 2018 |

|                                                 |                          |                      |                            |            |                                                                                     |                                                |         |                       |                       |                                  |          |  |   |   |   |                         |
|-------------------------------------------------|--------------------------|----------------------|----------------------------|------------|-------------------------------------------------------------------------------------|------------------------------------------------|---------|-----------------------|-----------------------|----------------------------------|----------|--|---|---|---|-------------------------|
| thr<br>itis                                     |                          |                      |                            |            |                                                                                     |                                                |         |                       | 7<br>9                |                                  |          |  |   |   |   |                         |
| Rh<br>eu<br>ma<br>toi<br>d<br>Ar<br>thr<br>itis | C<br>00<br>03<br>87<br>3 | GA<br>S5             | 6<br>0<br>6<br>7<br>4      |            | growth arrest<br>specific 5                                                         |                                                | 18<br>4 | 0<br>.<br>4<br>9<br>7 | 0<br>.<br>8<br>0<br>8 |                                  | 0.<br>01 |  | 1 | 1 | 0 | 20<br>19<br>0<br>1<br>9 |
| Rh<br>eu<br>ma<br>toi<br>d<br>Ar<br>thr<br>itis | C<br>00<br>03<br>87<br>3 | RO<br>BO<br>1        | 6<br>0<br>9<br>1           | Q9Y6<br>N7 | roundabout<br>guidance<br>receptor 1                                                |                                                | 14<br>4 | 0<br>.<br>5<br>3<br>5 | 0<br>.<br>7<br>3<br>1 | 7.<br>2<br>7<br>E<br>-<br>1<br>6 | 0.<br>01 |  | 1 | 1 | 0 | 20<br>18<br>0<br>1<br>8 |
| Rh<br>eu<br>ma<br>toi<br>d<br>Ar<br>thr<br>itis | C<br>00<br>03<br>87<br>3 | RO<br>RA             | 6<br>0<br>9<br>5           | P3539<br>8 | RAR<br>related<br>orphan<br>receptor<br>A                                           | Nu<br>cle<br>ar<br>rec<br>ept<br>or            | 15<br>8 | 0<br>.<br>5<br>3<br>3 | 0<br>.<br>8<br>0<br>8 | 0.<br>4<br>0<br>0<br>9<br>6      | 0.<br>01 |  | 1 | 1 | 0 | 20<br>19<br>0<br>1<br>9 |
| Rh<br>eu<br>ma<br>toi<br>d<br>Ar<br>thr<br>itis | C<br>00<br>03<br>87<br>3 | BC<br>S1<br>L        | 6<br>1<br>7                | Q9Y2<br>76 | BCS1<br>homolog,<br>ubiquinol-<br>cytochrome c<br>reductase<br>complex<br>chaperone |                                                | 17<br>2 | 0<br>.<br>5<br>3<br>4 | 0<br>.<br>8<br>0<br>8 | 4.<br>7<br>E<br>-<br>1<br>3      | 0.<br>01 |  | 1 | 1 | 0 | 20<br>17<br>0<br>1<br>7 |
| Rh<br>eu<br>ma<br>toi<br>d<br>Ar<br>thr<br>itis | C<br>00<br>03<br>87<br>3 | RP<br>S4<br>X        | 6<br>1<br>9<br>1           | P6270<br>1 | ribosom<br>al<br>protein<br>S4 X-<br>linked                                         | Nu<br>cle<br>ic<br>aci<br>d<br>bin<br>din<br>g | 28      | 0<br>.<br>7<br>1<br>1 | 0<br>.<br>5<br>0<br>8 | 0.<br>9<br>3<br>2<br>2<br>2      | 0.<br>01 |  | 1 | 1 | 0 | 20<br>13<br>0<br>1<br>3 |
| Rh<br>eu<br>ma<br>toi<br>d<br>Ar<br>thr<br>itis | C<br>00<br>03<br>87<br>3 | MI<br>R4<br>86-<br>1 | 6<br>1<br>9<br>5<br>5<br>4 |            | microRNA<br>486-1                                                                   |                                                | 14<br>2 | 0<br>.<br>5<br>2<br>1 | 0<br>.<br>8<br>0<br>8 |                                  | 0.<br>01 |  | 1 | 1 | 0 | 20<br>17<br>0<br>1<br>7 |
| Rh<br>eu<br>ma<br>toi                           | C<br>00<br>03            | RR<br>AS             | 6<br>2<br>3<br>7           | P1030<br>1 | RAS<br>related                                                                      | En<br>zy<br>me<br>mo                           | 14<br>9 | 0<br>.<br>5           | 0<br>.<br>8           | 0.<br>0<br>0<br>4                | 0.<br>01 |  | 1 | 1 | 0 | 20<br>20<br>0<br>2<br>0 |

|                                                 |                          |                 |                  |            |                                                            |                                                            |         |                       |                       |                                  |          |  |   |   |   |          |                  |
|-------------------------------------------------|--------------------------|-----------------|------------------|------------|------------------------------------------------------------|------------------------------------------------------------|---------|-----------------------|-----------------------|----------------------------------|----------|--|---|---|---|----------|------------------|
| d<br>Ar<br>thr<br>itis                          | 87<br>3                  |                 |                  |            |                                                            | dul<br>ato<br>r                                            |         | 4<br>3                | 0<br>8                | 6<br>6<br>3                      |          |  |   |   |   |          |                  |
| Rh<br>eu<br>ma<br>toi<br>d<br>Ar<br>thr<br>itis | C<br>00<br>03<br>87<br>3 | RR<br>M2        | 6<br>2<br>4<br>1 | P3135<br>0 | ribonucleotide<br>reductase<br>regulatory<br>subunit<br>M2 | En<br>zy<br>me                                             | 10<br>1 | 0<br>.<br>5<br>5<br>5 | 0<br>.<br>7<br>6<br>9 | 0.<br>2<br>9<br>6<br>4           | 0.<br>01 |  | 1 | 1 | 0 | 20<br>18 | 2<br>0<br>1<br>8 |
| Rh<br>eu<br>ma<br>toi<br>d<br>Ar<br>thr<br>itis | C<br>00<br>03<br>87<br>3 | RX<br>RA        | 6<br>2<br>5<br>6 | P1979<br>3 | retinoid<br>X<br>receptor<br>alpha                         | Nu<br>cle<br>ar<br>rec<br>ept<br>or                        | 13<br>2 | 0<br>.<br>5<br>4<br>3 | 0<br>.<br>7<br>6<br>9 | 0.<br>9<br>8<br>5<br>2           | 0.<br>01 |  | 1 | 1 | 0 | 20<br>18 | 2<br>0<br>1<br>8 |
| Rh<br>eu<br>ma<br>toi<br>d<br>Ar<br>thr<br>itis | C<br>00<br>03<br>87<br>3 | RY<br>R1        | 6<br>2<br>6<br>1 | P2181<br>7 | ryanodine<br>receptor<br>1                                 | Ion<br>ch<br>an<br>nel                                     | 32<br>0 | 0<br>.<br>4<br>8<br>9 | 0<br>.<br>8<br>0<br>8 | 1.<br>5<br>9<br>E<br>-<br>2<br>9 | 0.<br>01 |  | 0 | 1 | 0 | 19<br>89 | 1<br>9<br>8<br>9 |
| Rh<br>eu<br>ma<br>toi<br>d<br>Ar<br>thr<br>itis | C<br>00<br>03<br>87<br>3 | S10<br>0A<br>10 | 6<br>2<br>8<br>1 | P6090<br>3 | S100<br>calcium<br>binding<br>protein<br>A10               | Ca<br>lci<br>um<br>-<br>bin<br>din<br>g<br>pro<br>tei<br>n | 15<br>0 | 0<br>.<br>5<br>2<br>8 | 0<br>.<br>7<br>6<br>9 | 0.<br>1<br>6<br>8<br>4<br>3      | 0.<br>01 |  | 1 | 1 | 0 | 20<br>18 | 2<br>0<br>1<br>8 |
| Rh<br>eu<br>ma<br>toi<br>d<br>Ar<br>thr<br>itis | C<br>00<br>03<br>87<br>3 | S10<br>0A<br>11 | 6<br>2<br>8<br>2 | P3194<br>9 | S100<br>calcium<br>binding<br>protein<br>A11               | Ca<br>lci<br>um<br>-<br>bin<br>din<br>g<br>pro<br>tei<br>n | 10<br>3 | 0<br>.<br>5<br>5<br>6 | 0<br>.<br>7<br>3<br>1 | 0.<br>0<br>8<br>4<br>6<br>6      | 0.<br>01 |  | 1 | 1 | 0 | 20<br>17 | 2<br>0<br>1<br>7 |
| Rh<br>eu<br>ma<br>toi<br>d<br>Ar                | C<br>00<br>03<br>87<br>3 | SA<br>A4        | 6<br>2<br>9<br>1 | P3554<br>2 | serum<br>amyloid<br>A4,<br>constitutive                    | Tr<br>ans<br>por<br>ter                                    | 13      | 0<br>.<br>7<br>8      | 0<br>.<br>2<br>6<br>9 | 0.<br>0<br>1<br>2<br>3           | 0.<br>01 |  | 1 | 1 | 0 | 20<br>17 | 2<br>0<br>1<br>7 |

|                                                 |                          |           |                  |            |                                               |                                         |         |                       |                       |                                  |          |  |   |   |   |          |                  |
|-------------------------------------------------|--------------------------|-----------|------------------|------------|-----------------------------------------------|-----------------------------------------|---------|-----------------------|-----------------------|----------------------------------|----------|--|---|---|---|----------|------------------|
| thr<br>itis                                     |                          |           |                  |            |                                               |                                         |         |                       |                       | 4<br>6                           |          |  |   |   |   |          |                  |
| Rh<br>eu<br>ma<br>toi<br>d<br>Ar<br>thr<br>itis | C<br>00<br>03<br>87<br>3 | SC<br>D   | 6<br>3<br>1<br>9 | O007<br>67 | stearoyl-CoA<br>desaturase                    |                                         | 22<br>5 | 0<br>.<br>4<br>9      | 0<br>.<br>8<br>0<br>8 | 0.<br>9<br>6<br>9<br>6<br>8      | 0.<br>01 |  | 1 | 1 | 0 | 20<br>19 | 2<br>0<br>1<br>9 |
| Rh<br>eu<br>ma<br>toi<br>d<br>Ar<br>thr<br>itis | C<br>00<br>03<br>87<br>3 | SR<br>L   | 6<br>3<br>4<br>5 | Q86T<br>D4 | sarcalu<br>menin                              | En<br>zy<br>me<br>mo<br>dul<br>ato<br>r | 77      | 0<br>.<br>5<br>9<br>7 | 0<br>.<br>7<br>3<br>1 | 8<br>E<br>-<br>0<br>8            | 0.<br>01 |  | 1 | 1 | 0 | 20<br>04 | 2<br>0<br>0<br>4 |
| Rh<br>eu<br>ma<br>toi<br>d<br>Ar<br>thr<br>itis | C<br>00<br>03<br>87<br>3 | CC<br>L1  | 6<br>3<br>4<br>6 | P2236<br>2 | C-C<br>motif<br>chemoki<br>ne<br>ligand 1     | Sig<br>nal<br>ing                       | 79      | 0<br>.<br>5<br>8<br>7 | 0<br>.<br>6<br>9<br>2 | 0.<br>0<br>7<br>9<br>6<br>7      | 0.<br>01 |  | 1 | 1 | 0 | 20<br>17 | 2<br>0<br>1<br>7 |
| Rh<br>eu<br>ma<br>toi<br>d<br>Ar<br>thr<br>itis | C<br>00<br>03<br>87<br>3 | CC<br>L11 | 6<br>3<br>5<br>6 | P5167<br>1 | C-C<br>motif<br>chemoki<br>ne<br>ligand<br>11 | Sig<br>nal<br>ing                       | 25<br>0 | 0<br>.<br>4<br>7<br>3 | 0<br>.<br>8<br>8<br>5 | 0.<br>0<br>1<br>0<br>2<br>1<br>1 | 0.<br>01 |  | 1 | 1 | 0 | 20<br>17 | 2<br>0<br>1<br>7 |
| Rh<br>eu<br>ma<br>toi<br>d<br>Ar<br>thr<br>itis | C<br>00<br>03<br>87<br>3 | CC<br>L14 | 6<br>3<br>5<br>8 | Q166<br>27 | C-C<br>motif<br>chemoki<br>ne<br>ligand<br>14 | Sig<br>nal<br>ing                       | 29      | 0<br>.<br>6<br>9<br>5 | 0<br>.<br>4<br>2<br>3 | 0.<br>0<br>0<br>0<br>1<br>0<br>9 | 0.<br>01 |  | 1 | 1 | 0 | 20<br>17 | 2<br>0<br>1<br>7 |
| Rh<br>eu<br>ma<br>toi<br>d<br>Ar<br>thr<br>itis | C<br>00<br>03<br>87<br>3 | CC<br>L23 | 6<br>3<br>6<br>8 | P5577<br>3 | C-C<br>motif<br>chemoki<br>ne<br>ligand<br>23 | Sig<br>nal<br>ing                       | 18      | 0<br>.<br>7<br>6      | 0<br>.<br>3<br>4<br>6 | 0.<br>0<br>0<br>0<br>5<br>9<br>7 | 0.<br>01 |  | 1 | 1 | 0 | 20<br>08 | 2<br>0<br>0<br>8 |
| Rh<br>eu<br>ma<br>toi                           | C<br>00<br>03            | CC<br>L24 | 6<br>3<br>6<br>9 | O001<br>75 | C-C<br>motif<br>chemoki<br>ne                 | Sig<br>nal<br>ing                       | 67      | 0<br>.<br>6           | 0<br>.<br>7           | 0.<br>0<br>0<br>7                | 0.<br>01 |  | 1 | 1 | 0 | 20<br>05 | 2<br>0<br>0<br>5 |

|                                                 |                          |                |                       |            |                                                                      |                                                    |         |                       |                       |                                  |          |  |   |   |   |          |                  |
|-------------------------------------------------|--------------------------|----------------|-----------------------|------------|----------------------------------------------------------------------|----------------------------------------------------|---------|-----------------------|-----------------------|----------------------------------|----------|--|---|---|---|----------|------------------|
| d<br>Ar<br>thr<br>itis                          | 87<br>3                  |                |                       |            | ligand<br>24                                                         |                                                    |         | 0<br>8                | 3<br>1                | 0<br>8<br>9                      |          |  |   |   |   |          |                  |
| Rh<br>eu<br>ma<br>toi<br>d<br>Ar<br>thr<br>itis | C<br>00<br>03<br>87<br>3 | XC<br>L1       | 6<br>3<br>7<br>5      | P4799<br>2 | X-C<br>motif<br>chemoki<br>ne<br>ligand 1                            | Sig<br>nal<br>ing                                  | 67      | 0<br>.<br>6<br>0<br>1 | 0<br>.<br>6<br>9<br>2 | 0.<br>0<br>1<br>2<br>2<br>9<br>8 | 0.<br>01 |  | 1 | 1 | 0 | 20<br>03 | 2<br>0<br>0<br>3 |
| Rh<br>eu<br>ma<br>toi<br>d<br>Ar<br>thr<br>itis | C<br>00<br>03<br>87<br>3 | SD<br>C4       | 6<br>3<br>8<br>5      | P3143<br>1 | syndeca<br>n 4                                                       | Ex<br>tra<br>cel<br>lul<br>ar<br>str<br>uct<br>ure | 71      | 0<br>.<br>6<br>0<br>3 | 0<br>.<br>6<br>1<br>5 | 0.<br>0<br>0<br>4<br>1<br>4<br>8 | 0.<br>01 |  | 1 | 1 | 0 | 20<br>20 | 2<br>0<br>2<br>0 |
| Rh<br>eu<br>ma<br>toi<br>d<br>Ar<br>thr<br>itis | C<br>00<br>03<br>87<br>3 | MR<br>PL<br>17 | 6<br>3<br>8<br>7<br>5 | Q9NR<br>X2 | mitocho<br>ndrial<br>ribosom<br>al<br>protein<br>L17                 | Nu<br>cle<br>ic<br>aci<br>d<br>bin<br>din<br>g     | 4       | 0<br>.<br>8<br>6<br>1 | 0<br>.<br>1<br>9<br>2 | 0.<br>0<br>2<br>8<br>1<br>9<br>8 | 0.<br>01 |  | 1 | 1 | 0 | 20<br>08 | 2<br>0<br>0<br>8 |
| Rh<br>eu<br>ma<br>toi<br>d<br>Ar<br>thr<br>itis | C<br>00<br>03<br>87<br>3 | ER<br>VK<br>-6 | 6<br>4<br>0<br>0<br>6 |            | endogenous<br>retrovirus<br>group K<br>member 6,<br>envelope         |                                                    | 16<br>2 | 0<br>.<br>5<br>2<br>1 | 0<br>.<br>8<br>0<br>8 |                                  | 0.<br>01 |  | 1 | 1 | 0 | 20<br>17 | 2<br>0<br>1<br>7 |
| Rh<br>eu<br>ma<br>toi<br>d<br>Ar<br>thr<br>itis | C<br>00<br>03<br>87<br>3 | ER<br>AP<br>2  | 6<br>4<br>1<br>6<br>7 | Q6P1<br>79 | endoplas<br>mic<br>reticulu<br>m<br>aminope<br>ptidase 2             | En<br>zy<br>me                                     | 58      | 0<br>.<br>6<br>1<br>5 | 0<br>.<br>5<br>7<br>7 | 1<br>E<br>-<br>2<br>8            | 0.<br>01 |  | 1 | 1 | 0 | 20<br>16 | 2<br>0<br>1<br>6 |
| Rh<br>eu<br>ma<br>toi<br>d<br>Ar<br>thr<br>itis | C<br>00<br>03<br>87<br>3 | SE<br>TM<br>AR | 6<br>4<br>1<br>9      | Q53H<br>47 | SET<br>domain<br>and<br>mariner<br>transpos<br>ase<br>fusion<br>gene | Ep<br>ige<br>net<br>ic<br>reg<br>ula<br>tor        | 61      | 0<br>.<br>6<br>1<br>7 | 0<br>.<br>6<br>9<br>2 | 0.<br>0<br>0<br>1<br>0<br>2      | 0.<br>01 |  | 1 | 1 | 0 | 20<br>18 | 2<br>0<br>1<br>8 |

|                      |          |       |       |        |                                                     |                 |     |       |          |          |      |  |   |   |   |      |      |
|----------------------|----------|-------|-------|--------|-----------------------------------------------------|-----------------|-----|-------|----------|----------|------|--|---|---|---|------|------|
| Rheumatoid Arthritis | C0003873 | STRA6 | 64220 | Q9BX79 | signaling receptor and transporter of retinol STRA6 |                 | 100 | 0.597 | 0.71     | 1.51E-10 | 0.01 |  | 1 | 1 | 0 | 2013 | 2013 |
| Rheumatoid Arthritis | C0003873 | ROBO3 | 64221 | Q96MS0 | roundabout guidance receptor 3                      | Receptor        | 154 | 0.52  | 0.88     | 2E-15    | 0.01 |  | 1 | 1 | 0 | 2010 | 2010 |
| Rheumatoid Arthritis | C0003873 | SFRP2 | 6423  | Q96HF1 | secreted frizzled related protein 2                 |                 | 134 | 0.544 | 0.731    | 0.00669  | 0.01 |  | 1 | 1 | 0 | 2003 | 2003 |
| Rheumatoid Arthritis | C0003873 | SFRP4 | 6424  | Q6FJ7  | secreted frizzled related protein 4                 |                 | 155 | 0.524 | 0.654    | 9.26E-05 | 0.01 |  | 1 | 1 | 0 | 2014 | 2014 |
| Rheumatoid Arthritis | C0003873 | SFRP5 | 6425  | Q5T4F7 | secreted frizzled related protein 5                 |                 | 106 | 0.599 | 0.692    | 5.18E-06 | 0.01 |  | 1 | 1 | 0 | 2014 | 2014 |
| Rheumatoid Arthritis | C0003873 | MP25  | 64386 | Q9NPA2 | matrix metalloproteinase 25                         | Enzyme          | 37  | 0.678 | 0.53E-14 | 8.73E-14 | 0.01 |  | 1 | 1 | 0 | 1999 | 1999 |
| Rheumatoid Ar        | C0003873 | SGCA  | 6442  | Q16586 | sarcoglycan alpha                                   | Calcium-binding | 111 | 0.592 | 0.654    | 0.0027   | 0.01 |  | 0 | 1 | 0 | 2019 | 2019 |



|                                                 |                          |                     |                       |            |                                                               |                                         |         |                       |                       |                                  |          |  |   |   |   |          |                  |
|-------------------------------------------------|--------------------------|---------------------|-----------------------|------------|---------------------------------------------------------------|-----------------------------------------|---------|-----------------------|-----------------------|----------------------------------|----------|--|---|---|---|----------|------------------|
| thr<br>itis                                     |                          |                     |                       |            |                                                               | g<br>pro<br>tei<br>n                    |         |                       |                       | 1<br>2                           |          |  |   |   |   |          |                  |
| Rh<br>eu<br>ma<br>toi<br>d<br>Ar<br>thr<br>itis | C<br>00<br>03<br>87<br>3 | DC<br>LR<br>E1<br>C | 6<br>4<br>4<br>2<br>1 | Q96S<br>D1 | DNA cross-<br>link repair 1C                                  |                                         | 15<br>0 | 0<br>.<br>5<br>4<br>4 | 0<br>.<br>8<br>0<br>8 | 2.<br>4<br>9<br>E<br>-<br>0<br>7 | 0.<br>01 |  | 1 | 1 | 0 | 20<br>11 | 2<br>0<br>1<br>1 |
| Rh<br>eu<br>ma<br>toi<br>d<br>Ar<br>thr<br>itis | C<br>00<br>03<br>87<br>3 | CI<br>AO<br>3       | 6<br>4<br>4<br>2<br>8 | Q9H6<br>Q4 | cytosoli<br>c iron-<br>sulfur<br>assembl<br>y compon<br>ent 3 | En<br>zy<br>me                          | 30      | 0<br>.<br>7           | 0<br>.<br>4<br>6<br>2 | 1.<br>8<br>9<br>E<br>-<br>0<br>9 | 0.<br>01 |  | 1 | 1 | 0 | 20<br>19 | 2<br>0<br>1<br>9 |
| Rh<br>eu<br>ma<br>toi<br>d<br>Ar<br>thr<br>itis | C<br>00<br>03<br>87<br>3 | SG<br>CG            | 6<br>4<br>4<br>5      | Q133<br>26 | sarcogly<br>can<br>gamma                                      | Ce<br>llul<br>ar<br>str<br>uct<br>ure   | 93      | 0<br>.<br>6<br>2<br>1 | 0<br>.<br>6<br>1<br>5 | 4.<br>8<br>2<br>E<br>-<br>0<br>5 | 0.<br>01 |  | 1 | 1 | 0 | 20<br>17 | 2<br>0<br>1<br>7 |
| Rh<br>eu<br>ma<br>toi<br>d<br>Ar<br>thr<br>itis | C<br>00<br>03<br>87<br>3 | SH<br>3B<br>P2      | 6<br>4<br>5<br>2      | P7831<br>4 | SH3 domain<br>binding<br>protein 2                            |                                         | 65      | 0<br>.<br>6<br>2<br>3 | 0<br>.<br>6<br>5<br>4 | 1.<br>1<br>6<br>E<br>-<br>1<br>1 | 0.<br>01 |  | 1 | 1 | 0 | 20<br>15 | 2<br>0<br>1<br>5 |
| Rh<br>eu<br>ma<br>toi<br>d<br>Ar<br>thr<br>itis | C<br>00<br>03<br>87<br>3 | ITS<br>N1           | 6<br>4<br>5<br>3      | Q158<br>11 | intersect<br>in 1                                             | En<br>zy<br>me<br>mo<br>dul<br>ato<br>r | 51      | 0<br>.<br>6<br>5<br>6 | 0<br>.<br>5<br>7<br>7 | 1                                | 0.<br>01 |  | 1 | 1 | 0 | 20<br>19 | 2<br>0<br>1<br>9 |
| Rh<br>eu<br>ma<br>toi<br>d<br>Ar<br>thr<br>itis | C<br>00<br>03<br>87<br>3 | SH<br>H             | 6<br>4<br>6<br>9      | Q154<br>65 | sonic<br>hedgehog<br>signaling<br>molecule                    |                                         | 30<br>3 | 0<br>.<br>4<br>6<br>1 | 0<br>.<br>8<br>4<br>6 | 0.<br>9<br>8<br>2<br>5<br>8      | 0.<br>01 |  | 1 | 1 | 0 | 20<br>19 | 2<br>0<br>1<br>9 |

|                      |          |           |        |         |                                                           |                            |     |       |       |          |      |  |   |   |   |      |      |
|----------------------|----------|-----------|--------|---------|-----------------------------------------------------------|----------------------------|-----|-------|-------|----------|------|--|---|---|---|------|------|
| Rheumatoid Arthritis | C0003873 | ENGA SE   | 64772  | Q8NF I3 | endo-beta-N-acetylglucosaminidase                         | Enzyme                     | 4   | 0.861 | 0.231 | 4.41E-25 | 0.01 |  | 1 | 1 | 0 | 2003 | 2003 |
| Rheumatoid Arthritis | C0003873 | P2RY12    | 64805  | Q9H244  | purinergic receptor P2Y12                                 | G-protein coupled receptor | 153 | 0.533 | 0.731 | 0.001686 | 0.01 |  | 1 | 1 | 0 | 2019 | 2019 |
| Rheumatoid Arthritis | C0003873 | IL25      | 64806  | Q9H293  | interleukin 25                                            |                            | 139 | 0.529 | 0.846 | 0.000923 | 0.01 |  | 1 | 1 | 0 | 2017 | 2017 |
| Rheumatoid Arthritis | C0003873 | CDCP1     | 64866  | Q9H5V8  | CUB domain containing protein 1                           |                            | 81  | 0.604 | 0.654 | 0.0001   | 0.01 |  | 1 | 1 | 0 | 2017 | 2017 |
| Rheumatoid Arthritis | C0003873 | LINC00273 | 649159 |         | long intergenic non-protein coding RNA 273                |                            | 82  | 0.585 | 0.846 |          | 0.01 |  | 1 | 1 | 0 | 2017 | 2017 |
| Rheumatoid Arthritis | C0003873 | SLAMF1    | 6504   | Q13291  | signaling lymphocytic activation molecule family member 1 |                            | 70  | 0.612 | 0.650 | 0.00037  | 0.01 |  | 1 | 1 | 0 | 1999 | 1999 |
| Rheumatoid           | C0003    | SLC2A1    | 6513   | P11166  | solute carrier family 2                                   | Transporter                | 687 | 0.3   | 0.8   | 0.099    | 0.01 |  | 1 | 1 | 0 | 2019 | 2019 |

|                                                 |                          |                     |                            |                       |                                              |                         |         |                       |                       |                                  |          |  |   |   |   |          |                  |
|-------------------------------------------------|--------------------------|---------------------|----------------------------|-----------------------|----------------------------------------------|-------------------------|---------|-----------------------|-----------------------|----------------------------------|----------|--|---|---|---|----------|------------------|
| d<br>Ar<br>thr<br>itis                          | 87<br>3                  |                     |                            |                       | member<br>1                                  |                         |         | 8<br>8                | 0<br>8                | 4<br>1                           |          |  |   |   |   |          |                  |
| Rh<br>eu<br>ma<br>toi<br>d<br>Ar<br>thr<br>itis | C<br>00<br>03<br>87<br>3 | SL<br>C3<br>A2      | 6<br>5<br>2<br>0           | P0819<br>5            | solute<br>carrier<br>family 3<br>member<br>2 | Tr<br>ans<br>por<br>ter | 10<br>8 | 0<br>.<br>5<br>6<br>5 | 0<br>.<br>7<br>3<br>1 | 4.<br>2<br>2<br>E<br>-<br>0<br>8 | 0.<br>01 |  | 1 | 1 | 0 | 20<br>18 | 2<br>0<br>1<br>8 |
| Rh<br>eu<br>ma<br>toi<br>d<br>Ar<br>thr<br>itis | C<br>00<br>03<br>87<br>3 | SL<br>C5<br>A5      | 6<br>5<br>2<br>8           | Q929<br>11            | solute<br>carrier<br>family 5<br>member<br>5 | Tr<br>ans<br>por<br>ter | 19<br>5 | 0<br>.<br>4<br>9<br>9 | 0<br>.<br>7<br>6<br>9 | 0.<br>0<br>0<br>2<br>9<br>4<br>9 | 0.<br>01 |  | 1 | 1 | 0 | 20<br>05 | 2<br>0<br>0<br>5 |
| Rh<br>eu<br>ma<br>toi<br>d<br>Ar<br>thr<br>itis | C<br>00<br>03<br>87<br>3 | UC<br>A1            | 6<br>5<br>2<br>9<br>9<br>5 |                       | urothelial<br>cancer<br>associated 1         |                         | 15<br>2 | 0<br>.<br>5<br>1<br>2 | 0<br>.<br>8<br>0<br>8 |                                  | 0.<br>01 |  | 1 | 1 | 0 | 20<br>18 | 2<br>0<br>1<br>8 |
| Rh<br>eu<br>ma<br>toi<br>d<br>Ar<br>thr<br>itis | C<br>00<br>03<br>87<br>3 | BM<br>P5            | 6<br>5<br>3                | P2200<br>3            | bone<br>morpho<br>genetic<br>protein 5       | Sig<br>nal<br>ing       | 43      | 0<br>.<br>6<br>5<br>3 | 0<br>.<br>5<br>7<br>7 | 0.<br>0<br>0<br>0<br>9<br>0<br>1 | 0.<br>01 |  | 1 | 1 | 0 | 20<br>06 | 2<br>0<br>0<br>6 |
| Rh<br>eu<br>ma<br>toi<br>d<br>Ar<br>thr<br>itis | C<br>00<br>03<br>87<br>3 | SP<br>AG<br>11<br>A | 6<br>5<br>3<br>4<br>2<br>3 | Q086<br>48;Q6<br>PDA7 | sperm<br>associated<br>antigen 11A           |                         | 44      | 0<br>.<br>6<br>5      | 0<br>.<br>7<br>3<br>1 | 6.<br>9<br>6<br>E<br>-<br>0<br>5 | 0.<br>01 |  | 1 | 1 | 0 | 20<br>09 | 2<br>0<br>0<br>9 |
| Rh<br>eu<br>ma<br>toi<br>d<br>Ar<br>thr<br>itis | C<br>00<br>03<br>87<br>3 | SL<br>C7<br>A4      | 6<br>5<br>4<br>5           | O432<br>46            | solute<br>carrier<br>family 7<br>member<br>4 | Tr<br>ans<br>por<br>ter | 31      | 0<br>.<br>6<br>6<br>6 | 0<br>.<br>4<br>2<br>3 | 2.<br>8<br>3<br>E<br>-<br>0<br>7 | 0.<br>01 |  | 1 | 1 | 0 | 19<br>97 | 1<br>9<br>9<br>7 |

|                      |          |         |      |        |                                          |                 |     |       |       |          |      |  |   |   |   |      |      |
|----------------------|----------|---------|------|--------|------------------------------------------|-----------------|-----|-------|-------|----------|------|--|---|---|---|------|------|
| Rheumatoid Arthritis | C0003873 | SLC8A3  | 6547 | P57103 | solute carrier family 8 member A3        | Transporter     | 51  | 0.66  | 0.46  | 0.0734   | 0.01 |  | 1 | 1 | 0 | 2016 | 2016 |
| Rheumatoid Arthritis | C0003873 | SLC22A2 | 6582 | O15244 | solute carrier family 22 member 2        | Transporter     | 98  | 0.572 | 0.769 | 2.02E-12 | 0.01 |  | 1 | 1 | 0 | 2019 | 2019 |
| Rheumatoid Arthritis | C0003873 | SLIT3   | 6586 | O75094 | slit guidance ligand 3                   |                 | 62  | 0.623 | 0.615 | 0.7233   | 0.01 |  | 1 | 1 | 0 | 2010 | 2010 |
| Rheumatoid Arthritis | C0003873 | SNAI2   | 6591 | O43623 | snail family transcriptional repressor 2 |                 | 189 | 0.505 | 0.692 | 0.731    | 0.01 |  | 1 | 1 | 0 | 2010 | 2010 |
| Rheumatoid Arthritis | C0003873 | BMX     | 660  | P51813 | BMX non-receptor tyrosine kinase         | Kinase          | 38  | 0.633 | 0.856 | 0.0673   | 0.01 |  | 1 | 1 | 0 | 2008 | 2008 |
| Rheumatoid Arthritis | C0003873 | CHID1   | 6605 | Q9BWS9 | chitinase domain containing 1            |                 | 5   | 0.861 | 0.912 | 1.38E-05 | 0.01 |  | 1 | 1 | 0 | 2014 | 2014 |
| Rheumatoid Ar        | C0003873 | SMO     | 6608 | Q99835 | smoothened, frizzled class receptor      | G-protein coupl | 215 | 0.489 | 0.731 | 4.28E-1  | 0.01 |  | 1 | 1 | 0 | 2017 | 2017 |

|                                                 |                          |                 |                            |            |                                                  |                                             |         |                       |                       |                                  |          |  |   |   |   |          |                  |
|-------------------------------------------------|--------------------------|-----------------|----------------------------|------------|--------------------------------------------------|---------------------------------------------|---------|-----------------------|-----------------------|----------------------------------|----------|--|---|---|---|----------|------------------|
| thr<br>itis                                     |                          |                 |                            |            |                                                  | ed<br>rec<br>ept<br>or                      |         |                       |                       | 0<br>7                           |          |  |   |   |   |          |                  |
| Rh<br>eu<br>ma<br>toi<br>d<br>Ar<br>thr<br>itis | C<br>00<br>03<br>87<br>3 | SM<br>PD<br>1   | 6<br>6<br>0<br>9           | P1740<br>5 | sphingo<br>myelin<br>phospho<br>diesteras<br>e 1 | En<br>zy<br>me                              | 24<br>7 | 0<br>.<br>4<br>9<br>9 | 0<br>.<br>8<br>8<br>5 | 3.<br>8<br>9<br>E<br>-<br>1<br>0 | 0.<br>01 |  | 1 | 1 | 0 | 20<br>17 | 2<br>0<br>1<br>7 |
| Rh<br>eu<br>ma<br>toi<br>d<br>Ar<br>thr<br>itis | C<br>00<br>03<br>87<br>3 | SIG<br>LE<br>C1 | 6<br>6<br>1<br>4           | Q9BZ<br>Z2 | sialic acid<br>binding Ig like<br>lectin 1       |                                             | 75      | 0<br>.<br>5<br>9<br>7 | 0<br>.<br>6<br>5<br>4 | 5.<br>3<br>3<br>E<br>-<br>4<br>6 | 0.<br>01 |  | 1 | 1 | 0 | 20<br>13 | 2<br>0<br>1<br>3 |
| Rh<br>eu<br>ma<br>toi<br>d<br>Ar<br>thr<br>itis | C<br>00<br>03<br>87<br>3 | SN<br>AI1       | 6<br>6<br>1<br>5           | O958<br>63 | snail family<br>transcriptional<br>repressor 1   |                                             | 24<br>3 | 0<br>.<br>4<br>7<br>4 | 0<br>.<br>8<br>0<br>8 | 0.<br>2<br>1<br>7<br>5<br>4      | 0.<br>01 |  | 1 | 1 | 0 | 20<br>19 | 2<br>0<br>1<br>9 |
| Rh<br>eu<br>ma<br>toi<br>d<br>Ar<br>thr<br>itis | C<br>00<br>03<br>87<br>3 | MI<br>R5<br>39  | 6<br>6<br>4<br>6<br>1<br>2 |            | microRNA<br>539                                  |                                             | 62      | 0<br>.<br>6<br>1      | 0<br>.<br>6<br>5<br>4 |                                  | 0.<br>01 |  | 1 | 1 | 0 | 20<br>18 | 2<br>0<br>1<br>8 |
| Rh<br>eu<br>ma<br>toi<br>d<br>Ar<br>thr<br>itis | C<br>00<br>03<br>87<br>3 | SO<br>X4        | 6<br>6<br>5<br>9           | Q069<br>45 | SRV-<br>box<br>transcrip<br>tion<br>factor 4     | Tr<br>ans<br>cri<br>pti<br>on<br>fac<br>tor | 24<br>6 | 0<br>.<br>4<br>8<br>9 | 0<br>.<br>8<br>0<br>8 | 0.<br>9<br>2<br>6<br>5<br>6      | 0.<br>01 |  | 1 | 1 | 0 | 20<br>18 | 2<br>0<br>1<br>8 |
| Rh<br>eu<br>ma<br>toi<br>d<br>Ar<br>thr<br>itis | C<br>00<br>03<br>87<br>3 | DS<br>T         | 6<br>6<br>7                | Q030<br>01 | dystonin                                         | Ce<br>llul<br>ar<br>str<br>uct<br>ure       | 14<br>7 | 0<br>.<br>5<br>5<br>2 | 0<br>.<br>8<br>4<br>6 | 1                                | 0.<br>01 |  | 1 | 1 | 0 | 20<br>09 | 2<br>0<br>0<br>9 |
| Rh<br>eu                                        | C<br>00                  | SP<br>R         | 6<br>6                     | P3527<br>0 | sepiapterin<br>reductase                         |                                             | 90      | 0<br>.                | 0<br>.                | 0.<br>0                          | 0.<br>01 |  | 1 | 1 | 0 | 20<br>20 | 2<br>0           |

|                                                 |                          |                |                  |            |                                                                       |                                                |         |                       |                       |                                  |          |  |   |   |   |          |                  |
|-------------------------------------------------|--------------------------|----------------|------------------|------------|-----------------------------------------------------------------------|------------------------------------------------|---------|-----------------------|-----------------------|----------------------------------|----------|--|---|---|---|----------|------------------|
| ma<br>toi<br>d<br>Ar<br>thr<br>itis             | 03<br>87<br>3            |                | 9<br>7           |            |                                                                       |                                                |         | 6<br>3<br>1           | 6<br>5<br>4           | 4<br>3<br>4                      |          |  |   |   |   |          | 2<br>0           |
| Rh<br>eu<br>ma<br>toi<br>d<br>Ar<br>thr<br>itis | C<br>00<br>03<br>87<br>3 | BPI            | 6<br>7<br>1      | P1721<br>3 | bactericidal<br>permeability<br>increasing<br>protein                 |                                                | 83      | 0<br>.<br>6<br>1      | 0<br>.<br>7<br>6<br>9 | 1.<br>6<br>5<br>E<br>-<br>1<br>4 | 0.<br>01 |  | 1 | 1 | 0 | 20<br>03 | 2<br>0<br>0<br>3 |
| Rh<br>eu<br>ma<br>toi<br>d<br>Ar<br>thr<br>itis | C<br>00<br>03<br>87<br>3 | SR<br>C        | 6<br>7<br>1<br>4 | P1293<br>1 | SRC<br>proto-<br>oncogen<br>e, non-<br>receptor<br>tyrosine<br>kinase | Ki<br>nas<br>e                                 | 26<br>5 | 0<br>.<br>4<br>6<br>7 | 0<br>.<br>8<br>8<br>5 | 0.<br>9<br>9<br>6<br>9<br>1      | 0.<br>01 |  | 1 | 1 | 0 | 20<br>16 | 2<br>0<br>1<br>6 |
| Rh<br>eu<br>ma<br>toi<br>d<br>Ar<br>thr<br>itis | C<br>00<br>03<br>87<br>3 | AK<br>R1<br>D1 | 6<br>7<br>1<br>8 | P5185<br>7 | aldo-<br>keto<br>reductas<br>e family<br>1<br>member<br>D1            | En<br>zy<br>me                                 | 40      | 0<br>.<br>7<br>1<br>1 | 0<br>.<br>3<br>8<br>5 | 1.<br>7<br>2<br>E<br>-<br>0<br>7 | 0.<br>01 |  | 1 | 1 | 0 | 20<br>17 | 2<br>0<br>1<br>7 |
| Rh<br>eu<br>ma<br>toi<br>d<br>Ar<br>thr<br>itis | C<br>00<br>03<br>87<br>3 | SR<br>F        | 6<br>7<br>2<br>2 | P1183<br>1 | serum<br>response<br>factor                                           | Tr<br>ans<br>cri<br>pti<br>on<br>fac<br>tor    | 14<br>7 | 0<br>.<br>5<br>3<br>4 | 0<br>.<br>8<br>0<br>8 | 0.<br>9<br>7<br>5<br>4<br>5      | 0.<br>01 |  | 1 | 1 | 0 | 19<br>99 | 1<br>9<br>9<br>9 |
| Rh<br>eu<br>ma<br>toi<br>d<br>Ar<br>thr<br>itis | C<br>00<br>03<br>87<br>3 | SR<br>P54      | 6<br>7<br>2<br>9 | P6101<br>1 | signal<br>recogniti<br>on<br>particle<br>54                           | Nu<br>cle<br>ic<br>aci<br>d<br>bin<br>din<br>g | 96      | 0<br>.<br>6<br>1<br>2 | 0<br>.<br>7<br>6<br>9 | 0.<br>9<br>9<br>8<br>9<br>5      | 0.<br>01 |  | 1 | 1 | 0 | 20<br>18 | 2<br>0<br>1<br>8 |
| Rh<br>eu<br>ma<br>toi<br>d<br>Ar<br>thr<br>itis | C<br>00<br>03<br>87<br>3 | SR<br>Y        | 6<br>7<br>3<br>6 | Q050<br>66 | sex<br>determin<br>ing<br>region Y                                    | Tr<br>ans<br>cri<br>pti<br>on<br>fac<br>tor    | 31<br>5 | 0<br>.<br>4<br>5<br>6 | 0<br>.<br>8<br>0<br>8 |                                  | 0.<br>01 |  | 1 | 1 | 0 | 20<br>08 | 2<br>0<br>0<br>8 |

|                      |          |       |      |        |                                                    |                      |     |       |       |          |      |  |   |   |   |      |      |
|----------------------|----------|-------|------|--------|----------------------------------------------------|----------------------|-----|-------|-------|----------|------|--|---|---|---|------|------|
| Rheumatoid Arthritis | C0003873 | RO60  | 6738 | P10155 | Ro60, Y RNA binding protein                        | Nucleic acid binding | 61  | 0.61  | 0.692 | 0.58278  | 0.01 |  | 1 | 1 | 0 | 2018 | 2018 |
| Rheumatoid Arthritis | C0003873 | SSB   | 6741 | P05455 | small RNA binding exonuclease protection factor La | Nucleic acid binding | 60  | 0.612 | 0.692 | 0.899615 | 0.01 |  | 1 | 1 | 0 | 2013 | 2013 |
| Rheumatoid Arthritis | C0003873 | ST2   | 6761 |        | suppression of tumorigenicity 2                    |                      | 96  | 0.576 | 0.692 |          | 0.01 |  | 1 | 1 | 0 | 2018 | 2018 |
| Rheumatoid Arthritis | C0003873 | STATH | 6779 | P02808 | statherin                                          |                      | 57  | 0.608 | 0.769 | 7.8E-05  | 0.01 |  | 1 | 1 | 0 | 2002 | 2002 |
| Rheumatoid Arthritis | C0003873 | STIM1 | 6786 | Q13586 | stromal interaction molecule 1                     |                      | 247 | 0.501 | 0.808 | 0.7534   | 0.01 |  | 1 | 1 | 0 | 2019 | 2019 |
| Rheumatoid Arthritis | C0003873 | AURKA | 6790 | O14965 | aurora kinase A                                    | Kinase               | 245 | 0.475 | 0.731 | 0.8676   | 0.01 |  | 1 | 1 | 0 | 2006 | 2006 |
| Rheumatoid Ar        | C0003873 | TACR2 | 6865 | P21452 | tachykinin receptor 2                              | G-protein coupl      | 33  | 0.7   | 0.5   | 8.3E-    | 0.01 |  | 1 | 1 | 0 | 2005 | 2005 |

|                      |          |       |      |        |                                                                   |                            |     |       |         |          |      |  |   |   |   |      |      |
|----------------------|----------|-------|------|--------|-------------------------------------------------------------------|----------------------------|-----|-------|---------|----------|------|--|---|---|---|------|------|
| thritis              |          |       |      |        |                                                                   | ed<br>rec<br>ept<br>or     |     |       |         | 0<br>5   |      |  |   |   |   |      |      |
| Rheumatoid Arthritis | C0003873 | TACR3 | 6870 | P29371 | tachykinin receptor 3                                             | G-protein coupled receptor | 147 | 0.553 | 0.769   | 1.81E-17 | 0.01 |  | 1 | 1 | 0 | 2005 | 2005 |
| Rheumatoid Arthritis | C0003873 | TAGLN | 6876 | Q01995 | transgelin                                                        | Cellular structure         | 131 | 0.54  | 0.692   | 0.08527  | 0.01 |  | 1 | 1 | 0 | 2019 | 2019 |
| Rheumatoid Arthritis | C0003873 | TAL1  | 6886 | P17542 | TAL bHLH transcription factor 1, erythroid differentiation factor | Transcription factor       | 202 | 0.505 | 0.7359  | 0.569    | 0.01 |  | 1 | 1 | 0 | 2004 | 2004 |
| Rheumatoid Arthritis | C0003873 | TAT   | 6898 | P17735 | tyrosine aminotransferase                                         |                            | 230 | 0.492 | 0.8469  | 0.0069   | 0.01 |  | 1 | 1 | 0 | 2006 | 2006 |
| Rheumatoid Arthritis | C0003873 | TBX1  | 6899 | O43435 | T-box transcription factor 1                                      | Transcription factor       | 417 | 0.433 | 0.80861 | 0.8361   | 0.01 |  | 1 | 1 | 0 | 2018 | 2018 |
| Rheumatoid Ar        | C0003873 | TCEA1 | 6917 | P23193 | transcription elongation factor A1                                | Nucleic acid bin           | 34  | 0.695 | 0.615   | 0.89541  | 0.01 |  | 1 | 1 | 0 | 2017 | 2017 |



|                                                 |                          |                                 |                            |            |                                        |                                             |         |                       |                       |                                  |          |  |   |   |   |          |                  |
|-------------------------------------------------|--------------------------|---------------------------------|----------------------------|------------|----------------------------------------|---------------------------------------------|---------|-----------------------|-----------------------|----------------------------------|----------|--|---|---|---|----------|------------------|
| thr<br>itis                                     |                          |                                 |                            |            |                                        | din<br>g                                    |         |                       |                       |                                  |          |  |   |   |   |          |                  |
| Rh<br>eu<br>ma<br>toi<br>d<br>Ar<br>thr<br>itis | C<br>00<br>03<br>87<br>3 | PP<br>AN<br>-<br>P2<br>RY<br>11 | 6<br>9<br>2<br>3<br>1<br>2 | Q9N<br>Q55 | PPAN-<br>P2RY11<br>readthrough         |                                             | 17      | 0<br>.<br>7<br>3<br>6 | 0<br>.<br>5<br>7<br>7 | 1.<br>7<br>2<br>E<br>-<br>1<br>2 | 0.<br>01 |  | 1 | 1 | 0 | 20<br>19 | 2<br>0<br>1<br>9 |
| Rh<br>eu<br>ma<br>toi<br>d<br>Ar<br>thr<br>itis | C<br>00<br>03<br>87<br>3 | TB<br>X3                        | 6<br>9<br>2<br>6           | O151<br>19 | T-box<br>transcrip<br>tion<br>factor 3 | Tr<br>ans<br>cri<br>pti<br>on<br>fac<br>tor | 17<br>9 | 0<br>.<br>5<br>2<br>5 | 0<br>.<br>7<br>6<br>9 | 0.<br>9<br>8<br>9<br>0<br>7      | 0.<br>01 |  | 1 | 1 | 0 | 20<br>19 | 2<br>0<br>1<br>9 |
| Rh<br>eu<br>ma<br>toi<br>d<br>Ar<br>thr<br>itis | C<br>00<br>03<br>87<br>3 | TC<br>F3                        | 6<br>9<br>2<br>9           | P1592<br>3 | transcrip<br>tion<br>factor 3          | Tr<br>ans<br>cri<br>pti<br>on<br>fac<br>tor | 24<br>4 | 0<br>.<br>4<br>7<br>6 | 0<br>.<br>8<br>4<br>6 | 0.<br>0<br>2<br>5<br>8<br>2<br>4 | 0.<br>01 |  | 1 | 1 | 0 | 19<br>92 | 1<br>9<br>9<br>2 |
| Rh<br>eu<br>ma<br>toi<br>d<br>Ar<br>thr<br>itis | C<br>00<br>03<br>87<br>3 | MI<br>R4<br>21                  | 6<br>9<br>3<br>1<br>2<br>2 |            | microRNA<br>421                        |                                             | 73      | 0<br>.<br>5<br>9<br>2 | 0<br>.<br>6<br>9<br>2 |                                  | 0.<br>01 |  | 1 | 1 | 0 | 20<br>19 | 2<br>0<br>1<br>9 |
| Rh<br>eu<br>ma<br>toi<br>d<br>Ar<br>thr<br>itis | C<br>00<br>03<br>87<br>3 | MI<br>R5<br>51<br>B             | 6<br>9<br>3<br>1<br>3<br>6 |            | microRNA<br>551b                       |                                             | 31      | 0<br>.<br>6<br>8<br>2 | 0<br>.<br>5<br>3<br>8 |                                  | 0.<br>01 |  | 1 | 1 | 0 | 20<br>18 | 2<br>0<br>1<br>8 |
| Rh<br>eu<br>ma<br>toi<br>d<br>Ar<br>thr<br>itis | C<br>00<br>03<br>87<br>3 | MI<br>R5<br>73                  | 6<br>9<br>3<br>1<br>5<br>8 |            | microRNA<br>573                        |                                             | 17      | 0<br>.<br>7<br>4<br>3 | 0<br>.<br>3<br>8<br>5 |                                  | 0.<br>01 |  | 1 | 1 | 0 | 20<br>16 | 2<br>0<br>1<br>6 |
| Rh<br>eu<br>ma<br>toi                           | C<br>00<br>03            | MI<br>R5<br>90                  | 6<br>9<br>3<br>1           |            | microRNA<br>590                        |                                             | 99      | 0<br>.<br>5           | 0<br>.<br>6           |                                  | 0.<br>01 |  | 1 | 1 | 0 | 20<br>19 | 2<br>0<br>1<br>9 |

|                                                 |                          |                     |                            |                    |                                        |         |                       |                       |                                  |          |  |   |   |   |          |                  |
|-------------------------------------------------|--------------------------|---------------------|----------------------------|--------------------|----------------------------------------|---------|-----------------------|-----------------------|----------------------------------|----------|--|---|---|---|----------|------------------|
| d<br>Ar<br>thr<br>itis                          | 87<br>3                  |                     | 7<br>5                     |                    |                                        |         | 5<br>3                | 9<br>2                |                                  |          |  |   |   |   |          |                  |
| Rh<br>eu<br>ma<br>toi<br>d<br>Ar<br>thr<br>itis | C<br>00<br>03<br>87<br>3 | MI<br>R6<br>13      | 6<br>9<br>3<br>1<br>9<br>8 |                    | microRNA<br>613                        | 60      | 0<br>.<br>6<br>0<br>8 | 0<br>.<br>6<br>1<br>5 |                                  | 0.<br>01 |  | 1 | 1 | 0 | 20<br>19 | 2<br>0<br>1<br>9 |
| Rh<br>eu<br>ma<br>toi<br>d<br>Ar<br>thr<br>itis | C<br>00<br>03<br>87<br>3 | MI<br>R6<br>33      | 6<br>9<br>3<br>2<br>1<br>8 |                    | microRNA<br>633                        | 12      | 0<br>.<br>7<br>6<br>9 | 0<br>.<br>3<br>4<br>6 |                                  | 0.<br>01 |  | 1 | 1 | 0 | 20<br>18 | 2<br>0<br>1<br>8 |
| Rh<br>eu<br>ma<br>toi<br>d<br>Ar<br>thr<br>itis | C<br>00<br>03<br>87<br>3 | MI<br>R6<br>42<br>A | 6<br>9<br>3<br>2<br>2<br>7 |                    | microRNA<br>642a                       | 12      | 0<br>.<br>7<br>6<br>9 | 0<br>.<br>3<br>0<br>8 |                                  | 0.<br>01 |  | 1 | 1 | 0 | 20<br>19 | 2<br>0<br>1<br>9 |
| Rh<br>eu<br>ma<br>toi<br>d<br>Ar<br>thr<br>itis | C<br>00<br>03<br>87<br>3 | TC<br>F7<br>L2      | 6<br>9<br>3<br>4           | Q9N<br>QB0         | transcription<br>factor 7 like 2       | 25<br>7 | 0<br>.<br>4<br>8<br>5 | 0<br>.<br>8<br>4<br>6 | 0.<br>9<br>9<br>5<br>3<br>7      | 0.<br>01 |  | 1 | 1 | 1 | 20<br>12 | 2<br>0<br>1<br>2 |
| Rh<br>eu<br>ma<br>toi<br>d<br>Ar<br>thr<br>itis | C<br>00<br>03<br>87<br>3 | TC<br>N2            | 6<br>9<br>4<br>8           | P2006<br>2         | transcobalami<br>n 2                   | 10<br>4 | 0<br>.<br>5<br>7<br>8 | 0<br>.<br>6<br>1<br>5 | 1.<br>0<br>5<br>E<br>-<br>0<br>6 | 0.<br>01 |  | 1 | 1 | 0 | 20<br>15 | 2<br>0<br>1<br>5 |
| Rh<br>eu<br>ma<br>toi<br>d<br>Ar<br>thr<br>itis | C<br>00<br>03<br>87<br>3 | TR<br>AV<br>6       | 6<br>9<br>5<br>6           | A0A0<br>75B6<br>T7 | T cell receptor<br>alpha variable<br>6 | 1       | 1                     | 0<br>.<br>1<br>1<br>5 |                                  | 0.<br>01 |  | 1 | 1 | 0 | 19<br>98 | 1<br>9<br>9<br>8 |

|                      |          |            |      |        |                                                       |                         |    |       |       |          |      |  |   |   |   |      |      |
|----------------------|----------|------------|------|--------|-------------------------------------------------------|-------------------------|----|-------|-------|----------|------|--|---|---|---|------|------|
| Rheumatoid Arthritis | C0003873 | BT N1 A1   | 696  | Q13410 | butyrophilin subfamily 1 member A1                    | Enzyme modulator        | 9  | 0.839 | 0.346 | 1.95E-08 | 0.01 |  | 1 | 1 | 0 | 2011 | 2011 |
| Rheumatoid Arthritis | C0003873 | TR D       | 6964 |        | T cell receptor delta locus                           |                         | 45 | 0.65  | 0.692 |          | 0.01 |  | 1 | 1 | 0 | 1994 | 1994 |
| Rheumatoid Arthritis | C0003873 | TR G       | 6965 |        | T cell receptor gamma locus                           |                         | 54 | 0.631 | 0.538 |          | 0.01 |  | 0 | 1 | 0 | 1995 | 1995 |
| Rheumatoid Arthritis | C0003873 | TR GC 1    | 6966 | P0CF51 | T cell receptor gamma constant 1                      |                         | 35 | 0.663 | 0.385 |          | 0.01 |  | 0 | 1 | 0 | 1995 | 1995 |
| Rheumatoid Arthritis | C0003873 | PP P1 R1 1 | 6992 | O60927 | protein phosphatase 1 regulatory inhibitor subunit 11 | Enzyme modulator        | 66 | 0.604 | 0.731 | 0.3581   | 0.01 |  | 1 | 1 | 1 | 2017 | 2017 |
| Rheumatoid Arthritis | C0003873 | TD GF 1    | 6997 | P13385 | teratocarcinoma-derived growth factor 1               | Calcium-binding protein | 95 | 0.584 | 0.731 | 9.16E-11 | 0.01 |  | 1 | 1 | 0 | 1996 | 1996 |
| Rheumatoid           | C0003    | TD GF 1P3  | 6998 | P51864 | teratocarcinoma-derived growth                        | Calcium-                | 52 | 0.6   | 0.5   |          | 0.01 |  | 1 | 1 | 0 | 1996 | 1996 |

|                                                 |                          |               |                  |            |                                                                        |                                                |         |                       |                       |                                  |          |  |   |   |   |          |                  |
|-------------------------------------------------|--------------------------|---------------|------------------|------------|------------------------------------------------------------------------|------------------------------------------------|---------|-----------------------|-----------------------|----------------------------------|----------|--|---|---|---|----------|------------------|
| d<br>Ar<br>thr<br>itis                          | 87<br>3                  |               |                  |            | factor 1<br>pseudog<br>ene 3                                           | bin<br>din<br>g<br>pro<br>tei<br>n             |         | 3<br>1                |                       |                                  |          |  |   |   |   |          |                  |
| Rh<br>eu<br>ma<br>toi<br>d<br>Ar<br>thr<br>itis | C<br>00<br>03<br>87<br>3 | PR<br>DX<br>2 | 7<br>0<br>0<br>1 | P3211<br>9 | peroxire<br>doxin 2                                                    | En<br>zy<br>me                                 | 24<br>3 | 0<br>.<br>4<br>7<br>4 | 0<br>.<br>8<br>8<br>5 | 0.<br>0<br>8<br>6<br>5<br>1<br>3 | 0.<br>01 |  | 1 | 1 | 0 | 20<br>12 | 2<br>0<br>1<br>2 |
| Rh<br>eu<br>ma<br>toi<br>d<br>Ar<br>thr<br>itis | C<br>00<br>03<br>87<br>3 | TE<br>F       | 7<br>0<br>0<br>8 | Q105<br>87 | TEF<br>transcrip<br>tion<br>factor,<br>PAR<br>bZIP<br>family<br>member | Nu<br>cle<br>ic<br>aci<br>d<br>bin<br>din<br>g | 34      | 0<br>.<br>6<br>8<br>6 | 0<br>.<br>5<br>3<br>8 | 0.<br>6<br>3<br>2<br>9<br>1      | 0.<br>01 |  | 1 | 1 | 0 | 20<br>13 | 2<br>0<br>1<br>3 |
| Rh<br>eu<br>ma<br>toi<br>d<br>Ar<br>thr<br>itis | C<br>00<br>03<br>87<br>3 | TE<br>P1      | 7<br>0<br>1<br>1 | Q999<br>73 | telomerase<br>associated<br>protein 1                                  |                                                | 54      | 0<br>.<br>6<br>2<br>1 | 0<br>.<br>6<br>5<br>4 | 4.<br>3<br>8<br>E<br>-<br>4<br>9 | 0.<br>01 |  | 0 | 1 | 0 | 20<br>00 | 2<br>0<br>0<br>0 |
| Rh<br>eu<br>ma<br>toi<br>d<br>Ar<br>thr<br>itis | C<br>00<br>03<br>87<br>3 | TE<br>RF<br>2 | 7<br>0<br>1<br>4 | Q155<br>54 | telomeric<br>repeat binding<br>factor 2                                |                                                | 12<br>5 | 0<br>.<br>5<br>4<br>1 | 0<br>.<br>7<br>3<br>1 | 0.<br>9<br>9<br>2<br>3<br>7      | 0.<br>01 |  | 0 | 1 | 0 | 20<br>00 | 2<br>0<br>0<br>0 |
| Rh<br>eu<br>ma<br>toi<br>d<br>Ar<br>thr<br>itis | C<br>00<br>03<br>87<br>3 | TE<br>RT      | 7<br>0<br>1<br>5 | O147<br>46 | telomera<br>se<br>reverse<br>transcrip<br>tase                         | En<br>zy<br>me                                 | 70<br>3 | 0<br>.<br>3<br>7<br>4 | 0<br>.<br>8<br>4<br>6 | 0.<br>9<br>9<br>0<br>4<br>6      | 0.<br>01 |  | 1 | 1 | 1 | 20<br>07 | 2<br>0<br>0<br>7 |
| Rh<br>eu<br>ma<br>toi<br>d<br>Ar<br>thr<br>itis | C<br>00<br>03<br>87<br>3 | TF            | 7<br>0<br>1<br>8 | P0278<br>7 | transferr<br>in                                                        | En<br>zy<br>me                                 | 16<br>8 | 0<br>.<br>5<br>2<br>7 | 0<br>.<br>8<br>4<br>6 | 4.<br>1<br>E<br>-<br>0<br>8      | 0.<br>01 |  | 1 | 1 | 0 | 20<br>02 | 2<br>0<br>0<br>2 |

|                      |          |        |      |        |                                               |                      |     |       |        |          |      |  |   |   |   |      |      |
|----------------------|----------|--------|------|--------|-----------------------------------------------|----------------------|-----|-------|--------|----------|------|--|---|---|---|------|------|
| Rheumatoid Arthritis | C0003873 | NR2F1  | 7025 | P10589 | nuclear receptor subfamily 2 group F member 1 | Nuclear receptor     | 53  | 0.656 | 0.644  | 0.9482   | 0.01 |  | 1 | 1 | 0 | 2000 | 2000 |
| Rheumatoid Arthritis | C0003873 | TFDP1  | 7027 | Q14186 | transcription factor Dp-1                     | Nucleic acid binding | 56  | 0.623 | 0.692  | 0.9174   | 0.01 |  | 1 | 1 | 0 | 2019 | 2019 |
| Rheumatoid Arthritis | C0003873 | TF F1  | 7031 | P04155 | trefoil factor 1                              | Signaling            | 147 | 0.529 | 0.769  | 0.0889   | 0.01 |  | 1 | 1 | 0 | 2019 | 2019 |
| Rheumatoid Arthritis | C0003873 | TF F2  | 7032 | Q03403 | trefoil factor 2                              | Signaling            | 72  | 0.611 | 0.538  | 2.22E-07 | 0.01 |  | 1 | 1 | 0 | 2019 | 2019 |
| Rheumatoid Arthritis | C0003873 | TGFB2  | 7042 | P61812 | transforming growth factor beta 2             | Signaling            | 389 | 0.433 | 0.885  | 0.9905   | 0.01 |  | 1 | 1 | 0 | 2007 | 2007 |
| Rheumatoid Arthritis | C0003873 | TGFB3  | 7043 | P10600 | transforming growth factor beta 3             | Signaling            | 230 | 0.498 | 0.8827 | 0.987    | 0.01 |  | 1 | 1 | 0 | 2010 | 2010 |
| Rheumatoid Ar        | C0003873 | TG FBI | 7045 | Q15582 | transforming growth factor beta induced       | Signaling            | 225 | 0.484 | 0.769  | 5.97E-   | 0.01 |  | 1 | 1 | 0 | 2006 | 2006 |

|                                                 |                          |                |                  |            |                                                               |                                                            |         |                       |                                 |                                  |          |  |   |   |   |                         |
|-------------------------------------------------|--------------------------|----------------|------------------|------------|---------------------------------------------------------------|------------------------------------------------------------|---------|-----------------------|---------------------------------|----------------------------------|----------|--|---|---|---|-------------------------|
| thr<br>itis                                     |                          |                |                  |            |                                                               |                                                            |         |                       | 0<br>8                          |                                  |          |  |   |   |   |                         |
| Rh<br>eu<br>ma<br>toi<br>d<br>Ar<br>thr<br>itis | C<br>00<br>03<br>87<br>3 | TG<br>FB<br>R1 | 7<br>0<br>4<br>6 | P3689<br>7 | transfor<br>ming<br>growth<br>factor<br>beta<br>receptor<br>1 | Ki<br>nas<br>e                                             | 34<br>7 | 0<br>.<br>4<br>5<br>1 | 0<br>.<br>8<br>8<br>5           | 0.<br>8<br>5<br>3<br>7<br>9      | 0.<br>01 |  | 1 | 1 | 0 | 20<br>07<br>0<br>0<br>7 |
| Rh<br>eu<br>ma<br>toi<br>d<br>Ar<br>thr<br>itis | C<br>00<br>03<br>87<br>3 | TG<br>IF1      | 7<br>0<br>5<br>0 | Q155<br>83 | TGFB<br>induced<br>factor<br>homeob<br>ox 1                   | En<br>zy<br>me                                             | 10<br>0 | 0<br>.<br>5<br>8<br>8 | 0<br>.<br>7<br>6<br>9           | 0.<br>0<br>1<br>0<br>4<br>5<br>4 | 0.<br>01 |  | 1 | 1 | 0 | 20<br>05<br>0<br>0<br>5 |
| Rh<br>eu<br>ma<br>toi<br>d<br>Ar<br>thr<br>itis | C<br>00<br>03<br>87<br>3 | TH<br>AS       | 7<br>0<br>5<br>5 |            | thoracoabdom<br>inal syndrome                                 |                                                            | 12<br>0 | 0<br>.<br>5<br>6      | 0<br>.<br>8<br>0<br>8           |                                  | 0.<br>01 |  | 1 | 1 | 0 | 20<br>18<br>0<br>1<br>8 |
| Rh<br>eu<br>ma<br>toi<br>d<br>Ar<br>thr<br>itis | C<br>00<br>03<br>87<br>3 | NK<br>X2-<br>1 | 7<br>0<br>8<br>0 | P4369<br>9 | NK2<br>homeob<br>ox 1                                         | Tr<br>ans<br>cri<br>pti<br>on<br>fac<br>tor                | 31<br>9 | 0<br>.<br>4<br>5<br>7 | 0<br>.<br>8<br>0<br>8           | 0.<br>3<br>5<br>8<br>7<br>4      | 0.<br>01 |  | 1 | 1 | 0 | 20<br>18<br>0<br>1<br>8 |
| Rh<br>eu<br>ma<br>toi<br>d<br>Ar<br>thr<br>itis | C<br>00<br>03<br>87<br>3 | TN<br>NC<br>1  | 7<br>1<br>3<br>4 | P6331<br>6 | troponin<br>C1, slow<br>skeletal<br>and<br>cardiac<br>type    | Ca<br>lci<br>um<br>-<br>bin<br>din<br>g<br>pro<br>tei<br>n | 54      | 0<br>.<br>6<br>4<br>7 | 0<br>.<br>4<br>6<br>2<br>3<br>3 | 0.<br>6<br>7<br>8<br>3<br>3      | 0.<br>01 |  | 1 | 1 | 0 | 20<br>18<br>0<br>1<br>8 |
| Rh<br>eu<br>ma<br>toi<br>d<br>Ar<br>thr<br>itis | C<br>00<br>03<br>87<br>3 | TN<br>NI3      | 7<br>1<br>3<br>7 | P1942<br>9 | troponin<br>I3,<br>cardiac<br>type                            | Ce<br>llul<br>ar<br>str<br>uct<br>ure                      | 15<br>9 | 0<br>.<br>5<br>2      | 0<br>.<br>7<br>6<br>9           | 0.<br>0<br>9<br>6<br>2<br>8<br>4 | 0.<br>01 |  | 1 | 1 | 0 | 20<br>18<br>0<br>1<br>8 |

|                      |          |          |      |               |                                               |                      |     |       |       |          |      |  |   |   |   |      |      |
|----------------------|----------|----------|------|---------------|-----------------------------------------------|----------------------|-----|-------|-------|----------|------|--|---|---|---|------|------|
| Rheumatoid Arthritis | C0003873 | TP73     | 7161 | O15350        | tumor protein p73                             | Transcription factor | 300 | 0.449 | 0.808 | 0.996    | 0.01 |  | 1 | 1 | 0 | 2017 | 2017 |
| Rheumatoid Arthritis | C0003873 | TPSAB1   | 7177 | P20231;Q15661 | tryptase alpha/beta 1                         | Enzyme               | 23  | 0.722 | 0.75  | 1.27E-13 | 0.01 |  | 1 | 1 | 0 | 2007 | 2007 |
| Rheumatoid Arthritis | C0003873 | TPT1     | 7178 | P13693        | tumor protein, translationally-controlled 1   | Cellular structure   | 143 | 0.528 | 0.731 | 0.8048   | 0.01 |  | 1 | 1 | 0 | 2008 | 2008 |
| Rheumatoid Arthritis | C0003873 | NR2C2    | 7182 | P49116        | nuclear receptor subfamily 2 group C member 2 | Nuclear receptor     | 131 | 0.534 | 0.808 | 0.992    | 0.01 |  | 1 | 1 | 0 | 2020 | 2020 |
| Rheumatoid Arthritis | C0003873 | HSBP90B1 | 7184 | P14625        | heat shock protein 90 beta family member 1    | Chaperone            | 155 | 0.522 | 0.808 | 0.992    | 0.01 |  | 1 | 1 | 0 | 2009 | 2009 |
| Rheumatoid Arthritis | C0003873 | TRAF3    | 7187 | Q13114        | TNF receptor associated factor 3              | Signaling            | 129 | 0.541 | 0.769 | 0.9969   | 0.01 |  | 1 | 1 | 0 | 2018 | 2018 |
| Rheumatoid Ar        | C0003873 | TRAF5    | 7188 | O00463        | TNF receptor associated factor 5              | Signaling            | 36  | 0.659 | 0.654 | 1.67E-   | 0.01 |  | 1 | 1 | 0 | 2007 | 2007 |

|                                                 |                          |                      |                  |            |                                                                                           |                                                              |         |                       |                                           |                                  |          |  |   |   |   |          |                  |
|-------------------------------------------------|--------------------------|----------------------|------------------|------------|-------------------------------------------------------------------------------------------|--------------------------------------------------------------|---------|-----------------------|-------------------------------------------|----------------------------------|----------|--|---|---|---|----------|------------------|
| thr<br>itis                                     |                          |                      |                  |            |                                                                                           |                                                              |         |                       |                                           | 1<br>2                           |          |  |   |   |   |          |                  |
| Rh<br>eu<br>ma<br>toi<br>d<br>Ar<br>thr<br>itis | C<br>00<br>03<br>87<br>3 | C3<br>AR<br>1        | 7<br>1<br>9      | Q165<br>81 | comple<br>ment<br>C3a<br>receptor<br>1                                                    | G-<br>pro<br>tei<br>n<br>co<br>upl<br>ed<br>rec<br>ept<br>or | 73      | 0<br>.<br>6<br>0<br>1 | 0<br>.<br>7<br>3<br>1<br>E<br>-<br>0<br>9 | 3.<br>3<br>1<br>E<br>-<br>0<br>9 | 0.<br>01 |  | 1 | 1 | 0 | 20<br>17 | 2<br>0<br>1<br>7 |
| Rh<br>eu<br>ma<br>toi<br>d<br>Ar<br>thr<br>itis | C<br>00<br>03<br>87<br>3 | HS<br>P90<br>B2<br>P | 7<br>1<br>9<br>0 | Q58F<br>F3 | heat<br>shock<br>protein<br>90 beta<br>family<br>member<br>2,<br>pseudog<br>ene           | Ch<br>ap<br>ero<br>ne                                        | 11<br>0 | 0<br>.<br>5<br>5<br>8 | 0<br>.<br>8<br>4<br>6                     |                                  | 0.<br>01 |  | 1 | 1 | 0 | 20<br>11 | 2<br>0<br>1<br>1 |
| Rh<br>eu<br>ma<br>toi<br>d<br>Ar<br>thr<br>itis | C<br>00<br>03<br>87<br>3 | CC<br>T3             | 7<br>2<br>0<br>3 | P4936<br>8 | chapero<br>nin<br>containi<br>ng TCP1<br>subunit<br>3                                     | Ch<br>ap<br>ero<br>ne                                        | 43      | 0<br>.<br>6<br>5      | 0<br>.<br>5<br>7<br>7                     | 0.<br>9<br>9<br>9<br>8           | 0.<br>01 |  | 1 | 1 | 0 | 20<br>15 | 2<br>0<br>1<br>5 |
| Rh<br>eu<br>ma<br>toi<br>d<br>Ar<br>thr<br>itis | C<br>00<br>03<br>87<br>3 | TR<br>PC<br>1        | 7<br>2<br>2<br>0 | P4899<br>5 | transient<br>receptor<br>potential<br>cation<br>channel<br>subfamil<br>y C<br>member<br>1 | Ion<br>ch<br>an<br>nel                                       | 97      | 0<br>.<br>5<br>6<br>6 | 0<br>.<br>7<br>6<br>9                     | 0.<br>0<br>1<br>2<br>9<br>0<br>4 | 0.<br>01 |  | 1 | 1 | 0 | 20<br>08 | 2<br>0<br>0<br>8 |
| Rh<br>eu<br>ma<br>toi<br>d<br>Ar<br>thr<br>itis | C<br>00<br>03<br>87<br>3 | TR<br>PC<br>5        | 7<br>2<br>2<br>4 | Q9UL<br>62 | transient<br>receptor<br>potential<br>cation<br>channel<br>subfamil<br>y C<br>member<br>5 | Ion<br>ch<br>an<br>nel                                       | 58      | 0<br>.<br>6<br>5<br>3 | 0<br>.<br>6<br>1<br>5                     | 0.<br>9<br>9<br>9<br>7<br>3      | 0.<br>01 |  | 1 | 1 | 0 | 20<br>08 | 2<br>0<br>0<br>8 |
| Rh<br>eu<br>ma<br>toi<br>d<br>Ar                | C<br>00<br>03<br>87<br>3 | TR<br>PM<br>2        | 7<br>2<br>2<br>6 | O947<br>59 | transient<br>receptor<br>potential<br>cation<br>channel<br>subfamil<br>y M                | Ion<br>ch<br>an<br>nel                                       | 13<br>3 | 0<br>.<br>5<br>4<br>6 | 0<br>.<br>7<br>3<br>1                     | 8.<br>9<br>6<br>E<br>-<br>4<br>4 | 0.<br>01 |  | 1 | 1 | 0 | 20<br>19 | 2<br>0<br>1<br>9 |



|                                                 |                          |                     |                            |            |                                         |                |         |                       |                       |                                  |          |  |   |   |   |          |                  |
|-------------------------------------------------|--------------------------|---------------------|----------------------------|------------|-----------------------------------------|----------------|---------|-----------------------|-----------------------|----------------------------------|----------|--|---|---|---|----------|------------------|
| thr<br>itis                                     |                          |                     |                            |            | member<br>2                             |                |         |                       |                       |                                  |          |  |   |   |   |          |                  |
| Rh<br>eu<br>ma<br>toi<br>d<br>Ar<br>thr<br>itis | C<br>00<br>03<br>87<br>3 | MI<br>R6<br>50      | 7<br>2<br>3<br>7<br>7<br>8 |            | microRNA<br>650                         |                | 35      | 0<br>.<br>6<br>7      | 0<br>.<br>5<br>7<br>7 |                                  | 0.<br>01 |  | 1 | 1 | 0 | 20<br>17 | 2<br>0<br>1<br>7 |
| Rh<br>eu<br>ma<br>toi<br>d<br>Ar<br>thr<br>itis | C<br>00<br>03<br>87<br>3 | MI<br>R6<br>63<br>A | 7<br>2<br>4<br>0<br>3<br>3 |            | microRNA<br>663a                        |                | 81      | 0<br>.<br>5<br>7<br>6 | 0<br>.<br>7<br>6<br>9 |                                  | 0.<br>01 |  | 1 | 1 | 0 | 20<br>15 | 2<br>0<br>1<br>5 |
| Rh<br>eu<br>ma<br>toi<br>d<br>Ar<br>thr<br>itis | C<br>00<br>03<br>87<br>3 | TT<br>N             | 7<br>2<br>7<br>3           | Q8W<br>Z42 | titin                                   | Ki<br>nas<br>e | 36<br>6 | 0<br>.<br>4<br>7      | 0<br>.<br>8<br>8<br>5 | 2.<br>5<br>6<br>E<br>-<br>9<br>6 | 0.<br>01 |  | 1 | 1 | 0 | 20<br>14 | 2<br>0<br>1<br>4 |
| Rh<br>eu<br>ma<br>toi<br>d<br>Ar<br>thr<br>itis | C<br>00<br>03<br>87<br>3 | SF<br>TP<br>A2      | 7<br>2<br>9<br>2<br>3<br>8 | Q8IW<br>L1 | surfactant<br>protein A2                |                | 11<br>1 | 0<br>.<br>5<br>6<br>3 | 0<br>.<br>7<br>3<br>1 | 0.<br>0<br>0<br>9<br>2<br>5<br>1 | 0.<br>01 |  | 1 | 1 | 0 | 20<br>06 | 2<br>0<br>0<br>6 |
| Rh<br>eu<br>ma<br>toi<br>d<br>Ar<br>thr<br>itis | C<br>00<br>03<br>87<br>3 | TY<br>RO<br>3       | 7<br>3<br>0<br>1           | Q064<br>18 | TYRO3<br>protein<br>tyrosine<br>kinase  | Ki<br>nas<br>e | 10<br>9 | 0<br>.<br>5<br>5<br>9 | 0<br>.<br>7<br>6<br>9 | 8.<br>3<br>3<br>E<br>-<br>1<br>0 | 0.<br>01 |  | 1 | 1 | 0 | 20<br>18 | 2<br>0<br>1<br>8 |
| Rh<br>eu<br>ma<br>toi<br>d<br>Ar<br>thr<br>itis | C<br>00<br>03<br>87<br>3 | TY<br>RP<br>1       | 7<br>3<br>0<br>6           | P1764<br>3 | tyrosina<br>se<br>related<br>protein 1  | En<br>zy<br>me | 20<br>0 | 0<br>.<br>5<br>0<br>7 | 0<br>.<br>8<br>4<br>6 | 6.<br>5<br>6<br>E<br>-<br>2<br>5 | 0.<br>01 |  | 1 | 1 | 0 | 20<br>19 | 2<br>0<br>1<br>9 |
| Rh<br>eu<br>ma<br>toi                           | C<br>00<br>03            | UB<br>E2<br>N       | 7<br>3<br>3<br>4           | P6108<br>8 | ubiquitin<br>conjugating<br>enzyme E2 N |                | 80      | 0<br>.<br>5           | 0<br>.<br>6           | 0.<br>8<br>8<br>1                | 0.<br>01 |  | 1 | 1 | 0 | 20<br>18 | 2<br>0<br>1<br>8 |

|                                                 |                          |          |                  |            |                                                                |                         |         |                       |                            |                                  |          |  |   |   |   |          |                  |
|-------------------------------------------------|--------------------------|----------|------------------|------------|----------------------------------------------------------------|-------------------------|---------|-----------------------|----------------------------|----------------------------------|----------|--|---|---|---|----------|------------------|
| d<br>Ar<br>thr<br>itis                          | 87<br>3                  |          |                  |            |                                                                |                         | 9<br>3  | 5<br>4                | 5<br>6                     |                                  |          |  |   |   |   |          |                  |
| Rh<br>eu<br>ma<br>toi<br>d<br>Ar<br>thr<br>itis | C<br>00<br>03<br>87<br>3 | UB<br>TF | 7<br>3<br>4<br>3 | P1748<br>0 | upstream<br>binding<br>transcription<br>factor                 |                         | 44      | 0<br>.<br>7<br>0<br>5 | 0<br>.<br>4<br>6<br>2      | 1                                | 0.<br>01 |  | 1 | 1 | 0 | 19<br>93 | 1<br>9<br>9<br>3 |
| Rh<br>eu<br>ma<br>toi<br>d<br>Ar<br>thr<br>itis | C<br>00<br>03<br>87<br>3 | UC<br>N  | 7<br>3<br>4<br>9 | P5508<br>9 | urocorti<br>n                                                  | Sig<br>nal<br>ing       | 13<br>4 | 0<br>.<br>5<br>3<br>9 | 0<br>.<br>7<br>6<br>9<br>9 | 0.<br>4<br>4<br>9<br>5<br>8      | 0.<br>01 |  | 1 | 1 | 0 | 20<br>01 | 2<br>0<br>0<br>1 |
| Rh<br>eu<br>ma<br>toi<br>d<br>Ar<br>thr<br>itis | C<br>00<br>03<br>87<br>3 | UC<br>P2 | 7<br>3<br>5<br>1 | P5585<br>1 | uncoupli<br>ng<br>protein 2                                    | Tr<br>ans<br>por<br>ter | 23<br>5 | 0<br>.<br>4<br>9<br>3 | 0<br>.<br>8<br>0<br>8      | 1.<br>5<br>5<br>E<br>-<br>1<br>0 | 0.<br>01 |  | 1 | 1 | 0 | 20<br>09 | 2<br>0<br>0<br>9 |
| Rh<br>eu<br>ma<br>toi<br>d<br>Ar<br>thr<br>itis | C<br>00<br>03<br>87<br>3 | UG<br>CG | 7<br>3<br>5<br>7 | Q167<br>39 | UDP-<br>glucose<br>ceramid<br>e<br>glucosyl<br>transfera<br>se | En<br>zy<br>me          | 11<br>1 | 0<br>.<br>5<br>6      | 0<br>.<br>8<br>0<br>8      | 0.<br>9<br>4<br>1<br>4<br>7      | 0.<br>01 |  | 1 | 1 | 0 | 19<br>99 | 1<br>9<br>9<br>9 |
| Rh<br>eu<br>ma<br>toi<br>d<br>Ar<br>thr<br>itis | C<br>00<br>03<br>87<br>3 | UN<br>G  | 7<br>3<br>7<br>4 | P1305<br>1 | uracil DNA<br>glycosylase                                      |                         | 66      | 0<br>.<br>6<br>1<br>7 | 0<br>.<br>6<br>5<br>4      | 0.<br>0<br>0<br>1<br>7<br>2<br>5 | 0.<br>01 |  | 1 | 1 | 0 | 20<br>12 | 2<br>0<br>1<br>2 |
| Rh<br>eu<br>ma<br>toi<br>d<br>Ar<br>thr<br>itis | C<br>00<br>03<br>87<br>3 | UT<br>RN | 7<br>4<br>0<br>2 | P4693<br>9 | utrophin                                                       |                         | 15<br>2 | 0<br>.<br>5<br>2<br>5 | 0<br>.<br>6<br>9<br>2      | 1<br>E<br>-<br>1<br>9            | 0.<br>01 |  | 1 | 1 | 0 | 20<br>20 | 2<br>0<br>2<br>0 |

|                      |          |       |      |        |                                                                  |                            |     |       |        |          |      |  |   |   |   |      |      |
|----------------------|----------|-------|------|--------|------------------------------------------------------------------|----------------------------|-----|-------|--------|----------|------|--|---|---|---|------|------|
| Rheumatoid Arthritis | C0003873 | KDM6A | 7403 | O15550 | lysine demethylase 6A                                            | Epigenetic regulator       | 238 | 0.498 | 0.769  | 1        | 0.01 |  | 1 | 1 | 0 | 2019 | 2019 |
| Rheumatoid Arthritis | C0003873 | VAV1  | 7409 | P15498 | vav guanine nucleotide exchange factor 1                         |                            | 103 | 0.556 | 0.7993 | 0.993    | 0.01 |  | 1 | 1 | 4 | 2017 | 2017 |
| Rheumatoid Arthritis | C0003873 | VDAC1 | 7416 | P21796 | voltage dependent anion channel 1                                |                            | 116 | 0.556 | 0.7266 | 0.966    | 0.01 |  | 1 | 1 | 0 | 2018 | 2018 |
| Rheumatoid Arthritis | C0003873 | VIPR1 | 7433 | P32241 | vasoactive intestinal peptide receptor 1                         | G-protein coupled receptor | 102 | 0.573 | 0.654  | 7.44E-27 | 0.01 |  | 1 | 1 | 0 | 2008 | 2008 |
| Rheumatoid Arthritis | C0003873 | TRPV1 | 7442 | Q8NER1 | transient receptor potential cation channel subfamily V member 1 | Ion channel                | 404 | 0.446 | 0.885  | 1.01E-16 | 0.01 |  | 1 | 1 | 0 | 2007 | 2007 |
| Rheumatoid Arthritis | C0003873 | WNT1  | 7471 | P04628 | Wnt family member 1                                              | Signaling                  | 216 | 0.495 | 0.7663 | 0.363    | 0.01 |  | 1 | 1 | 0 | 2000 | 2000 |
| Rheumatoid Arthritis | C0003873 | XBPI  | 74   | P17861 | X-box binding protein 1                                          |                            | 234 | 0.4   | 0.83   | 0.03     | 0.01 |  | 1 | 1 | 0 | 2014 | 2014 |

|                                                 |                          |                |                            |            |                                              |         |                       |                                      |                                  |          |  |   |   |   |          |                  |
|-------------------------------------------------|--------------------------|----------------|----------------------------|------------|----------------------------------------------|---------|-----------------------|--------------------------------------|----------------------------------|----------|--|---|---|---|----------|------------------|
| to<br>id<br>Ar<br>thr<br>itis                   | 87<br>3                  |                | 9<br>4                     |            |                                              |         | 7<br>7                | 4<br>6                               | 2<br>0<br>1<br>4                 |          |  |   |   |   |          | 1<br>4           |
| Rh<br>eu<br>ma<br>toi<br>d<br>Ar<br>thr<br>itis | C<br>00<br>03<br>87<br>3 | XB<br>PIP<br>1 | 7<br>4<br>9<br>5           |            | X-box binding<br>protein 1<br>pseudogene 1   | 42      | 0<br>.<br>6<br>5<br>3 | 0<br>.<br>6<br>9<br>2                |                                  | 0.<br>01 |  | 1 | 1 | 0 | 20<br>14 | 2<br>0<br>1<br>4 |
| Rh<br>eu<br>ma<br>toi<br>d<br>Ar<br>thr<br>itis | C<br>00<br>03<br>87<br>3 | XR<br>CC<br>4  | 7<br>5<br>1<br>8           | Q134<br>26 | X-ray repair<br>cross<br>complementin<br>g 4 | 19<br>2 | 0<br>.<br>5<br>2<br>8 | 0<br>.<br>7<br>6<br>9                | 8.<br>2<br>8<br>E<br>-<br>0<br>7 | 0.<br>01 |  | 1 | 1 | 0 | 20<br>15 | 2<br>0<br>1<br>5 |
| Rh<br>eu<br>ma<br>toi<br>d<br>Ar<br>thr<br>itis | C<br>00<br>03<br>87<br>3 | CA<br>2        | 7<br>6<br>0                | P0091<br>8 | carbonic<br>anhydrase 2                      | 21<br>0 | 0<br>.<br>5<br>0<br>6 | 0<br>.<br>8<br>0<br>8                | 1.<br>6<br>9<br>E<br>-<br>0<br>6 | 0.<br>01 |  | 1 | 1 | 0 | 20<br>01 | 2<br>0<br>0<br>1 |
| Rh<br>eu<br>ma<br>toi<br>d<br>Ar<br>thr<br>itis | C<br>00<br>03<br>87<br>3 | CA<br>3        | 7<br>6<br>1                | P0745<br>1 | carbonic<br>anhydrase 3                      | 37      | 0<br>.<br>6<br>8<br>2 | 0<br>.<br>5<br>0<br>1<br>7<br>2<br>5 | 0.<br>0<br>0<br>1<br>7<br>2<br>5 | 0.<br>01 |  | 1 | 1 | 0 | 20<br>15 | 2<br>0<br>1<br>5 |
| Rh<br>eu<br>ma<br>toi<br>d<br>Ar<br>thr<br>itis | C<br>00<br>03<br>87<br>3 | MI<br>R6<br>71 | 7<br>6<br>8<br>2<br>1<br>3 |            | microRNA<br>671                              | 47      | 0<br>.<br>6<br>3<br>6 | 0<br>.<br>5<br>7<br>7                |                                  | 0.<br>01 |  | 1 | 1 | 0 | 20<br>19 | 2<br>0<br>1<br>9 |
| Rh<br>eu<br>ma<br>toi<br>d<br>Ar<br>thr<br>itis | C<br>00<br>03<br>87<br>3 | MI<br>R7<br>66 | 7<br>6<br>8<br>2<br>1<br>8 |            | microRNA<br>766                              | 46      | 0<br>.<br>6<br>3<br>3 | 0<br>.<br>5<br>7<br>7                |                                  | 0.<br>01 |  | 1 | 1 | 0 | 20<br>19 | 2<br>0<br>1<br>9 |

|                      |          |        |        |        |                                                     |             |     |       |       |          |      |  |   |   |   |      |      |
|----------------------|----------|--------|--------|--------|-----------------------------------------------------|-------------|-----|-------|-------|----------|------|--|---|---|---|------|------|
| Rheumatoid Arthritis | C0003873 | CANCAS | 779    | Q13698 | calcium voltage-gated channel subunit alpha1 S      | Ion channel | 118 | 0.595 | 0.692 | 6.26E-12 | 0.01 |  | 1 | 1 | 0 | 2009 | 2009 |
| Rheumatoid Arthritis | C0003873 | PS     | 780904 |        | Potocki-Shaffer syndrome                            |             | 66  | 0.608 | 0.654 |          | 0.01 |  | 1 | 1 | 0 | 1991 | 1991 |
| Rheumatoid Arthritis | C0003873 | SCG2   | 7857   | P13521 | secretogranin II                                    |             | 57  | 0.628 | 0.615 | 2.12E-05 | 0.01 |  | 1 | 1 | 0 | 2000 | 2000 |
| Rheumatoid Arthritis | C0003873 | MANF   | 7873   | P55145 | mesencephalic astrocyte derived neurotrophic factor |             | 62  | 0.621 | 0.654 | 0.001391 | 0.01 |  | 1 | 1 | 0 | 2018 | 2018 |
| Rheumatoid Arthritis | C0003873 | GGCT   | 79017  | O75223 | gamma-glutamylcyclo transferase                     |             | 108 | 0.552 | 0.588 | 0.00143  | 0.01 |  | 1 | 1 | 0 | 2007 | 2007 |
| Rheumatoid Arthritis | C0003873 | AHNAK  | 79026  | Q09666 | AHNAK nucleoprotein                                 |             | 60  | 0.623 | 0.615 | 0.89827  | 0.01 |  | 1 | 1 | 0 | 2002 | 2002 |
| Rheumatoid Ar        | C0003873 | ASPS   | 79058  | Q9BZE9 | ASPSCR1 tether for SLC2A4, UBX domain containing    |             | 54  | 0.653 | 0.538 | 4.42E-   | 0.01 |  | 1 | 1 | 0 | 2019 | 2019 |

|                                                 |                          |                 |                            |            |                                                                      |                                             |         |                       |                       |                             |          |  |   |   |   |          |                  |
|-------------------------------------------------|--------------------------|-----------------|----------------------------|------------|----------------------------------------------------------------------|---------------------------------------------|---------|-----------------------|-----------------------|-----------------------------|----------|--|---|---|---|----------|------------------|
| thr<br>itis                                     |                          |                 |                            |            |                                                                      |                                             |         |                       |                       | 1<br>2                      |          |  |   |   |   |          |                  |
| Rh<br>eu<br>ma<br>toi<br>d<br>Ar<br>thr<br>itis | C<br>00<br>03<br>87<br>3 | TS<br>L         | 7<br>9<br>0<br>9<br>5<br>3 |            | testis-<br>expressed,<br>seven-twelve,<br>leukemia                   |                                             | 18      | 0<br>.<br>7<br>4<br>3 | 0<br>.<br>3<br>4<br>6 |                             | 0.<br>01 |  | 1 | 1 | 0 | 20<br>17 | 2<br>0<br>1<br>7 |
| Rh<br>eu<br>ma<br>toi<br>d<br>Ar<br>thr<br>itis | C<br>00<br>03<br>87<br>3 | DE<br>K         | 7<br>9<br>1<br>3           | P3565<br>9 | DEK proto-<br>oncogene                                               |                                             | 12<br>2 | 0<br>.<br>5<br>4<br>2 | 0<br>.<br>7<br>6<br>9 | 0.<br>1<br>3<br>0<br>6<br>5 | 0.<br>01 |  | 1 | 1 | 0 | 20<br>04 | 2<br>0<br>0<br>4 |
| Rh<br>eu<br>ma<br>toi<br>d<br>Ar<br>thr<br>itis | C<br>00<br>03<br>87<br>3 | OP<br>LL        | 7<br>9<br>3<br>3           |            | ossification of<br>posterior<br>longitudinal<br>ligament of<br>spine |                                             | 6       | 0<br>.<br>8<br>6<br>1 | 0<br>.<br>1<br>5<br>4 |                             | 0.<br>01 |  | 1 | 1 | 0 | 20<br>17 | 2<br>0<br>1<br>7 |
| Rh<br>eu<br>ma<br>toi<br>d<br>Ar<br>thr<br>itis | C<br>00<br>03<br>87<br>3 | BH<br>LH<br>E41 | 7<br>9<br>3<br>6<br>5      | Q9C0<br>J9 | basic<br>helix-<br>loop-<br>helix<br>family<br>member<br>e41         | Tr<br>ans<br>cri<br>pti<br>on<br>fac<br>tor | 63      | 0<br>.<br>6<br>2<br>3 | 0<br>.<br>5<br>7<br>7 | 0.<br>9<br>9<br>2<br>1<br>2 | 0.<br>01 |  | 1 | 1 | 0 | 20<br>15 | 2<br>0<br>1<br>5 |
| Rh<br>eu<br>ma<br>toi<br>d<br>Ar<br>thr<br>itis | C<br>00<br>03<br>87<br>3 | TF<br>EB        | 7<br>9<br>4<br>2           | P1948<br>4 | transcription<br>factor EB                                           |                                             | 15<br>0 | 0<br>.<br>5<br>2<br>7 | 0<br>.<br>7<br>3<br>1 | 0.<br>8<br>9<br>9<br>3<br>1 | 0.<br>01 |  | 1 | 1 | 0 | 20<br>20 | 2<br>0<br>2<br>0 |
| Rh<br>eu<br>ma<br>toi<br>d<br>Ar<br>thr<br>itis | C<br>00<br>03<br>87<br>3 | NT<br>T         | 7<br>9<br>5<br>6           |            | Noncoding<br>transcript in T<br>cells                                |                                             | 16      | 0<br>.<br>7<br>4<br>3 | 0<br>.<br>4<br>6<br>2 |                             | 0.<br>01 |  | 1 | 1 | 0 | 20<br>18 | 2<br>0<br>1<br>8 |
| Rh<br>eu<br>ma<br>toi                           | C<br>00<br>03            | NK<br>AP        | 7<br>9<br>5                | Q8N5<br>F7 | NFKB<br>activating<br>protein                                        |                                             | 15      | 0<br>.<br>7<br>6      | 0<br>.<br>2           | 0.<br>9<br>9<br>7           | 0.<br>01 |  | 1 | 1 | 0 | 20<br>13 | 2<br>0<br>1<br>3 |

|                                                 |                          |                       |                       |            |                                                  |                                       |         |                       |                       |                                  |          |  |   |   |   |          |                  |
|-------------------------------------------------|--------------------------|-----------------------|-----------------------|------------|--------------------------------------------------|---------------------------------------|---------|-----------------------|-----------------------|----------------------------------|----------|--|---|---|---|----------|------------------|
| d<br>Ar<br>thr<br>itis                          | 87<br>3                  |                       | 7<br>6                |            |                                                  |                                       |         |                       | 6<br>9                | 3<br>5                           |          |  |   |   |   |          |                  |
| Rh<br>eu<br>ma<br>toi<br>d<br>Ar<br>thr<br>itis | C<br>00<br>03<br>87<br>3 | SL<br>C5<br>2A<br>2   | 7<br>9<br>5<br>8<br>1 | Q9H<br>AB3 | solute<br>carrier<br>family<br>52<br>member<br>2 | Tr<br>ans<br>por<br>ter               | 26<br>1 | 0<br>.<br>4<br>8<br>3 | 0<br>.<br>8<br>0<br>8 | 0.<br>0<br>2<br>4<br>7<br>8      | 0.<br>01 |  | 1 | 1 | 0 | 20<br>12 | 2<br>0<br>1<br>2 |
| Rh<br>eu<br>ma<br>toi<br>d<br>Ar<br>thr<br>itis | C<br>00<br>03<br>87<br>3 | SP<br>AG<br>16        | 7<br>9<br>5<br>8<br>2 | Q8N0<br>X2 | sperm<br>associat<br>ed<br>antigen<br>16         | Ce<br>llul<br>ar<br>str<br>uct<br>ure | 17      | 0<br>.<br>7<br>6      | 0<br>.<br>3<br>8<br>5 | 1.<br>4<br>E<br>-<br>3<br>4      | 0.<br>01 |  | 1 | 1 | 1 | 20<br>14 | 2<br>0<br>1<br>4 |
| Rh<br>eu<br>ma<br>toi<br>d<br>Ar<br>thr<br>itis | C<br>00<br>03<br>87<br>3 | TN<br>FAI<br>P8<br>L2 | 7<br>9<br>6<br>2<br>6 | Q6P5<br>89 | TNF alpha<br>induced<br>protein 8 like 2         |                                       | 90      | 0<br>.<br>5<br>7<br>5 | 0<br>.<br>6<br>1<br>5 | 0.<br>0<br>3<br>8<br>3<br>6<br>4 | 0.<br>01 |  | 1 | 1 | 0 | 20<br>17 | 2<br>0<br>1<br>7 |
| Rh<br>eu<br>ma<br>toi<br>d<br>Ar<br>thr<br>itis | C<br>00<br>03<br>87<br>3 | NL<br>RX<br>1         | 7<br>9<br>6<br>7<br>1 | Q86U<br>T6 | NLR<br>family<br>member<br>X1                    | En<br>zy<br>me                        | 51      | 0<br>.<br>6<br>4<br>1 | 0<br>.<br>6<br>5<br>4 | 7.<br>7<br>3<br>E<br>-<br>3<br>1 | 0.<br>01 |  | 0 | 1 | 0 | 20<br>17 | 2<br>0<br>1<br>7 |
| Rh<br>eu<br>ma<br>toi<br>d<br>Ar<br>thr<br>itis | C<br>00<br>03<br>87<br>3 | LR<br>RC<br>31        | 7<br>9<br>7<br>8<br>2 | Q6U<br>Y01 | leucine rich<br>repeat<br>containing 31          |                                       | 7       | 0<br>.<br>8<br>3<br>9 | 0<br>.<br>2<br>6<br>9 | 2<br>E<br>-<br>0<br>6            | 0.<br>01 |  | 1 | 1 | 0 | 20<br>17 | 2<br>0<br>1<br>7 |
| Rh<br>eu<br>ma<br>toi<br>d<br>Ar<br>thr<br>itis | C<br>00<br>03<br>87<br>3 | SH<br>CB<br>P1        | 7<br>9<br>8<br>0<br>1 | Q8NE<br>M2 | SHC binding<br>and spindle<br>associated 1       |                                       | 72      | 0<br>.<br>6<br>0<br>6 | 0<br>.<br>6<br>5<br>4 | 9.<br>3<br>8<br>E<br>-<br>0<br>8 | 0.<br>01 |  | 1 | 1 | 0 | 20<br>02 | 2<br>0<br>0<br>2 |

|                      |          |         |       |                      |                                                                  |                         |     |       |       |          |      |  |   |   |   |      |      |
|----------------------|----------|---------|-------|----------------------|------------------------------------------------------------------|-------------------------|-----|-------|-------|----------|------|--|---|---|---|------|------|
| Rheumatoid Arthritis | C0003873 | CAMKMT  | 79823 | Q7Z624               | calmodulin-lysine N-methyltransferase                            |                         | 185 | 0.51  | 0.88  | 1.38E-15 | 0.01 |  | 1 | 1 | 0 | 2020 | 2020 |
| Rheumatoid Arthritis | C0003873 | CCDC134 | 79879 | Q9H6E4               | coiled-coil domain containing 134                                |                         | 19  | 0.769 | 0.308 | 6E-07    | 0.01 |  | 1 | 1 | 0 | 2017 | 2017 |
| Rheumatoid Arthritis | C0003873 | TNIP3   | 79931 | Q96KP6               | TNFAIP3 interacting protein 3                                    |                         | 12  | 0.76  | 0.308 | 0.00544  | 0.01 |  | 1 | 1 | 0 | 2012 | 2012 |
| Rheumatoid Arthritis | C0003873 | NA2A5   | 80018 | Q14CX7               | N-alpha-acetyltransferase 25, NatB auxiliary subunit             | Enzyme                  | 81  | 0.603 | 0.692 | 1        | 0.01 |  | 1 | 1 | 0 | 2009 | 2009 |
| Rheumatoid Arthritis | C0003873 | TRPM3   | 80036 | Q9HCF6               | transient receptor potential cation channel subfamily M member 3 | Ion channel             | 51  | 0.663 | 0.769 | 5.9E-07  | 0.01 |  | 1 | 1 | 0 | 2010 | 2010 |
| Rheumatoid Arthritis | C0003873 | CALM1   | 80011 | P0DP23;P0DP24;P0DP25 | calmodulin 1                                                     | Calcium-binding protein | 253 | 0.472 | 0.808 | 0.9473   | 0.01 |  | 1 | 1 | 0 | 2020 | 2020 |
| Rheumatoid Arthritis | C0003873 | ZC3H1   | 80011 | Q5D1E8               | zinc finger CCH-                                                 | Nucleic                 | 88  | 0.5   | 0.6   | 0.14     | 0.01 |  | 1 | 1 | 0 | 2012 | 2012 |



|                                                 |                          |                |                       |            |                                                            |                                             |         |                       |                       |                             |          |  |   |   |   |          |                  |
|-------------------------------------------------|--------------------------|----------------|-----------------------|------------|------------------------------------------------------------|---------------------------------------------|---------|-----------------------|-----------------------|-----------------------------|----------|--|---|---|---|----------|------------------|
| to<br>id<br>Ar<br>thr<br>itis                   | 87<br>3                  | 12<br>A        | 4<br>9                |            | type<br>containi<br>ng 12A                                 | aci<br>d<br>bin<br>din<br>g                 |         | 7<br>8                | 5<br>4                | 0<br>1<br>5                 |          |  |   |   |   |          | 1<br>2           |
| Rh<br>eu<br>ma<br>toi<br>d<br>Ar<br>thr<br>itis | C<br>00<br>03<br>87<br>3 | BR<br>D3       | 8<br>0<br>1<br>9      | Q150<br>59 | bromod<br>omain<br>containi<br>ng 3                        | Ep<br>ige<br>net<br>ic<br>reg<br>ula<br>tor | 42      | 0<br>.<br>7           | 0<br>.<br>5           | 0.<br>9<br>7<br>4<br>6<br>8 | 0.<br>01 |  | 1 | 1 | 0 | 20<br>16 | 2<br>0<br>1<br>6 |
| Rh<br>eu<br>ma<br>toi<br>d<br>Ar<br>thr<br>itis | C<br>00<br>03<br>87<br>3 | W<br>DR<br>26  | 8<br>0<br>2<br>3<br>2 | Q9H7<br>D7 | WD repeat<br>domain 26                                     |                                             | 90      | 0<br>.<br>6<br>0<br>6 | 0<br>.<br>7<br>6<br>9 | 1                           | 0.<br>01 |  | 1 | 1 | 0 | 20<br>17 | 2<br>0<br>1<br>7 |
| Rh<br>eu<br>ma<br>toi<br>d<br>Ar<br>thr<br>itis | C<br>00<br>03<br>87<br>3 | EF<br>HC<br>2  | 8<br>0<br>2<br>5<br>8 | Q5JS<br>T6 | EF-hand<br>domain<br>containing 2                          |                                             | 8       | 0<br>.<br>7<br>9<br>2 | 0<br>.<br>5<br>3<br>8 | 0.<br>9<br>9<br>1           | 0.<br>01 |  | 1 | 1 | 0 | 20<br>18 | 2<br>0<br>1<br>8 |
| Rh<br>eu<br>ma<br>toi<br>d<br>Ar<br>thr<br>itis | C<br>00<br>03<br>87<br>3 | FE<br>R1<br>L4 | 8<br>0<br>3<br>0<br>7 | A9Z1<br>Z3 | fer-1<br>like<br>family<br>member<br>4<br>(pseudo<br>gene) | Tr<br>ans<br>por<br>ter                     | 32      | 0<br>.<br>7<br>1<br>1 | 0<br>.<br>3<br>4<br>6 |                             | 0.<br>01 |  | 1 | 1 | 0 | 20<br>19 | 2<br>0<br>1<br>9 |
| Rh<br>eu<br>ma<br>toi<br>d<br>Ar<br>thr<br>itis | C<br>00<br>03<br>87<br>3 | PD<br>GF<br>D  | 8<br>0<br>3<br>1<br>0 | Q9GZ<br>P0 | platelet<br>derived<br>growth<br>factor D                  | Sig<br>nal<br>ing                           | 94      | 0<br>.<br>5<br>7<br>9 | 0<br>.<br>5<br>3<br>8 | 0.<br>0<br>1<br>7<br>1<br>5 | 0.<br>01 |  | 1 | 1 | 0 | 20<br>14 | 2<br>0<br>1<br>4 |
| Rh<br>eu<br>ma<br>toi<br>d<br>Ar<br>thr<br>itis | C<br>00<br>03<br>87<br>3 | TE<br>T1       | 8<br>0<br>3<br>1<br>2 | Q8NF<br>U7 | tet<br>methylcytosin<br>e dioxygenase<br>1                 |                                             | 15<br>6 | 0<br>.<br>5<br>2<br>3 | 0<br>.<br>8<br>0<br>8 | 1                           | 0.<br>01 |  | 1 | 1 | 0 | 20<br>03 | 2<br>0<br>0<br>3 |

|                      |          |         |       |                      |                                               |                         |     |       |       |          |      |  |   |   |   |      |      |
|----------------------|----------|---------|-------|----------------------|-----------------------------------------------|-------------------------|-----|-------|-------|----------|------|--|---|---|---|------|------|
| Rheumatoid Arthritis | C0003873 | PP1R2C  | 80316 | O14990               | PPP1R2C family member C                       | Enzyme modulator        | 231 | 0.478 | 0.846 |          | 0.01 |  | 1 | 1 | 0 | 2019 | 2019 |
| Rheumatoid Arthritis | C0003873 | CEP70   | 80321 | Q8NHQ1               | centrosomal protein 70                        |                         | 20  | 0.743 | 0.462 | 4.56E-15 | 0.01 |  | 1 | 1 | 0 | 2018 | 2018 |
| Rheumatoid Arthritis | C0003873 | CSR3    | 8048  | P50461               | cysteine and glycine rich protein 3           | Cellular structure      | 108 | 0.572 | 0.731 | 0.000159 | 0.01 |  | 1 | 1 | 0 | 2017 | 2017 |
| Rheumatoid Arthritis | C0003873 | CALM2   | 8005  | P0DP23;P0DP24;P0DP25 | calmodulin 2                                  | Calcium-binding protein | 252 | 0.472 | 0.808 | 0.00086  | 0.01 |  | 1 | 1 | 0 | 2020 | 2020 |
| Rheumatoid Arthritis | C0003873 | FOSL1   | 8061  | P15407               | FOS like 1, AP-1 transcription factor subunit | Transcription factor    | 150 | 0.519 | 0.846 | 0.00049  | 0.01 |  | 1 | 1 | 0 | 2019 | 2019 |
| Rheumatoid Arthritis | C0003873 | FGF23   | 8074  | Q9GZV9               | fibroblast growth factor 23                   | Signaling               | 305 | 0.461 | 0.731 | 0.00014  | 0.01 |  | 1 | 1 | 0 | 2020 | 2020 |
| Rheumatoid           | C0003    | COL18A1 | 8007  | P39060               | collagen type XVIII alpha 1 chain             |                         | 323 | 0.48  | 0.74E | 1.04E    | 0.01 |  | 1 | 1 | 1 | 2018 | 2018 |

|                                                 |                          |                     |                       |                                      |                                                                           |                                                            |         |                       |                       |                                  |          |  |   |   |   |                         |
|-------------------------------------------------|--------------------------|---------------------|-----------------------|--------------------------------------|---------------------------------------------------------------------------|------------------------------------------------------------|---------|-----------------------|-----------------------|----------------------------------|----------|--|---|---|---|-------------------------|
| d<br>Ar<br>thr<br>itis                          | 87<br>3                  |                     | 8<br>1                |                                      |                                                                           |                                                            | 4<br>9  | 0<br>8                | -<br>1<br>0           |                                  |          |  |   |   |   |                         |
| Rh<br>eu<br>ma<br>toi<br>d<br>Ar<br>thr<br>itis | C<br>00<br>03<br>87<br>3 | CA<br>LM<br>3       | 8<br>0<br>8           | P0DP<br>23;P0<br>DP24;<br>P0DP<br>25 | calmodu<br>lin 3                                                          | Ca<br>lci<br>um<br>-<br>bin<br>din<br>g<br>pro<br>tei<br>n | 21<br>5 | 0<br>.<br>4<br>8<br>5 | 0<br>.<br>8<br>4<br>6 | 0.<br>9<br>2<br>7<br>4<br>9      | 0.<br>01 |  | 1 | 1 | 0 | 20<br>20<br>2<br>0      |
| Rh<br>eu<br>ma<br>toi<br>d<br>Ar<br>thr<br>itis | C<br>00<br>03<br>87<br>3 | AP<br>OL<br>6       | 8<br>0<br>8<br>3<br>0 | Q9B<br>WW8                           | apolipop<br>rotein<br>L6                                                  | Tr<br>ans<br>por<br>ter                                    | 6       | 0<br>.<br>8<br>3<br>9 | 0<br>.<br>2<br>6<br>9 | 0.<br>0<br>9<br>0<br>2<br>9      | 0.<br>01 |  | 1 | 1 | 0 | 20<br>17<br>0<br>1<br>7 |
| Rh<br>eu<br>ma<br>toi<br>d<br>Ar<br>thr<br>itis | C<br>00<br>03<br>87<br>3 | AA<br>AS            | 8<br>0<br>8<br>6      | Q9NR<br>G9                           | aladin<br>repeat<br>nucleoporin                                           | WD                                                         | 92      | 0<br>.<br>6<br>0<br>1 | 0<br>.<br>6<br>5<br>4 | 2.<br>4<br>4<br>E<br>-<br>1<br>3 | 0.<br>01 |  | 1 | 1 | 0 | 20<br>16<br>0<br>1<br>6 |
| Rh<br>eu<br>ma<br>toi<br>d<br>Ar<br>thr<br>itis | C<br>00<br>03<br>87<br>3 | HM<br>GA<br>2       | 8<br>0<br>9<br>1      | P5292<br>6                           | high<br>mobility<br>group<br>AT-<br>hook 2                                | Nu<br>cle<br>ic<br>aci<br>d<br>bin<br>din<br>g             | 38<br>2 | 0<br>.<br>4<br>2<br>9 | 0<br>.<br>8<br>0<br>8 | 0.<br>8<br>7<br>0<br>1<br>5      | 0.<br>01 |  | 1 | 1 | 0 | 20<br>17<br>0<br>1<br>7 |
| Rh<br>eu<br>ma<br>toi<br>d<br>Ar<br>thr<br>itis | C<br>00<br>03<br>87<br>3 | SL<br>C3<br>8A<br>1 | 8<br>1<br>5<br>3<br>9 | Q9H2<br>H9                           | solute<br>carrier<br>family<br>38<br>member<br>1                          | Tr<br>ans<br>por<br>ter                                    | 64      | 0<br>.<br>6<br>1<br>5 | 0<br>.<br>7<br>6<br>9 | 0.<br>9<br>3<br>0<br>6<br>7      | 0.<br>01 |  | 1 | 1 | 0 | 20<br>12<br>0<br>1<br>2 |
| Rh<br>eu<br>ma<br>toi<br>d<br>Ar<br>thr<br>itis | C<br>00<br>03<br>87<br>3 | GD<br>PD<br>5       | 8<br>1<br>5<br>4<br>4 | Q8W<br>TR4                           | glycerophosph<br>odiester<br>phosphodiester<br>ase domain<br>containing 5 |                                                            | 18      | 0<br>.<br>7<br>6      | 0<br>.<br>3<br>0<br>8 | 0.<br>0<br>0<br>2<br>5           | 0.<br>01 |  | 1 | 1 | 0 | 20<br>07<br>0<br>0<br>7 |

|                      |          |          |       |        |                                                               |                    |       |       |         |       |  |   |   |   |      |      |
|----------------------|----------|----------|-------|--------|---------------------------------------------------------------|--------------------|-------|-------|---------|-------|--|---|---|---|------|------|
| Rheumatoid Arthritis | C0003873 | LBH      | 81606 | Q53QV2 | LBH regulator of WNT signaling pathway                        | 27                 | 0.686 | 0.5   | 0.01436 | 0.01  |  | 1 | 1 | 0 | 2016 | 2016 |
| Rheumatoid Arthritis | C0003873 | FIP1L1   | 81608 | Q6UN15 | factor interacting with PAPOLA and CPSF1                      | 111                | 0.575 | 0.57  | 0.789   | 0.01  |  | 1 | 1 | 0 | 2018 | 2018 |
| Rheumatoid Arthritis | C0003873 | MAP1LC3B | 81631 | Q9GZQ8 | microtubule associated protein 1 light chain 3 beta           | Cellular structure | 167   | 0.506 | 0.819   | 0.017 |  | 1 | 1 | 0 | 2019 | 2019 |
| Rheumatoid Arthritis | C0003873 | SLC14A2  | 8170  | Q15849 | solute carrier family 14 member 2                             | Transporter        | 71    | 0.606 | 0.9217  | 1.01  |  | 1 | 1 | 0 | 2018 | 2018 |
| Rheumatoid Arthritis | C0003873 | MIAA     | 8190  | Q16674 | MIA domain containing                                         | SH3                | 130   | 0.537 | 0.769   | 1.015 |  | 1 | 1 | 0 | 2007 | 2007 |
| Rheumatoid Arthritis | C0003873 | NCOA3    | 8202  | Q9Y6Q9 | nuclear receptor coactivator 3                                | Kinase             | 142   | 0.522 | 0.645   | 0.01  |  | 1 | 1 | 0 | 2003 | 2003 |
| Rheumatoid Ar        | C0003873 | COLQ     | 8292  | Q9Y215 | collagen like tail subunit of asymmetric acetylcholinesterase |                    | 92    | 0.628 | 0.654   | 7.01  |  | 1 | 1 | 0 | 2019 | 2019 |

|                                                 |                          |                      |                       |            |                                                          |                                             |         |                       |                       |                                  |          |  |   |   |   |          |                  |
|-------------------------------------------------|--------------------------|----------------------|-----------------------|------------|----------------------------------------------------------|---------------------------------------------|---------|-----------------------|-----------------------|----------------------------------|----------|--|---|---|---|----------|------------------|
| thr<br>itis                                     |                          |                      |                       |            |                                                          |                                             |         |                       |                       | 1<br>4                           |          |  |   |   |   |          |                  |
| Rh<br>eu<br>ma<br>toi<br>d<br>Ar<br>thr<br>itis | C<br>00<br>03<br>87<br>3 | EO<br>ME<br>S        | 8<br>3<br>2<br>0      | O959<br>36 | eomesod<br>ermin                                         | Tr<br>ans<br>cri<br>pti<br>on<br>fac<br>tor | 60      | 0<br>.<br>6<br>1<br>9 | 0<br>.<br>6<br>9<br>2 | 0.<br>9<br>8<br>4<br>4<br>3      | 0.<br>01 |  | 1 | 1 | 1 | 20<br>18 | 2<br>0<br>1<br>8 |
| Rh<br>eu<br>ma<br>toi<br>d<br>Ar<br>thr<br>itis | C<br>00<br>03<br>87<br>3 | AR<br>HG<br>AP<br>24 | 8<br>3<br>4<br>7<br>8 | Q8N2<br>64 | Rho GTPase<br>activating<br>protein 24                   |                                             | 27<br>3 | 0<br>.<br>4<br>5<br>6 | 0<br>.<br>8<br>0<br>8 | 3.<br>9<br>5<br>E<br>-<br>1<br>0 | 0.<br>01 |  | 1 | 1 | 0 | 20<br>17 | 2<br>0<br>1<br>7 |
| Rh<br>eu<br>ma<br>toi<br>d<br>Ar<br>thr<br>itis | C<br>00<br>03<br>87<br>3 | BC<br>L2<br>L12      | 8<br>3<br>5<br>9<br>6 | Q9HB<br>09 | BCL2 like 12                                             |                                             | 67      | 0<br>.<br>6<br>0<br>6 | 0<br>.<br>6<br>5<br>4 | 3.<br>8<br>3<br>E<br>-<br>0<br>9 | 0.<br>01 |  | 1 | 1 | 0 | 20<br>19 | 2<br>0<br>1<br>9 |
| Rh<br>eu<br>ma<br>toi<br>d<br>Ar<br>thr<br>itis | C<br>00<br>03<br>87<br>3 | FA<br>M1<br>67<br>A  | 8<br>3<br>6<br>4<br>8 | Q96K<br>S9 | family with<br>sequence<br>similarity 167<br>member A    |                                             | 31      | 0<br>.<br>6<br>7<br>8 | 0<br>.<br>6<br>9<br>2 | 1.<br>0<br>2<br>E<br>-<br>1<br>1 | 0.<br>01 |  | 1 | 1 | 0 | 20<br>11 | 2<br>0<br>1<br>1 |
| Rh<br>eu<br>ma<br>toi<br>d<br>Ar<br>thr<br>itis | C<br>00<br>03<br>87<br>3 | PA<br>RP<br>9        | 8<br>3<br>6<br>6<br>6 | Q8IX<br>Q6 | poly(ADP-<br>ribose)<br>polymerase<br>family<br>member 9 |                                             | 11<br>6 | 0<br>.<br>5<br>5<br>4 | 0<br>.<br>8<br>0<br>8 | 5<br>E<br>-<br>0<br>9            | 0.<br>01 |  | 1 | 1 | 0 | 20<br>19 | 2<br>0<br>1<br>9 |
| Rh<br>eu<br>ma<br>toi<br>d<br>Ar<br>thr<br>itis | C<br>00<br>03<br>87<br>3 | SE<br>SN<br>2        | 8<br>3<br>6<br>6<br>7 | P5800<br>4 | sestrin 2                                                | En<br>zy<br>me                              | 16<br>9 | 0<br>.<br>5<br>0<br>8 | 0<br>.<br>8<br>0<br>8 | 4.<br>1<br>9<br>E<br>-<br>0<br>7 | 0.<br>01 |  | 1 | 1 | 0 | 20<br>18 | 2<br>0<br>1<br>8 |
| Rh<br>eu<br>ma<br>toi                           | C<br>00<br>03            | ITC<br>H             | 8<br>3<br>7           | Q96J0<br>2 | itchy E3<br>ubiquiti<br>n protein<br>ligase              | En<br>zy<br>me                              | 12<br>3 | 0<br>.<br>5           | 0<br>.<br>7           | 0.<br>9<br>9<br>9                | 0.<br>01 |  | 1 | 1 | 0 | 20<br>08 | 2<br>0<br>0<br>8 |

|                                                 |                          |                      |                       |            |                                                                                     |                                             |         |                       |                            |                                  |          |  |   |   |   |          |                  |
|-------------------------------------------------|--------------------------|----------------------|-----------------------|------------|-------------------------------------------------------------------------------------|---------------------------------------------|---------|-----------------------|----------------------------|----------------------------------|----------|--|---|---|---|----------|------------------|
| d<br>Ar<br>thr<br>itis                          | 87<br>3                  |                      | 3<br>7                |            |                                                                                     |                                             |         | 5<br>6                | 6<br>9                     | 9<br>7                           |          |  |   |   |   |          |                  |
| Rh<br>eu<br>ma<br>toi<br>d<br>Ar<br>thr<br>itis | C<br>00<br>03<br>87<br>3 | PL<br>A2<br>G1<br>0  | 8<br>3<br>9<br>9      | O154<br>96 | phospho<br>lipase<br>A2<br>group X                                                  | En<br>zy<br>me                              | 86      | 0<br>.<br>5<br>8<br>1 | 0<br>.<br>6<br>9<br>2      | 0.<br>0<br>6<br>9<br>5<br>0<br>7 | 0.<br>01 |  | 1 | 1 | 0 | 20<br>11 | 2<br>0<br>1<br>1 |
| Rh<br>eu<br>ma<br>toi<br>d<br>Ar<br>thr<br>itis | C<br>00<br>03<br>87<br>3 | TM<br>PR<br>SS1<br>3 | 8<br>4<br>0<br>0<br>0 | Q9BY<br>E2 | transme<br>mbrane<br>serine<br>protease<br>13                                       | En<br>zy<br>me                              | 11<br>6 | 0<br>.<br>5<br>4<br>5 | 0<br>.<br>8<br>4<br>6      | 1.<br>4<br>8<br>E<br>-<br>0<br>8 | 0.<br>01 |  | 1 | 1 | 0 | 20<br>17 | 2<br>0<br>1<br>7 |
| Rh<br>eu<br>ma<br>toi<br>d<br>Ar<br>thr<br>itis | C<br>00<br>03<br>87<br>3 | ZN<br>F64<br>4       | 8<br>4<br>1<br>4<br>6 | Q9H5<br>82 | zinc<br>finger<br>protein<br>644                                                    | Tr<br>ans<br>cri<br>pti<br>on<br>fac<br>tor | 6       | 0<br>.<br>8<br>2<br>1 | 0<br>.<br>1<br>9<br>9<br>2 | 0.<br>9<br>9<br>1<br>4           | 0.<br>01 |  | 1 | 1 | 0 | 20<br>15 | 2<br>0<br>1<br>5 |
| Rh<br>eu<br>ma<br>toi<br>d<br>Ar<br>thr<br>itis | C<br>00<br>03<br>87<br>3 | RE<br>CK             | 8<br>4<br>3<br>4      | O959<br>80 | reversio<br>n<br>inducing<br>cysteine<br>rich<br>protein<br>with<br>kazal<br>motifs | En<br>zy<br>me<br>mo<br>dul<br>ato<br>r     | 12<br>3 | 0<br>.<br>5<br>4<br>7 | 0<br>.<br>7<br>3<br>1      | 1.<br>9<br>3<br>E<br>-<br>1<br>0 | 0.<br>01 |  | 1 | 1 | 0 | 20<br>05 | 2<br>0<br>0<br>5 |
| Rh<br>eu<br>ma<br>toi<br>d<br>Ar<br>thr<br>itis | C<br>00<br>03<br>87<br>3 | CA<br>VI<br>N2       | 8<br>4<br>3<br>6      | O958<br>10 | caveolae<br>associat<br>ed<br>protein 2                                             | Tr<br>ans<br>cri<br>pti<br>on<br>fac<br>tor | 61      | 0<br>.<br>6<br>1<br>7 | 0<br>.<br>6<br>1<br>5      | 7.<br>2<br>4<br>E<br>-<br>0<br>9 | 0.<br>01 |  | 1 | 1 | 0 | 20<br>12 | 2<br>0<br>1<br>2 |
| Rh<br>eu<br>ma<br>toi<br>d<br>Ar<br>thr<br>itis | C<br>00<br>03<br>87<br>3 | DO<br>T1<br>L        | 8<br>4<br>4<br>4      | Q8TE<br>K3 | DOT1<br>like<br>histone<br>lysine<br>methyltr<br>ansferase                          | Ep<br>ige<br>net<br>ic<br>reg<br>ula<br>tor | 79      | 0<br>.<br>5<br>9<br>9 | 0<br>.<br>6<br>9<br>2      | 1                                | 0.<br>01 |  | 1 | 1 | 0 | 20<br>18 | 2<br>0<br>1<br>8 |

|                      |          |          |       |        |                                                      |                            |     |       |          |          |      |  |   |   |   |      |      |
|----------------------|----------|----------|-------|--------|------------------------------------------------------|----------------------------|-----|-------|----------|----------|------|--|---|---|---|------|------|
| Rheumatoid Arthritis | C0003873 | MAP1LC3A | 84557 | Q9H492 | microtubule associated protein 1 light chain 3 alpha | Cellular structure         | 67  | 0.61  | 0.654    | 0.027922 | 0.01 |  | 1 | 1 | 0 | 2018 | 2018 |
| Rheumatoid Arthritis | C0003873 | CASR     | 8466  | P41180 | calcium sensing receptor                             | G-protein coupled receptor | 517 | 0.41  | 0.846698 | 0.046698 | 0.01 |  | 1 | 1 | 0 | 2017 | 2017 |
| Rheumatoid Arthritis | C0003873 | ZNF469   | 84627 | Q96JG9 | zinc finger protein 469                              |                            | 101 | 0.584 | 0.769    | 0.071866 | 0.01 |  | 1 | 1 | 0 | 2017 | 2017 |
| Rheumatoid Arthritis | C0003873 | GP65     | 8477  | Q8IYL9 | G protein-coupled receptor 65                        | G-protein coupled receptor | 47  | 0.653 | 0.114    | 0.0114   | 0.01 |  | 1 | 1 | 0 | 2017 | 2017 |
| Rheumatoid Arthritis | C0003873 | CILP     | 8483  | O75339 | cartilage intermediate layer protein                 |                            | 19  | 0.736 | 0.423    | 5.37E-26 | 0.01 |  | 1 | 1 | 0 | 2004 | 2004 |
| Rheumatoid Arthritis | C0003873 | MAP4K3   | 8491  | Q8IVH8 | mitogen-activated protein kinase kinase kinase 3     | Kinase                     | 29  | 0.711 | 0.423    | 0.010987 | 0.01 |  | 1 | 1 | 0 | 2013 | 2013 |

|                      |          |         |       |        |                                                                      |                      |     |       |       |          |      |  |   |   |   |      |      |
|----------------------|----------|---------|-------|--------|----------------------------------------------------------------------|----------------------|-----|-------|-------|----------|------|--|---|---|---|------|------|
| Rheumatoid Arthritis | C0003873 | PPM1D   | 8493  | O15297 | protein phosphatase, Mg <sup>2+</sup> /Mn <sup>2+</sup> dependent 1D | Enzyme               | 177 | 0.513 | 0.88  | 2.23E-11 | 0.01 |  | 1 | 1 | 0 | 2019 | 2019 |
| Rheumatoid Arthritis | C0003873 | TMEM60  | 85025 | Q9H2L4 | transmembrane protein 60                                             |                      | 10  | 0.821 | 0.115 | 0.7498   | 0.01 |  | 1 | 1 | 0 | 2018 | 2018 |
| Rheumatoid Arthritis | C0003873 | DNAJC14 | 85406 | Q6Y2X3 | DnaJ heat shock protein family (Hsp40) member C14                    |                      | 11  | 0.805 | 0.423 | 0.999    | 0.01 |  | 1 | 1 | 0 | 1999 | 1999 |
| Rheumatoid Arthritis | C0003873 | PIR     | 8544  | O00625 | pirin                                                                | Transcription factor | 26  | 0.716 | 0.385 | 5.34E-10 | 0.01 |  | 1 | 1 | 0 | 2012 | 2012 |
| Rheumatoid Arthritis | C0003873 | DKL3    | 85443 | Q9C098 | doublecortin like kinase 3                                           | Kinase               | 47  | 0.647 | 0.615 | 0.13686  | 0.01 |  | 0 | 1 | 0 | 2016 | 2016 |
| Rheumatoid Arthritis | C0003873 | KHSP    | 8570  | Q92945 | KH-type splicing regulatory protein                                  | Enzyme               | 148 | 0.526 | 0.846 | 1        | 0.01 |  | 1 | 1 | 0 | 1992 | 1992 |
| Rheumatoid Ar        | C0003873 | STC2    | 8614  | O76061 | stanniocalcin 2                                                      | Signaling            | 88  | 0.573 | 0.692 | 0.26588  | 0.01 |  | 1 | 1 | 0 | 2008 | 2008 |



|                                                 |                          |                     |                  |            |                                                         |                      |         |                       |                                      |                                  |          |  |   |   |   |          |                  |
|-------------------------------------------------|--------------------------|---------------------|------------------|------------|---------------------------------------------------------|----------------------|---------|-----------------------|--------------------------------------|----------------------------------|----------|--|---|---|---|----------|------------------|
| thr<br>itis                                     |                          |                     |                  |            |                                                         |                      |         |                       |                                      |                                  |          |  |   |   |   |          |                  |
| Rh<br>eu<br>ma<br>toi<br>d<br>Ar<br>thr<br>itis | C<br>00<br>03<br>87<br>3 | PS<br>MG<br>1       | 8<br>6<br>2<br>4 | O954<br>56 | proteasome<br>assembly<br>chaperone 1                   |                      | 97      | 0<br>.<br>5<br>7<br>9 | 0<br>.<br>7<br>3<br>1                | 0.<br>0<br>0<br>3<br>4<br>2      | 0.<br>01 |  | 1 | 1 | 0 | 20<br>18 | 2<br>0<br>1<br>8 |
| Rh<br>eu<br>ma<br>toi<br>d<br>Ar<br>thr<br>itis | C<br>00<br>03<br>87<br>3 | HS<br>D1<br>7B<br>6 | 8<br>6<br>3<br>0 | O147<br>56 | hydroxy<br>steroid<br>17-beta<br>dehydro<br>genase 6    | En<br>zy<br>me       | 82      | 0<br>.<br>5<br>9<br>2 | 0<br>.<br>6<br>9<br>2                | 0.<br>3<br>4<br>8<br>0<br>7      | 0.<br>01 |  | 0 | 1 | 0 | 20<br>19 | 2<br>0<br>1<br>9 |
| Rh<br>eu<br>ma<br>toi<br>d<br>Ar<br>thr<br>itis | C<br>00<br>03<br>87<br>3 | UN<br>C5<br>C       | 8<br>6<br>3<br>3 | O951<br>85 | unc-5<br>netrin<br>receptor<br>C                        | Re<br>ce<br>pto<br>r | 47      | 0<br>.<br>6<br>5      | 0<br>.<br>4<br>6<br>2                | 0.<br>0<br>0<br>8<br>8<br>1      | 0.<br>01 |  | 1 | 1 | 0 | 20<br>09 | 2<br>0<br>0<br>9 |
| Rh<br>eu<br>ma<br>toi<br>d<br>Ar<br>thr<br>itis | C<br>00<br>03<br>87<br>3 | NC<br>OA<br>1       | 8<br>6<br>4<br>8 | Q157<br>88 | nuclear<br>receptor<br>coactiva<br>tor 1                | Ki<br>nas<br>e       | 10<br>8 | 0<br>.<br>5<br>6<br>3 | 0<br>.<br>7<br>3<br>1                | 0.<br>9<br>9<br>9<br>8<br>1      | 0.<br>01 |  | 1 | 1 | 0 | 20<br>03 | 2<br>0<br>0<br>3 |
| Rh<br>eu<br>ma<br>toi<br>d<br>Ar<br>thr<br>itis | C<br>00<br>03<br>87<br>3 | NU<br>MB            | 8<br>6<br>5<br>0 | P4975<br>7 | NUMB<br>endocyti<br>c<br>adaptor<br>protein             | Sig<br>nal<br>ing    | 55      | 0<br>.<br>6<br>1<br>9 | 0<br>.<br>7<br>3<br>1                | 0.<br>0<br>0<br>3<br>9<br>9<br>6 | 0.<br>01 |  | 1 | 1 | 0 | 20<br>10 | 2<br>0<br>1<br>0 |
| Rh<br>eu<br>ma<br>toi<br>d<br>Ar<br>thr<br>itis | C<br>00<br>03<br>87<br>3 | MA<br>RC<br>O       | 8<br>6<br>8<br>5 | Q9UE<br>W3 | macrophage<br>receptor with<br>collagenous<br>structure |                      | 42      | 0<br>.<br>6<br>5<br>9 | 0<br>.<br>5<br>7<br>E<br>-<br>2<br>1 | 7.<br>7<br>7<br>E<br>-<br>2<br>1 | 0.<br>01 |  | 1 | 1 | 0 | 20<br>01 | 2<br>0<br>0<br>1 |
| Rh<br>eu<br>ma<br>toi                           | C<br>00<br>03            | HY<br>AL<br>2       | 8<br>6<br>9<br>2 | Q128<br>91 | hyaluron<br>idase 2                                     | En<br>zy<br>me       | 54      | 0<br>.<br>6           | 0<br>.<br>5                          | 0.<br>1<br>8<br>6                | 0.<br>01 |  | 1 | 1 | 0 | 20<br>04 | 2<br>0<br>0<br>4 |

|                                                 |                          |                      |                  |            |                                                                 |                                             |         |                       |                       |                                  |          |  |   |   |   |          |                  |
|-------------------------------------------------|--------------------------|----------------------|------------------|------------|-----------------------------------------------------------------|---------------------------------------------|---------|-----------------------|-----------------------|----------------------------------|----------|--|---|---|---|----------|------------------|
| d<br>Ar<br>thr<br>itis                          | 87<br>3                  |                      |                  |            |                                                                 |                                             |         | 4<br>4                | 7<br>7                | 8<br>2                           |          |  |   |   |   |          |                  |
| Rh<br>eu<br>ma<br>toi<br>d<br>Ar<br>thr<br>itis | C<br>00<br>03<br>87<br>3 | AC<br>TN<br>1        | 8<br>7           | P1281<br>4 | actinin alpha 1                                                 |                                             | 34      | 0<br>.<br>6<br>9<br>5 | 0<br>.<br>5<br>7<br>7 | 0.<br>9<br>9<br>9<br>7           | 0.<br>01 |  | 1 | 1 | 0 | 20<br>14 | 2<br>0<br>1<br>4 |
| Rh<br>eu<br>ma<br>toi<br>d<br>Ar<br>thr<br>itis | C<br>00<br>03<br>87<br>3 | UR<br>II             | 8<br>7<br>2<br>5 | O947<br>63 | URI1<br>prefoldi<br>n like<br>chaperone                         | Tr<br>ans<br>cri<br>pti<br>on<br>fac<br>tor | 53      | 0<br>.<br>6<br>3<br>3 | 0<br>.<br>6<br>5<br>4 | 1.<br>1<br>1<br>E<br>-<br>0<br>5 | 0.<br>01 |  | 1 | 1 | 0 | 20<br>14 | 2<br>0<br>1<br>4 |
| Rh<br>eu<br>ma<br>toi<br>d<br>Ar<br>thr<br>itis | C<br>00<br>03<br>87<br>3 | RIP<br>K1            | 8<br>7<br>3<br>7 | Q135<br>46 | receptor<br>interacti<br>ng<br>serine/th<br>reonine<br>kinase 1 | Ki<br>nas<br>e                              | 25<br>0 | 0<br>.<br>4<br>7<br>9 | 0<br>.<br>6<br>7<br>9 | 0.<br>0<br>7<br>9<br>4<br>4      | 0.<br>01 |  | 1 | 1 | 0 | 20<br>18 | 2<br>0<br>1<br>8 |
| Rh<br>eu<br>ma<br>toi<br>d<br>Ar<br>thr<br>itis | C<br>00<br>03<br>87<br>3 | TN<br>FS<br>F9       | 8<br>7<br>4<br>4 | P4127<br>3 | TNF<br>superfamily<br>member 9                                  |                                             | 90      | 0<br>.<br>5<br>7<br>9 | 0<br>.<br>6<br>9<br>2 | 0.<br>3<br>1<br>8<br>2<br>3      | 0.<br>01 |  | 1 | 1 | 0 | 20<br>04 | 2<br>0<br>0<br>4 |
| Rh<br>eu<br>ma<br>toi<br>d<br>Ar<br>thr<br>itis | C<br>00<br>03<br>87<br>3 | TN<br>FR<br>SF1<br>8 | 8<br>7<br>8<br>4 | Q9Y5<br>U5 | TNF receptor<br>superfamily<br>member 18                        |                                             | 53      | 0<br>.<br>6<br>3<br>1 | 0<br>.<br>5<br>3<br>8 | 1.<br>4<br>5<br>E<br>-<br>0<br>6 | 0.<br>01 |  | 1 | 1 | 0 | 20<br>08 | 2<br>0<br>0<br>8 |
| Rh<br>eu<br>ma<br>toi<br>d<br>Ar<br>thr<br>itis | C<br>00<br>03<br>87<br>3 | CR<br>EG<br>1        | 8<br>8<br>0<br>4 | O756<br>29 | cellular<br>repressor of<br>E1A<br>stimulated<br>genes 1        |                                             | 37      | 0<br>.<br>6<br>6<br>3 | 0<br>.<br>4<br>2<br>3 | 0.<br>0<br>1<br>2<br>2<br>3      | 0.<br>01 |  | 1 | 1 | 0 | 19<br>87 | 1<br>9<br>8<br>7 |

|                      |          |         |      |        |                                                |                  |     |       |       |          |      |  |   |   |   |      |      |
|----------------------|----------|---------|------|--------|------------------------------------------------|------------------|-----|-------|-------|----------|------|--|---|---|---|------|------|
| Rheumatoid Arthritis | C0003873 | HE SX1  | 8820 | Q9UBX0 | HESX homeobox 1                                |                  | 143 | 0.561 | 0.654 | 0.0797   | 0.01 |  | 1 | 1 | 0 | 1993 | 1993 |
| Rheumatoid Arthritis | C0003873 | SOCS2   | 8835 | O14508 | suppressor of cytokine signaling 2             | Enzyme modulator | 104 | 0.56  | 0.731 | 0.6299   | 0.01 |  | 1 | 1 | 0 | 2008 | 2008 |
| Rheumatoid Arthritis | C0003873 | CCN5    | 8839 | O76076 | cellular communication network factor 5        | Signaling        | 61  | 0.621 | 0.462 | 1.97E-05 | 0.01 |  | 1 | 1 | 0 | 2015 | 2015 |
| Rheumatoid Arthritis | C0003873 | CCN4    | 8840 | O95388 | cellular communication network factor 4        | Signaling        | 114 | 0.554 | 0.692 | 6.39E-07 | 0.01 |  | 1 | 1 | 5 | 2019 | 2019 |
| Rheumatoid Arthritis | C0003873 | PRDM1   | 8842 | O43490 | prominin 1                                     | Transporter      | 477 | 0.41  | 0.846 | 1.95E-22 | 0.01 |  | 1 | 1 | 0 | 2019 | 2019 |
| Rheumatoid Arthritis | C0003873 | CDK5R1  | 8851 | Q15078 | cyclin dependent kinase 5 regulatory subunit 1 | Enzyme modulator | 153 | 0.529 | 0.808 | 0.9149   | 0.01 |  | 1 | 1 | 0 | 2015 | 2015 |
| Rheumatoid Ar        | C0003873 | ALDH1A2 | 8854 | O94788 | aldehyde dehydrogenase 1 family                | Enzyme           | 109 | 0.578 | 0.692 | 0.331    | 0.01 |  | 1 | 1 | 0 | 2015 | 2015 |

|                      |          |         |      |        |                                          |                      |     |       |        |          |      |  |   |   |   |      |      |
|----------------------|----------|---------|------|--------|------------------------------------------|----------------------|-----|-------|--------|----------|------|--|---|---|---|------|------|
| thritis              |          |         |      |        | member A2                                |                      |     |       |        |          |      |  |   |   |   |      |      |
| Rheumatoid Arthritis | C0003873 | PER3    | 8863 | P56645 | period circadian regulator 3             | Transcription factor | 122 | 0.59  | 0.731  | 1.37E-17 | 0.01 |  | 1 | 1 | 0 | 2015 | 2015 |
| Rheumatoid Arthritis | C0003873 | IER3    | 8870 | P46695 | immediate early response 3               |                      | 78  | 0.53  | 0.7612 | 0.6322   | 0.01 |  | 1 | 1 | 0 | 2016 | 2016 |
| Rheumatoid Arthritis | C0003873 | ARHGEF7 | 8874 | Q14155 | Rho guanine nucleotide exchange factor 7 |                      | 215 | 0.486 | 0.846  | 0.995    | 0.01 |  | 1 | 1 | 1 | 2002 | 2002 |
| Rheumatoid Arthritis | C0003873 | KRIT1   | 889  | O00522 | KRIT1 ankyrin repeat containing          |                      | 201 | 0.5   | 0.808  | 0.0693   | 0.01 |  | 1 | 1 | 0 | 2020 | 2020 |
| Rheumatoid Arthritis | C0003873 | MTMR3   | 8897 | Q13615 | myotubularin related protein 3           | Enzyme               | 41  | 0.682 | 0.462  | 0.9937   | 0.01 |  | 1 | 1 | 1 | 2019 | 2019 |
| Rheumatoid Arthritis | C0003873 | CCNB1   | 891  | P14635 | cyclin B1                                | Enzyme modulator     | 155 | 0.512 | 0.7393 | 0.193    | 0.01 |  | 1 | 1 | 0 | 2012 | 2012 |
| Rheumatoid           | C0003    | KYNU    | 8942 | Q16719 | kynureninase                             | Enzyme               | 88  | 0.6   | 0.6    | 4.8E     | 0.01 |  | 1 | 1 | 0 | 2018 | 2018 |

|                                                 |                          |                            |                       |            |                                                                                        |                        |         |                       |                       |                                  |          |  |   |   |   |          |                  |
|-------------------------------------------------|--------------------------|----------------------------|-----------------------|------------|----------------------------------------------------------------------------------------|------------------------|---------|-----------------------|-----------------------|----------------------------------|----------|--|---|---|---|----------|------------------|
| d<br>Ar<br>thr<br>itis                          | 87<br>3                  |                            |                       |            |                                                                                        |                        |         | 1<br>7                | 9<br>2                | -<br>1<br>8                      |          |  |   |   |   |          |                  |
| Rh<br>eu<br>ma<br>toi<br>d<br>Ar<br>thr<br>itis | C<br>00<br>03<br>87<br>3 | LM<br>LN                   | 8<br>9<br>7<br>8<br>2 | Q96K<br>R4 | leishma<br>nolysin<br>like<br>peptidas<br>e                                            | En<br>zy<br>me         | 13<br>8 | 0<br>.<br>5<br>2<br>8 | 0<br>.<br>8<br>4<br>6 | 1.<br>8<br>7<br>E<br>-<br>1<br>4 | 0.<br>01 |  | 1 | 1 | 0 | 20<br>17 | 2<br>0<br>1<br>7 |
| Rh<br>eu<br>ma<br>toi<br>d<br>Ar<br>thr<br>itis | C<br>00<br>03<br>87<br>3 | RP<br>S6<br>KA<br>4        | 8<br>9<br>8<br>6      | O756<br>76 | ribosom<br>al<br>protein<br>S6<br>kinase<br>A4                                         | Ki<br>nas<br>e         | 17      | 0<br>.<br>7<br>4<br>3 | 0<br>.<br>2<br>6<br>9 | 0.<br>9<br>9<br>7<br>1<br>5      | 0.<br>01 |  | 1 | 1 | 0 | 20<br>14 | 2<br>0<br>1<br>4 |
| Rh<br>eu<br>ma<br>toi<br>d<br>Ar<br>thr<br>itis | C<br>00<br>03<br>87<br>3 | HS<br>PB<br>3              | 8<br>9<br>8<br>8      | Q129<br>88 | heat shock<br>protein family<br>B (small)<br>member 3                                  |                        | 32<br>7 | 0<br>.<br>4<br>8      | 0<br>.<br>7<br>6<br>9 | 6.<br>0<br>9<br>E<br>-<br>0<br>5 | 0.<br>01 |  | 1 | 1 | 0 | 20<br>11 | 2<br>0<br>1<br>1 |
| Rh<br>eu<br>ma<br>toi<br>d<br>Ar<br>thr<br>itis | C<br>00<br>03<br>87<br>3 | UC<br>N2                   | 9<br>0<br>2<br>2<br>6 | Q96R<br>P3 | urocortin 2                                                                            |                        | 56      | 0<br>.<br>6<br>3<br>3 | 0<br>.<br>5<br>7<br>7 | 0.<br>0<br>3<br>7<br>9<br>4<br>7 | 0.<br>01 |  | 1 | 1 | 0 | 20<br>11 | 2<br>0<br>1<br>1 |
| Rh<br>eu<br>ma<br>toi<br>d<br>Ar<br>thr<br>itis | C<br>00<br>03<br>87<br>3 | PK<br>D2<br>L1             | 9<br>0<br>3<br>3      | Q9P0<br>L9 | polycyst<br>in 2 like<br>1,<br>transient<br>receptor<br>potential<br>cation<br>channel | Ion<br>ch<br>an<br>nel | 12<br>4 | 0<br>.<br>5<br>6<br>5 | 0<br>.<br>7<br>3<br>1 | 1.<br>5<br>7<br>E<br>-<br>2<br>7 | 0.<br>01 |  | 1 | 1 | 0 | 20<br>18 | 2<br>0<br>1<br>8 |
| Rh<br>eu<br>ma<br>toi<br>d<br>Ar<br>thr<br>itis | C<br>00<br>03<br>87<br>3 | GA<br>DD<br>45<br>GIP<br>1 | 9<br>0<br>4<br>8<br>0 | Q8TA<br>E8 | GADD45G<br>interacting<br>protein 1                                                    |                        | 22      | 0<br>.<br>7<br>1<br>6 | 0<br>.<br>4<br>2<br>3 | 0.<br>0<br>0<br>0<br>1<br>0<br>3 | 0.<br>01 |  | 1 | 1 | 0 | 20<br>19 | 2<br>0<br>1<br>9 |

|                      |          |            |      |        |                                   |                      |     |       |       |          |      |  |   |   |   |      |      |
|----------------------|----------|------------|------|--------|-----------------------------------|----------------------|-----|-------|-------|----------|------|--|---|---|---|------|------|
| Rheumatoid Arthritis | C0003873 | CC T       | 907  |        | cataract, congenital, total       |                      | 75  | 0.588 | 0.769 |          | 0.01 |  | 1 | 1 | 0 | 2015 | 2015 |
| Rheumatoid Arthritis | C0003873 | CL DN 1    | 9076 | O95832 | claudin 1                         | Cell-cell junction   | 234 | 0.481 | 0.808 | 0.011    | 0.01 |  | 1 | 1 | 0 | 2018 | 2018 |
| Rheumatoid Arthritis | C0003873 | MT A1      | 9112 | Q13330 | metastasis associated 1           | Nucleic acid binding | 118 | 0.547 | 0.692 | 1        | 0.01 |  | 1 | 1 | 0 | 2016 | 2016 |
| Rheumatoid Arthritis | C0003873 | SL C1 6A 4 | 9122 | O15374 | solute carrier family 16 member 4 | Transporter          | 114 | 0.55  | 0.731 | 9.67E-08 | 0.01 |  | 1 | 1 | 0 | 2015 | 2015 |
| Rheumatoid Arthritis | C0003873 | SL C1 6A 3 | 9123 | O15427 | solute carrier family 16 member 3 | Transporter          | 122 | 0.542 | 0.701 | 0.0294   | 0.01 |  | 1 | 1 | 0 | 2015 | 2015 |
| Rheumatoid Arthritis | C0003873 | P2 RX 6    | 9127 | O15547 | purinergic receptor P2X 6         | Ion channel          | 85  | 0.599 | 0.769 | 4.47E-09 | 0.01 |  | 1 | 1 | 0 | 2010 | 2010 |
| Rheumatoid Ar        | C0003873 | SL C2 8A 2 | 9153 | O43868 | solute carrier family 28 member 2 | Transporter          | 12  | 0.78  | 0.385 | 1.13E-   | 0.01 |  | 0 | 1 | 0 | 2018 | 2018 |

|                                                 |                          |                |                       |            |                                                                            |                         |         |                       |                       |                                  |          |  |   |   |   |          |                  |
|-------------------------------------------------|--------------------------|----------------|-----------------------|------------|----------------------------------------------------------------------------|-------------------------|---------|-----------------------|-----------------------|----------------------------------|----------|--|---|---|---|----------|------------------|
| thr<br>itis                                     |                          |                |                       |            |                                                                            |                         |         |                       |                       | 2<br>7                           |          |  |   |   |   |          |                  |
| Rh<br>eu<br>ma<br>toi<br>d<br>Ar<br>thr<br>itis | C<br>00<br>03<br>87<br>3 | EB<br>AG<br>9  | 9<br>1<br>6<br>6      | O005<br>59 | estrogen<br>receptor<br>binding site<br>associated<br>antigen 9            |                         | 69      | 0<br>.<br>6<br>1<br>5 | 0<br>.<br>4<br>6<br>2 | 0.<br>0<br>7<br>7<br>1<br>0<br>1 | 0.<br>01 |  | 1 | 1 | 0 | 20<br>08 | 2<br>0<br>0<br>8 |
| Rh<br>eu<br>ma<br>toi<br>d<br>Ar<br>thr<br>itis | C<br>00<br>03<br>87<br>3 | MF<br>SD<br>4B | 9<br>1<br>7<br>4<br>9 | Q5TF<br>39 | major<br>facilitato<br>r<br>superfa<br>mily<br>domain<br>containi<br>ng 4B | Tr<br>ans<br>por<br>ter | 13      | 0<br>.<br>8<br>0<br>5 | 0<br>.<br>2<br>6<br>9 | 8.<br>3<br>E<br>-<br>0<br>6      | 0.<br>01 |  | 1 | 1 | 0 | 20<br>14 | 2<br>0<br>1<br>4 |
| Rh<br>eu<br>ma<br>toi<br>d<br>Ar<br>thr<br>itis | C<br>00<br>03<br>87<br>3 | OS<br>MR       | 9<br>1<br>8<br>0      | Q996<br>50 | oncostat<br>in M<br>receptor                                               | Sig<br>nal<br>ing       | 77      | 0<br>.<br>5<br>9<br>9 | 0<br>.<br>5<br>7<br>7 | 9.<br>2<br>1<br>E<br>-<br>1<br>8 | 0.<br>01 |  | 1 | 1 | 0 | 20<br>14 | 2<br>0<br>1<br>4 |
| Rh<br>eu<br>ma<br>toi<br>d<br>Ar<br>thr<br>itis | C<br>00<br>03<br>87<br>3 | DE<br>DD       | 9<br>1<br>9<br>1      | O756<br>18 | death effector<br>domain<br>containing                                     |                         | 24      | 0<br>.<br>7<br>1<br>1 | 0<br>.<br>3<br>4<br>6 | 0.<br>9<br>5<br>9<br>1<br>2      | 0.<br>01 |  | 1 | 1 | 0 | 20<br>10 | 2<br>0<br>1<br>0 |
| Rh<br>eu<br>ma<br>toi<br>d<br>Ar<br>thr<br>itis | C<br>00<br>03<br>87<br>3 | CD<br>4        | 9<br>2<br>0           | P0173<br>0 | CD4 molecule                                                               |                         | 73      | 0<br>.<br>6<br>0<br>4 | 0<br>.<br>6<br>5<br>4 | 0.<br>0<br>0<br>7<br>8<br>9      | 0.<br>01 |  | 1 | 1 | 0 | 20<br>08 | 2<br>0<br>0<br>8 |
| Rh<br>eu<br>ma<br>toi<br>d<br>Ar<br>thr<br>itis | C<br>00<br>03<br>87<br>3 | MT<br>DH       | 9<br>2<br>1<br>4<br>0 | Q86U<br>E4 | metadherin                                                                 |                         | 20<br>0 | 0<br>.<br>4<br>9<br>1 | 0<br>.<br>7<br>6<br>9 | 0.<br>3<br>2<br>9<br>2<br>4      | 0.<br>01 |  | 1 | 1 | 0 | 20<br>17 | 2<br>0<br>1<br>7 |
| Rh<br>eu<br>ma<br>toi                           | C<br>00<br>03            | LR<br>AT       | 9<br>2<br>2<br>7      | O952<br>37 | lecithin retinol<br>acyltransferas<br>e                                    |                         | 84      | 0<br>.<br>6           | 0<br>.<br>6           | 0.<br>0<br>2<br>8                | 0.<br>01 |  | 1 | 1 | 0 | 20<br>09 | 2<br>0<br>0<br>9 |

|                                                 |                          |                     |                       |            |                                                                                                        |                                       |             |                       |                             |                                  |          |   |   |   |          |                  |                  |
|-------------------------------------------------|--------------------------|---------------------|-----------------------|------------|--------------------------------------------------------------------------------------------------------|---------------------------------------|-------------|-----------------------|-----------------------------|----------------------------------|----------|---|---|---|----------|------------------|------------------|
| d<br>Ar<br>thr<br>itis                          | 87<br>3                  |                     |                       |            |                                                                                                        |                                       | 0<br>8      | 5<br>4                | 3<br>5<br>4                 |                                  |          |   |   |   |          |                  |                  |
| Rh<br>eu<br>ma<br>toi<br>d<br>Ar<br>thr<br>itis | C<br>00<br>03<br>87<br>3 | NA<br>F1            | 9<br>2<br>3<br>4<br>5 | Q96H<br>R8 | nuclear<br>assembly<br>factor 1<br>ribonucleoprot<br>ein                                               | 27                                    | 0<br>.<br>7 | 0<br>.<br>5           | 0.<br>9<br>7<br>7<br>9<br>3 | 0.<br>01                         |          | 1 | 1 | 0 | 20<br>03 | 2<br>0<br>0<br>3 |                  |
| Rh<br>eu<br>ma<br>toi<br>d<br>Ar<br>thr<br>itis | C<br>00<br>03<br>87<br>3 | RP<br>S6<br>KA<br>5 | 9<br>2<br>5<br>2      | O755<br>82 | ribosom<br>al<br>protein<br>S6<br>kinase<br>A5                                                         | Ki<br>nas<br>e                        | 28          | 0<br>.<br>7<br>2<br>2 | 0<br>.<br>5<br>7<br>7       | 0.<br>9<br>9<br>9<br>0<br>9      | 0.<br>01 |   | 1 | 1 | 0        | 20<br>14         | 2<br>0<br>1<br>4 |
| Rh<br>eu<br>ma<br>toi<br>d<br>Ar<br>thr<br>itis | C<br>00<br>03<br>87<br>3 | AI<br>MP<br>1       | 9<br>2<br>5<br>5      | Q129<br>04 | aminoac<br>yl tRNA<br>syntheta<br>se<br>complex<br>interacti<br>ng<br>multifun<br>ctional<br>protein 1 | En<br>zy<br>me                        | 12<br>5     | 0<br>.<br>5<br>6<br>6 | 0<br>.<br>7<br>6<br>9       | 3.<br>0<br>4<br>E<br>-<br>0<br>7 | 0.<br>01 |   | 1 | 1 | 0        | 20<br>02         | 2<br>0<br>0<br>2 |
| Rh<br>eu<br>ma<br>toi<br>d<br>Ar<br>thr<br>itis | C<br>00<br>03<br>87<br>3 | PD<br>LI<br>M7      | 9<br>2<br>6<br>0      | Q9NR<br>12 | PDZ and<br>LIM<br>domain<br>7                                                                          | Ce<br>llul<br>ar<br>str<br>uct<br>ure | 24<br>1     | 0<br>.<br>4<br>7<br>4 | 0<br>.<br>8<br>0<br>8       | 0.<br>7<br>0<br>8<br>3<br>8      | 0.<br>01 |   | 1 | 1 | 0        | 20<br>13         | 2<br>0<br>1<br>3 |
| Rh<br>eu<br>ma<br>toi<br>d<br>Ar<br>thr<br>itis | C<br>00<br>03<br>87<br>3 | PI<br>WI<br>L1      | 9<br>2<br>7<br>1      | Q96J9<br>4 | piwi like<br>RNA-<br>mediated gene<br>silencing 1                                                      |                                       | 99          | 0<br>.<br>5<br>7      | 0<br>.<br>7<br>3<br>1       | 7.<br>2<br>8<br>E<br>-<br>1<br>4 | 0.<br>01 |   | 1 | 1 | 0        | 20<br>16         | 2<br>0<br>1<br>6 |
| Rh<br>eu<br>ma<br>toi<br>d<br>Ar<br>thr<br>itis | C<br>00<br>03<br>87<br>3 | CD<br>9             | 9<br>2<br>8           | P2192<br>6 | CD9 molecule                                                                                           |                                       | 15<br>6     | 0<br>.<br>5<br>2<br>8 | 0<br>.<br>7<br>6<br>9       | 0.<br>0<br>4<br>7<br>2<br>2      | 0.<br>01 |   | 1 | 1 | 0        | 19<br>89         | 1<br>9<br>8<br>9 |



|                      |          |        |      |        |                                             |                            |     |       |       |          |      |  |   |   |   |      |      |
|----------------------|----------|--------|------|--------|---------------------------------------------|----------------------------|-----|-------|-------|----------|------|--|---|---|---|------|------|
| Rheumatoid Arthritis | C0003873 | ADGRG1 | 9289 | Q9Y653 | adhesion G protein-coupled receptor G1      | G-protein coupled receptor | 106 | 0.59  | 0.54  | 5.35E-10 | 0.01 |  | 1 | 1 | 0 | 2018 | 2018 |
| Rheumatoid Arthritis | C0003873 | S1PR2  | 9294 | O95136 | sphingosine-1-phosphate receptor 2          | G-protein coupled receptor | 93  | 0.585 | 0.731 | 0.008286 | 0.01 |  | 1 | 1 | 0 | 2008 | 2008 |
| Rheumatoid Arthritis | C0003873 | SRSF1  | 9295 | Q05519 | serine and arginine rich splicing factor 11 | Nucleic acid binding       | 11  | 0.821 | 0.269 | 0.009806 | 0.01 |  | 1 | 1 | 0 | 2017 | 2017 |
| Rheumatoid Arthritis | C0003873 | MP20   | 9313 | O60882 | matrix metalloproteinase 20                 | Enzyme                     | 40  | 0.663 | 0.538 | 6.08E-14 | 0.01 |  | 1 | 1 | 0 | 1999 | 1999 |
| Rheumatoid Arthritis | C0003873 | PPIG   | 9360 | Q13427 | peptidylprolyl isomerase G                  |                            | 203 | 0.497 | 0.846 | 0.00922  | 0.01 |  | 1 | 1 | 0 | 2017 | 2017 |
| Rheumatoid Arthritis | C0003873 | LONP1  | 9361 | P36776 | lon peptidase 1, mitochondrial              | Enzyme                     | 197 | 0.517 | 0.808 | 0.00993  | 0.01 |  | 1 | 1 | 0 | 2019 | 2019 |

|                      |          |        |       |        |                                               |          |     |       |       |         |      |  |   |   |   |      |      |
|----------------------|----------|--------|-------|--------|-----------------------------------------------|----------|-----|-------|-------|---------|------|--|---|---|---|------|------|
| Rheumatoid Arthritis | C0003873 | ZFYVE9 | 9372  | O95405 | zinc finger FYVE-type containing 9            |          | 59  | 0.647 | 0.615 | 0.9244  | 0.01 |  | 1 | 1 | 0 | 2007 | 2007 |
| Rheumatoid Arthritis | C0003873 | COX5A  | 9377  | P20674 | cytochrome c oxidase subunit 5A               | Enzyme   | 171 | 0.515 | 0.846 | 0.4407  | 0.01 |  | 1 | 1 | 0 | 2000 | 2000 |
| Rheumatoid Arthritis | C0003873 | CIAO1  | 9391  | O76071 | cytosolic iron-sulfur assembly component 1    |          | 3   | 0.931 | 0.154 | 0.01245 | 0.01 |  | 1 | 1 | 0 | 1998 | 1998 |
| Rheumatoid Arthritis | C0003873 | CLEC6A | 93978 | Q6EIG7 | C-type lectin domain containing 6A            | Receptor | 35  | 0.666 | 0.423 | 1.3E-06 | 0.01 |  | 1 | 1 | 2 | 2013 | 2013 |
| Rheumatoid Arthritis | C0003873 | ORMDL3 | 94103 | Q8N138 | ORMDL sphingolipid biosynthesis regulator 3   |          | 35  | 0.666 | 0.423 | 0.7839  | 0.01 |  | 1 | 1 | 0 | 2012 | 2012 |
| Rheumatoid Arthritis | C0003873 | CYP7B1 | 9420  | O75881 | cytochrome P450 family 7 subfamily B member 1 | Enzyme   | 141 | 0.563 | 0.692 | 3.3E-06 | 0.01 |  | 1 | 1 | 0 | 2005 | 2005 |
| Rheumatoid Ar        | C0003873 | AIM2   | 9447  | O14862 | absent in melanoma 2                          |          | 167 | 0.521 | 0.769 | 2.19E-  | 0.01 |  | 1 | 1 | 0 | 2019 | 2019 |

|                                                 |                          |                      |                  |            |                                                      |                         |         |                       |                       |                                  |          |  |   |   |   |          |                  |
|-------------------------------------------------|--------------------------|----------------------|------------------|------------|------------------------------------------------------|-------------------------|---------|-----------------------|-----------------------|----------------------------------|----------|--|---|---|---|----------|------------------|
| thr<br>itis                                     |                          |                      |                  |            |                                                      |                         |         |                       |                       | 0<br>9                           |          |  |   |   |   |          |                  |
| Rh<br>eu<br>ma<br>toi<br>d<br>Ar<br>thr<br>itis | C<br>00<br>03<br>87<br>3 | IL2<br>7R<br>A       | 9<br>4<br>6<br>6 | Q6U<br>WB1 | interleuk<br>in 27<br>receptor<br>subunit<br>alpha   | Sig<br>nal<br>ing       | 40      | 0<br>.<br>6<br>5<br>9 | 0<br>.<br>7<br>3<br>1 | 3.<br>9<br>E<br>-<br>1<br>2      | 0.<br>01 |  | 1 | 1 | 0 | 20<br>10 | 2<br>0<br>1<br>0 |
| Rh<br>eu<br>ma<br>toi<br>d<br>Ar<br>thr<br>itis | C<br>00<br>03<br>87<br>3 | CH<br>ST<br>3        | 9<br>4<br>6<br>9 | Q7LG<br>C8 | carbohydrate<br>sulfotransferas<br>e 3               |                         | 21<br>4 | 0<br>.<br>5<br>1<br>7 | 0<br>.<br>8<br>4<br>6 | 0.<br>0<br>0<br>7<br>2<br>4<br>3 | 0.<br>01 |  | 0 | 1 | 0 | 20<br>13 | 2<br>0<br>1<br>3 |
| Rh<br>eu<br>ma<br>toi<br>d<br>Ar<br>thr<br>itis | C<br>00<br>03<br>87<br>3 | CD<br>36             | 9<br>4<br>8      | P1667<br>1 | CD36<br>molecul<br>e                                 | Re<br>ce<br>pto<br>r    | 35<br>1 | 0<br>.<br>4<br>4<br>6 | 0<br>.<br>8<br>4<br>6 | 1.<br>0<br>9<br>E<br>-<br>6<br>0 | 0.<br>01 |  | 1 | 1 | 0 | 20<br>13 | 2<br>0<br>1<br>3 |
| Rh<br>eu<br>ma<br>toi<br>d<br>Ar<br>thr<br>itis | C<br>00<br>03<br>87<br>3 | AT<br>P6<br>V1<br>G1 | 9<br>5<br>5<br>0 | O753<br>48 | ATPase<br>H+<br>transport<br>ing V1<br>subunit<br>G1 | Tr<br>ans<br>por<br>ter | 2       | 0<br>.<br>9<br>3<br>1 | 0<br>.<br>1<br>5<br>4 | 0.<br>1<br>0<br>4<br>0<br>7      | 0.<br>01 |  | 1 | 1 | 0 | 20<br>01 | 2<br>0<br>0<br>1 |
| Rh<br>eu<br>ma<br>toi<br>d<br>Ar<br>thr<br>itis | C<br>00<br>03<br>87<br>3 | GT<br>F2I<br>RD<br>1 | 9<br>5<br>6<br>9 | Q9U<br>HL9 | GTF2I repeat<br>domain<br>containing 1               |                         | 22<br>2 | 0<br>.<br>5<br>2<br>2 | 0<br>.<br>7<br>6<br>9 | 0.<br>9<br>0<br>0<br>3<br>9      | 0.<br>01 |  | 1 | 1 | 0 | 20<br>19 | 2<br>0<br>1<br>9 |
| Rh<br>eu<br>ma<br>toi<br>d<br>Ar<br>thr<br>itis | C<br>00<br>03<br>87<br>3 | PR<br>DX<br>6        | 9<br>5<br>8<br>8 | P3004<br>1 | peroxire<br>doxin 6                                  | En<br>zy<br>me          | 93      | 0<br>.<br>5<br>7<br>2 | 0<br>.<br>7<br>3<br>1 | 4.<br>8<br>2<br>E<br>-<br>0<br>5 | 0.<br>01 |  | 1 | 1 | 0 | 20<br>15 | 2<br>0<br>1<br>5 |
| Rh<br>eu<br>ma<br>toi                           | C<br>00<br>03            | AK<br>AP<br>12       | 9<br>5<br>9<br>0 | Q029<br>52 | A-kinase<br>anchoring<br>protein 12                  |                         | 99      | 0<br>.<br>5           | 0<br>.<br>6           | 0.<br>0<br>3<br>5                | 0.<br>01 |  | 1 | 1 | 0 | 20<br>17 | 2<br>0<br>1<br>7 |

|                                                 |                          |                 |                       |            |                                           |                                                |         |                       |                       |                             |          |  |   |   |   |          |                  |
|-------------------------------------------------|--------------------------|-----------------|-----------------------|------------|-------------------------------------------|------------------------------------------------|---------|-----------------------|-----------------------|-----------------------------|----------|--|---|---|---|----------|------------------|
| d<br>Ar<br>thr<br>itis                          | 87<br>3                  |                 |                       |            |                                           |                                                |         | 6<br>6                | 1<br>5                | 6<br>6<br>6                 |          |  |   |   |   |          |                  |
| Rh<br>eu<br>ma<br>toi<br>d<br>Ar<br>thr<br>itis | C<br>00<br>03<br>87<br>3 | CD<br>47        | 9<br>6<br>1           | Q087<br>22 | CD47<br>molecule                          |                                                | 25<br>3 | 0<br>.<br>4<br>6<br>8 | 0<br>.<br>7<br>6<br>9 | 0.<br>9<br>1<br>9<br>2<br>4 | 0.<br>01 |  | 1 | 1 | 0 | 20<br>17 | 2<br>0<br>1<br>7 |
| Rh<br>eu<br>ma<br>toi<br>d<br>Ar<br>thr<br>itis | C<br>00<br>03<br>87<br>3 | NC<br>OR<br>1   | 9<br>6<br>1<br>1      | O753<br>76 | nuclear<br>receptor<br>corepres<br>sor 1  | Tr<br>ans<br>cri<br>pti<br>on<br>fac<br>tor    | 94      | 0<br>.<br>5<br>9<br>7 | 0<br>.<br>7<br>3<br>1 | 1                           | 0.<br>01 |  | 1 | 1 | 0 | 20<br>18 | 2<br>0<br>1<br>8 |
| Rh<br>eu<br>ma<br>toi<br>d<br>Ar<br>thr<br>itis | C<br>00<br>03<br>87<br>3 | ISG<br>15       | 9<br>6<br>3<br>6      | P0516<br>1 | ISG15<br>ubiquiti<br>n like<br>modifier   | Nu<br>cle<br>ic<br>aci<br>d<br>bin<br>din<br>g | 14<br>8 | 0<br>.<br>5<br>3<br>1 | 0<br>.<br>8<br>0<br>8 | 0.<br>4<br>0<br>5<br>2<br>7 | 0.<br>01 |  | 1 | 1 | 0 | 20<br>16 | 2<br>0<br>1<br>6 |
| Rh<br>eu<br>ma<br>toi<br>d<br>Ar<br>thr<br>itis | C<br>00<br>03<br>87<br>3 | CD<br>58        | 9<br>6<br>5           | P1925<br>6 | CD58<br>molecule                          |                                                | 80      | 0<br>.<br>5<br>8<br>4 | 0<br>.<br>7<br>6<br>9 | 0.<br>2<br>5<br>0<br>9<br>2 | 0.<br>01 |  | 1 | 1 | 0 | 19<br>96 | 1<br>9<br>9<br>6 |
| Rh<br>eu<br>ma<br>toi<br>d<br>Ar<br>thr<br>itis | C<br>00<br>03<br>87<br>3 | CD<br>59        | 9<br>6<br>6           | P1398<br>7 | CD59<br>molecule<br>(CD59 blood<br>group) |                                                | 26<br>2 | 0<br>.<br>4<br>6<br>9 | 0<br>.<br>8<br>0<br>8 | 0.<br>6<br>0<br>5<br>6<br>8 | 0.<br>01 |  | 1 | 1 | 0 | 20<br>06 | 2<br>0<br>0<br>6 |
| Rh<br>eu<br>ma<br>toi<br>d<br>Ar<br>thr<br>itis | C<br>00<br>03<br>87<br>3 | BM<br>S1P<br>20 | 9<br>6<br>6<br>1<br>0 |            | BMS1<br>pseudogene 20                     |                                                | 28      | 0<br>.<br>6<br>8<br>2 | 0<br>.<br>5<br>7<br>7 |                             | 0.<br>01 |  | 1 | 1 | 0 | 19<br>98 | 1<br>9<br>9<br>8 |
| Rh<br>eu                                        | C<br>00                  | LPI<br>N2       | 9<br>6                | Q925<br>39 | lipin 2                                   |                                                | 81      | 0<br>.                | 0<br>.                | 5.<br>0                     | 0.<br>01 |  | 1 | 1 | 0 | 20<br>17 | 2<br>0           |

|                      |          |        |      |        |                                               |                      |     |       |       |          |      |  |   |   |   |      |      |
|----------------------|----------|--------|------|--------|-----------------------------------------------|----------------------|-----|-------|-------|----------|------|--|---|---|---|------|------|
| matoid Arthritis     | 03873    |        | 63   |        |                                               |                      |     | 628   | 615   | 3E-05    |      |  |   |   |   |      | 17   |
| Rheumatoid Arthritis | C0003873 | MA RF1 | 9665 | Q9Y4F3 | meiosis regulator and mRNA stability factor 1 | Nucleic acid binding | 4   | 0.931 | 0.154 | 1        | 0.01 |  | 1 | 1 | 0 | 2018 | 2018 |
| Rheumatoid Arthritis | C0003873 | CD63   | 967  | P08962 | CD63 molecule                                 |                      | 128 | 0.542 | 0.731 | 0.017439 | 0.01 |  | 1 | 1 | 0 | 2007 | 2007 |
| Rheumatoid Arthritis | C0003873 | RIMS2  | 9699 | Q9UQ26 | regulating synaptic membrane exocytosis 2     | Enzyme modulator     | 16  | 0.769 | 0.423 | 1        | 0.01 |  | 0 | 1 | 0 | 1997 | 1997 |
| Rheumatoid Arthritis | C0003873 | CD74   | 972  | P04233 | CD74 molecule                                 | Enzyme modulator     | 170 | 0.512 | 0.889 | 0.2889   | 0.01 |  | 1 | 1 | 0 | 2020 | 2020 |
| Rheumatoid Arthritis | C0003873 | CD79A  | 973  | P11912 | CD79a molecule                                | Receptor             | 134 | 0.536 | 0.731 | 0.69226  | 0.01 |  | 1 | 1 | 0 | 2017 | 2017 |
| Rheumatoid Arthritis | C0003873 | HDAC4  | 9759 | P56524 | histone deacetylase 4                         | Epigenetic regulator | 256 | 0.484 | 0.885 | 1        | 0.01 |  | 1 | 1 | 0 | 2019 | 2019 |

|                      |          |          |      |        |                                                      |                  |     |       |       |          |      |  |   |   |   |      |      |
|----------------------|----------|----------|------|--------|------------------------------------------------------|------------------|-----|-------|-------|----------|------|--|---|---|---|------|------|
| Rheumatoid Arthritis | C0003873 | PCLA F   | 9768 | Q15004 | PCNA clamp associated factor                         |                  | 125 | 0.538 | 0.769 | 0.16276  | 0.01 |  | 1 | 1 | 0 | 2017 | 2017 |
| Rheumatoid Arthritis | C0003873 | CD A     | 978  | P32320 | cytidine deaminase                                   | Enzyme           | 103 | 0.558 | 0.731 | 0.08104  | 0.01 |  | 1 | 1 | 0 | 2018 | 2018 |
| Rheumatoid Arthritis | C0003873 | GI T2    | 9815 | Q14161 | GIT ArfGAP 2                                         |                  | 26  | 0.716 | 0.385 | 0.9793   | 0.01 |  | 1 | 1 | 0 | 2018 | 2018 |
| Rheumatoid Arthritis | C0003873 | CD K1    | 983  | P06493 | cyclin dependent kinase 1                            | Kinase           | 214 | 0.482 | 0.808 | 0.9206   | 0.01 |  | 1 | 1 | 0 | 1999 | 1999 |
| Rheumatoid Arthritis | C0003873 | TE SP A1 | 9840 | A2RU30 | thymocyte expressed, positive selection associated 1 |                  | 5   | 0.839 | 0.154 | 4.69E-06 | 0.01 |  | 1 | 1 | 1 | 2015 | 2015 |
| Rheumatoid Arthritis | C0003873 | GA B2    | 9846 | Q9UQC2 | GRB2 associated binding protein 2                    | Receptor         | 110 | 0.563 | 0.692 | 0.9325   | 0.01 |  | 1 | 1 | 0 | 2005 | 2005 |
| Rheumatoid Ar        | C0003873 | NR I13   | 9970 | Q14994 | nuclear receptor subfamily 1 group I                 | Nuclear receptor | 318 | 0.448 | 0.846 | 3.53E-01 | 0.01 |  | 1 | 1 | 0 | 2001 | 2001 |

|                                                 |                          |                     |                  |            |                                                          |    |                       |                       |                                  |          |  |   |   |   |          |                  |
|-------------------------------------------------|--------------------------|---------------------|------------------|------------|----------------------------------------------------------|----|-----------------------|-----------------------|----------------------------------|----------|--|---|---|---|----------|------------------|
| thr<br>itis                                     |                          |                     |                  |            | member<br>3                                              |    |                       |                       | 0<br>8                           |          |  |   |   |   |          |                  |
| Rh<br>eu<br>ma<br>toi<br>d<br>Ar<br>thr<br>itis | C<br>00<br>03<br>87<br>3 | HN<br>RN<br>PD<br>L | 9<br>9<br>8<br>7 | O149<br>79 | heterogeneous<br>nuclear<br>ribonucleoprot<br>ein D like | 82 | 0<br>.<br>5<br>9<br>7 | 0<br>.<br>6<br>5<br>4 | 0.<br>0<br>7<br>7<br>9<br>5<br>4 | 0.<br>01 |  | 1 | 1 | 0 | 19<br>96 | 1<br>9<br>9<br>6 |

**Table S4. GeneCards predicted disease targets for rheumatoid arthritis**

| Gene Symbol | Description                                              | Catego<br>ry   | Gi<br>fts | GC Id       | Rele<br>vanc<br>e<br>score | GeneCards Link                                                                                                                        |
|-------------|----------------------------------------------------------|----------------|-----------|-------------|----------------------------|---------------------------------------------------------------------------------------------------------------------------------------|
| PTPN22      | Protein Tyrosine Phosphatase Non-Receptor Type 22        | Protein Coding | 47        | GC01M113813 | 101.3037                   | <a href="https://www.genecards.org/cgi-bin/carddisp.pl?gene=PTPN22">https://www.genecards.org/cgi-bin/carddisp.pl?gene=PTPN22</a>     |
| IL6         | Interleukin 6                                            | Protein Coding | 47        | GC07P022725 | 92.88411                   | <a href="https://www.genecards.org/cgi-bin/carddisp.pl?gene=IL6">https://www.genecards.org/cgi-bin/carddisp.pl?gene=IL6</a>           |
| HLA-DRB1    | Major Histocompatibility Complex, Class II, DR Beta 1    | Protein Coding | 46        | GC06M066007 | 92.80508                   | <a href="https://www.genecards.org/cgi-bin/carddisp.pl?gene=HLA-DRB1">https://www.genecards.org/cgi-bin/carddisp.pl?gene=HLA-DRB1</a> |
| IL10        | Interleukin 10                                           | Protein Coding | 45        | GC01M206767 | 91.45555                   | <a href="https://www.genecards.org/cgi-bin/carddisp.pl?gene=IL10">https://www.genecards.org/cgi-bin/carddisp.pl?gene=IL10</a>         |
| TNF         | Tumor Necrosis Factor                                    | Protein Coding | 49        | GC06P083695 | 72.99629                   | <a href="https://www.genecards.org/cgi-bin/carddisp.pl?gene=TNF">https://www.genecards.org/cgi-bin/carddisp.pl?gene=TNF</a>           |
| CIITA       | Class II Major Histocompatibility Complex Transactivator | Protein Coding | 43        | GC16P012093 | 72.05125                   | <a href="https://www.genecards.org/cgi-bin/carddisp.pl?gene=CIITA">https://www.genecards.org/cgi-bin/carddisp.pl?gene=CIITA</a>       |
| STAT4       | Signal Transducer And Activator Of Transcription 4       | Protein Coding | 45        | GC02M191029 | 71.54918                   | <a href="https://www.genecards.org/cgi-bin/carddisp.pl?gene=STAT4">https://www.genecards.org/cgi-bin/carddisp.pl?gene=STAT4</a>       |
| MIF         | Macrophage Migration Inhibitory Factor                   | Protein Coding | 46        | GC22P023894 | 68.33475                   | <a href="https://www.genecards.org/cgi-bin/carddisp.pl?gene=MIF">https://www.genecards.org/cgi-bin/carddisp.pl?gene=MIF</a>           |
| SLC22A4     | Solute Carrier Family 22 Member 4                        | Protein Coding | 44        | GC05P132294 | 67.25108                   | <a href="https://www.genecards.org/cgi-bin/carddisp.pl?gene=SLC22A4">https://www.genecards.org/cgi-bin/carddisp.pl?gene=SLC22A4</a>   |

|         |                                                            |                |    |             |          |                                                                                                                                     |
|---------|------------------------------------------------------------|----------------|----|-------------|----------|-------------------------------------------------------------------------------------------------------------------------------------|
| IRF5    | Interferon Regulatory Factor 5                             | Protein Coding | 45 | GC07P128937 | 65.47908 | <a href="https://www.genecards.org/cgi-bin/carddisp.pl?gene=IRF5">https://www.genecards.org/cgi-bin/carddisp.pl?gene=IRF5</a>       |
| IL2RA   | Interleukin 2 Receptor Subunit Alpha                       | Protein Coding | 48 | GC10M006010 | 63.51823 | <a href="https://www.genecards.org/cgi-bin/carddisp.pl?gene=IL2RA">https://www.genecards.org/cgi-bin/carddisp.pl?gene=IL2RA</a>     |
| MIR146A | MicroRNA 146a                                              | RNA Gene       | 22 | GC05P160485 | 61.58196 | <a href="https://www.genecards.org/cgi-bin/carddisp.pl?gene=MIR146A">https://www.genecards.org/cgi-bin/carddisp.pl?gene=MIR146A</a> |
| NFKBIL1 | NFKB Inhibitor Like 1                                      | Protein Coding | 37 | GC06P083692 | 59.8594  | <a href="https://www.genecards.org/cgi-bin/carddisp.pl?gene=NFKBIL1">https://www.genecards.org/cgi-bin/carddisp.pl?gene=NFKBIL1</a> |
| CD244   | CD244 Molecule                                             | Protein Coding | 42 | GC01M160830 | 59.49183 | <a href="https://www.genecards.org/cgi-bin/carddisp.pl?gene=CD244">https://www.genecards.org/cgi-bin/carddisp.pl?gene=CD244</a>     |
| PSTPIP1 | Proline-Serine-Threonine Phosphatase Interacting Protein 1 | Protein Coding | 43 | GC15P076993 | 57.40873 | <a href="https://www.genecards.org/cgi-bin/carddisp.pl?gene=PSTPIP1">https://www.genecards.org/cgi-bin/carddisp.pl?gene=PSTPIP1</a> |
| HLA-B   | Major Histocompatibility Complex, Class I, B               | Protein Coding | 45 | GC06M065915 | 56.7578  | <a href="https://www.genecards.org/cgi-bin/carddisp.pl?gene=HLA-B">https://www.genecards.org/cgi-bin/carddisp.pl?gene=HLA-B</a>     |
| IL2RB   | Interleukin 2 Receptor Subunit Beta                        | Protein Coding | 46 | GC22M037125 | 54.85216 | <a href="https://www.genecards.org/cgi-bin/carddisp.pl?gene=IL2RB">https://www.genecards.org/cgi-bin/carddisp.pl?gene=IL2RB</a>     |
| MIR155  | MicroRNA 155                                               | RNA Gene       | 21 | GC21P025573 | 50.48026 | <a href="https://www.genecards.org/cgi-bin/carddisp.pl?gene=MIR155">https://www.genecards.org/cgi-bin/carddisp.pl?gene=MIR155</a>   |
| TLR1    | Toll Like Receptor 1                                       | Protein Coding | 45 | GC04M038793 | 50.3265  | <a href="https://www.genecards.org/cgi-bin/carddisp.pl?gene=TLR1">https://www.genecards.org/cgi-bin/carddisp.pl?gene=TLR1</a>       |
| LACC1   | Laccase Domain Containing 1                                | Protein Coding | 34 | GC13P043879 | 49.9617  | <a href="https://www.genecards.org/cgi-bin/carddisp.pl?gene=LACC1">https://www.genecards.org/cgi-bin/carddisp.pl?gene=LACC1</a>     |
| LTA     | Lymphotoxin Alpha                                          | Protein Coding | 40 | GC06P083693 | 48.15864 | <a href="https://www.genecards.org/cgi-bin/carddisp.pl?gene=LTA">https://www.genecards.org/cgi-bin/carddisp.pl?gene=LTA</a>         |
| MIR132  | MicroRNA 132                                               | RNA Gene       | 22 | GC17M002049 | 45.78649 | <a href="https://www.genecards.org/cgi-bin/carddisp.pl?gene=MIR132">https://www.genecards.org/cgi-bin/carddisp.pl?gene=MIR132</a>   |
| CHRNA3  | Cholinergic Receptor Nicotinic Gamma Subunit               | Protein Coding | 40 | GC02P232539 | 45.76495 | <a href="https://www.genecards.org/cgi-bin/carddisp.pl?gene=CHRNA3">https://www.genecards.org/cgi-bin/carddisp.pl?gene=CHRNA3</a>   |



|          |                                                        |                |    |             |          |                                                                                                                                      |
|----------|--------------------------------------------------------|----------------|----|-------------|----------|--------------------------------------------------------------------------------------------------------------------------------------|
|          |                                                        |                |    |             |          | <a href="http://www.ncbi.nlm.nih.gov/ncbi/cdd/bin/carddisp.pl?gene=CHRNA1">bin/carddisp.pl?gene=CHRNA1</a>                           |
| MIR150   | MicroRNA 150                                           | RNA Gene       | 22 | GC19M049500 | 44.93126 | <a href="http://www.genecards.org/cgi-bin/carddisp.pl?gene=MIR150">https://www.genecards.org/cgi-bin/carddisp.pl?gene=MIR150</a>     |
| PADI4    | Peptidyl Arginine Deiminase 4                          | Protein Coding | 42 | GC01P017308 | 43.63272 | <a href="http://www.genecards.org/cgi-bin/carddisp.pl?gene=PADI4">https://www.genecards.org/cgi-bin/carddisp.pl?gene=PADI4</a>       |
| IL1B     | Interleukin 1 Beta                                     | Protein Coding | 45 | GC02M112829 | 42.90001 | <a href="http://www.genecards.org/cgi-bin/carddisp.pl?gene=IL1B">https://www.genecards.org/cgi-bin/carddisp.pl?gene=IL1B</a>         |
| CTLA4    | Cytotoxic T-Lymphocyte Associated Protein 4            | Protein Coding | 44 | GC02P203854 | 41.95121 | <a href="http://www.genecards.org/cgi-bin/carddisp.pl?gene=CTLA4">https://www.genecards.org/cgi-bin/carddisp.pl?gene=CTLA4</a>       |
| CRP      | C-Reactive Protein                                     | Protein Coding | 44 | GC01M159727 | 41.41481 | <a href="http://www.genecards.org/cgi-bin/carddisp.pl?gene=CRP">https://www.genecards.org/cgi-bin/carddisp.pl?gene=CRP</a>           |
| COPA     | COPI Coat Complex Subunit Alpha                        | Protein Coding | 41 | GC01M160288 | 40.80445 | <a href="http://www.genecards.org/cgi-bin/carddisp.pl?gene=COPA">https://www.genecards.org/cgi-bin/carddisp.pl?gene=COPA</a>         |
| PTPN2    | Protein Tyrosine Phosphatase Non-Receptor Type 2       | Protein Coding | 45 | GC18M024779 | 39.99292 | <a href="http://www.genecards.org/cgi-bin/carddisp.pl?gene=PTPN2">https://www.genecards.org/cgi-bin/carddisp.pl?gene=PTPN2</a>       |
| CD247    | CD247 Molecule                                         | Protein Coding | 47 | GC01M167399 | 39.31931 | <a href="http://www.genecards.org/cgi-bin/carddisp.pl?gene=CD247">https://www.genecards.org/cgi-bin/carddisp.pl?gene=CD247</a>       |
| NOD2     | Nucleotide Binding Oligomerization Domain Containing 2 | Protein Coding | 46 | GC16P050693 | 38.51827 | <a href="http://www.genecards.org/cgi-bin/carddisp.pl?gene=NOD2">https://www.genecards.org/cgi-bin/carddisp.pl?gene=NOD2</a>         |
| TNFRSF1A | TNF Receptor Superfamily Member 1A                     | Protein Coding | 46 | GC12M006328 | 37.86541 | <a href="http://www.genecards.org/cgi-bin/carddisp.pl?gene=TNFRSF1A">https://www.genecards.org/cgi-bin/carddisp.pl?gene=TNFRSF1A</a> |
| IL17A    | Interleukin 17A                                        | Protein Coding | 40 | GC06P052186 | 37.71717 | <a href="http://www.genecards.org/cgi-bin/carddisp.pl?gene=IL17A">https://www.genecards.org/cgi-bin/carddisp.pl?gene=IL17A</a>       |
| ANKRD55  | Ankyrin Repeat Domain 55                               | Protein Coding | 32 | GC05M056099 | 37.61171 | <a href="http://www.genecards.org/cgi-bin/carddisp.pl?gene=ANKRD55">https://www.genecards.org/cgi-bin/carddisp.pl?gene=ANKRD55</a>   |
| NLRP1    | NLR Family Pyrin Domain Containing 1                   | Protein Coding | 42 | GC17M005499 | 36.6207  | <a href="http://www.genecards.org/cgi-bin/carddisp.pl?gene=NLRP1">https://www.genecards.org/cgi-bin/carddisp.pl?gene=NLRP1</a>       |

|          |                                    |                |    |             |          |                                                                                                                                       |
|----------|------------------------------------|----------------|----|-------------|----------|---------------------------------------------------------------------------------------------------------------------------------------|
| MMP3     | Matrix Metallopeptidase 3          | Protein Coding | 48 | GC11M102835 | 35.73695 | <a href="https://www.genecards.org/cgi-bin/carddisp.pl?gene=MMP3">https://www.genecards.org/cgi-bin/carddisp.pl?gene=MMP3</a>         |
| SYK      | Spleen Associated Tyrosine Kinase  | Protein Coding | 48 | GC09P092021 | 35.20958 | <a href="https://www.genecards.org/cgi-bin/carddisp.pl?gene=SYK">https://www.genecards.org/cgi-bin/carddisp.pl?gene=SYK</a>           |
| IFNG     | Interferon Gamma                   | Protein Coding | 46 | GC12M068154 | 34.14323 | <a href="https://www.genecards.org/cgi-bin/carddisp.pl?gene=IFNG">https://www.genecards.org/cgi-bin/carddisp.pl?gene=IFNG</a>         |
| IL1RN    | Interleukin 1 Receptor Antagonist  | Protein Coding | 46 | GC02P122460 | 33.94598 | <a href="https://www.genecards.org/cgi-bin/carddisp.pl?gene=IL1RN">https://www.genecards.org/cgi-bin/carddisp.pl?gene=IL1RN</a>       |
| CXCL8    | C-X-C Motif Chemokine Ligand 8     | Protein Coding | 38 | GC04P073740 | 32.69721 | <a href="https://www.genecards.org/cgi-bin/carddisp.pl?gene=CXCL8">https://www.genecards.org/cgi-bin/carddisp.pl?gene=CXCL8</a>       |
| IL2      | Interleukin 2                      | Protein Coding | 43 | GC04M122451 | 32.21674 | <a href="https://www.genecards.org/cgi-bin/carddisp.pl?gene=IL2">https://www.genecards.org/cgi-bin/carddisp.pl?gene=IL2</a>           |
| TNFRSF1B | TNF Receptor Superfamily Member 1B | Protein Coding | 45 | GC01P012235 | 32.18861 | <a href="https://www.genecards.org/cgi-bin/carddisp.pl?gene=TNFRSF1B">https://www.genecards.org/cgi-bin/carddisp.pl?gene=TNFRSF1B</a> |
| IL18     | Interleukin 18                     | Protein Coding | 41 | GC11M112143 | 31.71845 | <a href="https://www.genecards.org/cgi-bin/carddisp.pl?gene=IL18">https://www.genecards.org/cgi-bin/carddisp.pl?gene=IL18</a>         |
| TLR4     | Toll Like Receptor 4               | Protein Coding | 49 | GC09P117704 | 31.29188 | <a href="https://www.genecards.org/cgi-bin/carddisp.pl?gene=TLR4">https://www.genecards.org/cgi-bin/carddisp.pl?gene=TLR4</a>         |
| CCL2     | C-C Motif Chemokine Ligand 2       | Protein Coding | 46 | GC17P034255 | 31.17136 | <a href="https://www.genecards.org/cgi-bin/carddisp.pl?gene=CCL2">https://www.genecards.org/cgi-bin/carddisp.pl?gene=CCL2</a>         |
| FAS      | Fas Cell Surface Death Receptor    | Protein Coding | 48 | GC10P092502 | 30.14841 | <a href="https://www.genecards.org/cgi-bin/carddisp.pl?gene=FAS">https://www.genecards.org/cgi-bin/carddisp.pl?gene=FAS</a>           |
| TNFSF11  | TNF Superfamily Member 11          | Protein Coding | 45 | GC13P042562 | 29.90066 | <a href="https://www.genecards.org/cgi-bin/carddisp.pl?gene=TNFSF11">https://www.genecards.org/cgi-bin/carddisp.pl?gene=TNFSF11</a>   |
| MMP1     | Matrix Metallopeptidase 1          | Protein Coding | 49 | GC11M102810 | 29.77418 | <a href="https://www.genecards.org/cgi-bin/carddisp.pl?gene=MMP1">https://www.genecards.org/cgi-bin/carddisp.pl?gene=MMP1</a>         |
| IL4      | Interleukin 4                      | Protein Coding | 44 | GC05P132673 | 29.63962 | <a href="https://www.genecards.org/cgi-">https://www.genecards.org/cgi-</a>                                                           |

|           |                                                       |                |    |             |          |                                                                                                                                         |
|-----------|-------------------------------------------------------|----------------|----|-------------|----------|-----------------------------------------------------------------------------------------------------------------------------------------|
|           |                                                       |                |    |             |          | <a href="#">bin/carddisp.pl?gene=IL4</a>                                                                                                |
| MEFV      | MEFV Innate Immunity Regulator, Pyrin                 | Protein Coding | 42 | GC16M007269 | 29.47571 | <a href="https://www.genecards.org/cgi-bin/carddisp.pl?gene=MEFV">https://www.genecards.org/cgi-bin/carddisp.pl?gene=MEFV</a>           |
| COMP      | Cartilage Oligomeric Matrix Protein                   | Protein Coding | 45 | GC19M018783 | 28.75249 | <a href="https://www.genecards.org/cgi-bin/carddisp.pl?gene=COMP">https://www.genecards.org/cgi-bin/carddisp.pl?gene=COMP</a>           |
| FCRL3     | Fc Receptor Like 3                                    | Protein Coding | 37 | GC01M157674 | 28.64016 | <a href="https://www.genecards.org/cgi-bin/carddisp.pl?gene=FCRL3">https://www.genecards.org/cgi-bin/carddisp.pl?gene=FCRL3</a>         |
| IL1R1     | Interleukin 1 Receptor Type 1                         | Protein Coding | 44 | GC02P102136 | 28.62865 | <a href="https://www.genecards.org/cgi-bin/carddisp.pl?gene=IL1R1">https://www.genecards.org/cgi-bin/carddisp.pl?gene=IL1R1</a>         |
| ACP5      | Acid Phosphatase 5, Tartrate Resistant                | Protein Coding | 45 | GC19M011574 | 28.59747 | <a href="https://www.genecards.org/cgi-bin/carddisp.pl?gene=ACP5">https://www.genecards.org/cgi-bin/carddisp.pl?gene=ACP5</a>           |
| CCR6      | C-C Motif Chemokine Receptor 6                        | Protein Coding | 42 | GC06P167111 | 27.92742 | <a href="https://www.genecards.org/cgi-bin/carddisp.pl?gene=CCR6">https://www.genecards.org/cgi-bin/carddisp.pl?gene=CCR6</a>           |
| PTGS2     | Prostaglandin-Endoperoxide Synthase 2                 | Protein Coding | 47 | GC01M186640 | 27.54896 | <a href="https://www.genecards.org/cgi-bin/carddisp.pl?gene=PTGS2">https://www.genecards.org/cgi-bin/carddisp.pl?gene=PTGS2</a>         |
| IL23R     | Interleukin 23 Receptor                               | Protein Coding | 43 | GC01P067138 | 27.39661 | <a href="https://www.genecards.org/cgi-bin/carddisp.pl?gene=IL23R">https://www.genecards.org/cgi-bin/carddisp.pl?gene=IL23R</a>         |
| TRAF1     | TNF Receptor Associated Factor 1                      | Protein Coding | 41 | GC09M120902 | 27.28319 | <a href="https://www.genecards.org/cgi-bin/carddisp.pl?gene=TRAF1">https://www.genecards.org/cgi-bin/carddisp.pl?gene=TRAF1</a>         |
| HLA-DQB1  | Major Histocompatibility Complex, Class II, DQ Beta 1 | Protein Coding | 42 | GC06M066016 | 27.15154 | <a href="https://www.genecards.org/cgi-bin/carddisp.pl?gene=HLA-DQB1">https://www.genecards.org/cgi-bin/carddisp.pl?gene=HLA-DQB1</a>   |
| IL1A      | Interleukin 1 Alpha                                   | Protein Coding | 42 | GC02M112773 | 27.0717  | <a href="https://www.genecards.org/cgi-bin/carddisp.pl?gene=IL1A">https://www.genecards.org/cgi-bin/carddisp.pl?gene=IL1A</a>           |
| TNFRSF11B | TNF Receptor Superfamily Member 11b                   | Protein Coding | 46 | GC08M118923 | 26.88093 | <a href="https://www.genecards.org/cgi-bin/carddisp.pl?gene=TNFRSF11B">https://www.genecards.org/cgi-bin/carddisp.pl?gene=TNFRSF11B</a> |
| SAA1      | Serum Amyloid A1                                      | Protein Coding | 40 | GC11P018510 | 26.81518 | <a href="https://www.genecards.org/cgi-bin/carddisp.pl?gene=SAA1">https://www.genecards.org/cgi-bin/carddisp.pl?gene=SAA1</a>           |

|          |                                                 |                |    |             |          |                                                                                                                                     |
|----------|-------------------------------------------------|----------------|----|-------------|----------|-------------------------------------------------------------------------------------------------------------------------------------|
| COL2A1   | Collagen Type II Alpha 1 Chain                  | Protein Coding | 46 | GC12M047972 | 26.33231 | <a href="https://www.genecards.org/cgi-bin/carddisp.pl?gene=COL2A1">https://www.genecards.org/cgi-bin/carddisp.pl?gene=COL2A1</a>   |
| CD40     | CD40 Molecule                                   | Protein Coding | 46 | GC20P046118 | 26.27834 | <a href="https://www.genecards.org/cgi-bin/carddisp.pl?gene=CD40">https://www.genecards.org/cgi-bin/carddisp.pl?gene=CD40</a>       |
| MMP13    | Matrix Metalloproteinase 13                     | Protein Coding | 49 | GC11M102942 | 25.94187 | <a href="https://www.genecards.org/cgi-bin/carddisp.pl?gene=MMP13">https://www.genecards.org/cgi-bin/carddisp.pl?gene=MMP13</a>     |
| CCR5     | C-C Motif Chemokine Receptor 5                  | Protein Coding | 44 | GC03P046776 | 25.522   | <a href="https://www.genecards.org/cgi-bin/carddisp.pl?gene=CCR5">https://www.genecards.org/cgi-bin/carddisp.pl?gene=CCR5</a>       |
| MMP9     | Matrix Metalloproteinase 9                      | Protein Coding | 52 | GC20P046008 | 24.86951 | <a href="https://www.genecards.org/cgi-bin/carddisp.pl?gene=MMP9">https://www.genecards.org/cgi-bin/carddisp.pl?gene=MMP9</a>       |
| MTHFR    | Methylenetetrahydrofolate Reductase             | Protein Coding | 46 | GC01M011785 | 24.83603 | <a href="https://www.genecards.org/cgi-bin/carddisp.pl?gene=MTHFR">https://www.genecards.org/cgi-bin/carddisp.pl?gene=MTHFR</a>     |
| MACIR    | Macrophage Immunometabolism Regulator           | Protein Coding | 24 | GC05P103259 | 24.80777 | <a href="https://www.genecards.org/cgi-bin/carddisp.pl?gene=MACIR">https://www.genecards.org/cgi-bin/carddisp.pl?gene=MACIR</a>     |
| FCGR2A   | Fc Gamma Receptor IIa                           | Protein Coding | 45 | GC01P161505 | 24.80118 | <a href="https://www.genecards.org/cgi-bin/carddisp.pl?gene=FCGR2A">https://www.genecards.org/cgi-bin/carddisp.pl?gene=FCGR2A</a>   |
| SLC11A1  | Solute Carrier Family 11 Member 1               | Protein Coding | 45 | GC02P218382 | 24.69929 | <a href="https://www.genecards.org/cgi-bin/carddisp.pl?gene=SLC11A1">https://www.genecards.org/cgi-bin/carddisp.pl?gene=SLC11A1</a> |
| IL6R     | Interleukin 6 Receptor                          | Protein Coding | 46 | GC01P154405 | 24.43249 | <a href="https://www.genecards.org/cgi-bin/carddisp.pl?gene=IL6R">https://www.genecards.org/cgi-bin/carddisp.pl?gene=IL6R</a>       |
| S100A12  | S100 Calcium Binding Protein A12                | Protein Coding | 38 | GC01M153373 | 24.30909 | <a href="https://www.genecards.org/cgi-bin/carddisp.pl?gene=S100A12">https://www.genecards.org/cgi-bin/carddisp.pl?gene=S100A12</a> |
| MMP2     | Matrix Metalloproteinase 2                      | Protein Coding | 50 | GC16P055390 | 24.25435 | <a href="https://www.genecards.org/cgi-bin/carddisp.pl?gene=MMP2">https://www.genecards.org/cgi-bin/carddisp.pl?gene=MMP2</a>       |
| TLR2     | Toll Like Receptor 2                            | Protein Coding | 49 | GC04P153684 | 24.10735 | <a href="https://www.genecards.org/cgi-bin/carddisp.pl?gene=TLR2">https://www.genecards.org/cgi-bin/carddisp.pl?gene=TLR2</a>       |
| IL1RAPL2 | Interleukin 1 Receptor Accessory Protein Like 2 | Protein Coding | 38 | GC0XP104566 | 24.05863 | <a href="https://www.genecards.org/cgi-">https://www.genecards.org/cgi-</a>                                                         |

|        |                                                 |                |    |             |          |                                                                                                                                          |
|--------|-------------------------------------------------|----------------|----|-------------|----------|------------------------------------------------------------------------------------------------------------------------------------------|
|        |                                                 |                |    |             |          | <a href="http://www.ncbi.nlm.nih.gov/ncbi/cdd/bin/carddisp.pl?gene=IL1RAPL2">bin/carddisp.pl?gene=IL1RAPL2</a>                           |
| IL15   | Interleukin 15                                  | Protein Coding | 38 | GC04P141636 | 24.05667 | <a href="http://www.ncbi.nlm.nih.gov/ncbi/cdd/bin/carddisp.pl?gene=IL15">https://www.genecards.org/cgi-bin/carddisp.pl?gene=IL15</a>     |
| VEGFA  | Vascular Endothelial Growth Factor A            | Protein Coding | 46 | GC06P043770 | 23.87633 | <a href="http://www.ncbi.nlm.nih.gov/ncbi/cdd/bin/carddisp.pl?gene=VEGFA">https://www.genecards.org/cgi-bin/carddisp.pl?gene=VEGFA</a>   |
| TGFB1  | Transforming Growth Factor Beta 1               | Protein Coding | 49 | GC19M041301 | 23.78368 | <a href="http://www.ncbi.nlm.nih.gov/ncbi/cdd/bin/carddisp.pl?gene=TGFB1">https://www.genecards.org/cgi-bin/carddisp.pl?gene=TGFB1</a>   |
| VCAM1  | Vascular Cell Adhesion Molecule 1               | Protein Coding | 44 | GC01P100719 | 23.69912 | <a href="http://www.ncbi.nlm.nih.gov/ncbi/cdd/bin/carddisp.pl?gene=VCAM1">https://www.genecards.org/cgi-bin/carddisp.pl?gene=VCAM1</a>   |
| BLK    | BLK Proto-Oncogene, Src Family Tyrosine Kinase  | Protein Coding | 48 | GC08P011486 | 23.68699 | <a href="http://www.ncbi.nlm.nih.gov/ncbi/cdd/bin/carddisp.pl?gene=BLK">https://www.genecards.org/cgi-bin/carddisp.pl?gene=BLK</a>       |
| CCL5   | C-C Motif Chemokine Ligand 5                    | Protein Coding | 41 | GC17M035871 | 23.44533 | <a href="http://www.ncbi.nlm.nih.gov/ncbi/cdd/bin/carddisp.pl?gene=CCL5">https://www.genecards.org/cgi-bin/carddisp.pl?gene=CCL5</a>     |
| NLRP3  | NLR Family Pyrin Domain Containing 3            | Protein Coding | 45 | GC01P247415 | 23.39787 | <a href="http://www.ncbi.nlm.nih.gov/ncbi/cdd/bin/carddisp.pl?gene=NLRP3">https://www.genecards.org/cgi-bin/carddisp.pl?gene=NLRP3</a>   |
| S100A9 | S100 Calcium Binding Protein A9                 | Protein Coding | 41 | GC01P153357 | 23.16271 | <a href="http://www.ncbi.nlm.nih.gov/ncbi/cdd/bin/carddisp.pl?gene=S100A9">https://www.genecards.org/cgi-bin/carddisp.pl?gene=S100A9</a> |
| IL6ST  | Interleukin 6 Cytokine Family Signal Transducer | Protein Coding | 46 | GC05M055935 | 23.02585 | <a href="http://www.ncbi.nlm.nih.gov/ncbi/cdd/bin/carddisp.pl?gene=IL6ST">https://www.genecards.org/cgi-bin/carddisp.pl?gene=IL6ST</a>   |
| FOXP3  | Forkhead Box P3                                 | Protein Coding | 45 | GC0XM049250 | 22.8975  | <a href="http://www.ncbi.nlm.nih.gov/ncbi/cdd/bin/carddisp.pl?gene=FOXP3">https://www.genecards.org/cgi-bin/carddisp.pl?gene=FOXP3</a>   |
| FASLG  | Fas Ligand                                      | Protein Coding | 45 | GC01P172628 | 22.8768  | <a href="http://www.ncbi.nlm.nih.gov/ncbi/cdd/bin/carddisp.pl?gene=FASLG">https://www.genecards.org/cgi-bin/carddisp.pl?gene=FASLG</a>   |
| TTR    | Transthyretin                                   | Protein Coding | 46 | GC18P031557 | 22.84327 | <a href="http://www.ncbi.nlm.nih.gov/ncbi/cdd/bin/carddisp.pl?gene=TTR">https://www.genecards.org/cgi-bin/carddisp.pl?gene=TTR</a>       |
| SPP1   | Secreted Phosphoprotein 1                       | Protein Coding | 44 | GC04P087975 | 22.7118  | <a href="http://www.ncbi.nlm.nih.gov/ncbi/cdd/bin/carddisp.pl?gene=SPP1">https://www.genecards.org/cgi-bin/carddisp.pl?gene=SPP1</a>     |

|          |                                                        |                |    |             |          |                                                                                                                                       |
|----------|--------------------------------------------------------|----------------|----|-------------|----------|---------------------------------------------------------------------------------------------------------------------------------------|
| FCGR3B   | Fc Gamma Receptor IIb                                  | Protein Coding | 42 | GC01M161623 | 22.6153  | <a href="https://www.genecards.org/cgi-bin/carddisp.pl?gene=FCGR3B">https://www.genecards.org/cgi-bin/carddisp.pl?gene=FCGR3B</a>     |
| PDCD1    | Programmed Cell Death 1                                | Protein Coding | 45 | GC02M241849 | 22.54808 | <a href="https://www.genecards.org/cgi-bin/carddisp.pl?gene=PDCD1">https://www.genecards.org/cgi-bin/carddisp.pl?gene=PDCD1</a>       |
| RELN     | Reelin                                                 | Protein Coding | 42 | GC07M103471 | 22.50375 | <a href="https://www.genecards.org/cgi-bin/carddisp.pl?gene=RELN">https://www.genecards.org/cgi-bin/carddisp.pl?gene=RELN</a>         |
| SERPINH1 | Serpin Family H Member 1                               | Protein Coding | 44 | GC11P075562 | 22.43176 | <a href="https://www.genecards.org/cgi-bin/carddisp.pl?gene=SERPINH1">https://www.genecards.org/cgi-bin/carddisp.pl?gene=SERPINH1</a> |
| TNIP1    | TNFAIP3 Interacting Protein 1                          | Protein Coding | 39 | GC05M151029 | 22.3955  | <a href="https://www.genecards.org/cgi-bin/carddisp.pl?gene=TNIP1">https://www.genecards.org/cgi-bin/carddisp.pl?gene=TNIP1</a>       |
| ICAM1    | Intercellular Adhesion Molecule 1                      | Protein Coding | 48 | GC19P010466 | 22.3233  | <a href="https://www.genecards.org/cgi-bin/carddisp.pl?gene=ICAM1">https://www.genecards.org/cgi-bin/carddisp.pl?gene=ICAM1</a>       |
| TIMP1    | TIMP Metallopeptidase Inhibitor 1                      | Protein Coding | 42 | GC0XP047596 | 22.24322 | <a href="https://www.genecards.org/cgi-bin/carddisp.pl?gene=TIMP1">https://www.genecards.org/cgi-bin/carddisp.pl?gene=TIMP1</a>       |
| FCGR3A   | Fc Gamma Receptor IIIa                                 | Protein Coding | 44 | GC01M161541 | 22.2111  | <a href="https://www.genecards.org/cgi-bin/carddisp.pl?gene=FCGR3A">https://www.genecards.org/cgi-bin/carddisp.pl?gene=FCGR3A</a>     |
| CSF2     | Colony Stimulating Factor 2                            | Protein Coding | 41 | GC05P132073 | 22.16519 | <a href="https://www.genecards.org/cgi-bin/carddisp.pl?gene=CSF2">https://www.genecards.org/cgi-bin/carddisp.pl?gene=CSF2</a>         |
| HLA-DQA1 | Major Histocompatibility Complex, Class II, DQ Alpha 1 | Protein Coding | 42 | GC06P083727 | 22.13786 | <a href="https://www.genecards.org/cgi-bin/carddisp.pl?gene=HLA-DQA1">https://www.genecards.org/cgi-bin/carddisp.pl?gene=HLA-DQA1</a> |
| IL13     | Interleukin 13                                         | Protein Coding | 41 | GC05P132656 | 21.81797 | <a href="https://www.genecards.org/cgi-bin/carddisp.pl?gene=IL13">https://www.genecards.org/cgi-bin/carddisp.pl?gene=IL13</a>         |
| STAT3    | Signal Transducer And Activator Of Transcription 3     | Protein Coding | 50 | GC17M042313 | 21.56902 | <a href="https://www.genecards.org/cgi-bin/carddisp.pl?gene=STAT3">https://www.genecards.org/cgi-bin/carddisp.pl?gene=STAT3</a>       |
| BGLAP    | Bone Gamma-Carboxyglutamate Protein                    | Protein Coding | 38 | GC01P156242 | 21.53297 | <a href="https://www.genecards.org/cgi-bin/carddisp.pl?gene=BGLAP">https://www.genecards.org/cgi-bin/carddisp.pl?gene=BGLAP</a>       |
| TNFAIP3  | TNF Alpha Induced Protein 3                            | Protein Coding | 46 | GC06P137866 | 21.48916 | <a href="https://www.genecards.org/cgi-bin/carddisp.pl?gene=TNFAIP3">https://www.genecards.org/cgi-bin/carddisp.pl?gene=TNFAIP3</a>   |

|           |                                     |                |    |             |          |                                                                                                                                                |
|-----------|-------------------------------------|----------------|----|-------------|----------|------------------------------------------------------------------------------------------------------------------------------------------------|
|           |                                     |                |    |             |          | <a href="http://www.ncbi.nlm.nih.gov/ncbi/cdd/bin/carddisp.pl?gene=TNFAIP3">bin/carddisp.pl?gene=TNFAIP3</a>                                   |
| FCGR2B    | Fc Gamma Receptor IIb               | Protein Coding | 45 | GC01P161724 | 21.43319 | <a href="http://www.ncbi.nlm.nih.gov/ncbi/cdd/bin/carddisp.pl?gene=FCGR2B">https://www.genecards.org/cgi-bin/carddisp.pl?gene=FCGR2B</a>       |
| IL21      | Interleukin 21                      | Protein Coding | 42 | GC04M122612 | 21.09099 | <a href="http://www.ncbi.nlm.nih.gov/ncbi/cdd/bin/carddisp.pl?gene=IL21">https://www.genecards.org/cgi-bin/carddisp.pl?gene=IL21</a>           |
| CD40LG    | CD40 Ligand                         | Protein Coding | 46 | GC0XP136649 | 21.07109 | <a href="http://www.ncbi.nlm.nih.gov/ncbi/cdd/bin/carddisp.pl?gene=CD40LG">https://www.genecards.org/cgi-bin/carddisp.pl?gene=CD40LG</a>       |
| SELE      | Selectin E                          | Protein Coding | 41 | GC01M169722 | 21.0079  | <a href="http://www.ncbi.nlm.nih.gov/ncbi/cdd/bin/carddisp.pl?gene=SELE">https://www.genecards.org/cgi-bin/carddisp.pl?gene=SELE</a>           |
| CSF1      | Colony Stimulating Factor 1         | Protein Coding | 42 | GC01P109911 | 20.96239 | <a href="http://www.ncbi.nlm.nih.gov/ncbi/cdd/bin/carddisp.pl?gene=CSF1">https://www.genecards.org/cgi-bin/carddisp.pl?gene=CSF1</a>           |
| CCR1      | C-C Motif Chemokine Receptor 1      | Protein Coding | 44 | GC03M046218 | 20.89093 | <a href="http://www.ncbi.nlm.nih.gov/ncbi/cdd/bin/carddisp.pl?gene=CCR1">https://www.genecards.org/cgi-bin/carddisp.pl?gene=CCR1</a>           |
| CD79A     | CD79a Molecule                      | Protein Coding | 45 | GC19P041877 | 20.05658 | <a href="http://www.ncbi.nlm.nih.gov/ncbi/cdd/bin/carddisp.pl?gene=CD79A">https://www.genecards.org/cgi-bin/carddisp.pl?gene=CD79A</a>         |
| MBL2      | Mannose Binding Lectin 2            | Protein Coding | 45 | GC10M052760 | 20.04278 | <a href="http://www.ncbi.nlm.nih.gov/ncbi/cdd/bin/carddisp.pl?gene=MBL2">https://www.genecards.org/cgi-bin/carddisp.pl?gene=MBL2</a>           |
| TNFRSF11A | TNF Receptor Superfamily Member 11a | Protein Coding | 44 | GC18P062325 | 20.01063 | <a href="http://www.ncbi.nlm.nih.gov/ncbi/cdd/bin/carddisp.pl?gene=TNFRSF11A">https://www.genecards.org/cgi-bin/carddisp.pl?gene=TNFRSF11A</a> |
| ITGAM     | Integrin Subunit Alpha M            | Protein Coding | 46 | GC16P041126 | 19.97729 | <a href="http://www.ncbi.nlm.nih.gov/ncbi/cdd/bin/carddisp.pl?gene=ITGAM">https://www.genecards.org/cgi-bin/carddisp.pl?gene=ITGAM</a>         |
| FLG       | Filaggrin                           | Protein Coding | 40 | GC01M152274 | 19.95661 | <a href="http://www.ncbi.nlm.nih.gov/ncbi/cdd/bin/carddisp.pl?gene=FLG">https://www.genecards.org/cgi-bin/carddisp.pl?gene=FLG</a>             |
| HMGB1     | High Mobility Group Box 1           | Protein Coding | 44 | GC13M030456 | 19.69697 | <a href="http://www.ncbi.nlm.nih.gov/ncbi/cdd/bin/carddisp.pl?gene=HMGB1">https://www.genecards.org/cgi-bin/carddisp.pl?gene=HMGB1</a>         |
| CXCL10    | C-X-C Motif Chemokine Ligand 10     | Protein Coding | 42 | GC04M076021 | 19.56744 | <a href="http://www.ncbi.nlm.nih.gov/ncbi/cdd/bin/carddisp.pl?gene=CXCL10">https://www.genecards.org/cgi-bin/carddisp.pl?gene=CXCL10</a>       |

|          |                                                       |                |    |             |          |                                                                                                                                       |
|----------|-------------------------------------------------------|----------------|----|-------------|----------|---------------------------------------------------------------------------------------------------------------------------------------|
| REL      | REL Proto-Oncogene, NF-KB Subunit                     | Protein Coding | 45 | GC02P060881 | 19.2732  | <a href="https://www.genecards.org/cgi-bin/carddisp.pl?gene=REL">https://www.genecards.org/cgi-bin/carddisp.pl?gene=REL</a>           |
| ADAM17   | ADAM Metallopeptidase Domain 17                       | Protein Coding | 49 | GC02M009488 | 19.21072 | <a href="https://www.genecards.org/cgi-bin/carddisp.pl?gene=ADAM17">https://www.genecards.org/cgi-bin/carddisp.pl?gene=ADAM17</a>     |
| ALB      | Albumin                                               | Protein Coding | 48 | GC04P073397 | 19.17338 | <a href="https://www.genecards.org/cgi-bin/carddisp.pl?gene=ALB">https://www.genecards.org/cgi-bin/carddisp.pl?gene=ALB</a>           |
| HLA-DPB1 | Major Histocompatibility Complex, Class II, DP Beta 1 | Protein Coding | 44 | GC06P083734 | 19.14252 | <a href="https://www.genecards.org/cgi-bin/carddisp.pl?gene=HLA-DPB1">https://www.genecards.org/cgi-bin/carddisp.pl?gene=HLA-DPB1</a> |
| IL23A    | Interleukin 23 Subunit Alpha                          | Protein Coding | 36 | GC12P057293 | 19.07604 | <a href="https://www.genecards.org/cgi-bin/carddisp.pl?gene=IL23A">https://www.genecards.org/cgi-bin/carddisp.pl?gene=IL23A</a>       |
| IL17RA   | Interleukin 17 Receptor A                             | Protein Coding | 43 | GC22P018684 | 18.97851 | <a href="https://www.genecards.org/cgi-bin/carddisp.pl?gene=IL17RA">https://www.genecards.org/cgi-bin/carddisp.pl?gene=IL17RA</a>     |
| GPI      | Glucose-6-Phosphate Isomerase                         | Protein Coding | 46 | GC19P034359 | 18.90178 | <a href="https://www.genecards.org/cgi-bin/carddisp.pl?gene=GPI">https://www.genecards.org/cgi-bin/carddisp.pl?gene=GPI</a>           |
| TNFSF13B | TNF Superfamily Member 13b                            | Protein Coding | 43 | GC13P108251 | 18.76754 | <a href="https://www.genecards.org/cgi-bin/carddisp.pl?gene=TNFSF13B">https://www.genecards.org/cgi-bin/carddisp.pl?gene=TNFSF13B</a> |
| FSTL1    | Follistatin Like 1                                    | Protein Coding | 41 | GC03M120392 | 18.68401 | <a href="https://www.genecards.org/cgi-bin/carddisp.pl?gene=FSTL1">https://www.genecards.org/cgi-bin/carddisp.pl?gene=FSTL1</a>       |
| PRTN3    | Proteinase 3                                          | Protein Coding | 44 | GC19P000840 | 18.60434 | <a href="https://www.genecards.org/cgi-bin/carddisp.pl?gene=PRTN3">https://www.genecards.org/cgi-bin/carddisp.pl?gene=PRTN3</a>       |
| IL10RA   | Interleukin 10 Receptor Subunit Alpha                 | Protein Coding | 44 | GC11P117987 | 18.60401 | <a href="https://www.genecards.org/cgi-bin/carddisp.pl?gene=IL10RA">https://www.genecards.org/cgi-bin/carddisp.pl?gene=IL10RA</a>     |
| MMP12    | Matrix Metallopeptidase 12                            | Protein Coding | 45 | GC11M102862 | 18.59571 | <a href="https://www.genecards.org/cgi-bin/carddisp.pl?gene=MMP12">https://www.genecards.org/cgi-bin/carddisp.pl?gene=MMP12</a>       |
| HLA-C    | Major Histocompatibility Complex, Class I, C          | Protein Coding | 44 | GC06M065914 | 18.48296 | <a href="https://www.genecards.org/cgi-bin/carddisp.pl?gene=HLA-C">https://www.genecards.org/cgi-bin/carddisp.pl?gene=HLA-C</a>       |
| TNFAIP6  | TNF Alpha Induced Protein 6                           | Protein Coding | 41 | GC02P151357 | 18.47494 | <a href="https://www.genecards.org/cgi-bin/carddisp.pl?gene=TNFAIP6">https://www.genecards.org/cgi-bin/carddisp.pl?gene=TNFAIP6</a>   |



|         |                                                 |                |    |             |          |                                                                                                                                            |
|---------|-------------------------------------------------|----------------|----|-------------|----------|--------------------------------------------------------------------------------------------------------------------------------------------|
|         |                                                 |                |    |             |          | <a href="http://www.ncbi.nlm.nih.gov/ncbi/cdd/bin/carddisp.pl?gene=TNFAIP6">bin/carddisp.pl?gene=TNFAIP6</a>                               |
| PTGS1   | Prostaglandin-Endoperoxide Synthase 1           | Protein Coding | 45 | GC09P122370 | 18.27404 | <a href="http://www.ncbi.nlm.nih.gov/ncbi/cdd/bin/carddisp.pl?gene=PTGS1">https://www.genecards.org/cgi-bin/carddisp.pl?gene=PTGS1</a>     |
| BTNL2   | Butyrophilin Like 2                             | Protein Coding | 38 | GC06M032393 | 18.27045 | <a href="http://www.ncbi.nlm.nih.gov/ncbi/cdd/bin/carddisp.pl?gene=BTNL2">https://www.genecards.org/cgi-bin/carddisp.pl?gene=BTNL2</a>     |
| HSPD1   | Heat Shock Protein Family D (Hsp60) Member 1    | Protein Coding | 46 | GC02M197486 | 18.14313 | <a href="http://www.ncbi.nlm.nih.gov/ncbi/cdd/bin/carddisp.pl?gene=HSPD1">https://www.genecards.org/cgi-bin/carddisp.pl?gene=HSPD1</a>     |
| MICA    | MHC Class I Polypeptide-Related Sequence A      | Protein Coding | 38 | GC06P031399 | 18.13344 | <a href="http://www.ncbi.nlm.nih.gov/ncbi/cdd/bin/carddisp.pl?gene=MICA">https://www.genecards.org/cgi-bin/carddisp.pl?gene=MICA</a>       |
| CXCR3   | C-X-C Motif Chemokine Receptor 3                | Protein Coding | 42 | GC0XM071615 | 18.09852 | <a href="http://www.ncbi.nlm.nih.gov/ncbi/cdd/bin/carddisp.pl?gene=CXCR3">https://www.genecards.org/cgi-bin/carddisp.pl?gene=CXCR3</a>     |
| MPO     | Myeloperoxidase                                 | Protein Coding | 49 | GC17M058269 | 18.08973 | <a href="http://www.ncbi.nlm.nih.gov/ncbi/cdd/bin/carddisp.pl?gene=MPO">https://www.genecards.org/cgi-bin/carddisp.pl?gene=MPO</a>         |
| CCL3    | C-C Motif Chemokine Ligand 3                    | Protein Coding | 37 | GC17M036088 | 18.05998 | <a href="http://www.ncbi.nlm.nih.gov/ncbi/cdd/bin/carddisp.pl?gene=CCL3">https://www.genecards.org/cgi-bin/carddisp.pl?gene=CCL3</a>       |
| ITGAV   | Integrin Subunit Alpha V                        | Protein Coding | 45 | GC02P186589 | 17.84391 | <a href="http://www.ncbi.nlm.nih.gov/ncbi/cdd/bin/carddisp.pl?gene=ITGAV">https://www.genecards.org/cgi-bin/carddisp.pl?gene=ITGAV</a>     |
| ADIPOQ  | Adiponectin, C1Q And Collagen Domain Containing | Protein Coding | 44 | GC03P186842 | 17.7664  | <a href="http://www.ncbi.nlm.nih.gov/ncbi/cdd/bin/carddisp.pl?gene=ADIPOQ">https://www.genecards.org/cgi-bin/carddisp.pl?gene=ADIPOQ</a>   |
| MAFB    | MAF BZIP Transcription Factor B                 | Protein Coding | 42 | GC20M040685 | 17.73362 | <a href="http://www.ncbi.nlm.nih.gov/ncbi/cdd/bin/carddisp.pl?gene=MAFB">https://www.genecards.org/cgi-bin/carddisp.pl?gene=MAFB</a>       |
| MMP8    | Matrix Metalloproteinase 8                      | Protein Coding | 46 | GC11M102617 | 17.72693 | <a href="http://www.ncbi.nlm.nih.gov/ncbi/cdd/bin/carddisp.pl?gene=MMP8">https://www.genecards.org/cgi-bin/carddisp.pl?gene=MMP8</a>       |
| CPT2    | Carnitine Palmitoyltransferase 2                | Protein Coding | 48 | GC01P053196 | 17.68966 | <a href="http://www.ncbi.nlm.nih.gov/ncbi/cdd/bin/carddisp.pl?gene=CPT2">https://www.genecards.org/cgi-bin/carddisp.pl?gene=CPT2</a>       |
| SLC19A1 | Solute Carrier Family 19 Member 1               | Protein Coding | 45 | GC21M045493 | 17.67178 | <a href="http://www.ncbi.nlm.nih.gov/ncbi/cdd/bin/carddisp.pl?gene=SLC19A1">https://www.genecards.org/cgi-bin/carddisp.pl?gene=SLC19A1</a> |

|        |                                                |                |    |             |          |                                                                                                                                   |
|--------|------------------------------------------------|----------------|----|-------------|----------|-----------------------------------------------------------------------------------------------------------------------------------|
| TAGAP  | T Cell Activation RhoGTPase Activating Protein | Protein Coding | 38 | GC06M159034 | 17.66101 | <a href="https://www.genecards.org/cgi-bin/carddisp.pl?gene=TAGAP">https://www.genecards.org/cgi-bin/carddisp.pl?gene=TAGAP</a>   |
| CCR2   | C-C Motif Chemokine Receptor 2                 | Protein Coding | 44 | GC03P046775 | 17.63825 | <a href="https://www.genecards.org/cgi-bin/carddisp.pl?gene=CCR2">https://www.genecards.org/cgi-bin/carddisp.pl?gene=CCR2</a>     |
| OLAH   | Oleoyl-ACP Hydrolase                           | Protein Coding | 33 | GC10P015032 | 17.63729 | <a href="https://www.genecards.org/cgi-bin/carddisp.pl?gene=OLAH">https://www.genecards.org/cgi-bin/carddisp.pl?gene=OLAH</a>     |
| SIAE   | Sialic Acid Acetylesterase                     | Protein Coding | 37 | GC11M124633 | 17.62323 | <a href="https://www.genecards.org/cgi-bin/carddisp.pl?gene=SIAE">https://www.genecards.org/cgi-bin/carddisp.pl?gene=SIAE</a>     |
| IFNB1  | Interferon Beta 1                              | Protein Coding | 41 | GC09M021077 | 17.61863 | <a href="https://www.genecards.org/cgi-bin/carddisp.pl?gene=IFNB1">https://www.genecards.org/cgi-bin/carddisp.pl?gene=IFNB1</a>   |
| RELB   | RELB Proto-Oncogene, NF-KB Subunit             | Protein Coding | 43 | GC19P066884 | 17.61034 | <a href="https://www.genecards.org/cgi-bin/carddisp.pl?gene=RELB">https://www.genecards.org/cgi-bin/carddisp.pl?gene=RELB</a>     |
| NFKBIA | NFKB Inhibitor Alpha                           | Protein Coding | 48 | GC14M035401 | 17.58748 | <a href="https://www.genecards.org/cgi-bin/carddisp.pl?gene=NFKBIA">https://www.genecards.org/cgi-bin/carddisp.pl?gene=NFKBIA</a> |
| CAT    | Catalase                                       | Protein Coding | 49 | GC11P034460 | 17.58331 | <a href="https://www.genecards.org/cgi-bin/carddisp.pl?gene=CAT">https://www.genecards.org/cgi-bin/carddisp.pl?gene=CAT</a>       |
| MAPK14 | Mitogen-Activated Protein Kinase 14            | Protein Coding | 49 | GC06P083841 | 17.47903 | <a href="https://www.genecards.org/cgi-bin/carddisp.pl?gene=MAPK14">https://www.genecards.org/cgi-bin/carddisp.pl?gene=MAPK14</a> |
| CD28   | CD28 Molecule                                  | Protein Coding | 45 | GC02P203706 | 17.39115 | <a href="https://www.genecards.org/cgi-bin/carddisp.pl?gene=CD28">https://www.genecards.org/cgi-bin/carddisp.pl?gene=CD28</a>     |
| MAPK1  | Mitogen-Activated Protein Kinase 1             | Protein Coding | 49 | GC22M021759 | 17.20773 | <a href="https://www.genecards.org/cgi-bin/carddisp.pl?gene=MAPK1">https://www.genecards.org/cgi-bin/carddisp.pl?gene=MAPK1</a>   |
| NOS2   | Nitric Oxide Synthase 2                        | Protein Coding | 47 | GC17M027756 | 17.16114 | <a href="https://www.genecards.org/cgi-bin/carddisp.pl?gene=NOS2">https://www.genecards.org/cgi-bin/carddisp.pl?gene=NOS2</a>     |
| IL37   | Interleukin 37                                 | Protein Coding | 36 | GC02P122457 | 17.11699 | <a href="https://www.genecards.org/cgi-bin/carddisp.pl?gene=IL37">https://www.genecards.org/cgi-bin/carddisp.pl?gene=IL37</a>     |
| CD44   | CD44 Molecule (Indian Blood Group)             | Protein Coding | 45 | GC11P035139 | 17.08488 | <a href="https://www.genecards.org/cgi-bin/carddisp.pl?gene=CD44">https://www.genecards.org/cgi-bin/carddisp.pl?gene=CD44</a>     |

|           |                                                                                    |                |    |             |          |                                                                                                                                         |
|-----------|------------------------------------------------------------------------------------|----------------|----|-------------|----------|-----------------------------------------------------------------------------------------------------------------------------------------|
|           |                                                                                    |                |    |             |          | <a href="https://www.genecards.org/cgi-bin/carddisp.pl?gene=CD44">bin/carddisp.pl?gene=CD44</a>                                         |
| CHI3L1    | Chitinase 3 Like 1                                                                 | Protein Coding | 44 | GC01M203148 | 17.0572  | <a href="https://www.genecards.org/cgi-bin/carddisp.pl?gene=CHI3L1">https://www.genecards.org/cgi-bin/carddisp.pl?gene=CHI3L1</a>       |
| HSPA4     | Heat Shock Protein Family A (Hsp70) Member 4                                       | Protein Coding | 40 | GC05P133051 | 16.94462 | <a href="https://www.genecards.org/cgi-bin/carddisp.pl?gene=HSPA4">https://www.genecards.org/cgi-bin/carddisp.pl?gene=HSPA4</a>         |
| STEAP4    | STEAP4 Metalloreductase                                                            | Protein Coding | 40 | GC07M088392 | 16.91617 | <a href="https://www.genecards.org/cgi-bin/carddisp.pl?gene=STEAP4">https://www.genecards.org/cgi-bin/carddisp.pl?gene=STEAP4</a>       |
| CD36      | CD36 Molecule                                                                      | Protein Coding | 46 | GC07P080369 | 16.88031 | <a href="https://www.genecards.org/cgi-bin/carddisp.pl?gene=CD36">https://www.genecards.org/cgi-bin/carddisp.pl?gene=CD36</a>           |
| ATIC      | 5-Aminoimidazole-4-Carboxamide Ribonucleotide Formyltransferase/IMP Cyclohydrolase | Protein Coding | 44 | GC02P215311 | 16.79704 | <a href="https://www.genecards.org/cgi-bin/carddisp.pl?gene=ATIC">https://www.genecards.org/cgi-bin/carddisp.pl?gene=ATIC</a>           |
| HP        | Haptoglobin                                                                        | Protein Coding | 44 | GC16P072086 | 16.76994 | <a href="https://www.genecards.org/cgi-bin/carddisp.pl?gene=HP">https://www.genecards.org/cgi-bin/carddisp.pl?gene=HP</a>               |
| S100A8    | S100 Calcium Binding Protein A8                                                    | Protein Coding | 41 | GC01M153391 | 16.75831 | <a href="https://www.genecards.org/cgi-bin/carddisp.pl?gene=S100A8">https://www.genecards.org/cgi-bin/carddisp.pl?gene=S100A8</a>       |
| CXCL12    | C-X-C Motif Chemokine Ligand 12                                                    | Protein Coding | 42 | GC10M044370 | 16.75396 | <a href="https://www.genecards.org/cgi-bin/carddisp.pl?gene=CXCL12">https://www.genecards.org/cgi-bin/carddisp.pl?gene=CXCL12</a>       |
| HLA-DMA   | Major Histocompatibility Complex, Class II, DM Alpha                               | Protein Coding | 39 | GC06M066028 | 16.75094 | <a href="https://www.genecards.org/cgi-bin/carddisp.pl?gene=HLA-DMA">https://www.genecards.org/cgi-bin/carddisp.pl?gene=HLA-DMA</a>     |
| TNFRSF13C | TNF Receptor Superfamily Member 13C                                                | Protein Coding | 42 | GC22M057604 | 16.65233 | <a href="https://www.genecards.org/cgi-bin/carddisp.pl?gene=TNFRSF13C">https://www.genecards.org/cgi-bin/carddisp.pl?gene=TNFRSF13C</a> |
| MICB      | MHC Class I Polypeptide-Related Sequence B                                         | Protein Coding | 40 | GC06P083690 | 16.64386 | <a href="https://www.genecards.org/cgi-bin/carddisp.pl?gene=MICB">https://www.genecards.org/cgi-bin/carddisp.pl?gene=MICB</a>           |
| IL7       | Interleukin 7                                                                      | Protein Coding | 40 | GC08M078689 | 16.61375 | <a href="https://www.genecards.org/cgi-bin/carddisp.pl?gene=IL7">https://www.genecards.org/cgi-bin/carddisp.pl?gene=IL7</a>             |
| PIK3CG    | Phosphatidylinositol-4,5-Bisphosphate 3-Kinase Catalytic Subunit Gamma             | Protein Coding | 46 | GC07P106865 | 16.56232 | <a href="https://www.genecards.org/cgi-bin/carddisp.pl?gene=PIK3CG">https://www.genecards.org/cgi-bin/carddisp.pl?gene=PIK3CG</a>       |

|           |                                                          |                |    |             |          |                                                                                                                                         |
|-----------|----------------------------------------------------------|----------------|----|-------------|----------|-----------------------------------------------------------------------------------------------------------------------------------------|
|           |                                                          |                |    |             |          | <a href="#">bin/carddisp.pl?gene=PIK3CG</a>                                                                                             |
| HSPA5     | Heat Shock Protein Family A (Hsp70) Member 5             | Protein Coding | 46 | GC09M125234 | 16.54642 | <a href="https://www.genecards.org/cgi-bin/carddisp.pl?gene=HSPA5">https://www.genecards.org/cgi-bin/carddisp.pl?gene=HSPA5</a>         |
| CARD8     | Caspase Recruitment Domain Family Member 8               | Protein Coding | 39 | GC19M066028 | 16.53558 | <a href="https://www.genecards.org/cgi-bin/carddisp.pl?gene=CARD8">https://www.genecards.org/cgi-bin/carddisp.pl?gene=CARD8</a>         |
| TFRC      | Transferrin Receptor                                     | Protein Coding | 47 | GC03M196027 | 16.45774 | <a href="https://www.genecards.org/cgi-bin/carddisp.pl?gene=TFRC">https://www.genecards.org/cgi-bin/carddisp.pl?gene=TFRC</a>           |
| TLR9      | Toll Like Receptor 9                                     | Protein Coding | 44 | GC03M052222 | 16.39536 | <a href="https://www.genecards.org/cgi-bin/carddisp.pl?gene=TLR9">https://www.genecards.org/cgi-bin/carddisp.pl?gene=TLR9</a>           |
| JUN       | Jun Proto-Oncogene, AP-1 Transcription Factor Subunit    | Protein Coding | 46 | GC01M058780 | 16.35247 | <a href="https://www.genecards.org/cgi-bin/carddisp.pl?gene=JUN">https://www.genecards.org/cgi-bin/carddisp.pl?gene=JUN</a>             |
| ACAN      | Aggrecan                                                 | Protein Coding | 46 | GC15P118102 | 16.27408 | <a href="https://www.genecards.org/cgi-bin/carddisp.pl?gene=ACAN">https://www.genecards.org/cgi-bin/carddisp.pl?gene=ACAN</a>           |
| OSM       | Oncostatin M                                             | Protein Coding | 41 | GC22M030262 | 16.26777 | <a href="https://www.genecards.org/cgi-bin/carddisp.pl?gene=OSM">https://www.genecards.org/cgi-bin/carddisp.pl?gene=OSM</a>             |
| ADAMTS4   | ADAM Metallopeptidase With Thrombospondin Type 1 Motif 4 | Protein Coding | 42 | GC01M161184 | 16.23673 | <a href="https://www.genecards.org/cgi-bin/carddisp.pl?gene=ADAMTS4">https://www.genecards.org/cgi-bin/carddisp.pl?gene=ADAMTS4</a>     |
| IL22      | Interleukin 22                                           | Protein Coding | 40 | GC12M068248 | 16.14384 | <a href="https://www.genecards.org/cgi-bin/carddisp.pl?gene=IL22">https://www.genecards.org/cgi-bin/carddisp.pl?gene=IL22</a>           |
| PHF19     | PHD Finger Protein 19                                    | Protein Coding | 38 | GC09M120855 | 16.09995 | <a href="https://www.genecards.org/cgi-bin/carddisp.pl?gene=PHF19">https://www.genecards.org/cgi-bin/carddisp.pl?gene=PHF19</a>         |
| TRAF6     | TNF Receptor Associated Factor 6                         | Protein Coding | 44 | GC11M036467 | 15.98972 | <a href="https://www.genecards.org/cgi-bin/carddisp.pl?gene=TRAF6">https://www.genecards.org/cgi-bin/carddisp.pl?gene=TRAF6</a>         |
| RIPK1     | Receptor Interacting Serine/Threonine Kinase 1           | Protein Coding | 46 | GC06P003275 | 15.95637 | <a href="https://www.genecards.org/cgi-bin/carddisp.pl?gene=RIPK1">https://www.genecards.org/cgi-bin/carddisp.pl?gene=RIPK1</a>         |
| AP4B1-AS1 | AP4B1 Antisense RNA 1                                    | RNA Gene       | 14 | GC01P113813 | 15.88724 | <a href="https://www.genecards.org/cgi-bin/carddisp.pl?gene=AP4B1-AS1">https://www.genecards.org/cgi-bin/carddisp.pl?gene=AP4B1-AS1</a> |

|         |                                                     |                |    |             |          |                                                                                                                                     |
|---------|-----------------------------------------------------|----------------|----|-------------|----------|-------------------------------------------------------------------------------------------------------------------------------------|
| ITGB2   | Integrin Subunit Beta 2                             | Protein Coding | 49 | GC21M044885 | 15.84304 | <a href="https://www.genecards.org/cgi-bin/carddisp.pl?gene=ITGB2">https://www.genecards.org/cgi-bin/carddisp.pl?gene=ITGB2</a>     |
| RETN    | Resistin                                            | Protein Coding | 41 | GC19P007669 | 15.84085 | <a href="https://www.genecards.org/cgi-bin/carddisp.pl?gene=RETN">https://www.genecards.org/cgi-bin/carddisp.pl?gene=RETN</a>       |
| C4A     | Complement C4A (Rodgers Blood Group)                | Protein Coding | 43 | GC06P083718 | 15.77849 | <a href="https://www.genecards.org/cgi-bin/carddisp.pl?gene=C4A">https://www.genecards.org/cgi-bin/carddisp.pl?gene=C4A</a>         |
| BMP6    | Bone Morphogenetic Protein 6                        | Protein Coding | 42 | GC06P007726 | 15.76888 | <a href="https://www.genecards.org/cgi-bin/carddisp.pl?gene=BMP6">https://www.genecards.org/cgi-bin/carddisp.pl?gene=BMP6</a>       |
| MAPK8   | Mitogen-Activated Protein Kinase 8                  | Protein Coding | 47 | GC10P048306 | 15.74175 | <a href="https://www.genecards.org/cgi-bin/carddisp.pl?gene=MAPK8">https://www.genecards.org/cgi-bin/carddisp.pl?gene=MAPK8</a>     |
| CTSK    | Cathepsin K                                         | Protein Coding | 49 | GC01M152112 | 15.65356 | <a href="https://www.genecards.org/cgi-bin/carddisp.pl?gene=CTSK">https://www.genecards.org/cgi-bin/carddisp.pl?gene=CTSK</a>       |
| DHODH   | Dihydroorotate Dehydrogenase (Quinone)              | Protein Coding | 45 | GC16P072008 | 15.58341 | <a href="https://www.genecards.org/cgi-bin/carddisp.pl?gene=DHODH">https://www.genecards.org/cgi-bin/carddisp.pl?gene=DHODH</a>     |
| HLA-DMB | Major Histocompatibility Complex, Class II, DM Beta | Protein Coding | 40 | GC06M032934 | 15.56456 | <a href="https://www.genecards.org/cgi-bin/carddisp.pl?gene=HLA-DMB">https://www.genecards.org/cgi-bin/carddisp.pl?gene=HLA-DMB</a> |
| APOH    | Apolipoprotein H                                    | Protein Coding | 43 | GC17M066212 | 15.563   | <a href="https://www.genecards.org/cgi-bin/carddisp.pl?gene=APOH">https://www.genecards.org/cgi-bin/carddisp.pl?gene=APOH</a>       |
| CSF1R   | Colony Stimulating Factor 1 Receptor                | Protein Coding | 49 | GC05M150053 | 15.54609 | <a href="https://www.genecards.org/cgi-bin/carddisp.pl?gene=CSF1R">https://www.genecards.org/cgi-bin/carddisp.pl?gene=CSF1R</a>     |
| FOLR2   | Folate Receptor Beta                                | Protein Coding | 41 | GC11P072216 | 15.53863 | <a href="https://www.genecards.org/cgi-bin/carddisp.pl?gene=FOLR2">https://www.genecards.org/cgi-bin/carddisp.pl?gene=FOLR2</a>     |
| CXCL1   | C-X-C Motif Chemokine Ligand 1                      | Protein Coding | 40 | GC04P073869 | 15.52249 | <a href="https://www.genecards.org/cgi-bin/carddisp.pl?gene=CXCL1">https://www.genecards.org/cgi-bin/carddisp.pl?gene=CXCL1</a>     |
| PADI2   | Peptidyl Arginine Deiminase 2                       | Protein Coding | 41 | GC01M017066 | 15.46547 | <a href="https://www.genecards.org/cgi-bin/carddisp.pl?gene=PADI2">https://www.genecards.org/cgi-bin/carddisp.pl?gene=PADI2</a>     |
| CLEC16A | C-Type Lectin Domain Containing 16A                 | Protein Coding | 36 | GC16P010944 | 15.43327 | <a href="https://www.genecards.org/cgi-">https://www.genecards.org/cgi-</a>                                                         |

|         |                                                   |                |    |             |          |                                                                                                                                            |
|---------|---------------------------------------------------|----------------|----|-------------|----------|--------------------------------------------------------------------------------------------------------------------------------------------|
|         |                                                   |                |    |             |          | <a href="http://www.ncbi.nlm.nih.gov/ncbi/cdd/bin/carddisp.pl?gene=CLEC16A">bin/carddisp.pl?gene=CLEC16A</a>                               |
| CXCR4   | C-X-C Motif Chemokine Receptor 4                  | Protein Coding | 49 | GC02M136114 | 15.41358 | <a href="http://www.ncbi.nlm.nih.gov/ncbi/cdd/bin/carddisp.pl?gene=CXCR4">https://www.genecards.org/cgi-bin/carddisp.pl?gene=CXCR4</a>     |
| CCL20   | C-C Motif Chemokine Ligand 20                     | Protein Coding | 41 | GC02P227842 | 15.30789 | <a href="http://www.ncbi.nlm.nih.gov/ncbi/cdd/bin/carddisp.pl?gene=CCL20">https://www.genecards.org/cgi-bin/carddisp.pl?gene=CCL20</a>     |
| CR1     | Complement C3b/C4b Receptor 1 (Knops Blood Group) | Protein Coding | 45 | GC01P207496 | 15.30057 | <a href="http://www.ncbi.nlm.nih.gov/ncbi/cdd/bin/carddisp.pl?gene=CR1">https://www.genecards.org/cgi-bin/carddisp.pl?gene=CR1</a>         |
| NR4A2   | Nuclear Receptor Subfamily 4 Group A Member 2     | Protein Coding | 45 | GC02M156324 | 15.28979 | <a href="http://www.ncbi.nlm.nih.gov/ncbi/cdd/bin/carddisp.pl?gene=NR4A2">https://www.genecards.org/cgi-bin/carddisp.pl?gene=NR4A2</a>     |
| NAMPT   | Nicotinamide Phosphoribosyltransferase            | Protein Coding | 46 | GC07M106248 | 15.26194 | <a href="http://www.ncbi.nlm.nih.gov/ncbi/cdd/bin/carddisp.pl?gene=NAMPT">https://www.genecards.org/cgi-bin/carddisp.pl?gene=NAMPT</a>     |
| BTLA    | B And T Lymphocyte Associated                     | Protein Coding | 38 | GC03M112463 | 15.24469 | <a href="http://www.ncbi.nlm.nih.gov/ncbi/cdd/bin/carddisp.pl?gene=BTLA">https://www.genecards.org/cgi-bin/carddisp.pl?gene=BTLA</a>       |
| ANXA5   | Annexin A5                                        | Protein Coding | 44 | GC04M121667 | 15.18699 | <a href="http://www.ncbi.nlm.nih.gov/ncbi/cdd/bin/carddisp.pl?gene=ANXA5">https://www.genecards.org/cgi-bin/carddisp.pl?gene=ANXA5</a>     |
| PLA2G2A | Phospholipase A2 Group IIA                        | Protein Coding | 45 | GC01M019975 | 15.15402 | <a href="http://www.ncbi.nlm.nih.gov/ncbi/cdd/bin/carddisp.pl?gene=PLA2G2A">https://www.genecards.org/cgi-bin/carddisp.pl?gene=PLA2G2A</a> |
| NR3C1   | Nuclear Receptor Subfamily 3 Group C Member 1     | Protein Coding | 48 | GC05M143277 | 15.1537  | <a href="http://www.ncbi.nlm.nih.gov/ncbi/cdd/bin/carddisp.pl?gene=NR3C1">https://www.genecards.org/cgi-bin/carddisp.pl?gene=NR3C1</a>     |
| CCRL2   | C-C Motif Chemokine Receptor Like 2               | Protein Coding | 38 | GC03P046407 | 15.15227 | <a href="http://www.ncbi.nlm.nih.gov/ncbi/cdd/bin/carddisp.pl?gene=CCRL2">https://www.genecards.org/cgi-bin/carddisp.pl?gene=CCRL2</a>     |
| ELANE   | Elastase, Neutrophil Expressed                    | Protein Coding | 47 | GC19P002810 | 15.10468 | <a href="http://www.ncbi.nlm.nih.gov/ncbi/cdd/bin/carddisp.pl?gene=ELANE">https://www.genecards.org/cgi-bin/carddisp.pl?gene=ELANE</a>     |
| HFE     | Homeostatic Iron Regulator                        | Protein Coding | 44 | GC06P026087 | 15.09504 | <a href="http://www.ncbi.nlm.nih.gov/ncbi/cdd/bin/carddisp.pl?gene=HFE">https://www.genecards.org/cgi-bin/carddisp.pl?gene=HFE</a>         |
| DDX39B  | DEx-D-Box Helicase 39B                            | Protein Coding | 38 | GC06M031530 | 15.08054 | <a href="http://www.ncbi.nlm.nih.gov/ncbi/cdd/bin/carddisp.pl?gene=DDX39B">https://www.genecards.org/cgi-bin/carddisp.pl?gene=DDX39B</a>   |

|        |                                               |                |    |             |          |                                                                                                                                   |
|--------|-----------------------------------------------|----------------|----|-------------|----------|-----------------------------------------------------------------------------------------------------------------------------------|
| CRH    | Corticotropin Releasing Hormone               | Protein Coding | 42 | GC08M066176 | 15.02802 | <a href="https://www.genecards.org/cgi-bin/carddisp.pl?gene=CRH">https://www.genecards.org/cgi-bin/carddisp.pl?gene=CRH</a>       |
| CD69   | CD69 Molecule                                 | Protein Coding | 40 | GC12M021100 | 15.0032  | <a href="https://www.genecards.org/cgi-bin/carddisp.pl?gene=CD69">https://www.genecards.org/cgi-bin/carddisp.pl?gene=CD69</a>     |
| IL11   | Interleukin 11                                | Protein Coding | 39 | GC19M055364 | 14.99198 | <a href="https://www.genecards.org/cgi-bin/carddisp.pl?gene=IL11">https://www.genecards.org/cgi-bin/carddisp.pl?gene=IL11</a>     |
| PPP1CC | Protein Phosphatase 1 Catalytic Subunit Gamma | Protein Coding | 43 | GC12M110709 | 14.94761 | <a href="https://www.genecards.org/cgi-bin/carddisp.pl?gene=PPP1CC">https://www.genecards.org/cgi-bin/carddisp.pl?gene=PPP1CC</a> |
| TIMP2  | TIMP Metallopeptidase Inhibitor 2             | Protein Coding | 41 | GC17M078852 | 14.94626 | <a href="https://www.genecards.org/cgi-bin/carddisp.pl?gene=TIMP2">https://www.genecards.org/cgi-bin/carddisp.pl?gene=TIMP2</a>   |
| IL16   | Interleukin 16                                | Protein Coding | 40 | GC15P081159 | 14.94118 | <a href="https://www.genecards.org/cgi-bin/carddisp.pl?gene=IL16">https://www.genecards.org/cgi-bin/carddisp.pl?gene=IL16</a>     |
| CD4    | CD4 Molecule                                  | Protein Coding | 48 | GC12P006786 | 14.94051 | <a href="https://www.genecards.org/cgi-bin/carddisp.pl?gene=CD4">https://www.genecards.org/cgi-bin/carddisp.pl?gene=CD4</a>       |
| CILP   | Cartilage Intermediate Layer Protein          | Protein Coding | 41 | GC15M065194 | 14.93618 | <a href="https://www.genecards.org/cgi-bin/carddisp.pl?gene=CILP">https://www.genecards.org/cgi-bin/carddisp.pl?gene=CILP</a>     |
| SAA4   | Serum Amyloid A4, Constitutive                | Protein Coding | 38 | GC11M018234 | 14.90598 | <a href="https://www.genecards.org/cgi-bin/carddisp.pl?gene=SAA4">https://www.genecards.org/cgi-bin/carddisp.pl?gene=SAA4</a>     |
| CCR7   | C-C Motif Chemokine Receptor 7                | Protein Coding | 42 | GC17M042422 | 14.88598 | <a href="https://www.genecards.org/cgi-bin/carddisp.pl?gene=CCR7">https://www.genecards.org/cgi-bin/carddisp.pl?gene=CCR7</a>     |
| BST1   | Bone Marrow Stromal Cell Antigen 1            | Protein Coding | 41 | GC04P018192 | 14.84058 | <a href="https://www.genecards.org/cgi-bin/carddisp.pl?gene=BST1">https://www.genecards.org/cgi-bin/carddisp.pl?gene=BST1</a>     |
| CX3CR1 | C-X3-C Motif Chemokine Receptor 1             | Protein Coding | 42 | GC03M039279 | 14.82107 | <a href="https://www.genecards.org/cgi-bin/carddisp.pl?gene=CX3CR1">https://www.genecards.org/cgi-bin/carddisp.pl?gene=CX3CR1</a> |
| CCN6   | Cellular Communication Network Factor 6       | Protein Coding | 33 | GC06P112053 | 14.79699 | <a href="https://www.genecards.org/cgi-bin/carddisp.pl?gene=CCN6">https://www.genecards.org/cgi-bin/carddisp.pl?gene=CCN6</a>     |
| ERAP1  | Endoplasmic Reticulum Aminopeptidase 1        | Protein Coding | 44 | GC05M096760 | 14.75821 | <a href="https://www.genecards.org/cgi-">https://www.genecards.org/cgi-</a>                                                       |

|           |                                                  |                |    |             |          |                                                                                                                                              |
|-----------|--------------------------------------------------|----------------|----|-------------|----------|----------------------------------------------------------------------------------------------------------------------------------------------|
|           |                                                  |                |    |             |          | <a href="http://www.ncbi.nlm.nih.gov/ncbi/cdd/cdddisp.pl?gene=ERAP1">bin/cdddisp.pl?gene=ERAP1</a>                                           |
| CX3CL1    | C-X3-C Motif Chemokine Ligand 1                  | Protein Coding | 41 | GC16P057372 | 14.75633 | <a href="http://www.ncbi.nlm.nih.gov/ncbi/cdd/cdddisp.pl?gene=CX3CL1">https://www.ncbi.nlm.nih.gov/ncbi/cdd/cdddisp.pl?gene=CX3CL1</a>       |
| ANXA1     | Annexin A1                                       | Protein Coding | 46 | GC09P073151 | 14.74983 | <a href="http://www.ncbi.nlm.nih.gov/ncbi/cdd/cdddisp.pl?gene=ANXA1">https://www.ncbi.nlm.nih.gov/ncbi/cdd/cdddisp.pl?gene=ANXA1</a>         |
| TNFRSF6B  | TNF Receptor Superfamily Member 6b               | Protein Coding | 41 | GC20P063696 | 14.70909 | <a href="http://www.ncbi.nlm.nih.gov/ncbi/cdd/cdddisp.pl?gene=TNFRSF6B">https://www.ncbi.nlm.nih.gov/ncbi/cdd/cdddisp.pl?gene=TNFRSF6B</a>   |
| MAP3K8    | Mitogen-Activated Protein Kinase Kinase Kinase 8 | Protein Coding | 44 | GC10P030510 | 14.62116 | <a href="http://www.ncbi.nlm.nih.gov/ncbi/cdd/cdddisp.pl?gene=MAP3K8">https://www.ncbi.nlm.nih.gov/ncbi/cdd/cdddisp.pl?gene=MAP3K8</a>       |
| LRRK2     | Leucine Rich Repeat Kinase 2                     | Protein Coding | 47 | GC12P040196 | 14.61646 | <a href="http://www.ncbi.nlm.nih.gov/ncbi/cdd/cdddisp.pl?gene=LRRK2">https://www.ncbi.nlm.nih.gov/ncbi/cdd/cdddisp.pl?gene=LRRK2</a>         |
| CCL4      | C-C Motif Chemokine Ligand 4                     | Protein Coding | 37 | GC17P036103 | 14.42948 | <a href="http://www.ncbi.nlm.nih.gov/ncbi/cdd/cdddisp.pl?gene=CCL4">https://www.ncbi.nlm.nih.gov/ncbi/cdd/cdddisp.pl?gene=CCL4</a>           |
| ALOX5     | Arachidonate 5-Lipoxygenase                      | Protein Coding | 46 | GC10P045374 | 14.36469 | <a href="http://www.ncbi.nlm.nih.gov/ncbi/cdd/cdddisp.pl?gene=ALOX5">https://www.ncbi.nlm.nih.gov/ncbi/cdd/cdddisp.pl?gene=ALOX5</a>         |
| TNFRSF10A | TNF Receptor Superfamily Member 10a              | Protein Coding | 43 | GC08M023190 | 14.36466 | <a href="http://www.ncbi.nlm.nih.gov/ncbi/cdd/cdddisp.pl?gene=TNFRSF10A">https://www.ncbi.nlm.nih.gov/ncbi/cdd/cdddisp.pl?gene=TNFRSF10A</a> |
| ANKH      | ANKH Inorganic Pyrophosphate Transport Regulator | Protein Coding | 41 | GC05M014720 | 14.35605 | <a href="http://www.ncbi.nlm.nih.gov/ncbi/cdd/cdddisp.pl?gene=ANKH">https://www.ncbi.nlm.nih.gov/ncbi/cdd/cdddisp.pl?gene=ANKH</a>           |
| CXCR5     | C-X-C Motif Chemokine Receptor 5                 | Protein Coding | 38 | GC11P118924 | 14.33774 | <a href="http://www.ncbi.nlm.nih.gov/ncbi/cdd/cdddisp.pl?gene=CXCR5">https://www.ncbi.nlm.nih.gov/ncbi/cdd/cdddisp.pl?gene=CXCR5</a>         |
| NFKB1     | Nuclear Factor Kappa B Subunit 1                 | Protein Coding | 49 | GC04P102501 | 14.24818 | <a href="http://www.ncbi.nlm.nih.gov/ncbi/cdd/cdddisp.pl?gene=NFKB1">https://www.ncbi.nlm.nih.gov/ncbi/cdd/cdddisp.pl?gene=NFKB1</a>         |
| CXCL9     | C-X-C Motif Chemokine Ligand 9                   | Protein Coding | 37 | GC04M076001 | 14.21463 | <a href="http://www.ncbi.nlm.nih.gov/ncbi/cdd/cdddisp.pl?gene=CXCL9">https://www.ncbi.nlm.nih.gov/ncbi/cdd/cdddisp.pl?gene=CXCL9</a>         |
| SH2D1A    | SH2 Domain Containing 1A                         | Protein Coding | 44 | GC0XP124227 | 14.19325 | <a href="http://www.ncbi.nlm.nih.gov/ncbi/cdd/cdddisp.pl?gene=SH2D1A">https://www.ncbi.nlm.nih.gov/ncbi/cdd/cdddisp.pl?gene=SH2D1A</a>       |



|        |                                   |                |    |             |          |                                                                                                                                   |
|--------|-----------------------------------|----------------|----|-------------|----------|-----------------------------------------------------------------------------------------------------------------------------------|
| PRRC2A | Proline Rich Coiled-Coil 2A       | Protein Coding | 33 | GC06P083697 | 14.17116 | <a href="https://www.genecards.org/cgi-bin/carddisp.pl?gene=PRRC2A">https://www.genecards.org/cgi-bin/carddisp.pl?gene=PRRC2A</a> |
| CD86   | CD86 Molecule                     | Protein Coding | 42 | GC03P122055 | 14.17063 | <a href="https://www.genecards.org/cgi-bin/carddisp.pl?gene=CD86">https://www.genecards.org/cgi-bin/carddisp.pl?gene=CD86</a>     |
| DEK    | DEK Proto-Oncogene                | Protein Coding | 40 | GC06M018224 | 14.14616 | <a href="https://www.genecards.org/cgi-bin/carddisp.pl?gene=DEK">https://www.genecards.org/cgi-bin/carddisp.pl?gene=DEK</a>       |
| IL32   | Interleukin 32                    | Protein Coding | 37 | GC16P011732 | 14.11727 | <a href="https://www.genecards.org/cgi-bin/carddisp.pl?gene=IL32">https://www.genecards.org/cgi-bin/carddisp.pl?gene=IL32</a>     |
| SELL   | Selectin L                        | Protein Coding | 42 | GC01M169690 | 14.06612 | <a href="https://www.genecards.org/cgi-bin/carddisp.pl?gene=SELL">https://www.genecards.org/cgi-bin/carddisp.pl?gene=SELL</a>     |
| IL18R1 | Interleukin 18 Receptor 1         | Protein Coding | 41 | GC02P102311 | 14.04528 | <a href="https://www.genecards.org/cgi-bin/carddisp.pl?gene=IL18R1">https://www.genecards.org/cgi-bin/carddisp.pl?gene=IL18R1</a> |
| ENO1   | Enolase 1                         | Protein Coding | 45 | GC01M008861 | 14.01664 | <a href="https://www.genecards.org/cgi-bin/carddisp.pl?gene=ENO1">https://www.genecards.org/cgi-bin/carddisp.pl?gene=ENO1</a>     |
| LIF    | LIF Interleukin 6 Family Cytokine | Protein Coding | 40 | GC22M030240 | 13.95521 | <a href="https://www.genecards.org/cgi-bin/carddisp.pl?gene=LIF">https://www.genecards.org/cgi-bin/carddisp.pl?gene=LIF</a>       |
| CTSB   | Cathepsin B                       | Protein Coding | 50 | GC08M011842 | 13.92418 | <a href="https://www.genecards.org/cgi-bin/carddisp.pl?gene=CTSB">https://www.genecards.org/cgi-bin/carddisp.pl?gene=CTSB</a>     |
| CXCL5  | C-X-C Motif Chemokine Ligand 5    | Protein Coding | 39 | GC04M073995 | 13.89449 | <a href="https://www.genecards.org/cgi-bin/carddisp.pl?gene=CXCL5">https://www.genecards.org/cgi-bin/carddisp.pl?gene=CXCL5</a>   |
| CAST   | Calpastatin                       | Protein Coding | 44 | GC05P096525 | 13.8069  | <a href="https://www.genecards.org/cgi-bin/carddisp.pl?gene=CAST">https://www.genecards.org/cgi-bin/carddisp.pl?gene=CAST</a>     |
| IFNGR1 | Interferon Gamma Receptor 1       | Protein Coding | 48 | GC06M137197 | 13.67502 | <a href="https://www.genecards.org/cgi-bin/carddisp.pl?gene=IFNGR1">https://www.genecards.org/cgi-bin/carddisp.pl?gene=IFNGR1</a> |
| HTRA1  | HtrA Serine Peptidase 1           | Protein Coding | 44 | GC10P122461 | 13.67453 | <a href="https://www.genecards.org/cgi-bin/carddisp.pl?gene=HTRA1">https://www.genecards.org/cgi-bin/carddisp.pl?gene=HTRA1</a>   |
| SYVN1  | Synoviolin 1                      | Protein Coding | 40 | GC11M089758 | 13.67208 | <a href="https://www.genecards.org/cgi-bin/carddisp.pl?gene=SYVN1">https://www.genecards.org/cgi-bin/carddisp.pl?gene=SYVN1</a>   |

|         |                                                         |                |    |             |          |                                                                                                                                            |
|---------|---------------------------------------------------------|----------------|----|-------------|----------|--------------------------------------------------------------------------------------------------------------------------------------------|
|         |                                                         |                |    |             |          | <a href="http://www.ncbi.nlm.nih.gov/ncbi/cdd/bin/carddisp.pl?gene=SYVN1">bin/carddisp.pl?gene=SYVN1</a>                                   |
| GNAQ    | G Protein Subunit Alpha Q                               | Protein Coding | 48 | GC09M077716 | 13.6626  | <a href="http://www.ncbi.nlm.nih.gov/ncbi/cdd/bin/carddisp.pl?gene=GNAQ">https://www.genecards.org/cgi-bin/carddisp.pl?gene=GNAQ</a>       |
| CTSG    | Cathepsin G                                             | Protein Coding | 44 | GC14M024573 | 13.63105 | <a href="http://www.ncbi.nlm.nih.gov/ncbi/cdd/bin/carddisp.pl?gene=CTSG">https://www.genecards.org/cgi-bin/carddisp.pl?gene=CTSG</a>       |
| MMP14   | Matrix Metalloproteinase 14                             | Protein Coding | 49 | GC14P032700 | 13.60407 | <a href="http://www.ncbi.nlm.nih.gov/ncbi/cdd/bin/carddisp.pl?gene=MMP14">https://www.genecards.org/cgi-bin/carddisp.pl?gene=MMP14</a>     |
| HAS1    | Hyaluronan Synthase 1                                   | Protein Coding | 38 | GC19M066232 | 13.36506 | <a href="http://www.ncbi.nlm.nih.gov/ncbi/cdd/bin/carddisp.pl?gene=HAS1">https://www.genecards.org/cgi-bin/carddisp.pl?gene=HAS1</a>       |
| CR2     | Complement C3d Receptor 2                               | Protein Coding | 45 | GC01P207454 | 13.35006 | <a href="http://www.ncbi.nlm.nih.gov/ncbi/cdd/bin/carddisp.pl?gene=CR2">https://www.genecards.org/cgi-bin/carddisp.pl?gene=CR2</a>         |
| TNFRSF9 | TNF Receptor Superfamily Member 9                       | Protein Coding | 41 | GC01M007915 | 13.33525 | <a href="http://www.ncbi.nlm.nih.gov/ncbi/cdd/bin/carddisp.pl?gene=TNFRSF9">https://www.genecards.org/cgi-bin/carddisp.pl?gene=TNFRSF9</a> |
| SAA2    | Serum Amyloid A2                                        | Protein Coding | 34 | GC11M018238 | 13.30334 | <a href="http://www.ncbi.nlm.nih.gov/ncbi/cdd/bin/carddisp.pl?gene=SAA2">https://www.genecards.org/cgi-bin/carddisp.pl?gene=SAA2</a>       |
| ABCB1   | ATP Binding Cassette Subfamily B Member 1               | Protein Coding | 49 | GC07M087504 | 13.1671  | <a href="http://www.ncbi.nlm.nih.gov/ncbi/cdd/bin/carddisp.pl?gene=ABCB1">https://www.genecards.org/cgi-bin/carddisp.pl?gene=ABCB1</a>     |
| IKBKB   | Inhibitor Of Nuclear Factor Kappa B Kinase Subunit Beta | Protein Coding | 50 | GC08P042271 | 13.14229 | <a href="http://www.ncbi.nlm.nih.gov/ncbi/cdd/bin/carddisp.pl?gene=IKBKB">https://www.genecards.org/cgi-bin/carddisp.pl?gene=IKBKB</a>     |
| SRF     | Serum Response Factor                                   | Protein Coding | 41 | GC06P043171 | 13.09601 | <a href="http://www.ncbi.nlm.nih.gov/ncbi/cdd/bin/carddisp.pl?gene=SRF">https://www.genecards.org/cgi-bin/carddisp.pl?gene=SRF</a>         |
| NPSR1   | Neuropeptide S Receptor 1                               | Protein Coding | 40 | GC07P034664 | 13.078   | <a href="http://www.ncbi.nlm.nih.gov/ncbi/cdd/bin/carddisp.pl?gene=NPSR1">https://www.genecards.org/cgi-bin/carddisp.pl?gene=NPSR1</a>     |
| ITGAL   | Integrin Subunit Alpha L                                | Protein Coding | 45 | GC16P030472 | 13.05874 | <a href="http://www.ncbi.nlm.nih.gov/ncbi/cdd/bin/carddisp.pl?gene=ITGAL">https://www.genecards.org/cgi-bin/carddisp.pl?gene=ITGAL</a>     |
| LTBR    | Lymphotoxin Beta Receptor                               | Protein Coding | 40 | GC12P006375 | 13.0238  | <a href="http://www.ncbi.nlm.nih.gov/ncbi/cdd/bin/carddisp.pl?gene=LTBR">https://www.genecards.org/cgi-bin/carddisp.pl?gene=LTBR</a>       |

|         |                                               |                |    |             |          |                                                                                                                                     |
|---------|-----------------------------------------------|----------------|----|-------------|----------|-------------------------------------------------------------------------------------------------------------------------------------|
| IL18BP  | Interleukin 18 Binding Protein                | Protein Coding | 40 | GC11P071998 | 13.02169 | <a href="https://www.genecards.org/cgi-bin/carddisp.pl?gene=IL18BP">https://www.genecards.org/cgi-bin/carddisp.pl?gene=IL18BP</a>   |
| JAM3    | Junctional Adhesion Molecule 3                | Protein Coding | 42 | GC11P134068 | 12.9921  | <a href="https://www.genecards.org/cgi-bin/carddisp.pl?gene=JAM3">https://www.genecards.org/cgi-bin/carddisp.pl?gene=JAM3</a>       |
| PRSS2   | Serine Protease 2                             | Protein Coding | 39 | GC07P148358 | 12.98954 | <a href="https://www.genecards.org/cgi-bin/carddisp.pl?gene=PRSS2">https://www.genecards.org/cgi-bin/carddisp.pl?gene=PRSS2</a>     |
| HGD     | Homogentisate 1,2-Dioxygenase                 | Protein Coding | 42 | GC03M120628 | 12.93446 | <a href="https://www.genecards.org/cgi-bin/carddisp.pl?gene=HGD">https://www.genecards.org/cgi-bin/carddisp.pl?gene=HGD</a>         |
| TNFSF14 | TNF Superfamily Member 14                     | Protein Coding | 40 | GC19M006663 | 12.90687 | <a href="https://www.genecards.org/cgi-bin/carddisp.pl?gene=TNFSF14">https://www.genecards.org/cgi-bin/carddisp.pl?gene=TNFSF14</a> |
| CDH11   | Cadherin 11                                   | Protein Coding | 46 | GC16M064943 | 12.90221 | <a href="https://www.genecards.org/cgi-bin/carddisp.pl?gene=CDH11">https://www.genecards.org/cgi-bin/carddisp.pl?gene=CDH11</a>     |
| LECT2   | Leukocyte Cell Derived Chemotaxin 2           | Protein Coding | 35 | GC05M135922 | 12.90004 | <a href="https://www.genecards.org/cgi-bin/carddisp.pl?gene=LECT2">https://www.genecards.org/cgi-bin/carddisp.pl?gene=LECT2</a>     |
| IL12B   | Interleukin 12B                               | Protein Coding | 42 | GC05M159314 | 12.84875 | <a href="https://www.genecards.org/cgi-bin/carddisp.pl?gene=IL12B">https://www.genecards.org/cgi-bin/carddisp.pl?gene=IL12B</a>     |
| H19     | H19 Imprinted Maternally Expressed Transcript | RNA Gene       | 28 | GC11M001995 | 12.76628 | <a href="https://www.genecards.org/cgi-bin/carddisp.pl?gene=H19">https://www.genecards.org/cgi-bin/carddisp.pl?gene=H19</a>         |
| PRKCD   | Protein Kinase C Delta                        | Protein Coding | 50 | GC03P053156 | 12.68714 | <a href="https://www.genecards.org/cgi-bin/carddisp.pl?gene=PRKCD">https://www.genecards.org/cgi-bin/carddisp.pl?gene=PRKCD</a>     |
| HOTAIR  | HOX Transcript Antisense RNA                  | RNA Gene       | 25 | GC12M053962 | 12.66906 | <a href="https://www.genecards.org/cgi-bin/carddisp.pl?gene=HOTAIR">https://www.genecards.org/cgi-bin/carddisp.pl?gene=HOTAIR</a>   |
| IRAK1   | Interleukin 1 Receptor Associated Kinase 1    | Protein Coding | 47 | GC0XM154010 | 12.56267 | <a href="https://www.genecards.org/cgi-bin/carddisp.pl?gene=IRAK1">https://www.genecards.org/cgi-bin/carddisp.pl?gene=IRAK1</a>     |
| SIGLEC1 | Sialic Acid Binding Ig Like Lectin 1          | Protein Coding | 40 | GC20M003686 | 12.41731 | <a href="https://www.genecards.org/cgi-bin/carddisp.pl?gene=SIGLEC1">https://www.genecards.org/cgi-bin/carddisp.pl?gene=SIGLEC1</a> |
| ZNF334  | Zinc Finger Protein 334                       | Protein Coding | 34 | GC20M046462 | 12.35258 | <a href="https://www.genecards.org/cgi-bin/carddisp.pl?gene=ZNF334">https://www.genecards.org/cgi-bin/carddisp.pl?gene=ZNF334</a>   |

|         |                                                        |                |    |             |          |                                                                                                                                            |
|---------|--------------------------------------------------------|----------------|----|-------------|----------|--------------------------------------------------------------------------------------------------------------------------------------------|
|         |                                                        |                |    |             |          | <a href="http://www.ncbi.nlm.nih.gov/ncbi/cdd/bin/carddisp.pl?gene=ZNF334">bin/carddisp.pl?gene=ZNF334</a>                                 |
| IL36RN  | Interleukin 36 Receptor Antagonist                     | Protein Coding | 39 | GC02P122459 | 12.33298 | <a href="http://www.ncbi.nlm.nih.gov/ncbi/cdd/bin/carddisp.pl?gene=IL36RN">https://www.genecards.org/cgi-bin/carddisp.pl?gene=IL36RN</a>   |
| PLB1    | Phospholipase B1                                       | Protein Coding | 36 | GC02P028460 | 12.27903 | <a href="http://www.ncbi.nlm.nih.gov/ncbi/cdd/bin/carddisp.pl?gene=PLB1">https://www.genecards.org/cgi-bin/carddisp.pl?gene=PLB1</a>       |
| PLA2G10 | Phospholipase A2 Group X                               | Protein Coding | 42 | GC16M014672 | 12.27668 | <a href="http://www.ncbi.nlm.nih.gov/ncbi/cdd/bin/carddisp.pl?gene=PLA2G10">https://www.genecards.org/cgi-bin/carddisp.pl?gene=PLA2G10</a> |
| VDR     | Vitamin D Receptor                                     | Protein Coding | 49 | GC12M047841 | 12.25633 | <a href="http://www.ncbi.nlm.nih.gov/ncbi/cdd/bin/carddisp.pl?gene=VDR">https://www.genecards.org/cgi-bin/carddisp.pl?gene=VDR</a>         |
| TAP2    | Transporter 2, ATP Binding Cassette Subfamily B Member | Protein Coding | 43 | GC06M032821 | 12.21779 | <a href="http://www.ncbi.nlm.nih.gov/ncbi/cdd/bin/carddisp.pl?gene=TAP2">https://www.genecards.org/cgi-bin/carddisp.pl?gene=TAP2</a>       |
| TNFRSF4 | TNF Receptor Superfamily Member 4                      | Protein Coding | 40 | GC01M001211 | 12.18949 | <a href="http://www.ncbi.nlm.nih.gov/ncbi/cdd/bin/carddisp.pl?gene=TNFRSF4">https://www.genecards.org/cgi-bin/carddisp.pl?gene=TNFRSF4</a> |
| IL26    | Interleukin 26                                         | Protein Coding | 34 | GC12M068201 | 12.08641 | <a href="http://www.ncbi.nlm.nih.gov/ncbi/cdd/bin/carddisp.pl?gene=IL26">https://www.genecards.org/cgi-bin/carddisp.pl?gene=IL26</a>       |
| IL22RA1 | Interleukin 22 Receptor Subunit Alpha 1                | Protein Coding | 38 | GC01M024119 | 11.95796 | <a href="http://www.ncbi.nlm.nih.gov/ncbi/cdd/bin/carddisp.pl?gene=IL22RA1">https://www.genecards.org/cgi-bin/carddisp.pl?gene=IL22RA1</a> |
| HLA-A   | Major Histocompatibility Complex, Class I, A           | Protein Coding | 45 | GC06P083654 | 11.8462  | <a href="http://www.ncbi.nlm.nih.gov/ncbi/cdd/bin/carddisp.pl?gene=HLA-A">https://www.genecards.org/cgi-bin/carddisp.pl?gene=HLA-A</a>     |
| IL1RAP  | Interleukin 1 Receptor Accessory Protein               | Protein Coding | 43 | GC03P190514 | 11.84372 | <a href="http://www.ncbi.nlm.nih.gov/ncbi/cdd/bin/carddisp.pl?gene=IL1RAP">https://www.genecards.org/cgi-bin/carddisp.pl?gene=IL1RAP</a>   |
| HAPLN1  | Hyaluronan And Proteoglycan Link Protein 1             | Protein Coding | 41 | GC05M083637 | 11.79408 | <a href="http://www.ncbi.nlm.nih.gov/ncbi/cdd/bin/carddisp.pl?gene=HAPLN1">https://www.genecards.org/cgi-bin/carddisp.pl?gene=HAPLN1</a>   |
| IL17B   | Interleukin 17B                                        | Protein Coding | 38 | GC05M149371 | 11.7879  | <a href="http://www.ncbi.nlm.nih.gov/ncbi/cdd/bin/carddisp.pl?gene=IL17B">https://www.genecards.org/cgi-bin/carddisp.pl?gene=IL17B</a>     |
| CSF3    | Colony Stimulating Factor 3                            | Protein Coding | 38 | GC17P040015 | 11.78711 | <a href="http://www.ncbi.nlm.nih.gov/ncbi/cdd/bin/carddisp.pl?gene=CSF3">https://www.genecards.org/cgi-bin/carddisp.pl?gene=CSF3</a>       |

|         |                                                        |                |    |             |          |                                                                                                                                     |
|---------|--------------------------------------------------------|----------------|----|-------------|----------|-------------------------------------------------------------------------------------------------------------------------------------|
| SUPT20H | SPT20 Homolog, SAGA Complex Component                  | Protein Coding | 35 | GC13M037009 | 11.74313 | <a href="https://www.genecards.org/cgi-bin/carddisp.pl?gene=SUPT20H">https://www.genecards.org/cgi-bin/carddisp.pl?gene=SUPT20H</a> |
| MUC1    | Mucin 1, Cell Surface Associated                       | Protein Coding | 47 | GC01M155185 | 11.64341 | <a href="https://www.genecards.org/cgi-bin/carddisp.pl?gene=MUC1">https://www.genecards.org/cgi-bin/carddisp.pl?gene=MUC1</a>       |
| GCH1    | GTP Cyclohydrolase 1                                   | Protein Coding | 46 | GC14M054842 | 11.55303 | <a href="https://www.genecards.org/cgi-bin/carddisp.pl?gene=GCH1">https://www.genecards.org/cgi-bin/carddisp.pl?gene=GCH1</a>       |
| C5      | Complement C5                                          | Protein Coding | 45 | GC09M120933 | 11.51311 | <a href="https://www.genecards.org/cgi-bin/carddisp.pl?gene=C5">https://www.genecards.org/cgi-bin/carddisp.pl?gene=C5</a>           |
| MALAT1  | Metastasis Associated Lung Adenocarcinoma Transcript 1 | RNA Gene       | 24 | GC11P069984 | 11.41199 | <a href="https://www.genecards.org/cgi-bin/carddisp.pl?gene=MALAT1">https://www.genecards.org/cgi-bin/carddisp.pl?gene=MALAT1</a>   |
| C4B     | Complement C4B (Chido Blood Group)                     | Protein Coding | 43 | GC06P032014 | 11.3774  | <a href="https://www.genecards.org/cgi-bin/carddisp.pl?gene=C4B">https://www.genecards.org/cgi-bin/carddisp.pl?gene=C4B</a>         |
| IL12A   | Interleukin 12A                                        | Protein Coding | 42 | GC03P159988 | 11.37363 | <a href="https://www.genecards.org/cgi-bin/carddisp.pl?gene=IL12A">https://www.genecards.org/cgi-bin/carddisp.pl?gene=IL12A</a>     |
| CCL18   | C-C Motif Chemokine Ligand 18                          | Protein Coding | 34 | GC17P036064 | 11.30127 | <a href="https://www.genecards.org/cgi-bin/carddisp.pl?gene=CCL18">https://www.genecards.org/cgi-bin/carddisp.pl?gene=CCL18</a>     |
| CASP10  | Caspase 10                                             | Protein Coding | 46 | GC02P201182 | 11.29622 | <a href="https://www.genecards.org/cgi-bin/carddisp.pl?gene=CASP10">https://www.genecards.org/cgi-bin/carddisp.pl?gene=CASP10</a>   |
| CCR3    | C-C Motif Chemokine Receptor 3                         | Protein Coding | 44 | GC03P046771 | 11.23719 | <a href="https://www.genecards.org/cgi-bin/carddisp.pl?gene=CCR3">https://www.genecards.org/cgi-bin/carddisp.pl?gene=CCR3</a>       |
| ELMO2   | Engulfment And Cell Motility 2                         | Protein Coding | 41 | GC20M046366 | 11.21355 | <a href="https://www.genecards.org/cgi-bin/carddisp.pl?gene=ELMO2">https://www.genecards.org/cgi-bin/carddisp.pl?gene=ELMO2</a>     |
| CALCA   | Calcitonin Related Polypeptide Alpha                   | Protein Coding | 42 | GC11M014945 | 11.21201 | <a href="https://www.genecards.org/cgi-bin/carddisp.pl?gene=CALCA">https://www.genecards.org/cgi-bin/carddisp.pl?gene=CALCA</a>     |
| RASGRP1 | RAS Guanyl Releasing Protein 1                         | Protein Coding | 46 | GC15M038488 | 11.18871 | <a href="https://www.genecards.org/cgi-bin/carddisp.pl?gene=RASGRP1">https://www.genecards.org/cgi-bin/carddisp.pl?gene=RASGRP1</a> |
| SFTPD   | Surfactant Protein D                                   | Protein Coding | 42 | GC10M079937 | 11.13456 | <a href="https://www.genecards.org/cgi-">https://www.genecards.org/cgi-</a>                                                         |

|        |                                        |                |    |             |          |                                                                                                                                   |
|--------|----------------------------------------|----------------|----|-------------|----------|-----------------------------------------------------------------------------------------------------------------------------------|
|        |                                        |                |    |             |          | <a href="#">bin/carddisp.pl?gene=SFTPD</a>                                                                                        |
| PSMB9  | Proteasome 20S Subunit Beta 9          | Protein Coding | 45 | GC06P083730 | 11.08946 | <a href="https://www.genecards.org/cgi-bin/carddisp.pl?gene=PSMB9">https://www.genecards.org/cgi-bin/carddisp.pl?gene=PSMB9</a>   |
| MVK    | Mevalonate Kinase                      | Protein Coding | 46 | GC12P109573 | 11.01072 | <a href="https://www.genecards.org/cgi-bin/carddisp.pl?gene=MVK">https://www.genecards.org/cgi-bin/carddisp.pl?gene=MVK</a>       |
| WAS    | WASP Actin Nucleation Promoting Factor | Protein Coding | 46 | GC0XP048676 | 11.00922 | <a href="https://www.genecards.org/cgi-bin/carddisp.pl?gene=WAS">https://www.genecards.org/cgi-bin/carddisp.pl?gene=WAS</a>       |
| IL17F  | Interleukin 17F                        | Protein Coding | 41 | GC06M066315 | 10.98434 | <a href="https://www.genecards.org/cgi-bin/carddisp.pl?gene=IL17F">https://www.genecards.org/cgi-bin/carddisp.pl?gene=IL17F</a>   |
| ZFAS1  | ZNFX1 Antisense RNA 1                  | RNA Gene       | 20 | GC20P049276 | 10.97871 | <a href="https://www.genecards.org/cgi-bin/carddisp.pl?gene=ZFAS1">https://www.genecards.org/cgi-bin/carddisp.pl?gene=ZFAS1</a>   |
| SNHG29 | Small Nucleolar RNA Host Gene 29       | RNA Gene       | 18 | GC17P017038 | 10.97871 | <a href="https://www.genecards.org/cgi-bin/carddisp.pl?gene=SNHG29">https://www.genecards.org/cgi-bin/carddisp.pl?gene=SNHG29</a> |
| GSTM1  | Glutathione S-Transferase Mu 1         | Protein Coding | 40 | GC01P109687 | 10.92024 | <a href="https://www.genecards.org/cgi-bin/carddisp.pl?gene=GSTM1">https://www.genecards.org/cgi-bin/carddisp.pl?gene=GSTM1</a>   |
| CCL21  | C-C Motif Chemokine Ligand 21          | Protein Coding | 40 | GC09M034709 | 10.91666 | <a href="https://www.genecards.org/cgi-bin/carddisp.pl?gene=CCL21">https://www.genecards.org/cgi-bin/carddisp.pl?gene=CCL21</a>   |
| GZMB   | Granzyme B                             | Protein Coding | 45 | GC14M024630 | 10.86115 | <a href="https://www.genecards.org/cgi-bin/carddisp.pl?gene=GZMB">https://www.genecards.org/cgi-bin/carddisp.pl?gene=GZMB</a>     |
| INS    | Insulin                                | Protein Coding | 45 | GC11M002159 | 10.84706 | <a href="https://www.genecards.org/cgi-bin/carddisp.pl?gene=INS">https://www.genecards.org/cgi-bin/carddisp.pl?gene=INS</a>       |
| MMP7   | Matrix Metalloproteinase 7             | Protein Coding | 46 | GC11M102425 | 10.82843 | <a href="https://www.genecards.org/cgi-bin/carddisp.pl?gene=MMP7">https://www.genecards.org/cgi-bin/carddisp.pl?gene=MMP7</a>     |
| UCA1   | Urothelial Cancer Associated 1         | RNA Gene       | 22 | GC19P015828 | 10.79663 | <a href="https://www.genecards.org/cgi-bin/carddisp.pl?gene=UCA1">https://www.genecards.org/cgi-bin/carddisp.pl?gene=UCA1</a>     |
| IGKC   | Immunoglobulin Kappa Constant          | Protein Coding | 34 | GC02M090885 | 10.79204 | <a href="https://www.genecards.org/cgi-bin/carddisp.pl?gene=IGKC">https://www.genecards.org/cgi-bin/carddisp.pl?gene=IGKC</a>     |

|        |                                                                        |                |    |             |          |                                                                                                                                   |
|--------|------------------------------------------------------------------------|----------------|----|-------------|----------|-----------------------------------------------------------------------------------------------------------------------------------|
| IL33   | Interleukin 33                                                         | Protein Coding | 37 | GC09P006572 | 10.77691 | <a href="https://www.genecards.org/cgi-bin/carddisp.pl?gene=IL33">https://www.genecards.org/cgi-bin/carddisp.pl?gene=IL33</a>     |
| RAG2   | Recombination Activating 2                                             | Protein Coding | 41 | GC11M036575 | 10.72379 | <a href="https://www.genecards.org/cgi-bin/carddisp.pl?gene=RAG2">https://www.genecards.org/cgi-bin/carddisp.pl?gene=RAG2</a>     |
| PIK3CD | Phosphatidylinositol-4,5-Bisphosphate 3-Kinase Catalytic Subunit Delta | Protein Coding | 51 | GC01P009629 | 10.71171 | <a href="https://www.genecards.org/cgi-bin/carddisp.pl?gene=PIK3CD">https://www.genecards.org/cgi-bin/carddisp.pl?gene=PIK3CD</a> |
| HMGB2  | High Mobility Group Box 2                                              | Protein Coding | 40 | GC04M173331 | 10.70827 | <a href="https://www.genecards.org/cgi-bin/carddisp.pl?gene=HMGB2">https://www.genecards.org/cgi-bin/carddisp.pl?gene=HMGB2</a>   |
| TLR3   | Toll Like Receptor 3                                                   | Protein Coding | 49 | GC04P186059 | 10.48099 | <a href="https://www.genecards.org/cgi-bin/carddisp.pl?gene=TLR3">https://www.genecards.org/cgi-bin/carddisp.pl?gene=TLR3</a>     |
| STAT1  | Signal Transducer And Activator Of Transcription 1                     | Protein Coding | 50 | GC02M190908 | 10.46094 | <a href="https://www.genecards.org/cgi-bin/carddisp.pl?gene=STAT1">https://www.genecards.org/cgi-bin/carddisp.pl?gene=STAT1</a>   |
| ICOS   | Inducible T Cell Costimulator                                          | Protein Coding | 42 | GC02P203937 | 10.37501 | <a href="https://www.genecards.org/cgi-bin/carddisp.pl?gene=ICOS">https://www.genecards.org/cgi-bin/carddisp.pl?gene=ICOS</a>     |
| B2M    | Beta-2-Microglobulin                                                   | Protein Coding | 46 | GC15P044711 | 10.33602 | <a href="https://www.genecards.org/cgi-bin/carddisp.pl?gene=B2M">https://www.genecards.org/cgi-bin/carddisp.pl?gene=B2M</a>       |
| TPMT   | Thiopurine S-Methyltransferase                                         | Protein Coding | 45 | GC06M018128 | 10.27546 | <a href="https://www.genecards.org/cgi-bin/carddisp.pl?gene=TPMT">https://www.genecards.org/cgi-bin/carddisp.pl?gene=TPMT</a>     |
| MYD88  | MYD88 Innate Immune Signal Transduction Adaptor                        | Protein Coding | 48 | GC03P038139 | 10.18017 | <a href="https://www.genecards.org/cgi-bin/carddisp.pl?gene=MYD88">https://www.genecards.org/cgi-bin/carddisp.pl?gene=MYD88</a>   |
| BTK    | Bruton Tyrosine Kinase                                                 | Protein Coding | 50 | GC0XM101349 | 10.1462  | <a href="https://www.genecards.org/cgi-bin/carddisp.pl?gene=BTK">https://www.genecards.org/cgi-bin/carddisp.pl?gene=BTK</a>       |
| TP53   | Tumor Protein P53                                                      | Protein Coding | 50 | GC17M007661 | 10.10886 | <a href="https://www.genecards.org/cgi-bin/carddisp.pl?gene=TP53">https://www.genecards.org/cgi-bin/carddisp.pl?gene=TP53</a>     |
| HPRT1  | Hypoxanthine Phosphoribosyltransferase 1                               | Protein Coding | 45 | GC0XP134460 | 10.08449 | <a href="https://www.genecards.org/cgi-bin/carddisp.pl?gene=HPRT1">https://www.genecards.org/cgi-bin/carddisp.pl?gene=HPRT1</a>   |
| LTF    | Lactotransferrin                                                       | Protein Coding | 44 | GC03M046435 | 10.04714 | <a href="https://www.genecards.org/cgi-">https://www.genecards.org/cgi-</a>                                                       |

|        |                                              |                |    |             |          |                                                                                                                                   |
|--------|----------------------------------------------|----------------|----|-------------|----------|-----------------------------------------------------------------------------------------------------------------------------------|
|        |                                              |                |    |             |          | <a href="#">bin/carddisp.pl?gene=LTF</a>                                                                                          |
| PRL    | Prolactin                                    | Protein Coding | 41 | GC06M022287 | 9.99847  | <a href="https://www.genecards.org/cgi-bin/carddisp.pl?gene=PRL">https://www.genecards.org/cgi-bin/carddisp.pl?gene=PRL</a>       |
| ACTA2  | Actin Alpha 2, Smooth Muscle                 | Protein Coding | 45 | GC10M088935 | 9.997743 | <a href="https://www.genecards.org/cgi-bin/carddisp.pl?gene=ACTA2">https://www.genecards.org/cgi-bin/carddisp.pl?gene=ACTA2</a>   |
| ANGPT2 | Angiopoietin 2                               | Protein Coding | 45 | GC08M006499 | 9.826532 | <a href="https://www.genecards.org/cgi-bin/carddisp.pl?gene=ANGPT2">https://www.genecards.org/cgi-bin/carddisp.pl?gene=ANGPT2</a> |
| VWF    | Von Willebrand Factor                        | Protein Coding | 47 | GC12M005917 | 9.81198  | <a href="https://www.genecards.org/cgi-bin/carddisp.pl?gene=VWF">https://www.genecards.org/cgi-bin/carddisp.pl?gene=VWF</a>       |
| PTGES  | Prostaglandin E Synthase                     | Protein Coding | 40 | GC09M129738 | 9.793758 | <a href="https://www.genecards.org/cgi-bin/carddisp.pl?gene=PTGES">https://www.genecards.org/cgi-bin/carddisp.pl?gene=PTGES</a>   |
| ADA    | Adenosine Deaminase                          | Protein Coding | 49 | GC20M044620 | 9.783412 | <a href="https://www.genecards.org/cgi-bin/carddisp.pl?gene=ADA">https://www.genecards.org/cgi-bin/carddisp.pl?gene=ADA</a>       |
| MMP19  | Matrix Metalloproteinase 19                  | Protein Coding | 47 | GC12M055835 | 9.769567 | <a href="https://www.genecards.org/cgi-bin/carddisp.pl?gene=MMP19">https://www.genecards.org/cgi-bin/carddisp.pl?gene=MMP19</a>   |
| PTPRC  | Protein Tyrosine Phosphatase Receptor Type C | Protein Coding | 49 | GC01P198607 | 9.747452 | <a href="https://www.genecards.org/cgi-bin/carddisp.pl?gene=PTPRC">https://www.genecards.org/cgi-bin/carddisp.pl?gene=PTPRC</a>   |
| SNHG28 | Small Nucleolar RNA Host Gene 28             | RNA Gene       | 17 | GC01M159834 | 9.636161 | <a href="https://www.genecards.org/cgi-bin/carddisp.pl?gene=SNHG28">https://www.genecards.org/cgi-bin/carddisp.pl?gene=SNHG28</a> |
| IL3    | Interleukin 3                                | Protein Coding | 41 | GC05P132060 | 9.605054 | <a href="https://www.genecards.org/cgi-bin/carddisp.pl?gene=IL3">https://www.genecards.org/cgi-bin/carddisp.pl?gene=IL3</a>       |
| ACE    | Angiotensin I Converting Enzyme              | Protein Coding | 49 | GC17P063477 | 9.555857 | <a href="https://www.genecards.org/cgi-bin/carddisp.pl?gene=ACE">https://www.genecards.org/cgi-bin/carddisp.pl?gene=ACE</a>       |
| GPT    | Glutamic--Pyruvic Transaminase               | Protein Coding | 40 | GC08P144502 | 9.512686 | <a href="https://www.genecards.org/cgi-bin/carddisp.pl?gene=GPT">https://www.genecards.org/cgi-bin/carddisp.pl?gene=GPT</a>       |
| FBN1   | Fibrillin 1                                  | Protein Coding | 45 | GC15M048408 | 9.487437 | <a href="https://www.genecards.org/cgi-bin/carddisp.pl?gene=FBN1">https://www.genecards.org/cgi-bin/carddisp.pl?gene=FBN1</a>     |



|          |                                                        |                |    |             |          |                                                                                                                                       |
|----------|--------------------------------------------------------|----------------|----|-------------|----------|---------------------------------------------------------------------------------------------------------------------------------------|
| ETS1     | ETS Proto-Oncogene 1, Transcription Factor             | Protein Coding | 45 | GC11M128458 | 9.44219  | <a href="https://www.genecards.org/cgi-bin/carddisp.pl?gene=ETS1">https://www.genecards.org/cgi-bin/carddisp.pl?gene=ETS1</a>         |
| TNFSF4   | TNF Superfamily Member 4                               | Protein Coding | 39 | GC01M173183 | 9.435301 | <a href="https://www.genecards.org/cgi-bin/carddisp.pl?gene=TNFSF4">https://www.genecards.org/cgi-bin/carddisp.pl?gene=TNFSF4</a>     |
| TREX1    | Three Prime Repair Exonuclease 1                       | Protein Coding | 40 | GC03P048977 | 9.427769 | <a href="https://www.genecards.org/cgi-bin/carddisp.pl?gene=TREX1">https://www.genecards.org/cgi-bin/carddisp.pl?gene=TREX1</a>       |
| CFI      | Complement Factor I                                    | Protein Coding | 45 | GC04M109732 | 9.424962 | <a href="https://www.genecards.org/cgi-bin/carddisp.pl?gene=CFI">https://www.genecards.org/cgi-bin/carddisp.pl?gene=CFI</a>           |
| CXCL13   | C-X-C Motif Chemokine Ligand 13                        | Protein Coding | 40 | GC04P077511 | 9.318037 | <a href="https://www.genecards.org/cgi-bin/carddisp.pl?gene=CXCL13">https://www.genecards.org/cgi-bin/carddisp.pl?gene=CXCL13</a>     |
| CD80     | CD80 Molecule                                          | Protein Coding | 40 | GC03M119524 | 9.295761 | <a href="https://www.genecards.org/cgi-bin/carddisp.pl?gene=CD80">https://www.genecards.org/cgi-bin/carddisp.pl?gene=CD80</a>         |
| HAMP     | Hepcidin Antimicrobial Peptide                         | Protein Coding | 42 | GC19P066535 | 9.292628 | <a href="https://www.genecards.org/cgi-bin/carddisp.pl?gene=HAMP">https://www.genecards.org/cgi-bin/carddisp.pl?gene=HAMP</a>         |
| TAP1     | Transporter 1, ATP Binding Cassette Subfamily B Member | Protein Coding | 45 | GC06M066023 | 9.286879 | <a href="https://www.genecards.org/cgi-bin/carddisp.pl?gene=TAP1">https://www.genecards.org/cgi-bin/carddisp.pl?gene=TAP1</a>         |
| DNASE1   | Deoxyribonuclease 1                                    | Protein Coding | 42 | GC16P003611 | 9.285975 | <a href="https://www.genecards.org/cgi-bin/carddisp.pl?gene=DNASE1">https://www.genecards.org/cgi-bin/carddisp.pl?gene=DNASE1</a>     |
| MYC      | MYC Proto-Oncogene, BHLH Transcription Factor          | Protein Coding | 49 | GC08P127735 | 9.263966 | <a href="https://www.genecards.org/cgi-bin/carddisp.pl?gene=MYC">https://www.genecards.org/cgi-bin/carddisp.pl?gene=MYC</a>           |
| ICOSLG   | Inducible T Cell Costimulator Ligand                   | Protein Coding | 39 | GC21M044222 | 9.258209 | <a href="https://www.genecards.org/cgi-bin/carddisp.pl?gene=ICOSLG">https://www.genecards.org/cgi-bin/carddisp.pl?gene=ICOSLG</a>     |
| NLRP12   | NLR Family Pyrin Domain Containing 12                  | Protein Coding | 42 | GC19M053793 | 9.176813 | <a href="https://www.genecards.org/cgi-bin/carddisp.pl?gene=NLRP12">https://www.genecards.org/cgi-bin/carddisp.pl?gene=NLRP12</a>     |
| BIRC5    | Baculoviral IAP Repeat Containing 5                    | Protein Coding | 45 | GC17P078214 | 9.157294 | <a href="https://www.genecards.org/cgi-bin/carddisp.pl?gene=BIRC5">https://www.genecards.org/cgi-bin/carddisp.pl?gene=BIRC5</a>       |
| DNASE1L3 | Deoxyribonuclease 1 Like 3                             | Protein Coding | 42 | GC03M058192 | 9.154231 | <a href="https://www.genecards.org/cgi-bin/carddisp.pl?gene=DNASE1L3">https://www.genecards.org/cgi-bin/carddisp.pl?gene=DNASE1L3</a> |

|            |                                                   |                |    |             |          |                                                                                                                                           |
|------------|---------------------------------------------------|----------------|----|-------------|----------|-------------------------------------------------------------------------------------------------------------------------------------------|
|            |                                                   |                |    |             |          | bin/carddisp.pl?gene=DNASE1L3                                                                                                             |
| TNFSF12    | TNF Superfamily Member 12                         | Protein Coding | 39 | GC17P011166 | 9.109595 | <a href="https://www.genecards.org/cgi-bin/carddisp.pl?gene=TNFSF12">https://www.genecards.org/cgi-bin/carddisp.pl?gene=TNFSF12</a>       |
| FBXL19-AS1 | FBXL19 Antisense RNA 1                            | RNA Gene       | 19 | GC16M037214 | 9.105168 | <a href="https://www.genecards.org/cgi-bin/carddisp.pl?gene=FBXL19-AS1">https://www.genecards.org/cgi-bin/carddisp.pl?gene=FBXL19-AS1</a> |
| CASP1      | Caspase 1                                         | Protein Coding | 48 | GC11M105025 | 9.031401 | <a href="https://www.genecards.org/cgi-bin/carddisp.pl?gene=CASP1">https://www.genecards.org/cgi-bin/carddisp.pl?gene=CASP1</a>           |
| MMP10      | Matrix Metalloproteinase 10                       | Protein Coding | 44 | GC11M102770 | 8.983663 | <a href="https://www.genecards.org/cgi-bin/carddisp.pl?gene=MMP10">https://www.genecards.org/cgi-bin/carddisp.pl?gene=MMP10</a>           |
| TYMS       | Thymidylate Synthetase                            | Protein Coding | 46 | GC18P000657 | 8.978648 | <a href="https://www.genecards.org/cgi-bin/carddisp.pl?gene=TYMS">https://www.genecards.org/cgi-bin/carddisp.pl?gene=TYMS</a>             |
| TLR5       | Toll Like Receptor 5                              | Protein Coding | 45 | GC01M223109 | 8.953194 | <a href="https://www.genecards.org/cgi-bin/carddisp.pl?gene=TLR5">https://www.genecards.org/cgi-bin/carddisp.pl?gene=TLR5</a>             |
| RELA       | RELA Proto-Oncogene, NF-KB Subunit                | Protein Coding | 49 | GC11M065653 | 8.933392 | <a href="https://www.genecards.org/cgi-bin/carddisp.pl?gene=RELA">https://www.genecards.org/cgi-bin/carddisp.pl?gene=RELA</a>             |
| PXK        | PX Domain Containing Serine/Threonine Kinase Like | Protein Coding | 37 | GC03P058333 | 8.857019 | <a href="https://www.genecards.org/cgi-bin/carddisp.pl?gene=PXK">https://www.genecards.org/cgi-bin/carddisp.pl?gene=PXK</a>               |
| PON1       | Paraoxonase 1                                     | Protein Coding | 46 | GC07M095297 | 8.855175 | <a href="https://www.genecards.org/cgi-bin/carddisp.pl?gene=PON1">https://www.genecards.org/cgi-bin/carddisp.pl?gene=PON1</a>             |
| SLC26A2    | Solute Carrier Family 26 Member 2                 | Protein Coding | 44 | GC05P149944 | 8.78796  | <a href="https://www.genecards.org/cgi-bin/carddisp.pl?gene=SLC26A2">https://www.genecards.org/cgi-bin/carddisp.pl?gene=SLC26A2</a>       |
| IFIH1      | Interferon Induced With Helicase C Domain 1       | Protein Coding | 45 | GC02M162267 | 8.767211 | <a href="https://www.genecards.org/cgi-bin/carddisp.pl?gene=IFIH1">https://www.genecards.org/cgi-bin/carddisp.pl?gene=IFIH1</a>           |
| CCN2       | Cellular Communication Network Factor 2           | Protein Coding | 37 | GC06M131948 | 8.727752 | <a href="https://www.genecards.org/cgi-bin/carddisp.pl?gene=CCN2">https://www.genecards.org/cgi-bin/carddisp.pl?gene=CCN2</a>             |
| BMP2       | Bone Morphogenetic Protein 2                      | Protein Coding | 44 | GC20P006767 | 8.629303 | <a href="https://www.genecards.org/cgi-bin/carddisp.pl?gene=BMP2">https://www.genecards.org/cgi-bin/carddisp.pl?gene=BMP2</a>             |

|           |                                                  |                |    |             |          |                                                                                                                                         |
|-----------|--------------------------------------------------|----------------|----|-------------|----------|-----------------------------------------------------------------------------------------------------------------------------------------|
| AIRE      | Autoimmune Regulator                             | Protein Coding | 44 | GC21P044285 | 8.624952 | <a href="https://www.genecards.org/cgi-bin/carddisp.pl?gene=AIRE">https://www.genecards.org/cgi-bin/carddisp.pl?gene=AIRE</a>           |
| GHRL      | Ghrelin And Obestatin Prepropeptide              | Protein Coding | 42 | GC03M010285 | 8.599505 | <a href="https://www.genecards.org/cgi-bin/carddisp.pl?gene=GHRL">https://www.genecards.org/cgi-bin/carddisp.pl?gene=GHRL</a>           |
| PRF1      | Perforin 1                                       | Protein Coding | 44 | GC10M070597 | 8.59799  | <a href="https://www.genecards.org/cgi-bin/carddisp.pl?gene=PRF1">https://www.genecards.org/cgi-bin/carddisp.pl?gene=PRF1</a>           |
| TRAF3IP2  | TRAF3 Interacting Protein 2                      | Protein Coding | 44 | GC06M111555 | 8.52512  | <a href="https://www.genecards.org/cgi-bin/carddisp.pl?gene=TRAF3IP2">https://www.genecards.org/cgi-bin/carddisp.pl?gene=TRAF3IP2</a>   |
| TF        | Transferrin                                      | Protein Coding | 48 | GC03P134296 | 8.517799 | <a href="https://www.genecards.org/cgi-bin/carddisp.pl?gene=TF">https://www.genecards.org/cgi-bin/carddisp.pl?gene=TF</a>               |
| TNFRSF13B | TNF Receptor Superfamily Member 13B              | Protein Coding | 44 | GC17M016929 | 8.511412 | <a href="https://www.genecards.org/cgi-bin/carddisp.pl?gene=TNFRSF13B">https://www.genecards.org/cgi-bin/carddisp.pl?gene=TNFRSF13B</a> |
| RAG1      | Recombination Activating 1                       | Protein Coding | 45 | GC11P036538 | 8.504069 | <a href="https://www.genecards.org/cgi-bin/carddisp.pl?gene=RAG1">https://www.genecards.org/cgi-bin/carddisp.pl?gene=RAG1</a>           |
| PPARG     | Peroxisome Proliferator Activated Receptor Gamma | Protein Coding | 50 | GC03P012287 | 8.483553 | <a href="https://www.genecards.org/cgi-bin/carddisp.pl?gene=PPARG">https://www.genecards.org/cgi-bin/carddisp.pl?gene=PPARG</a>         |
| KIT       | KIT Proto-Oncogene, Receptor Tyrosine Kinase     | Protein Coding | 50 | GC04P054657 | 8.483397 | <a href="https://www.genecards.org/cgi-bin/carddisp.pl?gene=KIT">https://www.genecards.org/cgi-bin/carddisp.pl?gene=KIT</a>             |
| MIF-AS1   | MIF Antisense RNA 1                              | RNA Gene       | 15 | GC22M023893 | 8.450796 | <a href="https://www.genecards.org/cgi-bin/carddisp.pl?gene=MIF-AS1">https://www.genecards.org/cgi-bin/carddisp.pl?gene=MIF-AS1</a>     |
| CD58      | CD58 Molecule                                    | Protein Coding | 39 | GC01M116514 | 8.422945 | <a href="https://www.genecards.org/cgi-bin/carddisp.pl?gene=CD58">https://www.genecards.org/cgi-bin/carddisp.pl?gene=CD58</a>           |
| ERAP2     | Endoplasmic Reticulum Aminopeptidase 2           | Protein Coding | 39 | GC05P096875 | 8.396812 | <a href="https://www.genecards.org/cgi-bin/carddisp.pl?gene=ERAP2">https://www.genecards.org/cgi-bin/carddisp.pl?gene=ERAP2</a>         |
| COL11A1   | Collagen Type XI Alpha 1 Chain                   | Protein Coding | 42 | GC01M102876 | 8.360456 | <a href="https://www.genecards.org/cgi-bin/carddisp.pl?gene=COL11A1">https://www.genecards.org/cgi-bin/carddisp.pl?gene=COL11A1</a>     |
| PTH       | Parathyroid Hormone                              | Protein Coding | 44 | GC11M013492 | 8.356497 | <a href="https://www.genecards.org/cgi-">https://www.genecards.org/cgi-</a>                                                             |

|        |                                                  |                |    |             |          |                                                                                                                                          |
|--------|--------------------------------------------------|----------------|----|-------------|----------|------------------------------------------------------------------------------------------------------------------------------------------|
|        |                                                  |                |    |             |          | <a href="http://www.ncbi.nlm.nih.gov/ncbi/cdd/bin/carddisp.pl?gene=PTH">bin/carddisp.pl?gene=PTH</a>                                     |
| BANK1  | B Cell Scaffold Protein With Ankyrin Repeats 1   | Protein Coding | 37 | GC04P101411 | 8.329576 | <a href="http://www.ncbi.nlm.nih.gov/ncbi/cdd/bin/carddisp.pl?gene=BANK1">https://www.genecards.org/cgi-bin/carddisp.pl?gene=BANK1</a>   |
| HGF    | Hepatocyte Growth Factor                         | Protein Coding | 49 | GC07M081699 | 8.308176 | <a href="http://www.ncbi.nlm.nih.gov/ncbi/cdd/bin/carddisp.pl?gene=HGF">https://www.genecards.org/cgi-bin/carddisp.pl?gene=HGF</a>       |
| BCL2   | BCL2 Apoptosis Regulator                         | Protein Coding | 48 | GC18M063123 | 8.289707 | <a href="http://www.ncbi.nlm.nih.gov/ncbi/cdd/bin/carddisp.pl?gene=BCL2">https://www.genecards.org/cgi-bin/carddisp.pl?gene=BCL2</a>     |
| TFR2   | Transferrin Receptor 2                           | Protein Coding | 44 | GC07M100620 | 8.28105  | <a href="http://www.ncbi.nlm.nih.gov/ncbi/cdd/bin/carddisp.pl?gene=TFR2">https://www.genecards.org/cgi-bin/carddisp.pl?gene=TFR2</a>     |
| ENG    | Endoglin                                         | Protein Coding | 46 | GC09M127815 | 8.271666 | <a href="http://www.ncbi.nlm.nih.gov/ncbi/cdd/bin/carddisp.pl?gene=ENG">https://www.genecards.org/cgi-bin/carddisp.pl?gene=ENG</a>       |
| IRF4   | Interferon Regulatory Factor 4                   | Protein Coding | 42 | GC06P000391 | 8.261472 | <a href="http://www.ncbi.nlm.nih.gov/ncbi/cdd/bin/carddisp.pl?gene=IRF4">https://www.genecards.org/cgi-bin/carddisp.pl?gene=IRF4</a>     |
| UBE2L3 | Ubiquitin Conjugating Enzyme E2 L3               | Protein Coding | 43 | GC22P021549 | 8.220354 | <a href="http://www.ncbi.nlm.nih.gov/ncbi/cdd/bin/carddisp.pl?gene=UBE2L3">https://www.genecards.org/cgi-bin/carddisp.pl?gene=UBE2L3</a> |
| P4HA2  | Prolyl 4-Hydroxylase Subunit Alpha 2             | Protein Coding | 45 | GC05M132191 | 8.194843 | <a href="http://www.ncbi.nlm.nih.gov/ncbi/cdd/bin/carddisp.pl?gene=P4HA2">https://www.genecards.org/cgi-bin/carddisp.pl?gene=P4HA2</a>   |
| TREM1  | Triggering Receptor Expressed On Myeloid Cells 1 | Protein Coding | 40 | GC06M041267 | 8.190091 | <a href="http://www.ncbi.nlm.nih.gov/ncbi/cdd/bin/carddisp.pl?gene=TREM1">https://www.genecards.org/cgi-bin/carddisp.pl?gene=TREM1</a>   |
| LRBA   | LPS Responsive Beige-Like Anchor Protein         | Protein Coding | 40 | GC04M150264 | 8.170541 | <a href="http://www.ncbi.nlm.nih.gov/ncbi/cdd/bin/carddisp.pl?gene=LRBA">https://www.genecards.org/cgi-bin/carddisp.pl?gene=LRBA</a>     |
| LBR    | Lamin B Receptor                                 | Protein Coding | 45 | GC01M225401 | 8.169616 | <a href="http://www.ncbi.nlm.nih.gov/ncbi/cdd/bin/carddisp.pl?gene=LBR">https://www.genecards.org/cgi-bin/carddisp.pl?gene=LBR</a>       |
| LEP    | Leptin                                           | Protein Coding | 45 | GC07P128241 | 8.160183 | <a href="http://www.ncbi.nlm.nih.gov/ncbi/cdd/bin/carddisp.pl?gene=LEP">https://www.genecards.org/cgi-bin/carddisp.pl?gene=LEP</a>       |
| LCE3C  | Late Cornified Envelope 3C                       | Protein Coding | 27 | GC01P152600 | 8.146751 | <a href="http://www.ncbi.nlm.nih.gov/ncbi/cdd/bin/carddisp.pl?gene=LCE3C">https://www.genecards.org/cgi-bin/carddisp.pl?gene=LCE3C</a>   |

|         |                                               |                |    |             |          |                                                                                                                                     |
|---------|-----------------------------------------------|----------------|----|-------------|----------|-------------------------------------------------------------------------------------------------------------------------------------|
| FGFR1   | Fibroblast Growth Factor Receptor 1           | Protein Coding | 52 | GC08M038400 | 8.140184 | <a href="https://www.genecards.org/cgi-bin/carddisp.pl?gene=FGFR1">https://www.genecards.org/cgi-bin/carddisp.pl?gene=FGFR1</a>     |
| CYP2C9  | Cytochrome P450 Family 2 Subfamily C Member 9 | Protein Coding | 46 | GC10P094938 | 8.136342 | <a href="https://www.genecards.org/cgi-bin/carddisp.pl?gene=CYP2C9">https://www.genecards.org/cgi-bin/carddisp.pl?gene=CYP2C9</a>   |
| LCE3B   | Late Cornified Envelope 3B                    | Protein Coding | 25 | GC01P152613 | 8.135294 | <a href="https://www.genecards.org/cgi-bin/carddisp.pl?gene=LCE3B">https://www.genecards.org/cgi-bin/carddisp.pl?gene=LCE3B</a>     |
| MECP2   | Methyl-CpG Binding Protein 2                  | Protein Coding | 44 | GC0XM154021 | 8.128887 | <a href="https://www.genecards.org/cgi-bin/carddisp.pl?gene=MECP2">https://www.genecards.org/cgi-bin/carddisp.pl?gene=MECP2</a>     |
| PLA2G4A | Phospholipase A2 Group IVA                    | Protein Coding | 47 | GC01P186798 | 8.127202 | <a href="https://www.genecards.org/cgi-bin/carddisp.pl?gene=PLA2G4A">https://www.genecards.org/cgi-bin/carddisp.pl?gene=PLA2G4A</a> |
| IL6-AS1 | IL6 Antisense RNA 1                           | RNA Gene       | 12 | GC07M022728 | 8.120523 | <a href="https://www.genecards.org/cgi-bin/carddisp.pl?gene=IL6-AS1">https://www.genecards.org/cgi-bin/carddisp.pl?gene=IL6-AS1</a> |
| COL1A1  | Collagen Type I Alpha 1 Chain                 | Protein Coding | 48 | GC17M050183 | 8.073373 | <a href="https://www.genecards.org/cgi-bin/carddisp.pl?gene=COL1A1">https://www.genecards.org/cgi-bin/carddisp.pl?gene=COL1A1</a>   |
| ESR1    | Estrogen Receptor 1                           | Protein Coding | 50 | GC06P151656 | 8.039339 | <a href="https://www.genecards.org/cgi-bin/carddisp.pl?gene=ESR1">https://www.genecards.org/cgi-bin/carddisp.pl?gene=ESR1</a>       |
| GC      | GC Vitamin D Binding Protein                  | Protein Coding | 44 | GC04M071741 | 8.032885 | <a href="https://www.genecards.org/cgi-bin/carddisp.pl?gene=GC">https://www.genecards.org/cgi-bin/carddisp.pl?gene=GC</a>           |
| CD14    | CD14 Molecule                                 | Protein Coding | 44 | GC05M140631 | 8.00914  | <a href="https://www.genecards.org/cgi-bin/carddisp.pl?gene=CD14">https://www.genecards.org/cgi-bin/carddisp.pl?gene=CD14</a>       |
| IL4R    | Interleukin 4 Receptor                        | Protein Coding | 46 | GC16P027992 | 7.993469 | <a href="https://www.genecards.org/cgi-bin/carddisp.pl?gene=IL4R">https://www.genecards.org/cgi-bin/carddisp.pl?gene=IL4R</a>       |
| JAZF1   | JAZF Zinc Finger 1                            | Protein Coding | 37 | GC07M027830 | 7.976355 | <a href="https://www.genecards.org/cgi-bin/carddisp.pl?gene=JAZF1">https://www.genecards.org/cgi-bin/carddisp.pl?gene=JAZF1</a>     |
| PRG4    | Proteoglycan 4                                | Protein Coding | 41 | GC01P186296 | 7.910367 | <a href="https://www.genecards.org/cgi-bin/carddisp.pl?gene=PRG4">https://www.genecards.org/cgi-bin/carddisp.pl?gene=PRG4</a>       |
| SMAD3   | SMAD Family Member 3                          | Protein Coding | 48 | GC15P067063 | 7.910223 | <a href="https://www.genecards.org/cgi-bin/carddisp.pl?gene=SMAD3">https://www.genecards.org/cgi-bin/carddisp.pl?gene=SMAD3</a>     |

|          |                                                      |                |    |             |          |                                                                                                                                              |
|----------|------------------------------------------------------|----------------|----|-------------|----------|----------------------------------------------------------------------------------------------------------------------------------------------|
|          |                                                      |                |    |             |          | <a href="http://www.ncbi.nlm.nih.gov/ncbi/cdd/bin/carddisp.pl?gene=SMAD3">bin/carddisp.pl?gene=SMAD3</a>                                     |
| ADA2     | Adenosine Deaminase 2                                | Protein Coding | 33 | GC22M017197 | 7.857287 | <a href="http://www.ncbi.nlm.nih.gov/ncbi/cdd/bin/carddisp.pl?gene=ADA2">https://www.genecards.org/cgi-bin/carddisp.pl?gene=ADA2</a>         |
| SERPINE1 | Serpin Family E Member 1                             | Protein Coding | 48 | GC07P101127 | 7.806879 | <a href="http://www.ncbi.nlm.nih.gov/ncbi/cdd/bin/carddisp.pl?gene=SERPINE1">https://www.genecards.org/cgi-bin/carddisp.pl?gene=SERPINE1</a> |
| DKK1     | Dickkopf WNT Signaling Pathway Inhibitor 1           | Protein Coding | 43 | GC10P052314 | 7.773871 | <a href="http://www.ncbi.nlm.nih.gov/ncbi/cdd/bin/carddisp.pl?gene=DKK1">https://www.genecards.org/cgi-bin/carddisp.pl?gene=DKK1</a>         |
| NFKB2    | Nuclear Factor Kappa B Subunit 2                     | Protein Coding | 49 | GC10P102394 | 7.757963 | <a href="http://www.ncbi.nlm.nih.gov/ncbi/cdd/bin/carddisp.pl?gene=NFKB2">https://www.genecards.org/cgi-bin/carddisp.pl?gene=NFKB2</a>       |
| HLA-DRA  | Major Histocompatibility Complex, Class II, DR Alpha | Protein Coding | 45 | GC06P032439 | 7.756925 | <a href="http://www.ncbi.nlm.nih.gov/ncbi/cdd/bin/carddisp.pl?gene=HLA-DRA">https://www.genecards.org/cgi-bin/carddisp.pl?gene=HLA-DRA</a>   |
| HJV      | Hemojuvelin BMP Co-Receptor                          | Protein Coding | 35 | GC01M146846 | 7.719653 | <a href="http://www.ncbi.nlm.nih.gov/ncbi/cdd/bin/carddisp.pl?gene=HJV">https://www.genecards.org/cgi-bin/carddisp.pl?gene=HJV</a>           |
| DPP4     | Dipeptidyl Peptidase 4                               | Protein Coding | 48 | GC02M161992 | 7.705974 | <a href="http://www.ncbi.nlm.nih.gov/ncbi/cdd/bin/carddisp.pl?gene=DPP4">https://www.genecards.org/cgi-bin/carddisp.pl?gene=DPP4</a>         |
| IL5      | Interleukin 5                                        | Protein Coding | 43 | GC05M132541 | 7.693769 | <a href="http://www.ncbi.nlm.nih.gov/ncbi/cdd/bin/carddisp.pl?gene=IL5">https://www.genecards.org/cgi-bin/carddisp.pl?gene=IL5</a>           |
| PRKCQ    | Protein Kinase C Theta                               | Protein Coding | 47 | GC10M006526 | 7.68408  | <a href="http://www.ncbi.nlm.nih.gov/ncbi/cdd/bin/carddisp.pl?gene=PRKCQ">https://www.genecards.org/cgi-bin/carddisp.pl?gene=PRKCQ</a>       |
| NAT2     | N-Acetyltransferase 2                                | Protein Coding | 41 | GC08P018391 | 7.676551 | <a href="http://www.ncbi.nlm.nih.gov/ncbi/cdd/bin/carddisp.pl?gene=NAT2">https://www.genecards.org/cgi-bin/carddisp.pl?gene=NAT2</a>         |
| FGF2     | Fibroblast Growth Factor 2                           | Protein Coding | 44 | GC04P122826 | 7.660335 | <a href="http://www.ncbi.nlm.nih.gov/ncbi/cdd/bin/carddisp.pl?gene=FGF2">https://www.genecards.org/cgi-bin/carddisp.pl?gene=FGF2</a>         |
| DCLRE1C  | DNA Cross-Link Repair 1C                             | Protein Coding | 42 | GC10M014897 | 7.638009 | <a href="http://www.ncbi.nlm.nih.gov/ncbi/cdd/bin/carddisp.pl?gene=DCLRE1C">https://www.genecards.org/cgi-bin/carddisp.pl?gene=DCLRE1C</a>   |
| NOS3     | Nitric Oxide Synthase 3                              | Protein Coding | 49 | GC07P150990 | 7.567809 | <a href="http://www.ncbi.nlm.nih.gov/ncbi/cdd/bin/carddisp.pl?gene=NOS3">https://www.genecards.org/cgi-bin/carddisp.pl?gene=NOS3</a>         |

|         |                                              |                |    |             |          |                                                                                                                                     |
|---------|----------------------------------------------|----------------|----|-------------|----------|-------------------------------------------------------------------------------------------------------------------------------------|
| MS4A1   | Membrane Spanning 4-Domains A1               | Protein Coding | 45 | GC11P060512 | 7.549659 | <a href="https://www.genecards.org/cgi-bin/carddisp.pl?gene=MS4A1">https://www.genecards.org/cgi-bin/carddisp.pl?gene=MS4A1</a>     |
| HLA-G   | Major Histocompatibility Complex, Class I, G | Protein Coding | 42 | GC06P083645 | 7.544229 | <a href="https://www.genecards.org/cgi-bin/carddisp.pl?gene=HLA-G">https://www.genecards.org/cgi-bin/carddisp.pl?gene=HLA-G</a>     |
| CCN1    | Cellular Communication Network Factor 1      | Protein Coding | 29 | GC01P085581 | 7.528159 | <a href="https://www.genecards.org/cgi-bin/carddisp.pl?gene=CCN1">https://www.genecards.org/cgi-bin/carddisp.pl?gene=CCN1</a>       |
| CD8A    | CD8a Molecule                                | Protein Coding | 44 | GC02M086784 | 7.513724 | <a href="https://www.genecards.org/cgi-bin/carddisp.pl?gene=CD8A">https://www.genecards.org/cgi-bin/carddisp.pl?gene=CD8A</a>       |
| TH      | Tyrosine Hydroxylase                         | Protein Coding | 49 | GC11M002163 | 7.499124 | <a href="https://www.genecards.org/cgi-bin/carddisp.pl?gene=TH">https://www.genecards.org/cgi-bin/carddisp.pl?gene=TH</a>           |
| COL11A2 | Collagen Type XI Alpha 2 Chain               | Protein Coding | 42 | GC06M033162 | 7.498151 | <a href="https://www.genecards.org/cgi-bin/carddisp.pl?gene=COL11A2">https://www.genecards.org/cgi-bin/carddisp.pl?gene=COL11A2</a> |
| HIF1A   | Hypoxia Inducible Factor 1 Subunit Alpha     | Protein Coding | 45 | GC14P061695 | 7.455225 | <a href="https://www.genecards.org/cgi-bin/carddisp.pl?gene=HIF1A">https://www.genecards.org/cgi-bin/carddisp.pl?gene=HIF1A</a>     |
| IGF1    | Insulin Like Growth Factor 1                 | Protein Coding | 46 | GC12M102395 | 7.454007 | <a href="https://www.genecards.org/cgi-bin/carddisp.pl?gene=IGF1">https://www.genecards.org/cgi-bin/carddisp.pl?gene=IGF1</a>       |
| POMC    | Proopiomelanocortin                          | Protein Coding | 46 | GC02M025160 | 7.414512 | <a href="https://www.genecards.org/cgi-bin/carddisp.pl?gene=POMC">https://www.genecards.org/cgi-bin/carddisp.pl?gene=POMC</a>       |
| ADRB2   | Adrenoceptor Beta 2                          | Protein Coding | 47 | GC05P148825 | 7.395474 | <a href="https://www.genecards.org/cgi-bin/carddisp.pl?gene=ADRB2">https://www.genecards.org/cgi-bin/carddisp.pl?gene=ADRB2</a>     |
| MMP15   | Matrix Metalloproteinase 15                  | Protein Coding | 44 | GC16P058025 | 7.291743 | <a href="https://www.genecards.org/cgi-bin/carddisp.pl?gene=MMP15">https://www.genecards.org/cgi-bin/carddisp.pl?gene=MMP15</a>     |
| FCER2   | Fc Epsilon Receptor II                       | Protein Coding | 42 | GC19M007689 | 7.287531 | <a href="https://www.genecards.org/cgi-bin/carddisp.pl?gene=FCER2">https://www.genecards.org/cgi-bin/carddisp.pl?gene=FCER2</a>     |
| CDK6    | Cyclin Dependent Kinase 6                    | Protein Coding | 50 | GC07M092604 | 7.238047 | <a href="https://www.genecards.org/cgi-bin/carddisp.pl?gene=CDK6">https://www.genecards.org/cgi-bin/carddisp.pl?gene=CDK6</a>       |
| XDH     | Xanthine Dehydrogenase                       | Protein Coding | 45 | GC02M031334 | 7.18777  | <a href="https://www.genecards.org/cgi-bin/carddisp.pl?gene=XDH">https://www.genecards.org/cgi-bin/carddisp.pl?gene=XDH</a>         |

|        |                                                    |                |    |             |          |                                                                                                                                    |
|--------|----------------------------------------------------|----------------|----|-------------|----------|------------------------------------------------------------------------------------------------------------------------------------|
|        |                                                    |                |    |             |          | <a href="http://www.ncbi.nlm.nih.gov/ncbi-bin/caddisp.pl?gene=XDH">bin/caddisp.pl?gene=XDH</a>                                     |
| IGHG2  | Immunoglobulin Heavy Constant Gamma 2 (G2m Marker) | Protein Coding | 30 | GC14M112709 | 7.169412 | <a href="http://www.ncbi.nlm.nih.gov/ncbi-bin/caddisp.pl?gene=IGHG2">https://www.genecards.org/cgi-bin/caddisp.pl?gene=IGHG2</a>   |
| IL10RB | Interleukin 10 Receptor Subunit Beta               | Protein Coding | 42 | GC21P033266 | 7.163627 | <a href="http://www.ncbi.nlm.nih.gov/ncbi-bin/caddisp.pl?gene=IL10RB">https://www.genecards.org/cgi-bin/caddisp.pl?gene=IL10RB</a> |
| TYK2   | Tyrosine Kinase 2                                  | Protein Coding | 50 | GC19M010350 | 7.14624  | <a href="http://www.ncbi.nlm.nih.gov/ncbi-bin/caddisp.pl?gene=TYK2">https://www.genecards.org/cgi-bin/caddisp.pl?gene=TYK2</a>     |
| IL1RL1 | Interleukin 1 Receptor Like 1                      | Protein Coding | 40 | GC02P102294 | 7.121621 | <a href="http://www.ncbi.nlm.nih.gov/ncbi-bin/caddisp.pl?gene=IL1RL1">https://www.genecards.org/cgi-bin/caddisp.pl?gene=IL1RL1</a> |
| FN1    | Fibronectin 1                                      | Protein Coding | 48 | GC02M215360 | 7.120795 | <a href="http://www.ncbi.nlm.nih.gov/ncbi-bin/caddisp.pl?gene=FN1">https://www.genecards.org/cgi-bin/caddisp.pl?gene=FN1</a>       |
| JAK2   | Janus Kinase 2                                     | Protein Coding | 50 | GC09P004985 | 7.1167   | <a href="http://www.ncbi.nlm.nih.gov/ncbi-bin/caddisp.pl?gene=JAK2">https://www.genecards.org/cgi-bin/caddisp.pl?gene=JAK2</a>     |
| CFLAR  | CASP8 And FADD Like Apoptosis Regulator            | Protein Coding | 43 | GC02P201117 | 7.103952 | <a href="http://www.ncbi.nlm.nih.gov/ncbi-bin/caddisp.pl?gene=CFLAR">https://www.genecards.org/cgi-bin/caddisp.pl?gene=CFLAR</a>   |
| CARD14 | Caspase Recruitment Domain Family Member 14        | Protein Coding | 41 | GC17P080170 | 7.082204 | <a href="http://www.ncbi.nlm.nih.gov/ncbi-bin/caddisp.pl?gene=CARD14">https://www.genecards.org/cgi-bin/caddisp.pl?gene=CARD14</a> |
| VIM    | Vimentin                                           | Protein Coding | 48 | GC10P017227 | 7.064986 | <a href="http://www.ncbi.nlm.nih.gov/ncbi-bin/caddisp.pl?gene=VIM">https://www.genecards.org/cgi-bin/caddisp.pl?gene=VIM</a>       |
| OPRM1  | Opioid Receptor Mu 1                               | Protein Coding | 46 | GC06P154075 | 7.063599 | <a href="http://www.ncbi.nlm.nih.gov/ncbi-bin/caddisp.pl?gene=OPRM1">https://www.genecards.org/cgi-bin/caddisp.pl?gene=OPRM1</a>   |
| AFF3   | AF4/FMR2 Family Member 3                           | Protein Coding | 37 | GC02M099545 | 7.046799 | <a href="http://www.ncbi.nlm.nih.gov/ncbi-bin/caddisp.pl?gene=AFF3">https://www.genecards.org/cgi-bin/caddisp.pl?gene=AFF3</a>     |
| IGHM   | Immunoglobulin Heavy Constant Mu                   | Protein Coding | 36 | GC14M112722 | 7.043907 | <a href="http://www.ncbi.nlm.nih.gov/ncbi-bin/caddisp.pl?gene=IGHM">https://www.genecards.org/cgi-bin/caddisp.pl?gene=IGHM</a>     |
| BSG    | Basigin (Ok Blood Group)                           | Protein Coding | 42 | GC19P000571 | 7.027616 | <a href="http://www.ncbi.nlm.nih.gov/ncbi-bin/caddisp.pl?gene=BSG">https://www.genecards.org/cgi-bin/caddisp.pl?gene=BSG</a>       |



|          |                                                          |                |    |             |          |                                                                                                                                       |
|----------|----------------------------------------------------------|----------------|----|-------------|----------|---------------------------------------------------------------------------------------------------------------------------------------|
| PPP1CA   | Protein Phosphatase 1 Catalytic Subunit Alpha            | Protein Coding | 45 | GC11M089964 | 6.98515  | <a href="https://www.genecards.org/cgi-bin/carddisp.pl?gene=PPP1CA">https://www.genecards.org/cgi-bin/carddisp.pl?gene=PPP1CA</a>     |
| CD274    | CD274 Molecule                                           | Protein Coding | 42 | GC09P005450 | 6.985113 | <a href="https://www.genecards.org/cgi-bin/carddisp.pl?gene=CD274">https://www.genecards.org/cgi-bin/carddisp.pl?gene=CD274</a>       |
| SOD1     | Superoxide Dismutase 1                                   | Protein Coding | 50 | GC21P031659 | 6.984756 | <a href="https://www.genecards.org/cgi-bin/carddisp.pl?gene=SOD1">https://www.genecards.org/cgi-bin/carddisp.pl?gene=SOD1</a>         |
| TGFBR2   | Transforming Growth Factor Beta Receptor 2               | Protein Coding | 49 | GC03P030623 | 6.981699 | <a href="https://www.genecards.org/cgi-bin/carddisp.pl?gene=TGFBR2">https://www.genecards.org/cgi-bin/carddisp.pl?gene=TGFBR2</a>     |
| CP       | Ceruloplasmin                                            | Protein Coding | 48 | GC03M149162 | 6.978659 | <a href="https://www.genecards.org/cgi-bin/carddisp.pl?gene=CP">https://www.genecards.org/cgi-bin/carddisp.pl?gene=CP</a>             |
| TNFSF13  | TNF Superfamily Member 13                                | Protein Coding | 43 | GC17P007558 | 6.969742 | <a href="https://www.genecards.org/cgi-bin/carddisp.pl?gene=TNFSF13">https://www.genecards.org/cgi-bin/carddisp.pl?gene=TNFSF13</a>   |
| ADAMTS5  | ADAM Metallopeptidase With Thrombospondin Type 1 Motif 5 | Protein Coding | 43 | GC21M026918 | 6.961925 | <a href="https://www.genecards.org/cgi-bin/carddisp.pl?gene=ADAMTS5">https://www.genecards.org/cgi-bin/carddisp.pl?gene=ADAMTS5</a>   |
| P2RX7    | Purinergic Receptor P2X 7                                | Protein Coding | 45 | GC12P126220 | 6.924053 | <a href="https://www.genecards.org/cgi-bin/carddisp.pl?gene=P2RX7">https://www.genecards.org/cgi-bin/carddisp.pl?gene=P2RX7</a>       |
| KIF5A    | Kinesin Family Member 5A                                 | Protein Coding | 44 | GC12P057549 | 6.896127 | <a href="https://www.genecards.org/cgi-bin/carddisp.pl?gene=KIF5A">https://www.genecards.org/cgi-bin/carddisp.pl?gene=KIF5A</a>       |
| IRF1     | Interferon Regulatory Factor 1                           | Protein Coding | 45 | GC05M132440 | 6.884698 | <a href="https://www.genecards.org/cgi-bin/carddisp.pl?gene=IRF1">https://www.genecards.org/cgi-bin/carddisp.pl?gene=IRF1</a>         |
| CALR     | Calreticulin                                             | Protein Coding | 49 | GC19P012938 | 6.875739 | <a href="https://www.genecards.org/cgi-bin/carddisp.pl?gene=CALR">https://www.genecards.org/cgi-bin/carddisp.pl?gene=CALR</a>         |
| TNFRSF14 | TNF Receptor Superfamily Member 14                       | Protein Coding | 41 | GC01P003935 | 6.871451 | <a href="https://www.genecards.org/cgi-bin/carddisp.pl?gene=TNFRSF14">https://www.genecards.org/cgi-bin/carddisp.pl?gene=TNFRSF14</a> |
| IL19     | Interleukin 19                                           | Protein Coding | 38 | GC01P206770 | 6.866909 | <a href="https://www.genecards.org/cgi-bin/carddisp.pl?gene=IL19">https://www.genecards.org/cgi-bin/carddisp.pl?gene=IL19</a>         |
| BPI      | Bactericidal Permeability Increasing Protein             | Protein Coding | 41 | GC20P038304 | 6.862829 | <a href="https://www.genecards.org/cgi-bin/carddisp.pl?gene=BPI">https://www.genecards.org/cgi-bin/carddisp.pl?gene=BPI</a>           |

|        |                                                                  |                |    |             |          |                                                                                                                                   |
|--------|------------------------------------------------------------------|----------------|----|-------------|----------|-----------------------------------------------------------------------------------------------------------------------------------|
|        |                                                                  |                |    |             |          | <a href="#">bin/carddisp.pl?gene=BPI</a>                                                                                          |
| AGER   | Advanced Glycosylation End-Product Specific Receptor             | Protein Coding | 44 | GC06M032180 | 6.844262 | <a href="https://www.genecards.org/cgi-bin/carddisp.pl?gene=AGER">https://www.genecards.org/cgi-bin/carddisp.pl?gene=AGER</a>     |
| HSPA8  | Heat Shock Protein Family A (Hsp70) Member 8                     | Protein Coding | 46 | GC11M123057 | 6.773395 | <a href="https://www.genecards.org/cgi-bin/carddisp.pl?gene=HSPA8">https://www.genecards.org/cgi-bin/carddisp.pl?gene=HSPA8</a>   |
| TRPV1  | Transient Receptor Potential Cation Channel Subfamily V Member 1 | Protein Coding | 45 | GC17M003565 | 6.770291 | <a href="https://www.genecards.org/cgi-bin/carddisp.pl?gene=TRPV1">https://www.genecards.org/cgi-bin/carddisp.pl?gene=TRPV1</a>   |
| RUNX1  | RUNX Family Transcription Factor 1                               | Protein Coding | 46 | GC21M034787 | 6.767153 | <a href="https://www.genecards.org/cgi-bin/carddisp.pl?gene=RUNX1">https://www.genecards.org/cgi-bin/carddisp.pl?gene=RUNX1</a>   |
| CD226  | CD226 Molecule                                                   | Protein Coding | 41 | GC18M069831 | 6.742834 | <a href="https://www.genecards.org/cgi-bin/carddisp.pl?gene=CD226">https://www.genecards.org/cgi-bin/carddisp.pl?gene=CD226</a>   |
| BCL2L1 | BCL2 Like 1                                                      | Protein Coding | 45 | GC20M031664 | 6.736197 | <a href="https://www.genecards.org/cgi-bin/carddisp.pl?gene=BCL2L1">https://www.genecards.org/cgi-bin/carddisp.pl?gene=BCL2L1</a> |
| IFNA1  | Interferon Alpha 1                                               | Protein Coding | 38 | GC09P021593 | 6.710809 | <a href="https://www.genecards.org/cgi-bin/carddisp.pl?gene=IFNA1">https://www.genecards.org/cgi-bin/carddisp.pl?gene=IFNA1</a>   |
| CD19   | CD19 Molecule                                                    | Protein Coding | 48 | GC16P040925 | 6.688719 | <a href="https://www.genecards.org/cgi-bin/carddisp.pl?gene=CD19">https://www.genecards.org/cgi-bin/carddisp.pl?gene=CD19</a>     |
| CCL11  | C-C Motif Chemokine Ligand 11                                    | Protein Coding | 41 | GC17P034285 | 6.646458 | <a href="https://www.genecards.org/cgi-bin/carddisp.pl?gene=CCL11">https://www.genecards.org/cgi-bin/carddisp.pl?gene=CCL11</a>   |
| CD5    | CD5 Molecule                                                     | Protein Coding | 40 | GC11P061114 | 6.610099 | <a href="https://www.genecards.org/cgi-bin/carddisp.pl?gene=CD5">https://www.genecards.org/cgi-bin/carddisp.pl?gene=CD5</a>       |
| GDF5   | Growth Differentiation Factor 5                                  | Protein Coding | 45 | GC20M035433 | 6.588206 | <a href="https://www.genecards.org/cgi-bin/carddisp.pl?gene=GDF5">https://www.genecards.org/cgi-bin/carddisp.pl?gene=GDF5</a>     |
| REN    | Renin                                                            | Protein Coding | 47 | GC01M204154 | 6.565386 | <a href="https://www.genecards.org/cgi-bin/carddisp.pl?gene=REN">https://www.genecards.org/cgi-bin/carddisp.pl?gene=REN</a>       |
| TTC7A  | Tetratricopeptide Repeat Domain 7A                               | Protein Coding | 37 | GC02P046906 | 6.552021 | <a href="https://www.genecards.org/cgi-bin/carddisp.pl?gene=TTC7A">https://www.genecards.org/cgi-bin/carddisp.pl?gene=TTC7A</a>   |

|             |                                                                   |                |    |             |          |                                                                                                                                             |
|-------------|-------------------------------------------------------------------|----------------|----|-------------|----------|---------------------------------------------------------------------------------------------------------------------------------------------|
| CXCR2       | C-X-C Motif Chemokine Receptor 2                                  | Protein Coding | 48 | GC02P218125 | 6.54776  | <a href="https://www.genecards.org/cgi-bin/carddisp.pl?gene=CXCR2">https://www.genecards.org/cgi-bin/carddisp.pl?gene=CXCR2</a>             |
| RAB27A      | RAB27A, Member RAS Oncogene Family                                | Protein Coding | 47 | GC15M055202 | 6.525616 | <a href="https://www.genecards.org/cgi-bin/carddisp.pl?gene=RAB27A">https://www.genecards.org/cgi-bin/carddisp.pl?gene=RAB27A</a>           |
| PPP1CB      | Protein Phosphatase 1 Catalytic Subunit Beta                      | Protein Coding | 45 | GC02P028752 | 6.52534  | <a href="https://www.genecards.org/cgi-bin/carddisp.pl?gene=PPP1CB">https://www.genecards.org/cgi-bin/carddisp.pl?gene=PPP1CB</a>           |
| ABCG2       | ATP Binding Cassette Subfamily G Member 2 (Junior Blood Group)    | Protein Coding | 48 | GC04M088090 | 6.523985 | <a href="https://www.genecards.org/cgi-bin/carddisp.pl?gene=ABCG2">https://www.genecards.org/cgi-bin/carddisp.pl?gene=ABCG2</a>             |
| HRH2        | Histamine Receptor H2                                             | Protein Coding | 42 | GC05P175659 | 6.494742 | <a href="https://www.genecards.org/cgi-bin/carddisp.pl?gene=HRH2">https://www.genecards.org/cgi-bin/carddisp.pl?gene=HRH2</a>               |
| MTRR        | 5-Methyltetrahydrofolate-Homocysteine Methyltransferase Reductase | Protein Coding | 42 | GC05P007851 | 6.485223 | <a href="https://www.genecards.org/cgi-bin/carddisp.pl?gene=MTRR">https://www.genecards.org/cgi-bin/carddisp.pl?gene=MTRR</a>               |
| ATM         | ATM Serine/Threonine Kinase                                       | Protein Coding | 50 | GC11P108222 | 6.477387 | <a href="https://www.genecards.org/cgi-bin/carddisp.pl?gene=ATM">https://www.genecards.org/cgi-bin/carddisp.pl?gene=ATM</a>                 |
| ATRIP       | ATR Interacting Protein                                           | Protein Coding | 41 | GC03P048964 | 6.474064 | <a href="https://www.genecards.org/cgi-bin/carddisp.pl?gene=ATRIP">https://www.genecards.org/cgi-bin/carddisp.pl?gene=ATRIP</a>             |
| ATRIP-TREX1 | ATRIP-TREX1 Readthrough                                           | RNA Gene       | 6  | GC03P048966 | 6.474064 | <a href="https://www.genecards.org/cgi-bin/carddisp.pl?gene=ATRIP-TREX1">https://www.genecards.org/cgi-bin/carddisp.pl?gene=ATRIP-TREX1</a> |
| SLC17A5     | Solute Carrier Family 17 Member 5                                 | Protein Coding | 42 | GC06M073593 | 6.462096 | <a href="https://www.genecards.org/cgi-bin/carddisp.pl?gene=SLC17A5">https://www.genecards.org/cgi-bin/carddisp.pl?gene=SLC17A5</a>         |
| SUMO4       | Small Ubiquitin Like Modifier 4                                   | Protein Coding | 38 | GC06P149401 | 6.445432 | <a href="https://www.genecards.org/cgi-bin/carddisp.pl?gene=SUMO4">https://www.genecards.org/cgi-bin/carddisp.pl?gene=SUMO4</a>             |
| CXCL11      | C-X-C Motif Chemokine Ligand 11                                   | Protein Coding | 39 | GC04M076033 | 6.439353 | <a href="https://www.genecards.org/cgi-bin/carddisp.pl?gene=CXCL11">https://www.genecards.org/cgi-bin/carddisp.pl?gene=CXCL11</a>           |
| SQSTM1      | Sequestosome 1                                                    | Protein Coding | 46 | GC05P179806 | 6.422469 | <a href="https://www.genecards.org/cgi-bin/carddisp.pl?gene=SQSTM1">https://www.genecards.org/cgi-bin/carddisp.pl?gene=SQSTM1</a>           |
| C3          | Complement C3                                                     | Protein Coding | 46 | GC19M006677 | 6.418372 | <a href="https://www.genecards.org/cgi-">https://www.genecards.org/cgi-</a>                                                                 |

|              |                                                         |                |    |             |          |                                                                                                                                                      |
|--------------|---------------------------------------------------------|----------------|----|-------------|----------|------------------------------------------------------------------------------------------------------------------------------------------------------|
|              |                                                         |                |    |             |          | <a href="http://www.ncbi.nlm.nih.gov/ncbi/cdd/bin/carddisp.pl?gene=C3">bin/carddisp.pl?gene=C3</a>                                                   |
| HLA-DRB4     | Major Histocompatibility Complex, Class II, DR Beta 4   | Protein Coding | 29 | GC06M003851 | 6.408561 | <a href="http://www.ncbi.nlm.nih.gov/ncbi/cdd/bin/carddisp.pl?gene=HLA-DRB4">https://www.genecards.org/cgi-bin/carddisp.pl?gene=HLA-DRB4</a>         |
| WIPF1        | WAS/WASL Interacting Protein Family Member 1            | Protein Coding | 42 | GC02M174559 | 6.408106 | <a href="http://www.ncbi.nlm.nih.gov/ncbi/cdd/bin/carddisp.pl?gene=WIPF1">https://www.genecards.org/cgi-bin/carddisp.pl?gene=WIPF1</a>               |
| ENPP1        | Ectonucleotide Pyrophosphatase/Phosphodiesterase 1      | Protein Coding | 47 | GC06P131808 | 6.387311 | <a href="http://www.ncbi.nlm.nih.gov/ncbi/cdd/bin/carddisp.pl?gene=ENPP1">https://www.genecards.org/cgi-bin/carddisp.pl?gene=ENPP1</a>               |
| HMOX1        | Heme Oxygenase 1                                        | Protein Coding | 49 | GC22P035380 | 6.37917  | <a href="http://www.ncbi.nlm.nih.gov/ncbi/cdd/bin/carddisp.pl?gene=HMOX1">https://www.genecards.org/cgi-bin/carddisp.pl?gene=HMOX1</a>               |
| MTR          | 5-Methyltetrahydrofolate-Homocysteine Methyltransferase | Protein Coding | 46 | GC01P236795 | 6.375112 | <a href="http://www.ncbi.nlm.nih.gov/ncbi/cdd/bin/carddisp.pl?gene=MTR">https://www.genecards.org/cgi-bin/carddisp.pl?gene=MTR</a>                   |
| OLIG3        | Oligodendrocyte Transcription Factor 3                  | Protein Coding | 37 | GC06M137492 | 6.364253 | <a href="http://www.ncbi.nlm.nih.gov/ncbi/cdd/bin/carddisp.pl?gene=OLIG3">https://www.genecards.org/cgi-bin/carddisp.pl?gene=OLIG3</a>               |
| PTX3         | Pentraxin 3                                             | Protein Coding | 41 | GC03P157436 | 6.361873 | <a href="http://www.ncbi.nlm.nih.gov/ncbi/cdd/bin/carddisp.pl?gene=PTX3">https://www.genecards.org/cgi-bin/carddisp.pl?gene=PTX3</a>                 |
| GSTP1        | Glutathione S-Transferase Pi 1                          | Protein Coding | 48 | GC11P067583 | 6.341878 | <a href="http://www.ncbi.nlm.nih.gov/ncbi/cdd/bin/carddisp.pl?gene=GSTP1">https://www.genecards.org/cgi-bin/carddisp.pl?gene=GSTP1</a>               |
| CD27         | CD27 Molecule                                           | Protein Coding | 44 | GC12P021037 | 6.311881 | <a href="http://www.ncbi.nlm.nih.gov/ncbi/cdd/bin/carddisp.pl?gene=CD27">https://www.genecards.org/cgi-bin/carddisp.pl?gene=CD27</a>                 |
| FCAR         | Fc Alpha Receptor                                       | Protein Coding | 41 | GC19P067387 | 6.284546 | <a href="http://www.ncbi.nlm.nih.gov/ncbi/cdd/bin/carddisp.pl?gene=FCAR">https://www.genecards.org/cgi-bin/carddisp.pl?gene=FCAR</a>                 |
| HAVCR2       | Hepatitis A Virus Cellular Receptor 2                   | Protein Coding | 44 | GC05M157063 | 6.249082 | <a href="http://www.ncbi.nlm.nih.gov/ncbi/cdd/bin/carddisp.pl?gene=HAVCR2">https://www.genecards.org/cgi-bin/carddisp.pl?gene=HAVCR2</a>             |
| ICAM3        | Intercellular Adhesion Molecule 3                       | Protein Coding | 41 | GC19M010405 | 6.227779 | <a href="http://www.ncbi.nlm.nih.gov/ncbi/cdd/bin/carddisp.pl?gene=ICAM3">https://www.genecards.org/cgi-bin/carddisp.pl?gene=ICAM3</a>               |
| LOC100287329 | Uncharacterized LOC100287329                            | RNA Gene       | 12 | GC06M065958 | 6.225444 | <a href="http://www.ncbi.nlm.nih.gov/ncbi/cdd/bin/carddisp.pl?gene=LOC100287329">https://www.genecards.org/cgi-bin/carddisp.pl?gene=LOC100287329</a> |

|          |                                                                                                 |                |    |             |          |                                                                                                                                       |
|----------|-------------------------------------------------------------------------------------------------|----------------|----|-------------|----------|---------------------------------------------------------------------------------------------------------------------------------------|
| MTHFD1   | Methylenetetrahydrofolate Dehydrogenase, Cyclohydrolase And Formyltetrahydrofolate Synthetase 1 | Protein Coding | 45 | GC14P064388 | 6.218381 | <a href="https://www.genecards.org/cgi-bin/carddisp.pl?gene=MTHFD1">https://www.genecards.org/cgi-bin/carddisp.pl?gene=MTHFD1</a>     |
| TNFSF15  | TNF Superfamily Member 15                                                                       | Protein Coding | 42 | GC09M114784 | 6.201623 | <a href="https://www.genecards.org/cgi-bin/carddisp.pl?gene=TNFSF15">https://www.genecards.org/cgi-bin/carddisp.pl?gene=TNFSF15</a>   |
| MMEL1    | Membrane Metalloendopeptidase Like 1                                                            | Protein Coding | 36 | GC01M002590 | 6.187993 | <a href="https://www.genecards.org/cgi-bin/carddisp.pl?gene=MMEL1">https://www.genecards.org/cgi-bin/carddisp.pl?gene=MMEL1</a>       |
| APOE     | Apolipoprotein E                                                                                | Protein Coding | 48 | GC19P066879 | 6.18077  | <a href="https://www.genecards.org/cgi-bin/carddisp.pl?gene=APOE">https://www.genecards.org/cgi-bin/carddisp.pl?gene=APOE</a>         |
| HLA-DQA2 | Major Histocompatibility Complex, Class II, DQ Alpha 2                                          | Protein Coding | 36 | GC06P032741 | 6.169909 | <a href="https://www.genecards.org/cgi-bin/carddisp.pl?gene=HLA-DQA2">https://www.genecards.org/cgi-bin/carddisp.pl?gene=HLA-DQA2</a> |
| SELP     | Selectin P                                                                                      | Protein Coding | 44 | GC01M169558 | 6.164362 | <a href="https://www.genecards.org/cgi-bin/carddisp.pl?gene=SELP">https://www.genecards.org/cgi-bin/carddisp.pl?gene=SELP</a>         |
| PPARA    | Peroxisome Proliferator Activated Receptor Alpha                                                | Protein Coding | 44 | GC22P046150 | 6.159652 | <a href="https://www.genecards.org/cgi-bin/carddisp.pl?gene=PPARA">https://www.genecards.org/cgi-bin/carddisp.pl?gene=PPARA</a>       |
| JAK3     | Janus Kinase 3                                                                                  | Protein Coding | 49 | GC19M017824 | 6.12565  | <a href="https://www.genecards.org/cgi-bin/carddisp.pl?gene=JAK3">https://www.genecards.org/cgi-bin/carddisp.pl?gene=JAK3</a>         |
| EPO      | Erythropoietin                                                                                  | Protein Coding | 40 | GC07P100720 | 6.119741 | <a href="https://www.genecards.org/cgi-bin/carddisp.pl?gene=EPO">https://www.genecards.org/cgi-bin/carddisp.pl?gene=EPO</a>           |
| CXCL16   | C-X-C Motif Chemokine Ligand 16                                                                 | Protein Coding | 38 | GC17M004733 | 6.098456 | <a href="https://www.genecards.org/cgi-bin/carddisp.pl?gene=CXCL16">https://www.genecards.org/cgi-bin/carddisp.pl?gene=CXCL16</a>     |
| CCR4     | C-C Motif Chemokine Receptor 4                                                                  | Protein Coding | 43 | GC03P032951 | 6.09411  | <a href="https://www.genecards.org/cgi-bin/carddisp.pl?gene=CCR4">https://www.genecards.org/cgi-bin/carddisp.pl?gene=CCR4</a>         |
| TAPBP    | TAP Binding Protein                                                                             | Protein Coding | 44 | GC06M033299 | 6.079946 | <a href="https://www.genecards.org/cgi-bin/carddisp.pl?gene=TAPBP">https://www.genecards.org/cgi-bin/carddisp.pl?gene=TAPBP</a>       |
| CASP3    | Caspase 3                                                                                       | Protein Coding | 47 | GC04M184627 | 6.066989 | <a href="https://www.genecards.org/cgi-bin/carddisp.pl?gene=CASP3">https://www.genecards.org/cgi-bin/carddisp.pl?gene=CASP3</a>       |

|        |                                                                  |                |    |             |          |                                                                                                                                   |
|--------|------------------------------------------------------------------|----------------|----|-------------|----------|-----------------------------------------------------------------------------------------------------------------------------------|
| PNP    | Purine Nucleoside Phosphorylase                                  | Protein Coding | 45 | GC14P020468 | 6.061817 | <a href="https://www.genecards.org/cgi-bin/carddisp.pl?gene=PNP">https://www.genecards.org/cgi-bin/carddisp.pl?gene=PNP</a>       |
| CASP8  | Caspase 8                                                        | Protein Coding | 49 | GC02P201233 | 6.056796 | <a href="https://www.genecards.org/cgi-bin/carddisp.pl?gene=CASP8">https://www.genecards.org/cgi-bin/carddisp.pl?gene=CASP8</a>   |
| TRPV4  | Transient Receptor Potential Cation Channel Subfamily V Member 4 | Protein Coding | 48 | GC12M109783 | 6.025859 | <a href="https://www.genecards.org/cgi-bin/carddisp.pl?gene=TRPV4">https://www.genecards.org/cgi-bin/carddisp.pl?gene=TRPV4</a>   |
| CD83   | CD83 Molecule                                                    | Protein Coding | 38 | GC06P014117 | 6.022503 | <a href="https://www.genecards.org/cgi-bin/carddisp.pl?gene=CD83">https://www.genecards.org/cgi-bin/carddisp.pl?gene=CD83</a>     |
| CCL19  | C-C Motif Chemokine Ligand 19                                    | Protein Coding | 39 | GC09M034698 | 6.020863 | <a href="https://www.genecards.org/cgi-bin/carddisp.pl?gene=CCL19">https://www.genecards.org/cgi-bin/carddisp.pl?gene=CCL19</a>   |
| TGFBR1 | Transforming Growth Factor Beta Receptor 1                       | Protein Coding | 50 | GC09P099104 | 5.994832 | <a href="https://www.genecards.org/cgi-bin/carddisp.pl?gene=TGFBR1">https://www.genecards.org/cgi-bin/carddisp.pl?gene=TGFBR1</a> |
| CALCR  | Calcitonin Receptor                                              | Protein Coding | 46 | GC07M093424 | 5.985188 | <a href="https://www.genecards.org/cgi-bin/carddisp.pl?gene=CALCR">https://www.genecards.org/cgi-bin/carddisp.pl?gene=CALCR</a>   |
| FOS    | Fos Proto-Oncogene, AP-1 Transcription Factor Subunit            | Protein Coding | 49 | GC14P075278 | 5.979385 | <a href="https://www.genecards.org/cgi-bin/carddisp.pl?gene=FOS">https://www.genecards.org/cgi-bin/carddisp.pl?gene=FOS</a>       |
| COL9A3 | Collagen Type IX Alpha 3 Chain                                   | Protein Coding | 41 | GC20P062816 | 5.978811 | <a href="https://www.genecards.org/cgi-bin/carddisp.pl?gene=COL9A3">https://www.genecards.org/cgi-bin/carddisp.pl?gene=COL9A3</a> |
| ITGA2  | Integrin Subunit Alpha 2                                         | Protein Coding | 45 | GC05P052989 | 5.968368 | <a href="https://www.genecards.org/cgi-bin/carddisp.pl?gene=ITGA2">https://www.genecards.org/cgi-bin/carddisp.pl?gene=ITGA2</a>   |
| TLR7   | Toll Like Receptor 7                                             | Protein Coding | 46 | GC0XP012867 | 5.958578 | <a href="https://www.genecards.org/cgi-bin/carddisp.pl?gene=TLR7">https://www.genecards.org/cgi-bin/carddisp.pl?gene=TLR7</a>     |
| TRIM21 | Tripartite Motif Containing 21                                   | Protein Coding | 41 | GC11M004384 | 5.957069 | <a href="https://www.genecards.org/cgi-bin/carddisp.pl?gene=TRIM21">https://www.genecards.org/cgi-bin/carddisp.pl?gene=TRIM21</a> |
| B3GAT1 | Beta-1,3-Glucuronyltransferase 1                                 | Protein Coding | 42 | GC11M134378 | 5.942695 | <a href="https://www.genecards.org/cgi-bin/carddisp.pl?gene=B3GAT1">https://www.genecards.org/cgi-bin/carddisp.pl?gene=B3GAT1</a> |
| GATA3  | GATA Binding Protein 3                                           | Protein Coding | 47 | GC10P008045 | 5.924076 | <a href="https://www.genecards.org/cgi-bin/carddisp.pl?gene=GATA3">https://www.genecards.org/cgi-bin/carddisp.pl?gene=GATA3</a>   |

|          |                                            |                |    |             |          |                                                                                                                                              |
|----------|--------------------------------------------|----------------|----|-------------|----------|----------------------------------------------------------------------------------------------------------------------------------------------|
|          |                                            |                |    |             |          | <a href="http://www.ncbi.nlm.nih.gov/ncbi/cdd/bin/carddisp.pl?gene=GATA3">bin/carddisp.pl?gene=GATA3</a>                                     |
| MMP17    | Matrix Metalloproteinase 17                | Protein Coding | 42 | GC12P131828 | 5.905069 | <a href="http://www.ncbi.nlm.nih.gov/ncbi/cdd/bin/carddisp.pl?gene=MMP17">https://www.genecards.org/cgi-bin/carddisp.pl?gene=MMP17</a>       |
| ITGA4    | Integrin Subunit Alpha 4                   | Protein Coding | 46 | GC02P181456 | 5.899445 | <a href="http://www.ncbi.nlm.nih.gov/ncbi/cdd/bin/carddisp.pl?gene=ITGA4">https://www.genecards.org/cgi-bin/carddisp.pl?gene=ITGA4</a>       |
| SERPINA3 | Serpin Family A Member 3                   | Protein Coding | 42 | GC14P094612 | 5.893335 | <a href="http://www.ncbi.nlm.nih.gov/ncbi/cdd/bin/carddisp.pl?gene=SERPINA3">https://www.genecards.org/cgi-bin/carddisp.pl?gene=SERPINA3</a> |
| XIAP     | X-Linked Inhibitor Of Apoptosis            | Protein Coding | 46 | GC0XP123859 | 5.88182  | <a href="http://www.ncbi.nlm.nih.gov/ncbi/cdd/bin/carddisp.pl?gene=XIAP">https://www.genecards.org/cgi-bin/carddisp.pl?gene=XIAP</a>         |
| IRAK4    | Interleukin 1 Receptor Associated Kinase 4 | Protein Coding | 45 | GC12P043758 | 5.876334 | <a href="http://www.ncbi.nlm.nih.gov/ncbi/cdd/bin/carddisp.pl?gene=IRAK4">https://www.genecards.org/cgi-bin/carddisp.pl?gene=IRAK4</a>       |
| VIP      | Vasoactive Intestinal Peptide              | Protein Coding | 43 | GC06P152750 | 5.874033 | <a href="http://www.ncbi.nlm.nih.gov/ncbi/cdd/bin/carddisp.pl?gene=VIP">https://www.genecards.org/cgi-bin/carddisp.pl?gene=VIP</a>           |
| ASPN     | Asporin                                    | Protein Coding | 41 | GC09M094207 | 5.865178 | <a href="http://www.ncbi.nlm.nih.gov/ncbi/cdd/bin/carddisp.pl?gene=ASPN">https://www.genecards.org/cgi-bin/carddisp.pl?gene=ASPN</a>         |
| AKT1     | AKT Serine/Threonine Kinase 1              | Protein Coding | 50 | GC14M104769 | 5.835953 | <a href="http://www.ncbi.nlm.nih.gov/ncbi/cdd/bin/carddisp.pl?gene=AKT1">https://www.genecards.org/cgi-bin/carddisp.pl?gene=AKT1</a>         |
| EGF      | Epidermal Growth Factor                    | Protein Coding | 49 | GC04P109912 | 5.833037 | <a href="http://www.ncbi.nlm.nih.gov/ncbi/cdd/bin/carddisp.pl?gene=EGF">https://www.genecards.org/cgi-bin/carddisp.pl?gene=EGF</a>           |
| BMP4     | Bone Morphogenetic Protein 4               | Protein Coding | 46 | GC14M053949 | 5.830775 | <a href="http://www.ncbi.nlm.nih.gov/ncbi/cdd/bin/carddisp.pl?gene=BMP4">https://www.genecards.org/cgi-bin/carddisp.pl?gene=BMP4</a>         |
| SERPINA1 | Serpin Family A Member 1                   | Protein Coding | 47 | GC14M094376 | 5.826702 | <a href="http://www.ncbi.nlm.nih.gov/ncbi/cdd/bin/carddisp.pl?gene=SERPINA1">https://www.genecards.org/cgi-bin/carddisp.pl?gene=SERPINA1</a> |
| ANGPT1   | Angiotensinogen 1                          | Protein Coding | 44 | GC08M107246 | 5.818006 | <a href="http://www.ncbi.nlm.nih.gov/ncbi/cdd/bin/carddisp.pl?gene=ANGPT1">https://www.genecards.org/cgi-bin/carddisp.pl?gene=ANGPT1</a>     |
| TNFSF10  | TNF Superfamily Member 10                  | Protein Coding | 42 | GC03M172505 | 5.817306 | <a href="http://www.ncbi.nlm.nih.gov/ncbi/cdd/bin/carddisp.pl?gene=TNFSF10">https://www.genecards.org/cgi-bin/carddisp.pl?gene=TNFSF10</a>   |

|        |                                                  |                |    |             |          |                                                                                                                                   |
|--------|--------------------------------------------------|----------------|----|-------------|----------|-----------------------------------------------------------------------------------------------------------------------------------|
| CD163  | CD163 Molecule                                   | Protein Coding | 42 | GC12M007819 | 5.807335 | <a href="https://www.genecards.org/cgi-bin/carddisp.pl?gene=CD163">https://www.genecards.org/cgi-bin/carddisp.pl?gene=CD163</a>   |
| ITGB1  | Integrin Subunit Beta 1                          | Protein Coding | 48 | GC10M033116 | 5.803552 | <a href="https://www.genecards.org/cgi-bin/carddisp.pl?gene=ITGB1">https://www.genecards.org/cgi-bin/carddisp.pl?gene=ITGB1</a>   |
| SOST   | Sclerostin                                       | Protein Coding | 42 | GC17M043753 | 5.798334 | <a href="https://www.genecards.org/cgi-bin/carddisp.pl?gene=SOST">https://www.genecards.org/cgi-bin/carddisp.pl?gene=SOST</a>     |
| SRC    | SRC Proto-Oncogene, Non-Receptor Tyrosine Kinase | Protein Coding | 49 | GC20P037344 | 5.788343 | <a href="https://www.genecards.org/cgi-bin/carddisp.pl?gene=SRC">https://www.genecards.org/cgi-bin/carddisp.pl?gene=SRC</a>       |
| MUC5B  | Mucin 5B, Oligomeric Mucus/Gel-Forming           | Protein Coding | 41 | GC11P001831 | 5.763791 | <a href="https://www.genecards.org/cgi-bin/carddisp.pl?gene=MUC5B">https://www.genecards.org/cgi-bin/carddisp.pl?gene=MUC5B</a>   |
| SOCS3  | Suppressor Of Cytokine Signaling 3               | Protein Coding | 41 | GC17M078356 | 5.740062 | <a href="https://www.genecards.org/cgi-bin/carddisp.pl?gene=SOCS3">https://www.genecards.org/cgi-bin/carddisp.pl?gene=SOCS3</a>   |
| TRB    | T Cell Receptor Beta Locus                       | Protein Coding | 19 | GC07P148690 | 5.738567 | <a href="https://www.genecards.org/cgi-bin/carddisp.pl?gene=TRB">https://www.genecards.org/cgi-bin/carddisp.pl?gene=TRB</a>       |
| PRKCH  | Protein Kinase C Eta                             | Protein Coding | 48 | GC14P061187 | 5.737882 | <a href="https://www.genecards.org/cgi-bin/carddisp.pl?gene=PRKCH">https://www.genecards.org/cgi-bin/carddisp.pl?gene=PRKCH</a>   |
| FPGS   | Folylpolyglutamate Synthase                      | Protein Coding | 41 | GC09P127794 | 5.735916 | <a href="https://www.genecards.org/cgi-bin/carddisp.pl?gene=FPGS">https://www.genecards.org/cgi-bin/carddisp.pl?gene=FPGS</a>     |
| PTEN   | Phosphatase And Tensin Homolog                   | Protein Coding | 50 | GC10P092487 | 5.722382 | <a href="https://www.genecards.org/cgi-bin/carddisp.pl?gene=PTEN">https://www.genecards.org/cgi-bin/carddisp.pl?gene=PTEN</a>     |
| MTOR   | Mechanistic Target Of Rapamycin Kinase           | Protein Coding | 51 | GC01M011106 | 5.715071 | <a href="https://www.genecards.org/cgi-bin/carddisp.pl?gene=MTOR">https://www.genecards.org/cgi-bin/carddisp.pl?gene=MTOR</a>     |
| PIK3R1 | Phosphoinositide-3-Kinase Regulatory Subunit 1   | Protein Coding | 49 | GC05P068215 | 5.710825 | <a href="https://www.genecards.org/cgi-bin/carddisp.pl?gene=PIK3R1">https://www.genecards.org/cgi-bin/carddisp.pl?gene=PIK3R1</a> |
| SH2B3  | SH2B Adaptor Protein 3                           | Protein Coding | 45 | GC12P111405 | 5.707057 | <a href="https://www.genecards.org/cgi-bin/carddisp.pl?gene=SH2B3">https://www.genecards.org/cgi-bin/carddisp.pl?gene=SH2B3</a>   |
| F3     | Coagulation Factor III, Tissue Factor            | Protein Coding | 44 | GC01M094590 | 5.683108 | <a href="https://www.genecards.org/cgi-">https://www.genecards.org/cgi-</a>                                                       |



|         |                                       |                |    |             |          |                                                                                                                                            |
|---------|---------------------------------------|----------------|----|-------------|----------|--------------------------------------------------------------------------------------------------------------------------------------------|
|         |                                       |                |    |             |          | <a href="http://www.ncbi.nlm.nih.gov/ncbi/cdd/bin/carddisp.pl?gene=F3">bin/carddisp.pl?gene=F3</a>                                         |
| GGH     | Gamma-Glutamyl Hydrolase              | Protein Coding | 42 | GC08M063014 | 5.675788 | <a href="http://www.ncbi.nlm.nih.gov/ncbi/cdd/bin/carddisp.pl?gene=GGH">https://www.genecards.org/cgi-bin/carddisp.pl?gene=GGH</a>         |
| IL7R    | Interleukin 7 Receptor                | Protein Coding | 44 | GC05P035852 | 5.666647 | <a href="http://www.ncbi.nlm.nih.gov/ncbi/cdd/bin/carddisp.pl?gene=IL7R">https://www.genecards.org/cgi-bin/carddisp.pl?gene=IL7R</a>       |
| NPY     | Neuropeptide Y                        | Protein Coding | 44 | GC07P024290 | 5.647635 | <a href="http://www.ncbi.nlm.nih.gov/ncbi/cdd/bin/carddisp.pl?gene=NPY">https://www.genecards.org/cgi-bin/carddisp.pl?gene=NPY</a>         |
| IMPDH2  | Inosine Monophosphate Dehydrogenase 2 | Protein Coding | 46 | GC03M051162 | 5.643008 | <a href="http://www.ncbi.nlm.nih.gov/ncbi/cdd/bin/carddisp.pl?gene=IMPDH2">https://www.genecards.org/cgi-bin/carddisp.pl?gene=IMPDH2</a>   |
| SOCS1   | Suppressor Of Cytokine Signaling 1    | Protein Coding | 42 | GC16M012261 | 5.640675 | <a href="http://www.ncbi.nlm.nih.gov/ncbi/cdd/bin/carddisp.pl?gene=SOCS1">https://www.genecards.org/cgi-bin/carddisp.pl?gene=SOCS1</a>     |
| SLC22A5 | Solute Carrier Family 22 Member 5     | Protein Coding | 46 | GC05P132369 | 5.637074 | <a href="http://www.ncbi.nlm.nih.gov/ncbi/cdd/bin/carddisp.pl?gene=SLC22A5">https://www.genecards.org/cgi-bin/carddisp.pl?gene=SLC22A5</a> |
| GSTT1   | Glutathione S-Transferase Theta 1     | Protein Coding | 33 | GC22Mi00270 | 5.630356 | <a href="http://www.ncbi.nlm.nih.gov/ncbi/cdd/bin/carddisp.pl?gene=GSTT1">https://www.genecards.org/cgi-bin/carddisp.pl?gene=GSTT1</a>     |
| MATN1   | Matrilin 1                            | Protein Coding | 40 | GC01M030711 | 5.624109 | <a href="http://www.ncbi.nlm.nih.gov/ncbi/cdd/bin/carddisp.pl?gene=MATN1">https://www.genecards.org/cgi-bin/carddisp.pl?gene=MATN1</a>     |
| KITLG   | KIT Ligand                            | Protein Coding | 43 | GC12M088492 | 5.614833 | <a href="http://www.ncbi.nlm.nih.gov/ncbi/cdd/bin/carddisp.pl?gene=KITLG">https://www.genecards.org/cgi-bin/carddisp.pl?gene=KITLG</a>     |
| THBD    | Thrombomodulin                        | Protein Coding | 44 | GC20M023026 | 5.603651 | <a href="http://www.ncbi.nlm.nih.gov/ncbi/cdd/bin/carddisp.pl?gene=THBD">https://www.genecards.org/cgi-bin/carddisp.pl?gene=THBD</a>       |
| CNR2    | Cannabinoid Receptor 2                | Protein Coding | 44 | GC01M023870 | 5.572924 | <a href="http://www.ncbi.nlm.nih.gov/ncbi/cdd/bin/carddisp.pl?gene=CNR2">https://www.genecards.org/cgi-bin/carddisp.pl?gene=CNR2</a>       |
| DEFB4A  | Defensin Beta 4A                      | Protein Coding | 34 | GC08P007895 | 5.548926 | <a href="http://www.ncbi.nlm.nih.gov/ncbi/cdd/bin/carddisp.pl?gene=DEFB4A">https://www.genecards.org/cgi-bin/carddisp.pl?gene=DEFB4A</a>   |
| AIF1    | Allograft Inflammatory Factor 1       | Protein Coding | 37 | GC06P083694 | 5.534014 | <a href="http://www.ncbi.nlm.nih.gov/ncbi/cdd/bin/carddisp.pl?gene=AIF1">https://www.genecards.org/cgi-bin/carddisp.pl?gene=AIF1</a>       |

|          |                                                            |                |    |             |          |                                                                                                                                       |
|----------|------------------------------------------------------------|----------------|----|-------------|----------|---------------------------------------------------------------------------------------------------------------------------------------|
| SOD2     | Superoxide Dismutase 2                                     | Protein Coding | 48 | GC06M159669 | 5.532454 | <a href="https://www.genecards.org/cgi-bin/carddisp.pl?gene=SOD2">https://www.genecards.org/cgi-bin/carddisp.pl?gene=SOD2</a>         |
| NFKBIE   | NFKB Inhibitor Epsilon                                     | Protein Coding | 38 | GC06M044258 | 5.517525 | <a href="https://www.genecards.org/cgi-bin/carddisp.pl?gene=NFKBIE">https://www.genecards.org/cgi-bin/carddisp.pl?gene=NFKBIE</a>     |
| PRDM1    | PR/SET Domain 1                                            | Protein Coding | 43 | GC06P105993 | 5.491177 | <a href="https://www.genecards.org/cgi-bin/carddisp.pl?gene=PRDM1">https://www.genecards.org/cgi-bin/carddisp.pl?gene=PRDM1</a>       |
| CYP2C19  | Cytochrome P450 Family 2 Subfamily C Member 19             | Protein Coding | 46 | GC10P094762 | 5.480085 | <a href="https://www.genecards.org/cgi-bin/carddisp.pl?gene=CYP2C19">https://www.genecards.org/cgi-bin/carddisp.pl?gene=CYP2C19</a>   |
| TNFRSF25 | TNF Receptor Superfamily Member 25                         | Protein Coding | 40 | GC01M006460 | 5.475738 | <a href="https://www.genecards.org/cgi-bin/carddisp.pl?gene=TNFRSF25">https://www.genecards.org/cgi-bin/carddisp.pl?gene=TNFRSF25</a> |
| F2RL1    | F2R Like Trypsin Receptor 1                                | Protein Coding | 44 | GC05P076818 | 5.467809 | <a href="https://www.genecards.org/cgi-bin/carddisp.pl?gene=F2RL1">https://www.genecards.org/cgi-bin/carddisp.pl?gene=F2RL1</a>       |
| PLAUR    | Plasminogen Activator, Urokinase Receptor                  | Protein Coding | 42 | GC19M043646 | 5.436357 | <a href="https://www.genecards.org/cgi-bin/carddisp.pl?gene=PLAUR">https://www.genecards.org/cgi-bin/carddisp.pl?gene=PLAUR</a>       |
| EDN1     | Endothelin 1                                               | Protein Coding | 46 | GC06P012256 | 5.424318 | <a href="https://www.genecards.org/cgi-bin/carddisp.pl?gene=EDN1">https://www.genecards.org/cgi-bin/carddisp.pl?gene=EDN1</a>         |
| PTPN11   | Protein Tyrosine Phosphatase Non-Receptor Type 11          | Protein Coding | 50 | GC12P112418 | 5.418618 | <a href="https://www.genecards.org/cgi-bin/carddisp.pl?gene=PTPN11">https://www.genecards.org/cgi-bin/carddisp.pl?gene=PTPN11</a>     |
| ZAP70    | Zeta Chain Of T Cell Receptor Associated Protein Kinase 70 | Protein Coding | 49 | GC02P097753 | 5.417872 | <a href="https://www.genecards.org/cgi-bin/carddisp.pl?gene=ZAP70">https://www.genecards.org/cgi-bin/carddisp.pl?gene=ZAP70</a>       |
| RNASEH2B | Ribonuclease H2 Subunit B                                  | Protein Coding | 36 | GC13P050909 | 5.408074 | <a href="https://www.genecards.org/cgi-bin/carddisp.pl?gene=RNASEH2B">https://www.genecards.org/cgi-bin/carddisp.pl?gene=RNASEH2B</a> |
| TEK      | TEK Receptor Tyrosine Kinase                               | Protein Coding | 49 | GC09P027109 | 5.394337 | <a href="https://www.genecards.org/cgi-bin/carddisp.pl?gene=TEK">https://www.genecards.org/cgi-bin/carddisp.pl?gene=TEK</a>           |
| H2AC18   | H2A Clustered Histone 18                                   | Protein Coding | 26 | GC01M152015 | 5.390277 | <a href="https://www.genecards.org/cgi-bin/carddisp.pl?gene=H2AC18">https://www.genecards.org/cgi-bin/carddisp.pl?gene=H2AC18</a>     |
| ZFP36    | ZFP36 Ring Finger Protein                                  | Protein Coding | 37 | GC19P039406 | 5.38878  | <a href="https://www.genecards.org/cgi-">https://www.genecards.org/cgi-</a>                                                           |

|        |                                                                        |                |    |             |          |                                                                                                                                          |
|--------|------------------------------------------------------------------------|----------------|----|-------------|----------|------------------------------------------------------------------------------------------------------------------------------------------|
|        |                                                                        |                |    |             |          | <a href="http://www.ncbi.nlm.nih.gov/ncbi/cdd/bin/carddisp.pl?gene=ZFP36">bin/carddisp.pl?gene=ZFP36</a>                                 |
| RBPJ   | Recombination Signal Binding Protein For Immunoglobulin Kappa J Region | Protein Coding | 45 | GC04P026105 | 5.386807 | <a href="http://www.ncbi.nlm.nih.gov/ncbi/cdd/bin/carddisp.pl?gene=RBPJ">https://www.genecards.org/cgi-bin/carddisp.pl?gene=RBPJ</a>     |
| HAVCR1 | Hepatitis A Virus Cellular Receptor 1                                  | Protein Coding | 41 | GC05M157028 | 5.377156 | <a href="http://www.ncbi.nlm.nih.gov/ncbi/cdd/bin/carddisp.pl?gene=HAVCR1">https://www.genecards.org/cgi-bin/carddisp.pl?gene=HAVCR1</a> |
| GZMA   | Granzyme A                                                             | Protein Coding | 42 | GC05P055102 | 5.359779 | <a href="http://www.ncbi.nlm.nih.gov/ncbi/cdd/bin/carddisp.pl?gene=GZMA">https://www.genecards.org/cgi-bin/carddisp.pl?gene=GZMA</a>     |
| TAC1   | Tachykinin Precursor 1                                                 | Protein Coding | 41 | GC07P097731 | 5.356418 | <a href="http://www.ncbi.nlm.nih.gov/ncbi/cdd/bin/carddisp.pl?gene=TAC1">https://www.genecards.org/cgi-bin/carddisp.pl?gene=TAC1</a>     |
| RNPC3  | RNA Binding Region (RNP1, RRM) Containing 3                            | Protein Coding | 35 | GC01P103525 | 5.353688 | <a href="http://www.ncbi.nlm.nih.gov/ncbi/cdd/bin/carddisp.pl?gene=RNPC3">https://www.genecards.org/cgi-bin/carddisp.pl?gene=RNPC3</a>   |
| ITPA   | Inosine Triphosphatase                                                 | Protein Coding | 44 | GC20P004250 | 5.335377 | <a href="http://www.ncbi.nlm.nih.gov/ncbi/cdd/bin/carddisp.pl?gene=ITPA">https://www.genecards.org/cgi-bin/carddisp.pl?gene=ITPA</a>     |
| ATXN2  | Ataxin 2                                                               | Protein Coding | 41 | GC12M111443 | 5.328629 | <a href="http://www.ncbi.nlm.nih.gov/ncbi/cdd/bin/carddisp.pl?gene=ATXN2">https://www.genecards.org/cgi-bin/carddisp.pl?gene=ATXN2</a>   |
| HTR2A  | 5-Hydroxytryptamine Receptor 2A                                        | Protein Coding | 46 | GC13M046831 | 5.319273 | <a href="http://www.ncbi.nlm.nih.gov/ncbi/cdd/bin/carddisp.pl?gene=HTR2A">https://www.genecards.org/cgi-bin/carddisp.pl?gene=HTR2A</a>   |
| FCGR1A | Fc Gamma Receptor Ia                                                   | Protein Coding | 40 | GC01P150197 | 5.309157 | <a href="http://www.ncbi.nlm.nih.gov/ncbi/cdd/bin/carddisp.pl?gene=FCGR1A">https://www.genecards.org/cgi-bin/carddisp.pl?gene=FCGR1A</a> |
| CD55   | CD55 Molecule (Cromer Blood Group)                                     | Protein Coding | 45 | GC01P207321 | 5.290905 | <a href="http://www.ncbi.nlm.nih.gov/ncbi/cdd/bin/carddisp.pl?gene=CD55">https://www.genecards.org/cgi-bin/carddisp.pl?gene=CD55</a>     |
| PLAT   | Plasminogen Activator, Tissue Type                                     | Protein Coding | 48 | GC08M042174 | 5.276639 | <a href="http://www.ncbi.nlm.nih.gov/ncbi/cdd/bin/carddisp.pl?gene=PLAT">https://www.genecards.org/cgi-bin/carddisp.pl?gene=PLAT</a>     |
| KLRK1  | Killer Cell Lectin Like Receptor K1                                    | Protein Coding | 40 | GC12M021107 | 5.271939 | <a href="http://www.ncbi.nlm.nih.gov/ncbi/cdd/bin/carddisp.pl?gene=KLRK1">https://www.genecards.org/cgi-bin/carddisp.pl?gene=KLRK1</a>   |
| PLAU   | Plasminogen Activator, Urokinase                                       | Protein Coding | 50 | GC10P073909 | 5.263295 | <a href="http://www.ncbi.nlm.nih.gov/ncbi/cdd/bin/carddisp.pl?gene=PLAU">https://www.genecards.org/cgi-bin/carddisp.pl?gene=PLAU</a>     |

|          |                                        |                |    |             |          |                                                                                                                                       |
|----------|----------------------------------------|----------------|----|-------------|----------|---------------------------------------------------------------------------------------------------------------------------------------|
| IL9      | Interleukin 9                          | Protein Coding | 41 | GC05M135891 | 5.260829 | <a href="https://www.genecards.org/cgi-bin/carddisp.pl?gene=IL9">https://www.genecards.org/cgi-bin/carddisp.pl?gene=IL9</a>           |
| TNFRSF17 | TNF Receptor Superfamily Member 17     | Protein Coding | 42 | GC16P011965 | 5.259591 | <a href="https://www.genecards.org/cgi-bin/carddisp.pl?gene=TNFRSF17">https://www.genecards.org/cgi-bin/carddisp.pl?gene=TNFRSF17</a> |
| GAS5     | Growth Arrest Specific 5               | RNA Gene       | 24 | GC01M173947 | 5.258753 | <a href="https://www.genecards.org/cgi-bin/carddisp.pl?gene=GAS5">https://www.genecards.org/cgi-bin/carddisp.pl?gene=GAS5</a>         |
| LRP5     | LDL Receptor Related Protein 5         | Protein Coding | 47 | GC11P068298 | 5.258183 | <a href="https://www.genecards.org/cgi-bin/carddisp.pl?gene=LRP5">https://www.genecards.org/cgi-bin/carddisp.pl?gene=LRP5</a>         |
| IBSP     | Integrin Binding Sialoprotein          | Protein Coding | 37 | GC04P087799 | 5.229711 | <a href="https://www.genecards.org/cgi-bin/carddisp.pl?gene=IBSP">https://www.genecards.org/cgi-bin/carddisp.pl?gene=IBSP</a>         |
| IL20     | Interleukin 20                         | Protein Coding | 37 | GC01P206866 | 5.205414 | <a href="https://www.genecards.org/cgi-bin/carddisp.pl?gene=IL20">https://www.genecards.org/cgi-bin/carddisp.pl?gene=IL20</a>         |
| LEPQTL1  | Leptin, Serum Levels Of                | Genetic Locus  | 3  | GC02U903086 | 5.204472 | <a href="https://www.genecards.org/cgi-bin/carddisp.pl?gene=LEPQTL1">https://www.genecards.org/cgi-bin/carddisp.pl?gene=LEPQTL1</a>   |
| PTGER4   | Prostaglandin E Receptor 4             | Protein Coding | 45 | GC05P040679 | 5.203375 | <a href="https://www.genecards.org/cgi-bin/carddisp.pl?gene=PTGER4">https://www.genecards.org/cgi-bin/carddisp.pl?gene=PTGER4</a>     |
| INPP5E   | Inositol Polyphosphate-5-Phosphatase E | Protein Coding | 40 | GC09M136428 | 5.197738 | <a href="https://www.genecards.org/cgi-bin/carddisp.pl?gene=INPP5E">https://www.genecards.org/cgi-bin/carddisp.pl?gene=INPP5E</a>     |
| MIR140   | MicroRNA 140                           | RNA Gene       | 24 | GC16P069934 | 5.193281 | <a href="https://www.genecards.org/cgi-bin/carddisp.pl?gene=MIR140">https://www.genecards.org/cgi-bin/carddisp.pl?gene=MIR140</a>     |
| CDKN1A   | Cyclin Dependent Kinase Inhibitor 1A   | Protein Coding | 46 | GC06P083850 | 5.184971 | <a href="https://www.genecards.org/cgi-bin/carddisp.pl?gene=CDKN1A">https://www.genecards.org/cgi-bin/carddisp.pl?gene=CDKN1A</a>     |
| AR       | Androgen Receptor                      | Protein Coding | 50 | GC0XP067544 | 5.17087  | <a href="https://www.genecards.org/cgi-bin/carddisp.pl?gene=AR">https://www.genecards.org/cgi-bin/carddisp.pl?gene=AR</a>             |
| NGF      | Nerve Growth Factor                    | Protein Coding | 47 | GC01M115285 | 5.167191 | <a href="https://www.genecards.org/cgi-bin/carddisp.pl?gene=NGF">https://www.genecards.org/cgi-bin/carddisp.pl?gene=NGF</a>           |
| PSMB8    | Proteasome 20S Subunit Beta 8          | Protein Coding | 48 | GC06M032840 | 5.164179 | <a href="https://www.genecards.org/cgi-">https://www.genecards.org/cgi-</a>                                                           |

|         |                                                      |                |    |             |          |                                                                                                                                   |
|---------|------------------------------------------------------|----------------|----|-------------|----------|-----------------------------------------------------------------------------------------------------------------------------------|
|         |                                                      |                |    |             |          | <a href="http://bin/caddisp.pl?gene=PSMB8">bin/caddisp.pl?gene=PSMB8</a>                                                          |
| ASAH1   | N-Acylsphingosine Amidohydrolase 1                   | Protein Coding | 45 | GC08M018055 | 5.158409 | <a href="https://www.genecards.org/cgi-bin/caddisp.pl?gene=ASAH1">https://www.genecards.org/cgi-bin/caddisp.pl?gene=ASAH1</a>     |
| EGFR    | Epidermal Growth Factor Receptor                     | Protein Coding | 51 | GC07P055019 | 5.122825 | <a href="https://www.genecards.org/cgi-bin/caddisp.pl?gene=EGFR">https://www.genecards.org/cgi-bin/caddisp.pl?gene=EGFR</a>       |
| NPPB    | Natriuretic Peptide B                                | Protein Coding | 42 | GC01M011858 | 5.110035 | <a href="https://www.genecards.org/cgi-bin/caddisp.pl?gene=NPPB">https://www.genecards.org/cgi-bin/caddisp.pl?gene=NPPB</a>       |
| TACR1   | Tachykinin Receptor 1                                | Protein Coding | 44 | GC02M075112 | 5.092575 | <a href="https://www.genecards.org/cgi-bin/caddisp.pl?gene=TACR1">https://www.genecards.org/cgi-bin/caddisp.pl?gene=TACR1</a>     |
| IGFBP1  | Insulin Like Growth Factor Binding Protein 1         | Protein Coding | 41 | GC07P047770 | 5.092317 | <a href="https://www.genecards.org/cgi-bin/caddisp.pl?gene=IGFBP1">https://www.genecards.org/cgi-bin/caddisp.pl?gene=IGFBP1</a>   |
| NOTCH4  | Notch Receptor 4                                     | Protein Coding | 44 | GC06M065988 | 5.078926 | <a href="https://www.genecards.org/cgi-bin/caddisp.pl?gene=NOTCH4">https://www.genecards.org/cgi-bin/caddisp.pl?gene=NOTCH4</a>   |
| COL9A2  | Collagen Type IX Alpha 2 Chain                       | Protein Coding | 42 | GC01M040300 | 5.077526 | <a href="https://www.genecards.org/cgi-bin/caddisp.pl?gene=COL9A2">https://www.genecards.org/cgi-bin/caddisp.pl?gene=COL9A2</a>   |
| ESR2    | Estrogen Receptor 2                                  | Protein Coding | 47 | GC14M064084 | 5.073864 | <a href="https://www.genecards.org/cgi-bin/caddisp.pl?gene=ESR2">https://www.genecards.org/cgi-bin/caddisp.pl?gene=ESR2</a>       |
| SPRED2  | Sprouty Related EVH1 Domain Containing 2             | Protein Coding | 41 | GC02M065307 | 5.062191 | <a href="https://www.genecards.org/cgi-bin/caddisp.pl?gene=SPRED2">https://www.genecards.org/cgi-bin/caddisp.pl?gene=SPRED2</a>   |
| LPIN2   | Lipin 2                                              | Protein Coding | 41 | GC18M002916 | 5.054539 | <a href="https://www.genecards.org/cgi-bin/caddisp.pl?gene=LPIN2">https://www.genecards.org/cgi-bin/caddisp.pl?gene=LPIN2</a>     |
| CCL13   | C-C Motif Chemokine Ligand 13                        | Protein Coding | 36 | GC17P034356 | 5.029807 | <a href="https://www.genecards.org/cgi-bin/caddisp.pl?gene=CCL13">https://www.genecards.org/cgi-bin/caddisp.pl?gene=CCL13</a>     |
| UBASH3A | Ubiquitin Associated And SH3 Domain Containing A     | Protein Coding | 38 | GC21P042403 | 5.027813 | <a href="https://www.genecards.org/cgi-bin/caddisp.pl?gene=UBASH3A">https://www.genecards.org/cgi-bin/caddisp.pl?gene=UBASH3A</a> |
| STING1  | Stimulator Of Interferon Response CGAMP Interactor 1 | Protein Coding | 32 | GC05M139476 | 5.005392 | <a href="https://www.genecards.org/cgi-bin/caddisp.pl?gene=STING1">https://www.genecards.org/cgi-bin/caddisp.pl?gene=STING1</a>   |

|        |                                                        |                |    |             |          |                                                                                                                                   |
|--------|--------------------------------------------------------|----------------|----|-------------|----------|-----------------------------------------------------------------------------------------------------------------------------------|
| APOM   | Apolipoprotein M                                       | Protein Coding | 40 | GC06P083702 | 5.000204 | <a href="https://www.genecards.org/cgi-bin/carddisp.pl?gene=APOM">https://www.genecards.org/cgi-bin/carddisp.pl?gene=APOM</a>     |
| CST3   | Cystatin C                                             | Protein Coding | 42 | GC20M023667 | 4.991611 | <a href="https://www.genecards.org/cgi-bin/carddisp.pl?gene=CST3">https://www.genecards.org/cgi-bin/carddisp.pl?gene=CST3</a>     |
| DHFR   | Dihydrofolate Reductase                                | Protein Coding | 47 | GC05M080626 | 4.982999 | <a href="https://www.genecards.org/cgi-bin/carddisp.pl?gene=DHFR">https://www.genecards.org/cgi-bin/carddisp.pl?gene=DHFR</a>     |
| CD2    | CD2 Molecule                                           | Protein Coding | 42 | GC01P116754 | 4.977384 | <a href="https://www.genecards.org/cgi-bin/carddisp.pl?gene=CD2">https://www.genecards.org/cgi-bin/carddisp.pl?gene=CD2</a>       |
| ELN    | Elastin                                                | Protein Coding | 43 | GC07P074027 | 4.954332 | <a href="https://www.genecards.org/cgi-bin/carddisp.pl?gene=ELN">https://www.genecards.org/cgi-bin/carddisp.pl?gene=ELN</a>       |
| MIR223 | MicroRNA 223                                           | RNA Gene       | 22 | GC0XP066018 | 4.915719 | <a href="https://www.genecards.org/cgi-bin/carddisp.pl?gene=MIR223">https://www.genecards.org/cgi-bin/carddisp.pl?gene=MIR223</a> |
| STAT6  | Signal Transducer And Activator Of Transcription 6     | Protein Coding | 48 | GC12M057095 | 4.905521 | <a href="https://www.genecards.org/cgi-bin/carddisp.pl?gene=STAT6">https://www.genecards.org/cgi-bin/carddisp.pl?gene=STAT6</a>   |
| TNXB   | Tenascin XB                                            | Protein Coding | 43 | GC06M065977 | 4.873197 | <a href="https://www.genecards.org/cgi-bin/carddisp.pl?gene=TNXB">https://www.genecards.org/cgi-bin/carddisp.pl?gene=TNXB</a>     |
| IRF8   | Interferon Regulatory Factor 8                         | Protein Coding | 44 | GC16P085898 | 4.869159 | <a href="https://www.genecards.org/cgi-bin/carddisp.pl?gene=IRF8">https://www.genecards.org/cgi-bin/carddisp.pl?gene=IRF8</a>     |
| PARP1  | Poly(ADP-Ribose) Polymerase 1                          | Protein Coding | 47 | GC01M226360 | 4.865338 | <a href="https://www.genecards.org/cgi-bin/carddisp.pl?gene=PARP1">https://www.genecards.org/cgi-bin/carddisp.pl?gene=PARP1</a>   |
| NOD1   | Nucleotide Binding Oligomerization Domain Containing 1 | Protein Coding | 42 | GC07M030424 | 4.851906 | <a href="https://www.genecards.org/cgi-bin/carddisp.pl?gene=NOD1">https://www.genecards.org/cgi-bin/carddisp.pl?gene=NOD1</a>     |
| MIR21  | MicroRNA 21                                            | RNA Gene       | 24 | GC17P059841 | 4.831304 | <a href="https://www.genecards.org/cgi-bin/carddisp.pl?gene=MIR21">https://www.genecards.org/cgi-bin/carddisp.pl?gene=MIR21</a>   |
| AMPD1  | Adenosine Monophosphate Deaminase 1                    | Protein Coding | 45 | GC01M114673 | 4.829415 | <a href="https://www.genecards.org/cgi-bin/carddisp.pl?gene=AMPD1">https://www.genecards.org/cgi-bin/carddisp.pl?gene=AMPD1</a>   |
| F2     | Coagulation Factor II, Thrombin                        | Protein Coding | 48 | GC11P046720 | 4.828295 | <a href="https://www.genecards.org/cgi-bin/carddisp.pl?gene=F2">https://www.genecards.org/cgi-bin/carddisp.pl?gene=F2</a>         |

|         |                                                      |                |    |             |          |                                                                                                                                     |
|---------|------------------------------------------------------|----------------|----|-------------|----------|-------------------------------------------------------------------------------------------------------------------------------------|
|         |                                                      |                |    |             |          | <a href="#">bin/carddisp.pl?gene=F2</a>                                                                                             |
| IL21R   | Interleukin 21 Receptor                              | Protein Coding | 41 | GC16P027995 | 4.82569  | <a href="https://www.genecards.org/cgi-bin/carddisp.pl?gene=IL21R">https://www.genecards.org/cgi-bin/carddisp.pl?gene=IL21R</a>     |
| DDX41   | DEAD-Box Helicase 41                                 | Protein Coding | 43 | GC05M177511 | 4.806009 | <a href="https://www.genecards.org/cgi-bin/carddisp.pl?gene=DDX41">https://www.genecards.org/cgi-bin/carddisp.pl?gene=DDX41</a>     |
| STAT5B  | Signal Transducer And Activator Of Transcription 5B  | Protein Coding | 47 | GC17M042199 | 4.797704 | <a href="https://www.genecards.org/cgi-bin/carddisp.pl?gene=STAT5B">https://www.genecards.org/cgi-bin/carddisp.pl?gene=STAT5B</a>   |
| IL27    | Interleukin 27                                       | Protein Coding | 36 | GC16M036923 | 4.790442 | <a href="https://www.genecards.org/cgi-bin/carddisp.pl?gene=IL27">https://www.genecards.org/cgi-bin/carddisp.pl?gene=IL27</a>       |
| TBX21   | T-Box Transcription Factor 21                        | Protein Coding | 44 | GC17P047733 | 4.768191 | <a href="https://www.genecards.org/cgi-bin/carddisp.pl?gene=TBX21">https://www.genecards.org/cgi-bin/carddisp.pl?gene=TBX21</a>     |
| FGFR2   | Fibroblast Growth Factor Receptor 2                  | Protein Coding | 52 | GC10M121478 | 4.751418 | <a href="https://www.genecards.org/cgi-bin/carddisp.pl?gene=FGFR2">https://www.genecards.org/cgi-bin/carddisp.pl?gene=FGFR2</a>     |
| MDM2    | MDM2 Proto-Oncogene                                  | Protein Coding | 51 | GC12P068808 | 4.748178 | <a href="https://www.genecards.org/cgi-bin/carddisp.pl?gene=MDM2">https://www.genecards.org/cgi-bin/carddisp.pl?gene=MDM2</a>       |
| APOA1   | Apolipoprotein A1                                    | Protein Coding | 46 | GC11M116835 | 4.745225 | <a href="https://www.genecards.org/cgi-bin/carddisp.pl?gene=APOA1">https://www.genecards.org/cgi-bin/carddisp.pl?gene=APOA1</a>     |
| PDPN    | Podoplanin                                           | Protein Coding | 40 | GC01P013583 | 4.719225 | <a href="https://www.genecards.org/cgi-bin/carddisp.pl?gene=PDPN">https://www.genecards.org/cgi-bin/carddisp.pl?gene=PDPN</a>       |
| HLA-DOA | Major Histocompatibility Complex, Class II, DO Alpha | Protein Coding | 39 | GC06M033004 | 4.718634 | <a href="https://www.genecards.org/cgi-bin/carddisp.pl?gene=HLA-DOA">https://www.genecards.org/cgi-bin/carddisp.pl?gene=HLA-DOA</a> |
| MIR125A | MicroRNA 125a                                        | RNA Gene       | 22 | GC19P067235 | 4.701859 | <a href="https://www.genecards.org/cgi-bin/carddisp.pl?gene=MIR125A">https://www.genecards.org/cgi-bin/carddisp.pl?gene=MIR125A</a> |
| S100A4  | S100 Calcium Binding Protein A4                      | Protein Coding | 43 | GC01M153543 | 4.697592 | <a href="https://www.genecards.org/cgi-bin/carddisp.pl?gene=S100A4">https://www.genecards.org/cgi-bin/carddisp.pl?gene=S100A4</a>   |
| BRD2    | Bromodomain Containing 2                             | Protein Coding | 43 | GC06P083733 | 4.694026 | <a href="https://www.genecards.org/cgi-bin/carddisp.pl?gene=BRD2">https://www.genecards.org/cgi-bin/carddisp.pl?gene=BRD2</a>       |

|         |                                                        |                |    |             |          |                                                                                                                                     |
|---------|--------------------------------------------------------|----------------|----|-------------|----------|-------------------------------------------------------------------------------------------------------------------------------------|
| FLT1    | Fms Related Receptor Tyrosine Kinase 1                 | Protein Coding | 49 | GC13M028300 | 4.670346 | <a href="https://www.genecards.org/cgi-bin/carddisp.pl?gene=FLT1">https://www.genecards.org/cgi-bin/carddisp.pl?gene=FLT1</a>       |
| ADAR    | Adenosine Deaminase RNA Specific                       | Protein Coding | 43 | GC01M154582 | 4.662095 | <a href="https://www.genecards.org/cgi-bin/carddisp.pl?gene=ADAR">https://www.genecards.org/cgi-bin/carddisp.pl?gene=ADAR</a>       |
| CNDP2   | Carnosine Dipeptidase 2                                | Protein Coding | 41 | GC18P074495 | 4.65285  | <a href="https://www.genecards.org/cgi-bin/carddisp.pl?gene=CNDP2">https://www.genecards.org/cgi-bin/carddisp.pl?gene=CNDP2</a>     |
| CAV1    | Caveolin 1                                             | Protein Coding | 46 | GC07P116524 | 4.651944 | <a href="https://www.genecards.org/cgi-bin/carddisp.pl?gene=CAV1">https://www.genecards.org/cgi-bin/carddisp.pl?gene=CAV1</a>       |
| CYP1A2  | Cytochrome P450 Family 1 Subfamily A Member 2          | Protein Coding | 45 | GC15P074748 | 4.650348 | <a href="https://www.genecards.org/cgi-bin/carddisp.pl?gene=CYP1A2">https://www.genecards.org/cgi-bin/carddisp.pl?gene=CYP1A2</a>   |
| NTRK1   | Neurotrophic Receptor Tyrosine Kinase 1                | Protein Coding | 46 | GC01P156815 | 4.650138 | <a href="https://www.genecards.org/cgi-bin/carddisp.pl?gene=NTRK1">https://www.genecards.org/cgi-bin/carddisp.pl?gene=NTRK1</a>     |
| LGALS3  | Galectin 3                                             | Protein Coding | 43 | GC14P055124 | 4.642893 | <a href="https://www.genecards.org/cgi-bin/carddisp.pl?gene=LGALS3">https://www.genecards.org/cgi-bin/carddisp.pl?gene=LGALS3</a>   |
| PIP4K2C | Phosphatidylinositol-5-Phosphate 4-Kinase Type 2 Gamma | Protein Coding | 37 | GC12P057591 | 4.636696 | <a href="https://www.genecards.org/cgi-bin/carddisp.pl?gene=PIP4K2C">https://www.genecards.org/cgi-bin/carddisp.pl?gene=PIP4K2C</a> |
| COX5A   | Cytochrome C Oxidase Subunit 5A                        | Protein Coding | 42 | GC15M074919 | 4.629854 | <a href="https://www.genecards.org/cgi-bin/carddisp.pl?gene=COX5A">https://www.genecards.org/cgi-bin/carddisp.pl?gene=COX5A</a>     |
| IGFBP3  | Insulin Like Growth Factor Binding Protein 3           | Protein Coding | 44 | GC07M045912 | 4.626127 | <a href="https://www.genecards.org/cgi-bin/carddisp.pl?gene=IGFBP3">https://www.genecards.org/cgi-bin/carddisp.pl?gene=IGFBP3</a>   |
| IL1RL2  | Interleukin 1 Receptor Like 2                          | Protein Coding | 41 | GC02P102186 | 4.623078 | <a href="https://www.genecards.org/cgi-bin/carddisp.pl?gene=IL1RL2">https://www.genecards.org/cgi-bin/carddisp.pl?gene=IL1RL2</a>   |
| LGALS9  | Galectin 9                                             | Protein Coding | 38 | GC17P027629 | 4.622476 | <a href="https://www.genecards.org/cgi-bin/carddisp.pl?gene=LGALS9">https://www.genecards.org/cgi-bin/carddisp.pl?gene=LGALS9</a>   |
| H3C14   | H3 Clustered Histone 14                                | Protein Coding | 27 | GC01M152021 | 4.616464 | <a href="https://www.genecards.org/cgi-bin/carddisp.pl?gene=H3C14">https://www.genecards.org/cgi-bin/carddisp.pl?gene=H3C14</a>     |
| RAD51B  | RAD51 Paralog B                                        | Protein Coding | 36 | GC14P067819 | 4.597606 | <a href="https://www.genecards.org/cgi-bin/carddisp.pl?gene=RAD51B">https://www.genecards.org/cgi-bin/carddisp.pl?gene=RAD51B</a>   |



|         |                                                                                       |                |    |              |          |                                                                                                                                     |
|---------|---------------------------------------------------------------------------------------|----------------|----|--------------|----------|-------------------------------------------------------------------------------------------------------------------------------------|
|         |                                                                                       |                |    |              |          | <a href="#">bin/carddisp.pl?gene=RAD51B</a>                                                                                         |
| JAK1    | Janus Kinase 1                                                                        | Protein Coding | 51 | GC01M064833  | 4.586927 | <a href="https://www.genecards.org/cgi-bin/carddisp.pl?gene=JAK1">https://www.genecards.org/cgi-bin/carddisp.pl?gene=JAK1</a>       |
| MIR499A | MicroRNA 499a                                                                         | RNA Gene       | 22 | GC20P034990  | 4.585382 | <a href="https://www.genecards.org/cgi-bin/carddisp.pl?gene=MIR499A">https://www.genecards.org/cgi-bin/carddisp.pl?gene=MIR499A</a> |
| BLTP1   | Bridge-Like Lipid Transfer Protein Family Member 1                                    | Protein Coding | 26 | GC04P122154  | 4.580682 | <a href="https://www.genecards.org/cgi-bin/carddisp.pl?gene=BLTP1">https://www.genecards.org/cgi-bin/carddisp.pl?gene=BLTP1</a>     |
| CD81    | CD81 Molecule                                                                         | Protein Coding | 44 | GC11P002532  | 4.570866 | <a href="https://www.genecards.org/cgi-bin/carddisp.pl?gene=CD81">https://www.genecards.org/cgi-bin/carddisp.pl?gene=CD81</a>       |
| ADORA3  | Adenosine A3 Receptor                                                                 | Protein Coding | 44 | GC01M111499  | 4.561628 | <a href="https://www.genecards.org/cgi-bin/carddisp.pl?gene=ADORA3">https://www.genecards.org/cgi-bin/carddisp.pl?gene=ADORA3</a>   |
| CA2     | Carbonic Anhydrase 2                                                                  | Protein Coding | 49 | GC08P085463  | 4.554908 | <a href="https://www.genecards.org/cgi-bin/carddisp.pl?gene=CA2">https://www.genecards.org/cgi-bin/carddisp.pl?gene=CA2</a>         |
| KIR2DS2 | Killer Cell Immunoglobulin Like Receptor, Two Ig Domains And Short Cytoplasmic Tail 2 | Protein Coding | 25 | GC19M R00122 | 4.553277 | <a href="https://www.genecards.org/cgi-bin/carddisp.pl?gene=KIR2DS2">https://www.genecards.org/cgi-bin/carddisp.pl?gene=KIR2DS2</a> |
| RO60    | Ro60, Y RNA Binding Protein                                                           | Protein Coding | 29 | GC01P193059  | 4.552504 | <a href="https://www.genecards.org/cgi-bin/carddisp.pl?gene=RO60">https://www.genecards.org/cgi-bin/carddisp.pl?gene=RO60</a>       |
| LTB     | Lymphotoxin Beta                                                                      | Protein Coding | 38 | GC06M065959  | 4.551324 | <a href="https://www.genecards.org/cgi-bin/carddisp.pl?gene=LTB">https://www.genecards.org/cgi-bin/carddisp.pl?gene=LTB</a>         |
| COL1A2  | Collagen Type I Alpha 2 Chain                                                         | Protein Coding | 46 | GC07P094394  | 4.538369 | <a href="https://www.genecards.org/cgi-bin/carddisp.pl?gene=COL1A2">https://www.genecards.org/cgi-bin/carddisp.pl?gene=COL1A2</a>   |
| COL10A1 | Collagen Type X Alpha 1 Chain                                                         | Protein Coding | 41 | GC06M116118  | 4.536696 | <a href="https://www.genecards.org/cgi-bin/carddisp.pl?gene=COL10A1">https://www.genecards.org/cgi-bin/carddisp.pl?gene=COL10A1</a> |
| DCN     | Decorin                                                                               | Protein Coding | 45 | GC12M091140  | 4.536048 | <a href="https://www.genecards.org/cgi-bin/carddisp.pl?gene=DCN">https://www.genecards.org/cgi-bin/carddisp.pl?gene=DCN</a>         |
| PECAM1  | Platelet And Endothelial Cell Adhesion Molecule 1                                     | Protein Coding | 40 | GC17M064319  | 4.526588 | <a href="https://www.genecards.org/cgi-bin/carddisp.pl?gene=PECAM1">https://www.genecards.org/cgi-bin/carddisp.pl?gene=PECAM1</a>   |

|          |                                                            |                |    |             |          |                                                                                                                                              |
|----------|------------------------------------------------------------|----------------|----|-------------|----------|----------------------------------------------------------------------------------------------------------------------------------------------|
|          |                                                            |                |    |             |          | <a href="http://www.ncbi.nlm.nih.gov/ncbi/cdd/bin/carddisp.pl?gene=PECAM1">bin/carddisp.pl?gene=PECAM1</a>                                   |
| HLA-DQB2 | Major Histocompatibility Complex, Class II, DQ Beta 2      | Protein Coding | 38 | GC06M032756 | 4.519013 | <a href="http://www.ncbi.nlm.nih.gov/ncbi/cdd/bin/carddisp.pl?gene=HLA-DQB2">https://www.genecards.org/cgi-bin/carddisp.pl?gene=HLA-DQB2</a> |
| ACP1     | Acid Phosphatase 1                                         | Protein Coding | 42 | GC02P000344 | 4.517788 | <a href="http://www.ncbi.nlm.nih.gov/ncbi/cdd/bin/carddisp.pl?gene=ACP1">https://www.genecards.org/cgi-bin/carddisp.pl?gene=ACP1</a>         |
| CYP19A1  | Cytochrome P450 Family 19 Subfamily A Member 1             | Protein Coding | 47 | GC15M051208 | 4.512114 | <a href="http://www.ncbi.nlm.nih.gov/ncbi/cdd/bin/carddisp.pl?gene=CYP19A1">https://www.genecards.org/cgi-bin/carddisp.pl?gene=CYP19A1</a>   |
| CFHR2    | Complement Factor H Related 2                              | Protein Coding | 38 | GC01P196943 | 4.511574 | <a href="http://www.ncbi.nlm.nih.gov/ncbi/cdd/bin/carddisp.pl?gene=CFHR2">https://www.genecards.org/cgi-bin/carddisp.pl?gene=CFHR2</a>       |
| IL12RB1  | Interleukin 12 Receptor Subunit Beta 1                     | Protein Coding | 42 | GC19M018058 | 4.509627 | <a href="http://www.ncbi.nlm.nih.gov/ncbi/cdd/bin/carddisp.pl?gene=IL12RB1">https://www.genecards.org/cgi-bin/carddisp.pl?gene=IL12RB1</a>   |
| FTH1     | Ferritin Heavy Chain 1                                     | Protein Coding | 48 | GC11M061959 | 4.501761 | <a href="http://www.ncbi.nlm.nih.gov/ncbi/cdd/bin/carddisp.pl?gene=FTH1">https://www.genecards.org/cgi-bin/carddisp.pl?gene=FTH1</a>         |
| IKBKE    | Inhibitor Of Nuclear Factor Kappa B Kinase Subunit Epsilon | Protein Coding | 44 | GC01P206470 | 4.484868 | <a href="http://www.ncbi.nlm.nih.gov/ncbi/cdd/bin/carddisp.pl?gene=IKBKE">https://www.genecards.org/cgi-bin/carddisp.pl?gene=IKBKE</a>       |
| MIR143   | MicroRNA 143                                               | RNA Gene       | 25 | GC05P149410 | 4.473273 | <a href="http://www.ncbi.nlm.nih.gov/ncbi/cdd/bin/carddisp.pl?gene=MIR143">https://www.genecards.org/cgi-bin/carddisp.pl?gene=MIR143</a>     |
| LBP      | Lipopolysaccharide Binding Protein                         | Protein Coding | 42 | GC20P038346 | 4.469586 | <a href="http://www.ncbi.nlm.nih.gov/ncbi/cdd/bin/carddisp.pl?gene=LBP">https://www.genecards.org/cgi-bin/carddisp.pl?gene=LBP</a>           |
| DDR2     | Discoidin Domain Receptor Tyrosine Kinase 2                | Protein Coding | 49 | GC01P162631 | 4.465885 | <a href="http://www.ncbi.nlm.nih.gov/ncbi/cdd/bin/carddisp.pl?gene=DDR2">https://www.genecards.org/cgi-bin/carddisp.pl?gene=DDR2</a>         |
| CARD10   | Caspase Recruitment Domain Family Member 10                | Protein Coding | 39 | GC22M057585 | 4.451181 | <a href="http://www.ncbi.nlm.nih.gov/ncbi/cdd/bin/carddisp.pl?gene=CARD10">https://www.genecards.org/cgi-bin/carddisp.pl?gene=CARD10</a>     |
| CCL17    | C-C Motif Chemokine Ligand 17                              | Protein Coding | 38 | GC16P057414 | 4.444296 | <a href="http://www.ncbi.nlm.nih.gov/ncbi/cdd/bin/carddisp.pl?gene=CCL17">https://www.genecards.org/cgi-bin/carddisp.pl?gene=CCL17</a>       |
| SPTAN1   | Spectrin Alpha, Non-Erythrocytic 1                         | Protein Coding | 46 | GC09P128552 | 4.438413 | <a href="http://www.ncbi.nlm.nih.gov/ncbi/cdd/bin/carddisp.pl?gene=SPTAN1">https://www.genecards.org/cgi-bin/carddisp.pl?gene=SPTAN1</a>     |

|          |                                                       |                |    |             |          |                                                                                                                                       |
|----------|-------------------------------------------------------|----------------|----|-------------|----------|---------------------------------------------------------------------------------------------------------------------------------------|
| BDNF     | Brain Derived Neurotrophic Factor                     | Protein Coding | 46 | GC11M027654 | 4.437177 | <a href="https://www.genecards.org/cgi-bin/carddisp.pl?gene=BDNF">https://www.genecards.org/cgi-bin/carddisp.pl?gene=BDNF</a>         |
| NFATC1   | Nuclear Factor Of Activated T Cells 1                 | Protein Coding | 45 | GC18P079395 | 4.426399 | <a href="https://www.genecards.org/cgi-bin/carddisp.pl?gene=NFATC1">https://www.genecards.org/cgi-bin/carddisp.pl?gene=NFATC1</a>     |
| IL34     | Interleukin 34                                        | Protein Coding | 37 | GC16P071585 | 4.412497 | <a href="https://www.genecards.org/cgi-bin/carddisp.pl?gene=IL34">https://www.genecards.org/cgi-bin/carddisp.pl?gene=IL34</a>         |
| EEF1A1   | Eukaryotic Translation Elongation Factor 1 Alpha 1    | Protein Coding | 42 | GC06M073515 | 4.397603 | <a href="https://www.genecards.org/cgi-bin/carddisp.pl?gene=EEF1A1">https://www.genecards.org/cgi-bin/carddisp.pl?gene=EEF1A1</a>     |
| APRT     | Adenine Phosphoribosyltransferase                     | Protein Coding | 45 | GC16M088810 | 4.397479 | <a href="https://www.genecards.org/cgi-bin/carddisp.pl?gene=APRT">https://www.genecards.org/cgi-bin/carddisp.pl?gene=APRT</a>         |
| SUMO1    | Small Ubiquitin Like Modifier 1                       | Protein Coding | 44 | GC02M202206 | 4.394073 | <a href="https://www.genecards.org/cgi-bin/carddisp.pl?gene=SUMO1">https://www.genecards.org/cgi-bin/carddisp.pl?gene=SUMO1</a>       |
| TSBP1    | Testis Expressed Basic Protein 1                      | Protein Coding | 24 | GC06M032288 | 4.390658 | <a href="https://www.genecards.org/cgi-bin/carddisp.pl?gene=TSBP1">https://www.genecards.org/cgi-bin/carddisp.pl?gene=TSBP1</a>       |
| HLA-DRB5 | Major Histocompatibility Complex, Class II, DR Beta 5 | Protein Coding | 39 | GC06M066002 | 4.381423 | <a href="https://www.genecards.org/cgi-bin/carddisp.pl?gene=HLA-DRB5">https://www.genecards.org/cgi-bin/carddisp.pl?gene=HLA-DRB5</a> |
| FGF1     | Fibroblast Growth Factor 1                            | Protein Coding | 45 | GC05M142555 | 4.375101 | <a href="https://www.genecards.org/cgi-bin/carddisp.pl?gene=FGF1">https://www.genecards.org/cgi-bin/carddisp.pl?gene=FGF1</a>         |
| IL17D    | Interleukin 17D                                       | Protein Coding | 36 | GC13P020702 | 4.367647 | <a href="https://www.genecards.org/cgi-bin/carddisp.pl?gene=IL17D">https://www.genecards.org/cgi-bin/carddisp.pl?gene=IL17D</a>       |
| CENPB    | Centromere Protein B                                  | Protein Coding | 36 | GC20M003783 | 4.356783 | <a href="https://www.genecards.org/cgi-bin/carddisp.pl?gene=CENPB">https://www.genecards.org/cgi-bin/carddisp.pl?gene=CENPB</a>       |
| ATG5     | Autophagy Related 5                                   | Protein Coding | 42 | GC06M106045 | 4.350111 | <a href="https://www.genecards.org/cgi-bin/carddisp.pl?gene=ATG5">https://www.genecards.org/cgi-bin/carddisp.pl?gene=ATG5</a>         |
| CFH      | Complement Factor H                                   | Protein Coding | 45 | GC01P196621 | 4.343126 | <a href="https://www.genecards.org/cgi-bin/carddisp.pl?gene=CFH">https://www.genecards.org/cgi-bin/carddisp.pl?gene=CFH</a>           |
| RORC     | RAR Related Orphan Receptor C                         | Protein Coding | 43 | GC01M151806 | 4.32893  | <a href="https://www.genecards.org/cgi-bin/carddisp.pl?gene=RORC">https://www.genecards.org/cgi-bin/carddisp.pl?gene=RORC</a>         |

|        |                                         |                |    |             |          |                                                                                                                                          |
|--------|-----------------------------------------|----------------|----|-------------|----------|------------------------------------------------------------------------------------------------------------------------------------------|
|        |                                         |                |    |             |          | <a href="http://www.ncbi.nlm.nih.gov/ncbi/cdd/bin/carddisp.pl?gene=RORC">bin/carddisp.pl?gene=RORC</a>                                   |
| CD209  | CD209 Molecule                          | Protein Coding | 42 | GC19M007739 | 4.326128 | <a href="http://www.ncbi.nlm.nih.gov/ncbi/cdd/bin/carddisp.pl?gene=CD209">https://www.genecards.org/cgi-bin/carddisp.pl?gene=CD209</a>   |
| FCN2   | Ficolin 2                               | Protein Coding | 42 | GC09P134864 | 4.325276 | <a href="http://www.ncbi.nlm.nih.gov/ncbi/cdd/bin/carddisp.pl?gene=FCN2">https://www.genecards.org/cgi-bin/carddisp.pl?gene=FCN2</a>     |
| CD68   | CD68 Molecule                           | Protein Coding | 38 | GC17P007579 | 4.32193  | <a href="http://www.ncbi.nlm.nih.gov/ncbi/cdd/bin/carddisp.pl?gene=CD68">https://www.genecards.org/cgi-bin/carddisp.pl?gene=CD68</a>     |
| SLC2A9 | Solute Carrier Family 2 Member 9        | Protein Coding | 44 | GC04M009772 | 4.316371 | <a href="http://www.ncbi.nlm.nih.gov/ncbi/cdd/bin/carddisp.pl?gene=SLC2A9">https://www.genecards.org/cgi-bin/carddisp.pl?gene=SLC2A9</a> |
| COG6   | Component Of Oligomeric Golgi Complex 6 | Protein Coding | 38 | GC13P039655 | 4.313921 | <a href="http://www.ncbi.nlm.nih.gov/ncbi/cdd/bin/carddisp.pl?gene=COG6">https://www.genecards.org/cgi-bin/carddisp.pl?gene=COG6</a>     |
| TLR8   | Toll Like Receptor 8                    | Protein Coding | 46 | GC0XP012924 | 4.307923 | <a href="http://www.ncbi.nlm.nih.gov/ncbi/cdd/bin/carddisp.pl?gene=TLR8">https://www.genecards.org/cgi-bin/carddisp.pl?gene=TLR8</a>     |
| SIRT1  | Sirtuin 1                               | Protein Coding | 46 | GC10P067884 | 4.305996 | <a href="http://www.ncbi.nlm.nih.gov/ncbi/cdd/bin/carddisp.pl?gene=SIRT1">https://www.genecards.org/cgi-bin/carddisp.pl?gene=SIRT1</a>   |
| GSN    | Gelsolin                                | Protein Coding | 46 | GC09P121201 | 4.298401 | <a href="http://www.ncbi.nlm.nih.gov/ncbi/cdd/bin/carddisp.pl?gene=GSN">https://www.genecards.org/cgi-bin/carddisp.pl?gene=GSN</a>       |
| GGT1   | Gamma-Glutamyltransferase 1             | Protein Coding | 48 | GC22P024583 | 4.295577 | <a href="http://www.ncbi.nlm.nih.gov/ncbi/cdd/bin/carddisp.pl?gene=GGT1">https://www.genecards.org/cgi-bin/carddisp.pl?gene=GGT1</a>     |
| IDO1   | Indoleamine 2,3-Dioxygenase 1           | Protein Coding | 43 | GC08P039891 | 4.293201 | <a href="http://www.ncbi.nlm.nih.gov/ncbi/cdd/bin/carddisp.pl?gene=IDO1">https://www.genecards.org/cgi-bin/carddisp.pl?gene=IDO1</a>     |
| ADAM10 | ADAM Metallopeptidase Domain 10         | Protein Coding | 50 | GC15M058588 | 4.287847 | <a href="http://www.ncbi.nlm.nih.gov/ncbi/cdd/bin/carddisp.pl?gene=ADAM10">https://www.genecards.org/cgi-bin/carddisp.pl?gene=ADAM10</a> |
| IFNA2  | Interferon Alpha 2                      | Protein Coding | 41 | GC09M021384 | 4.281237 | <a href="http://www.ncbi.nlm.nih.gov/ncbi/cdd/bin/carddisp.pl?gene=IFNA2">https://www.genecards.org/cgi-bin/carddisp.pl?gene=IFNA2</a>   |
| KDR    | Kinase Insert Domain Receptor           | Protein Coding | 51 | GC04M055078 | 4.277594 | <a href="http://www.ncbi.nlm.nih.gov/ncbi/cdd/bin/carddisp.pl?gene=KDR">https://www.genecards.org/cgi-bin/carddisp.pl?gene=KDR</a>       |

|          |                                         |                |    |             |          |                                                                                                                                       |
|----------|-----------------------------------------|----------------|----|-------------|----------|---------------------------------------------------------------------------------------------------------------------------------------|
| IGHE     | Immunoglobulin Heavy Constant Epsilon   | Protein Coding | 30 | GC14M112707 | 4.276135 | <a href="https://www.genecards.org/cgi-bin/carddisp.pl?gene=IGHE">https://www.genecards.org/cgi-bin/carddisp.pl?gene=IGHE</a>         |
| DNTT     | DNA Nucleotidylexotransferase           | Protein Coding | 40 | GC10P096304 | 4.272124 | <a href="https://www.genecards.org/cgi-bin/carddisp.pl?gene=DNTT">https://www.genecards.org/cgi-bin/carddisp.pl?gene=DNTT</a>         |
| CD70     | CD70 Molecule                           | Protein Coding | 41 | GC19M006647 | 4.270958 | <a href="https://www.genecards.org/cgi-bin/carddisp.pl?gene=CD70">https://www.genecards.org/cgi-bin/carddisp.pl?gene=CD70</a>         |
| CCL22    | C-C Motif Chemokine Ligand 22           | Protein Coding | 36 | GC16P057359 | 4.266844 | <a href="https://www.genecards.org/cgi-bin/carddisp.pl?gene=CCL22">https://www.genecards.org/cgi-bin/carddisp.pl?gene=CCL22</a>       |
| PRDX5    | Peroxiredoxin 5                         | Protein Coding | 43 | GC11P064370 | 4.266634 | <a href="https://www.genecards.org/cgi-bin/carddisp.pl?gene=PRDX5">https://www.genecards.org/cgi-bin/carddisp.pl?gene=PRDX5</a>       |
| TSLP     | Thymic Stromal Lymphopoietin            | Protein Coding | 37 | GC05P111070 | 4.266327 | <a href="https://www.genecards.org/cgi-bin/carddisp.pl?gene=TSLP">https://www.genecards.org/cgi-bin/carddisp.pl?gene=TSLP</a>         |
| NAGLU    | N-Acetyl-Alpha-Glucosaminidase          | Protein Coding | 41 | GC17P055669 | 4.265631 | <a href="https://www.genecards.org/cgi-bin/carddisp.pl?gene=NAGLU">https://www.genecards.org/cgi-bin/carddisp.pl?gene=NAGLU</a>       |
| ADAD1    | Adenosine Deaminase Domain Containing 1 | Protein Coding | 36 | GC04P122378 | 4.263219 | <a href="https://www.genecards.org/cgi-bin/carddisp.pl?gene=ADAD1">https://www.genecards.org/cgi-bin/carddisp.pl?gene=ADAD1</a>       |
| SERPINC1 | Serpin Family C Member 1                | Protein Coding | 47 | GC01M174559 | 4.260211 | <a href="https://www.genecards.org/cgi-bin/carddisp.pl?gene=SERPINC1">https://www.genecards.org/cgi-bin/carddisp.pl?gene=SERPINC1</a> |
| EPCAM    | Epithelial Cell Adhesion Molecule       | Protein Coding | 46 | GC02P047345 | 4.25868  | <a href="https://www.genecards.org/cgi-bin/carddisp.pl?gene=EPCAM">https://www.genecards.org/cgi-bin/carddisp.pl?gene=EPCAM</a>       |
| CSN1S1   | Casein Alpha S1                         | Protein Coding | 36 | GC04P069932 | 4.255772 | <a href="https://www.genecards.org/cgi-bin/carddisp.pl?gene=CSN1S1">https://www.genecards.org/cgi-bin/carddisp.pl?gene=CSN1S1</a>     |
| IL15RA   | Interleukin 15 Receptor Subunit Alpha   | Protein Coding | 39 | GC10M005943 | 4.250093 | <a href="https://www.genecards.org/cgi-bin/carddisp.pl?gene=IL15RA">https://www.genecards.org/cgi-bin/carddisp.pl?gene=IL15RA</a>     |
| IL24     | Interleukin 24                          | Protein Coding | 39 | GC01P206897 | 4.243191 | <a href="https://www.genecards.org/cgi-bin/carddisp.pl?gene=IL24">https://www.genecards.org/cgi-bin/carddisp.pl?gene=IL24</a>         |
| CCR8     | C-C Motif Chemokine Receptor 8          | Protein Coding | 41 | GC03P039886 | 4.226926 | <a href="https://www.genecards.org/cgi-">https://www.genecards.org/cgi-</a>                                                           |

|         |                                                                    |                |    |             |          |                                                                                                                                            |
|---------|--------------------------------------------------------------------|----------------|----|-------------|----------|--------------------------------------------------------------------------------------------------------------------------------------------|
|         |                                                                    |                |    |             |          | <a href="http://www.ncbi.nlm.nih.gov/ncbi/cdd/bin/carddisp.pl?gene=CCR8">bin/carddisp.pl?gene=CCR8</a>                                     |
| UBA1    | Ubiquitin Like Modifier Activating Enzyme 1                        | Protein Coding | 45 | GC0XP047190 | 4.226644 | <a href="http://www.ncbi.nlm.nih.gov/ncbi/cdd/bin/carddisp.pl?gene=UBA1">https://www.genecards.org/cgi-bin/carddisp.pl?gene=UBA1</a>       |
| ALOX15  | Arachidonate 15-Lipoxygenase                                       | Protein Coding | 44 | GC17M004630 | 4.225246 | <a href="http://www.ncbi.nlm.nih.gov/ncbi/cdd/bin/carddisp.pl?gene=ALOX15">https://www.genecards.org/cgi-bin/carddisp.pl?gene=ALOX15</a>   |
| CFB     | Complement Factor B                                                | Protein Coding | 45 | GC06P031945 | 4.203203 | <a href="http://www.ncbi.nlm.nih.gov/ncbi/cdd/bin/carddisp.pl?gene=CFB">https://www.genecards.org/cgi-bin/carddisp.pl?gene=CFB</a>         |
| LSM2    | LSM2 Homolog, U6 Small Nuclear RNA And MRNA Degradation Associated | Protein Coding | 38 | GC06M065974 | 4.192565 | <a href="http://www.ncbi.nlm.nih.gov/ncbi/cdd/bin/carddisp.pl?gene=LSM2">https://www.genecards.org/cgi-bin/carddisp.pl?gene=LSM2</a>       |
| TYR     | Tyrosinase                                                         | Protein Coding | 46 | GC11P089177 | 4.188845 | <a href="http://www.ncbi.nlm.nih.gov/ncbi/cdd/bin/carddisp.pl?gene=TYR">https://www.genecards.org/cgi-bin/carddisp.pl?gene=TYR</a>         |
| CD1D    | CD1d Molecule                                                      | Protein Coding | 42 | GC01P158178 | 4.188049 | <a href="http://www.ncbi.nlm.nih.gov/ncbi/cdd/bin/carddisp.pl?gene=CD1D">https://www.genecards.org/cgi-bin/carddisp.pl?gene=CD1D</a>       |
| PVT1    | Pvt1 Oncogene                                                      | RNA Gene       | 26 | GC08P127869 | 4.187071 | <a href="http://www.ncbi.nlm.nih.gov/ncbi/cdd/bin/carddisp.pl?gene=PVT1">https://www.genecards.org/cgi-bin/carddisp.pl?gene=PVT1</a>       |
| RARRES2 | Retinoic Acid Receptor Responder 2                                 | Protein Coding | 38 | GC07M150333 | 4.179746 | <a href="http://www.ncbi.nlm.nih.gov/ncbi/cdd/bin/carddisp.pl?gene=RARRES2">https://www.genecards.org/cgi-bin/carddisp.pl?gene=RARRES2</a> |
| ATOD1   | Dermatitis, Atopic                                                 | Genetic Locus  | 2  | GC03U902187 | 4.165978 | <a href="http://www.ncbi.nlm.nih.gov/ncbi/cdd/bin/carddisp.pl?gene=ATOD1">https://www.genecards.org/cgi-bin/carddisp.pl?gene=ATOD1</a>     |
| ATOD3   | Dermatitis, Atopic, 3                                              | Genetic Locus  | 2  | GC20U990080 | 4.165978 | <a href="http://www.ncbi.nlm.nih.gov/ncbi/cdd/bin/carddisp.pl?gene=ATOD3">https://www.genecards.org/cgi-bin/carddisp.pl?gene=ATOD3</a>     |
| ATOD5   | Dermatitis, Atopic, 5                                              | Genetic Locus  | 2  | GC13U900216 | 4.165978 | <a href="http://www.ncbi.nlm.nih.gov/ncbi/cdd/bin/carddisp.pl?gene=ATOD5">https://www.genecards.org/cgi-bin/carddisp.pl?gene=ATOD5</a>     |
| ATOD6   | Dermatitis, Atopic, 6                                              | Genetic Locus  | 2  | GC05U990174 | 4.165978 | <a href="http://www.ncbi.nlm.nih.gov/ncbi/cdd/bin/carddisp.pl?gene=ATOD6">https://www.genecards.org/cgi-bin/carddisp.pl?gene=ATOD6</a>     |
| DPEP1   | Dipeptidase 1                                                      | Protein Coding | 41 | GC16P089613 | 4.158097 | <a href="http://www.ncbi.nlm.nih.gov/ncbi/cdd/bin/carddisp.pl?gene=DPEP1">https://www.genecards.org/cgi-bin/carddisp.pl?gene=DPEP1</a>     |

|          |                                                                 |                |    |             |          |                                                                                                                                       |
|----------|-----------------------------------------------------------------|----------------|----|-------------|----------|---------------------------------------------------------------------------------------------------------------------------------------|
| GBA      | Glucosylceramidase Beta                                         | Protein Coding | 48 | GC01M155234 | 4.15247  | <a href="https://www.genecards.org/cgi-bin/carddisp.pl?gene=GBA">https://www.genecards.org/cgi-bin/carddisp.pl?gene=GBA</a>           |
| HRH4     | Histamine Receptor H4                                           | Protein Coding | 44 | GC18P024460 | 4.148339 | <a href="https://www.genecards.org/cgi-bin/carddisp.pl?gene=HRH4">https://www.genecards.org/cgi-bin/carddisp.pl?gene=HRH4</a>         |
| NEAT1    | Nuclear Paraspeckle Assembly Transcript 1                       | RNA Gene       | 24 | GC11P069943 | 4.134098 | <a href="https://www.genecards.org/cgi-bin/carddisp.pl?gene=NEAT1">https://www.genecards.org/cgi-bin/carddisp.pl?gene=NEAT1</a>       |
| THBS1    | Thrombospondin 1                                                | Protein Coding | 44 | GC15P039581 | 4.133282 | <a href="https://www.genecards.org/cgi-bin/carddisp.pl?gene=THBS1">https://www.genecards.org/cgi-bin/carddisp.pl?gene=THBS1</a>       |
| PDGFB    | Platelet Derived Growth Factor Subunit B                        | Protein Coding | 47 | GC22M058085 | 4.116092 | <a href="https://www.genecards.org/cgi-bin/carddisp.pl?gene=PDGFB">https://www.genecards.org/cgi-bin/carddisp.pl?gene=PDGFB</a>       |
| CCL26    | C-C Motif Chemokine Ligand 26                                   | Protein Coding | 36 | GC07M075769 | 4.114658 | <a href="https://www.genecards.org/cgi-bin/carddisp.pl?gene=CCL26">https://www.genecards.org/cgi-bin/carddisp.pl?gene=CCL26</a>       |
| MEG3     | Maternally Expressed 3                                          | RNA Gene       | 29 | GC14P109962 | 4.104683 | <a href="https://www.genecards.org/cgi-bin/carddisp.pl?gene=MEG3">https://www.genecards.org/cgi-bin/carddisp.pl?gene=MEG3</a>         |
| ADAMTS12 | ADAM Metallopeptidase With Thrombospondin Type 1 Motif 12       | Protein Coding | 40 | GC05M033524 | 4.10342  | <a href="https://www.genecards.org/cgi-bin/carddisp.pl?gene=ADAMTS12">https://www.genecards.org/cgi-bin/carddisp.pl?gene=ADAMTS12</a> |
| TNFRSF8  | TNF Receptor Superfamily Member 8                               | Protein Coding | 41 | GC01P012063 | 4.098128 | <a href="https://www.genecards.org/cgi-bin/carddisp.pl?gene=TNFRSF8">https://www.genecards.org/cgi-bin/carddisp.pl?gene=TNFRSF8</a>   |
| CHUK     | Component Of Inhibitor Of Nuclear Factor Kappa B Kinase Complex | Protein Coding | 49 | GC10M100188 | 4.098116 | <a href="https://www.genecards.org/cgi-bin/carddisp.pl?gene=CHUK">https://www.genecards.org/cgi-bin/carddisp.pl?gene=CHUK</a>         |
| LGALS2   | Galectin 2                                                      | Protein Coding | 40 | GC22M037570 | 4.093354 | <a href="https://www.genecards.org/cgi-bin/carddisp.pl?gene=LGALS2">https://www.genecards.org/cgi-bin/carddisp.pl?gene=LGALS2</a>     |
| ABCC1    | ATP Binding Cassette Subfamily C Member 1                       | Protein Coding | 47 | GC16P015949 | 4.084396 | <a href="https://www.genecards.org/cgi-bin/carddisp.pl?gene=ABCC1">https://www.genecards.org/cgi-bin/carddisp.pl?gene=ABCC1</a>       |
| ADGRE5   | Adhesion G Protein-Coupled Receptor E5                          | Protein Coding | 38 | GC19P014392 | 4.077285 | <a href="https://www.genecards.org/cgi-bin/carddisp.pl?gene=ADGRE5">https://www.genecards.org/cgi-bin/carddisp.pl?gene=ADGRE5</a>     |

|        |                                                                          |                   |    |                 |              |                                                                                                                                   |
|--------|--------------------------------------------------------------------------|-------------------|----|-----------------|--------------|-----------------------------------------------------------------------------------------------------------------------------------|
| YDJC   | YdjC<br>Chitooligosaccharide<br>Deacetylase Homolog                      | Protein<br>Coding | 32 | GC22M<br>021628 | 4.067<br>303 | <a href="https://www.genecards.org/cgi-bin/carddisp.pl?gene=YDJC">https://www.genecards.org/cgi-bin/carddisp.pl?gene=YDJC</a>     |
| TPO    | Thyroid Peroxidase                                                       | Protein<br>Coding | 47 | GC02P<br>001374 | 4.065<br>034 | <a href="https://www.genecards.org/cgi-bin/carddisp.pl?gene=TPO">https://www.genecards.org/cgi-bin/carddisp.pl?gene=TPO</a>       |
| CXCR1  | C-X-C Motif Chemokine<br>Receptor 1                                      | Protein<br>Coding | 41 | GC02M<br>218162 | 4.063<br>628 | <a href="https://www.genecards.org/cgi-bin/carddisp.pl?gene=CXCR1">https://www.genecards.org/cgi-bin/carddisp.pl?gene=CXCR1</a>   |
| COL5A2 | Collagen Type V Alpha 2<br>Chain                                         | Protein<br>Coding | 42 | GC02M<br>189031 | 4.055<br>742 | <a href="https://www.genecards.org/cgi-bin/carddisp.pl?gene=COL5A2">https://www.genecards.org/cgi-bin/carddisp.pl?gene=COL5A2</a> |
| NT5E   | 5'-Nucleotidase Ecto                                                     | Protein<br>Coding | 49 | GC06P<br>085449 | 4.054<br>715 | <a href="https://www.genecards.org/cgi-bin/carddisp.pl?gene=NT5E">https://www.genecards.org/cgi-bin/carddisp.pl?gene=NT5E</a>     |
| GTF2I  | General Transcription<br>Factor Iii                                      | Protein<br>Coding | 40 | GC07P<br>075448 | 4.054<br>162 | <a href="https://www.genecards.org/cgi-bin/carddisp.pl?gene=GTF2I">https://www.genecards.org/cgi-bin/carddisp.pl?gene=GTF2I</a>   |
| LBH    | LBH Regulator Of WNT<br>Signaling Pathway                                | Protein<br>Coding | 34 | GC02P<br>030231 | 4.052<br>624 | <a href="https://www.genecards.org/cgi-bin/carddisp.pl?gene=LBH">https://www.genecards.org/cgi-bin/carddisp.pl?gene=LBH</a>       |
| POU3F1 | POU Class 3 Homeobox 1                                                   | Protein<br>Coding | 37 | GC01M<br>038095 | 4.051<br>453 | <a href="https://www.genecards.org/cgi-bin/carddisp.pl?gene=POU3F1">https://www.genecards.org/cgi-bin/carddisp.pl?gene=POU3F1</a> |
| ANPEP  | Alanyl Aminopeptidase,<br>Membrane                                       | Protein<br>Coding | 48 | GC15M<br>089784 | 4.039<br>893 | <a href="https://www.genecards.org/cgi-bin/carddisp.pl?gene=ANPEP">https://www.genecards.org/cgi-bin/carddisp.pl?gene=ANPEP</a>   |
| LCK    | LCK Proto-Oncogene, Src<br>Family Tyrosine Kinase                        | Protein<br>Coding | 50 | GC01P<br>032251 | 4.039<br>072 | <a href="https://www.genecards.org/cgi-bin/carddisp.pl?gene=LCK">https://www.genecards.org/cgi-bin/carddisp.pl?gene=LCK</a>       |
| B3GNT2 | UDP-GlcNAc:BetaGal<br>Beta-1,3-N-<br>Acetylglucosaminyltransfe<br>rase 2 | Protein<br>Coding | 38 | GC02P<br>062196 | 4.034<br>41  | <a href="https://www.genecards.org/cgi-bin/carddisp.pl?gene=B3GNT2">https://www.genecards.org/cgi-bin/carddisp.pl?gene=B3GNT2</a> |
| IGF1R  | Insulin Like Growth<br>Factor 1 Receptor                                 | Protein<br>Coding | 52 | GC15P<br>098648 | 4.034<br>027 | <a href="https://www.genecards.org/cgi-bin/carddisp.pl?gene=IGF1R">https://www.genecards.org/cgi-bin/carddisp.pl?gene=IGF1R</a>   |
| ADRB3  | Adrenoceptor Beta 3                                                      | Protein<br>Coding | 43 | GC08M<br>037962 | 4.005<br>707 | <a href="https://www.genecards.org/cgi-bin/carddisp.pl?gene=ADRB3">https://www.genecards.org/cgi-bin/carddisp.pl?gene=ADRB3</a>   |
| WDFY4  | WDFY Family Member 4                                                     | Protein<br>Coding | 34 | GC10P<br>048684 | 4.004<br>28  | <a href="https://www.genecards.org/cgi-bin/carddisp.pl?gene=WDFY4">https://www.genecards.org/cgi-bin/carddisp.pl?gene=WDFY4</a>   |



|        |                                                   |                |    |             |          |                                                                                                                                          |
|--------|---------------------------------------------------|----------------|----|-------------|----------|------------------------------------------------------------------------------------------------------------------------------------------|
|        |                                                   |                |    |             |          | <a href="http://www.ncbi.nlm.nih.gov/ncbi/cdd/bin/carddisp.pl?gene=WDFY4">bin/carddisp.pl?gene=WDFY4</a>                                 |
| PTPN12 | Protein Tyrosine Phosphatase Non-Receptor Type 12 | Protein Coding | 46 | GC07P077537 | 4.002909 | <a href="http://www.ncbi.nlm.nih.gov/ncbi/cdd/bin/carddisp.pl?gene=PTPN12">https://www.genecards.org/cgi-bin/carddisp.pl?gene=PTPN12</a> |
| RHOA   | Ras Homolog Family Member A                       | Protein Coding | 46 | GC03M049359 | 3.999915 | <a href="http://www.ncbi.nlm.nih.gov/ncbi/cdd/bin/carddisp.pl?gene=RHOA">https://www.genecards.org/cgi-bin/carddisp.pl?gene=RHOA</a>     |
| PGF    | Placental Growth Factor                           | Protein Coding | 41 | GC14M074941 | 3.988466 | <a href="http://www.ncbi.nlm.nih.gov/ncbi/cdd/bin/carddisp.pl?gene=PGF">https://www.genecards.org/cgi-bin/carddisp.pl?gene=PGF</a>       |
| COL9A1 | Collagen Type IX Alpha 1 Chain                    | Protein Coding | 41 | GC06M070215 | 3.982416 | <a href="http://www.ncbi.nlm.nih.gov/ncbi/cdd/bin/carddisp.pl?gene=COL9A1">https://www.genecards.org/cgi-bin/carddisp.pl?gene=COL9A1</a> |
| CD38   | CD38 Molecule                                     | Protein Coding | 44 | GC04P018197 | 3.981544 | <a href="http://www.ncbi.nlm.nih.gov/ncbi/cdd/bin/carddisp.pl?gene=CD38">https://www.genecards.org/cgi-bin/carddisp.pl?gene=CD38</a>     |
| PDGFRB | Platelet Derived Growth Factor Receptor Beta      | Protein Coding | 52 | GC05M150113 | 3.979126 | <a href="http://www.ncbi.nlm.nih.gov/ncbi/cdd/bin/carddisp.pl?gene=PDGFRB">https://www.genecards.org/cgi-bin/carddisp.pl?gene=PDGFRB</a> |
| IFI16  | Interferon Gamma Inducible Protein 16             | Protein Coding | 41 | GC01P158969 | 3.950812 | <a href="http://www.ncbi.nlm.nih.gov/ncbi/cdd/bin/carddisp.pl?gene=IFI16">https://www.genecards.org/cgi-bin/carddisp.pl?gene=IFI16</a>   |
| MBP    | Myelin Basic Protein                              | Protein Coding | 44 | GC18M076978 | 3.950043 | <a href="http://www.ncbi.nlm.nih.gov/ncbi/cdd/bin/carddisp.pl?gene=MBP">https://www.genecards.org/cgi-bin/carddisp.pl?gene=MBP</a>       |
| MET    | MET Proto-Oncogene, Receptor Tyrosine Kinase      | Protein Coding | 51 | GC07P116672 | 3.946303 | <a href="http://www.ncbi.nlm.nih.gov/ncbi/cdd/bin/carddisp.pl?gene=MET">https://www.genecards.org/cgi-bin/carddisp.pl?gene=MET</a>       |
| TIMP3  | TIMP Metallopeptidase Inhibitor 3                 | Protein Coding | 43 | GC22P036985 | 3.945199 | <a href="http://www.ncbi.nlm.nih.gov/ncbi/cdd/bin/carddisp.pl?gene=TIMP3">https://www.genecards.org/cgi-bin/carddisp.pl?gene=TIMP3</a>   |
| GJB6   | Gap Junction Protein Beta 6                       | Protein Coding | 42 | GC13M020221 | 3.939862 | <a href="http://www.ncbi.nlm.nih.gov/ncbi/cdd/bin/carddisp.pl?gene=GJB6">https://www.genecards.org/cgi-bin/carddisp.pl?gene=GJB6</a>     |
| CREM   | CAMP Responsive Element Modulator                 | Protein Coding | 40 | GC10P035126 | 3.939312 | <a href="http://www.ncbi.nlm.nih.gov/ncbi/cdd/bin/carddisp.pl?gene=CREM">https://www.genecards.org/cgi-bin/carddisp.pl?gene=CREM</a>     |
| FADD   | Fas Associated Via Death Domain                   | Protein Coding | 44 | GC11P070203 | 3.923491 | <a href="http://www.ncbi.nlm.nih.gov/ncbi/cdd/bin/carddisp.pl?gene=FADD">https://www.genecards.org/cgi-bin/carddisp.pl?gene=FADD</a>     |

|           |                                               |                |    |             |          |                                                                                                                                         |
|-----------|-----------------------------------------------|----------------|----|-------------|----------|-----------------------------------------------------------------------------------------------------------------------------------------|
| SAAL1     | Serum Amyloid A Like 1                        | Protein Coding | 32 | GC11M018069 | 3.923332 | <a href="https://www.genecards.org/cgi-bin/carddisp.pl?gene=SAAL1">https://www.genecards.org/cgi-bin/carddisp.pl?gene=SAAL1</a>         |
| SMAD2     | SMAD Family Member 2                          | Protein Coding | 48 | GC18M047809 | 3.923233 | <a href="https://www.genecards.org/cgi-bin/carddisp.pl?gene=SMAD2">https://www.genecards.org/cgi-bin/carddisp.pl?gene=SMAD2</a>         |
| C5AR1     | Complement C5a Receptor 1                     | Protein Coding | 42 | GC19P047290 | 3.919319 | <a href="https://www.genecards.org/cgi-bin/carddisp.pl?gene=C5AR1">https://www.genecards.org/cgi-bin/carddisp.pl?gene=C5AR1</a>         |
| SPARC     | Secreted Protein Acidic And Cysteine Rich     | Protein Coding | 48 | GC05M151661 | 3.917453 | <a href="https://www.genecards.org/cgi-bin/carddisp.pl?gene=SPARC">https://www.genecards.org/cgi-bin/carddisp.pl?gene=SPARC</a>         |
| RPA3      | Replication Protein A3                        | Protein Coding | 40 | GC07M008189 | 3.91256  | <a href="https://www.genecards.org/cgi-bin/carddisp.pl?gene=RPA3">https://www.genecards.org/cgi-bin/carddisp.pl?gene=RPA3</a>           |
| TDRKH     | Tudor And KH Domain Containing                | Protein Coding | 38 | GC01M152176 | 3.91256  | <a href="https://www.genecards.org/cgi-bin/carddisp.pl?gene=TDRKH">https://www.genecards.org/cgi-bin/carddisp.pl?gene=TDRKH</a>         |
| CSK       | C-Terminal Src Kinase                         | Protein Coding | 45 | GC15P074782 | 3.907964 | <a href="https://www.genecards.org/cgi-bin/carddisp.pl?gene=CSK">https://www.genecards.org/cgi-bin/carddisp.pl?gene=CSK</a>             |
| PGR       | Progesterone Receptor                         | Protein Coding | 47 | GC11M101030 | 3.907366 | <a href="https://www.genecards.org/cgi-bin/carddisp.pl?gene=PGR">https://www.genecards.org/cgi-bin/carddisp.pl?gene=PGR</a>             |
| COMT      | Catechol-O-Methyltransferase                  | Protein Coding | 49 | GC22P019941 | 3.90366  | <a href="https://www.genecards.org/cgi-bin/carddisp.pl?gene=COMT">https://www.genecards.org/cgi-bin/carddisp.pl?gene=COMT</a>           |
| HNRNPA2B1 | Heterogeneous Nuclear Ribonucleoprotein A2/B1 | Protein Coding | 44 | GC07M026174 | 3.90366  | <a href="https://www.genecards.org/cgi-bin/carddisp.pl?gene=HNRNPA2B1">https://www.genecards.org/cgi-bin/carddisp.pl?gene=HNRNPA2B1</a> |
| XBP1      | X-Box Binding Protein 1                       | Protein Coding | 44 | GC22M028794 | 3.90287  | <a href="https://www.genecards.org/cgi-bin/carddisp.pl?gene=XBP1">https://www.genecards.org/cgi-bin/carddisp.pl?gene=XBP1</a>           |
| TCF3      | Transcription Factor 3                        | Protein Coding | 43 | GC19M001609 | 3.902445 | <a href="https://www.genecards.org/cgi-bin/carddisp.pl?gene=TCF3">https://www.genecards.org/cgi-bin/carddisp.pl?gene=TCF3</a>           |
| F13A1     | Coagulation Factor XIII A Chain               | Protein Coding | 45 | GC06M006144 | 3.898983 | <a href="https://www.genecards.org/cgi-bin/carddisp.pl?gene=F13A1">https://www.genecards.org/cgi-bin/carddisp.pl?gene=F13A1</a>         |
| TGFB2     | Transforming Growth Factor Beta 2             | Protein Coding | 49 | GC01P218345 | 3.89617  | <a href="https://www.genecards.org/cgi-">https://www.genecards.org/cgi-</a>                                                             |

|           |                                                                                      |                |    |             |          |                                                                                                                                         |
|-----------|--------------------------------------------------------------------------------------|----------------|----|-------------|----------|-----------------------------------------------------------------------------------------------------------------------------------------|
|           |                                                                                      |                |    |             |          | <a href="#">bin/carddisp.pl?gene=TGFB2</a>                                                                                              |
| NFE2L2    | NFE2 Like BZIP Transcription Factor 2                                                | Protein Coding | 48 | GC02M177227 | 3.889893 | <a href="https://www.genecards.org/cgi-bin/carddisp.pl?gene=NFE2L2">https://www.genecards.org/cgi-bin/carddisp.pl?gene=NFE2L2</a>       |
| LINC01104 | Long Intergenic Non-Protein Coding RNA 1104                                          | RNA Gene       | 14 | GC02P100208 | 3.885221 | <a href="https://www.genecards.org/cgi-bin/carddisp.pl?gene=LINC01104">https://www.genecards.org/cgi-bin/carddisp.pl?gene=LINC01104</a> |
| TEC       | Tec Protein Tyrosine Kinase                                                          | Protein Coding | 44 | GC04M048150 | 3.884967 | <a href="https://www.genecards.org/cgi-bin/carddisp.pl?gene=TEC">https://www.genecards.org/cgi-bin/carddisp.pl?gene=TEC</a>             |
| FAM167A   | Family With Sequence Similarity 167 Member A                                         | Protein Coding | 34 | GC08M011421 | 3.88454  | <a href="https://www.genecards.org/cgi-bin/carddisp.pl?gene=FAM167A">https://www.genecards.org/cgi-bin/carddisp.pl?gene=FAM167A</a>     |
| KIR2DL3   | Killer Cell Immunoglobulin Like Receptor, Two Ig Domains And Long Cytoplasmic Tail 3 | Protein Coding | 36 | GC19P068014 | 3.877167 | <a href="https://www.genecards.org/cgi-bin/carddisp.pl?gene=KIR2DL3">https://www.genecards.org/cgi-bin/carddisp.pl?gene=KIR2DL3</a>     |
| DUSP1     | Dual Specificity Phosphatase 1                                                       | Protein Coding | 45 | GC05M172768 | 3.876289 | <a href="https://www.genecards.org/cgi-bin/carddisp.pl?gene=DUSP1">https://www.genecards.org/cgi-bin/carddisp.pl?gene=DUSP1</a>         |
| LIN54     | Lin-54 DREAM MuvB Core Complex Component                                             | Protein Coding | 36 | GC04M082909 | 3.87335  | <a href="https://www.genecards.org/cgi-bin/carddisp.pl?gene=LIN54">https://www.genecards.org/cgi-bin/carddisp.pl?gene=LIN54</a>         |
| ZNF354A   | Zinc Finger Protein 354A                                                             | Protein Coding | 36 | GC05M178711 | 3.87335  | <a href="https://www.genecards.org/cgi-bin/carddisp.pl?gene=ZNF354A">https://www.genecards.org/cgi-bin/carddisp.pl?gene=ZNF354A</a>     |
| USP50     | Ubiquitin Specific Peptidase 50                                                      | Protein Coding | 32 | GC15M050493 | 3.87335  | <a href="https://www.genecards.org/cgi-bin/carddisp.pl?gene=USP50">https://www.genecards.org/cgi-bin/carddisp.pl?gene=USP50</a>         |
| FRG2C     | FSHD Region Gene 2 Family Member C                                                   | Protein Coding | 24 | GC03P075664 | 3.87335  | <a href="https://www.genecards.org/cgi-bin/carddisp.pl?gene=FRG2C">https://www.genecards.org/cgi-bin/carddisp.pl?gene=FRG2C</a>         |
| IRF2BP2   | Interferon Regulatory Factor 2 Binding Protein 2                                     | Protein Coding | 36 | GC01M234604 | 3.86865  | <a href="https://www.genecards.org/cgi-bin/carddisp.pl?gene=IRF2BP2">https://www.genecards.org/cgi-bin/carddisp.pl?gene=IRF2BP2</a>     |
| AIS2      | Autoimmune Susceptibility 2                                                          | Genetic Locus  | 2  | GC07U901482 | 3.86865  | <a href="https://www.genecards.org/cgi-bin/carddisp.pl?gene=AIS2">https://www.genecards.org/cgi-bin/carddisp.pl?gene=AIS2</a>           |
| AIS3      | Autoimmune Susceptibility 3 (Vitiligo Specific)                                      | Genetic Locus  | 2  | GC08U900492 | 3.86865  | <a href="https://www.genecards.org/cgi-bin/carddisp.pl?gene=AIS3">https://www.genecards.org/cgi-bin/carddisp.pl?gene=AIS3</a>           |



|          |                                          |                |    |             |          |                                                                                                                                       |
|----------|------------------------------------------|----------------|----|-------------|----------|---------------------------------------------------------------------------------------------------------------------------------------|
| ELMO1    | Engulfment And Cell Motility 1           | Protein Coding | 39 | GC07M036860 | 3.834863 | <a href="https://www.genecards.org/cgi-bin/carddisp.pl?gene=ELMO1">https://www.genecards.org/cgi-bin/carddisp.pl?gene=ELMO1</a>       |
| TRPS1    | Transcriptional Repressor GATA Binding 1 | Protein Coding | 45 | GC08M115408 | 3.828751 | <a href="https://www.genecards.org/cgi-bin/carddisp.pl?gene=TRPS1">https://www.genecards.org/cgi-bin/carddisp.pl?gene=TRPS1</a>       |
| SLC22A12 | Solute Carrier Family 22 Member 12       | Protein Coding | 43 | GC11P064609 | 3.827631 | <a href="https://www.genecards.org/cgi-bin/carddisp.pl?gene=SLC22A12">https://www.genecards.org/cgi-bin/carddisp.pl?gene=SLC22A12</a> |
| F5       | Coagulation Factor V                     | Protein Coding | 45 | GC01M169511 | 3.820146 | <a href="https://www.genecards.org/cgi-bin/carddisp.pl?gene=F5">https://www.genecards.org/cgi-bin/carddisp.pl?gene=F5</a>             |
| IFNGR2   | Interferon Gamma Receptor 2              | Protein Coding | 42 | GC21P033402 | 3.816897 | <a href="https://www.genecards.org/cgi-bin/carddisp.pl?gene=IFNGR2">https://www.genecards.org/cgi-bin/carddisp.pl?gene=IFNGR2</a>     |
| AICDA    | Activation Induced Cytidine Deaminase    | Protein Coding | 42 | GC12M008602 | 3.806782 | <a href="https://www.genecards.org/cgi-bin/carddisp.pl?gene=AICDA">https://www.genecards.org/cgi-bin/carddisp.pl?gene=AICDA</a>       |
| TMSB4X   | Thymosin Beta 4 X-Linked                 | Protein Coding | 39 | GC0XP012975 | 3.805577 | <a href="https://www.genecards.org/cgi-bin/carddisp.pl?gene=TMSB4X">https://www.genecards.org/cgi-bin/carddisp.pl?gene=TMSB4X</a>     |
| FRZB     | Frizzled Related Protein                 | Protein Coding | 40 | GC02M182833 | 3.797774 | <a href="https://www.genecards.org/cgi-bin/carddisp.pl?gene=FRZB">https://www.genecards.org/cgi-bin/carddisp.pl?gene=FRZB</a>         |
| CDK2     | Cyclin Dependent Kinase 2                | Protein Coding | 49 | GC12P055966 | 3.792599 | <a href="https://www.genecards.org/cgi-bin/carddisp.pl?gene=CDK2">https://www.genecards.org/cgi-bin/carddisp.pl?gene=CDK2</a>         |
| MAPK10   | Mitogen-Activated Protein Kinase 10      | Protein Coding | 48 | GC04M085990 | 3.789578 | <a href="https://www.genecards.org/cgi-bin/carddisp.pl?gene=MAPK10">https://www.genecards.org/cgi-bin/carddisp.pl?gene=MAPK10</a>     |
| EP300    | E1A Binding Protein P300                 | Protein Coding | 49 | GC22P041091 | 3.78847  | <a href="https://www.genecards.org/cgi-bin/carddisp.pl?gene=EP300">https://www.genecards.org/cgi-bin/carddisp.pl?gene=EP300</a>       |
| BACH2    | BTB Domain And CNC Homolog 2             | Protein Coding | 42 | GC06M089926 | 3.787713 | <a href="https://www.genecards.org/cgi-bin/carddisp.pl?gene=BACH2">https://www.genecards.org/cgi-bin/carddisp.pl?gene=BACH2</a>       |
| LGALS3BP | Galectin 3 Binding Protein               | Protein Coding | 41 | GC17M078971 | 3.787081 | <a href="https://www.genecards.org/cgi-bin/carddisp.pl?gene=LGALS3BP">https://www.genecards.org/cgi-bin/carddisp.pl?gene=LGALS3BP</a> |
| MIR17    | MicroRNA 17                              | RNA Gene       | 20 | GC13P091350 | 3.77556  | <a href="https://www.genecards.org/cgi-">https://www.genecards.org/cgi-</a>                                                           |

|          |                                                    |                |    |             |          |                                                                                                                                              |
|----------|----------------------------------------------------|----------------|----|-------------|----------|----------------------------------------------------------------------------------------------------------------------------------------------|
|          |                                                    |                |    |             |          | <a href="http://www.ncbi.nlm.nih.gov/ncbi/cdd/bin/carddisp.pl?gene=MIR17">bin/carddisp.pl?gene=MIR17</a>                                     |
| BMP7     | Bone Morphogenetic Protein 7                       | Protein Coding | 44 | GC20M057168 | 3.773507 | <a href="http://www.ncbi.nlm.nih.gov/ncbi/cdd/bin/carddisp.pl?gene=BMP7">https://www.genecards.org/cgi-bin/carddisp.pl?gene=BMP7</a>         |
| ARL15    | ADP Ribosylation Factor Like GTPase 15             | Protein Coding | 34 | GC05M053883 | 3.772785 | <a href="http://www.ncbi.nlm.nih.gov/ncbi/cdd/bin/carddisp.pl?gene=ARL15">https://www.genecards.org/cgi-bin/carddisp.pl?gene=ARL15</a>       |
| GAST     | Gastrin                                            | Protein Coding | 38 | GC17P041712 | 3.769227 | <a href="http://www.ncbi.nlm.nih.gov/ncbi/cdd/bin/carddisp.pl?gene=GAST">https://www.genecards.org/cgi-bin/carddisp.pl?gene=GAST</a>         |
| CD276    | CD276 Molecule                                     | Protein Coding | 40 | GC15P073683 | 3.767734 | <a href="http://www.ncbi.nlm.nih.gov/ncbi/cdd/bin/carddisp.pl?gene=CD276">https://www.genecards.org/cgi-bin/carddisp.pl?gene=CD276</a>       |
| ADORA2A  | Adenosine A2a Receptor                             | Protein Coding | 44 | GC22P024417 | 3.764112 | <a href="http://www.ncbi.nlm.nih.gov/ncbi/cdd/bin/carddisp.pl?gene=ADORA2A">https://www.genecards.org/cgi-bin/carddisp.pl?gene=ADORA2A</a>   |
| MAP3K14  | Mitogen-Activated Protein Kinase Kinase Kinase 14  | Protein Coding | 42 | GC17M045263 | 3.763119 | <a href="http://www.ncbi.nlm.nih.gov/ncbi/cdd/bin/carddisp.pl?gene=MAP3K14">https://www.genecards.org/cgi-bin/carddisp.pl?gene=MAP3K14</a>   |
| PSORS1C1 | Psoriasis Susceptibility 1 Candidate 1             | Protein Coding | 30 | GC06P031114 | 3.762619 | <a href="http://www.ncbi.nlm.nih.gov/ncbi/cdd/bin/carddisp.pl?gene=PSORS1C1">https://www.genecards.org/cgi-bin/carddisp.pl?gene=PSORS1C1</a> |
| CTSL     | Cathepsin L                                        | Protein Coding | 45 | GC09P087725 | 3.761764 | <a href="http://www.ncbi.nlm.nih.gov/ncbi/cdd/bin/carddisp.pl?gene=CTSL">https://www.genecards.org/cgi-bin/carddisp.pl?gene=CTSL</a>         |
| PTH1H    | Parathyroid Hormone Like Hormone                   | Protein Coding | 45 | GC12M027959 | 3.761654 | <a href="http://www.ncbi.nlm.nih.gov/ncbi/cdd/bin/carddisp.pl?gene=PTH1H">https://www.genecards.org/cgi-bin/carddisp.pl?gene=PTH1H</a>       |
| CXCL2    | C-X-C Motif Chemokine Ligand 2                     | Protein Coding | 38 | GC04M074097 | 3.75755  | <a href="http://www.ncbi.nlm.nih.gov/ncbi/cdd/bin/carddisp.pl?gene=CXCL2">https://www.genecards.org/cgi-bin/carddisp.pl?gene=CXCL2</a>       |
| ARID5B   | AT-Rich Interaction Domain 5B                      | Protein Coding | 40 | GC10P061901 | 3.745826 | <a href="http://www.ncbi.nlm.nih.gov/ncbi/cdd/bin/carddisp.pl?gene=ARID5B">https://www.genecards.org/cgi-bin/carddisp.pl?gene=ARID5B</a>     |
| TNPO3    | Transportin 3                                      | Protein Coding | 40 | GC07M128954 | 3.745826 | <a href="http://www.ncbi.nlm.nih.gov/ncbi/cdd/bin/carddisp.pl?gene=TNPO3">https://www.genecards.org/cgi-bin/carddisp.pl?gene=TNPO3</a>       |
| SSB      | Small RNA Binding Exonuclease Protection Factor La | Protein Coding | 41 | GC02P169791 | 3.73923  | <a href="http://www.ncbi.nlm.nih.gov/ncbi/cdd/bin/carddisp.pl?gene=SSB">https://www.genecards.org/cgi-bin/carddisp.pl?gene=SSB</a>           |

|           |                                              |                |    |             |          |                                                                                                                                         |
|-----------|----------------------------------------------|----------------|----|-------------|----------|-----------------------------------------------------------------------------------------------------------------------------------------|
| MCL1      | MCL1 Apoptosis Regulator, BCL2 Family Member | Protein Coding | 45 | GC01M152066 | 3.725513 | <a href="https://www.genecards.org/cgi-bin/carddisp.pl?gene=MCL1">https://www.genecards.org/cgi-bin/carddisp.pl?gene=MCL1</a>           |
| VAV1      | Vav Guanine Nucleotide Exchange Factor 1     | Protein Coding | 44 | GC19P006772 | 3.723102 | <a href="https://www.genecards.org/cgi-bin/carddisp.pl?gene=VAV1">https://www.genecards.org/cgi-bin/carddisp.pl?gene=VAV1</a>           |
| PLD4      | Phospholipase D Family Member 4              | Protein Coding | 38 | GC14P104924 | 3.722507 | <a href="https://www.genecards.org/cgi-bin/carddisp.pl?gene=PLD4">https://www.genecards.org/cgi-bin/carddisp.pl?gene=PLD4</a>           |
| HDAC1     | Histone Deacetylase 1                        | Protein Coding | 47 | GC01P032292 | 3.696424 | <a href="https://www.genecards.org/cgi-bin/carddisp.pl?gene=HDAC1">https://www.genecards.org/cgi-bin/carddisp.pl?gene=HDAC1</a>         |
| KLRD1     | Killer Cell Lectin Like Receptor D1          | Protein Coding | 41 | GC12P010226 | 3.693325 | <a href="https://www.genecards.org/cgi-bin/carddisp.pl?gene=KLRD1">https://www.genecards.org/cgi-bin/carddisp.pl?gene=KLRD1</a>         |
| FCN3      | Ficolin 3                                    | Protein Coding | 44 | GC01M027843 | 3.692076 | <a href="https://www.genecards.org/cgi-bin/carddisp.pl?gene=FCN3">https://www.genecards.org/cgi-bin/carddisp.pl?gene=FCN3</a>           |
| MIR221    | MicroRNA 221                                 | RNA Gene       | 21 | GC0XM045746 | 3.690581 | <a href="https://www.genecards.org/cgi-bin/carddisp.pl?gene=MIR221">https://www.genecards.org/cgi-bin/carddisp.pl?gene=MIR221</a>       |
| GSR       | Glutathione-Disulfide Reductase              | Protein Coding | 48 | GC08M030678 | 3.690055 | <a href="https://www.genecards.org/cgi-bin/carddisp.pl?gene=GSR">https://www.genecards.org/cgi-bin/carddisp.pl?gene=GSR</a>             |
| KLF12     | Kruppel Like Factor 12                       | Protein Coding | 37 | GC13M073686 | 3.678336 | <a href="https://www.genecards.org/cgi-bin/carddisp.pl?gene=KLF12">https://www.genecards.org/cgi-bin/carddisp.pl?gene=KLF12</a>         |
| AIM2      | Absent In Melanoma 2                         | Protein Coding | 40 | GC01M159062 | 3.673544 | <a href="https://www.genecards.org/cgi-bin/carddisp.pl?gene=AIM2">https://www.genecards.org/cgi-bin/carddisp.pl?gene=AIM2</a>           |
| LINC02656 | Long Intergenic Non-Protein Coding RNA 2656  | RNA Gene       | 10 | GC10P006350 | 3.67322  | <a href="https://www.genecards.org/cgi-bin/carddisp.pl?gene=LINC02656">https://www.genecards.org/cgi-bin/carddisp.pl?gene=LINC02656</a> |
| ADM       | Adrenomedullin                               | Protein Coding | 43 | GC11P010304 | 3.673102 | <a href="https://www.genecards.org/cgi-bin/carddisp.pl?gene=ADM">https://www.genecards.org/cgi-bin/carddisp.pl?gene=ADM</a>             |
| HSPG2     | Heparan Sulfate Proteoglycan 2               | Protein Coding | 46 | GC01M021822 | 3.671193 | <a href="https://www.genecards.org/cgi-bin/carddisp.pl?gene=HSPG2">https://www.genecards.org/cgi-bin/carddisp.pl?gene=HSPG2</a>         |
| DNMT1     | DNA Methyltransferase 1                      | Protein Coding | 49 | GC19M010133 | 3.66986  | <a href="https://www.genecards.org/cgi-">https://www.genecards.org/cgi-</a>                                                             |

|          |                                                                                 |                |    |             |          |                                                                                                                                       |
|----------|---------------------------------------------------------------------------------|----------------|----|-------------|----------|---------------------------------------------------------------------------------------------------------------------------------------|
|          |                                                                                 |                |    |             |          | <a href="#">bin/carddisp.pl?gene=DNMT1</a>                                                                                            |
| PPBP     | Pro-Platelet Basic Protein                                                      | Protein Coding | 41 | GC04M073986 | 3.669165 | <a href="https://www.genecards.org/cgi-bin/carddisp.pl?gene=PPBP">https://www.genecards.org/cgi-bin/carddisp.pl?gene=PPBP</a>         |
| EGR1     | Early Growth Response 1                                                         | Protein Coding | 42 | GC05P138465 | 3.668759 | <a href="https://www.genecards.org/cgi-bin/carddisp.pl?gene=EGR1">https://www.genecards.org/cgi-bin/carddisp.pl?gene=EGR1</a>         |
| SAMHD1   | SAM And HD Domain Containing Deoxynucleoside Triphosphate Triphosphohydrolase 1 | Protein Coding | 41 | GC20M036890 | 3.6658   | <a href="https://www.genecards.org/cgi-bin/carddisp.pl?gene=SAMHD1">https://www.genecards.org/cgi-bin/carddisp.pl?gene=SAMHD1</a>     |
| LPA      | Lipoprotein(A)                                                                  | Protein Coding | 40 | GC06M160531 | 3.664589 | <a href="https://www.genecards.org/cgi-bin/carddisp.pl?gene=LPA">https://www.genecards.org/cgi-bin/carddisp.pl?gene=LPA</a>           |
| THPO     | Thrombopoietin                                                                  | Protein Coding | 42 | GC03M184371 | 3.663482 | <a href="https://www.genecards.org/cgi-bin/carddisp.pl?gene=THPO">https://www.genecards.org/cgi-bin/carddisp.pl?gene=THPO</a>         |
| TGIF1    | TGFB Induced Factor Homeobox 1                                                  | Protein Coding | 44 | GC18P003411 | 3.663274 | <a href="https://www.genecards.org/cgi-bin/carddisp.pl?gene=TGIF1">https://www.genecards.org/cgi-bin/carddisp.pl?gene=TGIF1</a>       |
| LGALS1   | Galectin 1                                                                      | Protein Coding | 41 | GC22P037675 | 3.658767 | <a href="https://www.genecards.org/cgi-bin/carddisp.pl?gene=LGALS1">https://www.genecards.org/cgi-bin/carddisp.pl?gene=LGALS1</a>     |
| MAPKAPK2 | MAPK Activated Protein Kinase 2                                                 | Protein Coding | 46 | GC01P206684 | 3.656003 | <a href="https://www.genecards.org/cgi-bin/carddisp.pl?gene=MAPKAPK2">https://www.genecards.org/cgi-bin/carddisp.pl?gene=MAPKAPK2</a> |
| CREB1    | CAMP Responsive Element Binding Protein 1                                       | Protein Coding | 47 | GC02P207529 | 3.655792 | <a href="https://www.genecards.org/cgi-bin/carddisp.pl?gene=CREB1">https://www.genecards.org/cgi-bin/carddisp.pl?gene=CREB1</a>       |
| ERBB3    | Erb-B2 Receptor Tyrosine Kinase 3                                               | Protein Coding | 51 | GC12P057264 | 3.653791 | <a href="https://www.genecards.org/cgi-bin/carddisp.pl?gene=ERBB3">https://www.genecards.org/cgi-bin/carddisp.pl?gene=ERBB3</a>       |
| MIR22    | MicroRNA 22                                                                     | RNA Gene       | 21 | GC17M001713 | 3.651958 | <a href="https://www.genecards.org/cgi-bin/carddisp.pl?gene=MIR22">https://www.genecards.org/cgi-bin/carddisp.pl?gene=MIR22</a>       |
| CDK4     | Cyclin Dependent Kinase 4                                                       | Protein Coding | 50 | GC12M057743 | 3.645252 | <a href="https://www.genecards.org/cgi-bin/carddisp.pl?gene=CDK4">https://www.genecards.org/cgi-bin/carddisp.pl?gene=CDK4</a>         |
| FGFR3    | Fibroblast Growth Factor Receptor 3                                             | Protein Coding | 52 | GC04P001795 | 3.64524  | <a href="https://www.genecards.org/cgi-bin/carddisp.pl?gene=FGFR3">https://www.genecards.org/cgi-bin/carddisp.pl?gene=FGFR3</a>       |



|         |                                                                                      |                |    |             |          |                                                                                                                                            |
|---------|--------------------------------------------------------------------------------------|----------------|----|-------------|----------|--------------------------------------------------------------------------------------------------------------------------------------------|
|         |                                                                                      |                |    |             |          | <a href="http://www.ncbi.nlm.nih.gov/ncbi/cdd/bin/carddisp.pl?gene=FGFR3">bin/carddisp.pl?gene=FGFR3</a>                                   |
| PHTF1   | Putative Homeodomain Transcription Factor 1                                          | Protein Coding | 34 | GC01M113696 | 3.634562 | <a href="http://www.ncbi.nlm.nih.gov/ncbi/cdd/bin/carddisp.pl?gene=PHTF1">https://www.genecards.org/cgi-bin/carddisp.pl?gene=PHTF1</a>     |
| MAP2K4  | Mitogen-Activated Protein Kinase Kinase 4                                            | Protein Coding | 45 | GC17P012020 | 3.628612 | <a href="http://www.ncbi.nlm.nih.gov/ncbi/cdd/bin/carddisp.pl?gene=MAP2K4">https://www.genecards.org/cgi-bin/carddisp.pl?gene=MAP2K4</a>   |
| AHSG    | Alpha 2-HS Glycoprotein                                                              | Protein Coding | 42 | GC03P186629 | 3.618032 | <a href="http://www.ncbi.nlm.nih.gov/ncbi/cdd/bin/carddisp.pl?gene=AHSG">https://www.genecards.org/cgi-bin/carddisp.pl?gene=AHSG</a>       |
| BAX     | BCL2 Associated X, Apoptosis Regulator                                               | Protein Coding | 47 | GC19P048954 | 3.615888 | <a href="http://www.ncbi.nlm.nih.gov/ncbi/cdd/bin/carddisp.pl?gene=BAX">https://www.genecards.org/cgi-bin/carddisp.pl?gene=BAX</a>         |
| UNC13D  | Unc-13 Homolog D                                                                     | Protein Coding | 43 | GC17M075827 | 3.613799 | <a href="http://www.ncbi.nlm.nih.gov/ncbi/cdd/bin/carddisp.pl?gene=UNC13D">https://www.genecards.org/cgi-bin/carddisp.pl?gene=UNC13D</a>   |
| TIE1    | Tyrosine Kinase With Immunoglobulin Like And EGF Like Domains 1                      | Protein Coding | 42 | GC01P043300 | 3.609891 | <a href="http://www.ncbi.nlm.nih.gov/ncbi/cdd/bin/carddisp.pl?gene=TIE1">https://www.genecards.org/cgi-bin/carddisp.pl?gene=TIE1</a>       |
| RIPK2   | Receptor Interacting Serine/Threonine Kinase 2                                       | Protein Coding | 44 | GC08P089804 | 3.609241 | <a href="http://www.ncbi.nlm.nih.gov/ncbi/cdd/bin/carddisp.pl?gene=RIPK2">https://www.genecards.org/cgi-bin/carddisp.pl?gene=RIPK2</a>     |
| IREB2   | Iron Responsive Element Binding Protein 2                                            | Protein Coding | 43 | GC15P078437 | 3.606062 | <a href="http://www.ncbi.nlm.nih.gov/ncbi/cdd/bin/carddisp.pl?gene=IREB2">https://www.genecards.org/cgi-bin/carddisp.pl?gene=IREB2</a>     |
| CHRM3   | Cholinergic Receptor Muscarinic 3                                                    | Protein Coding | 47 | GC01P239386 | 3.602444 | <a href="http://www.ncbi.nlm.nih.gov/ncbi/cdd/bin/carddisp.pl?gene=CHRM3">https://www.genecards.org/cgi-bin/carddisp.pl?gene=CHRM3</a>     |
| ETS2    | ETS Proto-Oncogene 2, Transcription Factor                                           | Protein Coding | 40 | GC21P038805 | 3.601353 | <a href="http://www.ncbi.nlm.nih.gov/ncbi/cdd/bin/carddisp.pl?gene=ETS2">https://www.genecards.org/cgi-bin/carddisp.pl?gene=ETS2</a>       |
| KIR2DL2 | Killer Cell Immunoglobulin Like Receptor, Two Ig Domains And Long Cytoplasmic Tail 2 | Protein Coding | 25 | GC19Mr00108 | 3.60015  | <a href="http://www.ncbi.nlm.nih.gov/ncbi/cdd/bin/carddisp.pl?gene=KIR2DL2">https://www.genecards.org/cgi-bin/carddisp.pl?gene=KIR2DL2</a> |
| SDC3    | Syndecan 3                                                                           | Protein Coding | 41 | GC01M030869 | 3.591435 | <a href="http://www.ncbi.nlm.nih.gov/ncbi/cdd/bin/carddisp.pl?gene=SDC3">https://www.genecards.org/cgi-bin/carddisp.pl?gene=SDC3</a>       |
| SLCO1B1 | Solute Carrier Organic Anion Transporter Family Member 1B1                           | Protein Coding | 46 | GC12P021653 | 3.590797 | <a href="http://www.ncbi.nlm.nih.gov/ncbi/cdd/bin/carddisp.pl?gene=SLCO1B1">https://www.genecards.org/cgi-</a>                             |

|         |                                           |                |    |             |          |                                                                                                                                            |
|---------|-------------------------------------------|----------------|----|-------------|----------|--------------------------------------------------------------------------------------------------------------------------------------------|
|         |                                           |                |    |             |          | <a href="http://www.ncbi.nlm.nih.gov/ncbi/cdd/bin/carddisp.pl?gene=SLCO1B1">bin/carddisp.pl?gene=SLCO1B1</a>                               |
| CHST11  | Carbohydrate Sulfotransferase 11          | Protein Coding | 41 | GC12P104455 | 3.585589 | <a href="http://www.ncbi.nlm.nih.gov/ncbi/cdd/bin/carddisp.pl?gene=CHST11">https://www.genecards.org/cgi-bin/carddisp.pl?gene=CHST11</a>   |
| AHR     | Aryl Hydrocarbon Receptor                 | Protein Coding | 47 | GC07P016916 | 3.584531 | <a href="http://www.ncbi.nlm.nih.gov/ncbi/cdd/bin/carddisp.pl?gene=AHR">https://www.genecards.org/cgi-bin/carddisp.pl?gene=AHR</a>         |
| IL18RAP | Interleukin 18 Receptor Accessory Protein | Protein Coding | 37 | GC02P102418 | 3.584322 | <a href="http://www.ncbi.nlm.nih.gov/ncbi/cdd/bin/carddisp.pl?gene=IL18RAP">https://www.genecards.org/cgi-bin/carddisp.pl?gene=IL18RAP</a> |
| CAMP    | Cathelicidin Antimicrobial Peptide        | Protein Coding | 39 | GC03P048954 | 3.583385 | <a href="http://www.ncbi.nlm.nih.gov/ncbi/cdd/bin/carddisp.pl?gene=CAMP">https://www.genecards.org/cgi-bin/carddisp.pl?gene=CAMP</a>       |
| ANGPTL4 | Angiopoietin Like 4                       | Protein Coding | 43 | GC19P008363 | 3.579341 | <a href="http://www.ncbi.nlm.nih.gov/ncbi/cdd/bin/carddisp.pl?gene=ANGPTL4">https://www.genecards.org/cgi-bin/carddisp.pl?gene=ANGPTL4</a> |
| SLAMF7  | SLAM Family Member 7                      | Protein Coding | 41 | GC01P160740 | 3.577115 | <a href="http://www.ncbi.nlm.nih.gov/ncbi/cdd/bin/carddisp.pl?gene=SLAMF7">https://www.genecards.org/cgi-bin/carddisp.pl?gene=SLAMF7</a>   |
| MIR34A  | MicroRNA 34a                              | RNA Gene       | 23 | GC01M009151 | 3.575555 | <a href="http://www.ncbi.nlm.nih.gov/ncbi/cdd/bin/carddisp.pl?gene=MIR34A">https://www.genecards.org/cgi-bin/carddisp.pl?gene=MIR34A</a>   |
| BMP5    | Bone Morphogenetic Protein 5              | Protein Coding | 41 | GC06M055753 | 3.572934 | <a href="http://www.ncbi.nlm.nih.gov/ncbi/cdd/bin/carddisp.pl?gene=BMP5">https://www.genecards.org/cgi-bin/carddisp.pl?gene=BMP5</a>       |
| MMP11   | Matrix Metalloproteinase 11               | Protein Coding | 44 | GC22P023768 | 3.569426 | <a href="http://www.ncbi.nlm.nih.gov/ncbi/cdd/bin/carddisp.pl?gene=MMP11">https://www.genecards.org/cgi-bin/carddisp.pl?gene=MMP11</a>     |
| VEGFC   | Vascular Endothelial Growth Factor C      | Protein Coding | 45 | GC04M176683 | 3.562657 | <a href="http://www.ncbi.nlm.nih.gov/ncbi/cdd/bin/carddisp.pl?gene=VEGFC">https://www.genecards.org/cgi-bin/carddisp.pl?gene=VEGFC</a>     |
| PPIA    | Peptidylprolyl Isomerase A                | Protein Coding | 45 | GC07P044807 | 3.559993 | <a href="http://www.ncbi.nlm.nih.gov/ncbi/cdd/bin/carddisp.pl?gene=PPIA">https://www.genecards.org/cgi-bin/carddisp.pl?gene=PPIA</a>       |
| TRAF2   | TNF Receptor Associated Factor 2          | Protein Coding | 42 | GC09P136881 | 3.556872 | <a href="http://www.ncbi.nlm.nih.gov/ncbi/cdd/bin/carddisp.pl?gene=TRAF2">https://www.genecards.org/cgi-bin/carddisp.pl?gene=TRAF2</a>     |
| LILRB1  | Leukocyte Immunoglobulin Like Receptor B1 | Protein Coding | 42 | GC19P067376 | 3.553421 | <a href="http://www.ncbi.nlm.nih.gov/ncbi/cdd/bin/carddisp.pl?gene=LILRB1">https://www.genecards.org/cgi-bin/carddisp.pl?gene=LILRB1</a>   |

|        |                                                  |                |    |             |          |                                                                                                                                   |
|--------|--------------------------------------------------|----------------|----|-------------|----------|-----------------------------------------------------------------------------------------------------------------------------------|
| RSBN1  | Round Spermatid Basic Protein 1                  | Protein Coding | 32 | GC01M113761 | 3.551713 | <a href="https://www.genecards.org/cgi-bin/carddisp.pl?gene=RSBN1">https://www.genecards.org/cgi-bin/carddisp.pl?gene=RSBN1</a>   |
| FCGRT  | Fc Gamma Receptor And Transporter                | Protein Coding | 42 | GC19P049506 | 3.550697 | <a href="https://www.genecards.org/cgi-bin/carddisp.pl?gene=FCGRT">https://www.genecards.org/cgi-bin/carddisp.pl?gene=FCGRT</a>   |
| MAP3K7 | Mitogen-Activated Protein Kinase Kinase Kinase 7 | Protein Coding | 48 | GC06M090513 | 3.54487  | <a href="https://www.genecards.org/cgi-bin/carddisp.pl?gene=MAP3K7">https://www.genecards.org/cgi-bin/carddisp.pl?gene=MAP3K7</a> |
| GP1BB  | Glycoprotein Ib Platelet Subunit Beta            | Protein Coding | 42 | GC22P035810 | 3.544345 | <a href="https://www.genecards.org/cgi-bin/carddisp.pl?gene=GP1BB">https://www.genecards.org/cgi-bin/carddisp.pl?gene=GP1BB</a>   |
| KRT5   | Keratin 5                                        | Protein Coding | 45 | GC12M052514 | 3.5425   | <a href="https://www.genecards.org/cgi-bin/carddisp.pl?gene=KRT5">https://www.genecards.org/cgi-bin/carddisp.pl?gene=KRT5</a>     |
| ADAM15 | ADAM Metallopeptidase Domain 15                  | Protein Coding | 42 | GC01P155050 | 3.540148 | <a href="https://www.genecards.org/cgi-bin/carddisp.pl?gene=ADAM15">https://www.genecards.org/cgi-bin/carddisp.pl?gene=ADAM15</a> |
| MAP3K1 | Mitogen-Activated Protein Kinase Kinase Kinase 1 | Protein Coding | 47 | GC05P056815 | 3.538762 | <a href="https://www.genecards.org/cgi-bin/carddisp.pl?gene=MAP3K1">https://www.genecards.org/cgi-bin/carddisp.pl?gene=MAP3K1</a> |
| MIR126 | MicroRNA 126                                     | RNA Gene       | 22 | GC09P136670 | 3.526884 | <a href="https://www.genecards.org/cgi-bin/carddisp.pl?gene=MIR126">https://www.genecards.org/cgi-bin/carddisp.pl?gene=MIR126</a> |
| GUSB   | Glucuronidase Beta                               | Protein Coding | 46 | GC07M065960 | 3.524533 | <a href="https://www.genecards.org/cgi-bin/carddisp.pl?gene=GUSB">https://www.genecards.org/cgi-bin/carddisp.pl?gene=GUSB</a>     |
| CLEC3B | C-Type Lectin Domain Family 3 Member B           | Protein Coding | 39 | GC03P046742 | 3.52183  | <a href="https://www.genecards.org/cgi-bin/carddisp.pl?gene=CLEC3B">https://www.genecards.org/cgi-bin/carddisp.pl?gene=CLEC3B</a> |
| TERT   | Telomerase Reverse Transcriptase                 | Protein Coding | 49 | GC05M001253 | 3.517506 | <a href="https://www.genecards.org/cgi-bin/carddisp.pl?gene=TERT">https://www.genecards.org/cgi-bin/carddisp.pl?gene=TERT</a>     |
| ANXA2  | Annexin A2                                       | Protein Coding | 46 | GC15M060347 | 3.517336 | <a href="https://www.genecards.org/cgi-bin/carddisp.pl?gene=ANXA2">https://www.genecards.org/cgi-bin/carddisp.pl?gene=ANXA2</a>   |
| CCL7   | C-C Motif Chemokine Ligand 7                     | Protein Coding | 41 | GC17P034270 | 3.515968 | <a href="https://www.genecards.org/cgi-bin/carddisp.pl?gene=CCL7">https://www.genecards.org/cgi-bin/carddisp.pl?gene=CCL7</a>     |
| IFNL1  | Interferon Lambda 1                              | Protein Coding | 33 | GC19P039296 | 3.509798 | <a href="https://www.genecards.org/cgi-">https://www.genecards.org/cgi-</a>                                                       |

|           |                                                                                         |                |    |             |          |                                                                                                                                         |
|-----------|-----------------------------------------------------------------------------------------|----------------|----|-------------|----------|-----------------------------------------------------------------------------------------------------------------------------------------|
|           |                                                                                         |                |    |             |          | bin/carddisp.pl?gene=IFNL1                                                                                                              |
| SALL3     | Spalt Like Transcription Factor 3                                                       | Protein Coding | 35 | GC18P078980 | 3.507736 | <a href="https://www.genecards.org/cgi-bin/carddisp.pl?gene=SALL3">https://www.genecards.org/cgi-bin/carddisp.pl?gene=SALL3</a>         |
| CXCR6     | C-X-C Motif Chemokine Receptor 6                                                        | Protein Coding | 38 | GC03P046765 | 3.505186 | <a href="https://www.genecards.org/cgi-bin/carddisp.pl?gene=CXCR6">https://www.genecards.org/cgi-bin/carddisp.pl?gene=CXCR6</a>         |
| MIR30A    | MicroRNA 30a                                                                            | RNA Gene       | 20 | GC06M071403 | 3.503458 | <a href="https://www.genecards.org/cgi-bin/carddisp.pl?gene=MIR30A">https://www.genecards.org/cgi-bin/carddisp.pl?gene=MIR30A</a>       |
| TNFRSF12A | TNF Receptor Superfamily Member 12A                                                     | Protein Coding | 41 | GC16P003018 | 3.499381 | <a href="https://www.genecards.org/cgi-bin/carddisp.pl?gene=TNFRSF12A">https://www.genecards.org/cgi-bin/carddisp.pl?gene=TNFRSF12A</a> |
| AKT2      | AKT Serine/Threonine Kinase 2                                                           | Protein Coding | 51 | GC19M040230 | 3.491042 | <a href="https://www.genecards.org/cgi-bin/carddisp.pl?gene=AKT2">https://www.genecards.org/cgi-bin/carddisp.pl?gene=AKT2</a>           |
| PFKM      | Phosphofructokinase, Muscle                                                             | Protein Coding | 48 | GC12P048105 | 3.490663 | <a href="https://www.genecards.org/cgi-bin/carddisp.pl?gene=PFKM">https://www.genecards.org/cgi-bin/carddisp.pl?gene=PFKM</a>           |
| LERFS     | LncRNA Negative Regulator Of Fibroblast-Like Synoviocyte Migration, SYNCRIP Interacting | RNA Gene       | 9  | GC09M062859 | 3.490208 | <a href="https://www.genecards.org/cgi-bin/carddisp.pl?gene=LERFS">https://www.genecards.org/cgi-bin/carddisp.pl?gene=LERFS</a>         |
| BCL6      | BCL6 Transcription Repressor                                                            | Protein Coding | 43 | GC03M187721 | 3.487766 | <a href="https://www.genecards.org/cgi-bin/carddisp.pl?gene=BCL6">https://www.genecards.org/cgi-bin/carddisp.pl?gene=BCL6</a>           |
| APOB      | Apolipoprotein B                                                                        | Protein Coding | 45 | GC02M020956 | 3.4875   | <a href="https://www.genecards.org/cgi-bin/carddisp.pl?gene=APOB">https://www.genecards.org/cgi-bin/carddisp.pl?gene=APOB</a>           |
| KIR2DL1   | Killer Cell Immunoglobulin Like Receptor, Two Ig Domains And Long Cytoplasmic Tail 1    | Protein Coding | 36 | GC19P067381 | 3.486579 | <a href="https://www.genecards.org/cgi-bin/carddisp.pl?gene=KIR2DL1">https://www.genecards.org/cgi-bin/carddisp.pl?gene=KIR2DL1</a>     |
| CYBC1     | Cytochrome B-245 Chaperone 1                                                            | Protein Coding | 25 | GC17M082443 | 3.481138 | <a href="https://www.genecards.org/cgi-bin/carddisp.pl?gene=CYBC1">https://www.genecards.org/cgi-bin/carddisp.pl?gene=CYBC1</a>         |
| HNRNPC    | Heterogeneous Nuclear Ribonucleoprotein C                                               | Protein Coding | 40 | GC14M022503 | 3.476026 | <a href="https://www.genecards.org/cgi-bin/carddisp.pl?gene=HNRNPC">https://www.genecards.org/cgi-bin/carddisp.pl?gene=HNRNPC</a>       |
| KRT18     | Keratin 18                                                                              | Protein Coding | 46 | GC12P052948 | 3.469151 | <a href="https://www.genecards.org/cgi-bin/carddisp.pl?gene=KRT18">https://www.genecards.org/cgi-bin/carddisp.pl?gene=KRT18</a>         |

|          |                                                        |                |    |             |          |                                                                                                                                              |
|----------|--------------------------------------------------------|----------------|----|-------------|----------|----------------------------------------------------------------------------------------------------------------------------------------------|
|          |                                                        |                |    |             |          | <a href="http://www.ncbi.nlm.nih.gov/ncbi/cdd/bin/carddisp.pl?gene=KRT18">bin/carddisp.pl?gene=KRT18</a>                                     |
| HLA-DPA1 | Major Histocompatibility Complex, Class II, DP Alpha 1 | Protein Coding | 40 | GC06M033064 | 3.46679  | <a href="http://www.ncbi.nlm.nih.gov/ncbi/cdd/bin/carddisp.pl?gene=HLA-DPA1">https://www.genecards.org/cgi-bin/carddisp.pl?gene=HLA-DPA1</a> |
| GOLGB1   | Golgin B1                                              | Protein Coding | 36 | GC03M121663 | 3.465222 | <a href="http://www.ncbi.nlm.nih.gov/ncbi/cdd/bin/carddisp.pl?gene=GOLGB1">https://www.genecards.org/cgi-bin/carddisp.pl?gene=GOLGB1</a>     |
| ITGAX    | Integrin Subunit Alpha X                               | Protein Coding | 44 | GC16P041137 | 3.465128 | <a href="http://www.ncbi.nlm.nih.gov/ncbi/cdd/bin/carddisp.pl?gene=ITGAX">https://www.genecards.org/cgi-bin/carddisp.pl?gene=ITGAX</a>       |
| ICAM2    | Intercellular Adhesion Molecule 2                      | Protein Coding | 42 | GC17M064002 | 3.453012 | <a href="http://www.ncbi.nlm.nih.gov/ncbi/cdd/bin/carddisp.pl?gene=ICAM2">https://www.genecards.org/cgi-bin/carddisp.pl?gene=ICAM2</a>       |
| LGALS8   | Galectin 8                                             | Protein Coding | 40 | GC01P236518 | 3.446825 | <a href="http://www.ncbi.nlm.nih.gov/ncbi/cdd/bin/carddisp.pl?gene=LGALS8">https://www.genecards.org/cgi-bin/carddisp.pl?gene=LGALS8</a>     |
| IFNG-AS1 | IFNG Antisense RNA 1                                   | RNA Gene       | 18 | GC12P067989 | 3.44533  | <a href="http://www.ncbi.nlm.nih.gov/ncbi/cdd/bin/carddisp.pl?gene=IFNG-AS1">https://www.genecards.org/cgi-bin/carddisp.pl?gene=IFNG-AS1</a> |
| MSN      | Moesin                                                 | Protein Coding | 45 | GC0XP065588 | 3.428742 | <a href="http://www.ncbi.nlm.nih.gov/ncbi/cdd/bin/carddisp.pl?gene=MSN">https://www.genecards.org/cgi-bin/carddisp.pl?gene=MSN</a>           |
| GHSR     | Growth Hormone Secretagogue Receptor                   | Protein Coding | 45 | GC03M172443 | 3.424213 | <a href="http://www.ncbi.nlm.nih.gov/ncbi/cdd/bin/carddisp.pl?gene=GHSR">https://www.genecards.org/cgi-bin/carddisp.pl?gene=GHSR</a>         |
| MAP2K6   | Mitogen-Activated Protein Kinase Kinase 6              | Protein Coding | 44 | GC17P069414 | 3.418328 | <a href="http://www.ncbi.nlm.nih.gov/ncbi/cdd/bin/carddisp.pl?gene=MAP2K6">https://www.genecards.org/cgi-bin/carddisp.pl?gene=MAP2K6</a>     |
| RAC1     | Rac Family Small GTPase 1                              | Protein Coding | 47 | GC07P006377 | 3.405939 | <a href="http://www.ncbi.nlm.nih.gov/ncbi/cdd/bin/carddisp.pl?gene=RAC1">https://www.genecards.org/cgi-bin/carddisp.pl?gene=RAC1</a>         |
| SHMT1    | Serine Hydroxymethyltransferase 1                      | Protein Coding | 44 | GC17M025713 | 3.405916 | <a href="http://www.ncbi.nlm.nih.gov/ncbi/cdd/bin/carddisp.pl?gene=SHMT1">https://www.genecards.org/cgi-bin/carddisp.pl?gene=SHMT1</a>       |
| XRCC1    | X-Ray Repair Cross Complementing 1                     | Protein Coding | 43 | GC19M043543 | 3.405916 | <a href="http://www.ncbi.nlm.nih.gov/ncbi/cdd/bin/carddisp.pl?gene=XRCC1">https://www.genecards.org/cgi-bin/carddisp.pl?gene=XRCC1</a>       |
| MSH5     | MutS Homolog 5                                         | Protein Coding | 40 | GC06P083709 | 3.405401 | <a href="http://www.ncbi.nlm.nih.gov/ncbi/cdd/bin/carddisp.pl?gene=MSH5">https://www.genecards.org/cgi-bin/carddisp.pl?gene=MSH5</a>         |

|        |                                                                            |                |    |             |          |                                                                                                                                   |
|--------|----------------------------------------------------------------------------|----------------|----|-------------|----------|-----------------------------------------------------------------------------------------------------------------------------------|
| YWHAH  | Tyrosine 3-Monooxygenase/Tryptophan 5-Monooxygenase Activation Protein Eta | Protein Coding | 45 | GC22P031944 | 3.397234 | <a href="https://www.genecards.org/cgi-bin/carddisp.pl?gene=YWHAH">https://www.genecards.org/cgi-bin/carddisp.pl?gene=YWHAH</a>   |
| ENO2   | Enolase 2                                                                  | Protein Coding | 45 | GC12P006913 | 3.397164 | <a href="https://www.genecards.org/cgi-bin/carddisp.pl?gene=ENO2">https://www.genecards.org/cgi-bin/carddisp.pl?gene=ENO2</a>     |
| ITLN1  | Intelectin 1                                                               | Protein Coding | 38 | GC01M160876 | 3.395515 | <a href="https://www.genecards.org/cgi-bin/carddisp.pl?gene=ITLN1">https://www.genecards.org/cgi-bin/carddisp.pl?gene=ITLN1</a>   |
| TLR6   | Toll Like Receptor 6                                                       | Protein Coding | 42 | GC04M038828 | 3.38742  | <a href="https://www.genecards.org/cgi-bin/carddisp.pl?gene=TLR6">https://www.genecards.org/cgi-bin/carddisp.pl?gene=TLR6</a>     |
| LAG3   | Lymphocyte Activating 3                                                    | Protein Coding | 38 | GC12P021074 | 3.384944 | <a href="https://www.genecards.org/cgi-bin/carddisp.pl?gene=LAG3">https://www.genecards.org/cgi-bin/carddisp.pl?gene=LAG3</a>     |
| HDAC4  | Histone Deacetylase 4                                                      | Protein Coding | 49 | GC02M239048 | 3.382961 | <a href="https://www.genecards.org/cgi-bin/carddisp.pl?gene=HDAC4">https://www.genecards.org/cgi-bin/carddisp.pl?gene=HDAC4</a>   |
| CARD9  | Caspase Recruitment Domain Family Member 9                                 | Protein Coding | 42 | GC09M136364 | 3.378241 | <a href="https://www.genecards.org/cgi-bin/carddisp.pl?gene=CARD9">https://www.genecards.org/cgi-bin/carddisp.pl?gene=CARD9</a>   |
| CEBPB  | CCAAT Enhancer Binding Protein Beta                                        | Protein Coding | 42 | GC20P050190 | 3.374365 | <a href="https://www.genecards.org/cgi-bin/carddisp.pl?gene=CEBPB">https://www.genecards.org/cgi-bin/carddisp.pl?gene=CEBPB</a>   |
| GPX3   | Glutathione Peroxidase 3                                                   | Protein Coding | 41 | GC05P150997 | 3.369219 | <a href="https://www.genecards.org/cgi-bin/carddisp.pl?gene=GPX3">https://www.genecards.org/cgi-bin/carddisp.pl?gene=GPX3</a>     |
| CYP1A1 | Cytochrome P450 Family 1 Subfamily A Member 1                              | Protein Coding | 46 | GC15M074719 | 3.366565 | <a href="https://www.genecards.org/cgi-bin/carddisp.pl?gene=CYP1A1">https://www.genecards.org/cgi-bin/carddisp.pl?gene=CYP1A1</a> |
| FPR2   | Formyl Peptide Receptor 2                                                  | Protein Coding | 44 | GC19P051752 | 3.365879 | <a href="https://www.genecards.org/cgi-bin/carddisp.pl?gene=FPR2">https://www.genecards.org/cgi-bin/carddisp.pl?gene=FPR2</a>     |
| TAC3   | Tachykinin Precursor 3                                                     | Protein Coding | 43 | GC12M057009 | 3.365708 | <a href="https://www.genecards.org/cgi-bin/carddisp.pl?gene=TAC3">https://www.genecards.org/cgi-bin/carddisp.pl?gene=TAC3</a>     |
| PLCL2  | Phospholipase C Like 2                                                     | Protein Coding | 37 | GC03P017121 | 3.365654 | <a href="https://www.genecards.org/cgi-bin/carddisp.pl?gene=PLCL2">https://www.genecards.org/cgi-bin/carddisp.pl?gene=PLCL2</a>   |
| A2M    | Alpha-2-Macroglobulin                                                      | Protein Coding | 43 | GC12M009067 | 3.359872 | <a href="https://www.genecards.org/cgi-bin/carddisp.pl?gene=A2M">https://www.genecards.org/cgi-bin/carddisp.pl?gene=A2M</a>       |

|         |                                                |                |    |             |          |                                                                                                                                            |
|---------|------------------------------------------------|----------------|----|-------------|----------|--------------------------------------------------------------------------------------------------------------------------------------------|
|         |                                                |                |    |             |          | <a href="http://www.ncbi.nlm.nih.gov/ncbi/cdd/bin/carddisp.pl?gene=A2M">bin/carddisp.pl?gene=A2M</a>                                       |
| VTN     | Vitronectin                                    | Protein Coding | 42 | GC17M035135 | 3.35919  | <a href="http://www.ncbi.nlm.nih.gov/ncbi/cdd/bin/carddisp.pl?gene=VTN">https://www.genecards.org/cgi-bin/carddisp.pl?gene=VTN</a>         |
| SLAMF6  | SLAM Family Member 6                           | Protein Coding | 39 | GC01M160454 | 3.356922 | <a href="http://www.ncbi.nlm.nih.gov/ncbi/cdd/bin/carddisp.pl?gene=SLAMF6">https://www.genecards.org/cgi-bin/carddisp.pl?gene=SLAMF6</a>   |
| MIR16-1 | MicroRNA 16-1                                  | RNA Gene       | 21 | GC13M050048 | 3.355897 | <a href="http://www.ncbi.nlm.nih.gov/ncbi/cdd/bin/carddisp.pl?gene=MIR16-1">https://www.genecards.org/cgi-bin/carddisp.pl?gene=MIR16-1</a> |
| IRAK3   | Interleukin 1 Receptor Associated Kinase 3     | Protein Coding | 45 | GC12P066278 | 3.355262 | <a href="http://www.ncbi.nlm.nih.gov/ncbi/cdd/bin/carddisp.pl?gene=IRAK3">https://www.genecards.org/cgi-bin/carddisp.pl?gene=IRAK3</a>     |
| IKZF3   | IKAROS Family Zinc Finger 3                    | Protein Coding | 41 | GC17M042354 | 3.352949 | <a href="http://www.ncbi.nlm.nih.gov/ncbi/cdd/bin/carddisp.pl?gene=IKZF3">https://www.genecards.org/cgi-bin/carddisp.pl?gene=IKZF3</a>     |
| RNASE3  | Ribonuclease A Family Member 3                 | Protein Coding | 40 | GC14P020891 | 3.351332 | <a href="http://www.ncbi.nlm.nih.gov/ncbi/cdd/bin/carddisp.pl?gene=RNASE3">https://www.genecards.org/cgi-bin/carddisp.pl?gene=RNASE3</a>   |
| MTNR1B  | Melatonin Receptor 1B                          | Protein Coding | 44 | GC11P092969 | 3.349228 | <a href="http://www.ncbi.nlm.nih.gov/ncbi/cdd/bin/carddisp.pl?gene=MTNR1B">https://www.genecards.org/cgi-bin/carddisp.pl?gene=MTNR1B</a>   |
| CYP17A1 | Cytochrome P450 Family 17 Subfamily A Member 1 | Protein Coding | 47 | GC10M102830 | 3.347181 | <a href="http://www.ncbi.nlm.nih.gov/ncbi/cdd/bin/carddisp.pl?gene=CYP17A1">https://www.genecards.org/cgi-bin/carddisp.pl?gene=CYP17A1</a> |
| ANXA3   | Annexin A3                                     | Protein Coding | 41 | GC04P078551 | 3.345737 | <a href="http://www.ncbi.nlm.nih.gov/ncbi/cdd/bin/carddisp.pl?gene=ANXA3">https://www.genecards.org/cgi-bin/carddisp.pl?gene=ANXA3</a>     |
| FAM107A | Family With Sequence Similarity 107 Member A   | Protein Coding | 36 | GC03M058741 | 3.345737 | <a href="http://www.ncbi.nlm.nih.gov/ncbi/cdd/bin/carddisp.pl?gene=FAM107A">https://www.genecards.org/cgi-bin/carddisp.pl?gene=FAM107A</a> |
| CYP2D6  | Cytochrome P450 Family 2 Subfamily D Member 6  | Protein Coding | 46 | GC22M042126 | 3.341916 | <a href="http://www.ncbi.nlm.nih.gov/ncbi/cdd/bin/carddisp.pl?gene=CYP2D6">https://www.genecards.org/cgi-bin/carddisp.pl?gene=CYP2D6</a>   |
| CCL8    | C-C Motif Chemokine Ligand 8                   | Protein Coding | 37 | GC17P034319 | 3.340772 | <a href="http://www.ncbi.nlm.nih.gov/ncbi/cdd/bin/carddisp.pl?gene=CCL8">https://www.genecards.org/cgi-bin/carddisp.pl?gene=CCL8</a>       |
| ITGA5   | Integrin Subunit Alpha 5                       | Protein Coding | 47 | GC12M054899 | 3.33706  | <a href="http://www.ncbi.nlm.nih.gov/ncbi/cdd/bin/carddisp.pl?gene=ITGA5">https://www.genecards.org/cgi-bin/carddisp.pl?gene=ITGA5</a>     |

|          |                                               |                |    |             |          |                                                                                                                                       |
|----------|-----------------------------------------------|----------------|----|-------------|----------|---------------------------------------------------------------------------------------------------------------------------------------|
| RPL7     | Ribosomal Protein L7                          | Protein Coding | 41 | GC08M073290 | 3.335141 | <a href="https://www.genecards.org/cgi-bin/carddisp.pl?gene=RPL7">https://www.genecards.org/cgi-bin/carddisp.pl?gene=RPL7</a>         |
| SUOX     | Sulfite Oxidase                               | Protein Coding | 44 | GC12P055997 | 3.330769 | <a href="https://www.genecards.org/cgi-bin/carddisp.pl?gene=SUOX">https://www.genecards.org/cgi-bin/carddisp.pl?gene=SUOX</a>         |
| TXNDC5   | Thioredoxin Domain Containing 5               | Protein Coding | 37 | GC06M007893 | 3.32913  | <a href="https://www.genecards.org/cgi-bin/carddisp.pl?gene=TXNDC5">https://www.genecards.org/cgi-bin/carddisp.pl?gene=TXNDC5</a>     |
| CYP3A4   | Cytochrome P450 Family 3 Subfamily A Member 4 | Protein Coding | 49 | GC07M099759 | 3.326074 | <a href="https://www.genecards.org/cgi-bin/carddisp.pl?gene=CYP3A4">https://www.genecards.org/cgi-bin/carddisp.pl?gene=CYP3A4</a>     |
| MB       | Myoglobin                                     | Protein Coding | 42 | GC22M035606 | 3.325997 | <a href="https://www.genecards.org/cgi-bin/carddisp.pl?gene=MB">https://www.genecards.org/cgi-bin/carddisp.pl?gene=MB</a>             |
| PROCR    | Protein C Receptor                            | Protein Coding | 41 | GC20P035171 | 3.325412 | <a href="https://www.genecards.org/cgi-bin/carddisp.pl?gene=PROCR">https://www.genecards.org/cgi-bin/carddisp.pl?gene=PROCR</a>       |
| TSPO     | Translocator Protein                          | Protein Coding | 43 | GC22P043151 | 3.324191 | <a href="https://www.genecards.org/cgi-bin/carddisp.pl?gene=TSPO">https://www.genecards.org/cgi-bin/carddisp.pl?gene=TSPO</a>         |
| MIR145   | MicroRNA 145                                  | RNA Gene       | 22 | GC05P149430 | 3.322383 | <a href="https://www.genecards.org/cgi-bin/carddisp.pl?gene=MIR145">https://www.genecards.org/cgi-bin/carddisp.pl?gene=MIR145</a>     |
| COL5A1   | Collagen Type V Alpha 1 Chain                 | Protein Coding | 45 | GC09P134641 | 3.315518 | <a href="https://www.genecards.org/cgi-bin/carddisp.pl?gene=COL5A1">https://www.genecards.org/cgi-bin/carddisp.pl?gene=COL5A1</a>     |
| LCN2     | Lipocalin 2                                   | Protein Coding | 43 | GC09P128149 | 3.315227 | <a href="https://www.genecards.org/cgi-bin/carddisp.pl?gene=LCN2">https://www.genecards.org/cgi-bin/carddisp.pl?gene=LCN2</a>         |
| GLA      | Galactosidase Alpha                           | Protein Coding | 47 | GC0XM101393 | 3.312398 | <a href="https://www.genecards.org/cgi-bin/carddisp.pl?gene=GLA">https://www.genecards.org/cgi-bin/carddisp.pl?gene=GLA</a>           |
| TNFRSF18 | TNF Receptor Superfamily Member 18            | Protein Coding | 40 | GC01M001203 | 3.311267 | <a href="https://www.genecards.org/cgi-bin/carddisp.pl?gene=TNFRSF18">https://www.genecards.org/cgi-bin/carddisp.pl?gene=TNFRSF18</a> |
| WNT1     | Wnt Family Member 1                           | Protein Coding | 44 | GC12P049348 | 3.305258 | <a href="https://www.genecards.org/cgi-bin/carddisp.pl?gene=WNT1">https://www.genecards.org/cgi-bin/carddisp.pl?gene=WNT1</a>         |
| PADI6    | Peptidyl Arginine Deiminase 6                 | Protein Coding | 37 | GC01P017851 | 3.304638 | <a href="https://www.genecards.org/cgi-bin/carddisp.pl?gene=PADI6">https://www.genecards.org/cgi-bin/carddisp.pl?gene=PADI6</a>       |



|         |                                                          |                |    |             |          |                                                                                                                                     |
|---------|----------------------------------------------------------|----------------|----|-------------|----------|-------------------------------------------------------------------------------------------------------------------------------------|
|         |                                                          |                |    |             |          | <a href="#">bin/carddisp.pl?gene=PADI6</a>                                                                                          |
| SULT1A3 | Sulfotransferase Family 1A Member 3                      | Protein Coding | 37 | GC16P030199 | 3.301711 | <a href="https://www.genecards.org/cgi-bin/carddisp.pl?gene=SULT1A3">https://www.genecards.org/cgi-bin/carddisp.pl?gene=SULT1A3</a> |
| PDE2A   | Phosphodiesterase 2A                                     | Protein Coding | 46 | GC11M072576 | 3.296451 | <a href="https://www.genecards.org/cgi-bin/carddisp.pl?gene=PDE2A">https://www.genecards.org/cgi-bin/carddisp.pl?gene=PDE2A</a>     |
| PRKCB   | Protein Kinase C Beta                                    | Protein Coding | 45 | GC16P024288 | 3.296451 | <a href="https://www.genecards.org/cgi-bin/carddisp.pl?gene=PRKCB">https://www.genecards.org/cgi-bin/carddisp.pl?gene=PRKCB</a>     |
| ZNF774  | Zinc Finger Protein 774                                  | Protein Coding | 28 | GC15P090352 | 3.296451 | <a href="https://www.genecards.org/cgi-bin/carddisp.pl?gene=ZNF774">https://www.genecards.org/cgi-bin/carddisp.pl?gene=ZNF774</a>   |
| MPIG6B  | Megakaryocyte And Platelet Inhibitory Receptor G6b       | Protein Coding | 30 | GC06P085586 | 3.293161 | <a href="https://www.genecards.org/cgi-bin/carddisp.pl?gene=MPIG6B">https://www.genecards.org/cgi-bin/carddisp.pl?gene=MPIG6B</a>   |
| ELAVL1  | ELAV Like RNA Binding Protein 1                          | Protein Coding | 40 | GC19M007958 | 3.292305 | <a href="https://www.genecards.org/cgi-bin/carddisp.pl?gene=ELAVL1">https://www.genecards.org/cgi-bin/carddisp.pl?gene=ELAVL1</a>   |
| FADS1   | Fatty Acid Desaturase 1                                  | Protein Coding | 43 | GC11M061799 | 3.286213 | <a href="https://www.genecards.org/cgi-bin/carddisp.pl?gene=FADS1">https://www.genecards.org/cgi-bin/carddisp.pl?gene=FADS1</a>     |
| LEPR    | Leptin Receptor                                          | Protein Coding | 48 | GC01P065421 | 3.283623 | <a href="https://www.genecards.org/cgi-bin/carddisp.pl?gene=LEPR">https://www.genecards.org/cgi-bin/carddisp.pl?gene=LEPR</a>       |
| CALCRL  | Calcitonin Receptor Like Receptor                        | Protein Coding | 44 | GC02M187341 | 3.278847 | <a href="https://www.genecards.org/cgi-bin/carddisp.pl?gene=CALCRL">https://www.genecards.org/cgi-bin/carddisp.pl?gene=CALCRL</a>   |
| TXN     | Thioredoxin                                              | Protein Coding | 44 | GC09M110243 | 3.277952 | <a href="https://www.genecards.org/cgi-bin/carddisp.pl?gene=TXN">https://www.genecards.org/cgi-bin/carddisp.pl?gene=TXN</a>         |
| CD59    | CD59 Molecule (CD59 Blood Group)                         | Protein Coding | 44 | GC11M033704 | 3.277409 | <a href="https://www.genecards.org/cgi-bin/carddisp.pl?gene=CD59">https://www.genecards.org/cgi-bin/carddisp.pl?gene=CD59</a>       |
| HAS2    | Hyaluronan Synthase 2                                    | Protein Coding | 40 | GC08M121594 | 3.272159 | <a href="https://www.genecards.org/cgi-bin/carddisp.pl?gene=HAS2">https://www.genecards.org/cgi-bin/carddisp.pl?gene=HAS2</a>       |
| ADAMTS7 | ADAM Metallopeptidase With Thrombospondin Type 1 Motif 7 | Protein Coding | 40 | GC15M078759 | 3.27092  | <a href="https://www.genecards.org/cgi-bin/carddisp.pl?gene=ADAMTS7">https://www.genecards.org/cgi-bin/carddisp.pl?gene=ADAMTS7</a> |

|           |                                                            |                |    |             |          |                                                                                                                                         |
|-----------|------------------------------------------------------------|----------------|----|-------------|----------|-----------------------------------------------------------------------------------------------------------------------------------------|
| FCN1      | Ficolin 1                                                  | Protein Coding | 40 | GC09M135133 | 3.267613 | <a href="https://www.genecards.org/cgi-bin/carddisp.pl?gene=FCN1">https://www.genecards.org/cgi-bin/carddisp.pl?gene=FCN1</a>           |
| SHBG      | Sex Hormone Binding Globulin                               | Protein Coding | 40 | GC17P007613 | 3.265517 | <a href="https://www.genecards.org/cgi-bin/carddisp.pl?gene=SHBG">https://www.genecards.org/cgi-bin/carddisp.pl?gene=SHBG</a>           |
| IL1F10    | Interleukin 1 Family Member 10                             | Protein Coding | 37 | GC02P113067 | 3.26474  | <a href="https://www.genecards.org/cgi-bin/carddisp.pl?gene=IL1F10">https://www.genecards.org/cgi-bin/carddisp.pl?gene=IL1F10</a>       |
| TGFA      | Transforming Growth Factor Alpha                           | Protein Coding | 44 | GC02M070447 | 3.262326 | <a href="https://www.genecards.org/cgi-bin/carddisp.pl?gene=TGFA">https://www.genecards.org/cgi-bin/carddisp.pl?gene=TGFA</a>           |
| TNFRSF10B | TNF Receptor Superfamily Member 10b                        | Protein Coding | 48 | GC08M023020 | 3.261706 | <a href="https://www.genecards.org/cgi-bin/carddisp.pl?gene=TNFRSF10B">https://www.genecards.org/cgi-bin/carddisp.pl?gene=TNFRSF10B</a> |
| VTCN1     | V-Set Domain Containing T Cell Activation Inhibitor 1      | Protein Coding | 39 | GC01M117143 | 3.25684  | <a href="https://www.genecards.org/cgi-bin/carddisp.pl?gene=VTCN1">https://www.genecards.org/cgi-bin/carddisp.pl?gene=VTCN1</a>         |
| IAPP      | Islet Amyloid Polypeptide                                  | Protein Coding | 41 | GC12P021354 | 3.253519 | <a href="https://www.genecards.org/cgi-bin/carddisp.pl?gene=IAPP">https://www.genecards.org/cgi-bin/carddisp.pl?gene=IAPP</a>           |
| GPSM3     | G Protein Signaling Modulator 3                            | Protein Coding | 33 | GC06M065987 | 3.252458 | <a href="https://www.genecards.org/cgi-bin/carddisp.pl?gene=GPSM3">https://www.genecards.org/cgi-bin/carddisp.pl?gene=GPSM3</a>         |
| GRN       | Granulin Precursor                                         | Protein Coding | 46 | GC17P044345 | 3.248304 | <a href="https://www.genecards.org/cgi-bin/carddisp.pl?gene=GRN">https://www.genecards.org/cgi-bin/carddisp.pl?gene=GRN</a>             |
| CASP7     | Caspase 7                                                  | Protein Coding | 47 | GC10P113679 | 3.247452 | <a href="https://www.genecards.org/cgi-bin/carddisp.pl?gene=CASP7">https://www.genecards.org/cgi-bin/carddisp.pl?gene=CASP7</a>         |
| MIR483    | MicroRNA 483                                               | RNA Gene       | 20 | GC11M003297 | 3.240749 | <a href="https://www.genecards.org/cgi-bin/carddisp.pl?gene=MIR483">https://www.genecards.org/cgi-bin/carddisp.pl?gene=MIR483</a>       |
| CYP21A2   | Cytochrome P450 Family 21 Subfamily A Member 2             | Protein Coding | 44 | GC06P083719 | 3.234226 | <a href="https://www.genecards.org/cgi-bin/carddisp.pl?gene=CYP21A2">https://www.genecards.org/cgi-bin/carddisp.pl?gene=CYP21A2</a>     |
| CYP21A1P  | Cytochrome P450 Family 21 Subfamily A Member 1, Pseudogene | Pseudo gene    | 16 | GC06P032005 | 3.233522 | <a href="https://www.genecards.org/cgi-bin/carddisp.pl?gene=CYP21A1P">https://www.genecards.org/cgi-bin/carddisp.pl?gene=CYP21A1P</a>   |
| KLRC1     | Killer Cell Lectin Like Receptor C1                        | Protein Coding | 41 | GC12M021112 | 3.232145 | <a href="https://www.genecards.org/cgi-bin/carddisp.pl?gene=KLRC1">https://www.genecards.org/cgi-bin/carddisp.pl?gene=KLRC1</a>         |

|         |                                          |                |    |             |          |                                                                                                                                            |
|---------|------------------------------------------|----------------|----|-------------|----------|--------------------------------------------------------------------------------------------------------------------------------------------|
|         |                                          |                |    |             |          | <a href="http://www.ncbi.nlm.nih.gov/ncbi/cdd/bin/carddisp.pl?gene=KLRC1">bin/carddisp.pl?gene=KLRC1</a>                                   |
| NCF2    | Neutrophil Cytosolic Factor 2            | Protein Coding | 45 | GC01M183555 | 3.229803 | <a href="http://www.ncbi.nlm.nih.gov/ncbi/cdd/bin/carddisp.pl?gene=NCF2">https://www.genecards.org/cgi-bin/carddisp.pl?gene=NCF2</a>       |
| ARHGEF3 | Rho Guanine Nucleotide Exchange Factor 3 | Protein Coding | 40 | GC03M056736 | 3.229774 | <a href="http://www.ncbi.nlm.nih.gov/ncbi/cdd/bin/carddisp.pl?gene=ARHGEF3">https://www.genecards.org/cgi-bin/carddisp.pl?gene=ARHGEF3</a> |
| RFC1    | Replication Factor C Subunit 1           | Protein Coding | 46 | GC04M039291 | 3.227977 | <a href="http://www.ncbi.nlm.nih.gov/ncbi/cdd/bin/carddisp.pl?gene=RFC1">https://www.genecards.org/cgi-bin/carddisp.pl?gene=RFC1</a>       |
| LPL     | Lipoprotein Lipase                       | Protein Coding | 48 | GC08P019901 | 3.224157 | <a href="http://www.ncbi.nlm.nih.gov/ncbi/cdd/bin/carddisp.pl?gene=LPL">https://www.genecards.org/cgi-bin/carddisp.pl?gene=LPL</a>         |
| MIR27A  | MicroRNA 27a                             | RNA Gene       | 23 | GC19M014484 | 3.223328 | <a href="http://www.ncbi.nlm.nih.gov/ncbi/cdd/bin/carddisp.pl?gene=MIR27A">https://www.genecards.org/cgi-bin/carddisp.pl?gene=MIR27A</a>   |
| IL20RB  | Interleukin 20 Receptor Subunit Beta     | Protein Coding | 36 | GC03P136946 | 3.222666 | <a href="http://www.ncbi.nlm.nih.gov/ncbi/cdd/bin/carddisp.pl?gene=IL20RB">https://www.genecards.org/cgi-bin/carddisp.pl?gene=IL20RB</a>   |
| FOXO1   | Forkhead Box O1                          | Protein Coding | 47 | GC13M040555 | 3.217533 | <a href="http://www.ncbi.nlm.nih.gov/ncbi/cdd/bin/carddisp.pl?gene=FOXO1">https://www.genecards.org/cgi-bin/carddisp.pl?gene=FOXO1</a>     |
| CD22    | CD22 Molecule                            | Protein Coding | 44 | GC19P035319 | 3.214668 | <a href="http://www.ncbi.nlm.nih.gov/ncbi/cdd/bin/carddisp.pl?gene=CD22">https://www.genecards.org/cgi-bin/carddisp.pl?gene=CD22</a>       |
| PF4     | Platelet Factor 4                        | Protein Coding | 39 | GC04M073980 | 3.210268 | <a href="http://www.ncbi.nlm.nih.gov/ncbi/cdd/bin/carddisp.pl?gene=PF4">https://www.genecards.org/cgi-bin/carddisp.pl?gene=PF4</a>         |
| AXL     | AXL Receptor Tyrosine Kinase             | Protein Coding | 50 | GC19P041219 | 3.205276 | <a href="http://www.ncbi.nlm.nih.gov/ncbi/cdd/bin/carddisp.pl?gene=AXL">https://www.genecards.org/cgi-bin/carddisp.pl?gene=AXL</a>         |
| FOXO3   | Forkhead Box O3                          | Protein Coding | 44 | GC06P108559 | 3.204709 | <a href="http://www.ncbi.nlm.nih.gov/ncbi/cdd/bin/carddisp.pl?gene=FOXO3">https://www.genecards.org/cgi-bin/carddisp.pl?gene=FOXO3</a>     |
| DNMT3A  | DNA Methyltransferase 3 Alpha            | Protein Coding | 49 | GC02M025228 | 3.195729 | <a href="http://www.ncbi.nlm.nih.gov/ncbi/cdd/bin/carddisp.pl?gene=DNMT3A">https://www.genecards.org/cgi-bin/carddisp.pl?gene=DNMT3A</a>   |
| DUSP22  | Dual Specificity Phosphatase 22          | Protein Coding | 38 | GC06P000302 | 3.19063  | <a href="http://www.ncbi.nlm.nih.gov/ncbi/cdd/bin/carddisp.pl?gene=DUSP22">https://www.genecards.org/cgi-bin/carddisp.pl?gene=DUSP22</a>   |

|          |                                                                     |                |    |             |          |                                                                                                                                       |
|----------|---------------------------------------------------------------------|----------------|----|-------------|----------|---------------------------------------------------------------------------------------------------------------------------------------|
| ALOX5AP  | Arachidonate 5-Lipoxygenase Activating Protein                      | Protein Coding | 42 | GC13P030713 | 3.185986 | <a href="https://www.genecards.org/cgi-bin/carddisp.pl?gene=ALOX5AP">https://www.genecards.org/cgi-bin/carddisp.pl?gene=ALOX5AP</a>   |
| CYCS     | Cytochrome C, Somatic                                               | Protein Coding | 46 | GC07M025118 | 3.182876 | <a href="https://www.genecards.org/cgi-bin/carddisp.pl?gene=CYCS">https://www.genecards.org/cgi-bin/carddisp.pl?gene=CYCS</a>         |
| FLNB     | Filamin B                                                           | Protein Coding | 46 | GC03P058008 | 3.182026 | <a href="https://www.genecards.org/cgi-bin/carddisp.pl?gene=FLNB">https://www.genecards.org/cgi-bin/carddisp.pl?gene=FLNB</a>         |
| C1QA     | Complement C1q A Chain                                              | Protein Coding | 45 | GC01P022636 | 3.180901 | <a href="https://www.genecards.org/cgi-bin/carddisp.pl?gene=C1QA">https://www.genecards.org/cgi-bin/carddisp.pl?gene=C1QA</a>         |
| IKBKG    | Inhibitor Of Nuclear Factor Kappa B Kinase Regulatory Subunit Gamma | Protein Coding | 46 | GC0XP154541 | 3.180798 | <a href="https://www.genecards.org/cgi-bin/carddisp.pl?gene=IKBKG">https://www.genecards.org/cgi-bin/carddisp.pl?gene=IKBKG</a>       |
| HLA-E    | Major Histocompatibility Complex, Class I, E                        | Protein Coding | 41 | GC06P083670 | 3.179679 | <a href="https://www.genecards.org/cgi-bin/carddisp.pl?gene=HLA-E">https://www.genecards.org/cgi-bin/carddisp.pl?gene=HLA-E</a>       |
| HTR3A    | 5-Hydroxytryptamine Receptor 3A                                     | Protein Coding | 45 | GC11P113974 | 3.176747 | <a href="https://www.genecards.org/cgi-bin/carddisp.pl?gene=HTR3A">https://www.genecards.org/cgi-bin/carddisp.pl?gene=HTR3A</a>       |
| MIR124-1 | MicroRNA 124-1                                                      | RNA Gene       | 21 | GC08M009903 | 3.164538 | <a href="https://www.genecards.org/cgi-bin/carddisp.pl?gene=MIR124-1">https://www.genecards.org/cgi-bin/carddisp.pl?gene=MIR124-1</a> |
| TAB2     | TGF-Beta Activated Kinase 1 (MAP3K7) Binding Protein 2              | Protein Coding | 46 | GC06P149218 | 3.163508 | <a href="https://www.genecards.org/cgi-bin/carddisp.pl?gene=TAB2">https://www.genecards.org/cgi-bin/carddisp.pl?gene=TAB2</a>         |
| WNT5A    | Wnt Family Member 5A                                                | Protein Coding | 48 | GC03M055465 | 3.161349 | <a href="https://www.genecards.org/cgi-bin/carddisp.pl?gene=WNT5A">https://www.genecards.org/cgi-bin/carddisp.pl?gene=WNT5A</a>       |
| FAP      | Fibroblast Activation Protein Alpha                                 | Protein Coding | 44 | GC02M162170 | 3.161313 | <a href="https://www.genecards.org/cgi-bin/carddisp.pl?gene=FAP">https://www.genecards.org/cgi-bin/carddisp.pl?gene=FAP</a>           |
| CDKN3    | Cyclin Dependent Kinase Inhibitor 3                                 | Protein Coding | 42 | GC14P054398 | 3.154123 | <a href="https://www.genecards.org/cgi-bin/carddisp.pl?gene=CDKN3">https://www.genecards.org/cgi-bin/carddisp.pl?gene=CDKN3</a>       |
| BRAF     | B-Raf Proto-Oncogene, Serine/Threonine Kinase                       | Protein Coding | 50 | GC07M140737 | 3.152922 | <a href="https://www.genecards.org/cgi-bin/carddisp.pl?gene=BRAF">https://www.genecards.org/cgi-bin/carddisp.pl?gene=BRAF</a>         |
| MC4R     | Melanocortin 4 Receptor                                             | Protein Coding | 44 | GC18M060371 | 3.149513 | <a href="https://www.genecards.org/cgi-bin/carddisp.pl?gene=MC4R">https://www.genecards.org/cgi-bin/carddisp.pl?gene=MC4R</a>         |

|          |                                                    |                |    |             |          |                                                                                                                                              |
|----------|----------------------------------------------------|----------------|----|-------------|----------|----------------------------------------------------------------------------------------------------------------------------------------------|
|          |                                                    |                |    |             |          | <a href="http://www.ncbi.nlm.nih.gov/ncbi/cdd/bin/carddisp.pl?gene=MC4R">bin/carddisp.pl?gene=MC4R</a>                                       |
| VIPR1    | Vasoactive Intestinal Peptide Receptor 1           | Protein Coding | 44 | GC03P042490 | 3.148824 | <a href="http://www.ncbi.nlm.nih.gov/ncbi/cdd/bin/carddisp.pl?gene=VIPR1">https://www.genecards.org/cgi-bin/carddisp.pl?gene=VIPR1</a>       |
| PHRF1    | PHD And Ring Finger Domains 1                      | Protein Coding | 34 | GC11P001742 | 3.148697 | <a href="http://www.ncbi.nlm.nih.gov/ncbi/cdd/bin/carddisp.pl?gene=PHRF1">https://www.genecards.org/cgi-bin/carddisp.pl?gene=PHRF1</a>       |
| PDE4A    | Phosphodiesterase 4A                               | Protein Coding | 44 | GC19P010416 | 3.147764 | <a href="http://www.ncbi.nlm.nih.gov/ncbi/cdd/bin/carddisp.pl?gene=PDE4A">https://www.genecards.org/cgi-bin/carddisp.pl?gene=PDE4A</a>       |
| CFTR     | CF Transmembrane Conductance Regulator             | Protein Coding | 49 | GC07P117287 | 3.143525 | <a href="http://www.ncbi.nlm.nih.gov/ncbi/cdd/bin/carddisp.pl?gene=CFTR">https://www.genecards.org/cgi-bin/carddisp.pl?gene=CFTR</a>         |
| GAS6     | Growth Arrest Specific 6                           | Protein Coding | 44 | GC13M113820 | 3.141688 | <a href="http://www.ncbi.nlm.nih.gov/ncbi/cdd/bin/carddisp.pl?gene=GAS6">https://www.genecards.org/cgi-bin/carddisp.pl?gene=GAS6</a>         |
| ENPP2    | Ectonucleotide Pyrophosphatase/Phosphodiesterase 2 | Protein Coding | 43 | GC08M119556 | 3.138681 | <a href="http://www.ncbi.nlm.nih.gov/ncbi/cdd/bin/carddisp.pl?gene=ENPP2">https://www.genecards.org/cgi-bin/carddisp.pl?gene=ENPP2</a>       |
| SPHK1    | Sphingosine Kinase 1                               | Protein Coding | 45 | GC17P076376 | 3.133767 | <a href="http://www.ncbi.nlm.nih.gov/ncbi/cdd/bin/carddisp.pl?gene=SPHK1">https://www.genecards.org/cgi-bin/carddisp.pl?gene=SPHK1</a>       |
| PLG      | Plasminogen                                        | Protein Coding | 48 | GC06P160702 | 3.132704 | <a href="http://www.ncbi.nlm.nih.gov/ncbi/cdd/bin/carddisp.pl?gene=PLG">https://www.genecards.org/cgi-bin/carddisp.pl?gene=PLG</a>           |
| RPS12P4  | Ribosomal Protein S12 Pseudogene 4                 | Pseudo gene    | 9  | GC02M041850 | 3.132163 | <a href="http://www.ncbi.nlm.nih.gov/ncbi/cdd/bin/carddisp.pl?gene=RPS12P4">https://www.genecards.org/cgi-bin/carddisp.pl?gene=RPS12P4</a>   |
| RNASEH2A | Ribonuclease H2 Subunit A                          | Protein Coding | 42 | GC19P014276 | 3.127436 | <a href="http://www.ncbi.nlm.nih.gov/ncbi/cdd/bin/carddisp.pl?gene=RNASEH2A">https://www.genecards.org/cgi-bin/carddisp.pl?gene=RNASEH2A</a> |
| ABCC2    | ATP Binding Cassette Subfamily C Member 2          | Protein Coding | 46 | GC10P099782 | 3.125788 | <a href="http://www.ncbi.nlm.nih.gov/ncbi/cdd/bin/carddisp.pl?gene=ABCC2">https://www.genecards.org/cgi-bin/carddisp.pl?gene=ABCC2</a>       |
| CCL3L1   | C-C Motif Chemokine Ligand 3 Like 1                | Protein Coding | 28 | GC17Mj00250 | 3.120484 | <a href="http://www.ncbi.nlm.nih.gov/ncbi/cdd/bin/carddisp.pl?gene=CCL3L1">https://www.genecards.org/cgi-bin/carddisp.pl?gene=CCL3L1</a>     |
| SEMA3C   | Semaphorin 3C                                      | Protein Coding | 43 | GC07M080742 | 3.116683 | <a href="http://www.ncbi.nlm.nih.gov/ncbi/cdd/bin/carddisp.pl?gene=SEMA3C">https://www.genecards.org/cgi-bin/carddisp.pl?gene=SEMA3C</a>     |

|          |                                                                    |                |    |             |          |                                                                                                                                       |
|----------|--------------------------------------------------------------------|----------------|----|-------------|----------|---------------------------------------------------------------------------------------------------------------------------------------|
| SOD3     | Superoxide Dismutase 3                                             | Protein Coding | 41 | GC04P024798 | 3.111549 | <a href="https://www.genecards.org/cgi-bin/carddisp.pl?gene=SOD3">https://www.genecards.org/cgi-bin/carddisp.pl?gene=SOD3</a>         |
| TCN1     | Transcobalamin 1                                                   | Protein Coding | 41 | GC11M089510 | 3.111306 | <a href="https://www.genecards.org/cgi-bin/carddisp.pl?gene=TCN1">https://www.genecards.org/cgi-bin/carddisp.pl?gene=TCN1</a>         |
| EZH2     | Enhancer Of Zeste 2 Polycomb Repressive Complex 2 Subunit          | Protein Coding | 52 | GC07M148807 | 3.109519 | <a href="https://www.genecards.org/cgi-bin/carddisp.pl?gene=EZH2">https://www.genecards.org/cgi-bin/carddisp.pl?gene=EZH2</a>         |
| CCL15    | C-C Motif Chemokine Ligand 15                                      | Protein Coding | 34 | GC17M035996 | 3.106022 | <a href="https://www.genecards.org/cgi-bin/carddisp.pl?gene=CCL15">https://www.genecards.org/cgi-bin/carddisp.pl?gene=CCL15</a>       |
| OSCAR    | Osteoclast Associated Ig-Like Receptor                             | Protein Coding | 37 | GC19M054094 | 3.10577  | <a href="https://www.genecards.org/cgi-bin/carddisp.pl?gene=OSCAR">https://www.genecards.org/cgi-bin/carddisp.pl?gene=OSCAR</a>       |
| ATG16L1  | Autophagy Related 16 Like 1                                        | Protein Coding | 41 | GC02P233253 | 3.103968 | <a href="https://www.genecards.org/cgi-bin/carddisp.pl?gene=ATG16L1">https://www.genecards.org/cgi-bin/carddisp.pl?gene=ATG16L1</a>   |
| HLA-DRB9 | Major Histocompatibility Complex, Class II, DR Beta 9 (Pseudogene) | Pseudo gene    | 13 | GC06M066001 | 3.103507 | <a href="https://www.genecards.org/cgi-bin/carddisp.pl?gene=HLA-DRB9">https://www.genecards.org/cgi-bin/carddisp.pl?gene=HLA-DRB9</a> |
| RNASEH2C | Ribonuclease H2 Subunit C                                          | Protein Coding | 38 | GC11M065714 | 3.099708 | <a href="https://www.genecards.org/cgi-bin/carddisp.pl?gene=RNASEH2C">https://www.genecards.org/cgi-bin/carddisp.pl?gene=RNASEH2C</a> |
| CNR1     | Cannabinoid Receptor 1                                             | Protein Coding | 45 | GC06M088139 | 3.099246 | <a href="https://www.genecards.org/cgi-bin/carddisp.pl?gene=CNR1">https://www.genecards.org/cgi-bin/carddisp.pl?gene=CNR1</a>         |
| CHRNA7   | Cholinergic Receptor Nicotinic Alpha 7 Subunit                     | Protein Coding | 44 | GC15P031923 | 3.095434 | <a href="https://www.genecards.org/cgi-bin/carddisp.pl?gene=CHRNA7">https://www.genecards.org/cgi-bin/carddisp.pl?gene=CHRNA7</a>     |
| MMP16    | Matrix Metalloproteinase 16                                        | Protein Coding | 43 | GC08M088032 | 3.094251 | <a href="https://www.genecards.org/cgi-bin/carddisp.pl?gene=MMP16">https://www.genecards.org/cgi-bin/carddisp.pl?gene=MMP16</a>       |
| APLN     | Apelin                                                             | Protein Coding | 36 | GC0XM129645 | 3.088194 | <a href="https://www.genecards.org/cgi-bin/carddisp.pl?gene=APLN">https://www.genecards.org/cgi-bin/carddisp.pl?gene=APLN</a>         |
| TIRAP    | TIR Domain Containing Adaptor Protein                              | Protein Coding | 41 | GC11P126284 | 3.084987 | <a href="https://www.genecards.org/cgi-bin/carddisp.pl?gene=TIRAP">https://www.genecards.org/cgi-bin/carddisp.pl?gene=TIRAP</a>       |
| NRP1     | Neuropilin 1                                                       | Protein Coding | 45 | GC10M033177 | 3.081483 | <a href="https://www.genecards.org/cgi-">https://www.genecards.org/cgi-</a>                                                           |

|          |                                                       |                |    |             |          |                                                                                                                                              |
|----------|-------------------------------------------------------|----------------|----|-------------|----------|----------------------------------------------------------------------------------------------------------------------------------------------|
|          |                                                       |                |    |             |          | <a href="http://www.ncbi.nlm.nih.gov/ncbi/cdd/bin/carddisp.pl?gene=NRP1">bin/carddisp.pl?gene=NRP1</a>                                       |
| EFEMP1   | EGF Containing Fibulin Extracellular Matrix Protein 1 | Protein Coding | 44 | GC02M055865 | 3.081483 | <a href="http://www.ncbi.nlm.nih.gov/ncbi/cdd/bin/carddisp.pl?gene=EFEMP1">https://www.genecards.org/cgi-bin/carddisp.pl?gene=EFEMP1</a>     |
| QPCT     | Glutaminy1-Peptide Cyclotransferase                   | Protein Coding | 43 | GC02P037344 | 3.078385 | <a href="http://www.ncbi.nlm.nih.gov/ncbi/cdd/bin/carddisp.pl?gene=QPCT">https://www.genecards.org/cgi-bin/carddisp.pl?gene=QPCT</a>         |
| CD200R1  | CD200 Receptor 1                                      | Protein Coding | 38 | GC03M112921 | 3.073316 | <a href="http://www.ncbi.nlm.nih.gov/ncbi/cdd/bin/carddisp.pl?gene=CD200R1">https://www.genecards.org/cgi-bin/carddisp.pl?gene=CD200R1</a>   |
| MAP2K3   | Mitogen-Activated Protein Kinase Kinase 3             | Protein Coding | 46 | GC17P054789 | 3.073071 | <a href="http://www.ncbi.nlm.nih.gov/ncbi/cdd/bin/carddisp.pl?gene=MAP2K3">https://www.genecards.org/cgi-bin/carddisp.pl?gene=MAP2K3</a>     |
| SLC17A1  | Solute Carrier Family 17 Member 1                     | Protein Coding | 39 | GC06M025723 | 3.072752 | <a href="http://www.ncbi.nlm.nih.gov/ncbi/cdd/bin/carddisp.pl?gene=SLC17A1">https://www.genecards.org/cgi-bin/carddisp.pl?gene=SLC17A1</a>   |
| SERPINF1 | Serpin Family F Member 1                              | Protein Coding | 44 | GC17P001761 | 3.071793 | <a href="http://www.ncbi.nlm.nih.gov/ncbi/cdd/bin/carddisp.pl?gene=SERPINF1">https://www.genecards.org/cgi-bin/carddisp.pl?gene=SERPINF1</a> |
| PFKFB3   | 6-Phosphofructo-2-Kinase/Fructose-2,6-Biphosphatase 3 | Protein Coding | 43 | GC10P006144 | 3.069526 | <a href="http://www.ncbi.nlm.nih.gov/ncbi/cdd/bin/carddisp.pl?gene=PFKFB3">https://www.genecards.org/cgi-bin/carddisp.pl?gene=PFKFB3</a>     |
| BMS1P20  | BMS1 Pseudogene 20                                    | Pseudo gene    | 16 | GC22P022298 | 3.069526 | <a href="http://www.ncbi.nlm.nih.gov/ncbi/cdd/bin/carddisp.pl?gene=BMS1P20">https://www.genecards.org/cgi-bin/carddisp.pl?gene=BMS1P20</a>   |
| YY1      | YY1 Transcription Factor                              | Protein Coding | 46 | GC14P100238 | 3.066354 | <a href="http://www.ncbi.nlm.nih.gov/ncbi/cdd/bin/carddisp.pl?gene=YY1">https://www.genecards.org/cgi-bin/carddisp.pl?gene=YY1</a>           |
| KLRB1    | Killer Cell Lectin Like Receptor B1                   | Protein Coding | 39 | GC12M021098 | 3.063033 | <a href="http://www.ncbi.nlm.nih.gov/ncbi/cdd/bin/carddisp.pl?gene=KLRB1">https://www.genecards.org/cgi-bin/carddisp.pl?gene=KLRB1</a>       |
| EBI3     | Epstein-Barr Virus Induced 3                          | Protein Coding | 37 | GC19P004233 | 3.062869 | <a href="http://www.ncbi.nlm.nih.gov/ncbi/cdd/bin/carddisp.pl?gene=EBI3">https://www.genecards.org/cgi-bin/carddisp.pl?gene=EBI3</a>         |
| TIA1     | TIA1 Cytotoxic Granule Associated RNA Binding Protein | Protein Coding | 42 | GC02M070209 | 3.062519 | <a href="http://www.ncbi.nlm.nih.gov/ncbi/cdd/bin/carddisp.pl?gene=TIA1">https://www.genecards.org/cgi-bin/carddisp.pl?gene=TIA1</a>         |
| HDAC9    | Histone Deacetylase 9                                 | Protein Coding | 46 | GC07P018086 | 3.061987 | <a href="http://www.ncbi.nlm.nih.gov/ncbi/cdd/bin/carddisp.pl?gene=HDAC9">https://www.genecards.org/cgi-bin/carddisp.pl?gene=HDAC9</a>       |

|          |                                                     |                |    |             |          |                                                                                                                                       |
|----------|-----------------------------------------------------|----------------|----|-------------|----------|---------------------------------------------------------------------------------------------------------------------------------------|
| IL17RC   | Interleukin 17 Receptor C                           | Protein Coding | 38 | GC03P009917 | 3.061243 | <a href="https://www.genecards.org/cgi-bin/carddisp.pl?gene=IL17RC">https://www.genecards.org/cgi-bin/carddisp.pl?gene=IL17RC</a>     |
| BAG6     | BAG Cochaperone 6                                   | Protein Coding | 36 | GC06M031639 | 3.060708 | <a href="https://www.genecards.org/cgi-bin/carddisp.pl?gene=BAG6">https://www.genecards.org/cgi-bin/carddisp.pl?gene=BAG6</a>         |
| STAT5A   | Signal Transducer And Activator Of Transcription 5A | Protein Coding | 45 | GC17P042287 | 3.055726 | <a href="https://www.genecards.org/cgi-bin/carddisp.pl?gene=STAT5A">https://www.genecards.org/cgi-bin/carddisp.pl?gene=STAT5A</a>     |
| HSP90AB1 | Heat Shock Protein 90 Alpha Family Class B Member 1 | Protein Coding | 46 | GC06P044246 | 3.052162 | <a href="https://www.genecards.org/cgi-bin/carddisp.pl?gene=HSP90AB1">https://www.genecards.org/cgi-bin/carddisp.pl?gene=HSP90AB1</a> |
| DNASE2   | Deoxyribonuclease 2, Lysosomal                      | Protein Coding | 39 | GC19M012875 | 3.051737 | <a href="https://www.genecards.org/cgi-bin/carddisp.pl?gene=DNASE2">https://www.genecards.org/cgi-bin/carddisp.pl?gene=DNASE2</a>     |
| IL36A    | Interleukin 36 Alpha                                | Protein Coding | 36 | GC02P113005 | 3.050442 | <a href="https://www.genecards.org/cgi-bin/carddisp.pl?gene=IL36A">https://www.genecards.org/cgi-bin/carddisp.pl?gene=IL36A</a>       |
| TNC      | Tenascin C                                          | Protein Coding | 47 | GC09M115019 | 3.050395 | <a href="https://www.genecards.org/cgi-bin/carddisp.pl?gene=TNC">https://www.genecards.org/cgi-bin/carddisp.pl?gene=TNC</a>           |
| TNFSF18  | TNF Superfamily Member 18                           | Protein Coding | 37 | GC01M173009 | 3.046634 | <a href="https://www.genecards.org/cgi-bin/carddisp.pl?gene=TNFSF18">https://www.genecards.org/cgi-bin/carddisp.pl?gene=TNFSF18</a>   |
| MAP2K7   | Mitogen-Activated Protein Kinase Kinase 7           | Protein Coding | 44 | GC19P007903 | 3.045817 | <a href="https://www.genecards.org/cgi-bin/carddisp.pl?gene=MAP2K7">https://www.genecards.org/cgi-bin/carddisp.pl?gene=MAP2K7</a>     |
| PYCARD   | PYD And CARD Domain Containing                      | Protein Coding | 40 | GC16M031201 | 3.041759 | <a href="https://www.genecards.org/cgi-bin/carddisp.pl?gene=PYCARD">https://www.genecards.org/cgi-bin/carddisp.pl?gene=PYCARD</a>     |
| HOXD13   | Homeobox D13                                        | Protein Coding | 41 | GC02P176092 | 3.039764 | <a href="https://www.genecards.org/cgi-bin/carddisp.pl?gene=HOXD13">https://www.genecards.org/cgi-bin/carddisp.pl?gene=HOXD13</a>     |
| MIR222   | MicroRNA 222                                        | RNA Gene       | 21 | GC0XM045747 | 3.037139 | <a href="https://www.genecards.org/cgi-bin/carddisp.pl?gene=MIR222">https://www.genecards.org/cgi-bin/carddisp.pl?gene=MIR222</a>     |
| RTKN2    | Rhotekin 2                                          | Protein Coding | 35 | GC10M062183 | 3.036466 | <a href="https://www.genecards.org/cgi-bin/carddisp.pl?gene=RTKN2">https://www.genecards.org/cgi-bin/carddisp.pl?gene=RTKN2</a>       |
| MAPK3    | Mitogen-Activated Protein Kinase 3                  | Protein Coding | 46 | GC16M037120 | 3.034573 | <a href="https://www.genecards.org/cgi-bin/carddisp.pl?gene=MAPK3">https://www.genecards.org/cgi-bin/carddisp.pl?gene=MAPK3</a>       |



|          |                                                           |                |    |             |          |                                                                                                                                              |
|----------|-----------------------------------------------------------|----------------|----|-------------|----------|----------------------------------------------------------------------------------------------------------------------------------------------|
|          |                                                           |                |    |             |          | <a href="http://www.ncbi.nlm.nih.gov/ncbi/cdd/bin/carddisp.pl?gene=MAPK3">bin/carddisp.pl?gene=MAPK3</a>                                     |
| SLAMF1   | Signaling Lymphocytic Activation Molecule Family Member 1 | Protein Coding | 40 | GC01M160608 | 3.02949  | <a href="http://www.ncbi.nlm.nih.gov/ncbi/cdd/bin/carddisp.pl?gene=SLAMF1">https://www.genecards.org/cgi-bin/carddisp.pl?gene=SLAMF1</a>     |
| ADAMTSL1 | ADAMTS Like 1                                             | Protein Coding | 41 | GC09P017906 | 3.028688 | <a href="http://www.ncbi.nlm.nih.gov/ncbi/cdd/bin/carddisp.pl?gene=ADAMTSL1">https://www.genecards.org/cgi-bin/carddisp.pl?gene=ADAMTSL1</a> |
| USH2A    | Usherin                                                   | Protein Coding | 38 | GC01M215622 | 3.026695 | <a href="http://www.ncbi.nlm.nih.gov/ncbi/cdd/bin/carddisp.pl?gene=USH2A">https://www.genecards.org/cgi-bin/carddisp.pl?gene=USH2A</a>       |
| ADSL     | Adenylosuccinate Lyase                                    | Protein Coding | 46 | GC22P040346 | 3.019983 | <a href="http://www.ncbi.nlm.nih.gov/ncbi/cdd/bin/carddisp.pl?gene=ADSL">https://www.genecards.org/cgi-bin/carddisp.pl?gene=ADSL</a>         |
| PSENEN   | Presenilin Enhancer, Gamma-Secretase Subunit              | Protein Coding | 42 | GC19P066549 | 3.014358 | <a href="http://www.ncbi.nlm.nih.gov/ncbi/cdd/bin/carddisp.pl?gene=PSENEN">https://www.genecards.org/cgi-bin/carddisp.pl?gene=PSENEN</a>     |
| SCGB1A1  | Secretoglobin Family 1A Member 1                          | Protein Coding | 39 | GC11P062405 | 3.013911 | <a href="http://www.ncbi.nlm.nih.gov/ncbi/cdd/bin/carddisp.pl?gene=SCGB1A1">https://www.genecards.org/cgi-bin/carddisp.pl?gene=SCGB1A1</a>   |
| FCGR2C   | Fc Gamma Receptor IIc (Gene/Pseudogene)                   | Protein Coding | 35 | GC01P161718 | 3.01309  | <a href="http://www.ncbi.nlm.nih.gov/ncbi/cdd/bin/carddisp.pl?gene=FCGR2C">https://www.genecards.org/cgi-bin/carddisp.pl?gene=FCGR2C</a>     |
| BAD      | BCL2 Associated Agonist Of Cell Death                     | Protein Coding | 43 | GC11M089708 | 3.011511 | <a href="http://www.ncbi.nlm.nih.gov/ncbi/cdd/bin/carddisp.pl?gene=BAD">https://www.genecards.org/cgi-bin/carddisp.pl?gene=BAD</a>           |
| SYNGR1   | Synaptogyrin 1                                            | Protein Coding | 40 | GC22P039350 | 3.009294 | <a href="http://www.ncbi.nlm.nih.gov/ncbi/cdd/bin/carddisp.pl?gene=SYNGR1">https://www.genecards.org/cgi-bin/carddisp.pl?gene=SYNGR1</a>     |
| ALDH2    | Aldehyde Dehydrogenase 2 Family Member                    | Protein Coding | 49 | GC12P111766 | 3.007002 | <a href="http://www.ncbi.nlm.nih.gov/ncbi/cdd/bin/carddisp.pl?gene=ALDH2">https://www.genecards.org/cgi-bin/carddisp.pl?gene=ALDH2</a>       |
| SLPI     | Secretory Leukocyte Peptidase Inhibitor                   | Protein Coding | 39 | GC20M045252 | 3.006694 | <a href="http://www.ncbi.nlm.nih.gov/ncbi/cdd/bin/carddisp.pl?gene=SLPI">https://www.genecards.org/cgi-bin/carddisp.pl?gene=SLPI</a>         |
| IL31     | Interleukin 31                                            | Protein Coding | 34 | GC12M122295 | 3.000791 | <a href="http://www.ncbi.nlm.nih.gov/ncbi/cdd/bin/carddisp.pl?gene=IL31">https://www.genecards.org/cgi-bin/carddisp.pl?gene=IL31</a>         |
| RBP4     | Retinol Binding Protein 4                                 | Protein Coding | 44 | GC10M093591 | 2.99993  | <a href="http://www.ncbi.nlm.nih.gov/ncbi/cdd/bin/carddisp.pl?gene=RBP4">https://www.genecards.org/cgi-bin/carddisp.pl?gene=RBP4</a>         |

|         |                                                   |                |    |             |          |                                                                                                                                     |
|---------|---------------------------------------------------|----------------|----|-------------|----------|-------------------------------------------------------------------------------------------------------------------------------------|
| ICA1    | Islet Cell Autoantigen 1                          | Protein Coding | 40 | GC07M008206 | 2.99347  | <a href="https://www.genecards.org/cgi-bin/carddisp.pl?gene=ICA1">https://www.genecards.org/cgi-bin/carddisp.pl?gene=ICA1</a>       |
| PLOD2   | Procollagen-Lysine,2-Oxoglutarate 5-Dioxygenase 2 | Protein Coding | 44 | GC03M146069 | 2.993037 | <a href="https://www.genecards.org/cgi-bin/carddisp.pl?gene=PLOD2">https://www.genecards.org/cgi-bin/carddisp.pl?gene=PLOD2</a>     |
| SEMA4D  | Semaphorin 4D                                     | Protein Coding | 45 | GC09M089360 | 2.992128 | <a href="https://www.genecards.org/cgi-bin/carddisp.pl?gene=SEMA4D">https://www.genecards.org/cgi-bin/carddisp.pl?gene=SEMA4D</a>   |
| APP     | Amyloid Beta Precursor Protein                    | Protein Coding | 49 | GC21M025880 | 2.991846 | <a href="https://www.genecards.org/cgi-bin/carddisp.pl?gene=APP">https://www.genecards.org/cgi-bin/carddisp.pl?gene=APP</a>         |
| CCL1    | C-C Motif Chemokine Ligand 1                      | Protein Coding | 36 | GC17M035584 | 2.991845 | <a href="https://www.genecards.org/cgi-bin/carddisp.pl?gene=CCL1">https://www.genecards.org/cgi-bin/carddisp.pl?gene=CCL1</a>       |
| FNDC1   | Fibronectin Type III Domain Containing 1          | Protein Coding | 34 | GC06P160538 | 2.985362 | <a href="https://www.genecards.org/cgi-bin/carddisp.pl?gene=FNDC1">https://www.genecards.org/cgi-bin/carddisp.pl?gene=FNDC1</a>     |
| MIR99B  | MicroRNA 99b                                      | RNA Gene       | 20 | GC19P051692 | 2.9807   | <a href="https://www.genecards.org/cgi-bin/carddisp.pl?gene=MIR99B">https://www.genecards.org/cgi-bin/carddisp.pl?gene=MIR99B</a>   |
| BCL2L11 | BCL2 Like 11                                      | Protein Coding | 42 | GC02P111119 | 2.978083 | <a href="https://www.genecards.org/cgi-bin/carddisp.pl?gene=BCL2L11">https://www.genecards.org/cgi-bin/carddisp.pl?gene=BCL2L11</a> |
| BST2    | Bone Marrow Stromal Cell Antigen 2                | Protein Coding | 38 | GC19M017403 | 2.977444 | <a href="https://www.genecards.org/cgi-bin/carddisp.pl?gene=BST2">https://www.genecards.org/cgi-bin/carddisp.pl?gene=BST2</a>       |
| IL12RB2 | Interleukin 12 Receptor Subunit Beta 2            | Protein Coding | 42 | GC01P067307 | 2.975707 | <a href="https://www.genecards.org/cgi-bin/carddisp.pl?gene=IL12RB2">https://www.genecards.org/cgi-bin/carddisp.pl?gene=IL12RB2</a> |
| ATF2    | Activating Transcription Factor 2                 | Protein Coding | 44 | GC02M175072 | 2.975466 | <a href="https://www.genecards.org/cgi-bin/carddisp.pl?gene=ATF2">https://www.genecards.org/cgi-bin/carddisp.pl?gene=ATF2</a>       |
| NCF4    | Neutrophil Cytosolic Factor 4                     | Protein Coding | 46 | GC22P036860 | 2.973231 | <a href="https://www.genecards.org/cgi-bin/carddisp.pl?gene=NCF4">https://www.genecards.org/cgi-bin/carddisp.pl?gene=NCF4</a>       |
| CISH    | Cytokine Inducible SH2 Containing Protein         | Protein Coding | 44 | GC03M051268 | 2.971012 | <a href="https://www.genecards.org/cgi-bin/carddisp.pl?gene=CISH">https://www.genecards.org/cgi-bin/carddisp.pl?gene=CISH</a>       |
| FOXJ1   | Forkhead Box J1                                   | Protein Coding | 37 | GC17M076136 | 2.969518 | <a href="https://www.genecards.org/cgi-">https://www.genecards.org/cgi-</a>                                                         |

|         |                                                |                |    |             |          |                                                                                                                                            |
|---------|------------------------------------------------|----------------|----|-------------|----------|--------------------------------------------------------------------------------------------------------------------------------------------|
|         |                                                |                |    |             |          | <a href="http://www.ncbi.nlm.nih.gov/ncbi/cdd/bin/carddisp.pl?gene=FOXJ1">bin/carddisp.pl?gene=FOXJ1</a>                                   |
| MAPK9   | Mitogen-Activated Protein Kinase 9             | Protein Coding | 46 | GC05M180254 | 2.965781 | <a href="http://www.ncbi.nlm.nih.gov/ncbi/cdd/bin/carddisp.pl?gene=MAPK9">https://www.genecards.org/cgi-bin/carddisp.pl?gene=MAPK9</a>     |
| MMP20   | Matrix Metalloproteinase 20                    | Protein Coding | 44 | GC11M102576 | 2.964606 | <a href="http://www.ncbi.nlm.nih.gov/ncbi/cdd/bin/carddisp.pl?gene=MMP20">https://www.genecards.org/cgi-bin/carddisp.pl?gene=MMP20</a>     |
| PERP    | P53 Apoptosis Effector Related To PMP22        | Protein Coding | 40 | GC06M138088 | 2.95774  | <a href="http://www.ncbi.nlm.nih.gov/ncbi/cdd/bin/carddisp.pl?gene=PERP">https://www.genecards.org/cgi-bin/carddisp.pl?gene=PERP</a>       |
| DDX58   | DEXD/H-Box Helicase 58                         | Protein Coding | 45 | GC09M032455 | 2.956203 | <a href="http://www.ncbi.nlm.nih.gov/ncbi/cdd/bin/carddisp.pl?gene=DDX58">https://www.genecards.org/cgi-bin/carddisp.pl?gene=DDX58</a>     |
| C1S     | Complement C1s                                 | Protein Coding | 47 | GC12P021098 | 2.955665 | <a href="http://www.ncbi.nlm.nih.gov/ncbi/cdd/bin/carddisp.pl?gene=C1S">https://www.genecards.org/cgi-bin/carddisp.pl?gene=C1S</a>         |
| SDC1    | Syndecan 1                                     | Protein Coding | 41 | GC02M020200 | 2.952341 | <a href="http://www.ncbi.nlm.nih.gov/ncbi/cdd/bin/carddisp.pl?gene=SDC1">https://www.genecards.org/cgi-bin/carddisp.pl?gene=SDC1</a>       |
| RNGTT   | RNA Guanylyltransferase And 5'-Phosphatase     | Protein Coding | 41 | GC06M088609 | 2.947067 | <a href="http://www.ncbi.nlm.nih.gov/ncbi/cdd/bin/carddisp.pl?gene=RNGTT">https://www.genecards.org/cgi-bin/carddisp.pl?gene=RNGTT</a>     |
| GHR     | Growth Hormone Receptor                        | Protein Coding | 44 | GC05P042429 | 2.943426 | <a href="http://www.ncbi.nlm.nih.gov/ncbi/cdd/bin/carddisp.pl?gene=GHR">https://www.genecards.org/cgi-bin/carddisp.pl?gene=GHR</a>         |
| UGDH    | UDP-Glucose 6-Dehydrogenase                    | Protein Coding | 44 | GC04M039502 | 2.939529 | <a href="http://www.ncbi.nlm.nih.gov/ncbi/cdd/bin/carddisp.pl?gene=UGDH">https://www.genecards.org/cgi-bin/carddisp.pl?gene=UGDH</a>       |
| CYP27B1 | Cytochrome P450 Family 27 Subfamily B Member 1 | Protein Coding | 46 | GC12M057757 | 2.937761 | <a href="http://www.ncbi.nlm.nih.gov/ncbi/cdd/bin/carddisp.pl?gene=CYP27B1">https://www.genecards.org/cgi-bin/carddisp.pl?gene=CYP27B1</a> |
| PFKL    | Phosphofructokinase, Liver Type                | Protein Coding | 44 | GC21P044300 | 2.932446 | <a href="http://www.ncbi.nlm.nih.gov/ncbi/cdd/bin/carddisp.pl?gene=PFKL">https://www.genecards.org/cgi-bin/carddisp.pl?gene=PFKL</a>       |
| CD101   | CD101 Molecule                                 | Protein Coding | 38 | GC01P117001 | 2.932446 | <a href="http://www.ncbi.nlm.nih.gov/ncbi/cdd/bin/carddisp.pl?gene=CD101">https://www.genecards.org/cgi-bin/carddisp.pl?gene=CD101</a>     |
| TAX1BP1 | Tax1 Binding Protein 1                         | Protein Coding | 38 | GC07P027739 | 2.932446 | <a href="http://www.ncbi.nlm.nih.gov/ncbi/cdd/bin/carddisp.pl?gene=TAX1BP1">https://www.genecards.org/cgi-bin/carddisp.pl?gene=TAX1BP1</a> |

|          |                                                           |                |    |             |          |                                                                                                                                       |
|----------|-----------------------------------------------------------|----------------|----|-------------|----------|---------------------------------------------------------------------------------------------------------------------------------------|
| FCRL4    | Fc Receptor Like 4                                        | Protein Coding | 37 | GC01M157543 | 2.932446 | <a href="https://www.genecards.org/cgi-bin/carddisp.pl?gene=FCRL4">https://www.genecards.org/cgi-bin/carddisp.pl?gene=FCRL4</a>       |
| PHACTR3  | Phosphatase And Actin Regulator 3                         | Protein Coding | 36 | GC20P059577 | 2.932446 | <a href="https://www.genecards.org/cgi-bin/carddisp.pl?gene=PHACTR3">https://www.genecards.org/cgi-bin/carddisp.pl?gene=PHACTR3</a>   |
| TRHDE    | Thyrotropin Releasing Hormone Degrading Enzyme            | Protein Coding | 36 | GC12P072087 | 2.932446 | <a href="https://www.genecards.org/cgi-bin/carddisp.pl?gene=TRHDE">https://www.genecards.org/cgi-bin/carddisp.pl?gene=TRHDE</a>       |
| C5-OT1   | C5 3' UTR Overlapping Transcript 1                        | RNA Gene       | 8  | GC09M120944 | 2.932446 | <a href="https://www.genecards.org/cgi-bin/carddisp.pl?gene=C5-OT1">https://www.genecards.org/cgi-bin/carddisp.pl?gene=C5-OT1</a>     |
| ELP1     | Elongator Acetyltransferase Complex Subunit 1             | Protein Coding | 34 | GC09M108868 | 2.930565 | <a href="https://www.genecards.org/cgi-bin/carddisp.pl?gene=ELP1">https://www.genecards.org/cgi-bin/carddisp.pl?gene=ELP1</a>         |
| PSORS1C3 | Psoriasis Susceptibility 1 Candidate 3                    | RNA Gene       | 21 | GC06M065907 | 2.92977  | <a href="https://www.genecards.org/cgi-bin/carddisp.pl?gene=PSORS1C3">https://www.genecards.org/cgi-bin/carddisp.pl?gene=PSORS1C3</a> |
| ALPK1    | Alpha Kinase 1                                            | Protein Coding | 40 | GC04P112285 | 2.929518 | <a href="https://www.genecards.org/cgi-bin/carddisp.pl?gene=ALPK1">https://www.genecards.org/cgi-bin/carddisp.pl?gene=ALPK1</a>       |
| ARAP1    | ArfGAP With RhoGAP Domain, Ankyrin Repeat And PH Domain 1 | Protein Coding | 40 | GC11M090324 | 2.922596 | <a href="https://www.genecards.org/cgi-bin/carddisp.pl?gene=ARAP1">https://www.genecards.org/cgi-bin/carddisp.pl?gene=ARAP1</a>       |
| PCNA     | Proliferating Cell Nuclear Antigen                        | Protein Coding | 48 | GC20M005114 | 2.920493 | <a href="https://www.genecards.org/cgi-bin/carddisp.pl?gene=PCNA">https://www.genecards.org/cgi-bin/carddisp.pl?gene=PCNA</a>         |
| KEAP1    | Kelch Like ECH Associated Protein 1                       | Protein Coding | 46 | GC19M010486 | 2.919772 | <a href="https://www.genecards.org/cgi-bin/carddisp.pl?gene=KEAP1">https://www.genecards.org/cgi-bin/carddisp.pl?gene=KEAP1</a>       |
| FLT4     | Fms Related Receptor Tyrosine Kinase 4                    | Protein Coding | 49 | GC05M180607 | 2.912264 | <a href="https://www.genecards.org/cgi-bin/carddisp.pl?gene=FLT4">https://www.genecards.org/cgi-bin/carddisp.pl?gene=FLT4</a>         |
| TACR3    | Tachykinin Receptor 3                                     | Protein Coding | 48 | GC04M103586 | 2.910977 | <a href="https://www.genecards.org/cgi-bin/carddisp.pl?gene=TACR3">https://www.genecards.org/cgi-bin/carddisp.pl?gene=TACR3</a>       |
| BAK1     | BCL2 Antagonist/Killer 1                                  | Protein Coding | 42 | GC06M033572 | 2.909388 | <a href="https://www.genecards.org/cgi-bin/carddisp.pl?gene=BAK1">https://www.genecards.org/cgi-bin/carddisp.pl?gene=BAK1</a>         |
| CD1A     | CD1a Molecule                                             | Protein Coding | 40 | GC01P158255 | 2.903334 | <a href="https://www.genecards.org/cgi-">https://www.genecards.org/cgi-</a>                                                           |

|          |                                                        |                |    |             |          |                                                                                                                                              |
|----------|--------------------------------------------------------|----------------|----|-------------|----------|----------------------------------------------------------------------------------------------------------------------------------------------|
|          |                                                        |                |    |             |          | <a href="http://www.ncbi.nlm.nih.gov/ncbi/cdd/bin/carddisp.pl?gene=CD1A">bin/carddisp.pl?gene=CD1A</a>                                       |
| TGFB3    | Transforming Growth Factor Beta 3                      | Protein Coding | 45 | GC14M075958 | 2.90309  | <a href="http://www.ncbi.nlm.nih.gov/ncbi/cdd/bin/carddisp.pl?gene=TGFB3">https://www.genecards.org/cgi-bin/carddisp.pl?gene=TGFB3</a>       |
| TAB1     | TGF-Beta Activated Kinase 1 (MAP3K7) Binding Protein 1 | Protein Coding | 40 | GC22P039429 | 2.902945 | <a href="http://www.ncbi.nlm.nih.gov/ncbi/cdd/bin/carddisp.pl?gene=TAB1">https://www.genecards.org/cgi-bin/carddisp.pl?gene=TAB1</a>         |
| DDR1     | Discoidin Domain Receptor Tyrosine Kinase 1            | Protein Coding | 45 | GC06P083678 | 2.898831 | <a href="http://www.ncbi.nlm.nih.gov/ncbi/cdd/bin/carddisp.pl?gene=DDR1">https://www.genecards.org/cgi-bin/carddisp.pl?gene=DDR1</a>         |
| MAP3K2   | Mitogen-Activated Protein Kinase Kinase Kinase 2       | Protein Coding | 44 | GC02M127298 | 2.898114 | <a href="http://www.ncbi.nlm.nih.gov/ncbi/cdd/bin/carddisp.pl?gene=MAP3K2">https://www.genecards.org/cgi-bin/carddisp.pl?gene=MAP3K2</a>     |
| CASP9    | Caspase 9                                              | Protein Coding | 45 | GC01M015491 | 2.897199 | <a href="http://www.ncbi.nlm.nih.gov/ncbi/cdd/bin/carddisp.pl?gene=CASP9">https://www.genecards.org/cgi-bin/carddisp.pl?gene=CASP9</a>       |
| ZBP2     | Zona Pellucida Binding Protein 2                       | Protein Coding | 34 | GC17P055526 | 2.894372 | <a href="http://www.ncbi.nlm.nih.gov/ncbi/cdd/bin/carddisp.pl?gene=ZBP2">https://www.genecards.org/cgi-bin/carddisp.pl?gene=ZBP2</a>         |
| PTK2B    | Protein Tyrosine Kinase 2 Beta                         | Protein Coding | 47 | GC08P027311 | 2.893253 | <a href="http://www.ncbi.nlm.nih.gov/ncbi/cdd/bin/carddisp.pl?gene=PTK2B">https://www.genecards.org/cgi-bin/carddisp.pl?gene=PTK2B</a>       |
| TIMELESS | Timeless Circadian Regulator                           | Protein Coding | 38 | GC12M056416 | 2.887687 | <a href="http://www.ncbi.nlm.nih.gov/ncbi/cdd/bin/carddisp.pl?gene=TIMELESS">https://www.genecards.org/cgi-bin/carddisp.pl?gene=TIMELESS</a> |
| BCR      | BCR Activator Of RhoGEF And GTPase                     | Protein Coding | 50 | GC22P023179 | 2.884006 | <a href="http://www.ncbi.nlm.nih.gov/ncbi/cdd/bin/carddisp.pl?gene=BCR">https://www.genecards.org/cgi-bin/carddisp.pl?gene=BCR</a>           |
| MLKL     | Mixed Lineage Kinase Domain Like Pseudokinase          | Protein Coding | 40 | GC16M074672 | 2.880919 | <a href="http://www.ncbi.nlm.nih.gov/ncbi/cdd/bin/carddisp.pl?gene=MLKL">https://www.genecards.org/cgi-bin/carddisp.pl?gene=MLKL</a>         |
| IRX1     | Iroquois Homeobox 1                                    | Protein Coding | 38 | GC05P003596 | 2.878638 | <a href="http://www.ncbi.nlm.nih.gov/ncbi/cdd/bin/carddisp.pl?gene=IRX1">https://www.genecards.org/cgi-bin/carddisp.pl?gene=IRX1</a>         |
| TRD      | T Cell Receptor Delta Locus                            | Protein Coding | 13 | GC14P032626 | 2.8778   | <a href="http://www.ncbi.nlm.nih.gov/ncbi/cdd/bin/carddisp.pl?gene=TRD">https://www.genecards.org/cgi-bin/carddisp.pl?gene=TRD</a>           |
| NOTCH1   | Notch Receptor 1                                       | Protein Coding | 49 | GC09M137524 | 2.872792 | <a href="http://www.ncbi.nlm.nih.gov/ncbi/cdd/bin/carddisp.pl?gene=NOTCH1">https://www.genecards.org/cgi-bin/carddisp.pl?gene=NOTCH1</a>     |

|         |                                               |                |    |             |          |                                                                                                                                     |
|---------|-----------------------------------------------|----------------|----|-------------|----------|-------------------------------------------------------------------------------------------------------------------------------------|
| GATA4   | GATA Binding Protein 4                        | Protein Coding | 46 | GC08P011676 | 2.871077 | <a href="https://www.genecards.org/cgi-bin/carddisp.pl?gene=GATA4">https://www.genecards.org/cgi-bin/carddisp.pl?gene=GATA4</a>     |
| TXNRD1  | Thioredoxin Reductase 1                       | Protein Coding | 45 | GC12P104215 | 2.870043 | <a href="https://www.genecards.org/cgi-bin/carddisp.pl?gene=TXNRD1">https://www.genecards.org/cgi-bin/carddisp.pl?gene=TXNRD1</a>   |
| SNRNP70 | Small Nuclear Ribonucleoprotein U1 Subunit 70 | Protein Coding | 37 | GC19P049085 | 2.866608 | <a href="https://www.genecards.org/cgi-bin/carddisp.pl?gene=SNRNP70">https://www.genecards.org/cgi-bin/carddisp.pl?gene=SNRNP70</a> |
| SLC22A7 | Solute Carrier Family 22 Member 7             | Protein Coding | 41 | GC06P083920 | 2.865655 | <a href="https://www.genecards.org/cgi-bin/carddisp.pl?gene=SLC22A7">https://www.genecards.org/cgi-bin/carddisp.pl?gene=SLC22A7</a> |
| CLEC7A  | C-Type Lectin Domain Containing 7A            | Protein Coding | 44 | GC12M021105 | 2.862968 | <a href="https://www.genecards.org/cgi-bin/carddisp.pl?gene=CLEC7A">https://www.genecards.org/cgi-bin/carddisp.pl?gene=CLEC7A</a>   |
| MAPK13  | Mitogen-Activated Protein Kinase 13           | Protein Coding | 46 | GC06P083842 | 2.860585 | <a href="https://www.genecards.org/cgi-bin/carddisp.pl?gene=MAPK13">https://www.genecards.org/cgi-bin/carddisp.pl?gene=MAPK13</a>   |
| CCL27   | C-C Motif Chemokine Ligand 27                 | Protein Coding | 34 | GC09M034662 | 2.859911 | <a href="https://www.genecards.org/cgi-bin/carddisp.pl?gene=CCL27">https://www.genecards.org/cgi-bin/carddisp.pl?gene=CCL27</a>     |
| CASR    | Calcium Sensing Receptor                      | Protein Coding | 49 | GC03P122183 | 2.859241 | <a href="https://www.genecards.org/cgi-bin/carddisp.pl?gene=CASR">https://www.genecards.org/cgi-bin/carddisp.pl?gene=CASR</a>       |
| SST     | Somatostatin                                  | Protein Coding | 40 | GC03M187668 | 2.85444  | <a href="https://www.genecards.org/cgi-bin/carddisp.pl?gene=SST">https://www.genecards.org/cgi-bin/carddisp.pl?gene=SST</a>         |
| EZR     | Ezrin                                         | Protein Coding | 43 | GC06M158765 | 2.85079  | <a href="https://www.genecards.org/cgi-bin/carddisp.pl?gene=EZR">https://www.genecards.org/cgi-bin/carddisp.pl?gene=EZR</a>         |
| CD34    | CD34 Molecule                                 | Protein Coding | 42 | GC01M207880 | 2.845316 | <a href="https://www.genecards.org/cgi-bin/carddisp.pl?gene=CD34">https://www.genecards.org/cgi-bin/carddisp.pl?gene=CD34</a>       |
| NFKBIB  | NFKB Inhibitor Beta                           | Protein Coding | 40 | GC19P038899 | 2.841966 | <a href="https://www.genecards.org/cgi-bin/carddisp.pl?gene=NFKBIB">https://www.genecards.org/cgi-bin/carddisp.pl?gene=NFKBIB</a>   |
| KLRC2   | Killer Cell Lectin Like Receptor C2           | Protein Coding | 36 | GC12M021111 | 2.841174 | <a href="https://www.genecards.org/cgi-bin/carddisp.pl?gene=KLRC2">https://www.genecards.org/cgi-bin/carddisp.pl?gene=KLRC2</a>     |
| TYMP    | Thymidine Phosphorylase                       | Protein Coding | 45 | GC22M050525 | 2.838929 | <a href="https://www.genecards.org/cgi-">https://www.genecards.org/cgi-</a>                                                         |

|         |                                                     |                |    |             |          |                                                                                                                                     |
|---------|-----------------------------------------------------|----------------|----|-------------|----------|-------------------------------------------------------------------------------------------------------------------------------------|
|         |                                                     |                |    |             |          | <a href="#">bin/carddisp.pl?gene=TYMP</a>                                                                                           |
| NGFR    | Nerve Growth Factor Receptor                        | Protein Coding | 44 | GC17P049495 | 2.835482 | <a href="https://www.genecards.org/cgi-bin/carddisp.pl?gene=NGFR">https://www.genecards.org/cgi-bin/carddisp.pl?gene=NGFR</a>       |
| LAIR1   | Leukocyte Associated Immunoglobulin Like Receptor 1 | Protein Coding | 41 | GC19M054351 | 2.834127 | <a href="https://www.genecards.org/cgi-bin/carddisp.pl?gene=LAIR1">https://www.genecards.org/cgi-bin/carddisp.pl?gene=LAIR1</a>     |
| HNF4A   | Hepatocyte Nuclear Factor 4 Alpha                   | Protein Coding | 48 | GC20P044355 | 2.831234 | <a href="https://www.genecards.org/cgi-bin/carddisp.pl?gene=HNF4A">https://www.genecards.org/cgi-bin/carddisp.pl?gene=HNF4A</a>     |
| SEMA3A  | Semaphorin 3A                                       | Protein Coding | 44 | GC07M083955 | 2.830889 | <a href="https://www.genecards.org/cgi-bin/carddisp.pl?gene=SEMA3A">https://www.genecards.org/cgi-bin/carddisp.pl?gene=SEMA3A</a>   |
| CCK     | Cholecystokinin                                     | Protein Coding | 41 | GC03M042274 | 2.829787 | <a href="https://www.genecards.org/cgi-bin/carddisp.pl?gene=CCK">https://www.genecards.org/cgi-bin/carddisp.pl?gene=CCK</a>         |
| CTSC    | Cathepsin C                                         | Protein Coding | 46 | GC11M090619 | 2.82807  | <a href="https://www.genecards.org/cgi-bin/carddisp.pl?gene=CTSC">https://www.genecards.org/cgi-bin/carddisp.pl?gene=CTSC</a>       |
| IL1R2   | Interleukin 1 Receptor Type 2                       | Protein Coding | 44 | GC02P101991 | 2.823656 | <a href="https://www.genecards.org/cgi-bin/carddisp.pl?gene=IL1R2">https://www.genecards.org/cgi-bin/carddisp.pl?gene=IL1R2</a>     |
| INPP5B  | Inositol Polyphosphate-5-Phosphatase B              | Protein Coding | 41 | GC01M037860 | 2.822069 | <a href="https://www.genecards.org/cgi-bin/carddisp.pl?gene=INPP5B">https://www.genecards.org/cgi-bin/carddisp.pl?gene=INPP5B</a>   |
| FMOD    | Fibromodulin                                        | Protein Coding | 41 | GC01M203340 | 2.820914 | <a href="https://www.genecards.org/cgi-bin/carddisp.pl?gene=FMOD">https://www.genecards.org/cgi-bin/carddisp.pl?gene=FMOD</a>       |
| LPAR1   | Lysophosphatidic Acid Receptor 1                    | Protein Coding | 44 | GC09M110873 | 2.819573 | <a href="https://www.genecards.org/cgi-bin/carddisp.pl?gene=LPAR1">https://www.genecards.org/cgi-bin/carddisp.pl?gene=LPAR1</a>     |
| AGTR1   | Angiotensin II Receptor Type 1                      | Protein Coding | 48 | GC03P148697 | 2.818228 | <a href="https://www.genecards.org/cgi-bin/carddisp.pl?gene=AGTR1">https://www.genecards.org/cgi-bin/carddisp.pl?gene=AGTR1</a>     |
| CLEC12A | C-Type Lectin Domain Family 12 Member A             | Protein Coding | 38 | GC12P009951 | 2.817895 | <a href="https://www.genecards.org/cgi-bin/carddisp.pl?gene=CLEC12A">https://www.genecards.org/cgi-bin/carddisp.pl?gene=CLEC12A</a> |
| MIR204  | MicroRNA 204                                        | RNA Gene       | 24 | GC09M070809 | 2.816488 | <a href="https://www.genecards.org/cgi-bin/carddisp.pl?gene=MIR204">https://www.genecards.org/cgi-bin/carddisp.pl?gene=MIR204</a>   |

|         |                                                                                        |                |    |             |          |                                                                                                                                     |
|---------|----------------------------------------------------------------------------------------|----------------|----|-------------|----------|-------------------------------------------------------------------------------------------------------------------------------------|
| MIR146B | MicroRNA 146b                                                                          | RNA Gene       | 21 | GC10P102436 | 2.813499 | <a href="https://www.genecards.org/cgi-bin/carddisp.pl?gene=MIR146B">https://www.genecards.org/cgi-bin/carddisp.pl?gene=MIR146B</a> |
| GYPC    | Glycophorin C (Gerbich Blood Group)                                                    | Protein Coding | 42 | GC02P126655 | 2.80901  | <a href="https://www.genecards.org/cgi-bin/carddisp.pl?gene=GYPC">https://www.genecards.org/cgi-bin/carddisp.pl?gene=GYPC</a>       |
| KIR3DL1 | Killer Cell Immunoglobulin Like Receptor, Three Ig Domains And Long Cytoplasmic Tail 1 | Protein Coding | 39 | GC19P067384 | 2.806866 | <a href="https://www.genecards.org/cgi-bin/carddisp.pl?gene=KIR3DL1">https://www.genecards.org/cgi-bin/carddisp.pl?gene=KIR3DL1</a> |
| TCF7L2  | Transcription Factor 7 Like 2                                                          | Protein Coding | 45 | GC10P112950 | 2.806362 | <a href="https://www.genecards.org/cgi-bin/carddisp.pl?gene=TCF7L2">https://www.genecards.org/cgi-bin/carddisp.pl?gene=TCF7L2</a>   |
| PDGFRA  | Platelet Derived Growth Factor Receptor Alpha                                          | Protein Coding | 51 | GC04P054229 | 2.805772 | <a href="https://www.genecards.org/cgi-bin/carddisp.pl?gene=PDGFRA">https://www.genecards.org/cgi-bin/carddisp.pl?gene=PDGFRA</a>   |
| AFP     | Alpha Fetoprotein                                                                      | Protein Coding | 45 | GC04P073431 | 2.804905 | <a href="https://www.genecards.org/cgi-bin/carddisp.pl?gene=AFP">https://www.genecards.org/cgi-bin/carddisp.pl?gene=AFP</a>         |
| RUNX2   | RUNX Family Transcription Factor 2                                                     | Protein Coding | 45 | GC06P083940 | 2.801021 | <a href="https://www.genecards.org/cgi-bin/carddisp.pl?gene=RUNX2">https://www.genecards.org/cgi-bin/carddisp.pl?gene=RUNX2</a>     |
| CEACAM8 | CEA Cell Adhesion Molecule 8                                                           | Protein Coding | 38 | GC19M042580 | 2.800923 | <a href="https://www.genecards.org/cgi-bin/carddisp.pl?gene=CEACAM8">https://www.genecards.org/cgi-bin/carddisp.pl?gene=CEACAM8</a> |
| AOX1    | Aldehyde Oxidase 1                                                                     | Protein Coding | 44 | GC02P200585 | 2.792653 | <a href="https://www.genecards.org/cgi-bin/carddisp.pl?gene=AOX1">https://www.genecards.org/cgi-bin/carddisp.pl?gene=AOX1</a>       |
| TRA     | T Cell Receptor Alpha Locus                                                            | Protein Coding | 19 | GC14P021621 | 2.79131  | <a href="https://www.genecards.org/cgi-bin/carddisp.pl?gene=TRA">https://www.genecards.org/cgi-bin/carddisp.pl?gene=TRA</a>         |
| KL      | Klotho                                                                                 | Protein Coding | 45 | GC13P033016 | 2.787392 | <a href="https://www.genecards.org/cgi-bin/carddisp.pl?gene=KL">https://www.genecards.org/cgi-bin/carddisp.pl?gene=KL</a>           |
| C1R     | Complement C1r                                                                         | Protein Coding | 46 | GC12M007750 | 2.784245 | <a href="https://www.genecards.org/cgi-bin/carddisp.pl?gene=C1R">https://www.genecards.org/cgi-bin/carddisp.pl?gene=C1R</a>         |
| MST1    | Macrophage Stimulating 1                                                               | Protein Coding | 45 | GC03M049683 | 2.776713 | <a href="https://www.genecards.org/cgi-bin/carddisp.pl?gene=MST1">https://www.genecards.org/cgi-bin/carddisp.pl?gene=MST1</a>       |



|        |                                                            |                |    |             |          |                                                                                                                                   |
|--------|------------------------------------------------------------|----------------|----|-------------|----------|-----------------------------------------------------------------------------------------------------------------------------------|
| OS9    | OS9 Endoplasmic Reticulum Lectin                           | Protein Coding | 40 | GC12P057693 | 2.776713 | <a href="https://www.genecards.org/cgi-bin/carddisp.pl?gene=OS9">https://www.genecards.org/cgi-bin/carddisp.pl?gene=OS9</a>       |
| UCN    | Urocortin                                                  | Protein Coding | 36 | GC02M027308 | 2.776207 | <a href="https://www.genecards.org/cgi-bin/carddisp.pl?gene=UCN">https://www.genecards.org/cgi-bin/carddisp.pl?gene=UCN</a>       |
| TLR10  | Toll Like Receptor 10                                      | Protein Coding | 38 | GC04M038773 | 2.775997 | <a href="https://www.genecards.org/cgi-bin/carddisp.pl?gene=TLR10">https://www.genecards.org/cgi-bin/carddisp.pl?gene=TLR10</a>   |
| MITF   | Melanocyte Inducing Transcription Factor                   | Protein Coding | 46 | GC03P069788 | 2.774539 | <a href="https://www.genecards.org/cgi-bin/carddisp.pl?gene=MITF">https://www.genecards.org/cgi-bin/carddisp.pl?gene=MITF</a>     |
| PABIR2 | PABIR Family Member 2                                      | Protein Coding | 24 | GC0XM134826 | 2.774215 | <a href="https://www.genecards.org/cgi-bin/carddisp.pl?gene=PABIR2">https://www.genecards.org/cgi-bin/carddisp.pl?gene=PABIR2</a> |
| IRF7   | Interferon Regulatory Factor 7                             | Protein Coding | 46 | GC11M000612 | 2.773942 | <a href="https://www.genecards.org/cgi-bin/carddisp.pl?gene=IRF7">https://www.genecards.org/cgi-bin/carddisp.pl?gene=IRF7</a>     |
| LALBA  | Lactalbumin Alpha                                          | Protein Coding | 38 | GC12M048567 | 2.772724 | <a href="https://www.genecards.org/cgi-bin/carddisp.pl?gene=LALBA">https://www.genecards.org/cgi-bin/carddisp.pl?gene=LALBA</a>   |
| CYP2E1 | Cytochrome P450 Family 2 Subfamily E Member 1              | Protein Coding | 44 | GC10P133520 | 2.772125 | <a href="https://www.genecards.org/cgi-bin/carddisp.pl?gene=CYP2E1">https://www.genecards.org/cgi-bin/carddisp.pl?gene=CYP2E1</a> |
| LTB4R  | Leukotriene B4 Receptor                                    | Protein Coding | 43 | GC14P024311 | 2.771675 | <a href="https://www.genecards.org/cgi-bin/carddisp.pl?gene=LTB4R">https://www.genecards.org/cgi-bin/carddisp.pl?gene=LTB4R</a>   |
| CHIT1  | Chitinase 1                                                | Protein Coding | 43 | GC01M203213 | 2.769509 | <a href="https://www.genecards.org/cgi-bin/carddisp.pl?gene=CHIT1">https://www.genecards.org/cgi-bin/carddisp.pl?gene=CHIT1</a>   |
| PROC   | Protein C, Inactivator Of Coagulation Factors Va And VIIIa | Protein Coding | 48 | GC02P127418 | 2.768957 | <a href="https://www.genecards.org/cgi-bin/carddisp.pl?gene=PROC">https://www.genecards.org/cgi-bin/carddisp.pl?gene=PROC</a>     |
| PDCD5  | Programmed Cell Death 5                                    | Protein Coding | 38 | GC19P032581 | 2.767897 | <a href="https://www.genecards.org/cgi-bin/carddisp.pl?gene=PDCD5">https://www.genecards.org/cgi-bin/carddisp.pl?gene=PDCD5</a>   |
| WDR26  | WD Repeat Domain 26                                        | Protein Coding | 40 | GC01M224385 | 2.766876 | <a href="https://www.genecards.org/cgi-bin/carddisp.pl?gene=WDR26">https://www.genecards.org/cgi-bin/carddisp.pl?gene=WDR26</a>   |

|        |                                                       |                |    |             |          |                                                                                                                                   |
|--------|-------------------------------------------------------|----------------|----|-------------|----------|-----------------------------------------------------------------------------------------------------------------------------------|
| CPEB4  | Cytoplasmic Polyadenylation Element Binding Protein 4 | Protein Coding | 36 | GC05P173888 | 2.766876 | <a href="https://www.genecards.org/cgi-bin/carddisp.pl?gene=CPEB4">https://www.genecards.org/cgi-bin/carddisp.pl?gene=CPEB4</a>   |
| MOB3B  | MOB Kinase Activator 3B                               | Protein Coding | 34 | GC09M028330 | 2.766743 | <a href="https://www.genecards.org/cgi-bin/carddisp.pl?gene=MOB3B">https://www.genecards.org/cgi-bin/carddisp.pl?gene=MOB3B</a>   |
| GDF15  | Growth Differentiation Factor 15                      | Protein Coding | 40 | GC19P066244 | 2.766581 | <a href="https://www.genecards.org/cgi-bin/carddisp.pl?gene=GDF15">https://www.genecards.org/cgi-bin/carddisp.pl?gene=GDF15</a>   |
| SPRY2  | Sprouty RTK Signaling Antagonist 2                    | Protein Coding | 44 | GC13M080335 | 2.758616 | <a href="https://www.genecards.org/cgi-bin/carddisp.pl?gene=SPRY2">https://www.genecards.org/cgi-bin/carddisp.pl?gene=SPRY2</a>   |
| PLA2G5 | Phospholipase A2 Group V                              | Protein Coding | 41 | GC01P020028 | 2.757529 | <a href="https://www.genecards.org/cgi-bin/carddisp.pl?gene=PLA2G5">https://www.genecards.org/cgi-bin/carddisp.pl?gene=PLA2G5</a> |
| CMKLR1 | Chemerin Chemokine-Like Receptor 1                    | Protein Coding | 40 | GC12M108288 | 2.747658 | <a href="https://www.genecards.org/cgi-bin/carddisp.pl?gene=CMKLR1">https://www.genecards.org/cgi-bin/carddisp.pl?gene=CMKLR1</a> |
| MIR212 | MicroRNA 212                                          | RNA Gene       | 20 | GC17M002050 | 2.747593 | <a href="https://www.genecards.org/cgi-bin/carddisp.pl?gene=MIR212">https://www.genecards.org/cgi-bin/carddisp.pl?gene=MIR212</a> |
| E2F2   | E2F Transcription Factor 2                            | Protein Coding | 40 | GC01M023656 | 2.746572 | <a href="https://www.genecards.org/cgi-bin/carddisp.pl?gene=E2F2">https://www.genecards.org/cgi-bin/carddisp.pl?gene=E2F2</a>     |
| PRKDC  | Protein Kinase, DNA-Activated, Catalytic Subunit      | Protein Coding | 48 | GC08M047773 | 2.745072 | <a href="https://www.genecards.org/cgi-bin/carddisp.pl?gene=PRKDC">https://www.genecards.org/cgi-bin/carddisp.pl?gene=PRKDC</a>   |
| BATF   | Basic Leucine Zipper ATF-Like Transcription Factor    | Protein Coding | 40 | GC14P075523 | 2.737839 | <a href="https://www.genecards.org/cgi-bin/carddisp.pl?gene=BATF">https://www.genecards.org/cgi-bin/carddisp.pl?gene=BATF</a>     |
| GGT6   | Gamma-Glutamyltransferase 6                           | Protein Coding | 34 | GC17M004559 | 2.735911 | <a href="https://www.genecards.org/cgi-bin/carddisp.pl?gene=GGT6">https://www.genecards.org/cgi-bin/carddisp.pl?gene=GGT6</a>     |
| SMTNL2 | Smoothelin Like 2                                     | Protein Coding | 32 | GC17P004583 | 2.735911 | <a href="https://www.genecards.org/cgi-bin/carddisp.pl?gene=SMTNL2">https://www.genecards.org/cgi-bin/carddisp.pl?gene=SMTNL2</a> |
| SIRT4  | Sirtuin 4                                             | Protein Coding | 39 | GC12P120291 | 2.729069 | <a href="https://www.genecards.org/cgi-bin/carddisp.pl?gene=SIRT4">https://www.genecards.org/cgi-bin/carddisp.pl?gene=SIRT4</a>   |

|          |                                                                                       |                |    |             |          |                                                                                                                                       |
|----------|---------------------------------------------------------------------------------------|----------------|----|-------------|----------|---------------------------------------------------------------------------------------------------------------------------------------|
| IGES     | Immunoglobulin E Concentration, Serum                                                 | Genetic Locus  | 4  | GC05U990033 | 2.727148 | <a href="https://www.genecards.org/cgi-bin/carddisp.pl?gene=IGES">https://www.genecards.org/cgi-bin/carddisp.pl?gene=IGES</a>         |
| CYB5A    | Cytochrome B5 Type A                                                                  | Protein Coding | 42 | GC18M074250 | 2.726281 | <a href="https://www.genecards.org/cgi-bin/carddisp.pl?gene=CYB5A">https://www.genecards.org/cgi-bin/carddisp.pl?gene=CYB5A</a>       |
| OPTN     | Optineurin                                                                            | Protein Coding | 43 | GC10P013099 | 2.717163 | <a href="https://www.genecards.org/cgi-bin/carddisp.pl?gene=OPTN">https://www.genecards.org/cgi-bin/carddisp.pl?gene=OPTN</a>         |
| SERPINF2 | Serpin Family F Member 2                                                              | Protein Coding | 44 | GC17P001742 | 2.708069 | <a href="https://www.genecards.org/cgi-bin/carddisp.pl?gene=SERPINF2">https://www.genecards.org/cgi-bin/carddisp.pl?gene=SERPINF2</a> |
| ITGA1    | Integrin Subunit Alpha 1                                                              | Protein Coding | 42 | GC05P052788 | 2.707134 | <a href="https://www.genecards.org/cgi-bin/carddisp.pl?gene=ITGA1">https://www.genecards.org/cgi-bin/carddisp.pl?gene=ITGA1</a>       |
| HARS1    | Histidyl-TRNA Synthetase 1                                                            | Protein Coding | 34 | GC05M140673 | 2.701486 | <a href="https://www.genecards.org/cgi-bin/carddisp.pl?gene=HARS1">https://www.genecards.org/cgi-bin/carddisp.pl?gene=HARS1</a>       |
| GIN1     | Gypsy Retrotransposon Integrase 1                                                     | Protein Coding | 32 | GC05M103086 | 2.701116 | <a href="https://www.genecards.org/cgi-bin/carddisp.pl?gene=GIN1">https://www.genecards.org/cgi-bin/carddisp.pl?gene=GIN1</a>         |
| KIR2DS1  | Killer Cell Immunoglobulin Like Receptor, Two Ig Domains And Short Cytoplasmic Tail 1 | Protein Coding | 24 | GC19Mr00063 | 2.699276 | <a href="https://www.genecards.org/cgi-bin/carddisp.pl?gene=KIR2DS1">https://www.genecards.org/cgi-bin/carddisp.pl?gene=KIR2DS1</a>   |
| XIST     | X Inactive Specific Transcript                                                        | RNA Gene       | 25 | GC0XM073820 | 2.692909 | <a href="https://www.genecards.org/cgi-bin/carddisp.pl?gene=XIST">https://www.genecards.org/cgi-bin/carddisp.pl?gene=XIST</a>         |
| RPLP1    | Ribosomal Protein Lateral Stalk Subunit P1                                            | Protein Coding | 38 | GC15P117548 | 2.692557 | <a href="https://www.genecards.org/cgi-bin/carddisp.pl?gene=RPLP1">https://www.genecards.org/cgi-bin/carddisp.pl?gene=RPLP1</a>       |
| VPS37C   | VPS37C Subunit Of ESCRT-I                                                             | Protein Coding | 34 | GC11M061130 | 2.692076 | <a href="https://www.genecards.org/cgi-bin/carddisp.pl?gene=VPS37C">https://www.genecards.org/cgi-bin/carddisp.pl?gene=VPS37C</a>     |
| SMIM21   | Small Integral Membrane Protein 21                                                    | Protein Coding | 26 | GC18M075409 | 2.692076 | <a href="https://www.genecards.org/cgi-bin/carddisp.pl?gene=SMIM21">https://www.genecards.org/cgi-bin/carddisp.pl?gene=SMIM21</a>     |
| EPHB1    | EPH Receptor B1                                                                       | Protein Coding | 45 | GC03P134795 | 2.691434 | <a href="https://www.genecards.org/cgi-bin/carddisp.pl?gene=EPHB1">https://www.genecards.org/cgi-bin/carddisp.pl?gene=EPHB1</a>       |

|         |                                                  |                |    |             |          |                                                                                                                                     |
|---------|--------------------------------------------------|----------------|----|-------------|----------|-------------------------------------------------------------------------------------------------------------------------------------|
| EOMES   | Eomesodermin                                     | Protein Coding | 42 | GC03M027715 | 2.686572 | <a href="https://www.genecards.org/cgi-bin/carddisp.pl?gene=EOMES">https://www.genecards.org/cgi-bin/carddisp.pl?gene=EOMES</a>     |
| OLR1    | Oxidized Low Density Lipoprotein Receptor 1      | Protein Coding | 41 | GC12M021106 | 2.685989 | <a href="https://www.genecards.org/cgi-bin/carddisp.pl?gene=OLR1">https://www.genecards.org/cgi-bin/carddisp.pl?gene=OLR1</a>       |
| RAC2    | Rac Family Small GTPase 2                        | Protein Coding | 49 | GC22M057489 | 2.681681 | <a href="https://www.genecards.org/cgi-bin/carddisp.pl?gene=RAC2">https://www.genecards.org/cgi-bin/carddisp.pl?gene=RAC2</a>       |
| RAMP2   | Receptor Activity Modifying Protein 2            | Protein Coding | 41 | GC17P042758 | 2.677371 | <a href="https://www.genecards.org/cgi-bin/carddisp.pl?gene=RAMP2">https://www.genecards.org/cgi-bin/carddisp.pl?gene=RAMP2</a>     |
| HSD11B2 | Hydroxysteroid 11-Beta Dehydrogenase 2           | Protein Coding | 45 | GC16P067433 | 2.675774 | <a href="https://www.genecards.org/cgi-bin/carddisp.pl?gene=HSD11B2">https://www.genecards.org/cgi-bin/carddisp.pl?gene=HSD11B2</a> |
| CHD7    | Chromodomain Helicase DNA Binding Protein 7      | Protein Coding | 44 | GC08P060678 | 2.674856 | <a href="https://www.genecards.org/cgi-bin/carddisp.pl?gene=CHD7">https://www.genecards.org/cgi-bin/carddisp.pl?gene=CHD7</a>       |
| HBEGF   | Heparin Binding EGF Like Growth Factor           | Protein Coding | 41 | GC05M140332 | 2.668864 | <a href="https://www.genecards.org/cgi-bin/carddisp.pl?gene=HBEGF">https://www.genecards.org/cgi-bin/carddisp.pl?gene=HBEGF</a>     |
| ENTPD1  | Ectonucleoside Triphosphate Diphosphohydrolase 1 | Protein Coding | 46 | GC10P095711 | 2.668351 | <a href="https://www.genecards.org/cgi-bin/carddisp.pl?gene=ENTPD1">https://www.genecards.org/cgi-bin/carddisp.pl?gene=ENTPD1</a>   |
| BMX     | BMX Non-Receptor Tyrosine Kinase                 | Protein Coding | 44 | GC0XP015392 | 2.667382 | <a href="https://www.genecards.org/cgi-bin/carddisp.pl?gene=BMX">https://www.genecards.org/cgi-bin/carddisp.pl?gene=BMX</a>         |
| MIR451A | MicroRNA 451a                                    | RNA Gene       | 19 | GC17M028861 | 2.665875 | <a href="https://www.genecards.org/cgi-bin/carddisp.pl?gene=MIR451A">https://www.genecards.org/cgi-bin/carddisp.pl?gene=MIR451A</a> |
| MALT1   | MALT1 Paracaspase                                | Protein Coding | 45 | GC18P058671 | 2.664839 | <a href="https://www.genecards.org/cgi-bin/carddisp.pl?gene=MALT1">https://www.genecards.org/cgi-bin/carddisp.pl?gene=MALT1</a>     |
| C1QC    | Complement C1q C Chain                           | Protein Coding | 44 | GC01P022643 | 2.663178 | <a href="https://www.genecards.org/cgi-bin/carddisp.pl?gene=C1QC">https://www.genecards.org/cgi-bin/carddisp.pl?gene=C1QC</a>       |
| C1QB    | Complement C1q B Chain                           | Protein Coding | 43 | GC01P022652 | 2.663178 | <a href="https://www.genecards.org/cgi-bin/carddisp.pl?gene=C1QB">https://www.genecards.org/cgi-bin/carddisp.pl?gene=C1QB</a>       |

|        |                                                     |                |    |             |          |                                                                                                                                   |
|--------|-----------------------------------------------------|----------------|----|-------------|----------|-----------------------------------------------------------------------------------------------------------------------------------|
| HSPA1A | Heat Shock Protein Family A (Hsp70) Member 1A       | Protein Coding | 44 | GC06P083713 | 2.660803 | <a href="https://www.genecards.org/cgi-bin/carddisp.pl?gene=HSPA1A">https://www.genecards.org/cgi-bin/carddisp.pl?gene=HSPA1A</a> |
| FLI1   | Fli-1 Proto-Oncogene, ETS Transcription Factor      | Protein Coding | 46 | GC11P128686 | 2.660119 | <a href="https://www.genecards.org/cgi-bin/carddisp.pl?gene=FLI1">https://www.genecards.org/cgi-bin/carddisp.pl?gene=FLI1</a>     |
| JDP2   | Jun Dimerization Protein 2                          | Protein Coding | 39 | GC14P075427 | 2.660119 | <a href="https://www.genecards.org/cgi-bin/carddisp.pl?gene=JDP2">https://www.genecards.org/cgi-bin/carddisp.pl?gene=JDP2</a>     |
| CCL23  | C-C Motif Chemokine Ligand 23                       | Protein Coding | 33 | GC17M036013 | 2.658659 | <a href="https://www.genecards.org/cgi-bin/carddisp.pl?gene=CCL23">https://www.genecards.org/cgi-bin/carddisp.pl?gene=CCL23</a>   |
| FABP4  | Fatty Acid Binding Protein 4                        | Protein Coding | 43 | GC08M081478 | 2.658094 | <a href="https://www.genecards.org/cgi-bin/carddisp.pl?gene=FABP4">https://www.genecards.org/cgi-bin/carddisp.pl?gene=FABP4</a>   |
| CLEC4A | C-Type Lectin Domain Family 4 Member A              | Protein Coding | 37 | GC12P021118 | 2.65647  | <a href="https://www.genecards.org/cgi-bin/carddisp.pl?gene=CLEC4A">https://www.genecards.org/cgi-bin/carddisp.pl?gene=CLEC4A</a> |
| FADS2  | Fatty Acid Desaturase 2                             | Protein Coding | 43 | GC11P061792 | 2.655647 | <a href="https://www.genecards.org/cgi-bin/carddisp.pl?gene=FADS2">https://www.genecards.org/cgi-bin/carddisp.pl?gene=FADS2</a>   |
| CD46   | CD46 Molecule                                       | Protein Coding | 45 | GC01P207752 | 2.653578 | <a href="https://www.genecards.org/cgi-bin/carddisp.pl?gene=CD46">https://www.genecards.org/cgi-bin/carddisp.pl?gene=CD46</a>     |
| HPX    | Hemopexin                                           | Protein Coding | 40 | GC11M006578 | 2.652345 | <a href="https://www.genecards.org/cgi-bin/carddisp.pl?gene=HPX">https://www.genecards.org/cgi-bin/carddisp.pl?gene=HPX</a>       |
| CDKAL1 | CDK5 Regulatory Subunit Associated Protein 1 Like 1 | Protein Coding | 38 | GC06P020534 | 2.650796 | <a href="https://www.genecards.org/cgi-bin/carddisp.pl?gene=CDKAL1">https://www.genecards.org/cgi-bin/carddisp.pl?gene=CDKAL1</a> |
| PDLIM4 | PDZ And LIM Domain 4                                | Protein Coding | 39 | GC05P132257 | 2.64983  | <a href="https://www.genecards.org/cgi-bin/carddisp.pl?gene=PDLIM4">https://www.genecards.org/cgi-bin/carddisp.pl?gene=PDLIM4</a> |
| MAP3K5 | Mitogen-Activated Protein Kinase Kinase Kinase 5    | Protein Coding | 45 | GC06M136557 | 2.6483   | <a href="https://www.genecards.org/cgi-bin/carddisp.pl?gene=MAP3K5">https://www.genecards.org/cgi-bin/carddisp.pl?gene=MAP3K5</a> |
| FAAH   | Fatty Acid Amide Hydrolase                          | Protein Coding | 46 | GC01P046394 | 2.647988 | <a href="https://www.genecards.org/cgi-bin/carddisp.pl?gene=FAAH">https://www.genecards.org/cgi-bin/carddisp.pl?gene=FAAH</a>     |

|           |                                                            |                |    |             |          |                                                                                                                                         |
|-----------|------------------------------------------------------------|----------------|----|-------------|----------|-----------------------------------------------------------------------------------------------------------------------------------------|
| TPR       | Translocated Promoter Region, Nuclear Basket Protein       | Protein Coding | 42 | GC01M186319 | 2.644225 | <a href="https://www.genecards.org/cgi-bin/carddisp.pl?gene=TPR">https://www.genecards.org/cgi-bin/carddisp.pl?gene=TPR</a>             |
| WARS1     | Tryptophanyl-TRNA Synthetase 1                             | Protein Coding | 36 | GC14M101280 | 2.642249 | <a href="https://www.genecards.org/cgi-bin/carddisp.pl?gene=WARS1">https://www.genecards.org/cgi-bin/carddisp.pl?gene=WARS1</a>         |
| CDSN      | Corneodesmosin                                             | Protein Coding | 41 | GC06M031115 | 2.635215 | <a href="https://www.genecards.org/cgi-bin/carddisp.pl?gene=CDSN">https://www.genecards.org/cgi-bin/carddisp.pl?gene=CDSN</a>           |
| VPREB1    | V-Set Pre-B Cell Surrogate Light Chain 1                   | Protein Coding | 38 | GC22P022244 | 2.633273 | <a href="https://www.genecards.org/cgi-bin/carddisp.pl?gene=VPREB1">https://www.genecards.org/cgi-bin/carddisp.pl?gene=VPREB1</a>       |
| COL3A1    | Collagen Type III Alpha 1 Chain                            | Protein Coding | 45 | GC02P188974 | 2.632158 | <a href="https://www.genecards.org/cgi-bin/carddisp.pl?gene=COL3A1">https://www.genecards.org/cgi-bin/carddisp.pl?gene=COL3A1</a>       |
| CDKN2A    | Cyclin Dependent Kinase Inhibitor 2A                       | Protein Coding | 48 | GC09M021967 | 2.632003 | <a href="https://www.genecards.org/cgi-bin/carddisp.pl?gene=CDKN2A">https://www.genecards.org/cgi-bin/carddisp.pl?gene=CDKN2A</a>       |
| MTNR1A    | Melatonin Receptor 1A                                      | Protein Coding | 41 | GC04M186533 | 2.6285   | <a href="https://www.genecards.org/cgi-bin/carddisp.pl?gene=MTNR1A">https://www.genecards.org/cgi-bin/carddisp.pl?gene=MTNR1A</a>       |
| RNF182    | Ring Finger Protein 182                                    | Protein Coding | 36 | GC06P013924 | 2.625268 | <a href="https://www.genecards.org/cgi-bin/carddisp.pl?gene=RNF182">https://www.genecards.org/cgi-bin/carddisp.pl?gene=RNF182</a>       |
| GABARAPL3 | GABA Type A Receptor Associated Protein Like 3 Pseudogene  | Pseudo gene    | 20 | GC15M090346 | 2.625268 | <a href="https://www.genecards.org/cgi-bin/carddisp.pl?gene=GABARAPL3">https://www.genecards.org/cgi-bin/carddisp.pl?gene=GABARAPL3</a> |
| PDE3A     | Phosphodiesterase 3A                                       | Protein Coding | 48 | GC12P021516 | 2.625078 | <a href="https://www.genecards.org/cgi-bin/carddisp.pl?gene=PDE3A">https://www.genecards.org/cgi-bin/carddisp.pl?gene=PDE3A</a>         |
| SLCO1C1   | Solute Carrier Organic Anion Transporter Family Member 1C1 | Protein Coding | 38 | GC12P020695 | 2.625078 | <a href="https://www.genecards.org/cgi-bin/carddisp.pl?gene=SLCO1C1">https://www.genecards.org/cgi-bin/carddisp.pl?gene=SLCO1C1</a>     |
| FTL       | Ferritin Light Chain                                       | Protein Coding | 45 | GC19P048965 | 2.623077 | <a href="https://www.genecards.org/cgi-bin/carddisp.pl?gene=FTL">https://www.genecards.org/cgi-bin/carddisp.pl?gene=FTL</a>             |
| HLA-DRB3  | Major Histocompatibility Complex, Class II, DR Beta 3      | Protein Coding | 29 | GC06Mn03715 | 2.621905 | <a href="https://www.genecards.org/cgi-bin/carddisp.pl?gene=HLA-DRB3">https://www.genecards.org/cgi-bin/carddisp.pl?gene=HLA-DRB3</a>   |
| CGAS      | Cyclic GMP-AMP Synthase                                    | Protein Coding | 29 | GC06M073414 | 2.619544 | <a href="https://www.genecards.org/cgi-">https://www.genecards.org/cgi-</a>                                                             |



|          |                                                       |                |    |             |          |                                                                                                                                       |
|----------|-------------------------------------------------------|----------------|----|-------------|----------|---------------------------------------------------------------------------------------------------------------------------------------|
| S100A1   | S100 Calcium Binding Protein A1                       | Protein Coding | 40 | GC01P153627 | 2.59816  | <a href="https://www.genecards.org/cgi-bin/carddisp.pl?gene=S100A1">https://www.genecards.org/cgi-bin/carddisp.pl?gene=S100A1</a>     |
| TPSAB1   | Tryptase Alpha/Beta 1                                 | Protein Coding | 43 | GC16P001240 | 2.598006 | <a href="https://www.genecards.org/cgi-bin/carddisp.pl?gene=TPSAB1">https://www.genecards.org/cgi-bin/carddisp.pl?gene=TPSAB1</a>     |
| MIR141   | MicroRNA 141                                          | RNA Gene       | 22 | GC12P021095 | 2.593911 | <a href="https://www.genecards.org/cgi-bin/carddisp.pl?gene=MIR141">https://www.genecards.org/cgi-bin/carddisp.pl?gene=MIR141</a>     |
| ACTR2    | Actin Related Protein 2                               | Protein Coding | 42 | GC02P065227 | 2.593283 | <a href="https://www.genecards.org/cgi-bin/carddisp.pl?gene=ACTR2">https://www.genecards.org/cgi-bin/carddisp.pl?gene=ACTR2</a>       |
| KCNIP4   | Potassium Voltage-Gated Channel Interacting Protein 4 | Protein Coding | 38 | GC04M020728 | 2.582652 | <a href="https://www.genecards.org/cgi-bin/carddisp.pl?gene=KCNIP4">https://www.genecards.org/cgi-bin/carddisp.pl?gene=KCNIP4</a>     |
| LRP1     | LDL Receptor Related Protein 1                        | Protein Coding | 46 | GC12P057128 | 2.5737   | <a href="https://www.genecards.org/cgi-bin/carddisp.pl?gene=LRP1">https://www.genecards.org/cgi-bin/carddisp.pl?gene=LRP1</a>         |
| NRM      | Nurim                                                 | Protein Coding | 33 | GC06M065880 | 2.569693 | <a href="https://www.genecards.org/cgi-bin/carddisp.pl?gene=NRM">https://www.genecards.org/cgi-bin/carddisp.pl?gene=NRM</a>           |
| CASTOR1  | Cytosolic Arginine Sensor For MTORC1 Subunit 1        | Protein Coding | 23 | GC22M057166 | 2.567595 | <a href="https://www.genecards.org/cgi-bin/carddisp.pl?gene=CASTOR1">https://www.genecards.org/cgi-bin/carddisp.pl?gene=CASTOR1</a>   |
| SIRT6    | Sirtuin 6                                             | Protein Coding | 43 | GC19M004174 | 2.565393 | <a href="https://www.genecards.org/cgi-bin/carddisp.pl?gene=SIRT6">https://www.genecards.org/cgi-bin/carddisp.pl?gene=SIRT6</a>       |
| CNTF     | Ciliary Neurotrophic Factor                           | Protein Coding | 39 | GC11P058622 | 2.56464  | <a href="https://www.genecards.org/cgi-bin/carddisp.pl?gene=CNTF">https://www.genecards.org/cgi-bin/carddisp.pl?gene=CNTF</a>         |
| MIR210   | MicroRNA 210                                          | RNA Gene       | 21 | GC11M003193 | 2.556592 | <a href="https://www.genecards.org/cgi-bin/carddisp.pl?gene=MIR210">https://www.genecards.org/cgi-bin/carddisp.pl?gene=MIR210</a>     |
| TANK     | TRAF Family Member Associated NFKB Activator          | Protein Coding | 41 | GC02P161136 | 2.555561 | <a href="https://www.genecards.org/cgi-bin/carddisp.pl?gene=TANK">https://www.genecards.org/cgi-bin/carddisp.pl?gene=TANK</a>         |
| MIR129-1 | MicroRNA 129-1                                        | RNA Gene       | 18 | GC07P128207 | 2.552329 | <a href="https://www.genecards.org/cgi-bin/carddisp.pl?gene=MIR129-1">https://www.genecards.org/cgi-bin/carddisp.pl?gene=MIR129-1</a> |
| SMO      | Smoothened, Frizzled Class Receptor                   | Protein Coding | 47 | GC07P131934 | 2.549778 | <a href="https://www.genecards.org/cgi-">https://www.genecards.org/cgi-</a>                                                           |



|           |                                               |                |    |             |          |                                                                                                                                                |
|-----------|-----------------------------------------------|----------------|----|-------------|----------|------------------------------------------------------------------------------------------------------------------------------------------------|
|           |                                               |                |    |             |          | <a href="http://www.ncbi.nlm.nih.gov/ncbi/cdd/bin/carddisp.pl?gene=SMO">bin/carddisp.pl?gene=SMO</a>                                           |
| CTHRC1    | Collagen Triple Helix Repeat Containing 1     | Protein Coding | 40 | GC08P103371 | 2.548314 | <a href="http://www.ncbi.nlm.nih.gov/ncbi/cdd/bin/carddisp.pl?gene=CTHRC1">https://www.genecards.org/cgi-bin/carddisp.pl?gene=CTHRC1</a>       |
| ABCA1     | ATP Binding Cassette Subfamily A Member 1     | Protein Coding | 46 | GC09M104781 | 2.548271 | <a href="http://www.ncbi.nlm.nih.gov/ncbi/cdd/bin/carddisp.pl?gene=ABCA1">https://www.genecards.org/cgi-bin/carddisp.pl?gene=ABCA1</a>         |
| PTPRT     | Protein Tyrosine Phosphatase Receptor Type T  | Protein Coding | 43 | GC20M042072 | 2.544767 | <a href="http://www.ncbi.nlm.nih.gov/ncbi/cdd/bin/carddisp.pl?gene=PTPRT">https://www.genecards.org/cgi-bin/carddisp.pl?gene=PTPRT</a>         |
| MERTK     | MER Proto-Oncogene, Tyrosine Kinase           | Protein Coding | 49 | GC02P111898 | 2.538073 | <a href="http://www.ncbi.nlm.nih.gov/ncbi/cdd/bin/carddisp.pl?gene=MERTK">https://www.genecards.org/cgi-bin/carddisp.pl?gene=MERTK</a>         |
| TACR2     | Tachykinin Receptor 2                         | Protein Coding | 41 | GC10M069403 | 2.537549 | <a href="http://www.ncbi.nlm.nih.gov/ncbi/cdd/bin/carddisp.pl?gene=TACR2">https://www.genecards.org/cgi-bin/carddisp.pl?gene=TACR2</a>         |
| LSP1      | Lymphocyte Specific Protein 1                 | Protein Coding | 40 | GC11P001878 | 2.530858 | <a href="http://www.ncbi.nlm.nih.gov/ncbi/cdd/bin/carddisp.pl?gene=LSP1">https://www.genecards.org/cgi-bin/carddisp.pl?gene=LSP1</a>           |
| ZNRD2     | Zinc Ribbon Domain Containing 2               | Protein Coding | 28 | GC11P069991 | 2.530775 | <a href="http://www.ncbi.nlm.nih.gov/ncbi/cdd/bin/carddisp.pl?gene=ZNRD2">https://www.genecards.org/cgi-bin/carddisp.pl?gene=ZNRD2</a>         |
| LINC00426 | Long Intergenic Non-Protein Coding RNA 426    | RNA Gene       | 16 | GC13M030377 | 2.530775 | <a href="http://www.ncbi.nlm.nih.gov/ncbi/cdd/bin/carddisp.pl?gene=LINC00426">https://www.genecards.org/cgi-bin/carddisp.pl?gene=LINC00426</a> |
| CXCR2P1   | C-X-C Motif Chemokine Receptor 2 Pseudogene 1 | Pseudo gene    | 14 | GC02M218059 | 2.530775 | <a href="http://www.ncbi.nlm.nih.gov/ncbi/cdd/bin/carddisp.pl?gene=CXCR2P1">https://www.genecards.org/cgi-bin/carddisp.pl?gene=CXCR2P1</a>     |
| LINC02384 | Long Intergenic Non-Protein Coding RNA 2384   | RNA Gene       | 13 | GC12M068334 | 2.530775 | <a href="http://www.ncbi.nlm.nih.gov/ncbi/cdd/bin/carddisp.pl?gene=LINC02384">https://www.genecards.org/cgi-bin/carddisp.pl?gene=LINC02384</a> |
| CD160     | CD160 Molecule                                | Protein Coding | 38 | GC01P145719 | 2.527282 | <a href="http://www.ncbi.nlm.nih.gov/ncbi/cdd/bin/carddisp.pl?gene=CD160">https://www.genecards.org/cgi-bin/carddisp.pl?gene=CD160</a>         |
| TYROBP    | Transmembrane Immune Signaling Adaptor TYROBP | Protein Coding | 42 | GC19M035904 | 2.523565 | <a href="http://www.ncbi.nlm.nih.gov/ncbi/cdd/bin/carddisp.pl?gene=TYROBP">https://www.genecards.org/cgi-bin/carddisp.pl?gene=TYROBP</a>       |
| VSIG4     | V-Set And Immunoglobulin Domain Containing 4  | Protein Coding | 36 | GC0XM066021 | 2.520731 | <a href="http://www.ncbi.nlm.nih.gov/ncbi/cdd/bin/carddisp.pl?gene=VSIG4">https://www.genecards.org/cgi-bin/carddisp.pl?gene=VSIG4</a>         |

|           |                                               |                |    |             |          |                                                                                                                                         |
|-----------|-----------------------------------------------|----------------|----|-------------|----------|-----------------------------------------------------------------------------------------------------------------------------------------|
| ADIPOR1   | Adiponectin Receptor 1                        | Protein Coding | 43 | GC01M202940 | 2.518602 | <a href="https://www.genecards.org/cgi-bin/carddisp.pl?gene=ADIPOR1">https://www.genecards.org/cgi-bin/carddisp.pl?gene=ADIPOR1</a>     |
| MIR214    | MicroRNA 214                                  | RNA Gene       | 22 | GC01M172234 | 2.517413 | <a href="https://www.genecards.org/cgi-bin/carddisp.pl?gene=MIR214">https://www.genecards.org/cgi-bin/carddisp.pl?gene=MIR214</a>       |
| RDX       | Radixin                                       | Protein Coding | 46 | GC11M109864 | 2.515399 | <a href="https://www.genecards.org/cgi-bin/carddisp.pl?gene=RDX">https://www.genecards.org/cgi-bin/carddisp.pl?gene=RDX</a>             |
| TNFRSF10C | TNF Receptor Superfamily Member 10c           | Protein Coding | 37 | GC08P023102 | 2.511104 | <a href="https://www.genecards.org/cgi-bin/carddisp.pl?gene=TNFRSF10C">https://www.genecards.org/cgi-bin/carddisp.pl?gene=TNFRSF10C</a> |
| GMCL2     | Germ Cell-Less 2, Spermatogenesis Associated  | Protein Coding | 19 | GC05M178189 | 2.509099 | <a href="https://www.genecards.org/cgi-bin/carddisp.pl?gene=GMCL2">https://www.genecards.org/cgi-bin/carddisp.pl?gene=GMCL2</a>         |
| MIR346    | MicroRNA 346                                  | RNA Gene       | 21 | GC10M086264 | 2.506927 | <a href="https://www.genecards.org/cgi-bin/carddisp.pl?gene=MIR346">https://www.genecards.org/cgi-bin/carddisp.pl?gene=MIR346</a>       |
| LILRA3    | Leukocyte Immunoglobulin Like Receptor A3     | Protein Coding | 31 | GC19Mp00270 | 2.505285 | <a href="https://www.genecards.org/cgi-bin/carddisp.pl?gene=LILRA3">https://www.genecards.org/cgi-bin/carddisp.pl?gene=LILRA3</a>       |
| S1PR1     | Sphingosine-1-Phosphate Receptor 1            | Protein Coding | 42 | GC01P101236 | 2.504356 | <a href="https://www.genecards.org/cgi-bin/carddisp.pl?gene=S1PR1">https://www.genecards.org/cgi-bin/carddisp.pl?gene=S1PR1</a>         |
| PGK1      | Phosphoglycerate Kinase 1                     | Protein Coding | 47 | GC0XP077994 | 2.502916 | <a href="https://www.genecards.org/cgi-bin/carddisp.pl?gene=PGK1">https://www.genecards.org/cgi-bin/carddisp.pl?gene=PGK1</a>           |
| GLI3      | GLI Family Zinc Finger 3                      | Protein Coding | 46 | GC07M041960 | 2.501774 | <a href="https://www.genecards.org/cgi-bin/carddisp.pl?gene=GLI3">https://www.genecards.org/cgi-bin/carddisp.pl?gene=GLI3</a>           |
| GAPDH     | Glyceraldehyde-3-Phosphate Dehydrogenase      | Protein Coding | 47 | GC12P021056 | 2.501425 | <a href="https://www.genecards.org/cgi-bin/carddisp.pl?gene=GAPDH">https://www.genecards.org/cgi-bin/carddisp.pl?gene=GAPDH</a>         |
| FOSL1     | FOS Like 1, AP-1 Transcription Factor Subunit | Protein Coding | 43 | GC11M089830 | 2.501411 | <a href="https://www.genecards.org/cgi-bin/carddisp.pl?gene=FOSL1">https://www.genecards.org/cgi-bin/carddisp.pl?gene=FOSL1</a>         |
| SIL1      | SIL1 Nucleotide Exchange Factor               | Protein Coding | 40 | GC05M138957 | 2.498796 | <a href="https://www.genecards.org/cgi-bin/carddisp.pl?gene=SIL1">https://www.genecards.org/cgi-bin/carddisp.pl?gene=SIL1</a>           |
| POU2F1    | POU Class 2 Homeobox 1                        | Protein Coding | 42 | GC01P167190 | 2.49787  | <a href="https://www.genecards.org/cgi-">https://www.genecards.org/cgi-</a>                                                             |

|          |                                                             |                |    |             |          |                                                                                                                                              |
|----------|-------------------------------------------------------------|----------------|----|-------------|----------|----------------------------------------------------------------------------------------------------------------------------------------------|
|          |                                                             |                |    |             |          | <a href="http://www.ncbi.nlm.nih.gov/ncbi/cdd/bin/carddisp.pl?gene=POU2F1">bin/carddisp.pl?gene=POU2F1</a>                                   |
| KRT18P39 | Keratin 18 Pseudogene 39                                    | Pseudo gene    | 9  | GC02M203765 | 2.49787  | <a href="http://www.ncbi.nlm.nih.gov/ncbi/cdd/bin/carddisp.pl?gene=KRT18P39">https://www.genecards.org/cgi-bin/carddisp.pl?gene=KRT18P39</a> |
| PSMG2    | Proteasome Assembly Chaperone 2                             | Protein Coding | 37 | GC18P017449 | 2.496347 | <a href="http://www.ncbi.nlm.nih.gov/ncbi/cdd/bin/carddisp.pl?gene=PSMG2">https://www.genecards.org/cgi-bin/carddisp.pl?gene=PSMG2</a>       |
| TNFSF8   | TNF Superfamily Member 8                                    | Protein Coding | 36 | GC09M114893 | 2.495427 | <a href="http://www.ncbi.nlm.nih.gov/ncbi/cdd/bin/carddisp.pl?gene=TNFSF8">https://www.genecards.org/cgi-bin/carddisp.pl?gene=TNFSF8</a>     |
| ITGB3    | Integrin Subunit Beta 3                                     | Protein Coding | 49 | GC17P055923 | 2.493982 | <a href="http://www.ncbi.nlm.nih.gov/ncbi/cdd/bin/carddisp.pl?gene=ITGB3">https://www.genecards.org/cgi-bin/carddisp.pl?gene=ITGB3</a>       |
| MIR518A1 | MicroRNA 518a-1                                             | RNA Gene       | 18 | GC19P067345 | 2.491659 | <a href="http://www.ncbi.nlm.nih.gov/ncbi/cdd/bin/carddisp.pl?gene=MIR518A1">https://www.genecards.org/cgi-bin/carddisp.pl?gene=MIR518A1</a> |
| RASGRP4  | RAS Guanyl Releasing Protein 4                              | Protein Coding | 36 | GC19M038409 | 2.490752 | <a href="http://www.ncbi.nlm.nih.gov/ncbi/cdd/bin/carddisp.pl?gene=RASGRP4">https://www.genecards.org/cgi-bin/carddisp.pl?gene=RASGRP4</a>   |
| VEGFD    | Vascular Endothelial Growth Factor D                        | Protein Coding | 32 | GC0XM015345 | 2.487922 | <a href="http://www.ncbi.nlm.nih.gov/ncbi/cdd/bin/carddisp.pl?gene=VEGFD">https://www.genecards.org/cgi-bin/carddisp.pl?gene=VEGFD</a>       |
| PTGER2   | Prostaglandin E Receptor 2                                  | Protein Coding | 46 | GC14P052314 | 2.478814 | <a href="http://www.ncbi.nlm.nih.gov/ncbi/cdd/bin/carddisp.pl?gene=PTGER2">https://www.genecards.org/cgi-bin/carddisp.pl?gene=PTGER2</a>     |
| KCNJ11   | Potassium Inwardly Rectifying Channel Subfamily J Member 11 | Protein Coding | 46 | GC11M017592 | 2.473814 | <a href="http://www.ncbi.nlm.nih.gov/ncbi/cdd/bin/carddisp.pl?gene=KCNJ11">https://www.genecards.org/cgi-bin/carddisp.pl?gene=KCNJ11</a>     |
| CYLD     | CYLD Lysine 63 Deubiquitinase                               | Protein Coding | 47 | GC16P050742 | 2.469159 | <a href="http://www.ncbi.nlm.nih.gov/ncbi/cdd/bin/carddisp.pl?gene=CYLD">https://www.genecards.org/cgi-bin/carddisp.pl?gene=CYLD</a>         |
| TMPO     | Thymopoietin                                                | Protein Coding | 44 | GC12P098515 | 2.466669 | <a href="http://www.ncbi.nlm.nih.gov/ncbi/cdd/bin/carddisp.pl?gene=TMPO">https://www.genecards.org/cgi-bin/carddisp.pl?gene=TMPO</a>         |
| HSPA1L   | Heat Shock Protein Family A (Hsp70) Member 1 Like           | Protein Coding | 44 | GC06M031809 | 2.465886 | <a href="http://www.ncbi.nlm.nih.gov/ncbi/cdd/bin/carddisp.pl?gene=HSPA1L">https://www.genecards.org/cgi-bin/carddisp.pl?gene=HSPA1L</a>     |
| WEE1     | WEE1 G2 Checkpoint Kinase                                   | Protein Coding | 45 | GC11P009573 | 2.461549 | <a href="http://www.ncbi.nlm.nih.gov/ncbi/cdd/bin/carddisp.pl?gene=WEE1">https://www.genecards.org/cgi-bin/carddisp.pl?gene=WEE1</a>         |

|        |                                                                     |                |    |             |          |                                                                                                                                   |
|--------|---------------------------------------------------------------------|----------------|----|-------------|----------|-----------------------------------------------------------------------------------------------------------------------------------|
| GPX1   | Glutathione Peroxidase 1                                            | Protein Coding | 45 | GC03M051185 | 2.459566 | <a href="https://www.genecards.org/cgi-bin/carddisp.pl?gene=GPX1">https://www.genecards.org/cgi-bin/carddisp.pl?gene=GPX1</a>     |
| PTPN3  | Protein Tyrosine Phosphatase Non-Receptor Type 3                    | Protein Coding | 44 | GC09M109375 | 2.457529 | <a href="https://www.genecards.org/cgi-bin/carddisp.pl?gene=PTPN3">https://www.genecards.org/cgi-bin/carddisp.pl?gene=PTPN3</a>   |
| TRG    | T Cell Receptor Gamma Locus                                         | Protein Coding | 13 | GC07M038240 | 2.456943 | <a href="https://www.genecards.org/cgi-bin/carddisp.pl?gene=TRG">https://www.genecards.org/cgi-bin/carddisp.pl?gene=TRG</a>       |
| RAP1A  | RAP1A, Member Of RAS Oncogene Family                                | Protein Coding | 43 | GC01P111542 | 2.454115 | <a href="https://www.genecards.org/cgi-bin/carddisp.pl?gene=RAP1A">https://www.genecards.org/cgi-bin/carddisp.pl?gene=RAP1A</a>   |
| NRP2   | Neuropilin 2                                                        | Protein Coding | 44 | GC02P205681 | 2.450089 | <a href="https://www.genecards.org/cgi-bin/carddisp.pl?gene=NRP2">https://www.genecards.org/cgi-bin/carddisp.pl?gene=NRP2</a>     |
| SEMA3F | Semaphorin 3F                                                       | Protein Coding | 41 | GC03P050360 | 2.450089 | <a href="https://www.genecards.org/cgi-bin/carddisp.pl?gene=SEMA3F">https://www.genecards.org/cgi-bin/carddisp.pl?gene=SEMA3F</a> |
| SPI1   | Spi-1 Proto-Oncogene                                                | Protein Coding | 42 | GC11M089364 | 2.447559 | <a href="https://www.genecards.org/cgi-bin/carddisp.pl?gene=SPI1">https://www.genecards.org/cgi-bin/carddisp.pl?gene=SPI1</a>     |
| ATP1A1 | ATPase Na <sup>+</sup> /K <sup>+</sup> Transporting Subunit Alpha 1 | Protein Coding | 48 | GC01P116372 | 2.441431 | <a href="https://www.genecards.org/cgi-bin/carddisp.pl?gene=ATP1A1">https://www.genecards.org/cgi-bin/carddisp.pl?gene=ATP1A1</a> |
| C1QBP  | Complement C1q Binding Protein                                      | Protein Coding | 43 | GC17M005432 | 2.441431 | <a href="https://www.genecards.org/cgi-bin/carddisp.pl?gene=C1QBP">https://www.genecards.org/cgi-bin/carddisp.pl?gene=C1QBP</a>   |
| MED1   | Mediator Complex Subunit 1                                          | Protein Coding | 40 | GC17M039404 | 2.441431 | <a href="https://www.genecards.org/cgi-bin/carddisp.pl?gene=MED1">https://www.genecards.org/cgi-bin/carddisp.pl?gene=MED1</a>     |
| AQP5   | Aquaporin 5                                                         | Protein Coding | 45 | GC12P049961 | 2.440441 | <a href="https://www.genecards.org/cgi-bin/carddisp.pl?gene=AQP5">https://www.genecards.org/cgi-bin/carddisp.pl?gene=AQP5</a>     |
| SSNA1  | SS Nuclear Autoantigen 1                                            | Protein Coding | 35 | GC09P137188 | 2.440441 | <a href="https://www.genecards.org/cgi-bin/carddisp.pl?gene=SSNA1">https://www.genecards.org/cgi-bin/carddisp.pl?gene=SSNA1</a>   |
| FGF23  | Fibroblast Growth Factor 23                                         | Protein Coding | 44 | GC12M004368 | 2.439505 | <a href="https://www.genecards.org/cgi-bin/carddisp.pl?gene=FGF23">https://www.genecards.org/cgi-bin/carddisp.pl?gene=FGF23</a>   |

|              |                                                           |                   |    |             |          |                                                                                                                                               |
|--------------|-----------------------------------------------------------|-------------------|----|-------------|----------|-----------------------------------------------------------------------------------------------------------------------------------------------|
| HLA-S        | Major Histocompatibility Complex, Class I, S (Pseudogene) | Pseudo gene       | 9  | GC06M031381 | 2.431741 | <a href="https://www.genecards.org/cgi-bin/carddisp.pl?gene=HLA-S">https://www.genecards.org/cgi-bin/carddisp.pl?gene=HLA-S</a>               |
| LOC111365141 | NOS2 5' Regulatory Region                                 | Biological Region | 3  | GC17P027800 | 2.429671 | <a href="https://www.genecards.org/cgi-bin/carddisp.pl?gene=LOC111365141">https://www.genecards.org/cgi-bin/carddisp.pl?gene=LOC111365141</a> |
| XCL1         | X-C Motif Chemokine Ligand 1                              | Protein Coding    | 35 | GC01P168576 | 2.429318 | <a href="https://www.genecards.org/cgi-bin/carddisp.pl?gene=XCL1">https://www.genecards.org/cgi-bin/carddisp.pl?gene=XCL1</a>                 |
| AQP1         | Aquaporin 1 (Colton Blood Group)                          | Protein Coding    | 45 | GC07P030911 | 2.423884 | <a href="https://www.genecards.org/cgi-bin/carddisp.pl?gene=AQP1">https://www.genecards.org/cgi-bin/carddisp.pl?gene=AQP1</a>                 |
| HSP90B1      | Heat Shock Protein 90 Beta Family Member 1                | Protein Coding    | 45 | GC12P103930 | 2.41881  | <a href="https://www.genecards.org/cgi-bin/carddisp.pl?gene=HSP90B1">https://www.genecards.org/cgi-bin/carddisp.pl?gene=HSP90B1</a>           |
| CYBA         | Cytochrome B-245 Alpha Chain                              | Protein Coding    | 46 | GC16M088643 | 2.417008 | <a href="https://www.genecards.org/cgi-bin/carddisp.pl?gene=CYBA">https://www.genecards.org/cgi-bin/carddisp.pl?gene=CYBA</a>                 |
| PPAT         | Phosphoribosyl Pyrophosphate Amidotransferase             | Protein Coding    | 43 | GC04M056393 | 2.416131 | <a href="https://www.genecards.org/cgi-bin/carddisp.pl?gene=PPAT">https://www.genecards.org/cgi-bin/carddisp.pl?gene=PPAT</a>                 |
| LTB4R2       | Leukotriene B4 Receptor 2                                 | Protein Coding    | 41 | GC14P032722 | 2.416099 | <a href="https://www.genecards.org/cgi-bin/carddisp.pl?gene=LTB4R2">https://www.genecards.org/cgi-bin/carddisp.pl?gene=LTB4R2</a>             |
| LY6G6E       | Lymphocyte Antigen 6 Family Member G6E                    | Pseudo gene       | 24 | GC06M065966 | 2.414783 | <a href="https://www.genecards.org/cgi-bin/carddisp.pl?gene=LY6G6E">https://www.genecards.org/cgi-bin/carddisp.pl?gene=LY6G6E</a>             |
| C1orf141     | Chromosome 1 Open Reading Frame 141                       | Protein Coding    | 28 | GC01M067092 | 2.414706 | <a href="https://www.genecards.org/cgi-bin/carddisp.pl?gene=C1orf141">https://www.genecards.org/cgi-bin/carddisp.pl?gene=C1orf141</a>         |
| PLAA         | Phospholipase A2 Activating Protein                       | Protein Coding    | 43 | GC09M026903 | 2.41254  | <a href="https://www.genecards.org/cgi-bin/carddisp.pl?gene=PLAA">https://www.genecards.org/cgi-bin/carddisp.pl?gene=PLAA</a>                 |
| BBC3         | BCL2 Binding Component 3                                  | Protein Coding    | 38 | GC19M047220 | 2.411876 | <a href="https://www.genecards.org/cgi-bin/carddisp.pl?gene=BBC3">https://www.genecards.org/cgi-bin/carddisp.pl?gene=BBC3</a>                 |
| SOX9         | SRY-Box Transcription Factor 9                            | Protein Coding    | 44 | GC17P072121 | 2.411608 | <a href="https://www.genecards.org/cgi-bin/carddisp.pl?gene=SOX9">https://www.genecards.org/cgi-bin/carddisp.pl?gene=SOX9</a>                 |
| OGG1         | 8-Oxoguanine DNA Glycosylase                              | Protein Coding    | 45 | GC03P012414 | 2.408346 | <a href="https://www.genecards.org/cgi-bin/carddisp.pl?gene=OGG1">https://www.genecards.org/cgi-bin/carddisp.pl?gene=OGG1</a>                 |

|         |                                            |                |    |             |          |                                                                                                                                     |
|---------|--------------------------------------------|----------------|----|-------------|----------|-------------------------------------------------------------------------------------------------------------------------------------|
|         |                                            |                |    |             |          | <a href="#">bin/carddisp.pl?gene=OGG1</a>                                                                                           |
| CUL1    | Cullin 1                                   | Protein Coding | 42 | GC07P148697 | 2.408346 | <a href="https://www.genecards.org/cgi-bin/carddisp.pl?gene=CUL1">https://www.genecards.org/cgi-bin/carddisp.pl?gene=CUL1</a>       |
| PRRT1   | Proline Rich Transmembrane Protein 1       | Protein Coding | 32 | GC06M065984 | 2.408346 | <a href="https://www.genecards.org/cgi-bin/carddisp.pl?gene=PRRT1">https://www.genecards.org/cgi-bin/carddisp.pl?gene=PRRT1</a>     |
| CTNNB1  | Catenin Beta 1                             | Protein Coding | 50 | GC03P041236 | 2.405236 | <a href="https://www.genecards.org/cgi-bin/carddisp.pl?gene=CTNNB1">https://www.genecards.org/cgi-bin/carddisp.pl?gene=CTNNB1</a>   |
| TGM2    | Transglutaminase 2                         | Protein Coding | 46 | GC20M038127 | 2.405123 | <a href="https://www.genecards.org/cgi-bin/carddisp.pl?gene=TGM2">https://www.genecards.org/cgi-bin/carddisp.pl?gene=TGM2</a>       |
| MIR18A  | MicroRNA 18a                               | RNA Gene       | 18 | GC13P091560 | 2.404482 | <a href="https://www.genecards.org/cgi-bin/carddisp.pl?gene=MIR18A">https://www.genecards.org/cgi-bin/carddisp.pl?gene=MIR18A</a>   |
| GRP     | Gastrin Releasing Peptide                  | Protein Coding | 39 | GC18P059220 | 2.402391 | <a href="https://www.genecards.org/cgi-bin/carddisp.pl?gene=GRP">https://www.genecards.org/cgi-bin/carddisp.pl?gene=GRP</a>         |
| SIRT3   | Sirtuin 3                                  | Protein Coding | 45 | GC11M000215 | 2.399146 | <a href="https://www.genecards.org/cgi-bin/carddisp.pl?gene=SIRT3">https://www.genecards.org/cgi-bin/carddisp.pl?gene=SIRT3</a>     |
| SPN     | Sialophorin                                | Protein Coding | 38 | GC16P029662 | 2.392903 | <a href="https://www.genecards.org/cgi-bin/carddisp.pl?gene=SPN">https://www.genecards.org/cgi-bin/carddisp.pl?gene=SPN</a>         |
| GSDMB   | Gasdermin B                                | Protein Coding | 36 | GC17M039904 | 2.392119 | <a href="https://www.genecards.org/cgi-bin/carddisp.pl?gene=GSDMB">https://www.genecards.org/cgi-bin/carddisp.pl?gene=GSDMB</a>     |
| C6orf47 | Chromosome 6 Open Reading Frame 47         | Protein Coding | 29 | GC06M065961 | 2.392119 | <a href="https://www.genecards.org/cgi-bin/carddisp.pl?gene=C6orf47">https://www.genecards.org/cgi-bin/carddisp.pl?gene=C6orf47</a> |
| HTRA2   | HtrA Serine Peptidase 2                    | Protein Coding | 44 | GC02P074529 | 2.389671 | <a href="https://www.genecards.org/cgi-bin/carddisp.pl?gene=HTRA2">https://www.genecards.org/cgi-bin/carddisp.pl?gene=HTRA2</a>     |
| CHGA    | Chromogranin A                             | Protein Coding | 43 | GC14P092944 | 2.38497  | <a href="https://www.genecards.org/cgi-bin/carddisp.pl?gene=CHGA">https://www.genecards.org/cgi-bin/carddisp.pl?gene=CHGA</a>       |
| ABCC11  | ATP Binding Cassette Subfamily C Member 11 | Protein Coding | 42 | GC16M048166 | 2.38497  | <a href="https://www.genecards.org/cgi-bin/carddisp.pl?gene=ABCC11">https://www.genecards.org/cgi-bin/carddisp.pl?gene=ABCC11</a>   |

|          |                                                     |                |    |             |          |                                                                                                                                       |
|----------|-----------------------------------------------------|----------------|----|-------------|----------|---------------------------------------------------------------------------------------------------------------------------------------|
| MSRA     | Methionine Sulfoxide Reductase A                    | Protein Coding | 41 | GC08P010054 | 2.38497  | <a href="https://www.genecards.org/cgi-bin/carddisp.pl?gene=MSRA">https://www.genecards.org/cgi-bin/carddisp.pl?gene=MSRA</a>         |
| MPG      | N-Methylpurine DNA Glycosylase                      | Protein Coding | 39 | GC16P011593 | 2.38497  | <a href="https://www.genecards.org/cgi-bin/carddisp.pl?gene=MPG">https://www.genecards.org/cgi-bin/carddisp.pl?gene=MPG</a>           |
| TIMD4    | T Cell Immunoglobulin And Mucin Domain Containing 4 | Protein Coding | 36 | GC05M156919 | 2.38497  | <a href="https://www.genecards.org/cgi-bin/carddisp.pl?gene=TIMD4">https://www.genecards.org/cgi-bin/carddisp.pl?gene=TIMD4</a>       |
| GSK3B    | Glycogen Synthase Kinase 3 Beta                     | Protein Coding | 47 | GC03M119821 | 2.380347 | <a href="https://www.genecards.org/cgi-bin/carddisp.pl?gene=GSK3B">https://www.genecards.org/cgi-bin/carddisp.pl?gene=GSK3B</a>       |
| DCAF5    | DDB1 And CUL4 Associated Factor 5                   | Protein Coding | 33 | GC14M069050 | 2.380035 | <a href="https://www.genecards.org/cgi-bin/carddisp.pl?gene=DCAF5">https://www.genecards.org/cgi-bin/carddisp.pl?gene=DCAF5</a>       |
| SLC46A1  | Solute Carrier Family 46 Member 1                   | Protein Coding | 41 | GC17M035136 | 2.379748 | <a href="https://www.genecards.org/cgi-bin/carddisp.pl?gene=SLC46A1">https://www.genecards.org/cgi-bin/carddisp.pl?gene=SLC46A1</a>   |
| MIR338   | MicroRNA 338                                        | RNA Gene       | 18 | GC17M081126 | 2.370824 | <a href="https://www.genecards.org/cgi-bin/carddisp.pl?gene=MIR338">https://www.genecards.org/cgi-bin/carddisp.pl?gene=MIR338</a>     |
| IL9R     | Interleukin 9 Receptor                              | Protein Coding | 35 | GC0XP155997 | 2.370452 | <a href="https://www.genecards.org/cgi-bin/carddisp.pl?gene=IL9R">https://www.genecards.org/cgi-bin/carddisp.pl?gene=IL9R</a>         |
| VCP      | Valosin Containing Protein                          | Protein Coding | 48 | GC09M035056 | 2.368829 | <a href="https://www.genecards.org/cgi-bin/carddisp.pl?gene=VCP">https://www.genecards.org/cgi-bin/carddisp.pl?gene=VCP</a>           |
| CTSD     | Cathepsin D                                         | Protein Coding | 50 | GC11M001752 | 2.368061 | <a href="https://www.genecards.org/cgi-bin/carddisp.pl?gene=CTSD">https://www.genecards.org/cgi-bin/carddisp.pl?gene=CTSD</a>         |
| GRM5     | Glutamate Metabotropic Receptor 5                   | Protein Coding | 46 | GC11M088504 | 2.367877 | <a href="https://www.genecards.org/cgi-bin/carddisp.pl?gene=GRM5">https://www.genecards.org/cgi-bin/carddisp.pl?gene=GRM5</a>         |
| DDX6     | DEAD-Box Helicase 6                                 | Protein Coding | 44 | GC11M118748 | 2.367877 | <a href="https://www.genecards.org/cgi-bin/carddisp.pl?gene=DDX6">https://www.genecards.org/cgi-bin/carddisp.pl?gene=DDX6</a>         |
| PTPRM    | Protein Tyrosine Phosphatase Receptor Type M        | Protein Coding | 43 | GC18P007557 | 2.367877 | <a href="https://www.genecards.org/cgi-bin/carddisp.pl?gene=PTPRM">https://www.genecards.org/cgi-bin/carddisp.pl?gene=PTPRM</a>       |
| CDK5RAP2 | CDK5 Regulatory Subunit Associated Protein 2        | Protein Coding | 41 | GC09M120388 | 2.367877 | <a href="https://www.genecards.org/cgi-bin/carddisp.pl?gene=CDK5RAP2">https://www.genecards.org/cgi-bin/carddisp.pl?gene=CDK5RAP2</a> |

|        |                                                                      |                |    |             |          |                                                                                                                                          |
|--------|----------------------------------------------------------------------|----------------|----|-------------|----------|------------------------------------------------------------------------------------------------------------------------------------------|
|        |                                                                      |                |    |             |          | <a href="http://www.ncbi.nlm.nih.gov/ncbi/cdd/bin/carddisp.pl?gene=CDK5RAP2">bin/carddisp.pl?gene=CDK5RAP2</a>                           |
| CEP57  | Centrosomal Protein 57                                               | Protein Coding | 41 | GC11P095789 | 2.367877 | <a href="http://www.ncbi.nlm.nih.gov/ncbi/cdd/bin/carddisp.pl?gene=CEP57">https://www.genecards.org/cgi-bin/carddisp.pl?gene=CEP57</a>   |
| STAG1  | Stromal Antigen 1                                                    | Protein Coding | 41 | GC03M136336 | 2.367877 | <a href="http://www.ncbi.nlm.nih.gov/ncbi/cdd/bin/carddisp.pl?gene=STAG1">https://www.genecards.org/cgi-bin/carddisp.pl?gene=STAG1</a>   |
| MTF1   | Metal Regulatory Transcription Factor 1                              | Protein Coding | 40 | GC01M037810 | 2.367877 | <a href="http://www.ncbi.nlm.nih.gov/ncbi/cdd/bin/carddisp.pl?gene=MTF1">https://www.genecards.org/cgi-bin/carddisp.pl?gene=MTF1</a>     |
| PTTG1  | PTTG1 Regulator Of Sister Chromatid Separation, Securin              | Protein Coding | 40 | GC05P160422 | 2.367877 | <a href="http://www.ncbi.nlm.nih.gov/ncbi/cdd/bin/carddisp.pl?gene=PTTG1">https://www.genecards.org/cgi-bin/carddisp.pl?gene=PTTG1</a>   |
| TPD52  | Tumor Protein D52                                                    | Protein Coding | 40 | GC08M080034 | 2.367877 | <a href="http://www.ncbi.nlm.nih.gov/ncbi/cdd/bin/carddisp.pl?gene=TPD52">https://www.genecards.org/cgi-bin/carddisp.pl?gene=TPD52</a>   |
| TREH   | Trehalase                                                            | Protein Coding | 40 | GC11M118657 | 2.367877 | <a href="http://www.ncbi.nlm.nih.gov/ncbi/cdd/bin/carddisp.pl?gene=TREH">https://www.genecards.org/cgi-bin/carddisp.pl?gene=TREH</a>     |
| GRHL2  | Grainyhead Like Transcription Factor 2                               | Protein Coding | 39 | GC08P101492 | 2.367877 | <a href="http://www.ncbi.nlm.nih.gov/ncbi/cdd/bin/carddisp.pl?gene=GRHL2">https://www.genecards.org/cgi-bin/carddisp.pl?gene=GRHL2</a>   |
| ABHD6  | Abhydrolase Domain Containing 6, Acylglycerol Lipase                 | Protein Coding | 38 | GC03P058238 | 2.367877 | <a href="http://www.ncbi.nlm.nih.gov/ncbi/cdd/bin/carddisp.pl?gene=ABHD6">https://www.genecards.org/cgi-bin/carddisp.pl?gene=ABHD6</a>   |
| RABEP1 | Rabaptin, RAB GTPase Binding Effector Protein 1                      | Protein Coding | 38 | GC17P005282 | 2.367877 | <a href="http://www.ncbi.nlm.nih.gov/ncbi/cdd/bin/carddisp.pl?gene=RABEP1">https://www.genecards.org/cgi-bin/carddisp.pl?gene=RABEP1</a> |
| CLYBL  | Citramalyl-CoA Lyase                                                 | Protein Coding | 37 | GC13P099606 | 2.367877 | <a href="http://www.ncbi.nlm.nih.gov/ncbi/cdd/bin/carddisp.pl?gene=CLYBL">https://www.genecards.org/cgi-bin/carddisp.pl?gene=CLYBL</a>   |
| FADS3  | Fatty Acid Desaturase 3                                              | Protein Coding | 36 | GC11M061873 | 2.367877 | <a href="http://www.ncbi.nlm.nih.gov/ncbi/cdd/bin/carddisp.pl?gene=FADS3">https://www.genecards.org/cgi-bin/carddisp.pl?gene=FADS3</a>   |
| PPIL4  | Peptidylprolyl Isomerase Like 4                                      | Protein Coding | 36 | GC06M149504 | 2.367877 | <a href="http://www.ncbi.nlm.nih.gov/ncbi/cdd/bin/carddisp.pl?gene=PPIL4">https://www.genecards.org/cgi-bin/carddisp.pl?gene=PPIL4</a>   |
| PPM1L  | Protein Phosphatase, Mg <sup>2+</sup> /Mn <sup>2+</sup> Dependent 1L | Protein Coding | 36 | GC03P160755 | 2.367877 | <a href="http://www.ncbi.nlm.nih.gov/ncbi/cdd/bin/carddisp.pl?gene=PPM1L">https://www.genecards.org/cgi-bin/carddisp.pl?gene=PPM1L</a>   |



|         |                                                         |                |    |             |          |                                                                                                                                     |
|---------|---------------------------------------------------------|----------------|----|-------------|----------|-------------------------------------------------------------------------------------------------------------------------------------|
| YPEL5   | Yippee Like 5                                           | Protein Coding | 36 | GC02P030108 | 2.367877 | <a href="https://www.genecards.org/cgi-bin/carddisp.pl?gene=YPEL5">https://www.genecards.org/cgi-bin/carddisp.pl?gene=YPEL5</a>     |
| CLNK    | Cytokine Dependent Hematopoietic Cell Linker            | Protein Coding | 35 | GC04M010491 | 2.367877 | <a href="https://www.genecards.org/cgi-bin/carddisp.pl?gene=CLNK">https://www.genecards.org/cgi-bin/carddisp.pl?gene=CLNK</a>       |
| FAM124A | Family With Sequence Similarity 124 Member A            | Protein Coding | 34 | GC13P051222 | 2.367877 | <a href="https://www.genecards.org/cgi-bin/carddisp.pl?gene=FAM124A">https://www.genecards.org/cgi-bin/carddisp.pl?gene=FAM124A</a> |
| RPP14   | Ribonuclease P/MRP Subunit P14                          | Protein Coding | 34 | GC03P058295 | 2.367877 | <a href="https://www.genecards.org/cgi-bin/carddisp.pl?gene=RPP14">https://www.genecards.org/cgi-bin/carddisp.pl?gene=RPP14</a>     |
| TXNDC11 | Thioredoxin Domain Containing 11                        | Protein Coding | 34 | GC16M011679 | 2.367877 | <a href="https://www.genecards.org/cgi-bin/carddisp.pl?gene=TXNDC11">https://www.genecards.org/cgi-bin/carddisp.pl?gene=TXNDC11</a> |
| DDA1    | DET1 And DDB1 Associated 1                              | Protein Coding | 33 | GC19P066218 | 2.367877 | <a href="https://www.genecards.org/cgi-bin/carddisp.pl?gene=DDA1">https://www.genecards.org/cgi-bin/carddisp.pl?gene=DDA1</a>       |
| ACOXL   | Acyl-CoA Oxidase Like                                   | Protein Coding | 32 | GC02P110732 | 2.367877 | <a href="https://www.genecards.org/cgi-bin/carddisp.pl?gene=ACOXL">https://www.genecards.org/cgi-bin/carddisp.pl?gene=ACOXL</a>     |
| AHNAK2  | AHNAK Nucleoprotein 2                                   | Protein Coding | 32 | GC14M104937 | 2.367877 | <a href="https://www.genecards.org/cgi-bin/carddisp.pl?gene=AHNAK2">https://www.genecards.org/cgi-bin/carddisp.pl?gene=AHNAK2</a>   |
| ANO8    | Anoctamin 8                                             | Protein Coding | 32 | GC19M017324 | 2.367877 | <a href="https://www.genecards.org/cgi-bin/carddisp.pl?gene=ANO8">https://www.genecards.org/cgi-bin/carddisp.pl?gene=ANO8</a>       |
| GUCY1B2 | Guanylate Cyclase 1 Soluble Subunit Beta 2 (Pseudogene) | Pseudo gene    | 31 | GC13M050994 | 2.367877 | <a href="https://www.genecards.org/cgi-bin/carddisp.pl?gene=GUCY1B2">https://www.genecards.org/cgi-bin/carddisp.pl?gene=GUCY1B2</a> |
| ARL14   | ADP Ribosylation Factor Like GTPase 14                  | Protein Coding | 30 | GC03P160677 | 2.367877 | <a href="https://www.genecards.org/cgi-bin/carddisp.pl?gene=ARL14">https://www.genecards.org/cgi-bin/carddisp.pl?gene=ARL14</a>     |
| ZNF438  | Zinc Finger Protein 438                                 | Protein Coding | 30 | GC10M030820 | 2.367877 | <a href="https://www.genecards.org/cgi-bin/carddisp.pl?gene=ZNF438">https://www.genecards.org/cgi-bin/carddisp.pl?gene=ZNF438</a>   |
| TMEM187 | Transmembrane Protein 187                               | Protein Coding | 28 | GC0XP153972 | 2.367877 | <a href="https://www.genecards.org/cgi-bin/carddisp.pl?gene=TMEM187">https://www.genecards.org/cgi-bin/carddisp.pl?gene=TMEM187</a> |

|              |                                                                       |                |    |              |           |                                                                                                                                               |
|--------------|-----------------------------------------------------------------------|----------------|----|--------------|-----------|-----------------------------------------------------------------------------------------------------------------------------------------------|
| FLACC1       | Flagellum Associated Containing Coiled-Coil Domains 1                 | Protein Coding | 26 | GC02M 201423 | 2.367 877 | <a href="https://www.genecards.org/cgi-bin/carddisp.pl?gene=FLACC1">https://www.genecards.org/cgi-bin/carddisp.pl?gene=FLACC1</a>             |
| DRAIC        | Downregulated RNA In Cancer, Inhibitor Of Cell Invasion And Migration | RNA Gene       | 15 | GC15P 117547 | 2.367 877 | <a href="https://www.genecards.org/cgi-bin/carddisp.pl?gene=DRAIC">https://www.genecards.org/cgi-bin/carddisp.pl?gene=DRAIC</a>               |
| LOC100506023 | Uncharacterized LOC100506023                                          | RNA Gene       | 11 | GC01M 173235 | 2.367 877 | <a href="https://www.genecards.org/cgi-bin/carddisp.pl?gene=LOC100506023">https://www.genecards.org/cgi-bin/carddisp.pl?gene=LOC100506023</a> |
| LOC100506403 | Uncharacterized LOC100506403                                          | RNA Gene       | 10 | GC21M 035372 | 2.367 877 | <a href="https://www.genecards.org/cgi-bin/carddisp.pl?gene=LOC100506403">https://www.genecards.org/cgi-bin/carddisp.pl?gene=LOC100506403</a> |
| RPL17P2 2    | Ribosomal Protein L17 Pseudogene 22                                   | Pseudo gene    | 8  | GC05P 056136 | 2.367 877 | <a href="https://www.genecards.org/cgi-bin/carddisp.pl?gene=RPL17P22">https://www.genecards.org/cgi-bin/carddisp.pl?gene=RPL17P22</a>         |
| FNIP1        | Folliculin Interacting Protein 1                                      | Protein Coding | 37 | GC05M 131641 | 2.362 982 | <a href="https://www.genecards.org/cgi-bin/carddisp.pl?gene=FNIP1">https://www.genecards.org/cgi-bin/carddisp.pl?gene=FNIP1</a>               |
| PREP         | Prolyl Endopeptidase                                                  | Protein Coding | 41 | GC06M 105277 | 2.361 022 | <a href="https://www.genecards.org/cgi-bin/carddisp.pl?gene=PREP">https://www.genecards.org/cgi-bin/carddisp.pl?gene=PREP</a>                 |
| SHH          | Sonic Hedgehog Signaling Molecule                                     | Protein Coding | 48 | GC07M 155799 | 2.360 765 | <a href="https://www.genecards.org/cgi-bin/carddisp.pl?gene=SHH">https://www.genecards.org/cgi-bin/carddisp.pl?gene=SHH</a>                   |
| FOLR1        | Folate Receptor Alpha                                                 | Protein Coding | 46 | GC11P 072190 | 2.360 765 | <a href="https://www.genecards.org/cgi-bin/carddisp.pl?gene=FOLR1">https://www.genecards.org/cgi-bin/carddisp.pl?gene=FOLR1</a>               |
| PIN1         | Peptidylprolyl Cis/Trans Isomerase, NIMA-Interacting 1                | Protein Coding | 45 | GC19P 009835 | 2.360 765 | <a href="https://www.genecards.org/cgi-bin/carddisp.pl?gene=PIN1">https://www.genecards.org/cgi-bin/carddisp.pl?gene=PIN1</a>                 |
| RB1          | RB Transcriptional Corepressor 1                                      | Protein Coding | 45 | GC13P 048303 | 2.360 765 | <a href="https://www.genecards.org/cgi-bin/carddisp.pl?gene=RB1">https://www.genecards.org/cgi-bin/carddisp.pl?gene=RB1</a>                   |
| NKIRAS 1     | NFKB Inhibitor Interacting Ras Like 1                                 | Protein Coding | 35 | GC03M 024218 | 2.360 765 | <a href="https://www.genecards.org/cgi-bin/carddisp.pl?gene=NKIRAS1">https://www.genecards.org/cgi-bin/carddisp.pl?gene=NKIRAS1</a>           |
| MIR410       | MicroRNA 410                                                          | RNA Gene       | 18 | GC14P 109990 | 2.360 765 | <a href="https://www.genecards.org/cgi-bin/carddisp.pl?gene=MIR410">https://www.genecards.org/cgi-bin/carddisp.pl?gene=MIR410</a>             |
| PTGER3       | Prostaglandin E Receptor 3                                            | Protein Coding | 45 | GC01M 070852 | 2.358 193 | <a href="https://www.genecards.org/cgi-">https://www.genecards.org/cgi-</a>                                                                   |

|          |                                                           |                |    |             |          |                                                                                                                                              |
|----------|-----------------------------------------------------------|----------------|----|-------------|----------|----------------------------------------------------------------------------------------------------------------------------------------------|
|          |                                                           |                |    |             |          | <a href="http://www.ncbi.nlm.nih.gov/ncbi/cdd/bin/carddisp.pl?gene=PTGER3">bin/carddisp.pl?gene=PTGER3</a>                                   |
| DEFA1    | Defensin Alpha 1                                          | Protein Coding | 40 | GC08M006977 | 2.354609 | <a href="http://www.ncbi.nlm.nih.gov/ncbi/cdd/bin/carddisp.pl?gene=DEFA1">https://www.genecards.org/cgi-bin/carddisp.pl?gene=DEFA1</a>       |
| PRELP    | Proline And Arginine Rich End Leucine Rich Repeat Protein | Protein Coding | 41 | GC01P203475 | 2.349858 | <a href="http://www.ncbi.nlm.nih.gov/ncbi/cdd/bin/carddisp.pl?gene=PRELP">https://www.genecards.org/cgi-bin/carddisp.pl?gene=PRELP</a>       |
| GAL      | Galanin And GMAP Prepropeptide                            | Protein Coding | 43 | GC11P070219 | 2.349816 | <a href="http://www.ncbi.nlm.nih.gov/ncbi/cdd/bin/carddisp.pl?gene=GAL">https://www.genecards.org/cgi-bin/carddisp.pl?gene=GAL</a>           |
| IGFBP5   | Insulin Like Growth Factor Binding Protein 5              | Protein Coding | 41 | GC02M216672 | 2.349499 | <a href="http://www.ncbi.nlm.nih.gov/ncbi/cdd/bin/carddisp.pl?gene=IGFBP5">https://www.genecards.org/cgi-bin/carddisp.pl?gene=IGFBP5</a>     |
| FNDC5    | Fibronectin Type III Domain Containing 5                  | Protein Coding | 33 | GC01M033185 | 2.348042 | <a href="http://www.ncbi.nlm.nih.gov/ncbi/cdd/bin/carddisp.pl?gene=FNDC5">https://www.genecards.org/cgi-bin/carddisp.pl?gene=FNDC5</a>       |
| MIR199A1 | MicroRNA 199a-1                                           | RNA Gene       | 20 | GC19M010817 | 2.348042 | <a href="http://www.ncbi.nlm.nih.gov/ncbi/cdd/bin/carddisp.pl?gene=MIR199A1">https://www.genecards.org/cgi-bin/carddisp.pl?gene=MIR199A1</a> |
| IFI44L   | Interferon Induced Protein 44 Like                        | Protein Coding | 33 | GC01P078619 | 2.345003 | <a href="http://www.ncbi.nlm.nih.gov/ncbi/cdd/bin/carddisp.pl?gene=IFI44L">https://www.genecards.org/cgi-bin/carddisp.pl?gene=IFI44L</a>     |
| ABHD16A  | Abhydrolase Domain Containing 16A, Phospholipase          | Protein Coding | 34 | GC06M065964 | 2.341229 | <a href="http://www.ncbi.nlm.nih.gov/ncbi/cdd/bin/carddisp.pl?gene=ABHD16A">https://www.genecards.org/cgi-bin/carddisp.pl?gene=ABHD16A</a>   |
| CYBB     | Cytochrome B-245 Beta Chain                               | Protein Coding | 46 | GC0XP037780 | 2.334452 | <a href="http://www.ncbi.nlm.nih.gov/ncbi/cdd/bin/carddisp.pl?gene=CYBB">https://www.genecards.org/cgi-bin/carddisp.pl?gene=CYBB</a>         |
| EXOSC10  | Exosome Component 10                                      | Protein Coding | 37 | GC01M011067 | 2.327669 | <a href="http://www.ncbi.nlm.nih.gov/ncbi/cdd/bin/carddisp.pl?gene=EXOSC10">https://www.genecards.org/cgi-bin/carddisp.pl?gene=EXOSC10</a>   |
| G3BP1    | G3BP Stress Granule Assembly Factor 1                     | Protein Coding | 39 | GC05P151771 | 2.326586 | <a href="http://www.ncbi.nlm.nih.gov/ncbi/cdd/bin/carddisp.pl?gene=G3BP1">https://www.genecards.org/cgi-bin/carddisp.pl?gene=G3BP1</a>       |
| MYDGF    | Myeloid Derived Growth Factor                             | Protein Coding | 32 | GC19M004641 | 2.326419 | <a href="http://www.ncbi.nlm.nih.gov/ncbi/cdd/bin/carddisp.pl?gene=MYDGF">https://www.genecards.org/cgi-bin/carddisp.pl?gene=MYDGF</a>       |
| PLA2G7   | Phospholipase A2 Group VII                                | Protein Coding | 48 | GC06M046704 | 2.323493 | <a href="http://www.ncbi.nlm.nih.gov/ncbi/cdd/bin/carddisp.pl?gene=PLA2G7">https://www.genecards.org/cgi-bin/carddisp.pl?gene=PLA2G7</a>     |

|         |                                                |                |    |             |          |                                                                                                                                     |
|---------|------------------------------------------------|----------------|----|-------------|----------|-------------------------------------------------------------------------------------------------------------------------------------|
| MDK     | Midkine                                        | Protein Coding | 42 | GC11P046380 | 2.320974 | <a href="https://www.genecards.org/cgi-bin/carddisp.pl?gene=MDK">https://www.genecards.org/cgi-bin/carddisp.pl?gene=MDK</a>         |
| DNAH8   | Dynein Axonemal Heavy Chain 8                  | Protein Coding | 37 | GC06P083874 | 2.320009 | <a href="https://www.genecards.org/cgi-bin/carddisp.pl?gene=DNAH8">https://www.genecards.org/cgi-bin/carddisp.pl?gene=DNAH8</a>     |
| DHX9    | DExH-Box Helicase 9                            | Protein Coding | 40 | GC01P182839 | 2.319866 | <a href="https://www.genecards.org/cgi-bin/carddisp.pl?gene=DHX9">https://www.genecards.org/cgi-bin/carddisp.pl?gene=DHX9</a>       |
| AREG    | Amphiregulin                                   | Protein Coding | 41 | GC04P074445 | 2.319048 | <a href="https://www.genecards.org/cgi-bin/carddisp.pl?gene=AREG">https://www.genecards.org/cgi-bin/carddisp.pl?gene=AREG</a>       |
| PTH1R   | Parathyroid Hormone 1 Receptor                 | Protein Coding | 47 | GC03P046877 | 2.318319 | <a href="https://www.genecards.org/cgi-bin/carddisp.pl?gene=PTH1R">https://www.genecards.org/cgi-bin/carddisp.pl?gene=PTH1R</a>     |
| EPHA2   | EPH Receptor A2                                | Protein Coding | 50 | GC01M016124 | 2.317036 | <a href="https://www.genecards.org/cgi-bin/carddisp.pl?gene=EPHA2">https://www.genecards.org/cgi-bin/carddisp.pl?gene=EPHA2</a>     |
| DSPP    | Dentin Sialophosphoprotein                     | Protein Coding | 38 | GC04P087608 | 2.315514 | <a href="https://www.genecards.org/cgi-bin/carddisp.pl?gene=DSPP">https://www.genecards.org/cgi-bin/carddisp.pl?gene=DSPP</a>       |
| FBXL19  | F-Box And Leucine Rich Repeat Protein 19       | Protein Coding | 34 | GC16P041107 | 2.315316 | <a href="https://www.genecards.org/cgi-bin/carddisp.pl?gene=FBXL19">https://www.genecards.org/cgi-bin/carddisp.pl?gene=FBXL19</a>   |
| CYP11B2 | Cytochrome P450 Family 11 Subfamily B Member 2 | Protein Coding | 46 | GC08M142910 | 2.315202 | <a href="https://www.genecards.org/cgi-bin/carddisp.pl?gene=CYP11B2">https://www.genecards.org/cgi-bin/carddisp.pl?gene=CYP11B2</a> |
| IFN1@   | Interferon, Type 1, Cluster                    | Gene Cluster   | 4  | GC09U990039 | 2.312373 | <a href="https://www.genecards.org/cgi-bin/carddisp.pl?gene=IFN1%40">https://www.genecards.org/cgi-bin/carddisp.pl?gene=IFN1%40</a> |
| XK      | X-Linked Kx Blood Group                        | Protein Coding | 40 | GC0XP037685 | 2.310287 | <a href="https://www.genecards.org/cgi-bin/carddisp.pl?gene=XK">https://www.genecards.org/cgi-bin/carddisp.pl?gene=XK</a>           |
| RPS6KA4 | Ribosomal Protein S6 Kinase A4                 | Protein Coding | 45 | GC11P064372 | 2.30478  | <a href="https://www.genecards.org/cgi-bin/carddisp.pl?gene=RPS6KA4">https://www.genecards.org/cgi-bin/carddisp.pl?gene=RPS6KA4</a> |
| RPS6KA5 | Ribosomal Protein S6 Kinase A5                 | Protein Coding | 44 | GC14M090847 | 2.30478  | <a href="https://www.genecards.org/cgi-bin/carddisp.pl?gene=RPS6KA5">https://www.genecards.org/cgi-bin/carddisp.pl?gene=RPS6KA5</a> |

|          |                                                     |                |    |             |          |                                                                                                                                       |
|----------|-----------------------------------------------------|----------------|----|-------------|----------|---------------------------------------------------------------------------------------------------------------------------------------|
| PIBF1    | Progesterone Immunomodulatory Binding Factor 1      | Protein Coding | 40 | GC13P072782 | 2.304326 | <a href="https://www.genecards.org/cgi-bin/carddisp.pl?gene=PIBF1">https://www.genecards.org/cgi-bin/carddisp.pl?gene=PIBF1</a>       |
| BRD4     | Bromodomain Containing 4                            | Protein Coding | 46 | GC19M015236 | 2.29945  | <a href="https://www.genecards.org/cgi-bin/carddisp.pl?gene=BRD4">https://www.genecards.org/cgi-bin/carddisp.pl?gene=BRD4</a>         |
| PMEL     | Premelanosome Protein                               | Protein Coding | 39 | GC12M055954 | 2.299239 | <a href="https://www.genecards.org/cgi-bin/carddisp.pl?gene=PMEL">https://www.genecards.org/cgi-bin/carddisp.pl?gene=PMEL</a>         |
| RAF1     | Raf-1 Proto-Oncogene, Serine/Threonine Kinase       | Protein Coding | 52 | GC03M012583 | 2.297447 | <a href="https://www.genecards.org/cgi-bin/carddisp.pl?gene=RAF1">https://www.genecards.org/cgi-bin/carddisp.pl?gene=RAF1</a>         |
| DHCR7    | 7-Dehydrocholesterol Reductase                      | Protein Coding | 45 | GC11M071428 | 2.296626 | <a href="https://www.genecards.org/cgi-bin/carddisp.pl?gene=DHCR7">https://www.genecards.org/cgi-bin/carddisp.pl?gene=DHCR7</a>       |
| NCAM1    | Neural Cell Adhesion Molecule 1                     | Protein Coding | 45 | GC11P112961 | 2.296626 | <a href="https://www.genecards.org/cgi-bin/carddisp.pl?gene=NCAM1">https://www.genecards.org/cgi-bin/carddisp.pl?gene=NCAM1</a>       |
| CDH13    | Cadherin 13                                         | Protein Coding | 43 | GC16P082626 | 2.296626 | <a href="https://www.genecards.org/cgi-bin/carddisp.pl?gene=CDH13">https://www.genecards.org/cgi-bin/carddisp.pl?gene=CDH13</a>       |
| MIR125B1 | MicroRNA 125b-1                                     | RNA Gene       | 21 | GC11M122100 | 2.296583 | <a href="https://www.genecards.org/cgi-bin/carddisp.pl?gene=MIR125B1">https://www.genecards.org/cgi-bin/carddisp.pl?gene=MIR125B1</a> |
| PLA2G3   | Phospholipase A2 Group III                          | Protein Coding | 37 | GC22M057204 | 2.296221 | <a href="https://www.genecards.org/cgi-bin/carddisp.pl?gene=PLA2G3">https://www.genecards.org/cgi-bin/carddisp.pl?gene=PLA2G3</a>     |
| P2RX4    | Purinergic Receptor P2X 4                           | Protein Coding | 44 | GC12P126222 | 2.293557 | <a href="https://www.genecards.org/cgi-bin/carddisp.pl?gene=P2RX4">https://www.genecards.org/cgi-bin/carddisp.pl?gene=P2RX4</a>       |
| NTF3     | Neurotrophin 3                                      | Protein Coding | 41 | GC12P021021 | 2.293143 | <a href="https://www.genecards.org/cgi-bin/carddisp.pl?gene=NTF3">https://www.genecards.org/cgi-bin/carddisp.pl?gene=NTF3</a>         |
| RAD23A   | RAD23 Homolog A, Nucleotide Excision Repair Protein | Protein Coding | 41 | GC19P014288 | 2.291109 | <a href="https://www.genecards.org/cgi-bin/carddisp.pl?gene=RAD23A">https://www.genecards.org/cgi-bin/carddisp.pl?gene=RAD23A</a>     |
| IHH      | Indian Hedgehog Signaling Molecule                  | Protein Coding | 45 | GC02M219054 | 2.290858 | <a href="https://www.genecards.org/cgi-bin/carddisp.pl?gene=IHH">https://www.genecards.org/cgi-bin/carddisp.pl?gene=IHH</a>           |
| SP1      | Sp1 Transcription Factor                            | Protein Coding | 44 | GC12P053380 | 2.289666 | <a href="https://www.genecards.org/cgi-">https://www.genecards.org/cgi-</a>                                                           |

|           |                                                       |                |    |             |          |                                                                                                                                       |
|-----------|-------------------------------------------------------|----------------|----|-------------|----------|---------------------------------------------------------------------------------------------------------------------------------------|
|           |                                                       |                |    |             |          | <a href="#">bin/carddisp.pl?gene=SP1</a>                                                                                              |
| MIR671    | MicroRNA 671                                          | RNA Gene       | 18 | GC07P151238 | 2.284522 | <a href="https://www.genecards.org/cgi-bin/carddisp.pl?gene=MIR671">https://www.genecards.org/cgi-bin/carddisp.pl?gene=MIR671</a>     |
| GABPA     | GA Binding Protein Transcription Factor Subunit Alpha | Protein Coding | 40 | GC21P025734 | 2.281812 | <a href="https://www.genecards.org/cgi-bin/carddisp.pl?gene=GABPA">https://www.genecards.org/cgi-bin/carddisp.pl?gene=GABPA</a>       |
| AARS1     | Alanyl-TRNA Synthetase 1                              | Protein Coding | 36 | GC16M070726 | 2.280768 | <a href="https://www.genecards.org/cgi-bin/carddisp.pl?gene=AARS1">https://www.genecards.org/cgi-bin/carddisp.pl?gene=AARS1</a>       |
| RBM5      | RNA Binding Motif Protein 5                           | Protein Coding | 38 | GC03P050340 | 2.280638 | <a href="https://www.genecards.org/cgi-bin/carddisp.pl?gene=RBM5">https://www.genecards.org/cgi-bin/carddisp.pl?gene=RBM5</a>         |
| ERBB2     | Erb-B2 Receptor Tyrosine Kinase 2                     | Protein Coding | 52 | GC17P039687 | 2.276579 | <a href="https://www.genecards.org/cgi-bin/carddisp.pl?gene=ERBB2">https://www.genecards.org/cgi-bin/carddisp.pl?gene=ERBB2</a>       |
| CCR9      | C-C Motif Chemokine Receptor 9                        | Protein Coding | 39 | GC03P046762 | 2.276031 | <a href="https://www.genecards.org/cgi-bin/carddisp.pl?gene=CCR9">https://www.genecards.org/cgi-bin/carddisp.pl?gene=CCR9</a>         |
| NR1H2     | Nuclear Receptor Subfamily 1 Group H Member 2         | Protein Coding | 45 | GC19P050329 | 2.275399 | <a href="https://www.genecards.org/cgi-bin/carddisp.pl?gene=NR1H2">https://www.genecards.org/cgi-bin/carddisp.pl?gene=NR1H2</a>       |
| FTO       | FTO Alpha-Ketoglutarate Dependent Dioxygenase         | Protein Coding | 44 | GC16P053832 | 2.27202  | <a href="https://www.genecards.org/cgi-bin/carddisp.pl?gene=FTO">https://www.genecards.org/cgi-bin/carddisp.pl?gene=FTO</a>           |
| HSP90A A1 | Heat Shock Protein 90 Alpha Family Class A Member 1   | Protein Coding | 46 | GC14M102080 | 2.271402 | <a href="https://www.genecards.org/cgi-bin/carddisp.pl?gene=HSP90AA1">https://www.genecards.org/cgi-bin/carddisp.pl?gene=HSP90AA1</a> |
| FCRLA     | Fc Receptor Like A                                    | Protein Coding | 36 | GC01P161712 | 2.270361 | <a href="https://www.genecards.org/cgi-bin/carddisp.pl?gene=FCRLA">https://www.genecards.org/cgi-bin/carddisp.pl?gene=FCRLA</a>       |
| HLA-DOB   | Major Histocompatibility Complex, Class II, DO Beta   | Protein Coding | 39 | GC06M066021 | 2.267646 | <a href="https://www.genecards.org/cgi-bin/carddisp.pl?gene=HLA-DOB">https://www.genecards.org/cgi-bin/carddisp.pl?gene=HLA-DOB</a>   |
| FLT3      | Fms Related Receptor Tyrosine Kinase 3                | Protein Coding | 50 | GC13M028003 | 2.267602 | <a href="https://www.genecards.org/cgi-bin/carddisp.pl?gene=FLT3">https://www.genecards.org/cgi-bin/carddisp.pl?gene=FLT3</a>         |
| ORM1      | Orosomucoid 1                                         | Protein Coding | 40 | GC09P114323 | 2.265629 | <a href="https://www.genecards.org/cgi-bin/carddisp.pl?gene=ORM1">https://www.genecards.org/cgi-bin/carddisp.pl?gene=ORM1</a>         |

|         |                                                       |                |    |             |          |                                                                                                                                     |
|---------|-------------------------------------------------------|----------------|----|-------------|----------|-------------------------------------------------------------------------------------------------------------------------------------|
| CD24    | CD24 Molecule                                         | Protein Coding | 34 | GC06M106969 | 2.262617 | <a href="https://www.genecards.org/cgi-bin/carddisp.pl?gene=CD24">https://www.genecards.org/cgi-bin/carddisp.pl?gene=CD24</a>       |
| MIR23A  | MicroRNA 23a                                          | RNA Gene       | 21 | GC19M014485 | 2.262336 | <a href="https://www.genecards.org/cgi-bin/carddisp.pl?gene=MIR23A">https://www.genecards.org/cgi-bin/carddisp.pl?gene=MIR23A</a>   |
| HSD11B1 | Hydroxysteroid 11-Beta Dehydrogenase 1                | Protein Coding | 49 | GC01P209686 | 2.259933 | <a href="https://www.genecards.org/cgi-bin/carddisp.pl?gene=HSD11B1">https://www.genecards.org/cgi-bin/carddisp.pl?gene=HSD11B1</a> |
| LOX     | Lysyl Oxidase                                         | Protein Coding | 45 | GC05M122063 | 2.259019 | <a href="https://www.genecards.org/cgi-bin/carddisp.pl?gene=LOX">https://www.genecards.org/cgi-bin/carddisp.pl?gene=LOX</a>         |
| XRCC4   | X-Ray Repair Cross Complementing 4                    | Protein Coding | 42 | GC05P083077 | 2.258352 | <a href="https://www.genecards.org/cgi-bin/carddisp.pl?gene=XRCC4">https://www.genecards.org/cgi-bin/carddisp.pl?gene=XRCC4</a>     |
| C9orf72 | C9orf72-SMCR8 Complex Subunit                         | Protein Coding | 40 | GC09M028335 | 2.254973 | <a href="https://www.genecards.org/cgi-bin/carddisp.pl?gene=C9orf72">https://www.genecards.org/cgi-bin/carddisp.pl?gene=C9orf72</a> |
| CCL16   | C-C Motif Chemokine Ligand 16                         | Protein Coding | 36 | GC17M035976 | 2.254636 | <a href="https://www.genecards.org/cgi-bin/carddisp.pl?gene=CCL16">https://www.genecards.org/cgi-bin/carddisp.pl?gene=CCL16</a>     |
| CLEC4E  | C-Type Lectin Domain Family 4 Member E                | Protein Coding | 36 | GC12M008535 | 2.252613 | <a href="https://www.genecards.org/cgi-bin/carddisp.pl?gene=CLEC4E">https://www.genecards.org/cgi-bin/carddisp.pl?gene=CLEC4E</a>   |
| HSPB8   | Heat Shock Protein Family B (Small) Member 8          | Protein Coding | 43 | GC12P119173 | 2.251756 | <a href="https://www.genecards.org/cgi-bin/carddisp.pl?gene=HSPB8">https://www.genecards.org/cgi-bin/carddisp.pl?gene=HSPB8</a>     |
| STATH   | Statherin                                             | Protein Coding | 32 | GC04P069995 | 2.251756 | <a href="https://www.genecards.org/cgi-bin/carddisp.pl?gene=STATH">https://www.genecards.org/cgi-bin/carddisp.pl?gene=STATH</a>     |
| SDHB    | Succinate Dehydrogenase Complex Iron Sulfur Subunit B | Protein Coding | 46 | GC01M018063 | 2.249802 | <a href="https://www.genecards.org/cgi-bin/carddisp.pl?gene=SDHB">https://www.genecards.org/cgi-bin/carddisp.pl?gene=SDHB</a>       |
| FURIN   | Furin, Paired Basic Amino Acid Cleaving Enzyme        | Protein Coding | 44 | GC15P090868 | 2.248796 | <a href="https://www.genecards.org/cgi-bin/carddisp.pl?gene=FURIN">https://www.genecards.org/cgi-bin/carddisp.pl?gene=FURIN</a>     |
| XRCC6   | X-Ray Repair Cross Complementing 6                    | Protein Coding | 43 | GC22P041622 | 2.248682 | <a href="https://www.genecards.org/cgi-bin/carddisp.pl?gene=XRCC6">https://www.genecards.org/cgi-bin/carddisp.pl?gene=XRCC6</a>     |
| CD200   | CD200 Molecule                                        | Protein Coding | 39 | GC03P112332 | 2.247104 | <a href="https://www.genecards.org/cgi-">https://www.genecards.org/cgi-</a>                                                         |

|         |                                                      |                |    |             |          |                                                                                                                                            |
|---------|------------------------------------------------------|----------------|----|-------------|----------|--------------------------------------------------------------------------------------------------------------------------------------------|
|         |                                                      |                |    |             |          | <a href="http://www.ncbi.nlm.nih.gov/ncbi/cdd/bin/carddisp.pl?gene=CD200">bin/carddisp.pl?gene=CD200</a>                                   |
| CRYGD   | Crystallin Gamma D                                   | Protein Coding | 40 | GC02M208121 | 2.243869 | <a href="http://www.ncbi.nlm.nih.gov/ncbi/cdd/bin/carddisp.pl?gene=CRYGD">https://www.genecards.org/cgi-bin/carddisp.pl?gene=CRYGD</a>     |
| SMAD7   | SMAD Family Member 7                                 | Protein Coding | 42 | GC18M048919 | 2.243227 | <a href="http://www.ncbi.nlm.nih.gov/ncbi/cdd/bin/carddisp.pl?gene=SMAD7">https://www.genecards.org/cgi-bin/carddisp.pl?gene=SMAD7</a>     |
| KCNQ1   | Potassium Voltage-Gated Channel Subfamily Q Member 1 | Protein Coding | 48 | GC11P002444 | 2.241961 | <a href="http://www.ncbi.nlm.nih.gov/ncbi/cdd/bin/carddisp.pl?gene=KCNQ1">https://www.genecards.org/cgi-bin/carddisp.pl?gene=KCNQ1</a>     |
| MSMB    | Microseminoprotein Beta                              | Protein Coding | 40 | GC10M046033 | 2.241961 | <a href="http://www.ncbi.nlm.nih.gov/ncbi/cdd/bin/carddisp.pl?gene=MSMB">https://www.genecards.org/cgi-bin/carddisp.pl?gene=MSMB</a>       |
| F2R     | Coagulation Factor II Thrombin Receptor              | Protein Coding | 45 | GC05P076716 | 2.241956 | <a href="http://www.ncbi.nlm.nih.gov/ncbi/cdd/bin/carddisp.pl?gene=F2R">https://www.genecards.org/cgi-bin/carddisp.pl?gene=F2R</a>         |
| GCG     | Glucagon                                             | Protein Coding | 40 | GC02M162142 | 2.241231 | <a href="http://www.ncbi.nlm.nih.gov/ncbi/cdd/bin/carddisp.pl?gene=GCG">https://www.genecards.org/cgi-bin/carddisp.pl?gene=GCG</a>         |
| ID1     | Inhibitor Of DNA Binding 1, HLH Protein              | Protein Coding | 40 | GC20P031605 | 2.23832  | <a href="http://www.ncbi.nlm.nih.gov/ncbi/cdd/bin/carddisp.pl?gene=ID1">https://www.genecards.org/cgi-bin/carddisp.pl?gene=ID1</a>         |
| XCR1    | X-C Motif Chemokine Receptor 1                       | Protein Coding | 36 | GC03M046016 | 2.236719 | <a href="http://www.ncbi.nlm.nih.gov/ncbi/cdd/bin/carddisp.pl?gene=XCR1">https://www.genecards.org/cgi-bin/carddisp.pl?gene=XCR1</a>       |
| EFNB1   | Ephrin B1                                            | Protein Coding | 44 | GC0XP068828 | 2.236017 | <a href="http://www.ncbi.nlm.nih.gov/ncbi/cdd/bin/carddisp.pl?gene=EFNB1">https://www.genecards.org/cgi-bin/carddisp.pl?gene=EFNB1</a>     |
| EPHB4   | EPH Receptor B4                                      | Protein Coding | 50 | GC07M101954 | 2.235579 | <a href="http://www.ncbi.nlm.nih.gov/ncbi/cdd/bin/carddisp.pl?gene=EPHB4">https://www.genecards.org/cgi-bin/carddisp.pl?gene=EPHB4</a>     |
| SPHK2   | Sphingosine Kinase 2                                 | Protein Coding | 42 | GC19P048619 | 2.233071 | <a href="http://www.ncbi.nlm.nih.gov/ncbi/cdd/bin/carddisp.pl?gene=SPHK2">https://www.genecards.org/cgi-bin/carddisp.pl?gene=SPHK2</a>     |
| RPS19   | Ribosomal Protein S19                                | Protein Coding | 47 | GC19P066764 | 2.23246  | <a href="http://www.ncbi.nlm.nih.gov/ncbi/cdd/bin/carddisp.pl?gene=RPS19">https://www.genecards.org/cgi-bin/carddisp.pl?gene=RPS19</a>     |
| TMPRSS6 | Transmembrane Serine Protease 6                      | Protein Coding | 44 | GC22M057362 | 2.231264 | <a href="http://www.ncbi.nlm.nih.gov/ncbi/cdd/bin/carddisp.pl?gene=TMPRSS6">https://www.genecards.org/cgi-bin/carddisp.pl?gene=TMPRSS6</a> |



|        |                                                |                |    |             |          |                                                                                                                                   |
|--------|------------------------------------------------|----------------|----|-------------|----------|-----------------------------------------------------------------------------------------------------------------------------------|
| PTN    | Pleiotrophin                                   | Protein Coding | 41 | GC07M137227 | 2.230502 | <a href="https://www.genecards.org/cgi-bin/carddisp.pl?gene=PTN">https://www.genecards.org/cgi-bin/carddisp.pl?gene=PTN</a>       |
| IL17C  | Interleukin 17C                                | Protein Coding | 36 | GC16P088638 | 2.229349 | <a href="https://www.genecards.org/cgi-bin/carddisp.pl?gene=IL17C">https://www.genecards.org/cgi-bin/carddisp.pl?gene=IL17C</a>   |
| AMH    | Anti-Mullerian Hormone                         | Protein Coding | 43 | GC19P002938 | 2.229279 | <a href="https://www.genecards.org/cgi-bin/carddisp.pl?gene=AMH">https://www.genecards.org/cgi-bin/carddisp.pl?gene=AMH</a>       |
| PNOC   | Prepronociceptin                               | Protein Coding | 37 | GC08P028316 | 2.22883  | <a href="https://www.genecards.org/cgi-bin/carddisp.pl?gene=PNOC">https://www.genecards.org/cgi-bin/carddisp.pl?gene=PNOC</a>     |
| HEXB   | Hexosaminidase Subunit Beta                    | Protein Coding | 47 | GC05P074640 | 2.227483 | <a href="https://www.genecards.org/cgi-bin/carddisp.pl?gene=HEXB">https://www.genecards.org/cgi-bin/carddisp.pl?gene=HEXB</a>     |
| NOTCH2 | Notch Receptor 2                               | Protein Coding | 48 | GC01M119911 | 2.224988 | <a href="https://www.genecards.org/cgi-bin/carddisp.pl?gene=NOTCH2">https://www.genecards.org/cgi-bin/carddisp.pl?gene=NOTCH2</a> |
| PIK3R2 | Phosphoinositide-3-Kinase Regulatory Subunit 2 | Protein Coding | 48 | GC19P018153 | 2.224885 | <a href="https://www.genecards.org/cgi-bin/carddisp.pl?gene=PIK3R2">https://www.genecards.org/cgi-bin/carddisp.pl?gene=PIK3R2</a> |
| GNB3   | G Protein Subunit Beta 3                       | Protein Coding | 45 | GC12P006839 | 2.224885 | <a href="https://www.genecards.org/cgi-bin/carddisp.pl?gene=GNB3">https://www.genecards.org/cgi-bin/carddisp.pl?gene=GNB3</a>     |
| SOCS2  | Suppressor Of Cytokine Signaling 2             | Protein Coding | 42 | GC12P093569 | 2.224885 | <a href="https://www.genecards.org/cgi-bin/carddisp.pl?gene=SOCS2">https://www.genecards.org/cgi-bin/carddisp.pl?gene=SOCS2</a>   |
| APOA4  | Apolipoprotein A4                              | Protein Coding | 40 | GC11M116820 | 2.224885 | <a href="https://www.genecards.org/cgi-bin/carddisp.pl?gene=APOA4">https://www.genecards.org/cgi-bin/carddisp.pl?gene=APOA4</a>   |
| FGF21  | Fibroblast Growth Factor 21                    | Protein Coding | 37 | GC19P067053 | 2.224885 | <a href="https://www.genecards.org/cgi-bin/carddisp.pl?gene=FGF21">https://www.genecards.org/cgi-bin/carddisp.pl?gene=FGF21</a>   |
| MST1R  | Macrophage Stimulating 1 Receptor              | Protein Coding | 47 | GC03M051216 | 2.224122 | <a href="https://www.genecards.org/cgi-bin/carddisp.pl?gene=MST1R">https://www.genecards.org/cgi-bin/carddisp.pl?gene=MST1R</a>   |
| EPHA1  | EPH Receptor A1                                | Protein Coding | 45 | GC07M143390 | 2.224122 | <a href="https://www.genecards.org/cgi-bin/carddisp.pl?gene=EPHA1">https://www.genecards.org/cgi-bin/carddisp.pl?gene=EPHA1</a>   |
| THY1   | Thy-1 Cell Surface Antigen                     | Protein Coding | 41 | GC11M119417 | 2.220407 | <a href="https://www.genecards.org/cgi-">https://www.genecards.org/cgi-</a>                                                       |

|          |                                               |                |    |             |          |                                                                                                                                              |
|----------|-----------------------------------------------|----------------|----|-------------|----------|----------------------------------------------------------------------------------------------------------------------------------------------|
|          |                                               |                |    |             |          | <a href="http://www.ncbi.nlm.nih.gov/ncbi/cdd/bin/carddisp.pl?gene=THY1">bin/carddisp.pl?gene=THY1</a>                                       |
| HSPA1B   | Heat Shock Protein Family A (Hsp70) Member 1B | Protein Coding | 39 | GC06P083712 | 2.2197   | <a href="http://www.ncbi.nlm.nih.gov/ncbi/cdd/bin/carddisp.pl?gene=HSPA1B">https://www.genecards.org/cgi-bin/carddisp.pl?gene=HSPA1B</a>     |
| NR2F2    | Nuclear Receptor Subfamily 2 Group F Member 2 | Protein Coding | 48 | GC15P096325 | 2.218796 | <a href="http://www.ncbi.nlm.nih.gov/ncbi/cdd/bin/carddisp.pl?gene=NR2F2">https://www.genecards.org/cgi-bin/carddisp.pl?gene=NR2F2</a>       |
| SMPD1    | Sphingomyelin Phosphodiesterase 1             | Protein Coding | 47 | GC11P006390 | 2.215846 | <a href="http://www.ncbi.nlm.nih.gov/ncbi/cdd/bin/carddisp.pl?gene=SMPD1">https://www.genecards.org/cgi-bin/carddisp.pl?gene=SMPD1</a>       |
| CBL      | Cbl Proto-Oncogene                            | Protein Coding | 49 | GC11P119206 | 2.212377 | <a href="http://www.ncbi.nlm.nih.gov/ncbi/cdd/bin/carddisp.pl?gene=CBL">https://www.genecards.org/cgi-bin/carddisp.pl?gene=CBL</a>           |
| GPBAR1   | G Protein-Coupled Bile Acid Receptor 1        | Protein Coding | 39 | GC02P218259 | 2.208249 | <a href="http://www.ncbi.nlm.nih.gov/ncbi/cdd/bin/carddisp.pl?gene=GPBAR1">https://www.genecards.org/cgi-bin/carddisp.pl?gene=GPBAR1</a>     |
| CCND1    | Cyclin D1                                     | Protein Coding | 49 | GC11P069641 | 2.206554 | <a href="http://www.ncbi.nlm.nih.gov/ncbi/cdd/bin/carddisp.pl?gene=CCND1">https://www.genecards.org/cgi-bin/carddisp.pl?gene=CCND1</a>       |
| FECH     | Ferrochelatase                                | Protein Coding | 45 | GC18M057544 | 2.202175 | <a href="http://www.ncbi.nlm.nih.gov/ncbi/cdd/bin/carddisp.pl?gene=FECH">https://www.genecards.org/cgi-bin/carddisp.pl?gene=FECH</a>         |
| CRYAA    | Crystallin Alpha A                            | Protein Coding | 44 | GC21P043169 | 2.202175 | <a href="http://www.ncbi.nlm.nih.gov/ncbi/cdd/bin/carddisp.pl?gene=CRYAA">https://www.genecards.org/cgi-bin/carddisp.pl?gene=CRYAA</a>       |
| PON2     | Paraoxonase 2                                 | Protein Coding | 43 | GC07M095404 | 2.202175 | <a href="http://www.ncbi.nlm.nih.gov/ncbi/cdd/bin/carddisp.pl?gene=PON2">https://www.genecards.org/cgi-bin/carddisp.pl?gene=PON2</a>         |
| CPVL     | Carboxypeptidase Vitellogenic Like            | Protein Coding | 40 | GC07M028995 | 2.202175 | <a href="http://www.ncbi.nlm.nih.gov/ncbi/cdd/bin/carddisp.pl?gene=CPVL">https://www.genecards.org/cgi-bin/carddisp.pl?gene=CPVL</a>         |
| SERPINB2 | Serpin Family B Member 2                      | Protein Coding | 42 | GC18P063871 | 2.199308 | <a href="http://www.ncbi.nlm.nih.gov/ncbi/cdd/bin/carddisp.pl?gene=SERPINB2">https://www.genecards.org/cgi-bin/carddisp.pl?gene=SERPINB2</a> |
| NQO1     | NAD(P)H Quinone Dehydrogenase 1               | Protein Coding | 46 | GC16M069706 | 2.196864 | <a href="http://www.ncbi.nlm.nih.gov/ncbi/cdd/bin/carddisp.pl?gene=NQO1">https://www.genecards.org/cgi-bin/carddisp.pl?gene=NQO1</a>         |
| CA3      | Carbonic Anhydrase 3                          | Protein Coding | 41 | GC08P085373 | 2.194562 | <a href="http://www.ncbi.nlm.nih.gov/ncbi/cdd/bin/carddisp.pl?gene=CA3">https://www.genecards.org/cgi-bin/carddisp.pl?gene=CA3</a>           |

|         |                                                                                       |                |    |             |          |                                                                                                                                     |
|---------|---------------------------------------------------------------------------------------|----------------|----|-------------|----------|-------------------------------------------------------------------------------------------------------------------------------------|
| LCAT    | Lecithin-Cholesterol Acyltransferase                                                  | Protein Coding | 46 | GC16M067939 | 2.191862 | <a href="https://www.genecards.org/cgi-bin/carddisp.pl?gene=LCAT">https://www.genecards.org/cgi-bin/carddisp.pl?gene=LCAT</a>       |
| TNNI3   | Troponin I3, Cardiac Type                                                             | Protein Coding | 47 | GC19M055151 | 2.191213 | <a href="https://www.genecards.org/cgi-bin/carddisp.pl?gene=TNNI3">https://www.genecards.org/cgi-bin/carddisp.pl?gene=TNNI3</a>     |
| CDH6    | Cadherin 6                                                                            | Protein Coding | 41 | GC05P031193 | 2.190388 | <a href="https://www.genecards.org/cgi-bin/carddisp.pl?gene=CDH6">https://www.genecards.org/cgi-bin/carddisp.pl?gene=CDH6</a>       |
| SENPI   | SUMO Specific Peptidase 1                                                             | Protein Coding | 42 | GC12M048042 | 2.190304 | <a href="https://www.genecards.org/cgi-bin/carddisp.pl?gene=SENPI">https://www.genecards.org/cgi-bin/carddisp.pl?gene=SENPI</a>     |
| MLN     | Motilin                                                                               | Protein Coding | 34 | GC06M033794 | 2.186746 | <a href="https://www.genecards.org/cgi-bin/carddisp.pl?gene=MLN">https://www.genecards.org/cgi-bin/carddisp.pl?gene=MLN</a>         |
| PLA2G6  | Phospholipase A2 Group VI                                                             | Protein Coding | 46 | GC22M058815 | 2.1863   | <a href="https://www.genecards.org/cgi-bin/carddisp.pl?gene=PLA2G6">https://www.genecards.org/cgi-bin/carddisp.pl?gene=PLA2G6</a>   |
| MFAP4   | Microfibril Associated Protein 4                                                      | Protein Coding | 39 | GC17M019383 | 2.18326  | <a href="https://www.genecards.org/cgi-bin/carddisp.pl?gene=MFAP4">https://www.genecards.org/cgi-bin/carddisp.pl?gene=MFAP4</a>     |
| TBX5    | T-Box Transcription Factor 5                                                          | Protein Coding | 45 | GC12M114353 | 2.182817 | <a href="https://www.genecards.org/cgi-bin/carddisp.pl?gene=TBX5">https://www.genecards.org/cgi-bin/carddisp.pl?gene=TBX5</a>       |
| BSN     | Bassoon Presynaptic Cytomatrix Protein                                                | Protein Coding | 36 | GC03P049554 | 2.174019 | <a href="https://www.genecards.org/cgi-bin/carddisp.pl?gene=BSN">https://www.genecards.org/cgi-bin/carddisp.pl?gene=BSN</a>         |
| PAX5    | Paired Box 5                                                                          | Protein Coding | 45 | GC09M036834 | 2.172556 | <a href="https://www.genecards.org/cgi-bin/carddisp.pl?gene=PAX5">https://www.genecards.org/cgi-bin/carddisp.pl?gene=PAX5</a>       |
| KNG1    | Kininogen 1                                                                           | Protein Coding | 45 | GC03P186717 | 2.170991 | <a href="https://www.genecards.org/cgi-bin/carddisp.pl?gene=KNG1">https://www.genecards.org/cgi-bin/carddisp.pl?gene=KNG1</a>       |
| KIR2DS4 | Killer Cell Immunoglobulin Like Receptor, Two Ig Domains And Short Cytoplasmic Tail 4 | Protein Coding | 32 | GC19P067385 | 2.170483 | <a href="https://www.genecards.org/cgi-bin/carddisp.pl?gene=KIR2DS4">https://www.genecards.org/cgi-bin/carddisp.pl?gene=KIR2DS4</a> |
| POU2AF1 | POU Class 2 Homeobox Associating Factor 1                                             | Protein Coding | 37 | GC11M111352 | 2.169985 | <a href="https://www.genecards.org/cgi-bin/carddisp.pl?gene=POU2AF1">https://www.genecards.org/cgi-bin/carddisp.pl?gene=POU2AF1</a> |

|         |                                                                 |                |    |             |          |                                                                                                                                     |
|---------|-----------------------------------------------------------------|----------------|----|-------------|----------|-------------------------------------------------------------------------------------------------------------------------------------|
| CYP7B1  | Cytochrome P450 Family 7 Subfamily B Member 1                   | Protein Coding | 45 | GC08M064587 | 2.169137 | <a href="https://www.genecards.org/cgi-bin/carddisp.pl?gene=CYP7B1">https://www.genecards.org/cgi-bin/carddisp.pl?gene=CYP7B1</a>   |
| TIMMDC1 | Translocase Of Inner Mitochondrial Membrane Domain Containing 1 | Protein Coding | 36 | GC03P119498 | 2.166089 | <a href="https://www.genecards.org/cgi-bin/carddisp.pl?gene=TIMMDC1">https://www.genecards.org/cgi-bin/carddisp.pl?gene=TIMMDC1</a> |
| IRS1    | Insulin Receptor Substrate 1                                    | Protein Coding | 45 | GC02M226731 | 2.165745 | <a href="https://www.genecards.org/cgi-bin/carddisp.pl?gene=IRS1">https://www.genecards.org/cgi-bin/carddisp.pl?gene=IRS1</a>       |
| ITGA9   | Integrin Subunit Alpha 9                                        | Protein Coding | 42 | GC03P037468 | 2.165147 | <a href="https://www.genecards.org/cgi-bin/carddisp.pl?gene=ITGA9">https://www.genecards.org/cgi-bin/carddisp.pl?gene=ITGA9</a>     |
| CSNK2B  | Casein Kinase 2 Beta                                            | Protein Coding | 46 | GC06P083698 | 2.163656 | <a href="https://www.genecards.org/cgi-bin/carddisp.pl?gene=CSNK2B">https://www.genecards.org/cgi-bin/carddisp.pl?gene=CSNK2B</a>   |
| LY6G5C  | Lymphocyte Antigen 6 Family Member G5C                          | Protein Coding | 26 | GC06M031676 | 2.163656 | <a href="https://www.genecards.org/cgi-bin/carddisp.pl?gene=LY6G5C">https://www.genecards.org/cgi-bin/carddisp.pl?gene=LY6G5C</a>   |
| AOC3    | Amine Oxidase Copper Containing 3                               | Protein Coding | 44 | GC17P042851 | 2.160178 | <a href="https://www.genecards.org/cgi-bin/carddisp.pl?gene=AOC3">https://www.genecards.org/cgi-bin/carddisp.pl?gene=AOC3</a>       |
| HSPE1   | Heat Shock Protein Family E (Hsp10) Member 1                    | Protein Coding | 41 | GC02P197501 | 2.159625 | <a href="https://www.genecards.org/cgi-bin/carddisp.pl?gene=HSPE1">https://www.genecards.org/cgi-bin/carddisp.pl?gene=HSPE1</a>     |
| SCARB1  | Scavenger Receptor Class B Member 1                             | Protein Coding | 45 | GC12M124776 | 2.158652 | <a href="https://www.genecards.org/cgi-bin/carddisp.pl?gene=SCARB1">https://www.genecards.org/cgi-bin/carddisp.pl?gene=SCARB1</a>   |
| SLC35D1 | Solute Carrier Family 35 Member D1                              | Protein Coding | 40 | GC01M066999 | 2.158569 | <a href="https://www.genecards.org/cgi-bin/carddisp.pl?gene=SLC35D1">https://www.genecards.org/cgi-bin/carddisp.pl?gene=SLC35D1</a> |
| LIFR    | LIF Receptor Subunit Alpha                                      | Protein Coding | 45 | GC05M038475 | 2.15737  | <a href="https://www.genecards.org/cgi-bin/carddisp.pl?gene=LIFR">https://www.genecards.org/cgi-bin/carddisp.pl?gene=LIFR</a>       |
| MC3R    | Melanocortin 3 Receptor                                         | Protein Coding | 41 | GC20P056248 | 2.156837 | <a href="https://www.genecards.org/cgi-bin/carddisp.pl?gene=MC3R">https://www.genecards.org/cgi-bin/carddisp.pl?gene=MC3R</a>       |
| TTN     | Titin                                                           | Protein Coding | 45 | GC02M178525 | 2.156324 | <a href="https://www.genecards.org/cgi-bin/carddisp.pl?gene=TTN">https://www.genecards.org/cgi-bin/carddisp.pl?gene=TTN</a>         |

|          |                                                |                |    |             |          |                                                                                                                                       |
|----------|------------------------------------------------|----------------|----|-------------|----------|---------------------------------------------------------------------------------------------------------------------------------------|
| MIR98    | MicroRNA 98                                    | RNA Gene       | 19 | GC0XM053636 | 2.155567 | <a href="https://www.genecards.org/cgi-bin/carddisp.pl?gene=MIR98">https://www.genecards.org/cgi-bin/carddisp.pl?gene=MIR98</a>       |
| IL36B    | Interleukin 36 Beta                            | Protein Coding | 33 | GC02M113022 | 2.155266 | <a href="https://www.genecards.org/cgi-bin/carddisp.pl?gene=IL36B">https://www.genecards.org/cgi-bin/carddisp.pl?gene=IL36B</a>       |
| SERPINA6 | Serpin Family A Member 6                       | Protein Coding | 44 | GC14M101180 | 2.1537   | <a href="https://www.genecards.org/cgi-bin/carddisp.pl?gene=SERPINA6">https://www.genecards.org/cgi-bin/carddisp.pl?gene=SERPINA6</a> |
| FLNA     | Filamin A                                      | Protein Coding | 46 | GC0XM154348 | 2.15173  | <a href="https://www.genecards.org/cgi-bin/carddisp.pl?gene=FLNA">https://www.genecards.org/cgi-bin/carddisp.pl?gene=FLNA</a>         |
| MIR9-1   | MicroRNA 9-1                                   | RNA Gene       | 21 | GC01M156420 | 2.150877 | <a href="https://www.genecards.org/cgi-bin/carddisp.pl?gene=MIR9-1">https://www.genecards.org/cgi-bin/carddisp.pl?gene=MIR9-1</a>     |
| IL2RG    | Interleukin 2 Receptor Subunit Gamma           | Protein Coding | 45 | GC0XM071108 | 2.150013 | <a href="https://www.genecards.org/cgi-bin/carddisp.pl?gene=IL2RG">https://www.genecards.org/cgi-bin/carddisp.pl?gene=IL2RG</a>       |
| RNASE2   | Ribonuclease A Family Member 2                 | Protein Coding | 39 | GC14P032471 | 2.146551 | <a href="https://www.genecards.org/cgi-bin/carddisp.pl?gene=RNASE2">https://www.genecards.org/cgi-bin/carddisp.pl?gene=RNASE2</a>     |
| PLD1     | Phospholipase D1                               | Protein Coding | 47 | GC03M171600 | 2.145625 | <a href="https://www.genecards.org/cgi-bin/carddisp.pl?gene=PLD1">https://www.genecards.org/cgi-bin/carddisp.pl?gene=PLD1</a>         |
| SNRPD3   | Small Nuclear Ribonucleoprotein D3 Polypeptide | Protein Coding | 35 | GC22P024555 | 2.145243 | <a href="https://www.genecards.org/cgi-bin/carddisp.pl?gene=SNRPD3">https://www.genecards.org/cgi-bin/carddisp.pl?gene=SNRPD3</a>     |
| GP6      | Glycoprotein VI Platelet                       | Protein Coding | 44 | GC19M055013 | 2.143559 | <a href="https://www.genecards.org/cgi-bin/carddisp.pl?gene=GP6">https://www.genecards.org/cgi-bin/carddisp.pl?gene=GP6</a>           |
| GAB2     | GRB2 Associated Binding Protein 2              | Protein Coding | 42 | GC11M078215 | 2.143083 | <a href="https://www.genecards.org/cgi-bin/carddisp.pl?gene=GAB2">https://www.genecards.org/cgi-bin/carddisp.pl?gene=GAB2</a>         |
| ITGB5    | Integrin Subunit Beta 5                        | Protein Coding | 45 | GC03M124761 | 2.142881 | <a href="https://www.genecards.org/cgi-bin/carddisp.pl?gene=ITGB5">https://www.genecards.org/cgi-bin/carddisp.pl?gene=ITGB5</a>       |
| PLA2G1B  | Phospholipase A2 Group IB                      | Protein Coding | 43 | GC12M120322 | 2.142442 | <a href="https://www.genecards.org/cgi-bin/carddisp.pl?gene=PLA2G1B">https://www.genecards.org/cgi-bin/carddisp.pl?gene=PLA2G1B</a>   |
| IRGM     | Immunity Related GTPase M                      | Protein Coding | 35 | GC05P150846 | 2.142442 | <a href="https://www.genecards.org/cgi-bin/carddisp.pl?gene=IRGM">https://www.genecards.org/cgi-bin/carddisp.pl?gene=IRGM</a>         |

|           |                                                        |                |    |             |          |                                                                                                                                         |
|-----------|--------------------------------------------------------|----------------|----|-------------|----------|-----------------------------------------------------------------------------------------------------------------------------------------|
|           |                                                        |                |    |             |          | bin/carddisp.pl?gene=IRGM                                                                                                               |
| SFTPA1    | Surfactant Protein A1                                  | Protein Coding | 42 | GC10P093438 | 2.142258 | <a href="https://www.genecards.org/cgi-bin/carddisp.pl?gene=SFTPA1">https://www.genecards.org/cgi-bin/carddisp.pl?gene=SFTPA1</a>       |
| SFTPC     | Surfactant Protein C                                   | Protein Coding | 41 | GC08P022156 | 2.142258 | <a href="https://www.genecards.org/cgi-bin/carddisp.pl?gene=SFTPC">https://www.genecards.org/cgi-bin/carddisp.pl?gene=SFTPC</a>         |
| CTF1      | Cardiotrophin 1                                        | Protein Coding | 37 | GC16P041104 | 2.137983 | <a href="https://www.genecards.org/cgi-bin/carddisp.pl?gene=CTF1">https://www.genecards.org/cgi-bin/carddisp.pl?gene=CTF1</a>           |
| TNFRSF10D | TNF Receptor Superfamily Member 10d                    | Protein Coding | 40 | GC08M023135 | 2.133998 | <a href="https://www.genecards.org/cgi-bin/carddisp.pl?gene=TNFRSF10D">https://www.genecards.org/cgi-bin/carddisp.pl?gene=TNFRSF10D</a> |
| ASIC1     | Acid Sensing Ion Channel Subunit 1                     | Protein Coding | 42 | GC12P050057 | 2.133133 | <a href="https://www.genecards.org/cgi-bin/carddisp.pl?gene=ASIC1">https://www.genecards.org/cgi-bin/carddisp.pl?gene=ASIC1</a>         |
| CAPN2     | Calpain 2                                              | Protein Coding | 45 | GC01P223701 | 2.13271  | <a href="https://www.genecards.org/cgi-bin/carddisp.pl?gene=CAPN2">https://www.genecards.org/cgi-bin/carddisp.pl?gene=CAPN2</a>         |
| HOXD9     | Homeobox D9                                            | Protein Coding | 40 | GC02P176122 | 2.128438 | <a href="https://www.genecards.org/cgi-bin/carddisp.pl?gene=HOXD9">https://www.genecards.org/cgi-bin/carddisp.pl?gene=HOXD9</a>         |
| MKNK1     | MAPK Interacting Serine/Threonine Kinase 1             | Protein Coding | 45 | GC01M046557 | 2.127274 | <a href="https://www.genecards.org/cgi-bin/carddisp.pl?gene=MKNK1">https://www.genecards.org/cgi-bin/carddisp.pl?gene=MKNK1</a>         |
| TP63      | Tumor Protein P63                                      | Protein Coding | 46 | GC03P189598 | 2.124065 | <a href="https://www.genecards.org/cgi-bin/carddisp.pl?gene=TP63">https://www.genecards.org/cgi-bin/carddisp.pl?gene=TP63</a>           |
| PSMA6     | Proteasome 20S Subunit Alpha 6                         | Protein Coding | 44 | GC14P035278 | 2.119048 | <a href="https://www.genecards.org/cgi-bin/carddisp.pl?gene=PSMA6">https://www.genecards.org/cgi-bin/carddisp.pl?gene=PSMA6</a>         |
| EPRS1     | Glutamyl-Prolyl-TRNA Synthetase 1                      | Protein Coding | 35 | GC01M219969 | 2.118319 | <a href="https://www.genecards.org/cgi-bin/carddisp.pl?gene=EPRS1">https://www.genecards.org/cgi-bin/carddisp.pl?gene=EPRS1</a>         |
| PRKN      | Parkin RBR E3 Ubiquitin Protein Ligase                 | Protein Coding | 37 | GC06M161348 | 2.1134   | <a href="https://www.genecards.org/cgi-bin/carddisp.pl?gene=PRKN">https://www.genecards.org/cgi-bin/carddisp.pl?gene=PRKN</a>           |
| PRKAA1    | Protein Kinase AMP-Activated Catalytic Subunit Alpha 1 | Protein Coding | 45 | GC05M040759 | 2.113122 | <a href="https://www.genecards.org/cgi-bin/carddisp.pl?gene=PRKAA1">https://www.genecards.org/cgi-bin/carddisp.pl?gene=PRKAA1</a>       |

|          |                                                                                       |                |    |              |          |                                                                                                                                       |
|----------|---------------------------------------------------------------------------------------|----------------|----|--------------|----------|---------------------------------------------------------------------------------------------------------------------------------------|
| REL-DT   | REL Divergent Transcript                                                              | RNA Gene       | 13 | GC02M060822  | 2.112596 | <a href="https://www.genecards.org/cgi-bin/carddisp.pl?gene=REL-DT">https://www.genecards.org/cgi-bin/carddisp.pl?gene=REL-DT</a>     |
| RPL21P33 | Ribosomal Protein L21 Pseudogene 33                                                   | Pseudo gene    | 8  | GC02P060852  | 2.112596 | <a href="https://www.genecards.org/cgi-bin/carddisp.pl?gene=RPL21P33">https://www.genecards.org/cgi-bin/carddisp.pl?gene=RPL21P33</a> |
| HEXD     | Hexosaminidase D                                                                      | Protein Coding | 25 | GC17P082419  | 2.111394 | <a href="https://www.genecards.org/cgi-bin/carddisp.pl?gene=HEXD">https://www.genecards.org/cgi-bin/carddisp.pl?gene=HEXD</a>         |
| PLEK     | Pleckstrin                                                                            | Protein Coding | 39 | GC02P068365  | 2.109304 | <a href="https://www.genecards.org/cgi-bin/carddisp.pl?gene=PLEK">https://www.genecards.org/cgi-bin/carddisp.pl?gene=PLEK</a>         |
| PSME3    | Proteasome Activator Subunit 3                                                        | Protein Coding | 40 | GC17P042824  | 2.107673 | <a href="https://www.genecards.org/cgi-bin/carddisp.pl?gene=PSME3">https://www.genecards.org/cgi-bin/carddisp.pl?gene=PSME3</a>       |
| HNRNPD L | Heterogeneous Nuclear Ribonucleoprotein D Like                                        | Protein Coding | 40 | GC04M082422  | 2.105206 | <a href="https://www.genecards.org/cgi-bin/carddisp.pl?gene=HNRNPDL">https://www.genecards.org/cgi-bin/carddisp.pl?gene=HNRNPDL</a>   |
| SEMA4A   | Semaphorin 4A                                                                         | Protein Coding | 43 | GC01P156147  | 2.105062 | <a href="https://www.genecards.org/cgi-bin/carddisp.pl?gene=SEMA4A">https://www.genecards.org/cgi-bin/carddisp.pl?gene=SEMA4A</a>     |
| PROK2    | Prokineticin 2                                                                        | Protein Coding | 42 | GC03M071771  | 2.10484  | <a href="https://www.genecards.org/cgi-bin/carddisp.pl?gene=PROK2">https://www.genecards.org/cgi-bin/carddisp.pl?gene=PROK2</a>       |
| F8       | Coagulation Factor VIII                                                               | Protein Coding | 45 | GC0X M154835 | 2.101871 | <a href="https://www.genecards.org/cgi-bin/carddisp.pl?gene=F8">https://www.genecards.org/cgi-bin/carddisp.pl?gene=F8</a>             |
| SETD2    | SET Domain Containing 2, Histone Lysine Methyltransferase                             | Protein Coding | 45 | GC03M047033  | 2.099041 | <a href="https://www.genecards.org/cgi-bin/carddisp.pl?gene=SETD2">https://www.genecards.org/cgi-bin/carddisp.pl?gene=SETD2</a>       |
| AMBP     | Alpha-1-Microglobulin/Bikunin Precursor                                               | Protein Coding | 42 | GC09M114060  | 2.097699 | <a href="https://www.genecards.org/cgi-bin/carddisp.pl?gene=AMBP">https://www.genecards.org/cgi-bin/carddisp.pl?gene=AMBP</a>         |
| MIR15A   | MicroRNA 15a                                                                          | RNA Gene       | 17 | GC13M050049  | 2.094632 | <a href="https://www.genecards.org/cgi-bin/carddisp.pl?gene=MIR15A">https://www.genecards.org/cgi-bin/carddisp.pl?gene=MIR15A</a>     |
| KIR2DS3  | Killer Cell Immunoglobulin Like Receptor, Two Ig Domains And Short Cytoplasmic Tail 3 | Protein Coding | 24 | GC19M E00037 | 2.093691 | <a href="https://www.genecards.org/cgi-bin/carddisp.pl?gene=KIR2DS3">https://www.genecards.org/cgi-bin/carddisp.pl?gene=KIR2DS3</a>   |

|              |                                                                                         |                |    |              |           |                                                                                                                                               |
|--------------|-----------------------------------------------------------------------------------------|----------------|----|--------------|-----------|-----------------------------------------------------------------------------------------------------------------------------------------------|
| KIR3DS1      | Killer Cell Immunoglobulin Like Receptor, Three Ig Domains And Short Cytoplasmic Tail 1 | Protein Coding | 24 | GC19M R00058 | 2.093 691 | <a href="https://www.genecards.org/cgi-bin/carddisp.pl?gene=KIR3DS1">https://www.genecards.org/cgi-bin/carddisp.pl?gene=KIR3DS1</a>           |
| SEC61A1      | SEC61 Translocon Subunit Alpha 1                                                        | Protein Coding | 41 | GC03P 128051 | 2.091 11  | <a href="https://www.genecards.org/cgi-bin/carddisp.pl?gene=SEC61A1">https://www.genecards.org/cgi-bin/carddisp.pl?gene=SEC61A1</a>           |
| HLA-DRB6     | Major Histocompatibility Complex, Class II, DR Beta 6 (Pseudogene)                      | Pseudo gene    | 16 | GC06M 066005 | 2.090 073 | <a href="https://www.genecards.org/cgi-bin/carddisp.pl?gene=HLA-DRB6">https://www.genecards.org/cgi-bin/carddisp.pl?gene=HLA-DRB6</a>         |
| HLA-DQB1-AS1 | HLA-DQB1 Antisense RNA 1                                                                | RNA Gene       | 13 | GC06P 032659 | 2.090 073 | <a href="https://www.genecards.org/cgi-bin/carddisp.pl?gene=HLA-DQB1-AS1">https://www.genecards.org/cgi-bin/carddisp.pl?gene=HLA-DQB1-AS1</a> |
| FBL          | Fibrillarin                                                                             | Protein Coding | 41 | GC19M 039834 | 2.081 807 | <a href="https://www.genecards.org/cgi-bin/carddisp.pl?gene=FBL">https://www.genecards.org/cgi-bin/carddisp.pl?gene=FBL</a>                   |
| ILF3         | Interleukin Enhancer Binding Factor 3                                                   | Protein Coding | 38 | GC19P 010655 | 2.080 433 | <a href="https://www.genecards.org/cgi-bin/carddisp.pl?gene=ILF3">https://www.genecards.org/cgi-bin/carddisp.pl?gene=ILF3</a>                 |
| HSPB1        | Heat Shock Protein Family B (Small) Member 1                                            | Protein Coding | 49 | GC07P 076302 | 2.078 754 | <a href="https://www.genecards.org/cgi-bin/carddisp.pl?gene=HSPB1">https://www.genecards.org/cgi-bin/carddisp.pl?gene=HSPB1</a>               |
| ACKR1        | Atypical Chemokine Receptor 1 (Duffy Blood Group)                                       | Protein Coding | 36 | GC01P 159203 | 2.074 645 | <a href="https://www.genecards.org/cgi-bin/carddisp.pl?gene=ACKR1">https://www.genecards.org/cgi-bin/carddisp.pl?gene=ACKR1</a>               |
| IFNAR1       | Interferon Alpha And Beta Receptor Subunit 1                                            | Protein Coding | 44 | GC21P 033324 | 2.073 772 | <a href="https://www.genecards.org/cgi-bin/carddisp.pl?gene=IFNAR1">https://www.genecards.org/cgi-bin/carddisp.pl?gene=IFNAR1</a>             |
| CD9          | CD9 Molecule                                                                            | Protein Coding | 41 | GC12P 021026 | 2.073 496 | <a href="https://www.genecards.org/cgi-bin/carddisp.pl?gene=CD9">https://www.genecards.org/cgi-bin/carddisp.pl?gene=CD9</a>                   |
| ANGPTL2      | Angiopoietin Like 2                                                                     | Protein Coding | 37 | GC09M 127087 | 2.072 181 | <a href="https://www.genecards.org/cgi-bin/carddisp.pl?gene=ANGPTL2">https://www.genecards.org/cgi-bin/carddisp.pl?gene=ANGPTL2</a>           |
| ABCG5        | ATP Binding Cassette Subfamily G Member 5                                               | Protein Coding | 44 | GC02M 043806 | 2.070 686 | <a href="https://www.genecards.org/cgi-bin/carddisp.pl?gene=ABCG5">https://www.genecards.org/cgi-bin/carddisp.pl?gene=ABCG5</a>               |
| DSG1         | Desmoglein 1                                                                            | Protein Coding | 42 | GC18P 031318 | 2.069 865 | <a href="https://www.genecards.org/cgi-bin/carddisp.pl?gene=DSG1">https://www.genecards.org/cgi-bin/carddisp.pl?gene=DSG1</a>                 |



|          |                                                                 |                |    |             |          |                                                                                                                                       |
|----------|-----------------------------------------------------------------|----------------|----|-------------|----------|---------------------------------------------------------------------------------------------------------------------------------------|
| KRAS     | KRAS Proto-Oncogene, GTPase                                     | Protein Coding | 49 | GC12M025204 | 2.069338 | <a href="https://www.genecards.org/cgi-bin/carddisp.pl?gene=KRAS">https://www.genecards.org/cgi-bin/carddisp.pl?gene=KRAS</a>         |
| MRPL28   | Mitochondrial Ribosomal Protein L28                             | Protein Coding | 36 | GC16M000366 | 2.068802 | <a href="https://www.genecards.org/cgi-bin/carddisp.pl?gene=MRPL28">https://www.genecards.org/cgi-bin/carddisp.pl?gene=MRPL28</a>     |
| CYP3A5   | Cytochrome P450 Family 3 Subfamily A Member 5                   | Protein Coding | 45 | GC07M099648 | 2.068704 | <a href="https://www.genecards.org/cgi-bin/carddisp.pl?gene=CYP3A5">https://www.genecards.org/cgi-bin/carddisp.pl?gene=CYP3A5</a>     |
| LAT      | Linker For Activation Of T Cells                                | Protein Coding | 44 | GC16P040930 | 2.068704 | <a href="https://www.genecards.org/cgi-bin/carddisp.pl?gene=LAT">https://www.genecards.org/cgi-bin/carddisp.pl?gene=LAT</a>           |
| PTPN13   | Protein Tyrosine Phosphatase Non-Receptor Type 13               | Protein Coding | 42 | GC04P086594 | 2.068704 | <a href="https://www.genecards.org/cgi-bin/carddisp.pl?gene=PTPN13">https://www.genecards.org/cgi-bin/carddisp.pl?gene=PTPN13</a>     |
| ACD      | ACD Shelterin Complex Subunit And Telomerase Recruitment Factor | Protein Coding | 41 | GC16M067658 | 2.068704 | <a href="https://www.genecards.org/cgi-bin/carddisp.pl?gene=ACD">https://www.genecards.org/cgi-bin/carddisp.pl?gene=ACD</a>           |
| SERPINA7 | Serpin Family A Member 7                                        | Protein Coding | 40 | GC0XM106032 | 2.068704 | <a href="https://www.genecards.org/cgi-bin/carddisp.pl?gene=SERPINA7">https://www.genecards.org/cgi-bin/carddisp.pl?gene=SERPINA7</a> |
| VIPR2    | Vasoactive Intestinal Peptide Receptor 2                        | Protein Coding | 42 | GC07M159028 | 2.067124 | <a href="https://www.genecards.org/cgi-bin/carddisp.pl?gene=VIPR2">https://www.genecards.org/cgi-bin/carddisp.pl?gene=VIPR2</a>       |
| CCN4     | Cellular Communication Network Factor 4                         | Protein Coding | 30 | GC08P133192 | 2.066181 | <a href="https://www.genecards.org/cgi-bin/carddisp.pl?gene=CCN4">https://www.genecards.org/cgi-bin/carddisp.pl?gene=CCN4</a>         |
| ADAMTS13 | ADAM Metallopeptidase With Thrombospondin Type 1 Motif 13       | Protein Coding | 47 | GC09P133414 | 2.062452 | <a href="https://www.genecards.org/cgi-bin/carddisp.pl?gene=ADAMTS13">https://www.genecards.org/cgi-bin/carddisp.pl?gene=ADAMTS13</a> |
| DSG3     | Desmoglein 3                                                    | Protein Coding | 40 | GC18P031447 | 2.055178 | <a href="https://www.genecards.org/cgi-bin/carddisp.pl?gene=DSG3">https://www.genecards.org/cgi-bin/carddisp.pl?gene=DSG3</a>         |
| CD6      | CD6 Molecule                                                    | Protein Coding | 41 | GC11P060971 | 2.053894 | <a href="https://www.genecards.org/cgi-bin/carddisp.pl?gene=CD6">https://www.genecards.org/cgi-bin/carddisp.pl?gene=CD6</a>           |
| PADI3    | Peptidyl Arginine Deiminase 3                                   | Protein Coding | 40 | GC01P017249 | 2.053202 | <a href="https://www.genecards.org/cgi-bin/carddisp.pl?gene=PADI3">https://www.genecards.org/cgi-bin/carddisp.pl?gene=PADI3</a>       |
| MIR155HG | MIR155 Host Gene                                                | RNA Gene       | 22 | GC21P025589 | 2.052902 | <a href="https://www.genecards.org/cgi-">https://www.genecards.org/cgi-</a>                                                           |

|          |                                                |                |    |             |          |                                                                                                                                         |
|----------|------------------------------------------------|----------------|----|-------------|----------|-----------------------------------------------------------------------------------------------------------------------------------------|
|          |                                                |                |    |             |          | <a href="http://www.ncbi.nlm.nih.gov/ncbi/cgibin/cddisp.pl?gene=MIR155HG">bin/cddisp.pl?gene=MIR155HG</a>                               |
| DNMT3B   | DNA Methyltransferase 3 Beta                   | Protein Coding | 49 | GC20P032762 | 2.052171 | <a href="http://www.ncbi.nlm.nih.gov/ncbi/cgibin/cddisp.pl?gene=DNMT3B">https://www.genecards.org/cgi-bin/cddisp.pl?gene=DNMT3B</a>     |
| TFF2     | Trefoil Factor 2                               | Protein Coding | 40 | GC21M042346 | 2.048805 | <a href="http://www.ncbi.nlm.nih.gov/ncbi/cgibin/cddisp.pl?gene=TFF2">https://www.genecards.org/cgi-bin/cddisp.pl?gene=TFF2</a>         |
| PPARGC1B | PPARG Coactivator 1 Beta                       | Protein Coding | 34 | GC05P149730 | 2.048602 | <a href="http://www.ncbi.nlm.nih.gov/ncbi/cgibin/cddisp.pl?gene=PPARGC1B">https://www.genecards.org/cgi-bin/cddisp.pl?gene=PPARGC1B</a> |
| F2RL2    | Coagulation Factor II Thrombin Receptor Like 2 | Protein Coding | 40 | GC05M076615 | 2.047254 | <a href="http://www.ncbi.nlm.nih.gov/ncbi/cgibin/cddisp.pl?gene=F2RL2">https://www.genecards.org/cgi-bin/cddisp.pl?gene=F2RL2</a>       |
| SLC25A28 | Solute Carrier Family 25 Member 28             | Protein Coding | 37 | GC10M099610 | 2.045891 | <a href="http://www.ncbi.nlm.nih.gov/ncbi/cgibin/cddisp.pl?gene=SLC25A28">https://www.genecards.org/cgi-bin/cddisp.pl?gene=SLC25A28</a> |
| CXCL6    | C-X-C Motif Chemokine Ligand 6                 | Protein Coding | 38 | GC04P073837 | 2.044777 | <a href="http://www.ncbi.nlm.nih.gov/ncbi/cgibin/cddisp.pl?gene=CXCL6">https://www.genecards.org/cgi-bin/cddisp.pl?gene=CXCL6</a>       |
| PGLYRP1  | Peptidoglycan Recognition Protein 1            | Protein Coding | 40 | GC19M065951 | 2.043633 | <a href="http://www.ncbi.nlm.nih.gov/ncbi/cgibin/cddisp.pl?gene=PGLYRP1">https://www.genecards.org/cgi-bin/cddisp.pl?gene=PGLYRP1</a>   |
| RUNX3    | RUNX Family Transcription Factor 3             | Protein Coding | 42 | GC01M024899 | 2.04232  | <a href="http://www.ncbi.nlm.nih.gov/ncbi/cgibin/cddisp.pl?gene=RUNX3">https://www.genecards.org/cgi-bin/cddisp.pl?gene=RUNX3</a>       |
| ITCH     | Itchy E3 Ubiquitin Protein Ligase              | Protein Coding | 44 | GC20P034363 | 2.042234 | <a href="http://www.ncbi.nlm.nih.gov/ncbi/cgibin/cddisp.pl?gene=ITCH">https://www.genecards.org/cgi-bin/cddisp.pl?gene=ITCH</a>         |
| SEMA7A   | Semaphorin 7A (John Milton Hagen Blood Group)  | Protein Coding | 42 | GC15M074409 | 2.038297 | <a href="http://www.ncbi.nlm.nih.gov/ncbi/cgibin/cddisp.pl?gene=SEMA7A">https://www.genecards.org/cgi-bin/cddisp.pl?gene=SEMA7A</a>     |
| SIGIRR   | Single Ig And TIR Domain Containing            | Protein Coding | 39 | GC11M003183 | 2.038297 | <a href="http://www.ncbi.nlm.nih.gov/ncbi/cgibin/cddisp.pl?gene=SIGIRR">https://www.genecards.org/cgi-bin/cddisp.pl?gene=SIGIRR</a>     |
| BIRC3    | Baculoviral IAP Repeat Containing 3            | Protein Coding | 45 | GC11P102317 | 2.033995 | <a href="http://www.ncbi.nlm.nih.gov/ncbi/cgibin/cddisp.pl?gene=BIRC3">https://www.genecards.org/cgi-bin/cddisp.pl?gene=BIRC3</a>       |
| ING4     | Inhibitor Of Growth Family Member 4            | Protein Coding | 36 | GC12M006650 | 2.033898 | <a href="http://www.ncbi.nlm.nih.gov/ncbi/cgibin/cddisp.pl?gene=ING4">https://www.genecards.org/cgi-bin/cddisp.pl?gene=ING4</a>         |

|        |                                                     |                |    |             |          |                                                                                                                                     |
|--------|-----------------------------------------------------|----------------|----|-------------|----------|-------------------------------------------------------------------------------------------------------------------------------------|
| LDLR   | Low Density Lipoprotein Receptor                    | Protein Coding | 49 | GC19P011091 | 2.031577 | <a href="https://www.genecards.org/cgi-bin/carddisp.pl?gene=LDLR">https://www.genecards.org/cgi-bin/carddisp.pl?gene=LDLR</a>       |
| EPAS1  | Endothelial PAS Domain Protein 1                    | Protein Coding | 48 | GC02P046293 | 2.031577 | <a href="https://www.genecards.org/cgi-bin/carddisp.pl?gene=EPAS1">https://www.genecards.org/cgi-bin/carddisp.pl?gene=EPAS1</a>     |
| CD3G   | CD3 Gamma Subunit Of T-Cell Receptor Complex        | Protein Coding | 45 | GC11P118344 | 2.031577 | <a href="https://www.genecards.org/cgi-bin/carddisp.pl?gene=CD3G">https://www.genecards.org/cgi-bin/carddisp.pl?gene=CD3G</a>       |
| AGFG1  | ArfGAP With FG Repeats 1                            | Protein Coding | 39 | GC02P227473 | 2.031577 | <a href="https://www.genecards.org/cgi-bin/carddisp.pl?gene=AGFG1">https://www.genecards.org/cgi-bin/carddisp.pl?gene=AGFG1</a>     |
| MIR650 | MicroRNA 650                                        | RNA Gene       | 13 | GC22P022822 | 2.031577 | <a href="https://www.genecards.org/cgi-bin/carddisp.pl?gene=MIR650">https://www.genecards.org/cgi-bin/carddisp.pl?gene=MIR650</a>   |
| IGLV@  | Immunoglobulin Lambda Variable Cluster              | Gene Cluster   | 8  | GC22U990033 | 2.031577 | <a href="https://www.genecards.org/cgi-bin/carddisp.pl?gene=IGLV%40">https://www.genecards.org/cgi-bin/carddisp.pl?gene=IGLV%40</a> |
| FGFR4  | Fibroblast Growth Factor Receptor 4                 | Protein Coding | 49 | GC05P177086 | 2.031178 | <a href="https://www.genecards.org/cgi-bin/carddisp.pl?gene=FGFR4">https://www.genecards.org/cgi-bin/carddisp.pl?gene=FGFR4</a>     |
| LZTR1  | Leucine Zipper Like Transcription Regulator 1       | Protein Coding | 42 | GC22P035893 | 2.030736 | <a href="https://www.genecards.org/cgi-bin/carddisp.pl?gene=LZTR1">https://www.genecards.org/cgi-bin/carddisp.pl?gene=LZTR1</a>     |
| TOP3B  | DNA Topoisomerase III Beta                          | Protein Coding | 40 | GC22M021957 | 2.030736 | <a href="https://www.genecards.org/cgi-bin/carddisp.pl?gene=TOP3B">https://www.genecards.org/cgi-bin/carddisp.pl?gene=TOP3B</a>     |
| THAP7  | THAP Domain Containing 7                            | Protein Coding | 32 | GC22M020999 | 2.030736 | <a href="https://www.genecards.org/cgi-bin/carddisp.pl?gene=THAP7">https://www.genecards.org/cgi-bin/carddisp.pl?gene=THAP7</a>     |
| CAPZB  | Capping Actin Protein Of Muscle Z-Line Subunit Beta | Protein Coding | 40 | GC01M019339 | 2.029269 | <a href="https://www.genecards.org/cgi-bin/carddisp.pl?gene=CAPZB">https://www.genecards.org/cgi-bin/carddisp.pl?gene=CAPZB</a>     |
| PTGER1 | Prostaglandin E Receptor 1                          | Protein Coding | 40 | GC19M014515 | 2.028983 | <a href="https://www.genecards.org/cgi-bin/carddisp.pl?gene=PTGER1">https://www.genecards.org/cgi-bin/carddisp.pl?gene=PTGER1</a>   |
| MAP3K3 | Mitogen-Activated Protein Kinase Kinase Kinase 3    | Protein Coding | 45 | GC17P063622 | 2.027966 | <a href="https://www.genecards.org/cgi-bin/carddisp.pl?gene=MAP3K3">https://www.genecards.org/cgi-bin/carddisp.pl?gene=MAP3K3</a>   |
| SH2D2A | SH2 Domain Containing 2A                            | Protein Coding | 38 | GC01M156917 | 2.026004 | <a href="https://www.genecards.org/cgi-">https://www.genecards.org/cgi-</a>                                                         |

|         |                                                                   |                |    |             |          |                                                                                                                                   |
|---------|-------------------------------------------------------------------|----------------|----|-------------|----------|-----------------------------------------------------------------------------------------------------------------------------------|
|         |                                                                   |                |    |             |          | <a href="http://bin/caddisp.pl?gene=SH2D2A">bin/caddisp.pl?gene=SH2D2A</a>                                                        |
| MAPKAP1 | MAPK Associated Protein 1                                         | Protein Coding | 41 | GC09M125437 | 2.017874 | <a href="https://www.genecards.org/cgi-bin/caddisp.pl?gene=MAPKAP1">https://www.genecards.org/cgi-bin/caddisp.pl?gene=MAPKAP1</a> |
| NEDD9   | Neural Precursor Cell Expressed, Developmentally Down-Regulated 9 | Protein Coding | 41 | GC06M011183 | 2.017874 | <a href="https://www.genecards.org/cgi-bin/caddisp.pl?gene=NEDD9">https://www.genecards.org/cgi-bin/caddisp.pl?gene=NEDD9</a>     |
| CAMLG   | Calcium Modulating Ligand                                         | Protein Coding | 40 | GC05P134738 | 2.017698 | <a href="https://www.genecards.org/cgi-bin/caddisp.pl?gene=CAMLG">https://www.genecards.org/cgi-bin/caddisp.pl?gene=CAMLG</a>     |
| CNMD    | Chondromodulin                                                    | Protein Coding | 29 | GC13M052704 | 2.014921 | <a href="https://www.genecards.org/cgi-bin/caddisp.pl?gene=CNMD">https://www.genecards.org/cgi-bin/caddisp.pl?gene=CNMD</a>       |
| SOX5    | SRY-Box Transcription Factor 5                                    | Protein Coding | 44 | GC12M023529 | 2.014562 | <a href="https://www.genecards.org/cgi-bin/caddisp.pl?gene=SOX5">https://www.genecards.org/cgi-bin/caddisp.pl?gene=SOX5</a>       |
| TPI1    | Triosephosphate Isomerase 1                                       | Protein Coding | 45 | GC12P006867 | 2.010789 | <a href="https://www.genecards.org/cgi-bin/caddisp.pl?gene=TPI1">https://www.genecards.org/cgi-bin/caddisp.pl?gene=TPI1</a>       |
| BRCA2   | BRCA2 DNA Repair Associated                                       | Protein Coding | 46 | GC13P032315 | 2.010146 | <a href="https://www.genecards.org/cgi-bin/caddisp.pl?gene=BRCA2">https://www.genecards.org/cgi-bin/caddisp.pl?gene=BRCA2</a>     |
| IGFBP2  | Insulin Like Growth Factor Binding Protein 2                      | Protein Coding | 42 | GC02P216632 | 2.007969 | <a href="https://www.genecards.org/cgi-bin/caddisp.pl?gene=IGFBP2">https://www.genecards.org/cgi-bin/caddisp.pl?gene=IGFBP2</a>   |
| MYOM2   | Myomesin 2                                                        | Protein Coding | 37 | GC08P002045 | 2.007447 | <a href="https://www.genecards.org/cgi-bin/caddisp.pl?gene=MYOM2">https://www.genecards.org/cgi-bin/caddisp.pl?gene=MYOM2</a>     |
| MCAM    | Melanoma Cell Adhesion Molecule                                   | Protein Coding | 41 | GC11M119308 | 2.006366 | <a href="https://www.genecards.org/cgi-bin/caddisp.pl?gene=MCAM">https://www.genecards.org/cgi-bin/caddisp.pl?gene=MCAM</a>       |
| RBP3    | Retinol Binding Protein 3                                         | Protein Coding | 41 | GC10P047348 | 2.001217 | <a href="https://www.genecards.org/cgi-bin/caddisp.pl?gene=RBP3">https://www.genecards.org/cgi-bin/caddisp.pl?gene=RBP3</a>       |
| SNRPD1  | Small Nuclear Ribonucleoprotein D1 Polypeptide                    | Protein Coding | 37 | GC18P021612 | 1.999572 | <a href="https://www.genecards.org/cgi-bin/caddisp.pl?gene=SNRPD1">https://www.genecards.org/cgi-bin/caddisp.pl?gene=SNRPD1</a>   |
| ACTN1   | Actinin Alpha 1                                                   | Protein Coding | 47 | GC14M068874 | 1.999129 | <a href="https://www.genecards.org/cgi-bin/caddisp.pl?gene=ACTN1">https://www.genecards.org/cgi-bin/caddisp.pl?gene=ACTN1</a>     |

|          |                                                                        |                |    |             |          |                                                                                                                                       |
|----------|------------------------------------------------------------------------|----------------|----|-------------|----------|---------------------------------------------------------------------------------------------------------------------------------------|
| NKX2-3   | NK2 Homeobox 3                                                         | Protein Coding | 38 | GC10P099532 | 1.996514 | <a href="https://www.genecards.org/cgi-bin/carddisp.pl?gene=NKX2-3">https://www.genecards.org/cgi-bin/carddisp.pl?gene=NKX2-3</a>     |
| HRAS     | HRas Proto-Oncogene, GTPase                                            | Protein Coding | 50 | GC11M003189 | 1.995996 | <a href="https://www.genecards.org/cgi-bin/carddisp.pl?gene=HRAS">https://www.genecards.org/cgi-bin/carddisp.pl?gene=HRAS</a>         |
| MIR29A   | MicroRNA 29a                                                           | RNA Gene       | 22 | GC07M130876 | 1.995667 | <a href="https://www.genecards.org/cgi-bin/carddisp.pl?gene=MIR29A">https://www.genecards.org/cgi-bin/carddisp.pl?gene=MIR29A</a>     |
| GRB2     | Growth Factor Receptor Bound Protein 2                                 | Protein Coding | 45 | GC17M075318 | 1.9938   | <a href="https://www.genecards.org/cgi-bin/carddisp.pl?gene=GRB2">https://www.genecards.org/cgi-bin/carddisp.pl?gene=GRB2</a>         |
| THBS2    | Thrombospondin 2                                                       | Protein Coding | 44 | GC06M169215 | 1.993781 | <a href="https://www.genecards.org/cgi-bin/carddisp.pl?gene=THBS2">https://www.genecards.org/cgi-bin/carddisp.pl?gene=THBS2</a>       |
| MIR590   | MicroRNA 590                                                           | RNA Gene       | 20 | GC07P074191 | 1.993555 | <a href="https://www.genecards.org/cgi-bin/carddisp.pl?gene=MIR590">https://www.genecards.org/cgi-bin/carddisp.pl?gene=MIR590</a>     |
| CHD4     | Chromodomain Helicase DNA Binding Protein 4                            | Protein Coding | 43 | GC12M006570 | 1.993327 | <a href="https://www.genecards.org/cgi-bin/carddisp.pl?gene=CHD4">https://www.genecards.org/cgi-bin/carddisp.pl?gene=CHD4</a>         |
| MIR106A  | MicroRNA 106a                                                          | RNA Gene       | 20 | GC0XM134313 | 1.991832 | <a href="https://www.genecards.org/cgi-bin/carddisp.pl?gene=MIR106A">https://www.genecards.org/cgi-bin/carddisp.pl?gene=MIR106A</a>   |
| MIR192   | MicroRNA 192                                                           | RNA Gene       | 22 | GC11M064891 | 1.989437 | <a href="https://www.genecards.org/cgi-bin/carddisp.pl?gene=MIR192">https://www.genecards.org/cgi-bin/carddisp.pl?gene=MIR192</a>     |
| PIK3CA   | Phosphatidylinositol-4,5-Bisphosphate 3-Kinase Catalytic Subunit Alpha | Protein Coding | 50 | GC03P179148 | 1.987665 | <a href="https://www.genecards.org/cgi-bin/carddisp.pl?gene=PIK3CA">https://www.genecards.org/cgi-bin/carddisp.pl?gene=PIK3CA</a>     |
| HLA-DQB3 | Major Histocompatibility Complex, Class II, DQ Beta 3                  | Protein Coding | 12 | GC06M066018 | 1.986088 | <a href="https://www.genecards.org/cgi-bin/carddisp.pl?gene=HLA-DQB3">https://www.genecards.org/cgi-bin/carddisp.pl?gene=HLA-DQB3</a> |
| MTCO3P1  | MT-CO3 Pseudogene 1                                                    | Pseudo gene    | 8  | GC06M032706 | 1.986088 | <a href="https://www.genecards.org/cgi-bin/carddisp.pl?gene=MTCO3P1">https://www.genecards.org/cgi-bin/carddisp.pl?gene=MTCO3P1</a>   |
| NRXN1    | Neurexin 1                                                             | Protein Coding | 47 | GC02M049918 | 1.984516 | <a href="https://www.genecards.org/cgi-bin/carddisp.pl?gene=NRXN1">https://www.genecards.org/cgi-bin/carddisp.pl?gene=NRXN1</a>       |
| VCL      | Vinculin                                                               | Protein Coding | 45 | GC10P073995 | 1.984516 | <a href="https://www.genecards.org/cgi-bin/carddisp.pl?gene=VCL">https://www.genecards.org/cgi-bin/carddisp.pl?gene=VCL</a>           |

|         |                                                             |                |    |             |          |                                                                                                                                     |
|---------|-------------------------------------------------------------|----------------|----|-------------|----------|-------------------------------------------------------------------------------------------------------------------------------------|
|         |                                                             |                |    |             |          | <a href="#">bin/carddisp.pl?gene=VCL</a>                                                                                            |
| HEXA    | Hexosaminidase Subunit Alpha                                | Protein Coding | 45 | GC15M072340 | 1.984349 | <a href="https://www.genecards.org/cgi-bin/carddisp.pl?gene=HEXA">https://www.genecards.org/cgi-bin/carddisp.pl?gene=HEXA</a>       |
| PCSK9   | Proprotein Convertase Subtilisin/Kexin Type 9               | Protein Coding | 49 | GC01P055039 | 1.983996 | <a href="https://www.genecards.org/cgi-bin/carddisp.pl?gene=PCSK9">https://www.genecards.org/cgi-bin/carddisp.pl?gene=PCSK9</a>     |
| ETFA    | Electron Transfer Flavoprotein Subunit Alpha                | Protein Coding | 44 | GC15M090338 | 1.983996 | <a href="https://www.genecards.org/cgi-bin/carddisp.pl?gene=ETFA">https://www.genecards.org/cgi-bin/carddisp.pl?gene=ETFA</a>       |
| HPSE    | Heparanase                                                  | Protein Coding | 43 | GC04M083292 | 1.983996 | <a href="https://www.genecards.org/cgi-bin/carddisp.pl?gene=HPSE">https://www.genecards.org/cgi-bin/carddisp.pl?gene=HPSE</a>       |
| COPS5   | COP9 Signalosome Subunit 5                                  | Protein Coding | 41 | GC08M067043 | 1.983996 | <a href="https://www.genecards.org/cgi-bin/carddisp.pl?gene=COPS5">https://www.genecards.org/cgi-bin/carddisp.pl?gene=COPS5</a>     |
| QKI     | QKI, KH Domain Containing RNA Binding                       | Protein Coding | 41 | GC06P163414 | 1.983996 | <a href="https://www.genecards.org/cgi-bin/carddisp.pl?gene=QKI">https://www.genecards.org/cgi-bin/carddisp.pl?gene=QKI</a>         |
| MDGA2   | MAM Domain Containing Glycosylphosphatidylinositol Anchor 2 | Protein Coding | 37 | GC14M046839 | 1.983996 | <a href="https://www.genecards.org/cgi-bin/carddisp.pl?gene=MDGA2">https://www.genecards.org/cgi-bin/carddisp.pl?gene=MDGA2</a>     |
| ERV3-1  | Endogenous Retrovirus Group 3 Member 1, Envelope            | Protein Coding | 31 | GC07M065766 | 1.983996 | <a href="https://www.genecards.org/cgi-bin/carddisp.pl?gene=ERV3-1">https://www.genecards.org/cgi-bin/carddisp.pl?gene=ERV3-1</a>   |
| MIR449A | MicroRNA 449a                                               | RNA Gene       | 21 | GC05M055171 | 1.983996 | <a href="https://www.genecards.org/cgi-bin/carddisp.pl?gene=MIR449A">https://www.genecards.org/cgi-bin/carddisp.pl?gene=MIR449A</a> |
| MUTYH   | MutY DNA Glycosylase                                        | Protein Coding | 44 | GC01M045329 | 1.980473 | <a href="https://www.genecards.org/cgi-bin/carddisp.pl?gene=MUTYH">https://www.genecards.org/cgi-bin/carddisp.pl?gene=MUTYH</a>     |
| PIAS3   | Protein Inhibitor Of Activated STAT 3                       | Protein Coding | 39 | GC01M145848 | 1.980473 | <a href="https://www.genecards.org/cgi-bin/carddisp.pl?gene=PIAS3">https://www.genecards.org/cgi-bin/carddisp.pl?gene=PIAS3</a>     |
| SLC2A3  | Solute Carrier Family 2 Member 3                            | Protein Coding | 46 | GC12M007919 | 1.979011 | <a href="https://www.genecards.org/cgi-bin/carddisp.pl?gene=SLC2A3">https://www.genecards.org/cgi-bin/carddisp.pl?gene=SLC2A3</a>   |
| TNFSF9  | TNF Superfamily Member 9                                    | Protein Coding | 35 | GC19P006531 | 1.97866  | <a href="https://www.genecards.org/cgi-bin/carddisp.pl?gene=TNFSF9">https://www.genecards.org/cgi-bin/carddisp.pl?gene=TNFSF9</a>   |

|                |                                                           |                |    |             |          |                                                                                                                                                   |
|----------------|-----------------------------------------------------------|----------------|----|-------------|----------|---------------------------------------------------------------------------------------------------------------------------------------------------|
| MGP            | Matrix Gla Protein                                        | Protein Coding | 41 | GC12M021179 | 1.978456 | <a href="https://www.genecards.org/cgi-bin/carddisp.pl?gene=MGP">https://www.genecards.org/cgi-bin/carddisp.pl?gene=MGP</a>                       |
| ZMIZ1          | Zinc Finger MIZ-Type Containing 1                         | Protein Coding | 41 | GC10P079068 | 1.975965 | <a href="https://www.genecards.org/cgi-bin/carddisp.pl?gene=ZMIZ1">https://www.genecards.org/cgi-bin/carddisp.pl?gene=ZMIZ1</a>                   |
| CD72           | CD72 Molecule                                             | Protein Coding | 38 | GC09M035610 | 1.972569 | <a href="https://www.genecards.org/cgi-bin/carddisp.pl?gene=CD72">https://www.genecards.org/cgi-bin/carddisp.pl?gene=CD72</a>                     |
| CLEC5A         | C-Type Lectin Domain Containing 5A                        | Protein Coding | 34 | GC07M141927 | 1.970131 | <a href="https://www.genecards.org/cgi-bin/carddisp.pl?gene=CLEC5A">https://www.genecards.org/cgi-bin/carddisp.pl?gene=CLEC5A</a>                 |
| SLC29A1        | Solute Carrier Family 29 Member 1 (Augustine Blood Group) | Protein Coding | 46 | GC06P044219 | 1.968774 | <a href="https://www.genecards.org/cgi-bin/carddisp.pl?gene=SLC29A1">https://www.genecards.org/cgi-bin/carddisp.pl?gene=SLC29A1</a>               |
| MIR497         | MicroRNA 497                                              | RNA Gene       | 18 | GC17M007022 | 1.963809 | <a href="https://www.genecards.org/cgi-bin/carddisp.pl?gene=MIR497">https://www.genecards.org/cgi-bin/carddisp.pl?gene=MIR497</a>                 |
| ARNTL          | Aryl Hydrocarbon Receptor Nuclear Translocator Like       | Protein Coding | 40 | GC11P013276 | 1.963676 | <a href="https://www.genecards.org/cgi-bin/carddisp.pl?gene=ARNTL">https://www.genecards.org/cgi-bin/carddisp.pl?gene=ARNTL</a>                   |
| ARG1           | Arginase 1                                                | Protein Coding | 47 | GC06P131473 | 1.963675 | <a href="https://www.genecards.org/cgi-bin/carddisp.pl?gene=ARG1">https://www.genecards.org/cgi-bin/carddisp.pl?gene=ARG1</a>                     |
| SIGLEC9        | Sialic Acid Binding Ig Like Lectin 9                      | Protein Coding | 36 | GC19P067192 | 1.962502 | <a href="https://www.genecards.org/cgi-bin/carddisp.pl?gene=SIGLEC9">https://www.genecards.org/cgi-bin/carddisp.pl?gene=SIGLEC9</a>               |
| POLR3B         | RNA Polymerase III Subunit B                              | Protein Coding | 42 | GC12P106357 | 1.962202 | <a href="https://www.genecards.org/cgi-bin/carddisp.pl?gene=POLR3B">https://www.genecards.org/cgi-bin/carddisp.pl?gene=POLR3B</a>                 |
| RPL36A-HNRNPH2 | RPL36A-HNRNPH2 Readthrough                                | Protein Coding | 17 | GC0XP101390 | 1.960071 | <a href="https://www.genecards.org/cgi-bin/carddisp.pl?gene=RPL36A-HNRNPH2">https://www.genecards.org/cgi-bin/carddisp.pl?gene=RPL36A-HNRNPH2</a> |
| IL11RA         | Interleukin 11 Receptor Subunit Alpha                     | Protein Coding | 44 | GC09P047112 | 1.958033 | <a href="https://www.genecards.org/cgi-bin/carddisp.pl?gene=IL11RA">https://www.genecards.org/cgi-bin/carddisp.pl?gene=IL11RA</a>                 |
| PPIL2          | Peptidylprolyl Isomerase Like 2                           | Protein Coding | 39 | GC22P038720 | 1.957664 | <a href="https://www.genecards.org/cgi-bin/carddisp.pl?gene=PPIL2">https://www.genecards.org/cgi-bin/carddisp.pl?gene=PPIL2</a>                   |
| MIR31          | MicroRNA 31                                               | RNA Gene       | 20 | GC09M021761 | 1.957645 | <a href="https://www.genecards.org/cgi-bin/carddisp.pl?gene=MIR31">https://www.genecards.org/cgi-bin/carddisp.pl?gene=MIR31</a>                   |

|           |                                                        |                |    |             |          |                                                                                                                                                |
|-----------|--------------------------------------------------------|----------------|----|-------------|----------|------------------------------------------------------------------------------------------------------------------------------------------------|
|           |                                                        |                |    |             |          | <a href="http://www.ncbi.nlm.nih.gov/ncbi/cdd/bin/carddisp.pl?gene=MIR31">bin/carddisp.pl?gene=MIR31</a>                                       |
| GIMAP5    | GTPase, IMAP Family Member 5                           | Protein Coding | 38 | GC07P150722 | 1.95636  | <a href="http://www.ncbi.nlm.nih.gov/ncbi/cdd/bin/carddisp.pl?gene=GIMAP5">https://www.genecards.org/cgi-bin/carddisp.pl?gene=GIMAP5</a>       |
| EFNA5     | Ephrin A5                                              | Protein Coding | 42 | GC05M107376 | 1.956268 | <a href="http://www.ncbi.nlm.nih.gov/ncbi/cdd/bin/carddisp.pl?gene=EFNA5">https://www.genecards.org/cgi-bin/carddisp.pl?gene=EFNA5</a>         |
| SOCS6     | Suppressor Of Cytokine Signaling 6                     | Protein Coding | 40 | GC18P070288 | 1.956268 | <a href="http://www.ncbi.nlm.nih.gov/ncbi/cdd/bin/carddisp.pl?gene=SOCS6">https://www.genecards.org/cgi-bin/carddisp.pl?gene=SOCS6</a>         |
| LINC00638 | Long Intergenic Non-Protein Coding RNA 638             | RNA Gene       | 14 | GC14P109735 | 1.956268 | <a href="http://www.ncbi.nlm.nih.gov/ncbi/cdd/bin/carddisp.pl?gene=LINC00638">https://www.genecards.org/cgi-bin/carddisp.pl?gene=LINC00638</a> |
| ALDOA     | Aldolase, Fructose-Bisphosphate A                      | Protein Coding | 46 | GC16P030064 | 1.955285 | <a href="http://www.ncbi.nlm.nih.gov/ncbi/cdd/bin/carddisp.pl?gene=ALDOA">https://www.genecards.org/cgi-bin/carddisp.pl?gene=ALDOA</a>         |
| CASP4     | Caspase 4                                              | Protein Coding | 45 | GC11M104942 | 1.955285 | <a href="http://www.ncbi.nlm.nih.gov/ncbi/cdd/bin/carddisp.pl?gene=CASP4">https://www.genecards.org/cgi-bin/carddisp.pl?gene=CASP4</a>         |
| NR1H3     | Nuclear Receptor Subfamily 1 Group H Member 3          | Protein Coding | 45 | GC11P047248 | 1.955285 | <a href="http://www.ncbi.nlm.nih.gov/ncbi/cdd/bin/carddisp.pl?gene=NR1H3">https://www.genecards.org/cgi-bin/carddisp.pl?gene=NR1H3</a>         |
| MDM4      | MDM4 Regulator Of P53                                  | Protein Coding | 43 | GC01P204516 | 1.955285 | <a href="http://www.ncbi.nlm.nih.gov/ncbi/cdd/bin/carddisp.pl?gene=MDM4">https://www.genecards.org/cgi-bin/carddisp.pl?gene=MDM4</a>           |
| DAXX      | Death Domain Associated Protein                        | Protein Coding | 41 | GC06M033318 | 1.955285 | <a href="http://www.ncbi.nlm.nih.gov/ncbi/cdd/bin/carddisp.pl?gene=DAXX">https://www.genecards.org/cgi-bin/carddisp.pl?gene=DAXX</a>           |
| C1QTNF6   | C1q And TNF Related 6                                  | Protein Coding | 37 | GC22M037180 | 1.950598 | <a href="http://www.ncbi.nlm.nih.gov/ncbi/cdd/bin/carddisp.pl?gene=C1QTNF6">https://www.genecards.org/cgi-bin/carddisp.pl?gene=C1QTNF6</a>     |
| JUNB      | JunB Proto-Oncogene, AP-1 Transcription Factor Subunit | Protein Coding | 40 | GC19P012791 | 1.947224 | <a href="http://www.ncbi.nlm.nih.gov/ncbi/cdd/bin/carddisp.pl?gene=JUNB">https://www.genecards.org/cgi-bin/carddisp.pl?gene=JUNB</a>           |
| BID       | BH3 Interacting Domain Death Agonist                   | Protein Coding | 42 | GC22M017734 | 1.946494 | <a href="http://www.ncbi.nlm.nih.gov/ncbi/cdd/bin/carddisp.pl?gene=BID">https://www.genecards.org/cgi-bin/carddisp.pl?gene=BID</a>             |
| CD52      | CD52 Molecule                                          | Protein Coding | 37 | GC01P026317 | 1.944578 | <a href="http://www.ncbi.nlm.nih.gov/ncbi/cdd/bin/carddisp.pl?gene=CD52">https://www.genecards.org/cgi-bin/carddisp.pl?gene=CD52</a>           |



|        |                                                          |                |    |             |          |                                                                                                                                   |
|--------|----------------------------------------------------------|----------------|----|-------------|----------|-----------------------------------------------------------------------------------------------------------------------------------|
| NTRK2  | Neurotrophic Receptor Tyrosine Kinase 2                  | Protein Coding | 51 | GC09P084668 | 1.94275  | <a href="https://www.genecards.org/cgi-bin/carddisp.pl?gene=NTRK2">https://www.genecards.org/cgi-bin/carddisp.pl?gene=NTRK2</a>   |
| METAP2 | Methionyl Aminopeptidase 2                               | Protein Coding | 44 | GC12P095473 | 1.942644 | <a href="https://www.genecards.org/cgi-bin/carddisp.pl?gene=METAP2">https://www.genecards.org/cgi-bin/carddisp.pl?gene=METAP2</a> |
| HRH1   | Histamine Receptor H1                                    | Protein Coding | 44 | GC03P012473 | 1.937509 | <a href="https://www.genecards.org/cgi-bin/carddisp.pl?gene=HRH1">https://www.genecards.org/cgi-bin/carddisp.pl?gene=HRH1</a>     |
| VASH1  | Vasohibin 1                                              | Protein Coding | 36 | GC14P076761 | 1.929318 | <a href="https://www.genecards.org/cgi-bin/carddisp.pl?gene=VASH1">https://www.genecards.org/cgi-bin/carddisp.pl?gene=VASH1</a>   |
| PAH    | Phenylalanine Hydroxylase                                | Protein Coding | 46 | GC12M102836 | 1.928018 | <a href="https://www.genecards.org/cgi-bin/carddisp.pl?gene=PAH">https://www.genecards.org/cgi-bin/carddisp.pl?gene=PAH</a>       |
| SNRPN  | Small Nuclear Ribonucleoprotein Polypeptide N            | Protein Coding | 42 | GC15P024823 | 1.928018 | <a href="https://www.genecards.org/cgi-bin/carddisp.pl?gene=SNRPN">https://www.genecards.org/cgi-bin/carddisp.pl?gene=SNRPN</a>   |
| PLK1   | Polo Like Kinase 1                                       | Protein Coding | 48 | GC16P024283 | 1.927557 | <a href="https://www.genecards.org/cgi-bin/carddisp.pl?gene=PLK1">https://www.genecards.org/cgi-bin/carddisp.pl?gene=PLK1</a>     |
| HDAC3  | Histone Deacetylase 3                                    | Protein Coding | 47 | GC05M141583 | 1.927557 | <a href="https://www.genecards.org/cgi-bin/carddisp.pl?gene=HDAC3">https://www.genecards.org/cgi-bin/carddisp.pl?gene=HDAC3</a>   |
| EIF2S3 | Eukaryotic Translation Initiation Factor 2 Subunit Gamma | Protein Coding | 44 | GC0XP024054 | 1.927557 | <a href="https://www.genecards.org/cgi-bin/carddisp.pl?gene=EIF2S3">https://www.genecards.org/cgi-bin/carddisp.pl?gene=EIF2S3</a> |
| NTN1   | Netrin 1                                                 | Protein Coding | 44 | GC17P011249 | 1.927557 | <a href="https://www.genecards.org/cgi-bin/carddisp.pl?gene=NTN1">https://www.genecards.org/cgi-bin/carddisp.pl?gene=NTN1</a>     |
| HIPK2  | Homeodomain Interacting Protein Kinase 2                 | Protein Coding | 43 | GC07M139561 | 1.927557 | <a href="https://www.genecards.org/cgi-bin/carddisp.pl?gene=HIPK2">https://www.genecards.org/cgi-bin/carddisp.pl?gene=HIPK2</a>   |
| PSMA4  | Proteasome 20S Subunit Alpha 4                           | Protein Coding | 42 | GC15P078540 | 1.927557 | <a href="https://www.genecards.org/cgi-bin/carddisp.pl?gene=PSMA4">https://www.genecards.org/cgi-bin/carddisp.pl?gene=PSMA4</a>   |
| SNAI2  | Snail Family Transcriptional Repressor 2                 | Protein Coding | 42 | GC08M048917 | 1.927557 | <a href="https://www.genecards.org/cgi-bin/carddisp.pl?gene=SNAI2">https://www.genecards.org/cgi-bin/carddisp.pl?gene=SNAI2</a>   |
| MYO3A  | Myosin IIIA                                              | Protein Coding | 41 | GC10P025934 | 1.927557 | <a href="https://www.genecards.org/cgi-">https://www.genecards.org/cgi-</a>                                                       |

|         |                                         |                |    |             |          |                                                                                                                                            |
|---------|-----------------------------------------|----------------|----|-------------|----------|--------------------------------------------------------------------------------------------------------------------------------------------|
|         |                                         |                |    |             |          | <a href="http://www.ncbi.nlm.nih.gov/ncbi/cdd/bin/carddisp.pl?gene=MYO3A">bin/carddisp.pl?gene=MYO3A</a>                                   |
| S100A11 | S100 Calcium Binding Protein A11        | Protein Coding | 41 | GC01M152032 | 1.927557 | <a href="http://www.ncbi.nlm.nih.gov/ncbi/cdd/bin/carddisp.pl?gene=S100A11">https://www.genecards.org/cgi-bin/carddisp.pl?gene=S100A11</a> |
| TNFAIP1 | TNF Alpha Induced Protein 1             | Protein Coding | 41 | GC17P028335 | 1.927557 | <a href="http://www.ncbi.nlm.nih.gov/ncbi/cdd/bin/carddisp.pl?gene=TNFAIP1">https://www.genecards.org/cgi-bin/carddisp.pl?gene=TNFAIP1</a> |
| AGXT2   | Alanine--Glyoxylate Aminotransferase 2  | Protein Coding | 40 | GC05M034998 | 1.927557 | <a href="http://www.ncbi.nlm.nih.gov/ncbi/cdd/bin/carddisp.pl?gene=AGXT2">https://www.genecards.org/cgi-bin/carddisp.pl?gene=AGXT2</a>     |
| CD109   | CD109 Molecule                          | Protein Coding | 40 | GC06P084244 | 1.927557 | <a href="http://www.ncbi.nlm.nih.gov/ncbi/cdd/bin/carddisp.pl?gene=CD109">https://www.genecards.org/cgi-bin/carddisp.pl?gene=CD109</a>     |
| EXOC5   | Exocyst Complex Component 5             | Protein Coding | 40 | GC14M057200 | 1.927557 | <a href="http://www.ncbi.nlm.nih.gov/ncbi/cdd/bin/carddisp.pl?gene=EXOC5">https://www.genecards.org/cgi-bin/carddisp.pl?gene=EXOC5</a>     |
| IL13RA1 | Interleukin 13 Receptor Subunit Alpha 1 | Protein Coding | 40 | GC0XP118727 | 1.927557 | <a href="http://www.ncbi.nlm.nih.gov/ncbi/cdd/bin/carddisp.pl?gene=IL13RA1">https://www.genecards.org/cgi-bin/carddisp.pl?gene=IL13RA1</a> |
| SLC6A11 | Solute Carrier Family 6 Member 11       | Protein Coding | 40 | GC03P012471 | 1.927557 | <a href="http://www.ncbi.nlm.nih.gov/ncbi/cdd/bin/carddisp.pl?gene=SLC6A11">https://www.genecards.org/cgi-bin/carddisp.pl?gene=SLC6A11</a> |
| UNC5B   | Unc-5 Netrin Receptor B                 | Protein Coding | 39 | GC10P071212 | 1.927557 | <a href="http://www.ncbi.nlm.nih.gov/ncbi/cdd/bin/carddisp.pl?gene=UNC5B">https://www.genecards.org/cgi-bin/carddisp.pl?gene=UNC5B</a>     |
| CD99    | CD99 Molecule (Xg Blood Group)          | Protein Coding | 38 | GC0XP002691 | 1.927557 | <a href="http://www.ncbi.nlm.nih.gov/ncbi/cdd/bin/carddisp.pl?gene=CD99">https://www.genecards.org/cgi-bin/carddisp.pl?gene=CD99</a>       |
| EXOC4   | Exocyst Complex Component 4             | Protein Coding | 38 | GC07P133253 | 1.927557 | <a href="http://www.ncbi.nlm.nih.gov/ncbi/cdd/bin/carddisp.pl?gene=EXOC4">https://www.genecards.org/cgi-bin/carddisp.pl?gene=EXOC4</a>     |
| GSTM4   | Glutathione S-Transferase Mu 4          | Protein Coding | 38 | GC01P109657 | 1.927557 | <a href="http://www.ncbi.nlm.nih.gov/ncbi/cdd/bin/carddisp.pl?gene=GSTM4">https://www.genecards.org/cgi-bin/carddisp.pl?gene=GSTM4</a>     |
| LMO4    | LIM Domain Only 4                       | Protein Coding | 38 | GC01P087329 | 1.927557 | <a href="http://www.ncbi.nlm.nih.gov/ncbi/cdd/bin/carddisp.pl?gene=LMO4">https://www.genecards.org/cgi-bin/carddisp.pl?gene=LMO4</a>       |
| NHLH2   | Nescient Helix-Loop-Helix 2             | Protein Coding | 38 | GC01M115836 | 1.927557 | <a href="http://www.ncbi.nlm.nih.gov/ncbi/cdd/bin/carddisp.pl?gene=NHLH2">https://www.genecards.org/cgi-bin/carddisp.pl?gene=NHLH2</a>     |

|         |                                                          |                |    |             |          |                                                                                                                                     |
|---------|----------------------------------------------------------|----------------|----|-------------|----------|-------------------------------------------------------------------------------------------------------------------------------------|
| NKIRAS2 | NFKB Inhibitor Interacting Ras Like 2                    | Protein Coding | 38 | GC17P042011 | 1.927557 | <a href="https://www.genecards.org/cgi-bin/carddisp.pl?gene=NKIRAS2">https://www.genecards.org/cgi-bin/carddisp.pl?gene=NKIRAS2</a> |
| PPP1R9A | Protein Phosphatase 1 Regulatory Subunit 9A              | Protein Coding | 38 | GC07P094907 | 1.927557 | <a href="https://www.genecards.org/cgi-bin/carddisp.pl?gene=PPP1R9A">https://www.genecards.org/cgi-bin/carddisp.pl?gene=PPP1R9A</a> |
| RCHY1   | Ring Finger And CHY Zinc Finger Domain Containing 1      | Protein Coding | 38 | GC04M075479 | 1.927557 | <a href="https://www.genecards.org/cgi-bin/carddisp.pl?gene=RCHY1">https://www.genecards.org/cgi-bin/carddisp.pl?gene=RCHY1</a>     |
| RIT2    | Ras Like Without CAAX 2                                  | Protein Coding | 38 | GC18M042743 | 1.927557 | <a href="https://www.genecards.org/cgi-bin/carddisp.pl?gene=RIT2">https://www.genecards.org/cgi-bin/carddisp.pl?gene=RIT2</a>       |
| CEP72   | Centrosomal Protein 72                                   | Protein Coding | 37 | GC05P000612 | 1.927557 | <a href="https://www.genecards.org/cgi-bin/carddisp.pl?gene=CEP72">https://www.genecards.org/cgi-bin/carddisp.pl?gene=CEP72</a>     |
| GBP6    | Guanylate Binding Protein Family Member 6                | Protein Coding | 37 | GC01P089363 | 1.927557 | <a href="https://www.genecards.org/cgi-bin/carddisp.pl?gene=GBP6">https://www.genecards.org/cgi-bin/carddisp.pl?gene=GBP6</a>       |
| IFNK    | Interferon Kappa                                         | Protein Coding | 37 | GC09P027514 | 1.927557 | <a href="https://www.genecards.org/cgi-bin/carddisp.pl?gene=IFNK">https://www.genecards.org/cgi-bin/carddisp.pl?gene=IFNK</a>       |
| SPSB1   | SplA/Ryanodine Receptor Domain And SOCS Box Containing 1 | Protein Coding | 37 | GC01P009292 | 1.927557 | <a href="https://www.genecards.org/cgi-bin/carddisp.pl?gene=SPSB1">https://www.genecards.org/cgi-bin/carddisp.pl?gene=SPSB1</a>     |
| TNIP2   | TNFAIP3 Interacting Protein 2                            | Protein Coding | 37 | GC04M002741 | 1.927557 | <a href="https://www.genecards.org/cgi-bin/carddisp.pl?gene=TNIP2">https://www.genecards.org/cgi-bin/carddisp.pl?gene=TNIP2</a>     |
| ZNF175  | Zinc Finger Protein 175                                  | Protein Coding | 37 | GC19P051571 | 1.927557 | <a href="https://www.genecards.org/cgi-bin/carddisp.pl?gene=ZNF175">https://www.genecards.org/cgi-bin/carddisp.pl?gene=ZNF175</a>   |
| CST5    | Cystatin D                                               | Protein Coding | 36 | GC20M023875 | 1.927557 | <a href="https://www.genecards.org/cgi-bin/carddisp.pl?gene=CST5">https://www.genecards.org/cgi-bin/carddisp.pl?gene=CST5</a>       |
| ENOX1   | Ecto-NOX Disulfide-Thiol Exchanger 1                     | Protein Coding | 36 | GC13M043213 | 1.927557 | <a href="https://www.genecards.org/cgi-bin/carddisp.pl?gene=ENOX1">https://www.genecards.org/cgi-bin/carddisp.pl?gene=ENOX1</a>     |
| N4BP1   | NEDD4 Binding Protein 1                                  | Protein Coding | 36 | GC16M048538 | 1.927557 | <a href="https://www.genecards.org/cgi-bin/carddisp.pl?gene=N4BP1">https://www.genecards.org/cgi-bin/carddisp.pl?gene=N4BP1</a>     |
| SPA17   | Sperm Autoantigenic Protein 17                           | Protein Coding | 36 | GC11P124673 | 1.927557 | <a href="https://www.genecards.org/cgi-bin/carddisp.pl?gene=SPA17">https://www.genecards.org/cgi-bin/carddisp.pl?gene=SPA17</a>     |

|           |                                             |                |    |             |          |                                                                                                                                        |
|-----------|---------------------------------------------|----------------|----|-------------|----------|----------------------------------------------------------------------------------------------------------------------------------------|
|           |                                             |                |    |             |          | <a href="http://www.ncbi.nlm.nih.gov/ncbi/cdd/bin/carddisp.pl?gene=SPA17">bin/carddisp.pl?gene=SPA17</a>                               |
| WFDC1     | WAP Four-Disulfide Core Domain 1            | Protein Coding | 36 | GC16P084328 | 1.927557 | <a href="http://www.genecards.org/cgi-bin/carddisp.pl?gene=WFDC1">https://www.genecards.org/cgi-bin/carddisp.pl?gene=WFDC1</a>         |
| CCL24     | C-C Motif Chemokine Ligand 24               | Protein Coding | 35 | GC07M076814 | 1.927557 | <a href="http://www.genecards.org/cgi-bin/carddisp.pl?gene=CCL24">https://www.genecards.org/cgi-bin/carddisp.pl?gene=CCL24</a>         |
| LVRN      | Laeverin                                    | Protein Coding | 35 | GC05P115962 | 1.927557 | <a href="http://www.genecards.org/cgi-bin/carddisp.pl?gene=LVRN">https://www.genecards.org/cgi-bin/carddisp.pl?gene=LVRN</a>           |
| AHRR      | Aryl Hydrocarbon Receptor Repressor         | Protein Coding | 34 | GC05P000321 | 1.927557 | <a href="http://www.genecards.org/cgi-bin/carddisp.pl?gene=AHRR">https://www.genecards.org/cgi-bin/carddisp.pl?gene=AHRR</a>           |
| ZNF311    | Zinc Finger Protein 311                     | Protein Coding | 30 | GC06M065802 | 1.927557 | <a href="http://www.genecards.org/cgi-bin/carddisp.pl?gene=ZNF311">https://www.genecards.org/cgi-bin/carddisp.pl?gene=ZNF311</a>       |
| CASC2     | Cancer Susceptibility 2                     | RNA Gene       | 25 | GC10P118046 | 1.927557 | <a href="http://www.genecards.org/cgi-bin/carddisp.pl?gene=CASC2">https://www.genecards.org/cgi-bin/carddisp.pl?gene=CASC2</a>         |
| MIR135B   | MicroRNA 135b                               | RNA Gene       | 21 | GC01M205448 | 1.927557 | <a href="http://www.genecards.org/cgi-bin/carddisp.pl?gene=MIR135B">https://www.genecards.org/cgi-bin/carddisp.pl?gene=MIR135B</a>     |
| MIR375    | MicroRNA 375                                | RNA Gene       | 20 | GC02M219001 | 1.927557 | <a href="http://www.genecards.org/cgi-bin/carddisp.pl?gene=MIR375">https://www.genecards.org/cgi-bin/carddisp.pl?gene=MIR375</a>       |
| PRKG1-AS1 | PRKG1 Antisense RNA 1                       | RNA Gene       | 15 | GC10M052194 | 1.927557 | <a href="http://www.genecards.org/cgi-bin/carddisp.pl?gene=PRKG1-AS1">https://www.genecards.org/cgi-bin/carddisp.pl?gene=PRKG1-AS1</a> |
| SVIL-AS1  | SVIL Antisense RNA 1                        | RNA Gene       | 14 | GC10P029410 | 1.927557 | <a href="http://www.genecards.org/cgi-bin/carddisp.pl?gene=SVIL-AS1">https://www.genecards.org/cgi-bin/carddisp.pl?gene=SVIL-AS1</a>   |
| LINC02099 | Long Intergenic Non-Protein Coding RNA 2099 | RNA Gene       | 13 | GC08P029787 | 1.927557 | <a href="http://www.genecards.org/cgi-bin/carddisp.pl?gene=LINC02099">https://www.genecards.org/cgi-bin/carddisp.pl?gene=LINC02099</a> |
| PGM5P2    | Phosphoglucomutase 5 Pseudogene 2           | Pseudo gene    | 11 | GC09M041006 | 1.927557 | <a href="http://www.genecards.org/cgi-bin/carddisp.pl?gene=PGM5P2">https://www.genecards.org/cgi-bin/carddisp.pl?gene=PGM5P2</a>       |
| VPS33B-DT | VPS33B Divergent Transcript                 | RNA Gene       | 11 | GC15P118202 | 1.927557 | <a href="http://www.genecards.org/cgi-bin/carddisp.pl?gene=VPS33B-DT">https://www.genecards.org/cgi-bin/carddisp.pl?gene=VPS33B-DT</a> |

|        |                                                            |                |    |             |          |                                                                                                                                   |
|--------|------------------------------------------------------------|----------------|----|-------------|----------|-----------------------------------------------------------------------------------------------------------------------------------|
| PRODH  | Proline Dehydrogenase 1                                    | Protein Coding | 45 | GC22M018912 | 1.926246 | <a href="https://www.genecards.org/cgi-bin/carddisp.pl?gene=PRODH">https://www.genecards.org/cgi-bin/carddisp.pl?gene=PRODH</a>   |
| MASP2  | MBL Associated Serine Protease 2                           | Protein Coding | 44 | GC01M011026 | 1.925959 | <a href="https://www.genecards.org/cgi-bin/carddisp.pl?gene=MASP2">https://www.genecards.org/cgi-bin/carddisp.pl?gene=MASP2</a>   |
| CCN3   | Cellular Communication Network Factor 3                    | Protein Coding | 32 | GC08P119416 | 1.925529 | <a href="https://www.genecards.org/cgi-bin/carddisp.pl?gene=CCN3">https://www.genecards.org/cgi-bin/carddisp.pl?gene=CCN3</a>     |
| MKKS   | MKKS Centrosomal Shuttling Protein                         | Protein Coding | 38 | GC20M010424 | 1.919375 | <a href="https://www.genecards.org/cgi-bin/carddisp.pl?gene=MKKS">https://www.genecards.org/cgi-bin/carddisp.pl?gene=MKKS</a>     |
| LY96   | Lymphocyte Antigen 96                                      | Protein Coding | 41 | GC08P073991 | 1.918517 | <a href="https://www.genecards.org/cgi-bin/carddisp.pl?gene=LY96">https://www.genecards.org/cgi-bin/carddisp.pl?gene=LY96</a>     |
| MIR23B | MicroRNA 23b                                               | RNA Gene       | 21 | GC09P095085 | 1.917947 | <a href="https://www.genecards.org/cgi-bin/carddisp.pl?gene=MIR23B">https://www.genecards.org/cgi-bin/carddisp.pl?gene=MIR23B</a> |
| FCGBP  | Fc Gamma Binding Protein                                   | Protein Coding | 35 | GC19M039863 | 1.916951 | <a href="https://www.genecards.org/cgi-bin/carddisp.pl?gene=FCGBP">https://www.genecards.org/cgi-bin/carddisp.pl?gene=FCGBP</a>   |
| NCF1   | Neutrophil Cytosolic Factor 1                              | Protein Coding | 45 | GC07P075454 | 1.916344 | <a href="https://www.genecards.org/cgi-bin/carddisp.pl?gene=NCF1">https://www.genecards.org/cgi-bin/carddisp.pl?gene=NCF1</a>     |
| RECK   | Reversion Inducing Cysteine Rich Protein With Kazal Motifs | Protein Coding | 40 | GC09P036036 | 1.913467 | <a href="https://www.genecards.org/cgi-bin/carddisp.pl?gene=RECK">https://www.genecards.org/cgi-bin/carddisp.pl?gene=RECK</a>     |
| BIRC2  | Baculoviral IAP Repeat Containing 2                        | Protein Coding | 44 | GC11P102347 | 1.911999 | <a href="https://www.genecards.org/cgi-bin/carddisp.pl?gene=BIRC2">https://www.genecards.org/cgi-bin/carddisp.pl?gene=BIRC2</a>   |
| XRCC5  | X-Ray Repair Cross Complementing 5                         | Protein Coding | 42 | GC02P216107 | 1.910465 | <a href="https://www.genecards.org/cgi-bin/carddisp.pl?gene=XRCC5">https://www.genecards.org/cgi-bin/carddisp.pl?gene=XRCC5</a>   |
| FCRL6  | Fc Receptor Like 6                                         | Protein Coding | 34 | GC01P159800 | 1.90864  | <a href="https://www.genecards.org/cgi-bin/carddisp.pl?gene=FCRL6">https://www.genecards.org/cgi-bin/carddisp.pl?gene=FCRL6</a>   |
| AMPH   | Amphiphysin                                                | Protein Coding | 42 | GC07M039077 | 1.905197 | <a href="https://www.genecards.org/cgi-bin/carddisp.pl?gene=AMPH">https://www.genecards.org/cgi-bin/carddisp.pl?gene=AMPH</a>     |
| PPL    | Periplakin                                                 | Protein Coding | 40 | GC16M007350 | 1.905197 | <a href="https://www.genecards.org/cgi-bin/carddisp.pl?gene=PPL">https://www.genecards.org/cgi-bin/carddisp.pl?gene=PPL</a>       |

|        |                                                                  |                |    |             |          |                                                                                                                                  |
|--------|------------------------------------------------------------------|----------------|----|-------------|----------|----------------------------------------------------------------------------------------------------------------------------------|
|        |                                                                  |                |    |             |          | <a href="http://www.ncbi.nlm.nih.gov/ncbi/cdd/bin/carddisp.pl?gene=PPL">bin/carddisp.pl?gene=PPL</a>                             |
| EVPL   | Envoplakin                                                       | Protein Coding | 36 | GC17M076004 | 1.905197 | <a href="http://www.genecards.org/cgi-bin/carddisp.pl?gene=EVPL">https://www.genecards.org/cgi-bin/carddisp.pl?gene=EVPL</a>     |
| UGT1A1 | UDP Glucuronosyltransferase Family 1 Member A1                   | Protein Coding | 48 | GC02P233760 | 1.894173 | <a href="http://www.genecards.org/cgi-bin/carddisp.pl?gene=UGT1A1">https://www.genecards.org/cgi-bin/carddisp.pl?gene=UGT1A1</a> |
| PRLR   | Prolactin Receptor                                               | Protein Coding | 46 | GC05M035048 | 1.890139 | <a href="http://www.genecards.org/cgi-bin/carddisp.pl?gene=PRLR">https://www.genecards.org/cgi-bin/carddisp.pl?gene=PRLR</a>     |
| TRPV2  | Transient Receptor Potential Cation Channel Subfamily V Member 2 | Protein Coding | 40 | GC17P016415 | 1.88929  | <a href="http://www.genecards.org/cgi-bin/carddisp.pl?gene=TRPV2">https://www.genecards.org/cgi-bin/carddisp.pl?gene=TRPV2</a>   |
| PTK2   | Protein Tyrosine Kinase 2                                        | Protein Coding | 45 | GC08M140657 | 1.888314 | <a href="http://www.genecards.org/cgi-bin/carddisp.pl?gene=PTK2">https://www.genecards.org/cgi-bin/carddisp.pl?gene=PTK2</a>     |
| P2RY11 | Purinergic Receptor P2Y11                                        | Protein Coding | 42 | GC19P010454 | 1.887588 | <a href="http://www.genecards.org/cgi-bin/carddisp.pl?gene=P2RY11">https://www.genecards.org/cgi-bin/carddisp.pl?gene=P2RY11</a> |
| HK2    | Hexokinase 2                                                     | Protein Coding | 45 | GC02P074833 | 1.885739 | <a href="http://www.genecards.org/cgi-bin/carddisp.pl?gene=HK2">https://www.genecards.org/cgi-bin/carddisp.pl?gene=HK2</a>       |
| PTPN6  | Protein Tyrosine Phosphatase Non-Receptor Type 6                 | Protein Coding | 47 | GC12P021091 | 1.885293 | <a href="http://www.genecards.org/cgi-bin/carddisp.pl?gene=PTPN6">https://www.genecards.org/cgi-bin/carddisp.pl?gene=PTPN6</a>   |
| VCAN   | Versican                                                         | Protein Coding | 46 | GC05P083471 | 1.88336  | <a href="http://www.genecards.org/cgi-bin/carddisp.pl?gene=VCAN">https://www.genecards.org/cgi-bin/carddisp.pl?gene=VCAN</a>     |
| NKX2-1 | NK2 Homeobox 1                                                   | Protein Coding | 44 | GC14M036516 | 1.882484 | <a href="http://www.genecards.org/cgi-bin/carddisp.pl?gene=NKX2-1">https://www.genecards.org/cgi-bin/carddisp.pl?gene=NKX2-1</a> |
| MSTN   | Myostatin                                                        | Protein Coding | 45 | GC02M190055 | 1.881957 | <a href="http://www.genecards.org/cgi-bin/carddisp.pl?gene=MSTN">https://www.genecards.org/cgi-bin/carddisp.pl?gene=MSTN</a>     |
| PCDH15 | Protocadherin Related 15                                         | Protein Coding | 40 | GC10M053802 | 1.877976 | <a href="http://www.genecards.org/cgi-bin/carddisp.pl?gene=PCDH15">https://www.genecards.org/cgi-bin/carddisp.pl?gene=PCDH15</a> |
| MIR326 | MicroRNA 326                                                     | RNA Gene       | 22 | GC11M075335 | 1.877976 | <a href="http://www.genecards.org/cgi-bin/carddisp.pl?gene=MIR326">https://www.genecards.org/cgi-bin/carddisp.pl?gene=MIR326</a> |

|          |                                                          |                |    |             |          |                                                                                                                                       |
|----------|----------------------------------------------------------|----------------|----|-------------|----------|---------------------------------------------------------------------------------------------------------------------------------------|
| MIR181A1 | MicroRNA 181a-1                                          | RNA Gene       | 20 | GC01M198860 | 1.877976 | <a href="https://www.genecards.org/cgi-bin/carddisp.pl?gene=MIR181A1">https://www.genecards.org/cgi-bin/carddisp.pl?gene=MIR181A1</a> |
| IGHV1-69 | Immunoglobulin Heavy Variable 1-69                       | Protein Coding | 21 | GC14M112841 | 1.872855 | <a href="https://www.genecards.org/cgi-bin/carddisp.pl?gene=IGHV1-69">https://www.genecards.org/cgi-bin/carddisp.pl?gene=IGHV1-69</a> |
| CEMIP    | Cell Migration Inducing Hyaluronidase 1                  | Protein Coding | 34 | GC15P080779 | 1.870194 | <a href="https://www.genecards.org/cgi-bin/carddisp.pl?gene=CEMIP">https://www.genecards.org/cgi-bin/carddisp.pl?gene=CEMIP</a>       |
| MMP26    | Matrix Metalloproteinase 26                              | Protein Coding | 34 | GC11P004706 | 1.870128 | <a href="https://www.genecards.org/cgi-bin/carddisp.pl?gene=MMP26">https://www.genecards.org/cgi-bin/carddisp.pl?gene=MMP26</a>       |
| RIPK3    | Receptor Interacting Serine/Threonine Kinase 3           | Protein Coding | 40 | GC14M024336 | 1.869082 | <a href="https://www.genecards.org/cgi-bin/carddisp.pl?gene=RIPK3">https://www.genecards.org/cgi-bin/carddisp.pl?gene=RIPK3</a>       |
| TNNT2    | Troponin T2, Cardiac Type                                | Protein Coding | 46 | GC01M201359 | 1.867014 | <a href="https://www.genecards.org/cgi-bin/carddisp.pl?gene=TNNT2">https://www.genecards.org/cgi-bin/carddisp.pl?gene=TNNT2</a>       |
| TPH1     | Tryptophan Hydroxylase 1                                 | Protein Coding | 42 | GC11M018040 | 1.866312 | <a href="https://www.genecards.org/cgi-bin/carddisp.pl?gene=TPH1">https://www.genecards.org/cgi-bin/carddisp.pl?gene=TPH1</a>         |
| PRG2     | Proteoglycan 2, Pro Eosinophil Major Basic Protein       | Protein Coding | 39 | GC11M057386 | 1.865162 | <a href="https://www.genecards.org/cgi-bin/carddisp.pl?gene=PRG2">https://www.genecards.org/cgi-bin/carddisp.pl?gene=PRG2</a>         |
| KCNN4    | Potassium Calcium-Activated Channel Subfamily N Member 4 | Protein Coding | 47 | GC19M065881 | 1.864761 | <a href="https://www.genecards.org/cgi-bin/carddisp.pl?gene=KCNN4">https://www.genecards.org/cgi-bin/carddisp.pl?gene=KCNN4</a>       |
| BMP3     | Bone Morphogenetic Protein 3                             | Protein Coding | 41 | GC04P081030 | 1.864489 | <a href="https://www.genecards.org/cgi-bin/carddisp.pl?gene=BMP3">https://www.genecards.org/cgi-bin/carddisp.pl?gene=BMP3</a>         |
| LILRA1   | Leukocyte Immunoglobulin Like Receptor A1                | Protein Coding | 36 | GC19P054593 | 1.862653 | <a href="https://www.genecards.org/cgi-bin/carddisp.pl?gene=LILRA1">https://www.genecards.org/cgi-bin/carddisp.pl?gene=LILRA1</a>     |
| DRD4     | Dopamine Receptor D4                                     | Protein Coding | 45 | GC11P001768 | 1.860697 | <a href="https://www.genecards.org/cgi-bin/carddisp.pl?gene=DRD4">https://www.genecards.org/cgi-bin/carddisp.pl?gene=DRD4</a>         |
| VDAC1    | Voltage Dependent Anion Channel 1                        | Protein Coding | 45 | GC05M133975 | 1.860697 | <a href="https://www.genecards.org/cgi-bin/carddisp.pl?gene=VDAC1">https://www.genecards.org/cgi-bin/carddisp.pl?gene=VDAC1</a>       |
| DSCAM    | DS Cell Adhesion Molecule                                | Protein Coding | 41 | GC21M040010 | 1.860697 | <a href="https://www.genecards.org/cgi-bin/carddisp.pl?gene=DSCAM">https://www.genecards.org/cgi-bin/carddisp.pl?gene=DSCAM</a>       |

|         |                                                           |                |    |             |          |                                                                                                                                     |
|---------|-----------------------------------------------------------|----------------|----|-------------|----------|-------------------------------------------------------------------------------------------------------------------------------------|
|         |                                                           |                |    |             |          | <a href="#">bin/carddisp.pl?gene=DSCAM</a>                                                                                          |
| EIF2AK3 | Eukaryotic Translation Initiation Factor 2 Alpha Kinase 3 | Protein Coding | 46 | GC02M088556 | 1.857245 | <a href="https://www.genecards.org/cgi-bin/carddisp.pl?gene=EIF2AK3">https://www.genecards.org/cgi-bin/carddisp.pl?gene=EIF2AK3</a> |
| ANXA4   | Annexin A4                                                | Protein Coding | 42 | GC02P069644 | 1.854004 | <a href="https://www.genecards.org/cgi-bin/carddisp.pl?gene=ANXA4">https://www.genecards.org/cgi-bin/carddisp.pl?gene=ANXA4</a>     |
| SFRP5   | Secreted Frizzled Related Protein 5                       | Protein Coding | 38 | GC10M097766 | 1.854004 | <a href="https://www.genecards.org/cgi-bin/carddisp.pl?gene=SFRP5">https://www.genecards.org/cgi-bin/carddisp.pl?gene=SFRP5</a>     |
| CIP2A   | Cellular Inhibitor Of PP2A                                | Protein Coding | 28 | GC03M108573 | 1.854004 | <a href="https://www.genecards.org/cgi-bin/carddisp.pl?gene=CIP2A">https://www.genecards.org/cgi-bin/carddisp.pl?gene=CIP2A</a>     |
| CYSLTR2 | Cysteinyl Leukotriene Receptor 2                          | Protein Coding | 45 | GC13P048653 | 1.850214 | <a href="https://www.genecards.org/cgi-bin/carddisp.pl?gene=CYSLTR2">https://www.genecards.org/cgi-bin/carddisp.pl?gene=CYSLTR2</a> |
| REV3L   | REV3 Like, DNA Directed Polymerase Zeta Catalytic Subunit | Protein Coding | 44 | GC06M111299 | 1.850214 | <a href="https://www.genecards.org/cgi-bin/carddisp.pl?gene=REV3L">https://www.genecards.org/cgi-bin/carddisp.pl?gene=REV3L</a>     |
| DDAH2   | Dimethylarginine Dimethylaminohydrolase 2                 | Protein Coding | 42 | GC06M031727 | 1.850214 | <a href="https://www.genecards.org/cgi-bin/carddisp.pl?gene=DDAH2">https://www.genecards.org/cgi-bin/carddisp.pl?gene=DDAH2</a>     |
| VARs2   | Valyl-TRNA Synthetase 2, Mitochondrial                    | Protein Coding | 42 | GC06P083680 | 1.850214 | <a href="https://www.genecards.org/cgi-bin/carddisp.pl?gene=VARs2">https://www.genecards.org/cgi-bin/carddisp.pl?gene=VARs2</a>     |
| PPT2    | Palmitoyl-Protein Thioesterase 2                          | Protein Coding | 38 | GC06P032153 | 1.850214 | <a href="https://www.genecards.org/cgi-bin/carddisp.pl?gene=PPT2">https://www.genecards.org/cgi-bin/carddisp.pl?gene=PPT2</a>       |
| IER3    | Immediate Early Response 3                                | Protein Coding | 37 | GC06M030743 | 1.850214 | <a href="https://www.genecards.org/cgi-bin/carddisp.pl?gene=IER3">https://www.genecards.org/cgi-bin/carddisp.pl?gene=IER3</a>       |
| LY6G6C  | Lymphocyte Antigen 6 Family Member G6C                    | Protein Coding | 34 | GC06M065967 | 1.850214 | <a href="https://www.genecards.org/cgi-bin/carddisp.pl?gene=LY6G6C">https://www.genecards.org/cgi-bin/carddisp.pl?gene=LY6G6C</a>   |
| GPX4    | Glutathione Peroxidase 4                                  | Protein Coding | 45 | GC19P001103 | 1.847338 | <a href="https://www.genecards.org/cgi-bin/carddisp.pl?gene=GPX4">https://www.genecards.org/cgi-bin/carddisp.pl?gene=GPX4</a>       |
| SKIV2L  | Ski2 Like RNA Helicase                                    | Protein Coding | 42 | GC06P083717 | 1.842764 | <a href="https://www.genecards.org/cgi-bin/carddisp.pl?gene=SKIV2L">https://www.genecards.org/cgi-bin/carddisp.pl?gene=SKIV2L</a>   |



|          |                                                         |                |    |             |          |                                                                                                                                       |
|----------|---------------------------------------------------------|----------------|----|-------------|----------|---------------------------------------------------------------------------------------------------------------------------------------|
| DICER1   | Dicer 1, Ribonuclease III                               | Protein Coding | 46 | GC14M095086 | 1.842058 | <a href="https://www.genecards.org/cgi-bin/carddisp.pl?gene=DICER1">https://www.genecards.org/cgi-bin/carddisp.pl?gene=DICER1</a>     |
| TG       | Thyroglobulin                                           | Protein Coding | 43 | GC08P132866 | 1.841997 | <a href="https://www.genecards.org/cgi-bin/carddisp.pl?gene=TG">https://www.genecards.org/cgi-bin/carddisp.pl?gene=TG</a>             |
| FZD4     | Frizzled Class Receptor 4                               | Protein Coding | 48 | GC11M086945 | 1.839318 | <a href="https://www.genecards.org/cgi-bin/carddisp.pl?gene=FZD4">https://www.genecards.org/cgi-bin/carddisp.pl?gene=FZD4</a>         |
| DEFB103B | Defensin Beta 103B                                      | Protein Coding | 28 | GC08M007430 | 1.839135 | <a href="https://www.genecards.org/cgi-bin/carddisp.pl?gene=DEFB103B">https://www.genecards.org/cgi-bin/carddisp.pl?gene=DEFB103B</a> |
| RPS6KB1  | Ribosomal Protein S6 Kinase B1                          | Protein Coding | 46 | GC17P059893 | 1.83789  | <a href="https://www.genecards.org/cgi-bin/carddisp.pl?gene=RPS6KB1">https://www.genecards.org/cgi-bin/carddisp.pl?gene=RPS6KB1</a>   |
| GFAP     | Glial Fibrillary Acidic Protein                         | Protein Coding | 45 | GC17M044917 | 1.83789  | <a href="https://www.genecards.org/cgi-bin/carddisp.pl?gene=GFAP">https://www.genecards.org/cgi-bin/carddisp.pl?gene=GFAP</a>         |
| MIR138-1 | MicroRNA 138-1                                          | RNA Gene       | 20 | GC03P044115 | 1.83789  | <a href="https://www.genecards.org/cgi-bin/carddisp.pl?gene=MIR138-1">https://www.genecards.org/cgi-bin/carddisp.pl?gene=MIR138-1</a> |
| FLT3LG   | Fms Related Receptor Tyrosine Kinase 3 Ligand           | Protein Coding | 38 | GC19P067098 | 1.83133  | <a href="https://www.genecards.org/cgi-bin/carddisp.pl?gene=FLT3LG">https://www.genecards.org/cgi-bin/carddisp.pl?gene=FLT3LG</a>     |
| PDCD1LG2 | Programmed Cell Death 1 Ligand 2                        | Protein Coding | 40 | GC09P005510 | 1.830708 | <a href="https://www.genecards.org/cgi-bin/carddisp.pl?gene=PDCD1LG2">https://www.genecards.org/cgi-bin/carddisp.pl?gene=PDCD1LG2</a> |
| WASF5P   | WASP Family Member 5, Pseudogene                        | Pseudo gene    | 10 | GC06M031287 | 1.830359 | <a href="https://www.genecards.org/cgi-bin/carddisp.pl?gene=WASF5P">https://www.genecards.org/cgi-bin/carddisp.pl?gene=WASF5P</a>     |
| MIR10A   | MicroRNA 10a                                            | RNA Gene       | 22 | GC17M048579 | 1.829958 | <a href="https://www.genecards.org/cgi-bin/carddisp.pl?gene=MIR10A">https://www.genecards.org/cgi-bin/carddisp.pl?gene=MIR10A</a>     |
| LRP2     | LDL Receptor Related Protein 2                          | Protein Coding | 47 | GC02M169127 | 1.827882 | <a href="https://www.genecards.org/cgi-bin/carddisp.pl?gene=LRP2">https://www.genecards.org/cgi-bin/carddisp.pl?gene=LRP2</a>         |
| KCNMA1   | Potassium Calcium-Activated Channel Subfamily M Alpha 1 | Protein Coding | 48 | GC10M076869 | 1.82622  | <a href="https://www.genecards.org/cgi-bin/carddisp.pl?gene=KCNMA1">https://www.genecards.org/cgi-bin/carddisp.pl?gene=KCNMA1</a>     |
| CMA1     | Chymase 1                                               | Protein Coding | 42 | GC14M024506 | 1.822592 | <a href="https://www.genecards.org/cgi-bin/carddisp.pl?gene=CMA1">https://www.genecards.org/cgi-bin/carddisp.pl?gene=CMA1</a>         |

|           |                                             |                |    |             |          |                                                                                                                                         |
|-----------|---------------------------------------------|----------------|----|-------------|----------|-----------------------------------------------------------------------------------------------------------------------------------------|
|           |                                             |                |    |             |          | <a href="#">bin/carddisp.pl?gene=CMA1</a>                                                                                               |
| RAD50     | RAD50 Double Strand Break Repair Protein    | Protein Coding | 48 | GC05P132556 | 1.821556 | <a href="https://www.genecards.org/cgi-bin/carddisp.pl?gene=RAD50">https://www.genecards.org/cgi-bin/carddisp.pl?gene=RAD50</a>         |
| AFF4      | AF4/FMR2 Family Member 4                    | Protein Coding | 41 | GC05M132875 | 1.821556 | <a href="https://www.genecards.org/cgi-bin/carddisp.pl?gene=AFF4">https://www.genecards.org/cgi-bin/carddisp.pl?gene=AFF4</a>           |
| ZFP36L1   | ZFP36 Ring Finger Protein Like 1            | Protein Coding | 41 | GC14M068787 | 1.821556 | <a href="https://www.genecards.org/cgi-bin/carddisp.pl?gene=ZFP36L1">https://www.genecards.org/cgi-bin/carddisp.pl?gene=ZFP36L1</a>     |
| SRSF5     | Serine And Arginine Rich Splicing Factor 5  | Protein Coding | 38 | GC14P069727 | 1.821556 | <a href="https://www.genecards.org/cgi-bin/carddisp.pl?gene=SRSF5">https://www.genecards.org/cgi-bin/carddisp.pl?gene=SRSF5</a>         |
| ZFYVE26   | Zinc Finger FYVE-Type Containing 26         | Protein Coding | 38 | GC14M067727 | 1.821556 | <a href="https://www.genecards.org/cgi-bin/carddisp.pl?gene=ZFYVE26">https://www.genecards.org/cgi-bin/carddisp.pl?gene=ZFYVE26</a>     |
| ZCCHC10   | Zinc Finger CCHC-Type Containing 10         | Protein Coding | 32 | GC05M132996 | 1.821556 | <a href="https://www.genecards.org/cgi-bin/carddisp.pl?gene=ZCCHC10">https://www.genecards.org/cgi-bin/carddisp.pl?gene=ZCCHC10</a>     |
| SUSD6     | Sushi Domain Containing 6                   | Protein Coding | 31 | GC14P069611 | 1.821556 | <a href="https://www.genecards.org/cgi-bin/carddisp.pl?gene=SUSD6">https://www.genecards.org/cgi-bin/carddisp.pl?gene=SUSD6</a>         |
| IRF1-AS1  | IRF1 Antisense RNA 1                        | RNA Gene       | 20 | GC05P132420 | 1.821556 | <a href="https://www.genecards.org/cgi-bin/carddisp.pl?gene=IRF1-AS1">https://www.genecards.org/cgi-bin/carddisp.pl?gene=IRF1-AS1</a>   |
| MEIKIN    | Meiotic Kinetochore Factor                  | Protein Coding | 20 | GC05M131806 | 1.821556 | <a href="https://www.genecards.org/cgi-bin/carddisp.pl?gene=MEIKIN">https://www.genecards.org/cgi-bin/carddisp.pl?gene=MEIKIN</a>       |
| MIR3936HG | MIR3936 Host Gene                           | RNA Gene       | 13 | GC05M132312 | 1.821556 | <a href="https://www.genecards.org/cgi-bin/carddisp.pl?gene=MIR3936HG">https://www.genecards.org/cgi-bin/carddisp.pl?gene=MIR3936HG</a> |
| LINC01882 | Long Intergenic Non-Protein Coding RNA 1882 | RNA Gene       | 11 | GC18M024974 | 1.821556 | <a href="https://www.genecards.org/cgi-bin/carddisp.pl?gene=LINC01882">https://www.genecards.org/cgi-bin/carddisp.pl?gene=LINC01882</a> |
| DDX18P1   | DEAD-Box Helicase 18 Pseudogene 1           | Pseudo gene    | 9  | GC14P069083 | 1.821556 | <a href="https://www.genecards.org/cgi-bin/carddisp.pl?gene=DDX18P1">https://www.genecards.org/cgi-bin/carddisp.pl?gene=DDX18P1</a>     |
| LINC02863 | Long Intergenic Non-Protein Coding RNA 2863 | RNA Gene       | 9  | GC05M132422 | 1.821556 | <a href="https://www.genecards.org/cgi-bin/carddisp.pl?gene=LINC02863">https://www.genecards.org/cgi-bin/carddisp.pl?gene=LINC02863</a> |

|                 |                                                              |                |   |              |           |                                                                                                                                                     |
|-----------------|--------------------------------------------------------------|----------------|---|--------------|-----------|-----------------------------------------------------------------------------------------------------------------------------------------------------|
| RNU6-921P       | RNA, U6 Small Nuclear 921, Pseudogene                        | Pseudo gene    | 9 | GC14M 068735 | 1.821 556 | <a href="https://www.genecards.org/cgi-bin/carddisp.pl?gene=RNU6-921P">https://www.genecards.org/cgi-bin/carddisp.pl?gene=RNU6-921P</a>             |
| ENSG00000202533 | Y RNA                                                        | RNA Gene       | 8 | GC05P 132468 | 1.821 556 | <a href="https://www.genecards.org/cgi-bin/carddisp.pl?gene=ENSG00000202533">https://www.genecards.org/cgi-bin/carddisp.pl?gene=ENSG00000202533</a> |
| HMGNI3          | High Mobility Group Nucleosome Binding Domain 1 Pseudogene 3 | Pseudo gene    | 8 | GC14M 068886 | 1.821 556 | <a href="https://www.genecards.org/cgi-bin/carddisp.pl?gene=HMGNI3">https://www.genecards.org/cgi-bin/carddisp.pl?gene=HMGNI3</a>                   |
| ENSG00000283782 | Novel Protein                                                | Protein Coding | 7 | GC05P 132417 | 1.821 556 | <a href="https://www.genecards.org/cgi-bin/carddisp.pl?gene=ENSG00000283782">https://www.genecards.org/cgi-bin/carddisp.pl?gene=ENSG00000283782</a> |
| ENSG00000289583 | Novel Transcript                                             | RNA Gene       | 6 | GC14M 068812 | 1.821 556 | <a href="https://www.genecards.org/cgi-bin/carddisp.pl?gene=ENSG00000289583">https://www.genecards.org/cgi-bin/carddisp.pl?gene=ENSG00000289583</a> |
| ENSG00000224431 | Cytoplasmic Linker Associated Protein 2 (CLASP2) Pseudogene  | Pseudo gene    | 5 | GC05P 132199 | 1.821 556 | <a href="https://www.genecards.org/cgi-bin/carddisp.pl?gene=ENSG00000224431">https://www.genecards.org/cgi-bin/carddisp.pl?gene=ENSG00000224431</a> |
| ENSG00000289626 | Novel Transcript, Sense Intronic To ZFP36L1                  | RNA Gene       | 5 | GC14M 068804 | 1.821 556 | <a href="https://www.genecards.org/cgi-bin/carddisp.pl?gene=ENSG00000289626">https://www.genecards.org/cgi-bin/carddisp.pl?gene=ENSG00000289626</a> |
| HSALNG0102112   |                                                              | RNA Gene       | 5 | GC14P 068766 | 1.821 556 | <a href="https://www.genecards.org/cgi-bin/carddisp.pl?gene=HSALNG0102112">https://www.genecards.org/cgi-bin/carddisp.pl?gene=HSALNG0102112</a>     |
| HSALNG0102114   |                                                              | RNA Gene       | 5 | GC14P 068787 | 1.821 556 | <a href="https://www.genecards.org/cgi-bin/carddisp.pl?gene=HSALNG0102114">https://www.genecards.org/cgi-bin/carddisp.pl?gene=HSALNG0102114</a>     |
| HSALNG0102115   |                                                              | RNA Gene       | 5 | GC14P 068789 | 1.821 556 | <a href="https://www.genecards.org/cgi-bin/carddisp.pl?gene=HSALNG0102115">https://www.genecards.org/cgi-bin/carddisp.pl?gene=HSALNG0102115</a>     |
| HSALNG0102116   |                                                              | RNA Gene       | 5 | GC14P 068790 | 1.821 556 | <a href="https://www.genecards.org/cgi-bin/carddisp.pl?gene=HSALNG0102116">https://www.genecards.org/cgi-bin/carddisp.pl?gene=HSALNG0102116</a>     |
| lnc-IRF1-1      |                                                              | RNA Gene       | 5 | GC05M 132473 | 1.821 556 | <a href="https://www.genecards.org/cgi-bin/carddisp.pl?gene=lnc-IRF1-1">https://www.genecards.org/cgi-bin/carddisp.pl?gene=lnc-IRF1-1</a>           |
| lnc-RAD51B-6    |                                                              | RNA Gene       | 5 | GC14P 068795 | 1.821 556 | <a href="https://www.genecards.org/cgi-bin/carddisp.pl?gene=lnc-RAD51B-6">https://www.genecards.org/cgi-bin/carddisp.pl?gene=lnc-RAD51B-6</a>       |
| HSALNG0044846   |                                                              | RNA Gene       | 4 | GC05P 132467 | 1.821 556 | <a href="https://www.genecards.org/cgi-">https://www.genecards.org/cgi-</a>                                                                         |

|              |                                                           |                |    |             |          |                                                                                                                                                      |
|--------------|-----------------------------------------------------------|----------------|----|-------------|----------|------------------------------------------------------------------------------------------------------------------------------------------------------|
|              |                                                           |                |    |             |          | <a href="http://www.ncbi.nlm.nih.gov/ncbi/cdd/bin/carddisp.pl?gene=HSALNG0044846">bin/carddisp.pl?gene=HSALNG0044846</a>                             |
| LOC107984709 | Uncharacterized LOC107984709                              | RNA Gene       | 4  | GC14M068793 | 1.821556 | <a href="http://www.ncbi.nlm.nih.gov/ncbi/cdd/bin/carddisp.pl?gene=LOC107984709">https://www.genecards.org/cgi-bin/carddisp.pl?gene=LOC107984709</a> |
| MN298214     |                                                           | RNA Gene       | 4  | GC05P132451 | 1.821556 | <a href="http://www.ncbi.nlm.nih.gov/ncbi/cdd/bin/carddisp.pl?gene=MN298214">https://www.genecards.org/cgi-bin/carddisp.pl?gene=MN298214</a>         |
| NPHS1        | NPHS1 Adhesion Molecule, Nephlin                          | Protein Coding | 44 | GC19M035825 | 1.821475 | <a href="http://www.ncbi.nlm.nih.gov/ncbi/cdd/bin/carddisp.pl?gene=NPHS1">https://www.genecards.org/cgi-bin/carddisp.pl?gene=NPHS1</a>               |
| ANXA11       | Annexin A11                                               | Protein Coding | 43 | GC10M080150 | 1.820759 | <a href="http://www.ncbi.nlm.nih.gov/ncbi/cdd/bin/carddisp.pl?gene=ANXA11">https://www.genecards.org/cgi-bin/carddisp.pl?gene=ANXA11</a>             |
| LAMP3        | Lysosomal Associated Membrane Protein 3                   | Protein Coding | 38 | GC03M183122 | 1.819405 | <a href="http://www.ncbi.nlm.nih.gov/ncbi/cdd/bin/carddisp.pl?gene=LAMP3">https://www.genecards.org/cgi-bin/carddisp.pl?gene=LAMP3</a>               |
| TICAM1       | TIR Domain Containing Adaptor Molecule 1                  | Protein Coding | 42 | GC19M004815 | 1.818682 | <a href="http://www.ncbi.nlm.nih.gov/ncbi/cdd/bin/carddisp.pl?gene=TICAM1">https://www.genecards.org/cgi-bin/carddisp.pl?gene=TICAM1</a>             |
| PLA2G2D      | Phospholipase A2 Group IID                                | Protein Coding | 41 | GC01M020111 | 1.818682 | <a href="http://www.ncbi.nlm.nih.gov/ncbi/cdd/bin/carddisp.pl?gene=PLA2G2D">https://www.genecards.org/cgi-bin/carddisp.pl?gene=PLA2G2D</a>           |
| HABP2        | Hyaluronan Binding Protein 2                              | Protein Coding | 45 | GC10P113550 | 1.818093 | <a href="http://www.ncbi.nlm.nih.gov/ncbi/cdd/bin/carddisp.pl?gene=HABP2">https://www.genecards.org/cgi-bin/carddisp.pl?gene=HABP2</a>               |
| IVNS1A BP    | Influenza Virus NS1A Binding Protein                      | Protein Coding | 40 | GC01M185306 | 1.817918 | <a href="http://www.ncbi.nlm.nih.gov/ncbi/cdd/bin/carddisp.pl?gene=IVNS1ABP">https://www.genecards.org/cgi-bin/carddisp.pl?gene=IVNS1ABP</a>         |
| GAD2         | Glutamate Decarboxylase 2                                 | Protein Coding | 42 | GC10P026216 | 1.817205 | <a href="http://www.ncbi.nlm.nih.gov/ncbi/cdd/bin/carddisp.pl?gene=GAD2">https://www.genecards.org/cgi-bin/carddisp.pl?gene=GAD2</a>                 |
| ADAMTS9      | ADAM Metalloproteinase With Thrombospondin Type 1 Motif 9 | Protein Coding | 38 | GC03M064501 | 1.815725 | <a href="http://www.ncbi.nlm.nih.gov/ncbi/cdd/bin/carddisp.pl?gene=ADAMTS9">https://www.genecards.org/cgi-bin/carddisp.pl?gene=ADAMTS9</a>           |
| CDK1         | Cyclin Dependent Kinase 1                                 | Protein Coding | 44 | GC10P060772 | 1.815159 | <a href="http://www.ncbi.nlm.nih.gov/ncbi/cdd/bin/carddisp.pl?gene=CDK1">https://www.genecards.org/cgi-bin/carddisp.pl?gene=CDK1</a>                 |
| ARL1         | ADP Ribosylation Factor Like GTPase 1                     | Protein Coding | 40 | GC12M101393 | 1.803441 | <a href="http://www.ncbi.nlm.nih.gov/ncbi/cdd/bin/carddisp.pl?gene=ARL1">https://www.genecards.org/cgi-bin/carddisp.pl?gene=ARL1</a>                 |

|         |                                              |                |    |             |          |                                                                                                                                     |
|---------|----------------------------------------------|----------------|----|-------------|----------|-------------------------------------------------------------------------------------------------------------------------------------|
| PLCG1   | Phospholipase C Gamma 1                      | Protein Coding | 46 | GC20P041136 | 1.799927 | <a href="https://www.genecards.org/cgi-bin/carddisp.pl?gene=PLCG1">https://www.genecards.org/cgi-bin/carddisp.pl?gene=PLCG1</a>     |
| C4BPA   | Complement Component 4 Binding Protein Alpha | Protein Coding | 41 | GC01P207105 | 1.79878  | <a href="https://www.genecards.org/cgi-bin/carddisp.pl?gene=C4BPA">https://www.genecards.org/cgi-bin/carddisp.pl?gene=C4BPA</a>     |
| POLR1C  | RNA Polymerase I And III Subunit C           | Protein Coding | 42 | GC06P083925 | 1.794698 | <a href="https://www.genecards.org/cgi-bin/carddisp.pl?gene=POLR1C">https://www.genecards.org/cgi-bin/carddisp.pl?gene=POLR1C</a>   |
| EIF4H   | Eukaryotic Translation Initiation Factor 4H  | Protein Coding | 40 | GC07P074174 | 1.794698 | <a href="https://www.genecards.org/cgi-bin/carddisp.pl?gene=EIF4H">https://www.genecards.org/cgi-bin/carddisp.pl?gene=EIF4H</a>     |
| FSTL4   | Follistatin Like 4                           | Protein Coding | 35 | GC05M133196 | 1.794698 | <a href="https://www.genecards.org/cgi-bin/carddisp.pl?gene=FSTL4">https://www.genecards.org/cgi-bin/carddisp.pl?gene=FSTL4</a>     |
| ANAPC4  | Anaphase Promoting Complex Subunit 4         | Protein Coding | 34 | GC04P025379 | 1.794698 | <a href="https://www.genecards.org/cgi-bin/carddisp.pl?gene=ANAPC4">https://www.genecards.org/cgi-bin/carddisp.pl?gene=ANAPC4</a>   |
| CREBBP  | CREB Binding Protein                         | Protein Coding | 50 | GC16M007298 | 1.792465 | <a href="https://www.genecards.org/cgi-bin/carddisp.pl?gene=CREBBP">https://www.genecards.org/cgi-bin/carddisp.pl?gene=CREBBP</a>   |
| MIR193A | MicroRNA 193a                                | RNA Gene       | 20 | GC17P031559 | 1.790309 | <a href="https://www.genecards.org/cgi-bin/carddisp.pl?gene=MIR193A">https://www.genecards.org/cgi-bin/carddisp.pl?gene=MIR193A</a> |
| DEFA3   | Defensin Alpha 3                             | Protein Coding | 36 | GC08M007015 | 1.784046 | <a href="https://www.genecards.org/cgi-bin/carddisp.pl?gene=DEFA3">https://www.genecards.org/cgi-bin/carddisp.pl?gene=DEFA3</a>     |
| MC2R    | Melanocortin 2 Receptor                      | Protein Coding | 46 | GC18M024785 | 1.783474 | <a href="https://www.genecards.org/cgi-bin/carddisp.pl?gene=MC2R">https://www.genecards.org/cgi-bin/carddisp.pl?gene=MC2R</a>       |
| APOC3   | Apolipoprotein C3                            | Protein Coding | 44 | GC11P116829 | 1.783474 | <a href="https://www.genecards.org/cgi-bin/carddisp.pl?gene=APOC3">https://www.genecards.org/cgi-bin/carddisp.pl?gene=APOC3</a>     |
| SMS     | Spermine Synthase                            | Protein Coding | 42 | GC0XP021958 | 1.783474 | <a href="https://www.genecards.org/cgi-bin/carddisp.pl?gene=SMS">https://www.genecards.org/cgi-bin/carddisp.pl?gene=SMS</a>         |
| MIR29B1 | MicroRNA 29b-1                               | RNA Gene       | 21 | GC07M130877 | 1.783474 | <a href="https://www.genecards.org/cgi-bin/carddisp.pl?gene=MIR29B1">https://www.genecards.org/cgi-bin/carddisp.pl?gene=MIR29B1</a> |
| MIR532  | MicroRNA 532                                 | RNA Gene       | 17 | GC0XP050769 | 1.783474 | <a href="https://www.genecards.org/cgi-bin/carddisp.pl?gene=MIR532">https://www.genecards.org/cgi-bin/carddisp.pl?gene=MIR532</a>   |

|          |                                                     |                |    |             |          |                                                                                                                                              |
|----------|-----------------------------------------------------|----------------|----|-------------|----------|----------------------------------------------------------------------------------------------------------------------------------------------|
|          |                                                     |                |    |             |          | <a href="http://www.ncbi.nlm.nih.gov/ncbi/cdd/bin/carddisp.pl?gene=MIR532">bin/carddisp.pl?gene=MIR532</a>                                   |
| MANF     | Mesencephalic Astrocyte Derived Neurotrophic Factor | Protein Coding | 37 | GC03P051385 | 1.778156 | <a href="http://www.ncbi.nlm.nih.gov/ncbi/cdd/bin/carddisp.pl?gene=MANF">https://www.genecards.org/cgi-bin/carddisp.pl?gene=MANF</a>         |
| MIR26B   | MicroRNA 26b                                        | RNA Gene       | 22 | GC02P218402 | 1.778156 | <a href="http://www.ncbi.nlm.nih.gov/ncbi/cdd/bin/carddisp.pl?gene=MIR26B">https://www.genecards.org/cgi-bin/carddisp.pl?gene=MIR26B</a>     |
| AGT      | Angiotensinogen                                     | Protein Coding | 47 | GC01M230702 | 1.774172 | <a href="http://www.ncbi.nlm.nih.gov/ncbi/cdd/bin/carddisp.pl?gene=AGT">https://www.genecards.org/cgi-bin/carddisp.pl?gene=AGT</a>           |
| CCL14    | C-C Motif Chemokine Ligand 14                       | Protein Coding | 34 | GC17M041940 | 1.773492 | <a href="http://www.ncbi.nlm.nih.gov/ncbi/cdd/bin/carddisp.pl?gene=CCL14">https://www.genecards.org/cgi-bin/carddisp.pl?gene=CCL14</a>       |
| TFF3     | Trefoil Factor 3                                    | Protein Coding | 40 | GC21M042311 | 1.772983 | <a href="http://www.ncbi.nlm.nih.gov/ncbi/cdd/bin/carddisp.pl?gene=TFF3">https://www.genecards.org/cgi-bin/carddisp.pl?gene=TFF3</a>         |
| CLEC2D   | C-Type Lectin Domain Family 2 Member D              | Protein Coding | 37 | GC12P021193 | 1.771824 | <a href="http://www.ncbi.nlm.nih.gov/ncbi/cdd/bin/carddisp.pl?gene=CLEC2D">https://www.genecards.org/cgi-bin/carddisp.pl?gene=CLEC2D</a>     |
| SELENO S | Selenoprotein S                                     | Protein Coding | 30 | GC15M117315 | 1.771824 | <a href="http://www.ncbi.nlm.nih.gov/ncbi/cdd/bin/carddisp.pl?gene=SELENO S">https://www.genecards.org/cgi-bin/carddisp.pl?gene=SELENO S</a> |
| CPOX     | Coproporphyrinogen Oxidase                          | Protein Coding | 42 | GC03M098576 | 1.770074 | <a href="http://www.ncbi.nlm.nih.gov/ncbi/cdd/bin/carddisp.pl?gene=CPOX">https://www.genecards.org/cgi-bin/carddisp.pl?gene=CPOX</a>         |
| FUT1     | Fucosyltransferase 1 (H Blood Group)                | Protein Coding | 39 | GC19M048748 | 1.769892 | <a href="http://www.ncbi.nlm.nih.gov/ncbi/cdd/bin/carddisp.pl?gene=FUT1">https://www.genecards.org/cgi-bin/carddisp.pl?gene=FUT1</a>         |
| BDP1P    | B Double Prime 1 Pseudogene                         | Pseudo gene    | 8  | GC18M077447 | 1.76978  | <a href="http://www.ncbi.nlm.nih.gov/ncbi/cdd/bin/carddisp.pl?gene=BDP1P">https://www.genecards.org/cgi-bin/carddisp.pl?gene=BDP1P</a>       |
| RPS26    | Ribosomal Protein S26                               | Protein Coding | 41 | GC12P056043 | 1.764588 | <a href="http://www.ncbi.nlm.nih.gov/ncbi/cdd/bin/carddisp.pl?gene=RPS26">https://www.genecards.org/cgi-bin/carddisp.pl?gene=RPS26</a>       |
| TSC22D3  | TSC22 Domain Family Member 3                        | Protein Coding | 39 | GC0XM107713 | 1.761598 | <a href="http://www.ncbi.nlm.nih.gov/ncbi/cdd/bin/carddisp.pl?gene=TSC22D3">https://www.genecards.org/cgi-bin/carddisp.pl?gene=TSC22D3</a>   |
| KRT8     | Keratin 8                                           | Protein Coding | 45 | GC12M052897 | 1.760741 | <a href="http://www.ncbi.nlm.nih.gov/ncbi/cdd/bin/carddisp.pl?gene=KRT8">https://www.genecards.org/cgi-bin/carddisp.pl?gene=KRT8</a>         |

|         |                                            |                |    |             |          |                                                                                                                                     |
|---------|--------------------------------------------|----------------|----|-------------|----------|-------------------------------------------------------------------------------------------------------------------------------------|
| AFF2    | AF4/FMR2 Family Member 2                   | Protein Coding | 41 | GC0XP148500 | 1.760741 | <a href="https://www.genecards.org/cgi-bin/carddisp.pl?gene=AFF2">https://www.genecards.org/cgi-bin/carddisp.pl?gene=AFF2</a>       |
| ASRGL1  | Asparaginase And Isoaspartyl Peptidase 1   | Protein Coding | 40 | GC11P062337 | 1.760741 | <a href="https://www.genecards.org/cgi-bin/carddisp.pl?gene=ASRGL1">https://www.genecards.org/cgi-bin/carddisp.pl?gene=ASRGL1</a>   |
| BCL2L2  | BCL2 Like 2                                | Protein Coding | 43 | GC14P032837 | 1.759391 | <a href="https://www.genecards.org/cgi-bin/carddisp.pl?gene=BCL2L2">https://www.genecards.org/cgi-bin/carddisp.pl?gene=BCL2L2</a>   |
| MUSK    | Muscle Associated Receptor Tyrosine Kinase | Protein Coding | 46 | GC09P110668 | 1.759109 | <a href="https://www.genecards.org/cgi-bin/carddisp.pl?gene=MUSK">https://www.genecards.org/cgi-bin/carddisp.pl?gene=MUSK</a>       |
| B4GALT1 | Beta-1,4-Galactosyltransferase 1           | Protein Coding | 44 | GC09M033100 | 1.758877 | <a href="https://www.genecards.org/cgi-bin/carddisp.pl?gene=B4GALT1">https://www.genecards.org/cgi-bin/carddisp.pl?gene=B4GALT1</a> |
| NCR3    | Natural Cytotoxicity Triggering Receptor 3 | Protein Coding | 38 | GC06M031588 | 1.758201 | <a href="https://www.genecards.org/cgi-bin/carddisp.pl?gene=NCR3">https://www.genecards.org/cgi-bin/carddisp.pl?gene=NCR3</a>       |
| CDH5    | Cadherin 5                                 | Protein Coding | 45 | GC16P066366 | 1.757975 | <a href="https://www.genecards.org/cgi-bin/carddisp.pl?gene=CDH5">https://www.genecards.org/cgi-bin/carddisp.pl?gene=CDH5</a>       |
| ID2     | Inhibitor Of DNA Binding 2                 | Protein Coding | 42 | GC02P008678 | 1.757975 | <a href="https://www.genecards.org/cgi-bin/carddisp.pl?gene=ID2">https://www.genecards.org/cgi-bin/carddisp.pl?gene=ID2</a>         |
| SPINK5  | Serine Peptidase Inhibitor Kazal Type 5    | Protein Coding | 41 | GC05P148025 | 1.757052 | <a href="https://www.genecards.org/cgi-bin/carddisp.pl?gene=SPINK5">https://www.genecards.org/cgi-bin/carddisp.pl?gene=SPINK5</a>   |
| RPLP0   | Ribosomal Protein Lateral Stalk Subunit P0 | Protein Coding | 40 | GC12M120196 | 1.75361  | <a href="https://www.genecards.org/cgi-bin/carddisp.pl?gene=RPLP0">https://www.genecards.org/cgi-bin/carddisp.pl?gene=RPLP0</a>     |
| LPXN    | Leupaxin                                   | Protein Coding | 40 | GC11M089460 | 1.751273 | <a href="https://www.genecards.org/cgi-bin/carddisp.pl?gene=LPXN">https://www.genecards.org/cgi-bin/carddisp.pl?gene=LPXN</a>       |
| NTAN1   | N-Terminal Asparagine Amidase              | Protein Coding | 37 | GC16M015037 | 1.751273 | <a href="https://www.genecards.org/cgi-bin/carddisp.pl?gene=NTAN1">https://www.genecards.org/cgi-bin/carddisp.pl?gene=NTAN1</a>     |
| MIR629  | MicroRNA 629                               | RNA Gene       | 19 | GC15M070079 | 1.749573 | <a href="https://www.genecards.org/cgi-bin/carddisp.pl?gene=MIR629">https://www.genecards.org/cgi-bin/carddisp.pl?gene=MIR629</a>   |
| MIR600  | MicroRNA 600                               | RNA Gene       | 15 | GC09M123111 | 1.749573 | <a href="https://www.genecards.org/cgi-bin/carddisp.pl?gene=MIR600">https://www.genecards.org/cgi-bin/carddisp.pl?gene=MIR600</a>   |

|              |                                                                              |                |    |             |          |                                                                                                                                                      |
|--------------|------------------------------------------------------------------------------|----------------|----|-------------|----------|------------------------------------------------------------------------------------------------------------------------------------------------------|
|              |                                                                              |                |    |             |          | <a href="http://www.ncbi.nlm.nih.gov/ncbi/cdd/bin/carddisp.pl?gene=MIR600">bin/carddisp.pl?gene=MIR600</a>                                           |
| CRHR1        | Corticotropin Releasing Hormone Receptor 1                                   | Protein Coding | 42 | GC17P045784 | 1.747556 | <a href="http://www.ncbi.nlm.nih.gov/ncbi/cdd/bin/carddisp.pl?gene=CRHR1">https://www.genecards.org/cgi-bin/carddisp.pl?gene=CRHR1</a>               |
| NLRC4        | NLR Family CARD Domain Containing 4                                          | Protein Coding | 42 | GC02M032224 | 1.743058 | <a href="http://www.ncbi.nlm.nih.gov/ncbi/cdd/bin/carddisp.pl?gene=NLRC4">https://www.genecards.org/cgi-bin/carddisp.pl?gene=NLRC4</a>               |
| TXK          | TXK Tyrosine Kinase                                                          | Protein Coding | 44 | GC04M048066 | 1.742146 | <a href="http://www.ncbi.nlm.nih.gov/ncbi/cdd/bin/carddisp.pl?gene=TXK">https://www.genecards.org/cgi-bin/carddisp.pl?gene=TXK</a>                   |
| RHOD         | Ras Homolog Family Member D                                                  | Protein Coding | 37 | GC11P070125 | 1.741763 | <a href="http://www.ncbi.nlm.nih.gov/ncbi/cdd/bin/carddisp.pl?gene=RHOD">https://www.genecards.org/cgi-bin/carddisp.pl?gene=RHOD</a>                 |
| RPS2P14      | Ribosomal Protein S2 Pseudogene 14                                           | Pseudo gene    | 7  | GC01M113698 | 1.740258 | <a href="http://www.ncbi.nlm.nih.gov/ncbi/cdd/bin/carddisp.pl?gene=RPS2P14">https://www.genecards.org/cgi-bin/carddisp.pl?gene=RPS2P14</a>           |
| LOC102724971 | Putative V-Set And Immunoglobulin Domain-Containing-Like Protein IGHV4OR15-8 | Protein Coding | 5  | GC15M021742 | 1.73744  | <a href="http://www.ncbi.nlm.nih.gov/ncbi/cdd/bin/carddisp.pl?gene=LOC102724971">https://www.genecards.org/cgi-bin/carddisp.pl?gene=LOC102724971</a> |
| ROBO3        | Roundabout Guidance Receptor 3                                               | Protein Coding | 43 | GC11P124865 | 1.73387  | <a href="http://www.ncbi.nlm.nih.gov/ncbi/cdd/bin/carddisp.pl?gene=ROBO3">https://www.genecards.org/cgi-bin/carddisp.pl?gene=ROBO3</a>               |
| MIR424       | MicroRNA 424                                                                 | RNA Gene       | 18 | GC0XM134693 | 1.73387  | <a href="http://www.ncbi.nlm.nih.gov/ncbi/cdd/bin/carddisp.pl?gene=MIR424">https://www.genecards.org/cgi-bin/carddisp.pl?gene=MIR424</a>             |
| MIR188       | MicroRNA 188                                                                 | RNA Gene       | 17 | GC0XP050003 | 1.73387  | <a href="http://www.ncbi.nlm.nih.gov/ncbi/cdd/bin/carddisp.pl?gene=MIR188">https://www.genecards.org/cgi-bin/carddisp.pl?gene=MIR188</a>             |
| PITRM1       | Pitrilysin Metallopeptidase 1                                                | Protein Coding | 40 | GC10M003138 | 1.732475 | <a href="http://www.ncbi.nlm.nih.gov/ncbi/cdd/bin/carddisp.pl?gene=PITRM1">https://www.genecards.org/cgi-bin/carddisp.pl?gene=PITRM1</a>             |
| ASIC3        | Acid Sensing Ion Channel Subunit 3                                           | Protein Coding | 38 | GC07P151048 | 1.730679 | <a href="http://www.ncbi.nlm.nih.gov/ncbi/cdd/bin/carddisp.pl?gene=ASIC3">https://www.genecards.org/cgi-bin/carddisp.pl?gene=ASIC3</a>               |
| CHST4        | Carbohydrate Sulfotransferase 4                                              | Protein Coding | 36 | GC16P072011 | 1.730679 | <a href="http://www.ncbi.nlm.nih.gov/ncbi/cdd/bin/carddisp.pl?gene=CHST4">https://www.genecards.org/cgi-bin/carddisp.pl?gene=CHST4</a>               |
| CTSH         | Cathepsin H                                                                  | Protein Coding | 46 | GC15M090448 | 1.729593 | <a href="http://www.ncbi.nlm.nih.gov/ncbi/cdd/bin/carddisp.pl?gene=CTSH">https://www.genecards.org/cgi-bin/carddisp.pl?gene=CTSH</a>                 |



|              |                                                          |                |    |             |          |                                                                                                                                               |
|--------------|----------------------------------------------------------|----------------|----|-------------|----------|-----------------------------------------------------------------------------------------------------------------------------------------------|
| TRAF3IP2-AS1 | TRAF3IP2 Antisense RNA 1                                 | RNA Gene       | 19 | GC06P111483 | 1.729137 | <a href="https://www.genecards.org/cgi-bin/carddisp.pl?gene=TRAF3IP2-AS1">https://www.genecards.org/cgi-bin/carddisp.pl?gene=TRAF3IP2-AS1</a> |
| CD74         | CD74 Molecule                                            | Protein Coding | 42 | GC05M150378 | 1.729081 | <a href="https://www.genecards.org/cgi-bin/carddisp.pl?gene=CD74">https://www.genecards.org/cgi-bin/carddisp.pl?gene=CD74</a>                 |
| MOCOS        | Molybdenum Cofactor Sulfurase                            | Protein Coding | 40 | GC18P036187 | 1.726709 | <a href="https://www.genecards.org/cgi-bin/carddisp.pl?gene=MOCOS">https://www.genecards.org/cgi-bin/carddisp.pl?gene=MOCOS</a>               |
| MFGE8        | Milk Fat Globule EGF And Factor V/VIII Domain Containing | Protein Coding | 42 | GC15M088898 | 1.725653 | <a href="https://www.genecards.org/cgi-bin/carddisp.pl?gene=MFGE8">https://www.genecards.org/cgi-bin/carddisp.pl?gene=MFGE8</a>               |
| GNS          | Glucosamine (N-Acetyl)-6-Sulfatase                       | Protein Coding | 43 | GC12M064713 | 1.724605 | <a href="https://www.genecards.org/cgi-bin/carddisp.pl?gene=GNS">https://www.genecards.org/cgi-bin/carddisp.pl?gene=GNS</a>                   |
| SIRT5        | Sirtuin 5                                                | Protein Coding | 44 | GC06P013574 | 1.72418  | <a href="https://www.genecards.org/cgi-bin/carddisp.pl?gene=SIRT5">https://www.genecards.org/cgi-bin/carddisp.pl?gene=SIRT5</a>               |
| SLC39A8      | Solute Carrier Family 39 Member 8                        | Protein Coding | 42 | GC04M102252 | 1.719299 | <a href="https://www.genecards.org/cgi-bin/carddisp.pl?gene=SLC39A8">https://www.genecards.org/cgi-bin/carddisp.pl?gene=SLC39A8</a>           |
| NFATC2       | Nuclear Factor Of Activated T Cells 2                    | Protein Coding | 42 | GC20M051386 | 1.718933 | <a href="https://www.genecards.org/cgi-bin/carddisp.pl?gene=NFATC2">https://www.genecards.org/cgi-bin/carddisp.pl?gene=NFATC2</a>             |
| DNAJA2       | DnaJ Heat Shock Protein Family (Hsp40) Member A2         | Protein Coding | 39 | GC16M046955 | 1.718933 | <a href="https://www.genecards.org/cgi-bin/carddisp.pl?gene=DNAJA2">https://www.genecards.org/cgi-bin/carddisp.pl?gene=DNAJA2</a>             |
| SLC2A1       | Solute Carrier Family 2 Member 1                         | Protein Coding | 50 | GC01M042925 | 1.718165 | <a href="https://www.genecards.org/cgi-bin/carddisp.pl?gene=SLC2A1">https://www.genecards.org/cgi-bin/carddisp.pl?gene=SLC2A1</a>             |
| SLC7A5       | Solute Carrier Family 7 Member 5                         | Protein Coding | 43 | GC16M087830 | 1.715385 | <a href="https://www.genecards.org/cgi-bin/carddisp.pl?gene=SLC7A5">https://www.genecards.org/cgi-bin/carddisp.pl?gene=SLC7A5</a>             |
| MAF          | MAF BZIP Transcription Factor                            | Protein Coding | 44 | GC16M079204 | 1.714878 | <a href="https://www.genecards.org/cgi-bin/carddisp.pl?gene=MAF">https://www.genecards.org/cgi-bin/carddisp.pl?gene=MAF</a>                   |
| DLL1         | Delta Like Canonical Notch Ligand 1                      | Protein Coding | 44 | GC06M170282 | 1.713073 | <a href="https://www.genecards.org/cgi-bin/carddisp.pl?gene=DLL1">https://www.genecards.org/cgi-bin/carddisp.pl?gene=DLL1</a>                 |
| SSRP1        | Structure Specific Recognition Protein 1                 | Protein Coding | 39 | GC11M089441 | 1.712    | <a href="https://www.genecards.org/cgi-">https://www.genecards.org/cgi-</a>                                                                   |

|         |                                            |                |    |              |           |                                                                                                                                     |
|---------|--------------------------------------------|----------------|----|--------------|-----------|-------------------------------------------------------------------------------------------------------------------------------------|
|         |                                            |                |    |              |           | <a href="#">bin/carddisp.pl?gene=SSRP1</a>                                                                                          |
| BMPR2   | Bone Morphogenetic Protein Receptor Type 2 | Protein Coding | 48 | GC02P 202376 | 1.711 393 | <a href="https://www.genecards.org/cgi-bin/carddisp.pl?gene=BMPR2">https://www.genecards.org/cgi-bin/carddisp.pl?gene=BMPR2</a>     |
| HSF1    | Heat Shock Transcription Factor 1          | Protein Coding | 43 | GC08P 144291 | 1.707 303 | <a href="https://www.genecards.org/cgi-bin/carddisp.pl?gene=HSF1">https://www.genecards.org/cgi-bin/carddisp.pl?gene=HSF1</a>       |
| CD96    | CD96 Molecule                              | Protein Coding | 42 | GC03P 111292 | 1.707 303 | <a href="https://www.genecards.org/cgi-bin/carddisp.pl?gene=CD96">https://www.genecards.org/cgi-bin/carddisp.pl?gene=CD96</a>       |
| MIR26A1 | MicroRNA 26a-1                             | RNA Gene       | 21 | GC03P 037969 | 1.707 303 | <a href="https://www.genecards.org/cgi-bin/carddisp.pl?gene=MIR26A1">https://www.genecards.org/cgi-bin/carddisp.pl?gene=MIR26A1</a> |
| ST2     | Suppression Of Tumorigenicity 2            | Genetic Locus  | 7  | GC11U 990127 | 1.707 303 | <a href="https://www.genecards.org/cgi-bin/carddisp.pl?gene=ST2">https://www.genecards.org/cgi-bin/carddisp.pl?gene=ST2</a>         |
| GLS     | Glutaminase                                | Protein Coding | 47 | GC02P 190880 | 1.706 537 | <a href="https://www.genecards.org/cgi-bin/carddisp.pl?gene=GLS">https://www.genecards.org/cgi-bin/carddisp.pl?gene=GLS</a>         |
| MPPE1   | Metallophosphoesterase 1                   | Protein Coding | 37 | GC18M 024771 | 1.706 537 | <a href="https://www.genecards.org/cgi-bin/carddisp.pl?gene=MPPE1">https://www.genecards.org/cgi-bin/carddisp.pl?gene=MPPE1</a>     |
| RBM17   | RNA Binding Motif Protein 17               | Protein Coding | 37 | GC10P 006089 | 1.706 537 | <a href="https://www.genecards.org/cgi-bin/carddisp.pl?gene=RBM17">https://www.genecards.org/cgi-bin/carddisp.pl?gene=RBM17</a>     |
| CEP192  | Centrosomal Protein 192                    | Protein Coding | 36 | GC18P 017459 | 1.706 537 | <a href="https://www.genecards.org/cgi-bin/carddisp.pl?gene=CEP192">https://www.genecards.org/cgi-bin/carddisp.pl?gene=CEP192</a>   |
| CEP76   | Centrosomal Protein 76                     | Protein Coding | 35 | GC18M 024777 | 1.706 537 | <a href="https://www.genecards.org/cgi-bin/carddisp.pl?gene=CEP76">https://www.genecards.org/cgi-bin/carddisp.pl?gene=CEP76</a>     |
| RAVER1  | Ribonucleoprotein, PTB Binding 1           | Protein Coding | 33 | GC19M 010316 | 1.706 537 | <a href="https://www.genecards.org/cgi-bin/carddisp.pl?gene=RAVER1">https://www.genecards.org/cgi-bin/carddisp.pl?gene=RAVER1</a>   |
| CCDC116 | Coiled-Coil Domain Containing 116          | Protein Coding | 32 | GC22P 037047 | 1.706 537 | <a href="https://www.genecards.org/cgi-bin/carddisp.pl?gene=CCDC116">https://www.genecards.org/cgi-bin/carddisp.pl?gene=CCDC116</a> |
| PRR5L   | Proline Rich 5 Like                        | Protein Coding | 30 | GC11P 036297 | 1.706 537 | <a href="https://www.genecards.org/cgi-bin/carddisp.pl?gene=PRR5L">https://www.genecards.org/cgi-bin/carddisp.pl?gene=PRR5L</a>     |

|                 |                                                  |                |    |             |          |                                                                                                                                                     |
|-----------------|--------------------------------------------------|----------------|----|-------------|----------|-----------------------------------------------------------------------------------------------------------------------------------------------------|
| RIMBP3C         | RIMS Binding Protein 3C                          | Protein Coding | 26 | GC22M023542 | 1.706537 | <a href="https://www.genecards.org/cgi-bin/carddisp.pl?gene=RIMBP3C">https://www.genecards.org/cgi-bin/carddisp.pl?gene=RIMBP3C</a>                 |
| PI4KAP2         | Phosphatidylinositol 4-Kinase Alpha Pseudogene 2 | Pseudo gene    | 22 | GC22M021472 | 1.706537 | <a href="https://www.genecards.org/cgi-bin/carddisp.pl?gene=PI4KAP2">https://www.genecards.org/cgi-bin/carddisp.pl?gene=PI4KAP2</a>                 |
| THAP7-AS1       | THAP7 Antisense RNA 1                            | RNA Gene       | 15 | GC22P035904 | 1.706537 | <a href="https://www.genecards.org/cgi-bin/carddisp.pl?gene=THAP7-AS1">https://www.genecards.org/cgi-bin/carddisp.pl?gene=THAP7-AS1</a>             |
| IGLV5-52        | Immunoglobulin Lambda Variable 5-52              | Protein Coding | 13 | GC22P022318 | 1.706537 | <a href="https://www.genecards.org/cgi-bin/carddisp.pl?gene=IGLV5-52">https://www.genecards.org/cgi-bin/carddisp.pl?gene=IGLV5-52</a>               |
| ABHD17AP4       | ABHD17A Pseudogene 4                             | Pseudo gene    | 10 | GC22M020667 | 1.706537 | <a href="https://www.genecards.org/cgi-bin/carddisp.pl?gene=ABHD17AP4">https://www.genecards.org/cgi-bin/carddisp.pl?gene=ABHD17AP4</a>             |
| STAT4-AS1       | STAT4 Antisense RNA 1                            | RNA Gene       | 10 | GC02P191023 | 1.706537 | <a href="https://www.genecards.org/cgi-bin/carddisp.pl?gene=STAT4-AS1">https://www.genecards.org/cgi-bin/carddisp.pl?gene=STAT4-AS1</a>             |
| TSBP1-AS1       | TSBP1 And BTNL2 Antisense RNA 1                  | RNA Gene       | 10 | GC06P087405 | 1.706537 | <a href="https://www.genecards.org/cgi-bin/carddisp.pl?gene=TSBP1-AS1">https://www.genecards.org/cgi-bin/carddisp.pl?gene=TSBP1-AS1</a>             |
| ENSG00000234630 | Novel Transcript                                 | RNA Gene       | 9  | GC22P035947 | 1.706537 | <a href="https://www.genecards.org/cgi-bin/carddisp.pl?gene=ENSG00000234630">https://www.genecards.org/cgi-bin/carddisp.pl?gene=ENSG00000234630</a> |
| ENSG00000267199 | Novel Transcript, Antisense SPIRE1               | RNA Gene       | 9  | GC18P017448 | 1.706537 | <a href="https://www.genecards.org/cgi-bin/carddisp.pl?gene=ENSG00000267199">https://www.genecards.org/cgi-bin/carddisp.pl?gene=ENSG00000267199</a> |
| ENSG00000267480 | Novel Transcript, Antisense IMPA2                | RNA Gene       | 9  | GC18M024891 | 1.706537 | <a href="https://www.genecards.org/cgi-bin/carddisp.pl?gene=ENSG00000267480">https://www.genecards.org/cgi-bin/carddisp.pl?gene=ENSG00000267480</a> |
| HSALNG0120134   |                                                  | RNA Gene       | 5  | GC18P017594 | 1.706537 | <a href="https://www.genecards.org/cgi-bin/carddisp.pl?gene=HSALNG0120134">https://www.genecards.org/cgi-bin/carddisp.pl?gene=HSALNG0120134</a>     |
| HSALNG0120135   |                                                  | RNA Gene       | 5  | GC18M024927 | 1.706537 | <a href="https://www.genecards.org/cgi-bin/carddisp.pl?gene=HSALNG0120135">https://www.genecards.org/cgi-bin/carddisp.pl?gene=HSALNG0120135</a>     |
| lnc-SEH1L-5     |                                                  | RNA Gene       | 5  | GC18P017450 | 1.706537 | <a href="https://www.genecards.org/cgi-bin/carddisp.pl?gene=lnc-SEH1L-5">https://www.genecards.org/cgi-bin/carddisp.pl?gene=lnc-SEH1L-5</a>         |
| piR-53431-298   |                                                  | RNA Gene       | 5  | GC18P017731 | 1.706537 | <a href="https://www.genecards.org/cgi-bin/carddisp.pl?gene=piR-53431-298">https://www.genecards.org/cgi-bin/carddisp.pl?gene=piR-53431-298</a>     |

|               |                                                                    |                |    |             |          |                                                                                                                                                          |
|---------------|--------------------------------------------------------------------|----------------|----|-------------|----------|----------------------------------------------------------------------------------------------------------------------------------------------------------|
|               |                                                                    |                |    |             |          | <a href="http://www.ncbi.nlm.nih.gov/ncic/cgibin/cgicarddisp.pl?gene=piR-53431-298">bin/carddisp.pl?gene=piR-53431-298</a>                               |
| lnc-ICAM3-1   |                                                                    | RNA Gene       | 4  | GC19M010402 | 1.706537 | <a href="http://www.ncbi.nlm.nih.gov/ncic/cgibin/cgicarddisp.pl?gene=lnc-ICAM3-1">https://www.genecards.org/cgi-bin/carddisp.pl?gene=lnc-ICAM3-1</a>     |
| piR-61101-324 |                                                                    | RNA Gene       | 4  | GC19P010348 | 1.706537 | <a href="http://www.ncbi.nlm.nih.gov/ncic/cgibin/cgicarddisp.pl?gene=piR-61101-324">https://www.genecards.org/cgi-bin/carddisp.pl?gene=piR-61101-324</a> |
| lnc-ICAM3-2   |                                                                    | RNA Gene       | 3  | GC19M010354 | 1.706537 | <a href="http://www.ncbi.nlm.nih.gov/ncic/cgibin/cgicarddisp.pl?gene=lnc-ICAM3-2">https://www.genecards.org/cgi-bin/carddisp.pl?gene=lnc-ICAM3-2</a>     |
| EREG          | Epiregulin                                                         | Protein Coding | 41 | GC04P074366 | 1.701794 | <a href="http://www.ncbi.nlm.nih.gov/ncic/cgibin/cgicarddisp.pl?gene=EREG">https://www.genecards.org/cgi-bin/carddisp.pl?gene=EREG</a>                   |
| LAP3          | Leucine Aminopeptidase 3                                           | Protein Coding | 41 | GC04P018237 | 1.698339 | <a href="http://www.ncbi.nlm.nih.gov/ncic/cgibin/cgicarddisp.pl?gene=LAP3">https://www.genecards.org/cgi-bin/carddisp.pl?gene=LAP3</a>                   |
| PER2          | Period Circadian Regulator 2                                       | Protein Coding | 42 | GC02M238244 | 1.697734 | <a href="http://www.ncbi.nlm.nih.gov/ncic/cgibin/cgicarddisp.pl?gene=PER2">https://www.genecards.org/cgi-bin/carddisp.pl?gene=PER2</a>                   |
| MIRLET7A1     | MicroRNA Let-7a-1                                                  | RNA Gene       | 21 | GC09P094175 | 1.697734 | <a href="http://www.ncbi.nlm.nih.gov/ncic/cgibin/cgicarddisp.pl?gene=MIRLET7A1">https://www.genecards.org/cgi-bin/carddisp.pl?gene=MIRLET7A1</a>         |
| HLA-DRB2      | Major Histocompatibility Complex, Class II, DR Beta 2 (Pseudogene) | Pseudo gene    | 10 | GC06Mn03753 | 1.697423 | <a href="http://www.ncbi.nlm.nih.gov/ncic/cgibin/cgicarddisp.pl?gene=HLA-DRB2">https://www.genecards.org/cgi-bin/carddisp.pl?gene=HLA-DRB2</a>           |
| SERPINA4      | Serpin Family A Member 4                                           | Protein Coding | 41 | GC14P094561 | 1.697273 | <a href="http://www.ncbi.nlm.nih.gov/ncic/cgibin/cgicarddisp.pl?gene=SERPINA4">https://www.genecards.org/cgi-bin/carddisp.pl?gene=SERPINA4</a>           |
| DNM1L         | Dynamin 1 Like                                                     | Protein Coding | 46 | GC12P032679 | 1.696452 | <a href="http://www.ncbi.nlm.nih.gov/ncic/cgibin/cgicarddisp.pl?gene=DNM1L">https://www.genecards.org/cgi-bin/carddisp.pl?gene=DNM1L</a>                 |
| FOXM1         | Forkhead Box M1                                                    | Protein Coding | 42 | GC12M002857 | 1.696452 | <a href="http://www.ncbi.nlm.nih.gov/ncic/cgibin/cgicarddisp.pl?gene=FOXM1">https://www.genecards.org/cgi-bin/carddisp.pl?gene=FOXM1</a>                 |
| RASGRF1       | Ras Protein Specific Guanine Nucleotide Releasing Factor 1         | Protein Coding | 40 | GC15M078959 | 1.696452 | <a href="http://www.ncbi.nlm.nih.gov/ncic/cgibin/cgicarddisp.pl?gene=RASGRF1">https://www.genecards.org/cgi-bin/carddisp.pl?gene=RASGRF1</a>             |
| SNRPA         | Small Nuclear Ribonucleoprotein Polypeptide A                      | Protein Coding | 39 | GC19P040750 | 1.696393 | <a href="http://www.ncbi.nlm.nih.gov/ncic/cgibin/cgicarddisp.pl?gene=SNRPA">https://www.genecards.org/cgi-bin/carddisp.pl?gene=SNRPA</a>                 |

|           |                                                             |                |    |             |          |                                                                                                                                         |
|-----------|-------------------------------------------------------------|----------------|----|-------------|----------|-----------------------------------------------------------------------------------------------------------------------------------------|
| SLC22A1   | Solute Carrier Family 22 Member 1                           | Protein Coding | 42 | GC06P160121 | 1.696227 | <a href="https://www.genecards.org/cgi-bin/carddisp.pl?gene=SLC22A1">https://www.genecards.org/cgi-bin/carddisp.pl?gene=SLC22A1</a>     |
| LINC02381 | Long Intergenic Non-Protein Coding RNA 2381                 | RNA Gene       | 10 | GC12P055052 | 1.696227 | <a href="https://www.genecards.org/cgi-bin/carddisp.pl?gene=LINC02381">https://www.genecards.org/cgi-bin/carddisp.pl?gene=LINC02381</a> |
| IL17RB    | Interleukin 17 Receptor B                                   | Protein Coding | 40 | GC03P053855 | 1.694728 | <a href="https://www.genecards.org/cgi-bin/carddisp.pl?gene=IL17RB">https://www.genecards.org/cgi-bin/carddisp.pl?gene=IL17RB</a>       |
| PLCG2     | Phospholipase C Gamma 2                                     | Protein Coding | 50 | GC16P081773 | 1.689247 | <a href="https://www.genecards.org/cgi-bin/carddisp.pl?gene=PLCG2">https://www.genecards.org/cgi-bin/carddisp.pl?gene=PLCG2</a>         |
| CTSS      | Cathepsin S                                                 | Protein Coding | 44 | GC01M150730 | 1.687668 | <a href="https://www.genecards.org/cgi-bin/carddisp.pl?gene=CTSS">https://www.genecards.org/cgi-bin/carddisp.pl?gene=CTSS</a>           |
| IRF9      | Interferon Regulatory Factor 9                              | Protein Coding | 42 | GC14P024161 | 1.687188 | <a href="https://www.genecards.org/cgi-bin/carddisp.pl?gene=IRF9">https://www.genecards.org/cgi-bin/carddisp.pl?gene=IRF9</a>           |
| GP2       | Glycoprotein 2                                              | Protein Coding | 40 | GC16M020309 | 1.687188 | <a href="https://www.genecards.org/cgi-bin/carddisp.pl?gene=GP2">https://www.genecards.org/cgi-bin/carddisp.pl?gene=GP2</a>             |
| ITGAE     | Integrin Subunit Alpha E                                    | Protein Coding | 39 | GC17M004158 | 1.687188 | <a href="https://www.genecards.org/cgi-bin/carddisp.pl?gene=ITGAE">https://www.genecards.org/cgi-bin/carddisp.pl?gene=ITGAE</a>         |
| CTBS      | Chitobiase                                                  | Protein Coding | 38 | GC01M084549 | 1.687188 | <a href="https://www.genecards.org/cgi-bin/carddisp.pl?gene=CTBS">https://www.genecards.org/cgi-bin/carddisp.pl?gene=CTBS</a>           |
| IFI27     | Interferon Alpha Inducible Protein 27                       | Protein Coding | 38 | GC14P094104 | 1.687188 | <a href="https://www.genecards.org/cgi-bin/carddisp.pl?gene=IFI27">https://www.genecards.org/cgi-bin/carddisp.pl?gene=IFI27</a>         |
| MIR495    | MicroRNA 495                                                | RNA Gene       | 17 | GC14P109998 | 1.687188 | <a href="https://www.genecards.org/cgi-bin/carddisp.pl?gene=MIR495">https://www.genecards.org/cgi-bin/carddisp.pl?gene=MIR495</a>       |
| THRIL     | TNF And HNRNPL Related Immunoregulatory Long Non-Coding RNA | RNA Gene       | 12 | GC12M125025 | 1.687188 | <a href="https://www.genecards.org/cgi-bin/carddisp.pl?gene=THRIL">https://www.genecards.org/cgi-bin/carddisp.pl?gene=THRIL</a>         |
| FGF7      | Fibroblast Growth Factor 7                                  | Protein Coding | 40 | GC15P049423 | 1.685435 | <a href="https://www.genecards.org/cgi-bin/carddisp.pl?gene=FGF7">https://www.genecards.org/cgi-bin/carddisp.pl?gene=FGF7</a>           |
| ITIH2     | Inter-Alpha-Trypsin Inhibitor Heavy Chain 2                 | Protein Coding | 40 | GC10P007703 | 1.684724 | <a href="https://www.genecards.org/cgi-">https://www.genecards.org/cgi-</a>                                                             |

|           |                                                |                |    |             |          |                                                                                                                                                        |
|-----------|------------------------------------------------|----------------|----|-------------|----------|--------------------------------------------------------------------------------------------------------------------------------------------------------|
|           |                                                |                |    |             |          | <a href="http://www.ncbi.nlm.nih.gov/ncbi/cdd/bin/carddisp.pl?gene=ITI2">bin/carddisp.pl?gene=ITI2</a>                                                 |
| LTA4H     | Leukotriene A4 Hydrolase                       | Protein Coding | 44 | GC12M096000 | 1.684635 | <a href="http://www.ncbi.nlm.nih.gov/ncbi/cdd/bin/carddisp.pl?gene=LTA4H">https://www.ncbi.nlm.nih.gov/ncbi/cdd/bin/carddisp.pl?gene=LTA4H</a>         |
| STK16     | Serine/Threonine Kinase 16                     | Protein Coding | 39 | GC02P219248 | 1.681913 | <a href="http://www.ncbi.nlm.nih.gov/ncbi/cdd/bin/carddisp.pl?gene=STK16">https://www.ncbi.nlm.nih.gov/ncbi/cdd/bin/carddisp.pl?gene=STK16</a>         |
| WBP1      | WW Domain Binding Protein 1                    | Protein Coding | 33 | GC02P074458 | 1.678863 | <a href="http://www.ncbi.nlm.nih.gov/ncbi/cdd/bin/carddisp.pl?gene=WBP1">https://www.ncbi.nlm.nih.gov/ncbi/cdd/bin/carddisp.pl?gene=WBP1</a>           |
| FGB       | Fibrinogen Beta Chain                          | Protein Coding | 46 | GC04P154595 | 1.67643  | <a href="http://www.ncbi.nlm.nih.gov/ncbi/cdd/bin/carddisp.pl?gene=FGB">https://www.ncbi.nlm.nih.gov/ncbi/cdd/bin/carddisp.pl?gene=FGB</a>             |
| KLF5      | Kruppel Like Factor 5                          | Protein Coding | 44 | GC13P073054 | 1.67643  | <a href="http://www.ncbi.nlm.nih.gov/ncbi/cdd/bin/carddisp.pl?gene=KLF5">https://www.ncbi.nlm.nih.gov/ncbi/cdd/bin/carddisp.pl?gene=KLF5</a>           |
| MMP28     | Matrix Metalloproteinase 28                    | Protein Coding | 36 | GC17M035756 | 1.67643  | <a href="http://www.ncbi.nlm.nih.gov/ncbi/cdd/bin/carddisp.pl?gene=MMP28">https://www.ncbi.nlm.nih.gov/ncbi/cdd/bin/carddisp.pl?gene=MMP28</a>         |
| CNNM3-DT  | CNNM3 Divergent Transcript                     | RNA Gene       | 9  | GC02M098269 | 1.67643  | <a href="http://www.ncbi.nlm.nih.gov/ncbi/cdd/bin/carddisp.pl?gene=CNNM3-DT">https://www.ncbi.nlm.nih.gov/ncbi/cdd/bin/carddisp.pl?gene=CNNM3-DT</a>   |
| ARNT      | Aryl Hydrocarbon Receptor Nuclear Translocator | Protein Coding | 42 | GC01M150809 | 1.674134 | <a href="http://www.ncbi.nlm.nih.gov/ncbi/cdd/bin/carddisp.pl?gene=ARNT">https://www.ncbi.nlm.nih.gov/ncbi/cdd/bin/carddisp.pl?gene=ARNT</a>           |
| FGF5      | Fibroblast Growth Factor 5                     | Protein Coding | 42 | GC04P080266 | 1.674134 | <a href="http://www.ncbi.nlm.nih.gov/ncbi/cdd/bin/carddisp.pl?gene=FGF5">https://www.ncbi.nlm.nih.gov/ncbi/cdd/bin/carddisp.pl?gene=FGF5</a>           |
| NR2C2     | Nuclear Receptor Subfamily 2 Group C Member 2  | Protein Coding | 42 | GC03P014947 | 1.674134 | <a href="http://www.ncbi.nlm.nih.gov/ncbi/cdd/bin/carddisp.pl?gene=NR2C2">https://www.ncbi.nlm.nih.gov/ncbi/cdd/bin/carddisp.pl?gene=NR2C2</a>         |
| GPANK1    | G-Patch Domain And Ankyrin Repeats 1           | Protein Coding | 32 | GC06M065962 | 1.672641 | <a href="http://www.ncbi.nlm.nih.gov/ncbi/cdd/bin/carddisp.pl?gene=GPANK1">https://www.ncbi.nlm.nih.gov/ncbi/cdd/bin/carddisp.pl?gene=GPANK1</a>       |
| AHNAK     | AHNAK Nucleoprotein                            | Protein Coding | 37 | GC11M089610 | 1.664649 | <a href="http://www.ncbi.nlm.nih.gov/ncbi/cdd/bin/carddisp.pl?gene=AHNAK">https://www.ncbi.nlm.nih.gov/ncbi/cdd/bin/carddisp.pl?gene=AHNAK</a>         |
| SERPINA12 | Serpin Family A Member 12                      | Protein Coding | 38 | GC14M094487 | 1.661815 | <a href="http://www.ncbi.nlm.nih.gov/ncbi/cdd/bin/carddisp.pl?gene=SERPINA12">https://www.ncbi.nlm.nih.gov/ncbi/cdd/bin/carddisp.pl?gene=SERPINA12</a> |

|          |                                                  |                |    |             |          |                                                                                                                                       |
|----------|--------------------------------------------------|----------------|----|-------------|----------|---------------------------------------------------------------------------------------------------------------------------------------|
| BCHE     | Butyrylcholinesterase                            | Protein Coding | 49 | GC03M165772 | 1.660317 | <a href="https://www.genecards.org/cgi-bin/carddisp.pl?gene=BCHE">https://www.genecards.org/cgi-bin/carddisp.pl?gene=BCHE</a>         |
| CETP     | Cholesteryl Ester Transfer Protein               | Protein Coding | 46 | GC16P056961 | 1.660317 | <a href="https://www.genecards.org/cgi-bin/carddisp.pl?gene=CETP">https://www.genecards.org/cgi-bin/carddisp.pl?gene=CETP</a>         |
| CPT1A    | Carnitine Palmitoyltransferase 1A                | Protein Coding | 46 | GC11M068754 | 1.660317 | <a href="https://www.genecards.org/cgi-bin/carddisp.pl?gene=CPT1A">https://www.genecards.org/cgi-bin/carddisp.pl?gene=CPT1A</a>       |
| PLTP     | Phospholipid Transfer Protein                    | Protein Coding | 43 | GC20M045898 | 1.660317 | <a href="https://www.genecards.org/cgi-bin/carddisp.pl?gene=PLTP">https://www.genecards.org/cgi-bin/carddisp.pl?gene=PLTP</a>         |
| ADIPOR2  | Adiponectin Receptor 2                           | Protein Coding | 41 | GC12P001670 | 1.660317 | <a href="https://www.genecards.org/cgi-bin/carddisp.pl?gene=ADIPOR2">https://www.genecards.org/cgi-bin/carddisp.pl?gene=ADIPOR2</a>   |
| REG1A    | Regenerating Family Member 1 Alpha               | Protein Coding | 40 | GC02P079120 | 1.660317 | <a href="https://www.genecards.org/cgi-bin/carddisp.pl?gene=REG1A">https://www.genecards.org/cgi-bin/carddisp.pl?gene=REG1A</a>       |
| ATP6V0E2 | ATPase H <sup>+</sup> Transporting V0 Subunit E2 | Protein Coding | 36 | GC07P149873 | 1.660317 | <a href="https://www.genecards.org/cgi-bin/carddisp.pl?gene=ATP6V0E2">https://www.genecards.org/cgi-bin/carddisp.pl?gene=ATP6V0E2</a> |
| MIR25    | MicroRNA 25                                      | RNA Gene       | 21 | GC07M100093 | 1.660317 | <a href="https://www.genecards.org/cgi-bin/carddisp.pl?gene=MIR25">https://www.genecards.org/cgi-bin/carddisp.pl?gene=MIR25</a>       |
| MIR27B   | MicroRNA 27b                                     | RNA Gene       | 21 | GC09P095097 | 1.660317 | <a href="https://www.genecards.org/cgi-bin/carddisp.pl?gene=MIR27B">https://www.genecards.org/cgi-bin/carddisp.pl?gene=MIR27B</a>     |
| MIR378A  | MicroRNA 378a                                    | RNA Gene       | 21 | GC05P149732 | 1.660317 | <a href="https://www.genecards.org/cgi-bin/carddisp.pl?gene=MIR378A">https://www.genecards.org/cgi-bin/carddisp.pl?gene=MIR378A</a>   |
| MIR574   | MicroRNA 574                                     | RNA Gene       | 20 | GC04P038948 | 1.660317 | <a href="https://www.genecards.org/cgi-bin/carddisp.pl?gene=MIR574">https://www.genecards.org/cgi-bin/carddisp.pl?gene=MIR574</a>     |
| MIR224   | MicroRNA 224                                     | RNA Gene       | 18 | GC0XM151958 | 1.660317 | <a href="https://www.genecards.org/cgi-bin/carddisp.pl?gene=MIR224">https://www.genecards.org/cgi-bin/carddisp.pl?gene=MIR224</a>     |
| MIR340   | MicroRNA 340                                     | RNA Gene       | 20 | GC05M180015 | 1.65523  | <a href="https://www.genecards.org/cgi-bin/carddisp.pl?gene=MIR340">https://www.genecards.org/cgi-bin/carddisp.pl?gene=MIR340</a>     |
| MX1      | MX Dynamin Like GTPase 1                         | Protein Coding | 40 | GC21P041420 | 1.654687 | <a href="https://www.genecards.org/cgi-">https://www.genecards.org/cgi-</a>                                                           |

|          |                                                  |                |    |             |          |                                                                                                                                       |
|----------|--------------------------------------------------|----------------|----|-------------|----------|---------------------------------------------------------------------------------------------------------------------------------------|
|          |                                                  |                |    |             |          | <a href="#">bin/carddisp.pl?gene=MX1</a>                                                                                              |
| AGRN     | Agrin                                            | Protein Coding | 44 | GC01P001020 | 1.654424 | <a href="https://www.genecards.org/cgi-bin/carddisp.pl?gene=AGRN">https://www.genecards.org/cgi-bin/carddisp.pl?gene=AGRN</a>         |
| TNXA     | Tenascin XA (Pseudogene)                         | Pseudo gene    | 23 | GC06M065980 | 1.654226 | <a href="https://www.genecards.org/cgi-bin/carddisp.pl?gene=TNXA">https://www.genecards.org/cgi-bin/carddisp.pl?gene=TNXA</a>         |
| RPS6KA3  | Ribosomal Protein S6 Kinase A3                   | Protein Coding | 50 | GC0XM020149 | 1.653955 | <a href="https://www.genecards.org/cgi-bin/carddisp.pl?gene=RPS6KA3">https://www.genecards.org/cgi-bin/carddisp.pl?gene=RPS6KA3</a>   |
| SLIT3    | Slit Guidance Ligand 3                           | Protein Coding | 41 | GC05M168661 | 1.650758 | <a href="https://www.genecards.org/cgi-bin/carddisp.pl?gene=SLIT3">https://www.genecards.org/cgi-bin/carddisp.pl?gene=SLIT3</a>       |
| IDDM8    | Insulin Dependent Diabetes Mellitus 8            | Genetic Locus  | 4  | GC06U990066 | 1.650758 | <a href="https://www.genecards.org/cgi-bin/carddisp.pl?gene=IDDM8">https://www.genecards.org/cgi-bin/carddisp.pl?gene=IDDM8</a>       |
| ADGRG1   | Adhesion G Protein-Coupled Receptor G1           | Protein Coding | 38 | GC16P057610 | 1.648388 | <a href="https://www.genecards.org/cgi-bin/carddisp.pl?gene=ADGRG1">https://www.genecards.org/cgi-bin/carddisp.pl?gene=ADGRG1</a>     |
| OR6C4    | Olfactory Receptor Family 6 Subfamily C Member 4 | Protein Coding | 32 | GC12P055553 | 1.648388 | <a href="https://www.genecards.org/cgi-bin/carddisp.pl?gene=OR6C4">https://www.genecards.org/cgi-bin/carddisp.pl?gene=OR6C4</a>       |
| DEFB1    | Defensin Beta 1                                  | Protein Coding | 38 | GC08M006870 | 1.646858 | <a href="https://www.genecards.org/cgi-bin/carddisp.pl?gene=DEFB1">https://www.genecards.org/cgi-bin/carddisp.pl?gene=DEFB1</a>       |
| C1D      | C1D Nuclear Receptor Corepressor                 | Protein Coding | 38 | GC02M068041 | 1.645422 | <a href="https://www.genecards.org/cgi-bin/carddisp.pl?gene=C1D">https://www.genecards.org/cgi-bin/carddisp.pl?gene=C1D</a>           |
| PLP1     | Proteolipid Protein 1                            | Protein Coding | 41 | GC0XP103773 | 1.644365 | <a href="https://www.genecards.org/cgi-bin/carddisp.pl?gene=PLP1">https://www.genecards.org/cgi-bin/carddisp.pl?gene=PLP1</a>         |
| RPTOR    | Regulatory Associated Protein Of MTOR Complex 1  | Protein Coding | 42 | GC17P080544 | 1.64344  | <a href="https://www.genecards.org/cgi-bin/carddisp.pl?gene=RPTOR">https://www.genecards.org/cgi-bin/carddisp.pl?gene=RPTOR</a>       |
| GBP5     | Guanylate Binding Protein 5                      | Protein Coding | 36 | GC01M089259 | 1.642158 | <a href="https://www.genecards.org/cgi-bin/carddisp.pl?gene=GBP5">https://www.genecards.org/cgi-bin/carddisp.pl?gene=GBP5</a>         |
| SH3PXD2A | SH3 And PX Domains 2A                            | Protein Coding | 38 | GC10M103594 | 1.641088 | <a href="https://www.genecards.org/cgi-bin/carddisp.pl?gene=SH3PXD2A">https://www.genecards.org/cgi-bin/carddisp.pl?gene=SH3PXD2A</a> |



|              |                                                             |                   |    |             |          |                                                                                                                                               |
|--------------|-------------------------------------------------------------|-------------------|----|-------------|----------|-----------------------------------------------------------------------------------------------------------------------------------------------|
| DPP7         | Dipeptidyl Peptidase 7                                      | Protein Coding    | 39 | GC09M137569 | 1.638876 | <a href="https://www.genecards.org/cgi-bin/carddisp.pl?gene=DPP7">https://www.genecards.org/cgi-bin/carddisp.pl?gene=DPP7</a>                 |
| THNSL2       | Threonine Synthase Like 2                                   | Protein Coding    | 33 | GC02P088170 | 1.638876 | <a href="https://www.genecards.org/cgi-bin/carddisp.pl?gene=THNSL2">https://www.genecards.org/cgi-bin/carddisp.pl?gene=THNSL2</a>             |
| TKT          | Transketolase                                               | Protein Coding    | 45 | GC03M053224 | 1.637501 | <a href="https://www.genecards.org/cgi-bin/carddisp.pl?gene=TKT">https://www.genecards.org/cgi-bin/carddisp.pl?gene=TKT</a>                   |
| TOP1         | DNA Topoisomerase I                                         | Protein Coding    | 47 | GC20P041028 | 1.63069  | <a href="https://www.genecards.org/cgi-bin/carddisp.pl?gene=TOP1">https://www.genecards.org/cgi-bin/carddisp.pl?gene=TOP1</a>                 |
| LOC106780803 | Tenascin XB Recombination Region                            | Biological Region | 3  | GC06P085230 | 1.630337 | <a href="https://www.genecards.org/cgi-bin/carddisp.pl?gene=LOC106780803">https://www.genecards.org/cgi-bin/carddisp.pl?gene=LOC106780803</a> |
| LOC106780804 | Tenascin XA (Pseudogene) Recombination Region               | Biological Region | 2  | GC06P085231 | 1.630337 | <a href="https://www.genecards.org/cgi-bin/carddisp.pl?gene=LOC106780804">https://www.genecards.org/cgi-bin/carddisp.pl?gene=LOC106780804</a> |
| IL20RA       | Interleukin 20 Receptor Subunit Alpha                       | Protein Coding    | 36 | GC06M136999 | 1.629896 | <a href="https://www.genecards.org/cgi-bin/carddisp.pl?gene=IL20RA">https://www.genecards.org/cgi-bin/carddisp.pl?gene=IL20RA</a>             |
| SLC37A1      | Solute Carrier Family 37 Member 1                           | Protein Coding    | 37 | GC21P042571 | 1.626416 | <a href="https://www.genecards.org/cgi-bin/carddisp.pl?gene=SLC37A1">https://www.genecards.org/cgi-bin/carddisp.pl?gene=SLC37A1</a>           |
| SDC4         | Syndecan 4                                                  | Protein Coding    | 42 | GC20M045325 | 1.625002 | <a href="https://www.genecards.org/cgi-bin/carddisp.pl?gene=SDC4">https://www.genecards.org/cgi-bin/carddisp.pl?gene=SDC4</a>                 |
| SELENO N     | Selenoprotein N                                             | Protein Coding    | 32 | GC01P025800 | 1.623947 | <a href="https://www.genecards.org/cgi-bin/carddisp.pl?gene=SELENO N">https://www.genecards.org/cgi-bin/carddisp.pl?gene=SELENO N</a>         |
| CD47         | CD47 Molecule                                               | Protein Coding    | 41 | GC03M108043 | 1.623184 | <a href="https://www.genecards.org/cgi-bin/carddisp.pl?gene=CD47">https://www.genecards.org/cgi-bin/carddisp.pl?gene=CD47</a>                 |
| SCUBE2       | Signal Peptide, CUB Domain And EGF Like Domain Containing 2 | Protein Coding    | 40 | GC11M009019 | 1.62303  | <a href="https://www.genecards.org/cgi-bin/carddisp.pl?gene=SCUBE2">https://www.genecards.org/cgi-bin/carddisp.pl?gene=SCUBE2</a>             |
| EGLN1        | Egl-9 Family Hypoxia Inducible Factor 1                     | Protein Coding    | 48 | GC01M231363 | 1.622046 | <a href="https://www.genecards.org/cgi-bin/carddisp.pl?gene=EGLN1">https://www.genecards.org/cgi-bin/carddisp.pl?gene=EGLN1</a>               |
| CPQ          | Carboxypeptidase Q                                          | Protein Coding    | 36 | GC08P096645 | 1.622046 | <a href="https://www.genecards.org/cgi-bin/carddisp.pl?gene=CPQ">https://www.genecards.org/cgi-bin/carddisp.pl?gene=CPQ</a>                   |

|           |                                                        |                |    |             |          |                                                                                                                                       |
|-----------|--------------------------------------------------------|----------------|----|-------------|----------|---------------------------------------------------------------------------------------------------------------------------------------|
|           |                                                        |                |    |             |          | <a href="#">bin/carddisp.pl?gene=CPQ</a>                                                                                              |
| TRIM3     | Tripartite Motif Containing 3                          | Protein Coding | 35 | GC11M006459 | 1.622046 | <a href="https://www.genecards.org/cgi-bin/carddisp.pl?gene=TRIM3">https://www.genecards.org/cgi-bin/carddisp.pl?gene=TRIM3</a>       |
| NAA25     | N-Alpha-Acetyltransferase 25, NatB Auxiliary Subunit   | Protein Coding | 34 | GC12M112026 | 1.620996 | <a href="https://www.genecards.org/cgi-bin/carddisp.pl?gene=NAA25">https://www.genecards.org/cgi-bin/carddisp.pl?gene=NAA25</a>       |
| TAB3      | TGF-Beta Activated Kinase 1 (MAP3K7) Binding Protein 3 | Protein Coding | 39 | GC0XM030901 | 1.620379 | <a href="https://www.genecards.org/cgi-bin/carddisp.pl?gene=TAB3">https://www.genecards.org/cgi-bin/carddisp.pl?gene=TAB3</a>         |
| LORICRI N | Loricrin Cornified Envelope Precursor Protein          | Protein Coding | 27 | GC01P153262 | 1.61466  | <a href="https://www.genecards.org/cgi-bin/carddisp.pl?gene=LORICRIN">https://www.genecards.org/cgi-bin/carddisp.pl?gene=LORICRIN</a> |
| PGLYRP 2  | Peptidoglycan Recognition Protein 2                    | Protein Coding | 38 | GC19M015468 | 1.608178 | <a href="https://www.genecards.org/cgi-bin/carddisp.pl?gene=PGLYRP2">https://www.genecards.org/cgi-bin/carddisp.pl?gene=PGLYRP2</a>   |
| SCG2      | Secretogranin II                                       | Protein Coding | 39 | GC02M223596 | 1.607782 | <a href="https://www.genecards.org/cgi-bin/carddisp.pl?gene=SCG2">https://www.genecards.org/cgi-bin/carddisp.pl?gene=SCG2</a>         |
| STK4      | Serine/Threonine Kinase 4                              | Protein Coding | 48 | GC20P044966 | 1.606022 | <a href="https://www.genecards.org/cgi-bin/carddisp.pl?gene=STK4">https://www.genecards.org/cgi-bin/carddisp.pl?gene=STK4</a>         |
| MIR19A    | MicroRNA 19a                                           | RNA Gene       | 20 | GC13P091554 | 1.604466 | <a href="https://www.genecards.org/cgi-bin/carddisp.pl?gene=MIR19A">https://www.genecards.org/cgi-bin/carddisp.pl?gene=MIR19A</a>     |
| RNPEPL 1  | Arginyl Aminopeptidase Like 1                          | Protein Coding | 35 | GC02P240565 | 1.604185 | <a href="https://www.genecards.org/cgi-bin/carddisp.pl?gene=RNPEPL1">https://www.genecards.org/cgi-bin/carddisp.pl?gene=RNPEPL1</a>   |
| ID3       | Inhibitor Of DNA Binding 3, HLH Protein                | Protein Coding | 40 | GC01M023557 | 1.60176  | <a href="https://www.genecards.org/cgi-bin/carddisp.pl?gene=ID3">https://www.genecards.org/cgi-bin/carddisp.pl?gene=ID3</a>           |
| DPYSL5    | Dihydropyrimidinase Like 5                             | Protein Coding | 39 | GC02P026847 | 1.601079 | <a href="https://www.genecards.org/cgi-bin/carddisp.pl?gene=DPYSL5">https://www.genecards.org/cgi-bin/carddisp.pl?gene=DPYSL5</a>     |
| ERCC6     | ERCC Excision Repair 6, Chromatin Remodeling Factor    | Protein Coding | 45 | GC10M049454 | 1.600263 | <a href="https://www.genecards.org/cgi-bin/carddisp.pl?gene=ERCC6">https://www.genecards.org/cgi-bin/carddisp.pl?gene=ERCC6</a>       |
| ITGA6     | Integrin Subunit Alpha 6                               | Protein Coding | 48 | GC02P172427 | 1.594318 | <a href="https://www.genecards.org/cgi-bin/carddisp.pl?gene=ITGA6">https://www.genecards.org/cgi-bin/carddisp.pl?gene=ITGA6</a>       |

|        |                                                                    |                |    |             |          |                                                                                                                                   |
|--------|--------------------------------------------------------------------|----------------|----|-------------|----------|-----------------------------------------------------------------------------------------------------------------------------------|
| COL4A1 | Collagen Type IV Alpha 1 Chain                                     | Protein Coding | 46 | GC13M110148 | 1.594318 | <a href="https://www.genecards.org/cgi-bin/carddisp.pl?gene=COL4A1">https://www.genecards.org/cgi-bin/carddisp.pl?gene=COL4A1</a> |
| DRD1   | Dopamine Receptor D1                                               | Protein Coding | 43 | GC05M175440 | 1.594318 | <a href="https://www.genecards.org/cgi-bin/carddisp.pl?gene=DRD1">https://www.genecards.org/cgi-bin/carddisp.pl?gene=DRD1</a>     |
| DRD3   | Dopamine Receptor D3                                               | Protein Coding | 43 | GC03M114128 | 1.594318 | <a href="https://www.genecards.org/cgi-bin/carddisp.pl?gene=DRD3">https://www.genecards.org/cgi-bin/carddisp.pl?gene=DRD3</a>     |
| PSMB1  | Proteasome 20S Subunit Beta 1                                      | Protein Coding | 43 | GC06M170535 | 1.594318 | <a href="https://www.genecards.org/cgi-bin/carddisp.pl?gene=PSMB1">https://www.genecards.org/cgi-bin/carddisp.pl?gene=PSMB1</a>   |
| FSCN1  | Fascin Actin-Bundling Protein 1                                    | Protein Coding | 42 | GC07P005592 | 1.594318 | <a href="https://www.genecards.org/cgi-bin/carddisp.pl?gene=FSCN1">https://www.genecards.org/cgi-bin/carddisp.pl?gene=FSCN1</a>   |
| ORAI1  | ORAI Calcium Release-Activated Calcium Modulator 1                 | Protein Coding | 42 | GC12P126225 | 1.594318 | <a href="https://www.genecards.org/cgi-bin/carddisp.pl?gene=ORAI1">https://www.genecards.org/cgi-bin/carddisp.pl?gene=ORAI1</a>   |
| MRC1   | Mannose Receptor C-Type 1                                          | Protein Coding | 40 | GC10P017809 | 1.594318 | <a href="https://www.genecards.org/cgi-bin/carddisp.pl?gene=MRC1">https://www.genecards.org/cgi-bin/carddisp.pl?gene=MRC1</a>     |
| MRE11  | MRE11 Homolog, Double Strand Break Repair Nuclease                 | Protein Coding | 39 | GC11M096553 | 1.594318 | <a href="https://www.genecards.org/cgi-bin/carddisp.pl?gene=MRE11">https://www.genecards.org/cgi-bin/carddisp.pl?gene=MRE11</a>   |
| LSM4   | LSM4 Homolog, U6 Small Nuclear RNA And MRNA Degradation Associated | Protein Coding | 38 | GC19M018306 | 1.594318 | <a href="https://www.genecards.org/cgi-bin/carddisp.pl?gene=LSM4">https://www.genecards.org/cgi-bin/carddisp.pl?gene=LSM4</a>     |
| NLRC5  | NLR Family CARD Domain Containing 5                                | Protein Coding | 38 | GC16P057035 | 1.594318 | <a href="https://www.genecards.org/cgi-bin/carddisp.pl?gene=NLRC5">https://www.genecards.org/cgi-bin/carddisp.pl?gene=NLRC5</a>   |
| AFF1   | AF4/FMR2 Family Member 1                                           | Protein Coding | 37 | GC04P086934 | 1.594318 | <a href="https://www.genecards.org/cgi-bin/carddisp.pl?gene=AFF1">https://www.genecards.org/cgi-bin/carddisp.pl?gene=AFF1</a>     |
| CIRBP  | Cold Inducible RNA Binding Protein                                 | Protein Coding | 37 | GC19P001259 | 1.594318 | <a href="https://www.genecards.org/cgi-bin/carddisp.pl?gene=CIRBP">https://www.genecards.org/cgi-bin/carddisp.pl?gene=CIRBP</a>   |
| IKZF2  | IKAROS Family Zinc Finger 2                                        | Protein Coding | 37 | GC02M213001 | 1.594318 | <a href="https://www.genecards.org/cgi-bin/carddisp.pl?gene=IKZF2">https://www.genecards.org/cgi-bin/carddisp.pl?gene=IKZF2</a>   |

|         |                                                |                |    |             |          |                                                                                                                                     |
|---------|------------------------------------------------|----------------|----|-------------|----------|-------------------------------------------------------------------------------------------------------------------------------------|
| MIR766  | MicroRNA 766                                   | RNA Gene       | 18 | GC0XM119646 | 1.594318 | <a href="https://www.genecards.org/cgi-bin/carddisp.pl?gene=MIR766">https://www.genecards.org/cgi-bin/carddisp.pl?gene=MIR766</a>   |
| MIR498  | MicroRNA 498                                   | RNA Gene       | 17 | GC19P067334 | 1.594318 | <a href="https://www.genecards.org/cgi-bin/carddisp.pl?gene=MIR498">https://www.genecards.org/cgi-bin/carddisp.pl?gene=MIR498</a>   |
| MIR6089 | MicroRNA 6089                                  | RNA Gene       | 8  | GC0XP002632 | 1.594318 | <a href="https://www.genecards.org/cgi-bin/carddisp.pl?gene=MIR6089">https://www.genecards.org/cgi-bin/carddisp.pl?gene=MIR6089</a> |
| DDC     | Dopa Decarboxylase                             | Protein Coding | 49 | GC07M050458 | 1.594307 | <a href="https://www.genecards.org/cgi-bin/carddisp.pl?gene=DDC">https://www.genecards.org/cgi-bin/carddisp.pl?gene=DDC</a>         |
| MARCO   | Macrophage Receptor With Collagenous Structure | Protein Coding | 40 | GC02P118942 | 1.589498 | <a href="https://www.genecards.org/cgi-bin/carddisp.pl?gene=MARCO">https://www.genecards.org/cgi-bin/carddisp.pl?gene=MARCO</a>     |
| SNX9    | Sorting Nexin 9                                | Protein Coding | 40 | GC06P157685 | 1.588394 | <a href="https://www.genecards.org/cgi-bin/carddisp.pl?gene=SNX9">https://www.genecards.org/cgi-bin/carddisp.pl?gene=SNX9</a>       |
| DSP     | Desmoplakin                                    | Protein Coding | 48 | GC06P007541 | 1.587361 | <a href="https://www.genecards.org/cgi-bin/carddisp.pl?gene=DSP">https://www.genecards.org/cgi-bin/carddisp.pl?gene=DSP</a>         |
| KLKB1   | Kallikrein B1                                  | Protein Coding | 46 | GC04P186208 | 1.58596  | <a href="https://www.genecards.org/cgi-bin/carddisp.pl?gene=KLKB1">https://www.genecards.org/cgi-bin/carddisp.pl?gene=KLKB1</a>     |
| BLVRB   | Biliverdin Reductase B                         | Protein Coding | 38 | GC19M040447 | 1.58596  | <a href="https://www.genecards.org/cgi-bin/carddisp.pl?gene=BLVRB">https://www.genecards.org/cgi-bin/carddisp.pl?gene=BLVRB</a>     |
| ZNF148  | Zinc Finger Protein 148                        | Protein Coding | 40 | GC03M125225 | 1.584283 | <a href="https://www.genecards.org/cgi-bin/carddisp.pl?gene=ZNF148">https://www.genecards.org/cgi-bin/carddisp.pl?gene=ZNF148</a>   |
| GADD45B | Growth Arrest And DNA Damage Inducible Beta    | Protein Coding | 36 | GC19P002476 | 1.584283 | <a href="https://www.genecards.org/cgi-bin/carddisp.pl?gene=GADD45B">https://www.genecards.org/cgi-bin/carddisp.pl?gene=GADD45B</a> |
| MIR147B | MicroRNA 147b                                  | RNA Gene       | 19 | GC15P045433 | 1.584283 | <a href="https://www.genecards.org/cgi-bin/carddisp.pl?gene=MIR147B">https://www.genecards.org/cgi-bin/carddisp.pl?gene=MIR147B</a> |
| ACVRL1  | Activin A Receptor Like Type 1                 | Protein Coding | 48 | GC12P051906 | 1.583642 | <a href="https://www.genecards.org/cgi-bin/carddisp.pl?gene=ACVRL1">https://www.genecards.org/cgi-bin/carddisp.pl?gene=ACVRL1</a>   |
| ELF3    | E74 Like ETS Transcription Factor 3            | Protein Coding | 39 | GC01P202007 | 1.582903 | <a href="https://www.genecards.org/cgi-">https://www.genecards.org/cgi-</a>                                                         |

|                 |                                               |                |    |             |          |                                                                                                                                                     |
|-----------------|-----------------------------------------------|----------------|----|-------------|----------|-----------------------------------------------------------------------------------------------------------------------------------------------------|
|                 |                                               |                |    |             |          | bin/carddisp.pl?gene=ELF3                                                                                                                           |
| PIM2            | Pim-2 Proto-Oncogene, Serine/Threonine Kinase | Protein Coding | 42 | GC0XM048913 | 1.582481 | <a href="https://www.genecards.org/cgi-bin/carddisp.pl?gene=PIM2">https://www.genecards.org/cgi-bin/carddisp.pl?gene=PIM2</a>                       |
| SNTB1           | Syntrophin Beta 1                             | Protein Coding | 37 | GC08M120535 | 1.582481 | <a href="https://www.genecards.org/cgi-bin/carddisp.pl?gene=SNTB1">https://www.genecards.org/cgi-bin/carddisp.pl?gene=SNTB1</a>                     |
| P2RX3           | Purinergic Receptor P2X 3                     | Protein Coding | 41 | GC11P057356 | 1.581138 | <a href="https://www.genecards.org/cgi-bin/carddisp.pl?gene=P2RX3">https://www.genecards.org/cgi-bin/carddisp.pl?gene=P2RX3</a>                     |
| MUC7            | Mucin 7, Secreted                             | Protein Coding | 36 | GC04P070430 | 1.579775 | <a href="https://www.genecards.org/cgi-bin/carddisp.pl?gene=MUC7">https://www.genecards.org/cgi-bin/carddisp.pl?gene=MUC7</a>                       |
| HSD17B8         | Hydroxysteroid 17-Beta Dehydrogenase 8        | Protein Coding | 39 | GC06P083755 | 1.575986 | <a href="https://www.genecards.org/cgi-bin/carddisp.pl?gene=HSD17B8">https://www.genecards.org/cgi-bin/carddisp.pl?gene=HSD17B8</a>                 |
| ATF6B           | Activating Transcription Factor 6 Beta        | Protein Coding | 37 | GC06M032115 | 1.575986 | <a href="https://www.genecards.org/cgi-bin/carddisp.pl?gene=ATF6B">https://www.genecards.org/cgi-bin/carddisp.pl?gene=ATF6B</a>                     |
| HCG23           | HLA Complex Group 23                          | RNA Gene       | 16 | GC06P083724 | 1.575986 | <a href="https://www.genecards.org/cgi-bin/carddisp.pl?gene=HCG23">https://www.genecards.org/cgi-bin/carddisp.pl?gene=HCG23</a>                     |
| ENSG00000250264 | Novel Protein, TAP2-HLA-DOB Readthrough       | Protein Coding | 9  | GC06M066022 | 1.575986 | <a href="https://www.genecards.org/cgi-bin/carddisp.pl?gene=ENSG00000250264">https://www.genecards.org/cgi-bin/carddisp.pl?gene=ENSG00000250264</a> |
| HSALNG0049451   |                                               | RNA Gene       | 4  | GC06P084618 | 1.575986 | <a href="https://www.genecards.org/cgi-bin/carddisp.pl?gene=HSALNG0049451">https://www.genecards.org/cgi-bin/carddisp.pl?gene=HSALNG0049451</a>     |
| lnc-PSMB9-14    |                                               | RNA Gene       | 4  | GC06P085131 | 1.575986 | <a href="https://www.genecards.org/cgi-bin/carddisp.pl?gene=lnc-PSMB9-14">https://www.genecards.org/cgi-bin/carddisp.pl?gene=lnc-PSMB9-14</a>       |
| CABIN1          | Calcineurin Binding Protein 1                 | Protein Coding | 41 | GC22P024011 | 1.574012 | <a href="https://www.genecards.org/cgi-bin/carddisp.pl?gene=CABIN1">https://www.genecards.org/cgi-bin/carddisp.pl?gene=CABIN1</a>                   |
| LAMC2           | Laminin Subunit Gamma 2                       | Protein Coding | 45 | GC01P183186 | 1.572692 | <a href="https://www.genecards.org/cgi-bin/carddisp.pl?gene=LAMC2">https://www.genecards.org/cgi-bin/carddisp.pl?gene=LAMC2</a>                     |
| COL4A2          | Collagen Type IV Alpha 2 Chain                | Protein Coding | 44 | GC13P110305 | 1.570701 | <a href="https://www.genecards.org/cgi-bin/carddisp.pl?gene=COL4A2">https://www.genecards.org/cgi-bin/carddisp.pl?gene=COL4A2</a>                   |

|           |                                                                |                |    |              |          |                                                                                                                                         |
|-----------|----------------------------------------------------------------|----------------|----|--------------|----------|-----------------------------------------------------------------------------------------------------------------------------------------|
| AGTR2     | Angiotensin II Receptor Type 2                                 | Protein Coding | 42 | GC0XP116170  | 1.570701 | <a href="https://www.genecards.org/cgi-bin/carddisp.pl?gene=AGTR2">https://www.genecards.org/cgi-bin/carddisp.pl?gene=AGTR2</a>         |
| CFD       | Complement Factor D                                            | Protein Coding | 43 | GC19P000859  | 1.569983 | <a href="https://www.genecards.org/cgi-bin/carddisp.pl?gene=CFD">https://www.genecards.org/cgi-bin/carddisp.pl?gene=CFD</a>             |
| ACKR3     | Atypical Chemokine Receptor 3                                  | Protein Coding | 40 | GC02P236537  | 1.567161 | <a href="https://www.genecards.org/cgi-bin/carddisp.pl?gene=ACKR3">https://www.genecards.org/cgi-bin/carddisp.pl?gene=ACKR3</a>         |
| PDIA3     | Protein Disulfide Isomerase Family A Member 3                  | Protein Coding | 42 | GC15P043746  | 1.565365 | <a href="https://www.genecards.org/cgi-bin/carddisp.pl?gene=PDIA3">https://www.genecards.org/cgi-bin/carddisp.pl?gene=PDIA3</a>         |
| RASGRP2   | RAS Guanyl Releasing Protein 2                                 | Protein Coding | 42 | GC11M064726  | 1.565365 | <a href="https://www.genecards.org/cgi-bin/carddisp.pl?gene=RASGRP2">https://www.genecards.org/cgi-bin/carddisp.pl?gene=RASGRP2</a>     |
| GOT1      | Glutamic-Oxaloacetic Transaminase 1                            | Protein Coding | 44 | GC10M099396  | 1.563368 | <a href="https://www.genecards.org/cgi-bin/carddisp.pl?gene=GOT1">https://www.genecards.org/cgi-bin/carddisp.pl?gene=GOT1</a>           |
| LINC01475 | Long Intergenic Non-Protein Coding RNA 1475                    | RNA Gene       | 12 | GC10M099526  | 1.563368 | <a href="https://www.genecards.org/cgi-bin/carddisp.pl?gene=LINC01475">https://www.genecards.org/cgi-bin/carddisp.pl?gene=LINC01475</a> |
| EEF1B2P6  | Eukaryotic Translation Elongation Factor 1 Beta 2 Pseudogene 6 | Pseudo gene    | 7  | GC07M131661  | 1.563368 | <a href="https://www.genecards.org/cgi-bin/carddisp.pl?gene=EEF1B2P6">https://www.genecards.org/cgi-bin/carddisp.pl?gene=EEF1B2P6</a>   |
| MT2A      | Metallothionein 2A                                             | Protein Coding | 41 | GC16P057038  | 1.5624   | <a href="https://www.genecards.org/cgi-bin/carddisp.pl?gene=MT2A">https://www.genecards.org/cgi-bin/carddisp.pl?gene=MT2A</a>           |
| CHI3L2    | Chitinase 3 Like 2                                             | Protein Coding | 37 | GC01P111201  | 1.561887 | <a href="https://www.genecards.org/cgi-bin/carddisp.pl?gene=CHI3L2">https://www.genecards.org/cgi-bin/carddisp.pl?gene=CHI3L2</a>       |
| PRDX2     | Peroxiredoxin 2                                                | Protein Coding | 44 | GC19M012796  | 1.561156 | <a href="https://www.genecards.org/cgi-bin/carddisp.pl?gene=PRDX2">https://www.genecards.org/cgi-bin/carddisp.pl?gene=PRDX2</a>         |
| MT-CYB    | Mitochondrially Encoded Cytochrome B                           | Protein Coding | 32 | GCMT P014749 | 1.56021  | <a href="https://www.genecards.org/cgi-bin/carddisp.pl?gene=MT-CYB">https://www.genecards.org/cgi-bin/carddisp.pl?gene=MT-CYB</a>       |
| MIR20A    | MicroRNA 20a                                                   | RNA Gene       | 20 | GC13P091555  | 1.558542 | <a href="https://www.genecards.org/cgi-bin/carddisp.pl?gene=MIR20A">https://www.genecards.org/cgi-bin/carddisp.pl?gene=MIR20A</a>       |
| CCL25     | C-C Motif Chemokine Ligand 25                                  | Protein Coding | 36 | GC19P008052  | 1.558183 | <a href="https://www.genecards.org/cgi-">https://www.genecards.org/cgi-</a>                                                             |

|          |                                           |                |    |             |          |                                                                                                                                       |
|----------|-------------------------------------------|----------------|----|-------------|----------|---------------------------------------------------------------------------------------------------------------------------------------|
|          |                                           |                |    |             |          | <a href="#">bin/carddisp.pl?gene=CCL25</a>                                                                                            |
| CENPA    | Centromere Protein A                      | Protein Coding | 38 | GC02P026765 | 1.556901 | <a href="https://www.genecards.org/cgi-bin/carddisp.pl?gene=CENPA">https://www.genecards.org/cgi-bin/carddisp.pl?gene=CENPA</a>       |
| EGR2     | Early Growth Response 2                   | Protein Coding | 42 | GC10M062811 | 1.553344 | <a href="https://www.genecards.org/cgi-bin/carddisp.pl?gene=EGR2">https://www.genecards.org/cgi-bin/carddisp.pl?gene=EGR2</a>         |
| SUCNR1   | Succinate Receptor 1                      | Protein Coding | 38 | GC03P151873 | 1.548542 | <a href="https://www.genecards.org/cgi-bin/carddisp.pl?gene=SUCNR1">https://www.genecards.org/cgi-bin/carddisp.pl?gene=SUCNR1</a>     |
| INAVA    | Innate Immunity Activator                 | Protein Coding | 27 | GC01P200892 | 1.546315 | <a href="https://www.genecards.org/cgi-bin/carddisp.pl?gene=INAVA">https://www.genecards.org/cgi-bin/carddisp.pl?gene=INAVA</a>       |
| IKZF1    | IKAROS Family Zinc Finger 1               | Protein Coding | 46 | GC07P050303 | 1.543654 | <a href="https://www.genecards.org/cgi-bin/carddisp.pl?gene=IKZF1">https://www.genecards.org/cgi-bin/carddisp.pl?gene=IKZF1</a>       |
| HDAC6    | Histone Deacetylase 6                     | Protein Coding | 50 | GC0XP048801 | 1.541989 | <a href="https://www.genecards.org/cgi-bin/carddisp.pl?gene=HDAC6">https://www.genecards.org/cgi-bin/carddisp.pl?gene=HDAC6</a>       |
| IL25     | Interleukin 25                            | Protein Coding | 36 | GC14P032705 | 1.541989 | <a href="https://www.genecards.org/cgi-bin/carddisp.pl?gene=IL25">https://www.genecards.org/cgi-bin/carddisp.pl?gene=IL25</a>         |
| DERL3    | Derlin 3                                  | Protein Coding | 34 | GC22M023834 | 1.541989 | <a href="https://www.genecards.org/cgi-bin/carddisp.pl?gene=DERL3">https://www.genecards.org/cgi-bin/carddisp.pl?gene=DERL3</a>       |
| MIR106B  | MicroRNA 106b                             | RNA Gene       | 22 | GC07M101892 | 1.541989 | <a href="https://www.genecards.org/cgi-bin/carddisp.pl?gene=MIR106B">https://www.genecards.org/cgi-bin/carddisp.pl?gene=MIR106B</a>   |
| NPPC     | Natriuretic Peptide C                     | Protein Coding | 41 | GC02M231921 | 1.540562 | <a href="https://www.genecards.org/cgi-bin/carddisp.pl?gene=NPPC">https://www.genecards.org/cgi-bin/carddisp.pl?gene=NPPC</a>         |
| LILRA2   | Leukocyte Immunoglobulin Like Receptor A2 | Protein Coding | 40 | GC19P054572 | 1.540562 | <a href="https://www.genecards.org/cgi-bin/carddisp.pl?gene=LILRA2">https://www.genecards.org/cgi-bin/carddisp.pl?gene=LILRA2</a>     |
| OIP5     | Opa Interacting Protein 5                 | Protein Coding | 34 | GC15M041309 | 1.540562 | <a href="https://www.genecards.org/cgi-bin/carddisp.pl?gene=OIP5">https://www.genecards.org/cgi-bin/carddisp.pl?gene=OIP5</a>         |
| MIR138-2 | MicroRNA 138-2                            | RNA Gene       | 21 | GC16P057067 | 1.540562 | <a href="https://www.genecards.org/cgi-bin/carddisp.pl?gene=MIR138-2">https://www.genecards.org/cgi-bin/carddisp.pl?gene=MIR138-2</a> |

|        |                                                              |                |    |             |          |                                                                                                                                   |
|--------|--------------------------------------------------------------|----------------|----|-------------|----------|-----------------------------------------------------------------------------------------------------------------------------------|
| MIR448 | MicroRNA 448                                                 | RNA Gene       | 13 | GC0XP114823 | 1.540562 | <a href="https://www.genecards.org/cgi-bin/carddisp.pl?gene=MIR448">https://www.genecards.org/cgi-bin/carddisp.pl?gene=MIR448</a> |
| KISS1R | KISS1 Receptor                                               | Protein Coding | 44 | GC19P000917 | 1.533888 | <a href="https://www.genecards.org/cgi-bin/carddisp.pl?gene=KISS1R">https://www.genecards.org/cgi-bin/carddisp.pl?gene=KISS1R</a> |
| CRAT   | Carnitine O-Acetyltransferase                                | Protein Coding | 44 | GC09M129094 | 1.531042 | <a href="https://www.genecards.org/cgi-bin/carddisp.pl?gene=CRAT">https://www.genecards.org/cgi-bin/carddisp.pl?gene=CRAT</a>     |
| MFNG   | MFNG O-Fucosylpeptide 3-Beta-N-Acetylglucosaminyltransferase | Protein Coding | 39 | GC22M037469 | 1.530903 | <a href="https://www.genecards.org/cgi-bin/carddisp.pl?gene=MFNG">https://www.genecards.org/cgi-bin/carddisp.pl?gene=MFNG</a>     |
| CHID1  | Chitinase Domain Containing 1                                | Protein Coding | 36 | GC11M000867 | 1.527948 | <a href="https://www.genecards.org/cgi-bin/carddisp.pl?gene=CHID1">https://www.genecards.org/cgi-bin/carddisp.pl?gene=CHID1</a>   |
| GSDME  | Gasdermin E                                                  | Protein Coding | 31 | GC07M024699 | 1.527948 | <a href="https://www.genecards.org/cgi-bin/carddisp.pl?gene=GSDME">https://www.genecards.org/cgi-bin/carddisp.pl?gene=GSDME</a>   |
| MC1R   | Melanocortin 1 Receptor                                      | Protein Coding | 45 | GC16P089912 | 1.524795 | <a href="https://www.genecards.org/cgi-bin/carddisp.pl?gene=MC1R">https://www.genecards.org/cgi-bin/carddisp.pl?gene=MC1R</a>     |
| TARS1  | Threonyl-TRNA Synthetase 1                                   | Protein Coding | 36 | GC05P033441 | 1.522445 | <a href="https://www.genecards.org/cgi-bin/carddisp.pl?gene=TARS1">https://www.genecards.org/cgi-bin/carddisp.pl?gene=TARS1</a>   |
| PSMB7  | Proteasome 20S Subunit Beta 7                                | Protein Coding | 44 | GC09M124353 | 1.520765 | <a href="https://www.genecards.org/cgi-bin/carddisp.pl?gene=PSMB7">https://www.genecards.org/cgi-bin/carddisp.pl?gene=PSMB7</a>   |
| HMMR   | Hyaluronan Mediated Motility Receptor                        | Protein Coding | 41 | GC05P163480 | 1.520765 | <a href="https://www.genecards.org/cgi-bin/carddisp.pl?gene=HMMR">https://www.genecards.org/cgi-bin/carddisp.pl?gene=HMMR</a>     |
| GNLY   | Granulysin                                                   | Protein Coding | 37 | GC02P085685 | 1.520765 | <a href="https://www.genecards.org/cgi-bin/carddisp.pl?gene=GNLY">https://www.genecards.org/cgi-bin/carddisp.pl?gene=GNLY</a>     |
| ALCAM  | Activated Leukocyte Cell Adhesion Molecule                   | Protein Coding | 42 | GC03P105366 | 1.517186 | <a href="https://www.genecards.org/cgi-bin/carddisp.pl?gene=ALCAM">https://www.genecards.org/cgi-bin/carddisp.pl?gene=ALCAM</a>   |
| A1BG   | Alpha-1-B Glycoprotein                                       | Protein Coding | 37 | GC19M058345 | 1.517186 | <a href="https://www.genecards.org/cgi-bin/carddisp.pl?gene=A1BG">https://www.genecards.org/cgi-bin/carddisp.pl?gene=A1BG</a>     |
| DDIT3  | DNA Damage Inducible Transcript 3                            | Protein Coding | 44 | GC12M057516 | 1.516357 | <a href="https://www.genecards.org/cgi-">https://www.genecards.org/cgi-</a>                                                       |



|        |                                                  |                |    |             |          |                                                                                                                                          |
|--------|--------------------------------------------------|----------------|----|-------------|----------|------------------------------------------------------------------------------------------------------------------------------------------|
|        |                                                  |                |    |             |          | <a href="http://www.ncbi.nlm.nih.gov/ncbi/cdd/bin/carddisp.pl?gene=DDIT3">bin/carddisp.pl?gene=DDIT3</a>                                 |
| HYAL2  | Hyaluronidase 2                                  | Protein Coding | 43 | GC03M050317 | 1.516357 | <a href="http://www.ncbi.nlm.nih.gov/ncbi/cdd/bin/carddisp.pl?gene=HYAL2">https://www.genecards.org/cgi-bin/carddisp.pl?gene=HYAL2</a>   |
| CHAD   | Chondroadherin                                   | Protein Coding | 37 | GC17M050464 | 1.516357 | <a href="http://www.ncbi.nlm.nih.gov/ncbi/cdd/bin/carddisp.pl?gene=CHAD">https://www.genecards.org/cgi-bin/carddisp.pl?gene=CHAD</a>     |
| IGH    | Immunoglobulin Heavy Locus                       | Protein Coding | 18 | GC14M112706 | 1.509174 | <a href="http://www.ncbi.nlm.nih.gov/ncbi/cdd/bin/carddisp.pl?gene=IGH">https://www.genecards.org/cgi-bin/carddisp.pl?gene=IGH</a>       |
| ELMOD2 | ELMO Domain Containing 2                         | Protein Coding | 35 | GC04P140524 | 1.508702 | <a href="http://www.ncbi.nlm.nih.gov/ncbi/cdd/bin/carddisp.pl?gene=ELMOD2">https://www.genecards.org/cgi-bin/carddisp.pl?gene=ELMOD2</a> |
| SPPL2C | Signal Peptide Peptidase Like 2C                 | Protein Coding | 32 | GC17P045844 | 1.508702 | <a href="http://www.ncbi.nlm.nih.gov/ncbi/cdd/bin/carddisp.pl?gene=SPPL2C">https://www.genecards.org/cgi-bin/carddisp.pl?gene=SPPL2C</a> |
| SAG    | S-Antigen Visual Arrestin                        | Protein Coding | 44 | GC02P233393 | 1.504816 | <a href="http://www.ncbi.nlm.nih.gov/ncbi/cdd/bin/carddisp.pl?gene=SAG">https://www.genecards.org/cgi-bin/carddisp.pl?gene=SAG</a>       |
| CTH    | Cystathionine Gamma-Lyase                        | Protein Coding | 48 | GC01P070411 | 1.504572 | <a href="http://www.ncbi.nlm.nih.gov/ncbi/cdd/bin/carddisp.pl?gene=CTH">https://www.genecards.org/cgi-bin/carddisp.pl?gene=CTH</a>       |
| SLAMF8 | SLAM Family Member 8                             | Protein Coding | 34 | GC01P159826 | 1.504572 | <a href="http://www.ncbi.nlm.nih.gov/ncbi/cdd/bin/carddisp.pl?gene=SLAMF8">https://www.genecards.org/cgi-bin/carddisp.pl?gene=SLAMF8</a> |
| SLC6A3 | Solute Carrier Family 6 Member 3                 | Protein Coding | 48 | GC05M001392 | 1.497591 | <a href="http://www.ncbi.nlm.nih.gov/ncbi/cdd/bin/carddisp.pl?gene=SLC6A3">https://www.genecards.org/cgi-bin/carddisp.pl?gene=SLC6A3</a> |
| MAP4K3 | Mitogen-Activated Protein Kinase Kinase Kinase 3 | Protein Coding | 40 | GC02M039249 | 1.496403 | <a href="http://www.ncbi.nlm.nih.gov/ncbi/cdd/bin/carddisp.pl?gene=MAP4K3">https://www.genecards.org/cgi-bin/carddisp.pl?gene=MAP4K3</a> |
| TRIM38 | Tripartite Motif Containing 38                   | Protein Coding | 38 | GC06P025962 | 1.492981 | <a href="http://www.ncbi.nlm.nih.gov/ncbi/cdd/bin/carddisp.pl?gene=TRIM38">https://www.genecards.org/cgi-bin/carddisp.pl?gene=TRIM38</a> |
| MIR425 | MicroRNA 425                                     | RNA Gene       | 20 | GC03M051161 | 1.492981 | <a href="http://www.ncbi.nlm.nih.gov/ncbi/cdd/bin/carddisp.pl?gene=MIR425">https://www.genecards.org/cgi-bin/carddisp.pl?gene=MIR425</a> |
| MIR361 | MicroRNA 361                                     | RNA Gene       | 17 | GC0XM085903 | 1.492981 | <a href="http://www.ncbi.nlm.nih.gov/ncbi/cdd/bin/carddisp.pl?gene=MIR361">https://www.genecards.org/cgi-bin/carddisp.pl?gene=MIR361</a> |

|           |                                                      |                |    |             |          |                                                                                                                                         |
|-----------|------------------------------------------------------|----------------|----|-------------|----------|-----------------------------------------------------------------------------------------------------------------------------------------|
| DLG5      | Discs Large MAGUK Scaffold Protein 5                 | Protein Coding | 38 | GC10M077790 | 1.492894 | <a href="https://www.genecards.org/cgi-bin/carddisp.pl?gene=DLG5">https://www.genecards.org/cgi-bin/carddisp.pl?gene=DLG5</a>           |
| LNPEP     | Leucyl And Cystinyl Aminopeptidase                   | Protein Coding | 45 | GC05P096935 | 1.492114 | <a href="https://www.genecards.org/cgi-bin/carddisp.pl?gene=LNPEP">https://www.genecards.org/cgi-bin/carddisp.pl?gene=LNPEP</a>         |
| ATP8B2    | ATPase Phospholipid Transporting 8B2                 | Protein Coding | 38 | GC01P154325 | 1.492114 | <a href="https://www.genecards.org/cgi-bin/carddisp.pl?gene=ATP8B2">https://www.genecards.org/cgi-bin/carddisp.pl?gene=ATP8B2</a>       |
| CLIC4     | Chloride Intracellular Channel 4                     | Protein Coding | 38 | GC01P024745 | 1.492114 | <a href="https://www.genecards.org/cgi-bin/carddisp.pl?gene=CLIC4">https://www.genecards.org/cgi-bin/carddisp.pl?gene=CLIC4</a>         |
| LINC02341 | Long Intergenic Non-Protein Coding RNA 2341          | RNA Gene       | 10 | GC13P042339 | 1.492114 | <a href="https://www.genecards.org/cgi-bin/carddisp.pl?gene=LINC02341">https://www.genecards.org/cgi-bin/carddisp.pl?gene=LINC02341</a> |
| NOS1      | Nitric Oxide Synthase 1                              | Protein Coding | 48 | GC12M117208 | 1.491924 | <a href="https://www.genecards.org/cgi-bin/carddisp.pl?gene=NOS1">https://www.genecards.org/cgi-bin/carddisp.pl?gene=NOS1</a>           |
| ODC1      | Ornithine Decarboxylase 1                            | Protein Coding | 46 | GC02M010432 | 1.489458 | <a href="https://www.genecards.org/cgi-bin/carddisp.pl?gene=ODC1">https://www.genecards.org/cgi-bin/carddisp.pl?gene=ODC1</a>           |
| ADAMTSL2  | ADAMTS Like 2                                        | Protein Coding | 41 | GC09P134257 | 1.482744 | <a href="https://www.genecards.org/cgi-bin/carddisp.pl?gene=ADAMTSL2">https://www.genecards.org/cgi-bin/carddisp.pl?gene=ADAMTSL2</a>   |
| RPL3P2    | Ribosomal Protein L3 Pseudogene 2                    | Pseudo gene    | 10 | GC06P031280 | 1.481575 | <a href="https://www.genecards.org/cgi-bin/carddisp.pl?gene=RPL3P2">https://www.genecards.org/cgi-bin/carddisp.pl?gene=RPL3P2</a>       |
| MAP1LC3A  | Microtubule Associated Protein 1 Light Chain 3 Alpha | Protein Coding | 40 | GC20P034546 | 1.480463 | <a href="https://www.genecards.org/cgi-bin/carddisp.pl?gene=MAP1LC3A">https://www.genecards.org/cgi-bin/carddisp.pl?gene=MAP1LC3A</a>   |
| TRIM2     | Tripartite Motif Containing 2                        | Protein Coding | 40 | GC04P153152 | 1.480463 | <a href="https://www.genecards.org/cgi-bin/carddisp.pl?gene=TRIM2">https://www.genecards.org/cgi-bin/carddisp.pl?gene=TRIM2</a>         |
| BAIAP2L1  | BAR/IMD Domain Containing Adaptor Protein 2 Like 1   | Protein Coding | 38 | GC07M098294 | 1.480463 | <a href="https://www.genecards.org/cgi-bin/carddisp.pl?gene=BAIAP2L1">https://www.genecards.org/cgi-bin/carddisp.pl?gene=BAIAP2L1</a>   |
| MAL       | Mal, T Cell Differentiation Protein                  | Protein Coding | 36 | GC02P095025 | 1.480463 | <a href="https://www.genecards.org/cgi-bin/carddisp.pl?gene=MAL">https://www.genecards.org/cgi-bin/carddisp.pl?gene=MAL</a>             |
| YWHAQ     | Tyrosine 3-Monooxygenase/Tryptoph                    | Protein Coding | 44 | GC02M009583 | 1.478126 | <a href="https://www.genecards.org/cgi-">https://www.genecards.org/cgi-</a>                                                             |

|        |                                               |                |    |             |          |                                                                                                                                          |
|--------|-----------------------------------------------|----------------|----|-------------|----------|------------------------------------------------------------------------------------------------------------------------------------------|
|        | an 5-Monooxygenase Activation Protein Theta   |                |    |             |          | <a href="http://www.ncbi.nlm.nih.gov/ncbi/cdd/bin/carddisp.pl?gene=YWHAQ">bin/carddisp.pl?gene=YWHAQ</a>                                 |
| NR1D1  | Nuclear Receptor Subfamily 1 Group D Member 1 | Protein Coding | 46 | GC17M040092 | 1.476844 | <a href="http://www.ncbi.nlm.nih.gov/ncbi/cdd/bin/carddisp.pl?gene=NR1D1">https://www.genecards.org/cgi-bin/carddisp.pl?gene=NR1D1</a>   |
| CPA6   | Carboxypeptidase A6                           | Protein Coding | 43 | GC08M067422 | 1.476844 | <a href="http://www.ncbi.nlm.nih.gov/ncbi/cdd/bin/carddisp.pl?gene=CPA6">https://www.genecards.org/cgi-bin/carddisp.pl?gene=CPA6</a>     |
| GDF2   | Growth Differentiation Factor 2               | Protein Coding | 42 | GC10P047322 | 1.476844 | <a href="http://www.ncbi.nlm.nih.gov/ncbi/cdd/bin/carddisp.pl?gene=GDF2">https://www.genecards.org/cgi-bin/carddisp.pl?gene=GDF2</a>     |
| OPRD1  | Opioid Receptor Delta 1                       | Protein Coding | 42 | GC01P028812 | 1.476844 | <a href="http://www.ncbi.nlm.nih.gov/ncbi/cdd/bin/carddisp.pl?gene=OPRD1">https://www.genecards.org/cgi-bin/carddisp.pl?gene=OPRD1</a>   |
| CEBPD  | CCAAT Enhancer Binding Protein Delta          | Protein Coding | 38 | GC08M047759 | 1.476844 | <a href="http://www.ncbi.nlm.nih.gov/ncbi/cdd/bin/carddisp.pl?gene=CEBPD">https://www.genecards.org/cgi-bin/carddisp.pl?gene=CEBPD</a>   |
| MIR7-1 | MicroRNA 7-1                                  | RNA Gene       | 18 | GC09M093952 | 1.476844 | <a href="http://www.ncbi.nlm.nih.gov/ncbi/cdd/bin/carddisp.pl?gene=MIR7-1">https://www.genecards.org/cgi-bin/carddisp.pl?gene=MIR7-1</a> |
| MIR7-3 | MicroRNA 7-3                                  | RNA Gene       | 18 | GC19P004770 | 1.476844 | <a href="http://www.ncbi.nlm.nih.gov/ncbi/cdd/bin/carddisp.pl?gene=MIR7-3">https://www.genecards.org/cgi-bin/carddisp.pl?gene=MIR7-3</a> |
| MIR7-2 | MicroRNA 7-2                                  | RNA Gene       | 17 | GC15P088611 | 1.476844 | <a href="http://www.ncbi.nlm.nih.gov/ncbi/cdd/bin/carddisp.pl?gene=MIR7-2">https://www.genecards.org/cgi-bin/carddisp.pl?gene=MIR7-2</a> |
| SCG5   | Secretogranin V                               | Protein Coding | 37 | GC15P032641 | 1.474648 | <a href="http://www.ncbi.nlm.nih.gov/ncbi/cdd/bin/carddisp.pl?gene=SCG5">https://www.genecards.org/cgi-bin/carddisp.pl?gene=SCG5</a>     |
| PYY    | Peptide YY                                    | Protein Coding | 42 | GC17M043952 | 1.468681 | <a href="http://www.ncbi.nlm.nih.gov/ncbi/cdd/bin/carddisp.pl?gene=PYY">https://www.genecards.org/cgi-bin/carddisp.pl?gene=PYY</a>       |
| ADGRE2 | Adhesion G Protein-Coupled Receptor E2        | Protein Coding | 39 | GC19M014733 | 1.46716  | <a href="http://www.ncbi.nlm.nih.gov/ncbi/cdd/bin/carddisp.pl?gene=ADGRE2">https://www.genecards.org/cgi-bin/carddisp.pl?gene=ADGRE2</a> |
| LRP4   | LDL Receptor Related Protein 4                | Protein Coding | 43 | GC11M089351 | 1.466792 | <a href="http://www.ncbi.nlm.nih.gov/ncbi/cdd/bin/carddisp.pl?gene=LRP4">https://www.genecards.org/cgi-bin/carddisp.pl?gene=LRP4</a>     |
| CD1C   | CD1c Molecule                                 | Protein Coding | 38 | GC01P158289 | 1.466792 | <a href="http://www.ncbi.nlm.nih.gov/ncbi/cdd/bin/carddisp.pl?gene=CD1C">https://www.genecards.org/cgi-bin/carddisp.pl?gene=CD1C</a>     |

|         |                                                                          |                |    |             |          |                                                                                                                                     |
|---------|--------------------------------------------------------------------------|----------------|----|-------------|----------|-------------------------------------------------------------------------------------------------------------------------------------|
| CD1E    | CD1e Molecule                                                            | Protein Coding | 38 | GC01P158354 | 1.466792 | <a href="https://www.genecards.org/cgi-bin/carddisp.pl?gene=CD1E">https://www.genecards.org/cgi-bin/carddisp.pl?gene=CD1E</a>       |
| CD1B    | CD1b Molecule                                                            | Protein Coding | 37 | GC01M158297 | 1.466792 | <a href="https://www.genecards.org/cgi-bin/carddisp.pl?gene=CD1B">https://www.genecards.org/cgi-bin/carddisp.pl?gene=CD1B</a>       |
| PSMB11  | Proteasome Subunit Beta 11                                               | Protein Coding | 32 | GC14P033245 | 1.466792 | <a href="https://www.genecards.org/cgi-bin/carddisp.pl?gene=PSMB11">https://www.genecards.org/cgi-bin/carddisp.pl?gene=PSMB11</a>   |
| LDHB    | Lactate Dehydrogenase B                                                  | Protein Coding | 45 | GC12M021635 | 1.465253 | <a href="https://www.genecards.org/cgi-bin/carddisp.pl?gene=LDHB">https://www.genecards.org/cgi-bin/carddisp.pl?gene=LDHB</a>       |
| LOXL2   | Lysyl Oxidase Like 2                                                     | Protein Coding | 45 | GC08M023296 | 1.465253 | <a href="https://www.genecards.org/cgi-bin/carddisp.pl?gene=LOXL2">https://www.genecards.org/cgi-bin/carddisp.pl?gene=LOXL2</a>     |
| GDF11   | Growth Differentiation Factor 11                                         | Protein Coding | 41 | GC12P055743 | 1.465253 | <a href="https://www.genecards.org/cgi-bin/carddisp.pl?gene=GDF11">https://www.genecards.org/cgi-bin/carddisp.pl?gene=GDF11</a>     |
| PIK3C2A | Phosphatidylinositol-4-Phosphate 3-Kinase Catalytic Subunit Type 2 Alpha | Protein Coding | 45 | GC11M017580 | 1.464933 | <a href="https://www.genecards.org/cgi-bin/carddisp.pl?gene=PIK3C2A">https://www.genecards.org/cgi-bin/carddisp.pl?gene=PIK3C2A</a> |
| OSMR    | Oncostatin M Receptor                                                    | Protein Coding | 44 | GC05P038845 | 1.46427  | <a href="https://www.genecards.org/cgi-bin/carddisp.pl?gene=OSMR">https://www.genecards.org/cgi-bin/carddisp.pl?gene=OSMR</a>       |
| CKLF    | Chemokine Like Factor                                                    | Protein Coding | 37 | GC16P066552 | 1.46427  | <a href="https://www.genecards.org/cgi-bin/carddisp.pl?gene=CKLF">https://www.genecards.org/cgi-bin/carddisp.pl?gene=CKLF</a>       |
| STAMPB  | STAM Binding Protein                                                     | Protein Coding | 43 | GC02P073828 | 1.463375 | <a href="https://www.genecards.org/cgi-bin/carddisp.pl?gene=STAMPB">https://www.genecards.org/cgi-bin/carddisp.pl?gene=STAMPB</a>   |
| H2BC21  | H2B Clustered Histone 21                                                 | Protein Coding | 30 | GC01M152029 | 1.460906 | <a href="https://www.genecards.org/cgi-bin/carddisp.pl?gene=H2BC21">https://www.genecards.org/cgi-bin/carddisp.pl?gene=H2BC21</a>   |
| RAPGEF3 | Rap Guanine Nucleotide Exchange Factor 3                                 | Protein Coding | 43 | GC12M047736 | 1.457924 | <a href="https://www.genecards.org/cgi-bin/carddisp.pl?gene=RAPGEF3">https://www.genecards.org/cgi-bin/carddisp.pl?gene=RAPGEF3</a> |
| LY6G5B  | Lymphocyte Antigen 6 Family Member G5B                                   | Protein Coding | 30 | GC06P083701 | 1.457831 | <a href="https://www.genecards.org/cgi-bin/carddisp.pl?gene=LY6G5B">https://www.genecards.org/cgi-bin/carddisp.pl?gene=LY6G5B</a>   |
| FMR1    | Fragile X Messenger Ribonucleoprotein 1                                  | Protein Coding | 42 | GC0XP147943 | 1.456519 | <a href="https://www.genecards.org/cgi-">https://www.genecards.org/cgi-</a>                                                         |

|         |                                                               |                |    |             |          |                                                                                                                                            |
|---------|---------------------------------------------------------------|----------------|----|-------------|----------|--------------------------------------------------------------------------------------------------------------------------------------------|
|         |                                                               |                |    |             |          | <a href="http://www.ncbi.nlm.nih.gov/ncbi/cdd/bin/carddisp.pl?gene=FMR1">bin/carddisp.pl?gene=FMR1</a>                                     |
| SIGLEC5 | Sialic Acid Binding Ig Like Lectin 5                          | Protein Coding | 38 | GC19M066230 | 1.453637 | <a href="http://www.ncbi.nlm.nih.gov/ncbi/cdd/bin/carddisp.pl?gene=SIGLEC5">https://www.genecards.org/cgi-bin/carddisp.pl?gene=SIGLEC5</a> |
| UROD    | Uroporphyrinogen Decarboxylase                                | Protein Coding | 44 | GC01P045353 | 1.450618 | <a href="http://www.ncbi.nlm.nih.gov/ncbi/cdd/bin/carddisp.pl?gene=UROD">https://www.genecards.org/cgi-bin/carddisp.pl?gene=UROD</a>       |
| SAA3P   | Serum Amyloid A3, Pseudogene                                  | Pseudo gene    | 16 | GC11M018112 | 1.450228 | <a href="http://www.ncbi.nlm.nih.gov/ncbi/cdd/bin/carddisp.pl?gene=SAA3P">https://www.genecards.org/cgi-bin/carddisp.pl?gene=SAA3P</a>     |
| QDPR    | Quinoid Dihydropteridine Reductase                            | Protein Coding | 45 | GC04M017460 | 1.443045 | <a href="http://www.ncbi.nlm.nih.gov/ncbi/cdd/bin/carddisp.pl?gene=QDPR">https://www.genecards.org/cgi-bin/carddisp.pl?gene=QDPR</a>       |
| VSTM1   | V-Set And Transmembrane Domain Containing 1                   | Protein Coding | 32 | GC19M054040 | 1.443045 | <a href="http://www.ncbi.nlm.nih.gov/ncbi/cdd/bin/carddisp.pl?gene=VSTM1">https://www.genecards.org/cgi-bin/carddisp.pl?gene=VSTM1</a>     |
| MOGS    | Mannosyl-Oligosaccharide Glucosidase                          | Protein Coding | 41 | GC02M074461 | 1.441766 | <a href="http://www.ncbi.nlm.nih.gov/ncbi/cdd/bin/carddisp.pl?gene=MOGS">https://www.genecards.org/cgi-bin/carddisp.pl?gene=MOGS</a>       |
| CDKN2B  | Cyclin Dependent Kinase Inhibitor 2B                          | Protein Coding | 45 | GC09M022002 | 1.441158 | <a href="http://www.ncbi.nlm.nih.gov/ncbi/cdd/bin/carddisp.pl?gene=CDKN2B">https://www.genecards.org/cgi-bin/carddisp.pl?gene=CDKN2B</a>   |
| OPRK1   | Opioid Receptor Kappa 1                                       | Protein Coding | 44 | GC08M053227 | 1.440708 | <a href="http://www.ncbi.nlm.nih.gov/ncbi/cdd/bin/carddisp.pl?gene=OPRK1">https://www.genecards.org/cgi-bin/carddisp.pl?gene=OPRK1</a>     |
| NCR2    | Natural Cytotoxicity Triggering Receptor 2                    | Protein Coding | 38 | GC06P083892 | 1.440708 | <a href="http://www.ncbi.nlm.nih.gov/ncbi/cdd/bin/carddisp.pl?gene=NCR2">https://www.genecards.org/cgi-bin/carddisp.pl?gene=NCR2</a>       |
| MMD     | Monocyte To Macrophage Differentiation Associated             | Protein Coding | 33 | GC17M055392 | 1.440708 | <a href="http://www.ncbi.nlm.nih.gov/ncbi/cdd/bin/carddisp.pl?gene=MMD">https://www.genecards.org/cgi-bin/carddisp.pl?gene=MMD</a>         |
| DUSP5   | Dual Specificity Phosphatase 5                                | Protein Coding | 40 | GC10P110497 | 1.436743 | <a href="http://www.ncbi.nlm.nih.gov/ncbi/cdd/bin/carddisp.pl?gene=DUSP5">https://www.genecards.org/cgi-bin/carddisp.pl?gene=DUSP5</a>     |
| DYRK1A  | Dual Specificity Tyrosine Phosphorylation Regulated Kinase 1A | Protein Coding | 49 | GC21P037365 | 1.436542 | <a href="http://www.ncbi.nlm.nih.gov/ncbi/cdd/bin/carddisp.pl?gene=DYRK1A">https://www.genecards.org/cgi-bin/carddisp.pl?gene=DYRK1A</a>   |
| PRKCA   | Protein Kinase C Alpha                                        | Protein Coding | 48 | GC17P066302 | 1.436542 | <a href="http://www.ncbi.nlm.nih.gov/ncbi/cdd/bin/carddisp.pl?gene=PRKCA">https://www.genecards.org/cgi-bin/carddisp.pl?gene=PRKCA</a>     |

|         |                                                                    |                |    |             |          |                                                                                                                                     |
|---------|--------------------------------------------------------------------|----------------|----|-------------|----------|-------------------------------------------------------------------------------------------------------------------------------------|
| RARB    | Retinoic Acid Receptor Beta                                        | Protein Coding | 48 | GC03P024689 | 1.436542 | <a href="https://www.genecards.org/cgi-bin/carddisp.pl?gene=RARB">https://www.genecards.org/cgi-bin/carddisp.pl?gene=RARB</a>       |
| EIF4G1  | Eukaryotic Translation Initiation Factor 4 Gamma 1                 | Protein Coding | 45 | GC03P184314 | 1.436542 | <a href="https://www.genecards.org/cgi-bin/carddisp.pl?gene=EIF4G1">https://www.genecards.org/cgi-bin/carddisp.pl?gene=EIF4G1</a>   |
| PKM     | Pyruvate Kinase M1/2                                               | Protein Coding | 44 | GC15M072199 | 1.436542 | <a href="https://www.genecards.org/cgi-bin/carddisp.pl?gene=PKM">https://www.genecards.org/cgi-bin/carddisp.pl?gene=PKM</a>         |
| USP5    | Ubiquitin Specific Peptidase 5                                     | Protein Coding | 44 | GC12P021073 | 1.436542 | <a href="https://www.genecards.org/cgi-bin/carddisp.pl?gene=USP5">https://www.genecards.org/cgi-bin/carddisp.pl?gene=USP5</a>       |
| KPNA2   | Karyopherin Subunit Alpha 2                                        | Protein Coding | 43 | GC17P068035 | 1.436542 | <a href="https://www.genecards.org/cgi-bin/carddisp.pl?gene=KPNA2">https://www.genecards.org/cgi-bin/carddisp.pl?gene=KPNA2</a>     |
| PRMT5   | Protein Arginine Methyltransferase 5                               | Protein Coding | 43 | GC14M022920 | 1.436542 | <a href="https://www.genecards.org/cgi-bin/carddisp.pl?gene=PRMT5">https://www.genecards.org/cgi-bin/carddisp.pl?gene=PRMT5</a>     |
| CNP     | 2',3'-Cyclic Nucleotide 3' Phosphodiesterase                       | Protein Coding | 42 | GC17P041966 | 1.436542 | <a href="https://www.genecards.org/cgi-bin/carddisp.pl?gene=CNP">https://www.genecards.org/cgi-bin/carddisp.pl?gene=CNP</a>         |
| TRIM32  | Tripartite Motif Containing 32                                     | Protein Coding | 42 | GC09P116687 | 1.436542 | <a href="https://www.genecards.org/cgi-bin/carddisp.pl?gene=TRIM32">https://www.genecards.org/cgi-bin/carddisp.pl?gene=TRIM32</a>   |
| CD63    | CD63 Molecule                                                      | Protein Coding | 41 | GC12M055725 | 1.436542 | <a href="https://www.genecards.org/cgi-bin/carddisp.pl?gene=CD63">https://www.genecards.org/cgi-bin/carddisp.pl?gene=CD63</a>       |
| GRK5    | G Protein-Coupled Receptor Kinase 5                                | Protein Coding | 41 | GC10P119207 | 1.436542 | <a href="https://www.genecards.org/cgi-bin/carddisp.pl?gene=GRK5">https://www.genecards.org/cgi-bin/carddisp.pl?gene=GRK5</a>       |
| KHDRBS1 | KH RNA Binding Domain Containing, Signal Transduction Associated 1 | Protein Coding | 41 | GC01P032013 | 1.436542 | <a href="https://www.genecards.org/cgi-bin/carddisp.pl?gene=KHDRBS1">https://www.genecards.org/cgi-bin/carddisp.pl?gene=KHDRBS1</a> |
| KLF10   | Kruppel Like Factor 10                                             | Protein Coding | 41 | GC08M102648 | 1.436542 | <a href="https://www.genecards.org/cgi-bin/carddisp.pl?gene=KLF10">https://www.genecards.org/cgi-bin/carddisp.pl?gene=KLF10</a>     |
| PCBP1   | Poly(RC) Binding Protein 1                                         | Protein Coding | 41 | GC02P070087 | 1.436542 | <a href="https://www.genecards.org/cgi-bin/carddisp.pl?gene=PCBP1">https://www.genecards.org/cgi-bin/carddisp.pl?gene=PCBP1</a>     |
| S100A6  | S100 Calcium Binding Protein A6                                    | Protein Coding | 41 | GC01M153559 | 1.436542 | <a href="https://www.genecards.org/cgi-">https://www.genecards.org/cgi-</a>                                                         |

|          |                                                  |                |    |             |          |                                                                                                                                       |
|----------|--------------------------------------------------|----------------|----|-------------|----------|---------------------------------------------------------------------------------------------------------------------------------------|
|          |                                                  |                |    |             |          | <a href="#">bin/carddisp.pl?gene=S100A6</a>                                                                                           |
| SPRY1    | Sprouty RTK Signaling Antagonist 1               | Protein Coding | 41 | GC04P123396 | 1.436542 | <a href="https://www.genecards.org/cgi-bin/carddisp.pl?gene=SPRY1">https://www.genecards.org/cgi-bin/carddisp.pl?gene=SPRY1</a>       |
| STAB1    | Stabilin 1                                       | Protein Coding | 41 | GC03P052495 | 1.436542 | <a href="https://www.genecards.org/cgi-bin/carddisp.pl?gene=STAB1">https://www.genecards.org/cgi-bin/carddisp.pl?gene=STAB1</a>       |
| WNT9A    | Wnt Family Member 9A                             | Protein Coding | 41 | GC01M227920 | 1.436542 | <a href="https://www.genecards.org/cgi-bin/carddisp.pl?gene=WNT9A">https://www.genecards.org/cgi-bin/carddisp.pl?gene=WNT9A</a>       |
| BCL3     | BCL3 Transcription Coactivator                   | Protein Coding | 40 | GC19P044747 | 1.436542 | <a href="https://www.genecards.org/cgi-bin/carddisp.pl?gene=BCL3">https://www.genecards.org/cgi-bin/carddisp.pl?gene=BCL3</a>         |
| CLCF1    | Cardiotrophin Like Cytokine Factor 1             | Protein Coding | 40 | GC11M067364 | 1.436542 | <a href="https://www.genecards.org/cgi-bin/carddisp.pl?gene=CLCF1">https://www.genecards.org/cgi-bin/carddisp.pl?gene=CLCF1</a>       |
| IRAK2    | Interleukin 1 Receptor Associated Kinase 2       | Protein Coding | 39 | GC03P012457 | 1.436542 | <a href="https://www.genecards.org/cgi-bin/carddisp.pl?gene=IRAK2">https://www.genecards.org/cgi-bin/carddisp.pl?gene=IRAK2</a>       |
| SERPINB1 | Serpin Family B Member 1                         | Protein Coding | 39 | GC06M002835 | 1.436542 | <a href="https://www.genecards.org/cgi-bin/carddisp.pl?gene=SERPINB1">https://www.genecards.org/cgi-bin/carddisp.pl?gene=SERPINB1</a> |
| CD53     | CD53 Molecule                                    | Protein Coding | 38 | GC01P110871 | 1.436542 | <a href="https://www.genecards.org/cgi-bin/carddisp.pl?gene=CD53">https://www.genecards.org/cgi-bin/carddisp.pl?gene=CD53</a>         |
| MAST3    | Microtubule Associated Serine/Threonine Kinase 3 | Protein Coding | 38 | GC19P066241 | 1.436542 | <a href="https://www.genecards.org/cgi-bin/carddisp.pl?gene=MAST3">https://www.genecards.org/cgi-bin/carddisp.pl?gene=MAST3</a>       |
| MT3      | Metallothionein 3                                | Protein Coding | 38 | GC16P056589 | 1.436542 | <a href="https://www.genecards.org/cgi-bin/carddisp.pl?gene=MT3">https://www.genecards.org/cgi-bin/carddisp.pl?gene=MT3</a>           |
| OXA1L    | OXA1L Mitochondrial Inner Membrane Protein       | Protein Coding | 38 | GC14P022766 | 1.436542 | <a href="https://www.genecards.org/cgi-bin/carddisp.pl?gene=OXA1L">https://www.genecards.org/cgi-bin/carddisp.pl?gene=OXA1L</a>       |
| PDLIM2   | PDZ And LIM Domain 2                             | Protein Coding | 37 | GC08P022578 | 1.436542 | <a href="https://www.genecards.org/cgi-bin/carddisp.pl?gene=PDLIM2">https://www.genecards.org/cgi-bin/carddisp.pl?gene=PDLIM2</a>     |
| SNAPIN   | SNAP Associated Protein                          | Protein Coding | 37 | GC01P153660 | 1.436542 | <a href="https://www.genecards.org/cgi-bin/carddisp.pl?gene=SNAPIN">https://www.genecards.org/cgi-bin/carddisp.pl?gene=SNAPIN</a>     |

|         |                                                 |                |    |             |          |                                                                                                                                     |
|---------|-------------------------------------------------|----------------|----|-------------|----------|-------------------------------------------------------------------------------------------------------------------------------------|
| ORM2    | Orosomucoid 2                                   | Protein Coding | 36 | GC09P114329 | 1.436542 | <a href="https://www.genecards.org/cgi-bin/carddisp.pl?gene=ORM2">https://www.genecards.org/cgi-bin/carddisp.pl?gene=ORM2</a>       |
| STXBP6  | Syntaxin Binding Protein 6                      | Protein Coding | 36 | GC14M024812 | 1.436542 | <a href="https://www.genecards.org/cgi-bin/carddisp.pl?gene=STXBP6">https://www.genecards.org/cgi-bin/carddisp.pl?gene=STXBP6</a>   |
| KLLN    | Killin, P53 Regulated DNA Replication Inhibitor | Protein Coding | 29 | GC10M087867 | 1.436542 | <a href="https://www.genecards.org/cgi-bin/carddisp.pl?gene=KLLN">https://www.genecards.org/cgi-bin/carddisp.pl?gene=KLLN</a>       |
| TUG1    | Taurine Up-Regulated 1                          | Protein Coding | 22 | GC22P030969 | 1.436542 | <a href="https://www.genecards.org/cgi-bin/carddisp.pl?gene=TUG1">https://www.genecards.org/cgi-bin/carddisp.pl?gene=TUG1</a>       |
| MIR92A1 | MicroRNA 92a-1                                  | RNA Gene       | 19 | GC13P091558 | 1.436542 | <a href="https://www.genecards.org/cgi-bin/carddisp.pl?gene=MIR92A1">https://www.genecards.org/cgi-bin/carddisp.pl?gene=MIR92A1</a> |
| MIR421  | MicroRNA 421                                    | RNA Gene       | 16 | GC0XM074218 | 1.436542 | <a href="https://www.genecards.org/cgi-bin/carddisp.pl?gene=MIR421">https://www.genecards.org/cgi-bin/carddisp.pl?gene=MIR421</a>   |
| MIR613  | MicroRNA 613                                    | RNA Gene       | 14 | GC12P021342 | 1.436542 | <a href="https://www.genecards.org/cgi-bin/carddisp.pl?gene=MIR613">https://www.genecards.org/cgi-bin/carddisp.pl?gene=MIR613</a>   |
| MIR4701 | MicroRNA 4701                                   | RNA Gene       | 12 | GC12M049616 | 1.436542 | <a href="https://www.genecards.org/cgi-bin/carddisp.pl?gene=MIR4701">https://www.genecards.org/cgi-bin/carddisp.pl?gene=MIR4701</a> |
| NR1I3   | Nuclear Receptor Subfamily 1 Group I Member 3   | Protein Coding | 44 | GC01M161229 | 1.431934 | <a href="https://www.genecards.org/cgi-bin/carddisp.pl?gene=NR1I3">https://www.genecards.org/cgi-bin/carddisp.pl?gene=NR1I3</a>     |
| TGFBI   | Transforming Growth Factor Beta Induced         | Protein Coding | 45 | GC05P136027 | 1.429118 | <a href="https://www.genecards.org/cgi-bin/carddisp.pl?gene=TGFBI">https://www.genecards.org/cgi-bin/carddisp.pl?gene=TGFBI</a>     |
| SAT1    | Spermidine/Spermine N1-Acetyltransferase 1      | Protein Coding | 42 | GC0XP023784 | 1.429118 | <a href="https://www.genecards.org/cgi-bin/carddisp.pl?gene=SAT1">https://www.genecards.org/cgi-bin/carddisp.pl?gene=SAT1</a>       |
| FSTL3   | Follistatin Like 3                              | Protein Coding | 39 | GC19P000676 | 1.429118 | <a href="https://www.genecards.org/cgi-bin/carddisp.pl?gene=FSTL3">https://www.genecards.org/cgi-bin/carddisp.pl?gene=FSTL3</a>     |
| IFNLR1  | Interferon Lambda Receptor 1                    | Protein Coding | 34 | GC01M025645 | 1.429118 | <a href="https://www.genecards.org/cgi-bin/carddisp.pl?gene=IFNLR1">https://www.genecards.org/cgi-bin/carddisp.pl?gene=IFNLR1</a>   |
| MIR331  | MicroRNA 331                                    | RNA Gene       | 20 | GC12P095308 | 1.429118 | <a href="https://www.genecards.org/cgi-bin/carddisp.pl?gene=MIR331">https://www.genecards.org/cgi-bin/carddisp.pl?gene=MIR331</a>   |



|               |                                                                |                |    |             |          |                                                                                                                                                |
|---------------|----------------------------------------------------------------|----------------|----|-------------|----------|------------------------------------------------------------------------------------------------------------------------------------------------|
|               |                                                                |                |    |             |          | <a href="http://www.ncbi.nlm.nih.gov/ncbi/cdd/bin/carddisp.pl?gene=MIR331">bin/carddisp.pl?gene=MIR331</a>                                     |
| FOXD2-AS1     | FOXD2 Adjacent Opposite Strand RNA 1                           | RNA Gene       | 16 | GC01M047432 | 1.429118 | <a href="http://www.genecards.org/cgi-bin/carddisp.pl?gene=FOXD2-AS1">https://www.genecards.org/cgi-bin/carddisp.pl?gene=FOXD2-AS1</a>         |
| NTRK3         | Neurotrophic Receptor Tyrosine Kinase 3                        | Protein Coding | 50 | GC15M087859 | 1.426852 | <a href="http://www.genecards.org/cgi-bin/carddisp.pl?gene=NTRK3">https://www.genecards.org/cgi-bin/carddisp.pl?gene=NTRK3</a>                 |
| NTF4          | Neurotrophin 4                                                 | Protein Coding | 42 | GC19M066077 | 1.426852 | <a href="http://www.genecards.org/cgi-bin/carddisp.pl?gene=NTF4">https://www.genecards.org/cgi-bin/carddisp.pl?gene=NTF4</a>                   |
| F11R          | F11 Receptor                                                   | Protein Coding | 41 | GC01M160995 | 1.426852 | <a href="http://www.genecards.org/cgi-bin/carddisp.pl?gene=F11R">https://www.genecards.org/cgi-bin/carddisp.pl?gene=F11R</a>                   |
| RMRP          | RNA Component Of Mitochondrial RNA Processing Endoribonuclease | RNA Gene       | 25 | GC09M035655 | 1.426852 | <a href="http://www.genecards.org/cgi-bin/carddisp.pl?gene=RMRP">https://www.genecards.org/cgi-bin/carddisp.pl?gene=RMRP</a>                   |
| PEX5          | Peroxisomal Biogenesis Factor 5                                | Protein Coding | 42 | GC12P021103 | 1.42668  | <a href="http://www.genecards.org/cgi-bin/carddisp.pl?gene=PEX5">https://www.genecards.org/cgi-bin/carddisp.pl?gene=PEX5</a>                   |
| GSDMC         | Gasdermin C                                                    | Protein Coding | 33 | GC08M129705 | 1.425374 | <a href="http://www.genecards.org/cgi-bin/carddisp.pl?gene=GSDMC">https://www.genecards.org/cgi-bin/carddisp.pl?gene=GSDMC</a>                 |
| APCS          | Amyloid P Component, Serum                                     | Protein Coding | 42 | GC01P159587 | 1.425147 | <a href="http://www.genecards.org/cgi-bin/carddisp.pl?gene=APCS">https://www.genecards.org/cgi-bin/carddisp.pl?gene=APCS</a>                   |
| RXRB          | Retinoid X Receptor Beta                                       | Protein Coding | 45 | GC06M033193 | 1.421127 | <a href="http://www.genecards.org/cgi-bin/carddisp.pl?gene=RXRB">https://www.genecards.org/cgi-bin/carddisp.pl?gene=RXRB</a>                   |
| AGPAT1        | 1-Acylglycerol-3-Phosphate O-Acyltransferase 1                 | Protein Coding | 40 | GC06M032168 | 1.421127 | <a href="http://www.genecards.org/cgi-bin/carddisp.pl?gene=AGPAT1">https://www.genecards.org/cgi-bin/carddisp.pl?gene=AGPAT1</a>               |
| VPS52         | VPS52 Subunit Of GARP Complex                                  | Protein Coding | 34 | GC06M066055 | 1.421127 | <a href="http://www.genecards.org/cgi-bin/carddisp.pl?gene=VPS52">https://www.genecards.org/cgi-bin/carddisp.pl?gene=VPS52</a>                 |
| HSALNG0049404 |                                                                | RNA Gene       | 5  | GC06M066657 | 1.421127 | <a href="http://www.genecards.org/cgi-bin/carddisp.pl?gene=HSALNG0049404">https://www.genecards.org/cgi-bin/carddisp.pl?gene=HSALNG0049404</a> |
| HSALNG0049429 |                                                                | RNA Gene       | 5  | GC06P084613 | 1.421127 | <a href="http://www.genecards.org/cgi-bin/carddisp.pl?gene=HSALNG0049429">https://www.genecards.org/cgi-bin/carddisp.pl?gene=HSALNG0049429</a> |

|                |                                          |                |    |             |          |                                                                                                                                                   |
|----------------|------------------------------------------|----------------|----|-------------|----------|---------------------------------------------------------------------------------------------------------------------------------------------------|
| lnc-HLA-DRB1-8 |                                          | RNA Gene       | 5  | GC06M032619 | 1.421127 | <a href="https://www.genecards.org/cgi-bin/carddisp.pl?gene=lnc-HLA-DRB1-8">https://www.genecards.org/cgi-bin/carddisp.pl?gene=lnc-HLA-DRB1-8</a> |
| HSALNG0049424  |                                          | RNA Gene       | 4  | GC06M066659 | 1.421127 | <a href="https://www.genecards.org/cgi-bin/carddisp.pl?gene=HSALNG0049424">https://www.genecards.org/cgi-bin/carddisp.pl?gene=HSALNG0049424</a>   |
| HSALNG0049427  |                                          | RNA Gene       | 4  | GC06P084612 | 1.421127 | <a href="https://www.genecards.org/cgi-bin/carddisp.pl?gene=HSALNG0049427">https://www.genecards.org/cgi-bin/carddisp.pl?gene=HSALNG0049427</a>   |
| HSALNG0049428  |                                          | RNA Gene       | 4  | GC06M066660 | 1.421127 | <a href="https://www.genecards.org/cgi-bin/carddisp.pl?gene=HSALNG0049428">https://www.genecards.org/cgi-bin/carddisp.pl?gene=HSALNG0049428</a>   |
| RF00017-5040   |                                          | RNA Gene       | 4  | GC06M068718 | 1.421127 | <a href="https://www.genecards.org/cgi-bin/carddisp.pl?gene=RF00017-5040">https://www.genecards.org/cgi-bin/carddisp.pl?gene=RF00017-5040</a>     |
| lnc-HLA-DOB-1  |                                          | RNA Gene       | 4  | GC06M032825 | 1.421127 | <a href="https://www.genecards.org/cgi-bin/carddisp.pl?gene=lnc-HLA-DOB-1">https://www.genecards.org/cgi-bin/carddisp.pl?gene=lnc-HLA-DOB-1</a>   |
| piR-33103-025  |                                          | RNA Gene       | 2  | GC06P086003 | 1.421127 | <a href="https://www.genecards.org/cgi-bin/carddisp.pl?gene=piR-33103-025">https://www.genecards.org/cgi-bin/carddisp.pl?gene=piR-33103-025</a>   |
| piR-35002-057  |                                          | RNA Gene       | 2  | GC06P086099 | 1.421127 | <a href="https://www.genecards.org/cgi-bin/carddisp.pl?gene=piR-35002-057">https://www.genecards.org/cgi-bin/carddisp.pl?gene=piR-35002-057</a>   |
| piR-39858-769  |                                          | RNA Gene       | 2  | GC06M068187 | 1.421127 | <a href="https://www.genecards.org/cgi-bin/carddisp.pl?gene=piR-39858-769">https://www.genecards.org/cgi-bin/carddisp.pl?gene=piR-39858-769</a>   |
| ADK            | Adenosine Kinase                         | Protein Coding | 49 | GC10P074155 | 1.420507 | <a href="https://www.genecards.org/cgi-bin/carddisp.pl?gene=ADK">https://www.genecards.org/cgi-bin/carddisp.pl?gene=ADK</a>                       |
| ITK            | IL2 Inducible T Cell Kinase              | Protein Coding | 50 | GC05P157158 | 1.418892 | <a href="https://www.genecards.org/cgi-bin/carddisp.pl?gene=ITK">https://www.genecards.org/cgi-bin/carddisp.pl?gene=ITK</a>                       |
| GRHPR          | Glyoxylate And Hydroxypyruvate Reductase | Protein Coding | 45 | GC09P047213 | 1.418892 | <a href="https://www.genecards.org/cgi-bin/carddisp.pl?gene=GRHPR">https://www.genecards.org/cgi-bin/carddisp.pl?gene=GRHPR</a>                   |
| BLZF1          | Basic Leucine Zipper Nuclear Factor 1    | Protein Coding | 38 | GC01P169367 | 1.418892 | <a href="https://www.genecards.org/cgi-bin/carddisp.pl?gene=BLZF1">https://www.genecards.org/cgi-bin/carddisp.pl?gene=BLZF1</a>                   |
| SYNJ2BP        | Synaptojanin 2 Binding Protein           | Protein Coding | 36 | GC14M070366 | 1.418892 | <a href="https://www.genecards.org/cgi-bin/carddisp.pl?gene=SYNJ2BP">https://www.genecards.org/cgi-bin/carddisp.pl?gene=SYNJ2BP</a>               |

|         |                                                                  |                |    |             |          |                                                                                                                                    |
|---------|------------------------------------------------------------------|----------------|----|-------------|----------|------------------------------------------------------------------------------------------------------------------------------------|
|         |                                                                  |                |    |             |          | <a href="http://www.genecards.org/cgi-bin/carddisp.pl?gene=SYNJ2BP">bin/carddisp.pl?gene=SYNJ2BP</a>                               |
| MIR1238 | MicroRNA 1238                                                    | RNA Gene       | 15 | GC19P010552 | 1.418892 | <a href="http://www.genecards.org/cgi-bin/carddisp.pl?gene=MIR1238">https://www.genecards.org/cgi-bin/carddisp.pl?gene=MIR1238</a> |
| MIR6069 | MicroRNA 6069                                                    | RNA Gene       | 9  | GC22M035336 | 1.418892 | <a href="http://www.genecards.org/cgi-bin/carddisp.pl?gene=MIR6069">https://www.genecards.org/cgi-bin/carddisp.pl?gene=MIR6069</a> |
| TSSK1B  | Testis Specific Serine Kinase 1B                                 | Protein Coding | 37 | GC05M113432 | 1.416734 | <a href="http://www.genecards.org/cgi-bin/carddisp.pl?gene=TSSK1B">https://www.genecards.org/cgi-bin/carddisp.pl?gene=TSSK1B</a>   |
| TSIX    | TSIX Transcript, XIST Antisense RNA                              | RNA Gene       | 17 | GC0XP073792 | 1.416734 | <a href="http://www.genecards.org/cgi-bin/carddisp.pl?gene=TSIX">https://www.genecards.org/cgi-bin/carddisp.pl?gene=TSIX</a>       |
| ANG     | Angiogenin                                                       | Protein Coding | 44 | GC14P032461 | 1.416694 | <a href="http://www.genecards.org/cgi-bin/carddisp.pl?gene=ANG">https://www.genecards.org/cgi-bin/carddisp.pl?gene=ANG</a>         |
| CDKN2C  | Cyclin Dependent Kinase Inhibitor 2C                             | Protein Coding | 43 | GC01P050960 | 1.416056 | <a href="http://www.genecards.org/cgi-bin/carddisp.pl?gene=CDKN2C">https://www.genecards.org/cgi-bin/carddisp.pl?gene=CDKN2C</a>   |
| CSTA    | Cystatin A                                                       | Protein Coding | 43 | GC03P122325 | 1.414482 | <a href="http://www.genecards.org/cgi-bin/carddisp.pl?gene=CSTA">https://www.genecards.org/cgi-bin/carddisp.pl?gene=CSTA</a>       |
| ROM1    | Retinal Outer Segment Membrane Protein 1                         | Protein Coding | 42 | GC11P062611 | 1.405944 | <a href="http://www.genecards.org/cgi-bin/carddisp.pl?gene=ROM1">https://www.genecards.org/cgi-bin/carddisp.pl?gene=ROM1</a>       |
| CLOCK   | Clock Circadian Regulator                                        | Protein Coding | 42 | GC04M055427 | 1.405062 | <a href="http://www.genecards.org/cgi-bin/carddisp.pl?gene=CLOCK">https://www.genecards.org/cgi-bin/carddisp.pl?gene=CLOCK</a>     |
| TRPC5   | Transient Receptor Potential Cation Channel Subfamily C Member 5 | Protein Coding | 41 | GC0XM111774 | 1.401049 | <a href="http://www.genecards.org/cgi-bin/carddisp.pl?gene=TRPC5">https://www.genecards.org/cgi-bin/carddisp.pl?gene=TRPC5</a>     |
| GSTM3   | Glutathione S-Transferase Mu 3                                   | Protein Coding | 45 | GC01M109733 | 1.400406 | <a href="http://www.genecards.org/cgi-bin/carddisp.pl?gene=GSTM3">https://www.genecards.org/cgi-bin/carddisp.pl?gene=GSTM3</a>     |
| MBD4    | Methyl-CpG Binding Domain 4, DNA Glycosylase                     | Protein Coding | 41 | GC03M129430 | 1.400406 | <a href="http://www.genecards.org/cgi-bin/carddisp.pl?gene=MBD4">https://www.genecards.org/cgi-bin/carddisp.pl?gene=MBD4</a>       |
| EPC1    | Enhancer Of Polycomb Homolog 1                                   | Protein Coding | 38 | GC10M033099 | 1.400406 | <a href="http://www.genecards.org/cgi-bin/carddisp.pl?gene=EPC1">https://www.genecards.org/cgi-bin/carddisp.pl?gene=EPC1</a>       |

|           |                                                   |                |    |             |          |                                                                                                                                         |
|-----------|---------------------------------------------------|----------------|----|-------------|----------|-----------------------------------------------------------------------------------------------------------------------------------------|
| LILRA5    | Leukocyte Immunoglobulin Like Receptor A5         | Protein Coding | 37 | GC19M054307 | 1.400406 | <a href="https://www.genecards.org/cgi-bin/carddisp.pl?gene=LILRA5">https://www.genecards.org/cgi-bin/carddisp.pl?gene=LILRA5</a>       |
| ENGASE    | Endo-Beta-N-Acetylglucosaminidase                 | Protein Coding | 34 | GC17P079071 | 1.400406 | <a href="https://www.genecards.org/cgi-bin/carddisp.pl?gene=ENGASE">https://www.genecards.org/cgi-bin/carddisp.pl?gene=ENGASE</a>       |
| LEAP2     | Liver Enriched Antimicrobial Peptide 2            | Protein Coding | 32 | GC05P132872 | 1.400406 | <a href="https://www.genecards.org/cgi-bin/carddisp.pl?gene=LEAP2">https://www.genecards.org/cgi-bin/carddisp.pl?gene=LEAP2</a>         |
| MIR22HG   | MIR22 Host Gene                                   | RNA Gene       | 26 | GC17M004360 | 1.400406 | <a href="https://www.genecards.org/cgi-bin/carddisp.pl?gene=MIR22HG">https://www.genecards.org/cgi-bin/carddisp.pl?gene=MIR22HG</a>     |
| LINC00305 | Long Intergenic Non-Protein Coding RNA 305        | RNA Gene       | 20 | GC18M064080 | 1.400406 | <a href="https://www.genecards.org/cgi-bin/carddisp.pl?gene=LINC00305">https://www.genecards.org/cgi-bin/carddisp.pl?gene=LINC00305</a> |
| MPZ       | Myelin Protein Zero                               | Protein Coding | 44 | GC01M161304 | 1.399909 | <a href="https://www.genecards.org/cgi-bin/carddisp.pl?gene=MPZ">https://www.genecards.org/cgi-bin/carddisp.pl?gene=MPZ</a>             |
| LYN       | LYN Proto-Oncogene, Src Family Tyrosine Kinase    | Protein Coding | 46 | GC08P055879 | 1.399825 | <a href="https://www.genecards.org/cgi-bin/carddisp.pl?gene=LYN">https://www.genecards.org/cgi-bin/carddisp.pl?gene=LYN</a>             |
| MSH6      | MutS Homolog 6                                    | Protein Coding | 48 | GC02P047695 | 1.399124 | <a href="https://www.genecards.org/cgi-bin/carddisp.pl?gene=MSH6">https://www.genecards.org/cgi-bin/carddisp.pl?gene=MSH6</a>           |
| ACTG1     | Actin Gamma 1                                     | Protein Coding | 47 | GC17M081509 | 1.399124 | <a href="https://www.genecards.org/cgi-bin/carddisp.pl?gene=ACTG1">https://www.genecards.org/cgi-bin/carddisp.pl?gene=ACTG1</a>         |
| MAP3K11   | Mitogen-Activated Protein Kinase Kinase Kinase 11 | Protein Coding | 45 | GC11M089796 | 1.399124 | <a href="https://www.genecards.org/cgi-bin/carddisp.pl?gene=MAP3K11">https://www.genecards.org/cgi-bin/carddisp.pl?gene=MAP3K11</a>     |
| DVL2      | Dishevelled Segment Polarity Protein 2            | Protein Coding | 44 | GC17M007225 | 1.399124 | <a href="https://www.genecards.org/cgi-bin/carddisp.pl?gene=DVL2">https://www.genecards.org/cgi-bin/carddisp.pl?gene=DVL2</a>           |
| PTPRS     | Protein Tyrosine Phosphatase Receptor Type S      | Protein Coding | 44 | GC19M005495 | 1.399124 | <a href="https://www.genecards.org/cgi-bin/carddisp.pl?gene=PTPRS">https://www.genecards.org/cgi-bin/carddisp.pl?gene=PTPRS</a>         |
| NDUFA13   | NADH:Ubiquinone Oxidoreductase Subunit A13        | Protein Coding | 43 | GC19P019515 | 1.399124 | <a href="https://www.genecards.org/cgi-bin/carddisp.pl?gene=NDUFA13">https://www.genecards.org/cgi-bin/carddisp.pl?gene=NDUFA13</a>     |
| CASP5     | Caspase 5                                         | Protein Coding | 42 | GC11M104995 | 1.399124 | <a href="https://www.genecards.org/cgi-bin/carddisp.pl?gene=CASP5">https://www.genecards.org/cgi-bin/carddisp.pl?gene=CASP5</a>         |

|           |                                                                      |                |    |             |          |                                                                                                                                                |
|-----------|----------------------------------------------------------------------|----------------|----|-------------|----------|------------------------------------------------------------------------------------------------------------------------------------------------|
|           |                                                                      |                |    |             |          | <a href="http://www.ncbi.nlm.nih.gov/ncbi/cdd/bin/carddisp.pl?gene=CASP5">bin/carddisp.pl?gene=CASP5</a>                                       |
| MAP3K4    | Mitogen-Activated Protein Kinase Kinase Kinase 4                     | Protein Coding | 42 | GC06P160991 | 1.399124 | <a href="http://www.ncbi.nlm.nih.gov/ncbi/cdd/bin/carddisp.pl?gene=MAP3K4">https://www.genecards.org/cgi-bin/carddisp.pl?gene=MAP3K4</a>       |
| PPM1A     | Protein Phosphatase, Mg <sup>2+</sup> /Mn <sup>2+</sup> Dependent 1A | Protein Coding | 42 | GC14P060245 | 1.399124 | <a href="http://www.ncbi.nlm.nih.gov/ncbi/cdd/bin/carddisp.pl?gene=PPM1A">https://www.genecards.org/cgi-bin/carddisp.pl?gene=PPM1A</a>         |
| KMT2C     | Lysine Methyltransferase 2C                                          | Protein Coding | 41 | GC07M152134 | 1.399124 | <a href="http://www.ncbi.nlm.nih.gov/ncbi/cdd/bin/carddisp.pl?gene=KMT2C">https://www.genecards.org/cgi-bin/carddisp.pl?gene=KMT2C</a>         |
| KLK11     | Kallikrein Related Peptidase 11                                      | Protein Coding | 40 | GC19M066201 | 1.399124 | <a href="http://www.ncbi.nlm.nih.gov/ncbi/cdd/bin/carddisp.pl?gene=KLK11">https://www.genecards.org/cgi-bin/carddisp.pl?gene=KLK11</a>         |
| NLRP2     | NLR Family Pyrin Domain Containing 2                                 | Protein Coding | 40 | GC19P054953 | 1.399124 | <a href="http://www.ncbi.nlm.nih.gov/ncbi/cdd/bin/carddisp.pl?gene=NLRP2">https://www.genecards.org/cgi-bin/carddisp.pl?gene=NLRP2</a>         |
| PPP1R15A  | Protein Phosphatase 1 Regulatory Subunit 15A                         | Protein Coding | 38 | GC19P048872 | 1.399124 | <a href="http://www.ncbi.nlm.nih.gov/ncbi/cdd/bin/carddisp.pl?gene=PPP1R15A">https://www.genecards.org/cgi-bin/carddisp.pl?gene=PPP1R15A</a>   |
| TNIP3     | TNFAIP3 Interacting Protein 3                                        | Protein Coding | 36 | GC04M121131 | 1.399124 | <a href="http://www.ncbi.nlm.nih.gov/ncbi/cdd/bin/carddisp.pl?gene=TNIP3">https://www.genecards.org/cgi-bin/carddisp.pl?gene=TNIP3</a>         |
| TNFAIP8L2 | TNF Alpha Induced Protein 8 Like 2                                   | Protein Coding | 33 | GC01P151156 | 1.399124 | <a href="http://www.ncbi.nlm.nih.gov/ncbi/cdd/bin/carddisp.pl?gene=TNFAIP8L2">https://www.genecards.org/cgi-bin/carddisp.pl?gene=TNFAIP8L2</a> |
| MIRLET7C  | MicroRNA Let-7c                                                      | RNA Gene       | 22 | GC21P016551 | 1.399124 | <a href="http://www.ncbi.nlm.nih.gov/ncbi/cdd/bin/carddisp.pl?gene=MIRLET7C">https://www.genecards.org/cgi-bin/carddisp.pl?gene=MIRLET7C</a>   |
| TIMP4     | TIMP Metallopeptidase Inhibitor 4                                    | Protein Coding | 38 | GC03M012153 | 1.398468 | <a href="http://www.ncbi.nlm.nih.gov/ncbi/cdd/bin/carddisp.pl?gene=TIMP4">https://www.genecards.org/cgi-bin/carddisp.pl?gene=TIMP4</a>         |
| COL4A5    | Collagen Type IV Alpha 5 Chain                                       | Protein Coding | 43 | GC0XP108439 | 1.397666 | <a href="http://www.ncbi.nlm.nih.gov/ncbi/cdd/bin/carddisp.pl?gene=COL4A5">https://www.genecards.org/cgi-bin/carddisp.pl?gene=COL4A5</a>       |
| CEACAM5   | CEA Cell Adhesion Molecule 5                                         | Protein Coding | 42 | GC19P066761 | 1.393224 | <a href="http://www.ncbi.nlm.nih.gov/ncbi/cdd/bin/carddisp.pl?gene=CEACAM5">https://www.genecards.org/cgi-bin/carddisp.pl?gene=CEACAM5</a>     |
| MUC16     | Mucin 16, Cell Surface Associated                                    | Protein Coding | 37 | GC19M008848 | 1.393224 | <a href="http://www.ncbi.nlm.nih.gov/ncbi/cdd/bin/carddisp.pl?gene=MUC16">https://www.genecards.org/cgi-bin/carddisp.pl?gene=MUC16</a>         |

|         |                                                |                |    |             |          |                                                                                                                                     |
|---------|------------------------------------------------|----------------|----|-------------|----------|-------------------------------------------------------------------------------------------------------------------------------------|
| ACHE    | Acetylcholinesterase (Cartwright Blood Group)  | Protein Coding | 44 | GC07M100889 | 1.393109 | <a href="https://www.genecards.org/cgi-bin/carddisp.pl?gene=ACHE">https://www.genecards.org/cgi-bin/carddisp.pl?gene=ACHE</a>       |
| ESRRA   | Estrogen Related Receptor Alpha                | Protein Coding | 46 | GC11P064305 | 1.389456 | <a href="https://www.genecards.org/cgi-bin/carddisp.pl?gene=ESRRA">https://www.genecards.org/cgi-bin/carddisp.pl?gene=ESRRA</a>     |
| GRK2    | G Protein-Coupled Receptor Kinase 2            | Protein Coding | 36 | GC11P067266 | 1.38607  | <a href="https://www.genecards.org/cgi-bin/carddisp.pl?gene=GRK2">https://www.genecards.org/cgi-bin/carddisp.pl?gene=GRK2</a>       |
| MDC1    | Mediator Of DNA Damage Checkpoint 1            | Protein Coding | 40 | GC06M065881 | 1.384277 | <a href="https://www.genecards.org/cgi-bin/carddisp.pl?gene=MDC1">https://www.genecards.org/cgi-bin/carddisp.pl?gene=MDC1</a>       |
| CACNA1I | Calcium Voltage-Gated Channel Subunit Alpha1 I | Protein Coding | 44 | GC22P039570 | 1.382956 | <a href="https://www.genecards.org/cgi-bin/carddisp.pl?gene=CACNA1I">https://www.genecards.org/cgi-bin/carddisp.pl?gene=CACNA1I</a> |
| STAB2   | Stabilin 2                                     | Protein Coding | 41 | GC12P103587 | 1.382956 | <a href="https://www.genecards.org/cgi-bin/carddisp.pl?gene=STAB2">https://www.genecards.org/cgi-bin/carddisp.pl?gene=STAB2</a>     |
| CSMD1   | CUB And Sushi Multiple Domains 1               | Protein Coding | 38 | GC08M002953 | 1.382956 | <a href="https://www.genecards.org/cgi-bin/carddisp.pl?gene=CSMD1">https://www.genecards.org/cgi-bin/carddisp.pl?gene=CSMD1</a>     |
| TOR1A   | Torsin Family 1 Member A                       | Protein Coding | 44 | GC09M129812 | 1.382589 | <a href="https://www.genecards.org/cgi-bin/carddisp.pl?gene=TOR1A">https://www.genecards.org/cgi-bin/carddisp.pl?gene=TOR1A</a>     |
| MAN2A1  | Mannosidase Alpha Class 2A Member 1            | Protein Coding | 42 | GC05P109689 | 1.381862 | <a href="https://www.genecards.org/cgi-bin/carddisp.pl?gene=MAN2A1">https://www.genecards.org/cgi-bin/carddisp.pl?gene=MAN2A1</a>   |
| CAPN1   | Calpain 1                                      | Protein Coding | 48 | GC11P069958 | 1.379053 | <a href="https://www.genecards.org/cgi-bin/carddisp.pl?gene=CAPN1">https://www.genecards.org/cgi-bin/carddisp.pl?gene=CAPN1</a>     |
| ABCB7   | ATP Binding Cassette Subfamily B Member 7      | Protein Coding | 43 | GC0XM075053 | 1.378355 | <a href="https://www.genecards.org/cgi-bin/carddisp.pl?gene=ABCB7">https://www.genecards.org/cgi-bin/carddisp.pl?gene=ABCB7</a>     |
| CFHR1   | Complement Factor H Related 1                  | Protein Coding | 42 | GC01P196822 | 1.374459 | <a href="https://www.genecards.org/cgi-bin/carddisp.pl?gene=CFHR1">https://www.genecards.org/cgi-bin/carddisp.pl?gene=CFHR1</a>     |
| RYR1    | Ryanodine Receptor 1                           | Protein Coding | 45 | GC19P066612 | 1.373652 | <a href="https://www.genecards.org/cgi-bin/carddisp.pl?gene=RYR1">https://www.genecards.org/cgi-bin/carddisp.pl?gene=RYR1</a>       |
| CDC25B  | Cell Division Cycle 25B                        | Protein Coding | 44 | GC20P004259 | 1.373163 | <a href="https://www.genecards.org/cgi-">https://www.genecards.org/cgi-</a>                                                         |

|          |                                                   |                |    |             |          |                                                                                                                                              |
|----------|---------------------------------------------------|----------------|----|-------------|----------|----------------------------------------------------------------------------------------------------------------------------------------------|
|          |                                                   |                |    |             |          | <a href="http://www.ncbi.nlm.nih.gov/ncbi/cdd/bin/carddisp.pl?gene=CDC25B">bin/carddisp.pl?gene=CDC25B</a>                                   |
| TCTA     | T Cell Leukemia Translocation Altered             | Protein Coding | 33 | GC03P049412 | 1.36799  | <a href="http://www.ncbi.nlm.nih.gov/ncbi/cdd/bin/carddisp.pl?gene=TCTA">https://www.genecards.org/cgi-bin/carddisp.pl?gene=TCTA</a>         |
| EPHB2    | EPH Receptor B2                                   | Protein Coding | 49 | GC01P022710 | 1.362989 | <a href="http://www.ncbi.nlm.nih.gov/ncbi/cdd/bin/carddisp.pl?gene=EPHB2">https://www.genecards.org/cgi-bin/carddisp.pl?gene=EPHB2</a>       |
| CA4      | Carbonic Anhydrase 4                              | Protein Coding | 45 | GC17P060149 | 1.362989 | <a href="http://www.ncbi.nlm.nih.gov/ncbi/cdd/bin/carddisp.pl?gene=CA4">https://www.genecards.org/cgi-bin/carddisp.pl?gene=CA4</a>           |
| CSTB     | Cystatin B                                        | Protein Coding | 45 | GC21M043772 | 1.362989 | <a href="http://www.ncbi.nlm.nih.gov/ncbi/cdd/bin/carddisp.pl?gene=CSTB">https://www.genecards.org/cgi-bin/carddisp.pl?gene=CSTB</a>         |
| KDM4B    | Lysine Demethylase 4B                             | Protein Coding | 45 | GC19P004969 | 1.362989 | <a href="http://www.ncbi.nlm.nih.gov/ncbi/cdd/bin/carddisp.pl?gene=KDM4B">https://www.genecards.org/cgi-bin/carddisp.pl?gene=KDM4B</a>       |
| TALDO1   | Transaldolase 1                                   | Protein Coding | 45 | GC11P001784 | 1.362989 | <a href="http://www.ncbi.nlm.nih.gov/ncbi/cdd/bin/carddisp.pl?gene=TALDO1">https://www.genecards.org/cgi-bin/carddisp.pl?gene=TALDO1</a>     |
| UNG      | Uracil DNA Glycosylase                            | Protein Coding | 45 | GC12P109097 | 1.362989 | <a href="http://www.ncbi.nlm.nih.gov/ncbi/cdd/bin/carddisp.pl?gene=UNG">https://www.genecards.org/cgi-bin/carddisp.pl?gene=UNG</a>           |
| B4GALNT1 | Beta-1,4-N-Acetyl-Galactosaminyltransferase 1     | Protein Coding | 44 | GC12M057623 | 1.362989 | <a href="http://www.ncbi.nlm.nih.gov/ncbi/cdd/bin/carddisp.pl?gene=B4GALNT1">https://www.genecards.org/cgi-bin/carddisp.pl?gene=B4GALNT1</a> |
| PARN     | Poly(A)-Specific Ribonuclease                     | Protein Coding | 44 | GC16M014435 | 1.362989 | <a href="http://www.ncbi.nlm.nih.gov/ncbi/cdd/bin/carddisp.pl?gene=PARN">https://www.genecards.org/cgi-bin/carddisp.pl?gene=PARN</a>         |
| PML      | PML Nuclear Body Scaffold                         | Protein Coding | 44 | GC15P073994 | 1.362989 | <a href="http://www.ncbi.nlm.nih.gov/ncbi/cdd/bin/carddisp.pl?gene=PML">https://www.genecards.org/cgi-bin/carddisp.pl?gene=PML</a>           |
| ROBO1    | Roundabout Guidance Receptor 1                    | Protein Coding | 44 | GC03M078597 | 1.362989 | <a href="http://www.ncbi.nlm.nih.gov/ncbi/cdd/bin/carddisp.pl?gene=ROBO1">https://www.genecards.org/cgi-bin/carddisp.pl?gene=ROBO1</a>       |
| EYA4     | EYA Transcriptional Coactivator And Phosphatase 4 | Protein Coding | 43 | GC06P133240 | 1.362989 | <a href="http://www.ncbi.nlm.nih.gov/ncbi/cdd/bin/carddisp.pl?gene=EYA4">https://www.genecards.org/cgi-bin/carddisp.pl?gene=EYA4</a>         |
| KREME N1 | Kringle Containing Transmembrane Protein 1        | Protein Coding | 43 | GC22P029073 | 1.362989 | <a href="http://www.ncbi.nlm.nih.gov/ncbi/cdd/bin/carddisp.pl?gene=KREME N1">https://www.genecards.org/cgi-bin/carddisp.pl?gene=KREME N1</a> |

|         |                                                          |                |    |             |          |                                                                                                                                     |
|---------|----------------------------------------------------------|----------------|----|-------------|----------|-------------------------------------------------------------------------------------------------------------------------------------|
| NONO    | Non-POU Domain Containing Octamer Binding                | Protein Coding | 43 | GC0XP071255 | 1.362989 | <a href="https://www.genecards.org/cgi-bin/carddisp.pl?gene=NONO">https://www.genecards.org/cgi-bin/carddisp.pl?gene=NONO</a>       |
| ABCC5   | ATP Binding Cassette Subfamily C Member 5                | Protein Coding | 42 | GC03M183919 | 1.362989 | <a href="https://www.genecards.org/cgi-bin/carddisp.pl?gene=ABCC5">https://www.genecards.org/cgi-bin/carddisp.pl?gene=ABCC5</a>     |
| CDA     | Cytidine Deaminase                                       | Protein Coding | 42 | GC01P020588 | 1.362989 | <a href="https://www.genecards.org/cgi-bin/carddisp.pl?gene=CDA">https://www.genecards.org/cgi-bin/carddisp.pl?gene=CDA</a>         |
| CLIP1   | CAP-Gly Domain Containing Linker Protein 1               | Protein Coding | 42 | GC12M122271 | 1.362989 | <a href="https://www.genecards.org/cgi-bin/carddisp.pl?gene=CLIP1">https://www.genecards.org/cgi-bin/carddisp.pl?gene=CLIP1</a>     |
| CRABP2  | Cellular Retinoic Acid Binding Protein 2                 | Protein Coding | 42 | GC01M156701 | 1.362989 | <a href="https://www.genecards.org/cgi-bin/carddisp.pl?gene=CRABP2">https://www.genecards.org/cgi-bin/carddisp.pl?gene=CRABP2</a>   |
| DCK     | Deoxycytidine Kinase                                     | Protein Coding | 42 | GC04P070992 | 1.362989 | <a href="https://www.genecards.org/cgi-bin/carddisp.pl?gene=DCK">https://www.genecards.org/cgi-bin/carddisp.pl?gene=DCK</a>         |
| DDAH1   | Dimethylarginine Dimethylaminohydrolase 1                | Protein Coding | 42 | GC01M085318 | 1.362989 | <a href="https://www.genecards.org/cgi-bin/carddisp.pl?gene=DDAH1">https://www.genecards.org/cgi-bin/carddisp.pl?gene=DDAH1</a>     |
| GADD45A | Growth Arrest And DNA Damage Inducible Alpha             | Protein Coding | 42 | GC01P067685 | 1.362989 | <a href="https://www.genecards.org/cgi-bin/carddisp.pl?gene=GADD45A">https://www.genecards.org/cgi-bin/carddisp.pl?gene=GADD45A</a> |
| GDAP1   | Ganglioside Induced Differentiation Associated Protein 1 | Protein Coding | 42 | GC08P074315 | 1.362989 | <a href="https://www.genecards.org/cgi-bin/carddisp.pl?gene=GDAP1">https://www.genecards.org/cgi-bin/carddisp.pl?gene=GDAP1</a>     |
| MKI67   | Marker Of Proliferation Ki-67                            | Protein Coding | 42 | GC10M128096 | 1.362989 | <a href="https://www.genecards.org/cgi-bin/carddisp.pl?gene=MKI67">https://www.genecards.org/cgi-bin/carddisp.pl?gene=MKI67</a>     |
| NCOR1   | Nuclear Receptor Corepressor 1                           | Protein Coding | 42 | GC17M016029 | 1.362989 | <a href="https://www.genecards.org/cgi-bin/carddisp.pl?gene=NCOR1">https://www.genecards.org/cgi-bin/carddisp.pl?gene=NCOR1</a>     |
| NIN     | Ninein                                                   | Protein Coding | 42 | GC14M050719 | 1.362989 | <a href="https://www.genecards.org/cgi-bin/carddisp.pl?gene=NIN">https://www.genecards.org/cgi-bin/carddisp.pl?gene=NIN</a>         |
| PDGFA   | Platelet Derived Growth Factor Subunit A                 | Protein Coding | 42 | GC07M000497 | 1.362989 | <a href="https://www.genecards.org/cgi-bin/carddisp.pl?gene=PDGFA">https://www.genecards.org/cgi-bin/carddisp.pl?gene=PDGFA</a>     |
| PDGFC   | Platelet Derived Growth Factor C                         | Protein Coding | 42 | GC04M156760 | 1.362989 | <a href="https://www.genecards.org/cgi-bin/carddisp.pl?gene=PDGFC">https://www.genecards.org/cgi-bin/carddisp.pl?gene=PDGFC</a>     |



|        |                                                             |                |    |             |          |                                                                                                                                   |
|--------|-------------------------------------------------------------|----------------|----|-------------|----------|-----------------------------------------------------------------------------------------------------------------------------------|
|        |                                                             |                |    |             |          | <a href="#">bin/carddisp.pl?gene=PDGFC</a>                                                                                        |
| REST   | RE1 Silencing Transcription Factor                          | Protein Coding | 42 | GC04P056907 | 1.362989 | <a href="https://www.genecards.org/cgi-bin/carddisp.pl?gene=REST">https://www.genecards.org/cgi-bin/carddisp.pl?gene=REST</a>     |
| SLC8A3 | Solute Carrier Family 8 Member A3                           | Protein Coding | 42 | GC14M070044 | 1.362989 | <a href="https://www.genecards.org/cgi-bin/carddisp.pl?gene=SLC8A3">https://www.genecards.org/cgi-bin/carddisp.pl?gene=SLC8A3</a> |
| ASH2L  | ASH2 Like, Histone Lysine Methyltransferase Complex Subunit | Protein Coding | 41 | GC08P038468 | 1.362989 | <a href="https://www.genecards.org/cgi-bin/carddisp.pl?gene=ASH2L">https://www.genecards.org/cgi-bin/carddisp.pl?gene=ASH2L</a>   |
| CAPZA1 | Capping Actin Protein Of Muscle Z-Line Subunit Alpha 1      | Protein Coding | 41 | GC01P112619 | 1.362989 | <a href="https://www.genecards.org/cgi-bin/carddisp.pl?gene=CAPZA1">https://www.genecards.org/cgi-bin/carddisp.pl?gene=CAPZA1</a> |
| CAV2   | Caveolin 2                                                  | Protein Coding | 41 | GC07P116287 | 1.362989 | <a href="https://www.genecards.org/cgi-bin/carddisp.pl?gene=CAV2">https://www.genecards.org/cgi-bin/carddisp.pl?gene=CAV2</a>     |
| CD84   | CD84 Molecule                                               | Protein Coding | 41 | GC01M160541 | 1.362989 | <a href="https://www.genecards.org/cgi-bin/carddisp.pl?gene=CD84">https://www.genecards.org/cgi-bin/carddisp.pl?gene=CD84</a>     |
| CENPJ  | Centromere Protein J                                        | Protein Coding | 41 | GC13M024882 | 1.362989 | <a href="https://www.genecards.org/cgi-bin/carddisp.pl?gene=CENPJ">https://www.genecards.org/cgi-bin/carddisp.pl?gene=CENPJ</a>   |
| FOXC1  | Forkhead Box C1                                             | Protein Coding | 41 | GC06P001610 | 1.362989 | <a href="https://www.genecards.org/cgi-bin/carddisp.pl?gene=FOXC1">https://www.genecards.org/cgi-bin/carddisp.pl?gene=FOXC1</a>   |
| HGFAC  | HGF Activator                                               | Protein Coding | 41 | GC04P003443 | 1.362989 | <a href="https://www.genecards.org/cgi-bin/carddisp.pl?gene=HGFAC">https://www.genecards.org/cgi-bin/carddisp.pl?gene=HGFAC</a>   |
| KAT7   | Lysine Acetyltransferase 7                                  | Protein Coding | 41 | GC17P049788 | 1.362989 | <a href="https://www.genecards.org/cgi-bin/carddisp.pl?gene=KAT7">https://www.genecards.org/cgi-bin/carddisp.pl?gene=KAT7</a>     |
| LPAR3  | Lysophosphatidic Acid Receptor 3                            | Protein Coding | 41 | GC01M084811 | 1.362989 | <a href="https://www.genecards.org/cgi-bin/carddisp.pl?gene=LPAR3">https://www.genecards.org/cgi-bin/carddisp.pl?gene=LPAR3</a>   |
| MTMR3  | Myotubularin Related Protein 3                              | Protein Coding | 41 | GC22P036836 | 1.362989 | <a href="https://www.genecards.org/cgi-bin/carddisp.pl?gene=MTMR3">https://www.genecards.org/cgi-bin/carddisp.pl?gene=MTMR3</a>   |
| NOX4   | NADPH Oxidase 4                                             | Protein Coding | 41 | GC11M089324 | 1.362989 | <a href="https://www.genecards.org/cgi-bin/carddisp.pl?gene=NOX4">https://www.genecards.org/cgi-bin/carddisp.pl?gene=NOX4</a>     |

|       |                                                                  |                |    |             |          |                                                                                                                                 |
|-------|------------------------------------------------------------------|----------------|----|-------------|----------|---------------------------------------------------------------------------------------------------------------------------------|
| PCSK6 | Proprotein Convertase Subtilisin/Kexin Type 6                    | Protein Coding | 41 | GC15M117314 | 1.362989 | <a href="https://www.genecards.org/cgi-bin/carddisp.pl?gene=PCSK6">https://www.genecards.org/cgi-bin/carddisp.pl?gene=PCSK6</a> |
| PRDX4 | Peroxiredoxin 4                                                  | Protein Coding | 41 | GC0XP023665 | 1.362989 | <a href="https://www.genecards.org/cgi-bin/carddisp.pl?gene=PRDX4">https://www.genecards.org/cgi-bin/carddisp.pl?gene=PRDX4</a> |
| RPL31 | Ribosomal Protein L31                                            | Protein Coding | 41 | GC02P100985 | 1.362989 | <a href="https://www.genecards.org/cgi-bin/carddisp.pl?gene=RPL31">https://www.genecards.org/cgi-bin/carddisp.pl?gene=RPL31</a> |
| SMG1  | SMG1 Nonsense Mediated MRNA Decay Associated PI3K Related Kinase | Protein Coding | 41 | GC16M019212 | 1.362989 | <a href="https://www.genecards.org/cgi-bin/carddisp.pl?gene=SMG1">https://www.genecards.org/cgi-bin/carddisp.pl?gene=SMG1</a>   |
| TFF1  | Trefoil Factor 1                                                 | Protein Coding | 41 | GC21M042362 | 1.362989 | <a href="https://www.genecards.org/cgi-bin/carddisp.pl?gene=TFF1">https://www.genecards.org/cgi-bin/carddisp.pl?gene=TFF1</a>   |
| THOP1 | Thimet Oligopeptidase 1                                          | Protein Coding | 41 | GC19P002785 | 1.362989 | <a href="https://www.genecards.org/cgi-bin/carddisp.pl?gene=THOP1">https://www.genecards.org/cgi-bin/carddisp.pl?gene=THOP1</a> |
| TTPA  | Alpha Tocopherol Transfer Protein                                | Protein Coding | 41 | GC08M063048 | 1.362989 | <a href="https://www.genecards.org/cgi-bin/carddisp.pl?gene=TTPA">https://www.genecards.org/cgi-bin/carddisp.pl?gene=TTPA</a>   |
| ASCC1 | Activating Signal Cointegrator 1 Complex Subunit 1               | Protein Coding | 40 | GC10M072096 | 1.362989 | <a href="https://www.genecards.org/cgi-bin/carddisp.pl?gene=ASCC1">https://www.genecards.org/cgi-bin/carddisp.pl?gene=ASCC1</a> |
| BRD1  | Bromodomain Containing 1                                         | Protein Coding | 40 | GC22M049773 | 1.362989 | <a href="https://www.genecards.org/cgi-bin/carddisp.pl?gene=BRD1">https://www.genecards.org/cgi-bin/carddisp.pl?gene=BRD1</a>   |
| CLDN5 | Claudin 5                                                        | Protein Coding | 40 | GC22M019523 | 1.362989 | <a href="https://www.genecards.org/cgi-bin/carddisp.pl?gene=CLDN5">https://www.genecards.org/cgi-bin/carddisp.pl?gene=CLDN5</a> |
| DHRS3 | Dehydrogenase/Reductase 3                                        | Protein Coding | 40 | GC01M012567 | 1.362989 | <a href="https://www.genecards.org/cgi-bin/carddisp.pl?gene=DHRS3">https://www.genecards.org/cgi-bin/carddisp.pl?gene=DHRS3</a> |
| FGL1  | Fibrinogen Like 1                                                | Protein Coding | 40 | GC08M017864 | 1.362989 | <a href="https://www.genecards.org/cgi-bin/carddisp.pl?gene=FGL1">https://www.genecards.org/cgi-bin/carddisp.pl?gene=FGL1</a>   |
| MEOX2 | Mesenchyme Homeobox 2                                            | Protein Coding | 40 | GC07M015617 | 1.362989 | <a href="https://www.genecards.org/cgi-bin/carddisp.pl?gene=MEOX2">https://www.genecards.org/cgi-bin/carddisp.pl?gene=MEOX2</a> |
| MINK1 | Misshapen Like Kinase 1                                          | Protein Coding | 40 | GC17P004833 | 1.362989 | <a href="https://www.genecards.org/cgi-">https://www.genecards.org/cgi-</a>                                                     |

|         |                                          |                |    |             |          |                                                                                                                                    |
|---------|------------------------------------------|----------------|----|-------------|----------|------------------------------------------------------------------------------------------------------------------------------------|
|         |                                          |                |    |             |          | <a href="http://www.ncbi.nlm.nih.gov/ncbi/cdd/bin/carddisp.pl?gene=MINK1">bin/carddisp.pl?gene=MINK1</a>                           |
| TPST1   | Tyrosylprotein Sulfotransferase 1        | Protein Coding | 40 | GC07P070512 | 1.362989 | <a href="http://www.genecards.org/cgi-bin/carddisp.pl?gene=TPST1">https://www.genecards.org/cgi-bin/carddisp.pl?gene=TPST1</a>     |
| TRAIP   | TRAF Interacting Protein                 | Protein Coding | 40 | GC03M051209 | 1.362989 | <a href="http://www.genecards.org/cgi-bin/carddisp.pl?gene=TRAIP">https://www.genecards.org/cgi-bin/carddisp.pl?gene=TRAIP</a>     |
| TRIM63  | Tripartite Motif Containing 63           | Protein Coding | 40 | GC01M026062 | 1.362989 | <a href="http://www.genecards.org/cgi-bin/carddisp.pl?gene=TRIM63">https://www.genecards.org/cgi-bin/carddisp.pl?gene=TRIM63</a>   |
| UNC5C   | Unc-5 Netrin Receptor C                  | Protein Coding | 40 | GC04M095162 | 1.362989 | <a href="http://www.genecards.org/cgi-bin/carddisp.pl?gene=UNC5C">https://www.genecards.org/cgi-bin/carddisp.pl?gene=UNC5C</a>     |
| VNN2    | Vanin 2                                  | Protein Coding | 40 | GC06M132743 | 1.362989 | <a href="http://www.genecards.org/cgi-bin/carddisp.pl?gene=VNN2">https://www.genecards.org/cgi-bin/carddisp.pl?gene=VNN2</a>       |
| BHLHE41 | Basic Helix-Loop-Helix Family Member E41 | Protein Coding | 39 | GC12M026120 | 1.362989 | <a href="http://www.genecards.org/cgi-bin/carddisp.pl?gene=BHLHE41">https://www.genecards.org/cgi-bin/carddisp.pl?gene=BHLHE41</a> |
| MBD2    | Methyl-CpG Binding Domain Protein 2      | Protein Coding | 39 | GC18M054151 | 1.362989 | <a href="http://www.genecards.org/cgi-bin/carddisp.pl?gene=MBD2">https://www.genecards.org/cgi-bin/carddisp.pl?gene=MBD2</a>       |
| SEC14L2 | SEC14 Like Lipid Binding 2               | Protein Coding | 39 | GC22P030396 | 1.362989 | <a href="http://www.genecards.org/cgi-bin/carddisp.pl?gene=SEC14L2">https://www.genecards.org/cgi-bin/carddisp.pl?gene=SEC14L2</a> |
| SV2B    | Synaptic Vesicle Glycoprotein 2B         | Protein Coding | 39 | GC15P091099 | 1.362989 | <a href="http://www.genecards.org/cgi-bin/carddisp.pl?gene=SV2B">https://www.genecards.org/cgi-bin/carddisp.pl?gene=SV2B</a>       |
| BICD1   | BICD Cargo Adaptor 1                     | Protein Coding | 38 | GC12P032107 | 1.362989 | <a href="http://www.genecards.org/cgi-bin/carddisp.pl?gene=BICD1">https://www.genecards.org/cgi-bin/carddisp.pl?gene=BICD1</a>     |
| BOK     | BCL2 Family Apoptosis Regulator BOK      | Protein Coding | 38 | GC02P241558 | 1.362989 | <a href="http://www.genecards.org/cgi-bin/carddisp.pl?gene=BOK">https://www.genecards.org/cgi-bin/carddisp.pl?gene=BOK</a>         |
| ELL     | Elongation Factor For RNA Polymerase II  | Protein Coding | 38 | GC19M018443 | 1.362989 | <a href="http://www.genecards.org/cgi-bin/carddisp.pl?gene=ELL">https://www.genecards.org/cgi-bin/carddisp.pl?gene=ELL</a>         |
| FCRL2   | Fc Receptor Like 2                       | Protein Coding | 38 | GC01M157745 | 1.362989 | <a href="http://www.genecards.org/cgi-bin/carddisp.pl?gene=FCRL2">https://www.genecards.org/cgi-bin/carddisp.pl?gene=FCRL2</a>     |

|         |                                                                    |                |    |             |          |                                                                                                                                     |
|---------|--------------------------------------------------------------------|----------------|----|-------------|----------|-------------------------------------------------------------------------------------------------------------------------------------|
| HSPB6   | Heat Shock Protein Family B (Small) Member 6                       | Protein Coding | 38 | GC19M065727 | 1.362989 | <a href="https://www.genecards.org/cgi-bin/carddisp.pl?gene=HSPB6">https://www.genecards.org/cgi-bin/carddisp.pl?gene=HSPB6</a>     |
| KCNK5   | Potassium Two Pore Domain Channel Subfamily K Member 5             | Protein Coding | 38 | GC06M066128 | 1.362989 | <a href="https://www.genecards.org/cgi-bin/carddisp.pl?gene=KCNK5">https://www.genecards.org/cgi-bin/carddisp.pl?gene=KCNK5</a>     |
| MAPRE3  | Microtubule Associated Protein RP/EB Family Member 3               | Protein Coding | 38 | GC02P026935 | 1.362989 | <a href="https://www.genecards.org/cgi-bin/carddisp.pl?gene=MAPRE3">https://www.genecards.org/cgi-bin/carddisp.pl?gene=MAPRE3</a>   |
| MIA3    | MIA SH3 Domain ER Export Factor 3                                  | Protein Coding | 38 | GC01P222618 | 1.362989 | <a href="https://www.genecards.org/cgi-bin/carddisp.pl?gene=MIA3">https://www.genecards.org/cgi-bin/carddisp.pl?gene=MIA3</a>       |
| MTDH    | Metadherin                                                         | Protein Coding | 38 | GC08P097644 | 1.362989 | <a href="https://www.genecards.org/cgi-bin/carddisp.pl?gene=MTDH">https://www.genecards.org/cgi-bin/carddisp.pl?gene=MTDH</a>       |
| OLFM4   | Olfactomedin 4                                                     | Protein Coding | 38 | GC13P053028 | 1.362989 | <a href="https://www.genecards.org/cgi-bin/carddisp.pl?gene=OLFM4">https://www.genecards.org/cgi-bin/carddisp.pl?gene=OLFM4</a>     |
| SLCO1A2 | Solute Carrier Organic Anion Transporter Family Member 1A2         | Protein Coding | 38 | GC12M021264 | 1.362989 | <a href="https://www.genecards.org/cgi-bin/carddisp.pl?gene=SLCO1A2">https://www.genecards.org/cgi-bin/carddisp.pl?gene=SLCO1A2</a> |
| BTG3    | BTG Anti-Proliferation Factor 3                                    | Protein Coding | 37 | GC21M017621 | 1.362989 | <a href="https://www.genecards.org/cgi-bin/carddisp.pl?gene=BTG3">https://www.genecards.org/cgi-bin/carddisp.pl?gene=BTG3</a>       |
| CERS6   | Ceramide Synthase 6                                                | Protein Coding | 37 | GC02P168455 | 1.362989 | <a href="https://www.genecards.org/cgi-bin/carddisp.pl?gene=CERS6">https://www.genecards.org/cgi-bin/carddisp.pl?gene=CERS6</a>     |
| CYP4F22 | Cytochrome P450 Family 4 Subfamily F Member 22                     | Protein Coding | 37 | GC19P015508 | 1.362989 | <a href="https://www.genecards.org/cgi-bin/carddisp.pl?gene=CYP4F22">https://www.genecards.org/cgi-bin/carddisp.pl?gene=CYP4F22</a> |
| EBAG9   | Estrogen Receptor Binding Site Associated Antigen 9                | Protein Coding | 37 | GC08P109536 | 1.362989 | <a href="https://www.genecards.org/cgi-bin/carddisp.pl?gene=EBAG9">https://www.genecards.org/cgi-bin/carddisp.pl?gene=EBAG9</a>     |
| GLCCI1  | Glucocorticoid Induced 1                                           | Protein Coding | 37 | GC07P007974 | 1.362989 | <a href="https://www.genecards.org/cgi-bin/carddisp.pl?gene=GLCCI1">https://www.genecards.org/cgi-bin/carddisp.pl?gene=GLCCI1</a>   |
| KHDRBS3 | KH RNA Binding Domain Containing, Signal Transduction Associated 3 | Protein Coding | 37 | GC08P135457 | 1.362989 | <a href="https://www.genecards.org/cgi-bin/carddisp.pl?gene=KHDRBS3">https://www.genecards.org/cgi-bin/carddisp.pl?gene=KHDRBS3</a> |
| NCR1    | Natural Cytotoxicity Triggering Receptor 1                         | Protein Coding | 37 | GC19P067389 | 1.362989 | <a href="https://www.genecards.org/cgi-bin/carddisp.pl?gene=NCR1">https://www.genecards.org/cgi-bin/carddisp.pl?gene=NCR1</a>       |

|         |                                              |                |    |             |          |                                                                                                                                    |
|---------|----------------------------------------------|----------------|----|-------------|----------|------------------------------------------------------------------------------------------------------------------------------------|
|         |                                              |                |    |             |          | <a href="http://www.ncbi.nlm.nih.gov/ncr1/bin/carddisp.pl?gene=NCR1">bin/carddisp.pl?gene=NCR1</a>                                 |
| NLRP6   | NLR Family Pyrin Domain Containing 6         | Protein Coding | 37 | GC11P000269 | 1.362989 | <a href="http://www.genecards.org/cgi-bin/carddisp.pl?gene=NLRP6">https://www.genecards.org/cgi-bin/carddisp.pl?gene=NLRP6</a>     |
| PDZD2   | PDZ Domain Containing 2                      | Protein Coding | 37 | GC05P031639 | 1.362989 | <a href="http://www.genecards.org/cgi-bin/carddisp.pl?gene=PDZD2">https://www.genecards.org/cgi-bin/carddisp.pl?gene=PDZD2</a>     |
| PIWIL4  | Piwi Like RNA-Mediated Gene Silencing 4      | Protein Coding | 37 | GC11P094543 | 1.362989 | <a href="http://www.genecards.org/cgi-bin/carddisp.pl?gene=PIWIL4">https://www.genecards.org/cgi-bin/carddisp.pl?gene=PIWIL4</a>   |
| SAP30BP | SAP30 Binding Protein                        | Protein Coding | 37 | GC17P075667 | 1.362989 | <a href="http://www.genecards.org/cgi-bin/carddisp.pl?gene=SAP30BP">https://www.genecards.org/cgi-bin/carddisp.pl?gene=SAP30BP</a> |
| TOR2A   | Torsin Family 2 Member A                     | Protein Coding | 37 | GC09M127800 | 1.362989 | <a href="http://www.genecards.org/cgi-bin/carddisp.pl?gene=TOR2A">https://www.genecards.org/cgi-bin/carddisp.pl?gene=TOR2A</a>     |
| YTHDF2  | YTH N6-Methyladenosine RNA Binding Protein 2 | Protein Coding | 37 | GC01P028800 | 1.362989 | <a href="http://www.genecards.org/cgi-bin/carddisp.pl?gene=YTHDF2">https://www.genecards.org/cgi-bin/carddisp.pl?gene=YTHDF2</a>   |
| ZC3HC1  | Zinc Finger C3HC-Type Containing 1           | Protein Coding | 37 | GC07M130026 | 1.362989 | <a href="http://www.genecards.org/cgi-bin/carddisp.pl?gene=ZC3HC1">https://www.genecards.org/cgi-bin/carddisp.pl?gene=ZC3HC1</a>   |
| CBLN2   | Cerebellin 2 Precursor                       | Protein Coding | 36 | GC18M072537 | 1.362989 | <a href="http://www.genecards.org/cgi-bin/carddisp.pl?gene=CBLN2">https://www.genecards.org/cgi-bin/carddisp.pl?gene=CBLN2</a>     |
| CCNG2   | Cyclin G2                                    | Protein Coding | 36 | GC04P077158 | 1.362989 | <a href="http://www.genecards.org/cgi-bin/carddisp.pl?gene=CCNG2">https://www.genecards.org/cgi-bin/carddisp.pl?gene=CCNG2</a>     |
| CNTNAP4 | Contactin Associated Protein Family Member 4 | Protein Coding | 36 | GC16P076278 | 1.362989 | <a href="http://www.genecards.org/cgi-bin/carddisp.pl?gene=CNTNAP4">https://www.genecards.org/cgi-bin/carddisp.pl?gene=CNTNAP4</a> |
| DERL1   | Derlin 1                                     | Protein Coding | 36 | GC08M123013 | 1.362989 | <a href="http://www.genecards.org/cgi-bin/carddisp.pl?gene=DERL1">https://www.genecards.org/cgi-bin/carddisp.pl?gene=DERL1</a>     |
| EMCN    | Endomucin                                    | Protein Coding | 36 | GC04M100395 | 1.362989 | <a href="http://www.genecards.org/cgi-bin/carddisp.pl?gene=EMCN">https://www.genecards.org/cgi-bin/carddisp.pl?gene=EMCN</a>       |
| GPR15   | G Protein-Coupled Receptor 15                | Protein Coding | 36 | GC03P098531 | 1.362989 | <a href="http://www.genecards.org/cgi-bin/carddisp.pl?gene=GPR15">https://www.genecards.org/cgi-bin/carddisp.pl?gene=GPR15</a>     |

|         |                                                           |                |    |             |          |                                                                                                                                     |
|---------|-----------------------------------------------------------|----------------|----|-------------|----------|-------------------------------------------------------------------------------------------------------------------------------------|
| MRPL17  | Mitochondrial Ribosomal Protein L17                       | Protein Coding | 36 | GC11M006680 | 1.362989 | <a href="https://www.genecards.org/cgi-bin/carddisp.pl?gene=MRPL17">https://www.genecards.org/cgi-bin/carddisp.pl?gene=MRPL17</a>   |
| PIWIL2  | Piwi Like RNA-Mediated Gene Silencing 2                   | Protein Coding | 36 | GC08P022275 | 1.362989 | <a href="https://www.genecards.org/cgi-bin/carddisp.pl?gene=PIWIL2">https://www.genecards.org/cgi-bin/carddisp.pl?gene=PIWIL2</a>   |
| SPAG16  | Sperm Associated Antigen 16                               | Protein Coding | 36 | GC02P213284 | 1.362989 | <a href="https://www.genecards.org/cgi-bin/carddisp.pl?gene=SPAG16">https://www.genecards.org/cgi-bin/carddisp.pl?gene=SPAG16</a>   |
| TAS2R38 | Taste 2 Receptor Member 38                                | Protein Coding | 36 | GC07M141972 | 1.362989 | <a href="https://www.genecards.org/cgi-bin/carddisp.pl?gene=TAS2R38">https://www.genecards.org/cgi-bin/carddisp.pl?gene=TAS2R38</a> |
| ARAP2   | ArfGAP With RhoGAP Domain, Ankyrin Repeat And PH Domain 2 | Protein Coding | 34 | GC04M035950 | 1.362989 | <a href="https://www.genecards.org/cgi-bin/carddisp.pl?gene=ARAP2">https://www.genecards.org/cgi-bin/carddisp.pl?gene=ARAP2</a>     |
| CASC3   | CASC3 Exon Junction Complex Subunit                       | Protein Coding | 34 | GC17P040140 | 1.362989 | <a href="https://www.genecards.org/cgi-bin/carddisp.pl?gene=CASC3">https://www.genecards.org/cgi-bin/carddisp.pl?gene=CASC3</a>     |
| CASP12  | Caspase 12 (Gene/Pseudogene)                              | Protein Coding | 34 | GC11M104885 | 1.362989 | <a href="https://www.genecards.org/cgi-bin/carddisp.pl?gene=CASP12">https://www.genecards.org/cgi-bin/carddisp.pl?gene=CASP12</a>   |
| CST2    | Cystatin SA                                               | Protein Coding | 34 | GC20M023805 | 1.362989 | <a href="https://www.genecards.org/cgi-bin/carddisp.pl?gene=CST2">https://www.genecards.org/cgi-bin/carddisp.pl?gene=CST2</a>       |
| FOXJ3   | Forkhead Box J3                                           | Protein Coding | 34 | GC01M042176 | 1.362989 | <a href="https://www.genecards.org/cgi-bin/carddisp.pl?gene=FOXJ3">https://www.genecards.org/cgi-bin/carddisp.pl?gene=FOXJ3</a>     |
| GALNT18 | Polypeptide N-Acetylgalactosaminyltransferase 18          | Protein Coding | 34 | GC11M011293 | 1.362989 | <a href="https://www.genecards.org/cgi-bin/carddisp.pl?gene=GALNT18">https://www.genecards.org/cgi-bin/carddisp.pl?gene=GALNT18</a> |
| IFNL2   | Interferon Lambda 2                                       | Protein Coding | 34 | GC19P039268 | 1.362989 | <a href="https://www.genecards.org/cgi-bin/carddisp.pl?gene=IFNL2">https://www.genecards.org/cgi-bin/carddisp.pl?gene=IFNL2</a>     |
| ALKBH5  | AlkB Homolog 5, RNA Demethylase                           | Protein Coding | 33 | GC17P018183 | 1.362989 | <a href="https://www.genecards.org/cgi-bin/carddisp.pl?gene=ALKBH5">https://www.genecards.org/cgi-bin/carddisp.pl?gene=ALKBH5</a>   |
| C1orf87 | Chromosome 1 Open Reading Frame 87                        | Protein Coding | 33 | GC01M059987 | 1.362989 | <a href="https://www.genecards.org/cgi-bin/carddisp.pl?gene=C1orf87">https://www.genecards.org/cgi-bin/carddisp.pl?gene=C1orf87</a> |
| EBF4    | EBF Family Member 4                                       | Protein Coding | 33 | GC20P004231 | 1.362989 | <a href="https://www.genecards.org/cgi-bin/carddisp.pl?gene=EBF4">https://www.genecards.org/cgi-bin/carddisp.pl?gene=EBF4</a>       |

|         |                                                         |                |    |             |          |                                                                                                                                          |
|---------|---------------------------------------------------------|----------------|----|-------------|----------|------------------------------------------------------------------------------------------------------------------------------------------|
|         |                                                         |                |    |             |          | <a href="http://www.ncbi.nlm.nih.gov/ncbi/cdd/cdddisp.pl?gene=EBF4">bin/cdddisp.pl?gene=EBF4</a>                                         |
| PCNP    | PEST Proteolytic Signal Containing Nuclear Protein      | Protein Coding | 33 | GC03P101574 | 1.362989 | <a href="http://www.ncbi.nlm.nih.gov/ncbi/cdd/cdddisp.pl?gene=PCNP">https://www.ncbi.nlm.nih.gov/ncbi/cdd/cdddisp.pl?gene=PCNP</a>       |
| TESPA1  | Thymocyte Expressed, Positive Selection Associated 1    | Protein Coding | 33 | GC12M054949 | 1.362989 | <a href="http://www.ncbi.nlm.nih.gov/ncbi/cdd/cdddisp.pl?gene=TESPA1">https://www.ncbi.nlm.nih.gov/ncbi/cdd/cdddisp.pl?gene=TESPA1</a>   |
| TTC38   | Tetratricopeptide Repeat Domain 38                      | Protein Coding | 33 | GC22P046267 | 1.362989 | <a href="http://www.ncbi.nlm.nih.gov/ncbi/cdd/cdddisp.pl?gene=TTC38">https://www.ncbi.nlm.nih.gov/ncbi/cdd/cdddisp.pl?gene=TTC38</a>     |
| NKAPL   | NFKB Activating Protein Like                            | Protein Coding | 32 | GC06P028259 | 1.362989 | <a href="http://www.ncbi.nlm.nih.gov/ncbi/cdd/cdddisp.pl?gene=NKAPL">https://www.ncbi.nlm.nih.gov/ncbi/cdd/cdddisp.pl?gene=NKAPL</a>     |
| RUBCN   | Rubicon Autophagy Regulator                             | Protein Coding | 32 | GC03M198357 | 1.362989 | <a href="http://www.ncbi.nlm.nih.gov/ncbi/cdd/cdddisp.pl?gene=RUBCN">https://www.ncbi.nlm.nih.gov/ncbi/cdd/cdddisp.pl?gene=RUBCN</a>     |
| MTREX   | Mtr4 Exosome RNA Helicase                               | Protein Coding | 30 | GC05P055308 | 1.362989 | <a href="http://www.ncbi.nlm.nih.gov/ncbi/cdd/cdddisp.pl?gene=MTREX">https://www.ncbi.nlm.nih.gov/ncbi/cdd/cdddisp.pl?gene=MTREX</a>     |
| ENHO    | Energy Homeostasis Associated                           | Protein Coding | 29 | GC09M034516 | 1.362989 | <a href="http://www.ncbi.nlm.nih.gov/ncbi/cdd/cdddisp.pl?gene=ENHO">https://www.ncbi.nlm.nih.gov/ncbi/cdd/cdddisp.pl?gene=ENHO</a>       |
| IGSF22  | Immunoglobulin Superfamily Member 22                    | Protein Coding | 28 | GC11M018705 | 1.362989 | <a href="http://www.ncbi.nlm.nih.gov/ncbi/cdd/cdddisp.pl?gene=IGSF22">https://www.ncbi.nlm.nih.gov/ncbi/cdd/cdddisp.pl?gene=IGSF22</a>   |
| PALS2   | Protein Associated With LIN7 2, MAGUK P55 Family Member | Protein Coding | 27 | GC07P024574 | 1.362989 | <a href="http://www.ncbi.nlm.nih.gov/ncbi/cdd/cdddisp.pl?gene=PALS2">https://www.ncbi.nlm.nih.gov/ncbi/cdd/cdddisp.pl?gene=PALS2</a>     |
| BLTP3A  | Bridge-Like Lipid Transfer Protein Family Member 3A     | Protein Coding | 26 | GC06P084361 | 1.362989 | <a href="http://www.ncbi.nlm.nih.gov/ncbi/cdd/cdddisp.pl?gene=BLTP3A">https://www.ncbi.nlm.nih.gov/ncbi/cdd/cdddisp.pl?gene=BLTP3A</a>   |
| PBOV1   | Prostate And Breast Cancer Overexpressed 1              | Protein Coding | 26 | GC06M138215 | 1.362989 | <a href="http://www.ncbi.nlm.nih.gov/ncbi/cdd/cdddisp.pl?gene=PBOV1">https://www.ncbi.nlm.nih.gov/ncbi/cdd/cdddisp.pl?gene=PBOV1</a>     |
| FAM215A | Family With Sequence Similarity 215 Member A            | RNA Gene       | 23 | GC17P043917 | 1.362989 | <a href="http://www.ncbi.nlm.nih.gov/ncbi/cdd/cdddisp.pl?gene=FAM215A">https://www.ncbi.nlm.nih.gov/ncbi/cdd/cdddisp.pl?gene=FAM215A</a> |
| FER1L4  | Fer-1 Like Family Member 4 (Pseudogene)                 | Pseudo gene    | 23 | GC20M035558 | 1.362989 | <a href="http://www.ncbi.nlm.nih.gov/ncbi/cdd/cdddisp.pl?gene=FER1L4">https://www.ncbi.nlm.nih.gov/ncbi/cdd/cdddisp.pl?gene=FER1L4</a>   |

|              |                                                  |                |    |             |          |                                                                                                                                               |
|--------------|--------------------------------------------------|----------------|----|-------------|----------|-----------------------------------------------------------------------------------------------------------------------------------------------|
| MIR191       | MicroRNA 191                                     | RNA Gene       | 23 | GC03M051160 | 1.362989 | <a href="https://www.genecards.org/cgi-bin/carddisp.pl?gene=MIR191">https://www.genecards.org/cgi-bin/carddisp.pl?gene=MIR191</a>             |
| HAND2-AS1    | HAND2 Antisense RNA 1                            | RNA Gene       | 21 | GC04P173527 | 1.362989 | <a href="https://www.genecards.org/cgi-bin/carddisp.pl?gene=HAND2-AS1">https://www.genecards.org/cgi-bin/carddisp.pl?gene=HAND2-AS1</a>       |
| MIR199A2     | MicroRNA 199a-2                                  | RNA Gene       | 21 | GC01M172235 | 1.362989 | <a href="https://www.genecards.org/cgi-bin/carddisp.pl?gene=MIR199A2">https://www.genecards.org/cgi-bin/carddisp.pl?gene=MIR199A2</a>         |
| MIR301A      | MicroRNA 301a                                    | RNA Gene       | 21 | GC17M059151 | 1.362989 | <a href="https://www.genecards.org/cgi-bin/carddisp.pl?gene=MIR301A">https://www.genecards.org/cgi-bin/carddisp.pl?gene=MIR301A</a>           |
| MAPKAPK5-AS1 | MAPKAPK5 Antisense RNA 1                         | RNA Gene       | 20 | GC12M111839 | 1.362989 | <a href="https://www.genecards.org/cgi-bin/carddisp.pl?gene=MAPKAPK5-AS1">https://www.genecards.org/cgi-bin/carddisp.pl?gene=MAPKAPK5-AS1</a> |
| MIR101-1     | MicroRNA 101-1                                   | RNA Gene       | 20 | GC01M065058 | 1.362989 | <a href="https://www.genecards.org/cgi-bin/carddisp.pl?gene=MIR101-1">https://www.genecards.org/cgi-bin/carddisp.pl?gene=MIR101-1</a>         |
| MIR137       | MicroRNA 137                                     | RNA Gene       | 20 | GC01M098046 | 1.362989 | <a href="https://www.genecards.org/cgi-bin/carddisp.pl?gene=MIR137">https://www.genecards.org/cgi-bin/carddisp.pl?gene=MIR137</a>             |
| MIR181A2     | MicroRNA 181a-2                                  | RNA Gene       | 20 | GC09P124692 | 1.362989 | <a href="https://www.genecards.org/cgi-bin/carddisp.pl?gene=MIR181A2">https://www.genecards.org/cgi-bin/carddisp.pl?gene=MIR181A2</a>         |
| MIR760       | MicroRNA 760                                     | RNA Gene       | 20 | GC01P093846 | 1.362989 | <a href="https://www.genecards.org/cgi-bin/carddisp.pl?gene=MIR760">https://www.genecards.org/cgi-bin/carddisp.pl?gene=MIR760</a>             |
| UMAD1        | UBAP1-MVB12-Associated (UMA) Domain Containing 1 | Protein Coding | 20 | GC07P007640 | 1.362989 | <a href="https://www.genecards.org/cgi-bin/carddisp.pl?gene=UMAD1">https://www.genecards.org/cgi-bin/carddisp.pl?gene=UMAD1</a>               |
| MIR128-1     | MicroRNA 128-1                                   | RNA Gene       | 19 | GC02P135665 | 1.362989 | <a href="https://www.genecards.org/cgi-bin/carddisp.pl?gene=MIR128-1">https://www.genecards.org/cgi-bin/carddisp.pl?gene=MIR128-1</a>         |
| MIR129-2     | MicroRNA 129-2                                   | RNA Gene       | 19 | GC11P043772 | 1.362989 | <a href="https://www.genecards.org/cgi-bin/carddisp.pl?gene=MIR129-2">https://www.genecards.org/cgi-bin/carddisp.pl?gene=MIR129-2</a>         |
| MIR29B2      | MicroRNA 29b-2                                   | RNA Gene       | 19 | GC01M207806 | 1.362989 | <a href="https://www.genecards.org/cgi-bin/carddisp.pl?gene=MIR29B2">https://www.genecards.org/cgi-bin/carddisp.pl?gene=MIR29B2</a>           |
| CBR3-AS1     | CBR3 Antisense RNA 1                             | RNA Gene       | 18 | GC21M036131 | 1.362989 | <a href="https://www.genecards.org/cgi-">https://www.genecards.org/cgi-</a>                                                                   |



|            |                                                                    |             |    |             |          |                                                                                                                                                  |
|------------|--------------------------------------------------------------------|-------------|----|-------------|----------|--------------------------------------------------------------------------------------------------------------------------------------------------|
|            |                                                                    |             |    |             |          | <a href="http://www.ncbi.nlm.nih.gov/ncbi/cdd/bin/carddisp.pl?gene=CBR3-AS1">bin/carddisp.pl?gene=CBR3-AS1</a>                                   |
| CYTOR      | Cytoskeleton Regulator RNA                                         | RNA Gene    | 18 | GC02P088103 | 1.362989 | <a href="http://www.ncbi.nlm.nih.gov/ncbi/cdd/bin/carddisp.pl?gene=CYTOR">https://www.genecards.org/cgi-bin/carddisp.pl?gene=CYTOR</a>           |
| LINC-PINT  | Long Intergenic Non-Protein Coding RNA, P53 Induced Transcript     | RNA Gene    | 18 | GC07M131004 | 1.362989 | <a href="http://www.ncbi.nlm.nih.gov/ncbi/cdd/bin/carddisp.pl?gene=LINC-PINT">https://www.genecards.org/cgi-bin/carddisp.pl?gene=LINC-PINT</a>   |
| MIR218-1   | MicroRNA 218-1                                                     | RNA Gene    | 18 | GC04P020849 | 1.362989 | <a href="http://www.ncbi.nlm.nih.gov/ncbi/cdd/bin/carddisp.pl?gene=MIR218-1">https://www.genecards.org/cgi-bin/carddisp.pl?gene=MIR218-1</a>     |
| MIR31HG    | MIR31 Host Gene                                                    | RNA Gene    | 18 | GC09M021439 | 1.362989 | <a href="http://www.ncbi.nlm.nih.gov/ncbi/cdd/bin/carddisp.pl?gene=MIR31HG">https://www.genecards.org/cgi-bin/carddisp.pl?gene=MIR31HG</a>       |
| MIR543     | MicroRNA 543                                                       | RNA Gene    | 18 | GC14P109698 | 1.362989 | <a href="http://www.ncbi.nlm.nih.gov/ncbi/cdd/bin/carddisp.pl?gene=MIR543">https://www.genecards.org/cgi-bin/carddisp.pl?gene=MIR543</a>         |
| GUSBP1     | GUSB Pseudogene 1                                                  | Pseudo gene | 17 | GC05P021337 | 1.362989 | <a href="http://www.ncbi.nlm.nih.gov/ncbi/cdd/bin/carddisp.pl?gene=GUSBP1">https://www.genecards.org/cgi-bin/carddisp.pl?gene=GUSBP1</a>         |
| LINC00452  | Long Intergenic Non-Protein Coding RNA 452                         | RNA Gene    | 17 | GC13P113884 | 1.362989 | <a href="http://www.ncbi.nlm.nih.gov/ncbi/cdd/bin/carddisp.pl?gene=LINC00452">https://www.genecards.org/cgi-bin/carddisp.pl?gene=LINC00452</a>   |
| MIR1915    | MicroRNA 1915                                                      | RNA Gene    | 17 | GC10M021496 | 1.362989 | <a href="http://www.ncbi.nlm.nih.gov/ncbi/cdd/bin/carddisp.pl?gene=MIR1915">https://www.genecards.org/cgi-bin/carddisp.pl?gene=MIR1915</a>       |
| MIR323A    | MicroRNA 323a                                                      | RNA Gene    | 17 | GC14P109973 | 1.362989 | <a href="http://www.ncbi.nlm.nih.gov/ncbi/cdd/bin/carddisp.pl?gene=MIR323A">https://www.genecards.org/cgi-bin/carddisp.pl?gene=MIR323A</a>       |
| MIR573     | MicroRNA 573                                                       | RNA Gene    | 17 | GC04M024521 | 1.362989 | <a href="http://www.ncbi.nlm.nih.gov/ncbi/cdd/bin/carddisp.pl?gene=MIR573">https://www.genecards.org/cgi-bin/carddisp.pl?gene=MIR573</a>         |
| PICSAR     | P38 Inhibited Cutaneous Squamous Cell Carcinoma Associated LincRNA | RNA Gene    | 17 | GC21M050753 | 1.362989 | <a href="http://www.ncbi.nlm.nih.gov/ncbi/cdd/bin/carddisp.pl?gene=PICSAR">https://www.genecards.org/cgi-bin/carddisp.pl?gene=PICSAR</a>         |
| SNHG14     | Small Nucleolar RNA Host Gene 14                                   | RNA Gene    | 17 | GC15P041831 | 1.362989 | <a href="http://www.ncbi.nlm.nih.gov/ncbi/cdd/bin/carddisp.pl?gene=SNHG14">https://www.genecards.org/cgi-bin/carddisp.pl?gene=SNHG14</a>         |
| TSPEAR-AS2 | TSPEAR Antisense RNA 2                                             | RNA Gene    | 17 | GC21P045172 | 1.362989 | <a href="http://www.ncbi.nlm.nih.gov/ncbi/cdd/bin/carddisp.pl?gene=TSPEAR-AS2">https://www.genecards.org/cgi-bin/carddisp.pl?gene=TSPEAR-AS2</a> |

|             |                                             |                |    |             |          |                                                                                                                                             |
|-------------|---------------------------------------------|----------------|----|-------------|----------|---------------------------------------------------------------------------------------------------------------------------------------------|
| MIR1286     | MicroRNA 1286                               | RNA Gene       | 16 | GC22M020249 | 1.362989 | <a href="https://www.genecards.org/cgi-bin/carddisp.pl?gene=MIR1286">https://www.genecards.org/cgi-bin/carddisp.pl?gene=MIR1286</a>         |
| MIR363      | MicroRNA 363                                | RNA Gene       | 16 | GC0XM134308 | 1.362989 | <a href="https://www.genecards.org/cgi-bin/carddisp.pl?gene=MIR363">https://www.genecards.org/cgi-bin/carddisp.pl?gene=MIR363</a>           |
| ZNF667-AS1  | ZNF667 Antisense RNA 1 (Head To Head)       | RNA Gene       | 16 | GC19P056477 | 1.362989 | <a href="https://www.genecards.org/cgi-bin/carddisp.pl?gene=ZNF667-AS1">https://www.genecards.org/cgi-bin/carddisp.pl?gene=ZNF667-AS1</a>   |
| MIR4423     | MicroRNA 4423                               | RNA Gene       | 15 | GC01P085133 | 1.362989 | <a href="https://www.genecards.org/cgi-bin/carddisp.pl?gene=MIR4423">https://www.genecards.org/cgi-bin/carddisp.pl?gene=MIR4423</a>         |
| MIR522      | MicroRNA 522                                | RNA Gene       | 15 | GC19P053751 | 1.362989 | <a href="https://www.genecards.org/cgi-bin/carddisp.pl?gene=MIR522">https://www.genecards.org/cgi-bin/carddisp.pl?gene=MIR522</a>           |
| IGKV2D-29   | Immunoglobulin Kappa Variable 2D-29         | Protein Coding | 14 | GC02P091319 | 1.362989 | <a href="https://www.genecards.org/cgi-bin/carddisp.pl?gene=IGKV2D-29">https://www.genecards.org/cgi-bin/carddisp.pl?gene=IGKV2D-29</a>     |
| MIR5196     | MicroRNA 5196                               | RNA Gene       | 14 | GC19P066536 | 1.362989 | <a href="https://www.genecards.org/cgi-bin/carddisp.pl?gene=MIR5196">https://www.genecards.org/cgi-bin/carddisp.pl?gene=MIR5196</a>         |
| MIR523      | MicroRNA 523                                | RNA Gene       | 14 | GC19P053698 | 1.362989 | <a href="https://www.genecards.org/cgi-bin/carddisp.pl?gene=MIR523">https://www.genecards.org/cgi-bin/carddisp.pl?gene=MIR523</a>           |
| LINC01483   | Long Intergenic Non-Protein Coding RNA 1483 | RNA Gene       | 13 | GC17P069577 | 1.362989 | <a href="https://www.genecards.org/cgi-bin/carddisp.pl?gene=LINC01483">https://www.genecards.org/cgi-bin/carddisp.pl?gene=LINC01483</a>     |
| TSPOAP1-AS1 | TSPOAP1, SUPT4H1 And RNF43 Antisense RNA 1  | RNA Gene       | 13 | GC17P058326 | 1.362989 | <a href="https://www.genecards.org/cgi-bin/carddisp.pl?gene=TSPOAP1-AS1">https://www.genecards.org/cgi-bin/carddisp.pl?gene=TSPOAP1-AS1</a> |
| LOC730100   | Uncharacterized LOC730100                   | RNA Gene       | 12 | GC02P051033 | 1.362989 | <a href="https://www.genecards.org/cgi-bin/carddisp.pl?gene=LOC730100">https://www.genecards.org/cgi-bin/carddisp.pl?gene=LOC730100</a>     |
| MIR5571     | MicroRNA 5571                               | RNA Gene       | 11 | GC22P022886 | 1.362989 | <a href="https://www.genecards.org/cgi-bin/carddisp.pl?gene=MIR5571">https://www.genecards.org/cgi-bin/carddisp.pl?gene=MIR5571</a>         |
| CLYBL-AS3   | CLYBL Antisense RNA 3                       | RNA Gene       | 10 | GC13M099741 | 1.362989 | <a href="https://www.genecards.org/cgi-bin/carddisp.pl?gene=CLYBL-AS3">https://www.genecards.org/cgi-bin/carddisp.pl?gene=CLYBL-AS3</a>     |

|              |                                                            |                   |    |             |          |                                                                                                                                               |
|--------------|------------------------------------------------------------|-------------------|----|-------------|----------|-----------------------------------------------------------------------------------------------------------------------------------------------|
| HSPE1P1      | Heat Shock Protein Family E (Hsp10) Member 1 Pseudogene 1  | Pseudo gene       | 9  | GC20M039932 | 1.362989 | <a href="https://www.genecards.org/cgi-bin/carddisp.pl?gene=HSPE1P1">https://www.genecards.org/cgi-bin/carddisp.pl?gene=HSPE1P1</a>           |
| CYP4F23P     | Cytochrome P450 Family 4 Subfamily F Member 23, Pseudogene | Pseudo gene       | 8  | GC19P015822 | 1.362989 | <a href="https://www.genecards.org/cgi-bin/carddisp.pl?gene=CYP4F23P">https://www.genecards.org/cgi-bin/carddisp.pl?gene=CYP4F23P</a>         |
| RPL31P31     | Ribosomal Protein L31 Pseudogene 31                        | Pseudo gene       | 8  | GC04P033972 | 1.362989 | <a href="https://www.genecards.org/cgi-bin/carddisp.pl?gene=RPL31P31">https://www.genecards.org/cgi-bin/carddisp.pl?gene=RPL31P31</a>         |
| CDR1-AS      | CDR1 Antisense RNA                                         | RNA Gene          | 7  | GC0XU902169 | 1.362989 | <a href="https://www.genecards.org/cgi-bin/carddisp.pl?gene=CDR1-AS">https://www.genecards.org/cgi-bin/carddisp.pl?gene=CDR1-AS</a>           |
| MRPS35P1     | Mitochondrial Ribosomal Protein S35 Pseudogene 1           | Pseudo gene       | 6  | GC03P005446 | 1.362989 | <a href="https://www.genecards.org/cgi-bin/carddisp.pl?gene=MRPS35P1">https://www.genecards.org/cgi-bin/carddisp.pl?gene=MRPS35P1</a>         |
| MS           | Multiple Sclerosis                                         | Genetic Locus     | 4  | GC00U990205 | 1.362989 | <a href="https://www.genecards.org/cgi-bin/carddisp.pl?gene=MS">https://www.genecards.org/cgi-bin/carddisp.pl?gene=MS</a>                     |
| NTT          | Noncoding Transcript In T Cells                            | RNA Gene          | 3  | GC06U990159 | 1.362989 | <a href="https://www.genecards.org/cgi-bin/carddisp.pl?gene=NTT">https://www.genecards.org/cgi-bin/carddisp.pl?gene=NTT</a>                   |
| LOC110973015 | NOS3 5' Regulatory Region                                  | Biological Region | 2  | GC07P150988 | 1.362989 | <a href="https://www.genecards.org/cgi-bin/carddisp.pl?gene=LOC110973015">https://www.genecards.org/cgi-bin/carddisp.pl?gene=LOC110973015</a> |
| SCNN1A       | Sodium Channel Epithelial 1 Subunit Alpha                  | Protein Coding    | 46 | GC12M006346 | 1.361563 | <a href="https://www.genecards.org/cgi-bin/carddisp.pl?gene=SCNN1A">https://www.genecards.org/cgi-bin/carddisp.pl?gene=SCNN1A</a>             |
| NCAPD2       | Non-SMC Condensin I Complex Subunit D2                     | Protein Coding    | 40 | GC12P006493 | 1.361563 | <a href="https://www.genecards.org/cgi-bin/carddisp.pl?gene=NCAPD2">https://www.genecards.org/cgi-bin/carddisp.pl?gene=NCAPD2</a>             |
| CDCA3        | Cell Division Cycle Associated 3                           | Protein Coding    | 37 | GC12M006844 | 1.361563 | <a href="https://www.genecards.org/cgi-bin/carddisp.pl?gene=CDCA3">https://www.genecards.org/cgi-bin/carddisp.pl?gene=CDCA3</a>               |
| S100A3       | S100 Calcium Binding Protein A3                            | Protein Coding    | 37 | GC01M153547 | 1.361563 | <a href="https://www.genecards.org/cgi-bin/carddisp.pl?gene=S100A3">https://www.genecards.org/cgi-bin/carddisp.pl?gene=S100A3</a>             |
| UBAP2L       | Ubiquitin Associated Protein 2 Like                        | Protein Coding    | 37 | GC01P154219 | 1.361563 | <a href="https://www.genecards.org/cgi-bin/carddisp.pl?gene=UBAP2L">https://www.genecards.org/cgi-bin/carddisp.pl?gene=UBAP2L</a>             |
| ZNF384       | Zinc Finger Protein 384                                    | Protein Coding    | 37 | GC12M006903 | 1.361563 | <a href="https://www.genecards.org/cgi-bin/carddisp.pl?gene=ZNF384">https://www.genecards.org/cgi-bin/carddisp.pl?gene=ZNF384</a>             |

|         |                                                          |                |    |             |          |                                                                                                                                            |
|---------|----------------------------------------------------------|----------------|----|-------------|----------|--------------------------------------------------------------------------------------------------------------------------------------------|
|         |                                                          |                |    |             |          | <a href="http://www.ncbi.nlm.nih.gov/ncbi/cdd/bin/carddisp.pl?gene=ZNF384">bin/carddisp.pl?gene=ZNF384</a>                                 |
| AQP10   | Aquaporin 10                                             | Protein Coding | 36 | GC01P154321 | 1.361563 | <a href="http://www.ncbi.nlm.nih.gov/ncbi/cdd/bin/carddisp.pl?gene=AQP10">https://www.genecards.org/cgi-bin/carddisp.pl?gene=AQP10</a>     |
| CH25H   | Cholesterol 25-Hydroxylase                               | Protein Coding | 36 | GC10M089205 | 1.361563 | <a href="http://www.ncbi.nlm.nih.gov/ncbi/cdd/bin/carddisp.pl?gene=CH25H">https://www.genecards.org/cgi-bin/carddisp.pl?gene=CH25H</a>     |
| NOP2    | NOP2 Nucleolar Protein                                   | Protein Coding | 36 | GC12M006556 | 1.361563 | <a href="http://www.ncbi.nlm.nih.gov/ncbi/cdd/bin/carddisp.pl?gene=NOP2">https://www.genecards.org/cgi-bin/carddisp.pl?gene=NOP2</a>       |
| UBE2Q1  | Ubiquitin Conjugating Enzyme E2 Q1                       | Protein Coding | 36 | GC01M154548 | 1.361563 | <a href="http://www.ncbi.nlm.nih.gov/ncbi/cdd/bin/carddisp.pl?gene=UBE2Q1">https://www.genecards.org/cgi-bin/carddisp.pl?gene=UBE2Q1</a>   |
| TOMM7   | Translocase Of Outer Mitochondrial Membrane 7            | Protein Coding | 35 | GC07M022816 | 1.361563 | <a href="http://www.ncbi.nlm.nih.gov/ncbi/cdd/bin/carddisp.pl?gene=TOMM7">https://www.genecards.org/cgi-bin/carddisp.pl?gene=TOMM7</a>     |
| LONRF2  | LON Peptidase N-Terminal Domain And Ring Finger 2        | Protein Coding | 34 | GC02M100274 | 1.361563 | <a href="http://www.ncbi.nlm.nih.gov/ncbi/cdd/bin/carddisp.pl?gene=LONRF2">https://www.genecards.org/cgi-bin/carddisp.pl?gene=LONRF2</a>   |
| SPSB2   | SplA/Ryanodine Receptor Domain And SOCS Box Containing 2 | Protein Coding | 34 | GC12M006918 | 1.361563 | <a href="http://www.ncbi.nlm.nih.gov/ncbi/cdd/bin/carddisp.pl?gene=SPSB2">https://www.genecards.org/cgi-bin/carddisp.pl?gene=SPSB2</a>     |
| TAPBPL  | TAP Binding Protein Like                                 | Protein Coding | 34 | GC12P006451 | 1.361563 | <a href="http://www.ncbi.nlm.nih.gov/ncbi/cdd/bin/carddisp.pl?gene=TAPBPL">https://www.genecards.org/cgi-bin/carddisp.pl?gene=TAPBPL</a>   |
| PLEKHG6 | Pleckstrin Homology And RhoGEF Domain Containing G6      | Protein Coding | 33 | GC12P006310 | 1.361563 | <a href="http://www.ncbi.nlm.nih.gov/ncbi/cdd/bin/carddisp.pl?gene=PLEKHG6">https://www.genecards.org/cgi-bin/carddisp.pl?gene=PLEKHG6</a> |
| RMI2    | RecQ Mediated Genome Instability 2                       | Protein Coding | 33 | GC16P012113 | 1.361563 | <a href="http://www.ncbi.nlm.nih.gov/ncbi/cdd/bin/carddisp.pl?gene=RMI2">https://www.genecards.org/cgi-bin/carddisp.pl?gene=RMI2</a>       |
| SHE     | Src Homology 2 Domain Containing E                       | Protein Coding | 33 | GC01M154556 | 1.361563 | <a href="http://www.ncbi.nlm.nih.gov/ncbi/cdd/bin/carddisp.pl?gene=SHE">https://www.genecards.org/cgi-bin/carddisp.pl?gene=SHE</a>         |
| IFFO1   | Intermediate Filament Family Orphan 1                    | Protein Coding | 32 | GC12M006538 | 1.361563 | <a href="http://www.ncbi.nlm.nih.gov/ncbi/cdd/bin/carddisp.pl?gene=IFFO1">https://www.genecards.org/cgi-bin/carddisp.pl?gene=IFFO1</a>     |
| PRM1    | Protamine 1                                              | Protein Coding | 30 | GC16M012266 | 1.361563 | <a href="http://www.ncbi.nlm.nih.gov/ncbi/cdd/bin/carddisp.pl?gene=PRM1">https://www.genecards.org/cgi-bin/carddisp.pl?gene=PRM1</a>       |

|                 |                                                    |                |    |             |          |                                                                                                                                                     |
|-----------------|----------------------------------------------------|----------------|----|-------------|----------|-----------------------------------------------------------------------------------------------------------------------------------------------------|
| TDRD10          | Tudor Domain Containing 10                         | Protein Coding | 29 | GC01P154502 | 1.361563 | <a href="https://www.genecards.org/cgi-bin/carddisp.pl?gene=TDRD10">https://www.genecards.org/cgi-bin/carddisp.pl?gene=TDRD10</a>                   |
| CFAP141         | Cilia And Flagella Associated Protein 141          | Protein Coding | 21 | GC01M154200 | 1.361563 | <a href="https://www.genecards.org/cgi-bin/carddisp.pl?gene=CFAP141">https://www.genecards.org/cgi-bin/carddisp.pl?gene=CFAP141</a>                 |
| LOC400499       | Putative Uncharacterized Protein LOC400499         | Protein Coding | 21 | GC16M012281 | 1.361563 | <a href="https://www.genecards.org/cgi-bin/carddisp.pl?gene=LOC400499">https://www.genecards.org/cgi-bin/carddisp.pl?gene=LOC400499</a>             |
| SCARNA12        | Small Cajal Body-Specific RNA 12                   | RNA Gene       | 21 | GC12M007743 | 1.361563 | <a href="https://www.genecards.org/cgi-bin/carddisp.pl?gene=SCARNA12">https://www.genecards.org/cgi-bin/carddisp.pl?gene=SCARNA12</a>               |
| ACTA2-AS1       | ACTA2 Antisense RNA 1                              | RNA Gene       | 16 | GC10P088932 | 1.361563 | <a href="https://www.genecards.org/cgi-bin/carddisp.pl?gene=ACTA2-AS1">https://www.genecards.org/cgi-bin/carddisp.pl?gene=ACTA2-AS1</a>             |
| CD27-AS1        | CD27 Antisense RNA 1                               | RNA Gene       | 16 | GC12M006439 | 1.361563 | <a href="https://www.genecards.org/cgi-bin/carddisp.pl?gene=CD27-AS1">https://www.genecards.org/cgi-bin/carddisp.pl?gene=CD27-AS1</a>               |
| IL6R-AS1        | IL6R Antisense RNA 1                               | RNA Gene       | 12 | GC01M154544 | 1.361563 | <a href="https://www.genecards.org/cgi-bin/carddisp.pl?gene=IL6R-AS1">https://www.genecards.org/cgi-bin/carddisp.pl?gene=IL6R-AS1</a>               |
| SNORA58B        | Small Nucleolar RNA, H/ACA Box 58B                 | RNA Gene       | 12 | GC01P154261 | 1.361563 | <a href="https://www.genecards.org/cgi-bin/carddisp.pl?gene=SNORA58B">https://www.genecards.org/cgi-bin/carddisp.pl?gene=SNORA58B</a>               |
| UBE2Q1-AS1      | UBE2Q1 Antisense RNA 1                             | RNA Gene       | 12 | GC01P154553 | 1.361563 | <a href="https://www.genecards.org/cgi-bin/carddisp.pl?gene=UBE2Q1-AS1">https://www.genecards.org/cgi-bin/carddisp.pl?gene=UBE2Q1-AS1</a>           |
| LINC01845       | Long Intergenic Non-Protein Coding RNA 1845        | RNA Gene       | 10 | GC05M159448 | 1.361563 | <a href="https://www.genecards.org/cgi-bin/carddisp.pl?gene=LINC01845">https://www.genecards.org/cgi-bin/carddisp.pl?gene=LINC01845</a>             |
| ENSG00000256433 | Novel Transcript                                   | RNA Gene       | 9  | GC12P006393 | 1.361563 | <a href="https://www.genecards.org/cgi-bin/carddisp.pl?gene=ENSG00000256433">https://www.genecards.org/cgi-bin/carddisp.pl?gene=ENSG00000256433</a> |
| PSMD8P1         | Proteasome 26S Subunit, Non-ATPase, 8 Pseudogene 1 | Pseudo gene    | 9  | GC01M154414 | 1.361563 | <a href="https://www.genecards.org/cgi-bin/carddisp.pl?gene=PSMD8P1">https://www.genecards.org/cgi-bin/carddisp.pl?gene=PSMD8P1</a>                 |
| RNU7-57P        | RNA, U7 Small Nuclear 57 Pseudogene                | Pseudo gene    | 9  | GC01P154382 | 1.361563 | <a href="https://www.genecards.org/cgi-bin/carddisp.pl?gene=RNU7-57P">https://www.genecards.org/cgi-bin/carddisp.pl?gene=RNU7-57P</a>               |
| ENSG00000219410 | Novel Transcript                                   | RNA Gene       | 8  | GC12P021065 | 1.361563 | <a href="https://www.genecards.org/cgi-bin/carddisp.pl?gene=ENSG00000219410">https://www.genecards.org/cgi-bin/carddisp.pl?gene=ENSG00000219410</a> |

|                 |                                                                |               |   |             |          |                                                                                                                                                     |
|-----------------|----------------------------------------------------------------|---------------|---|-------------|----------|-----------------------------------------------------------------------------------------------------------------------------------------------------|
|                 |                                                                |               |   |             |          | <a href="https://www.genecards.org/cgi-bin/carddisp.pl?gene=ENSG00000219410">bin/carddisp.pl?gene=ENSG00000219410</a>                               |
| ENSG00000286116 | FAS Antisense RNA 1                                            | Uncategorized | 8 | GC10M088990 | 1.361563 | <a href="https://www.genecards.org/cgi-bin/carddisp.pl?gene=ENSG00000286116">https://www.genecards.org/cgi-bin/carddisp.pl?gene=ENSG00000286116</a> |
| ENSG00000247853 | Novel Transcript, Antisense To CHD4                            | RNA Gene      | 7 | GC12P021050 | 1.361563 | <a href="https://www.genecards.org/cgi-bin/carddisp.pl?gene=ENSG00000247853">https://www.genecards.org/cgi-bin/carddisp.pl?gene=ENSG00000247853</a> |
| ENSG00000225544 | Pseudogene Similar To Part Of Metallophosphoesterase 1 (MPPE1) | Pseudogene    | 6 | GC22M021885 | 1.361563 | <a href="https://www.genecards.org/cgi-bin/carddisp.pl?gene=ENSG00000225544">https://www.genecards.org/cgi-bin/carddisp.pl?gene=ENSG00000225544</a> |
| RAB1AP1         | RAB1A Pseudogene 1                                             | Pseudogene    | 6 | GC02M190993 | 1.361563 | <a href="https://www.genecards.org/cgi-bin/carddisp.pl?gene=RAB1AP1">https://www.genecards.org/cgi-bin/carddisp.pl?gene=RAB1AP1</a>                 |
| MF281465        |                                                                | RNA Gene      | 5 | GC02M191013 | 1.361563 | <a href="https://www.genecards.org/cgi-bin/carddisp.pl?gene=MF281465">https://www.genecards.org/cgi-bin/carddisp.pl?gene=MF281465</a>               |
| MTCYBP42        | MT-CYB Pseudogene 42                                           | Pseudogene    | 5 | GC07M022748 | 1.361563 | <a href="https://www.genecards.org/cgi-bin/carddisp.pl?gene=MTCYBP42">https://www.genecards.org/cgi-bin/carddisp.pl?gene=MTCYBP42</a>               |
| lnc-HLA-DQB1-2  |                                                                | RNA Gene      | 5 | GC06M066017 | 1.361563 | <a href="https://www.genecards.org/cgi-bin/carddisp.pl?gene=lnc-HLA-DQB1-2">https://www.genecards.org/cgi-bin/carddisp.pl?gene=lnc-HLA-DQB1-2</a>   |
| lnc-PLEKHG6-5   |                                                                | RNA Gene      | 5 | GC12P021034 | 1.361563 | <a href="https://www.genecards.org/cgi-bin/carddisp.pl?gene=lnc-PLEKHG6-5">https://www.genecards.org/cgi-bin/carddisp.pl?gene=lnc-PLEKHG6-5</a>     |
| lnc-PRM1-3      |                                                                | RNA Gene      | 5 | GC16M012282 | 1.361563 | <a href="https://www.genecards.org/cgi-bin/carddisp.pl?gene=lnc-PRM1-3">https://www.genecards.org/cgi-bin/carddisp.pl?gene=lnc-PRM1-3</a>           |
| lnc-PRM1-5      |                                                                | RNA Gene      | 5 | GC16M012280 | 1.361563 | <a href="https://www.genecards.org/cgi-bin/carddisp.pl?gene=lnc-PRM1-5">https://www.genecards.org/cgi-bin/carddisp.pl?gene=lnc-PRM1-5</a>           |
| lnc-RMI2-2      |                                                                | RNA Gene      | 5 | GC16P012119 | 1.361563 | <a href="https://www.genecards.org/cgi-bin/carddisp.pl?gene=lnc-RMI2-2">https://www.genecards.org/cgi-bin/carddisp.pl?gene=lnc-RMI2-2</a>           |
| ENSG00000262636 | Mitochondrial Ribosomal Protein L18 (MRPL18) Pseudogene        | Pseudogene    | 4 | GC16M012284 | 1.361563 | <a href="https://www.genecards.org/cgi-bin/carddisp.pl?gene=ENSG00000262636">https://www.genecards.org/cgi-bin/carddisp.pl?gene=ENSG00000262636</a> |
| HSALNG0049436   |                                                                | RNA Gene      | 4 | GC06P084614 | 1.361563 | <a href="https://www.genecards.org/cgi-bin/carddisp.pl?gene=HSALNG0049436">https://www.genecards.org/cgi-bin/carddisp.pl?gene=HSALNG0049436</a>     |

|               |                                               |                |    |             |          |                                                                                                                                                 |
|---------------|-----------------------------------------------|----------------|----|-------------|----------|-------------------------------------------------------------------------------------------------------------------------------------------------|
| HSALNG0075913 |                                               | RNA Gene       | 4  | GC10P006045 | 1.361563 | <a href="https://www.genecards.org/cgi-bin/carddisp.pl?gene=HSALNG0075913">https://www.genecards.org/cgi-bin/carddisp.pl?gene=HSALNG0075913</a> |
| HSALNG0079553 |                                               | RNA Gene       | 4  | GC10M088999 | 1.361563 | <a href="https://www.genecards.org/cgi-bin/carddisp.pl?gene=HSALNG0079553">https://www.genecards.org/cgi-bin/carddisp.pl?gene=HSALNG0079553</a> |
| HSALNG0088851 |                                               | RNA Gene       | 4  | GC12P021614 | 1.361563 | <a href="https://www.genecards.org/cgi-bin/carddisp.pl?gene=HSALNG0088851">https://www.genecards.org/cgi-bin/carddisp.pl?gene=HSALNG0088851</a> |
| HSALNG0088852 |                                               | RNA Gene       | 4  | GC12P021615 | 1.361563 | <a href="https://www.genecards.org/cgi-bin/carddisp.pl?gene=HSALNG0088852">https://www.genecards.org/cgi-bin/carddisp.pl?gene=HSALNG0088852</a> |
| LOC105371082  | Uncharacterized LOC105371082                  | RNA Gene       | 4  | GC16P011249 | 1.361563 | <a href="https://www.genecards.org/cgi-bin/carddisp.pl?gene=LOC105371082">https://www.genecards.org/cgi-bin/carddisp.pl?gene=LOC105371082</a>   |
| RF00017-3467  |                                               | RNA Gene       | 4  | GC22P038730 | 1.361563 | <a href="https://www.genecards.org/cgi-bin/carddisp.pl?gene=RF00017-3467">https://www.genecards.org/cgi-bin/carddisp.pl?gene=RF00017-3467</a>   |
| RF00017-3468  |                                               | RNA Gene       | 4  | GC22P038733 | 1.361563 | <a href="https://www.genecards.org/cgi-bin/carddisp.pl?gene=RF00017-3468">https://www.genecards.org/cgi-bin/carddisp.pl?gene=RF00017-3468</a>   |
| piR-49732-033 |                                               | RNA Gene       | 4  | GC10M006055 | 1.361563 | <a href="https://www.genecards.org/cgi-bin/carddisp.pl?gene=piR-49732-033">https://www.genecards.org/cgi-bin/carddisp.pl?gene=piR-49732-033</a> |
| CDKN2B-AS1    | CDKN2B Antisense RNA 1                        | RNA Gene       | 22 | GC09P021994 | 1.360434 | <a href="https://www.genecards.org/cgi-bin/carddisp.pl?gene=CDKN2B-AS1">https://www.genecards.org/cgi-bin/carddisp.pl?gene=CDKN2B-AS1</a>       |
| RICTOR        | RPTOR Independent Companion Of MTOR Complex 2 | Protein Coding | 42 | GC05M038937 | 1.359894 | <a href="https://www.genecards.org/cgi-bin/carddisp.pl?gene=RICTOR">https://www.genecards.org/cgi-bin/carddisp.pl?gene=RICTOR</a>               |
| GALNS         | Galactosamine (N-Acetyl)-6-Sulfatase          | Protein Coding | 46 | GC16M088813 | 1.358621 | <a href="https://www.genecards.org/cgi-bin/carddisp.pl?gene=GALNS">https://www.genecards.org/cgi-bin/carddisp.pl?gene=GALNS</a>                 |
| C4BPB         | Complement Component 4 Binding Protein Beta   | Protein Coding | 40 | GC01P207088 | 1.356425 | <a href="https://www.genecards.org/cgi-bin/carddisp.pl?gene=C4BPB">https://www.genecards.org/cgi-bin/carddisp.pl?gene=C4BPB</a>                 |
| TTF2          | Transcription Termination Factor 2            | Protein Coding | 39 | GC01P117060 | 1.356425 | <a href="https://www.genecards.org/cgi-bin/carddisp.pl?gene=TTF2">https://www.genecards.org/cgi-bin/carddisp.pl?gene=TTF2</a>                   |
| TRIP11        | Thyroid Hormone Receptor Interactor 11        | Protein Coding | 41 | GC14M091965 | 1.355733 | <a href="https://www.genecards.org/cgi-bin/carddisp.pl?gene=TRIP11">https://www.genecards.org/cgi-bin/carddisp.pl?gene=TRIP11</a>               |

|          |                                              |                |    |             |          |                                                                                                                                              |
|----------|----------------------------------------------|----------------|----|-------------|----------|----------------------------------------------------------------------------------------------------------------------------------------------|
|          |                                              |                |    |             |          | <a href="http://www.ncbi.nlm.nih.gov/ncbi/cdd/bin/carddisp.pl?gene=TRIP11">bin/carddisp.pl?gene=TRIP11</a>                                   |
| CCBE1    | Collagen And Calcium Binding EGF Domains 1   | Protein Coding | 41 | GC18M059430 | 1.353179 | <a href="http://www.ncbi.nlm.nih.gov/ncbi/cdd/bin/carddisp.pl?gene=CCBE1">https://www.genecards.org/cgi-bin/carddisp.pl?gene=CCBE1</a>       |
| S100A7   | S100 Calcium Binding Protein A7              | Protein Coding | 39 | GC01M153457 | 1.350399 | <a href="http://www.ncbi.nlm.nih.gov/ncbi/cdd/bin/carddisp.pl?gene=S100A7">https://www.genecards.org/cgi-bin/carddisp.pl?gene=S100A7</a>     |
| SEMA5A   | Semaphorin 5A                                | Protein Coding | 40 | GC05M009036 | 1.350374 | <a href="http://www.ncbi.nlm.nih.gov/ncbi/cdd/bin/carddisp.pl?gene=SEMA5A">https://www.genecards.org/cgi-bin/carddisp.pl?gene=SEMA5A</a>     |
| SPZ1     | Spermatogenic Leucine Zipper 1               | Protein Coding | 34 | GC05P080319 | 1.350374 | <a href="http://www.ncbi.nlm.nih.gov/ncbi/cdd/bin/carddisp.pl?gene=SPZ1">https://www.genecards.org/cgi-bin/carddisp.pl?gene=SPZ1</a>         |
| ERN1     | Endoplasmic Reticulum To Nucleus Signaling 1 | Protein Coding | 44 | GC17M064039 | 1.345868 | <a href="http://www.ncbi.nlm.nih.gov/ncbi/cdd/bin/carddisp.pl?gene=ERN1">https://www.genecards.org/cgi-bin/carddisp.pl?gene=ERN1</a>         |
| LTC4S    | Leukotriene C4 Synthase                      | Protein Coding | 41 | GC05P179793 | 1.339262 | <a href="http://www.ncbi.nlm.nih.gov/ncbi/cdd/bin/carddisp.pl?gene=LTC4S">https://www.genecards.org/cgi-bin/carddisp.pl?gene=LTC4S</a>       |
| MIR24-1  | MicroRNA 24-1                                | RNA Gene       | 20 | GC09P095086 | 1.338933 | <a href="http://www.ncbi.nlm.nih.gov/ncbi/cdd/bin/carddisp.pl?gene=MIR24-1">https://www.genecards.org/cgi-bin/carddisp.pl?gene=MIR24-1</a>   |
| CNTNAP2  | Contactin Associated Protein 2               | Protein Coding | 43 | GC07P146116 | 1.337749 | <a href="http://www.ncbi.nlm.nih.gov/ncbi/cdd/bin/carddisp.pl?gene=CNTNAP2">https://www.genecards.org/cgi-bin/carddisp.pl?gene=CNTNAP2</a>   |
| UCN3     | Urocortin 3                                  | Protein Coding | 36 | GC10P005396 | 1.334767 | <a href="http://www.ncbi.nlm.nih.gov/ncbi/cdd/bin/carddisp.pl?gene=UCN3">https://www.genecards.org/cgi-bin/carddisp.pl?gene=UCN3</a>         |
| UCN2     | Urocortin 2                                  | Protein Coding | 32 | GC03M048561 | 1.334767 | <a href="http://www.ncbi.nlm.nih.gov/ncbi/cdd/bin/carddisp.pl?gene=UCN2">https://www.genecards.org/cgi-bin/carddisp.pl?gene=UCN2</a>         |
| MIRLET7G | MicroRNA Let-7g                              | RNA Gene       | 20 | GC03M052268 | 1.332631 | <a href="http://www.ncbi.nlm.nih.gov/ncbi/cdd/bin/carddisp.pl?gene=MIRLET7G">https://www.genecards.org/cgi-bin/carddisp.pl?gene=MIRLET7G</a> |
| TYRP1    | Tyrosinase Related Protein 1                 | Protein Coding | 45 | GC09P012683 | 1.329633 | <a href="http://www.ncbi.nlm.nih.gov/ncbi/cdd/bin/carddisp.pl?gene=TYRP1">https://www.genecards.org/cgi-bin/carddisp.pl?gene=TYRP1</a>       |
| IFNAR2   | Interferon Alpha And Beta Receptor Subunit 2 | Protein Coding | 47 | GC21P033229 | 1.329088 | <a href="http://www.ncbi.nlm.nih.gov/ncbi/cdd/bin/carddisp.pl?gene=IFNAR2">https://www.genecards.org/cgi-bin/carddisp.pl?gene=IFNAR2</a>     |



|         |                                                      |                |    |             |          |                                                                                                                                     |
|---------|------------------------------------------------------|----------------|----|-------------|----------|-------------------------------------------------------------------------------------------------------------------------------------|
| RNASET2 | Ribonuclease T2                                      | Protein Coding | 43 | GC06M166924 | 1.329088 | <a href="https://www.genecards.org/cgi-bin/carddisp.pl?gene=RNASET2">https://www.genecards.org/cgi-bin/carddisp.pl?gene=RNASET2</a> |
| DGCR8   | DGCR8 Microprocessor Complex Subunit                 | Protein Coding | 40 | GC22P020080 | 1.329088 | <a href="https://www.genecards.org/cgi-bin/carddisp.pl?gene=DGCR8">https://www.genecards.org/cgi-bin/carddisp.pl?gene=DGCR8</a>     |
| SCARF2  | Scavenger Receptor Class F Member 2                  | Protein Coding | 40 | GC22M020424 | 1.329088 | <a href="https://www.genecards.org/cgi-bin/carddisp.pl?gene=SCARF2">https://www.genecards.org/cgi-bin/carddisp.pl?gene=SCARF2</a>   |
| MED15   | Mediator Complex Subunit 15                          | Protein Coding | 39 | GC22P035865 | 1.329088 | <a href="https://www.genecards.org/cgi-bin/carddisp.pl?gene=MED15">https://www.genecards.org/cgi-bin/carddisp.pl?gene=MED15</a>     |
| PLCL1   | Phospholipase C Like 1 (Inactive)                    | Protein Coding | 38 | GC02P197804 | 1.329088 | <a href="https://www.genecards.org/cgi-bin/carddisp.pl?gene=PLCL1">https://www.genecards.org/cgi-bin/carddisp.pl?gene=PLCL1</a>     |
| TELO2   | Telomere Maintenance 2                               | Protein Coding | 38 | GC16P001493 | 1.329088 | <a href="https://www.genecards.org/cgi-bin/carddisp.pl?gene=TELO2">https://www.genecards.org/cgi-bin/carddisp.pl?gene=TELO2</a>     |
| DCTPP1  | DCTP Pyrophosphatase 1                               | Protein Coding | 35 | GC16M037170 | 1.329088 | <a href="https://www.genecards.org/cgi-bin/carddisp.pl?gene=DCTPP1">https://www.genecards.org/cgi-bin/carddisp.pl?gene=DCTPP1</a>   |
| RMDN2   | Regulator Of Microtubule Dynamics 2                  | Protein Coding | 32 | GC02P037923 | 1.329088 | <a href="https://www.genecards.org/cgi-bin/carddisp.pl?gene=RMDN2">https://www.genecards.org/cgi-bin/carddisp.pl?gene=RMDN2</a>     |
| SEPTIN5 | Septin 5                                             | Protein Coding | 29 | GC22P019714 | 1.329088 | <a href="https://www.genecards.org/cgi-bin/carddisp.pl?gene=SEPTIN5">https://www.genecards.org/cgi-bin/carddisp.pl?gene=SEPTIN5</a> |
| PHETA1  | PH Domain Containing Endocytic Trafficking Adaptor 1 | Protein Coding | 27 | GC12M111361 | 1.329088 | <a href="https://www.genecards.org/cgi-bin/carddisp.pl?gene=PHETA1">https://www.genecards.org/cgi-bin/carddisp.pl?gene=PHETA1</a>   |
| PTGES3  | Prostaglandin E Synthase 3                           | Protein Coding | 43 | GC12M056866 | 1.328492 | <a href="https://www.genecards.org/cgi-bin/carddisp.pl?gene=PTGES3">https://www.genecards.org/cgi-bin/carddisp.pl?gene=PTGES3</a>   |
| P2RX6   | Purinergic Receptor P2X 6                            | Protein Coding | 41 | GC22P035894 | 1.325502 | <a href="https://www.genecards.org/cgi-bin/carddisp.pl?gene=P2RX6">https://www.genecards.org/cgi-bin/carddisp.pl?gene=P2RX6</a>     |
| ITPR3   | Inositol 1,4,5-Trisphosphate Receptor Type 3         | Protein Coding | 44 | GC06P033620 | 1.324167 | <a href="https://www.genecards.org/cgi-bin/carddisp.pl?gene=ITPR3">https://www.genecards.org/cgi-bin/carddisp.pl?gene=ITPR3</a>     |
| AARS2   | Alanyl-TRNA Synthetase 2, Mitochondrial              | Protein Coding | 42 | GC06M066237 | 1.315896 | <a href="https://www.genecards.org/cgi-">https://www.genecards.org/cgi-</a>                                                         |

|         |                                                |                |    |              |          |                                                                                                                                            |
|---------|------------------------------------------------|----------------|----|--------------|----------|--------------------------------------------------------------------------------------------------------------------------------------------|
|         |                                                |                |    |              |          | <a href="http://www.ncbi.nlm.nih.gov/ncbi/cdd/bin/carddisp.pl?gene=AARS2">bin/carddisp.pl?gene=AARS2</a>                                   |
| POLR2B  | RNA Polymerase II Subunit B                    | Protein Coding | 42 | GC04P056977  | 1.315849 | <a href="http://www.ncbi.nlm.nih.gov/ncbi/cdd/bin/carddisp.pl?gene=POLR2B">https://www.genecards.org/cgi-bin/carddisp.pl?gene=POLR2B</a>   |
| MAGT1   | Magnesium Transporter 1                        | Protein Coding | 39 | GC0XM078008  | 1.315849 | <a href="http://www.ncbi.nlm.nih.gov/ncbi/cdd/bin/carddisp.pl?gene=MAGT1">https://www.genecards.org/cgi-bin/carddisp.pl?gene=MAGT1</a>     |
| MT-CO1  | Mitochondrially Encoded Cytochrome C Oxidase I | Protein Coding | 34 | GCMT P005906 | 1.315849 | <a href="http://www.ncbi.nlm.nih.gov/ncbi/cdd/bin/carddisp.pl?gene=MT-CO1">https://www.genecards.org/cgi-bin/carddisp.pl?gene=MT-CO1</a>   |
| CYTL1   | Cytokine Like 1                                | Protein Coding | 32 | GC04M005016  | 1.315397 | <a href="http://www.ncbi.nlm.nih.gov/ncbi/cdd/bin/carddisp.pl?gene=CYTL1">https://www.genecards.org/cgi-bin/carddisp.pl?gene=CYTL1</a>     |
| TAF3    | TATA-Box Binding Protein Associated Factor 3   | Protein Coding | 37 | GC10P007860  | 1.312455 | <a href="http://www.ncbi.nlm.nih.gov/ncbi/cdd/bin/carddisp.pl?gene=TAF3">https://www.genecards.org/cgi-bin/carddisp.pl?gene=TAF3</a>       |
| SLC6A4  | Solute Carrier Family 6 Member 4               | Protein Coding | 46 | GC17M030194  | 1.30904  | <a href="http://www.ncbi.nlm.nih.gov/ncbi/cdd/bin/carddisp.pl?gene=SLC6A4">https://www.genecards.org/cgi-bin/carddisp.pl?gene=SLC6A4</a>   |
| MLANA   | Melan-A                                        | Protein Coding | 38 | GC09P006557  | 1.30585  | <a href="http://www.ncbi.nlm.nih.gov/ncbi/cdd/bin/carddisp.pl?gene=MLANA">https://www.genecards.org/cgi-bin/carddisp.pl?gene=MLANA</a>     |
| PTS     | 6-Pyruvoyltetrahydropterin Synthase            | Protein Coding | 44 | GC11P112226  | 1.304664 | <a href="http://www.ncbi.nlm.nih.gov/ncbi/cdd/bin/carddisp.pl?gene=PTS">https://www.genecards.org/cgi-bin/carddisp.pl?gene=PTS</a>         |
| FHL1    | Four And A Half LIM Domains 1                  | Protein Coding | 44 | GC0XP136146  | 1.303164 | <a href="http://www.ncbi.nlm.nih.gov/ncbi/cdd/bin/carddisp.pl?gene=FHL1">https://www.genecards.org/cgi-bin/carddisp.pl?gene=FHL1</a>       |
| MIR663A | MicroRNA 663a                                  | RNA Gene       | 16 | GC20M026189  | 1.303164 | <a href="http://www.ncbi.nlm.nih.gov/ncbi/cdd/bin/carddisp.pl?gene=MIR663A">https://www.genecards.org/cgi-bin/carddisp.pl?gene=MIR663A</a> |
| ZEB1    | Zinc Finger E-Box Binding Homeobox 1           | Protein Coding | 46 | GC10P031318  | 1.302217 | <a href="http://www.ncbi.nlm.nih.gov/ncbi/cdd/bin/carddisp.pl?gene=ZEB1">https://www.genecards.org/cgi-bin/carddisp.pl?gene=ZEB1</a>       |
| CCKAR   | Cholecystokinin A Receptor                     | Protein Coding | 44 | GC04M026483  | 1.302217 | <a href="http://www.ncbi.nlm.nih.gov/ncbi/cdd/bin/carddisp.pl?gene=CCKAR">https://www.genecards.org/cgi-bin/carddisp.pl?gene=CCKAR</a>     |
| NR5A2   | Nuclear Receptor Subfamily 5 Group A Member 2  | Protein Coding | 44 | GC01P199996  | 1.302217 | <a href="http://www.ncbi.nlm.nih.gov/ncbi/cdd/bin/carddisp.pl?gene=NR5A2">https://www.genecards.org/cgi-bin/carddisp.pl?gene=NR5A2</a>     |

|         |                                            |                |    |             |          |                                                                                                                                     |
|---------|--------------------------------------------|----------------|----|-------------|----------|-------------------------------------------------------------------------------------------------------------------------------------|
| PRDM16  | PR/SET Domain 16                           | Protein Coding | 44 | GC01P003946 | 1.302217 | <a href="https://www.genecards.org/cgi-bin/carddisp.pl?gene=PRDM16">https://www.genecards.org/cgi-bin/carddisp.pl?gene=PRDM16</a>   |
| SATB2   | SATB Homeobox 2                            | Protein Coding | 43 | GC02M199269 | 1.302217 | <a href="https://www.genecards.org/cgi-bin/carddisp.pl?gene=SATB2">https://www.genecards.org/cgi-bin/carddisp.pl?gene=SATB2</a>     |
| NDUFS4  | NADH:Ubiquinone Oxidoreductase Subunit S4  | Protein Coding | 42 | GC05P053560 | 1.302217 | <a href="https://www.genecards.org/cgi-bin/carddisp.pl?gene=NDUFS4">https://www.genecards.org/cgi-bin/carddisp.pl?gene=NDUFS4</a>   |
| YIPF3   | Yip1 Domain Family Member 3                | Protein Coding | 35 | GC06M066209 | 1.302217 | <a href="https://www.genecards.org/cgi-bin/carddisp.pl?gene=YIPF3">https://www.genecards.org/cgi-bin/carddisp.pl?gene=YIPF3</a>     |
| CCDC154 | Coiled-Coil Domain Containing 154          | Protein Coding | 29 | GC16M001434 | 1.302217 | <a href="https://www.genecards.org/cgi-bin/carddisp.pl?gene=CCDC154">https://www.genecards.org/cgi-bin/carddisp.pl?gene=CCDC154</a> |
| PSMD9   | Proteasome 26S Subunit, Non-ATPase 9       | Protein Coding | 41 | GC12P126233 | 1.302004 | <a href="https://www.genecards.org/cgi-bin/carddisp.pl?gene=PSMD9">https://www.genecards.org/cgi-bin/carddisp.pl?gene=PSMD9</a>     |
| SH3TC2  | SH3 Domain And Tetratricopeptide Repeats 2 | Protein Coding | 37 | GC05M148923 | 1.302004 | <a href="https://www.genecards.org/cgi-bin/carddisp.pl?gene=SH3TC2">https://www.genecards.org/cgi-bin/carddisp.pl?gene=SH3TC2</a>   |
| HRG     | Histidine Rich Glycoprotein                | Protein Coding | 45 | GC03P186660 | 1.300443 | <a href="https://www.genecards.org/cgi-bin/carddisp.pl?gene=HRG">https://www.genecards.org/cgi-bin/carddisp.pl?gene=HRG</a>         |
| ADCY10  | Adenylate Cyclase 10                       | Protein Coding | 43 | GC01M167809 | 1.299235 | <a href="https://www.genecards.org/cgi-bin/carddisp.pl?gene=ADCY10">https://www.genecards.org/cgi-bin/carddisp.pl?gene=ADCY10</a>   |
| ARRB1   | Arrestin Beta 1                            | Protein Coding | 42 | GC11M090410 | 1.290536 | <a href="https://www.genecards.org/cgi-bin/carddisp.pl?gene=ARRB1">https://www.genecards.org/cgi-bin/carddisp.pl?gene=ARRB1</a>     |
| CD177   | CD177 Molecule                             | Protein Coding | 38 | GC19P043353 | 1.286208 | <a href="https://www.genecards.org/cgi-bin/carddisp.pl?gene=CD177">https://www.genecards.org/cgi-bin/carddisp.pl?gene=CD177</a>     |
| MAVS    | Mitochondrial Antiviral Signaling Protein  | Protein Coding | 37 | GC20P004265 | 1.279931 | <a href="https://www.genecards.org/cgi-bin/carddisp.pl?gene=MAVS">https://www.genecards.org/cgi-bin/carddisp.pl?gene=MAVS</a>       |
| ZNF365  | Zinc Finger Protein 365                    | Protein Coding | 38 | GC10P062374 | 1.277035 | <a href="https://www.genecards.org/cgi-bin/carddisp.pl?gene=ZNF365">https://www.genecards.org/cgi-bin/carddisp.pl?gene=ZNF365</a>   |
| IRF6    | Interferon Regulatory Factor 6             | Protein Coding | 42 | GC01M209785 | 1.276064 | <a href="https://www.genecards.org/cgi-">https://www.genecards.org/cgi-</a>                                                         |

|         |                                                          |                |    |             |          |                                                                                                                                     |
|---------|----------------------------------------------------------|----------------|----|-------------|----------|-------------------------------------------------------------------------------------------------------------------------------------|
|         |                                                          |                |    |             |          | bin/carddisp.pl?gene=IRF6                                                                                                           |
| SNAI1   | Snail Family Transcriptional Repressor 1                 | Protein Coding | 42 | GC20P049982 | 1.275204 | <a href="https://www.genecards.org/cgi-bin/carddisp.pl?gene=SNAI1">https://www.genecards.org/cgi-bin/carddisp.pl?gene=SNAI1</a>     |
| PTBP1   | Polypyrimidine Tract Binding Protein 1                   | Protein Coding | 41 | GC19P000797 | 1.27503  | <a href="https://www.genecards.org/cgi-bin/carddisp.pl?gene=PTBP1">https://www.genecards.org/cgi-bin/carddisp.pl?gene=PTBP1</a>     |
| CARD16  | Caspase Recruitment Domain Family Member 16              | Protein Coding | 35 | GC11M105041 | 1.268728 | <a href="https://www.genecards.org/cgi-bin/carddisp.pl?gene=CARD16">https://www.genecards.org/cgi-bin/carddisp.pl?gene=CARD16</a>   |
| VKORC1  | Vitamin K Epoxide Reductase Complex Subunit 1            | Protein Coding | 46 | GC16M037224 | 1.26575  | <a href="https://www.genecards.org/cgi-bin/carddisp.pl?gene=VKORC1">https://www.genecards.org/cgi-bin/carddisp.pl?gene=VKORC1</a>   |
| TSPAN8  | Tetraspanin 8                                            | Protein Coding | 38 | GC12M071125 | 1.264643 | <a href="https://www.genecards.org/cgi-bin/carddisp.pl?gene=TSPAN8">https://www.genecards.org/cgi-bin/carddisp.pl?gene=TSPAN8</a>   |
| RPS27A  | Ribosomal Protein S27a                                   | Protein Coding | 41 | GC02P055231 | 1.264195 | <a href="https://www.genecards.org/cgi-bin/carddisp.pl?gene=RPS27A">https://www.genecards.org/cgi-bin/carddisp.pl?gene=RPS27A</a>   |
| PAK1    | P21 (RAC1) Activated Kinase 1                            | Protein Coding | 46 | GC11M090480 | 1.263135 | <a href="https://www.genecards.org/cgi-bin/carddisp.pl?gene=PAK1">https://www.genecards.org/cgi-bin/carddisp.pl?gene=PAK1</a>       |
| MIR379  | MicroRNA 379                                             | RNA Gene       | 17 | GC14P109984 | 1.25984  | <a href="https://www.genecards.org/cgi-bin/carddisp.pl?gene=MIR379">https://www.genecards.org/cgi-bin/carddisp.pl?gene=MIR379</a>   |
| ALOX12  | Arachidonate 12-Lipoxygenase, 12S Type                   | Protein Coding | 43 | GC17P006995 | 1.259021 | <a href="https://www.genecards.org/cgi-bin/carddisp.pl?gene=ALOX12">https://www.genecards.org/cgi-bin/carddisp.pl?gene=ALOX12</a>   |
| AZU1    | Azurocidin 1                                             | Protein Coding | 39 | GC19P000825 | 1.255604 | <a href="https://www.genecards.org/cgi-bin/carddisp.pl?gene=AZU1">https://www.genecards.org/cgi-bin/carddisp.pl?gene=AZU1</a>       |
| DOCK8   | Dedicator Of Cytokinesis 8                               | Protein Coding | 43 | GC09P000214 | 1.251442 | <a href="https://www.genecards.org/cgi-bin/carddisp.pl?gene=DOCK8">https://www.genecards.org/cgi-bin/carddisp.pl?gene=DOCK8</a>     |
| HMGCR   | 3-Hydroxy-3-Methylglutaryl-CoA Reductase                 | Protein Coding | 45 | GC05P075336 | 1.250626 | <a href="https://www.genecards.org/cgi-bin/carddisp.pl?gene=HMGCR">https://www.genecards.org/cgi-bin/carddisp.pl?gene=HMGCR</a>     |
| ADAMTS1 | ADAM Metallopeptidase With Thrombospondin Type 1 Motif 1 | Protein Coding | 44 | GC21M026835 | 1.250154 | <a href="https://www.genecards.org/cgi-bin/carddisp.pl?gene=ADAMTS1">https://www.genecards.org/cgi-bin/carddisp.pl?gene=ADAMTS1</a> |

|           |                                                  |                |    |             |          |                                                                                                                                         |
|-----------|--------------------------------------------------|----------------|----|-------------|----------|-----------------------------------------------------------------------------------------------------------------------------------------|
| SACS      | Sacsin Molecular Chaperone                       | Protein Coding | 37 | GC13M023288 | 1.249107 | <a href="https://www.genecards.org/cgi-bin/carddisp.pl?gene=SACS">https://www.genecards.org/cgi-bin/carddisp.pl?gene=SACS</a>           |
| MSX1      | Msh Homeobox 1                                   | Protein Coding | 44 | GC04P004861 | 1.248302 | <a href="https://www.genecards.org/cgi-bin/carddisp.pl?gene=MSX1">https://www.genecards.org/cgi-bin/carddisp.pl?gene=MSX1</a>           |
| MIR197    | MicroRNA 197                                     | RNA Gene       | 20 | GC01P109549 | 1.240171 | <a href="https://www.genecards.org/cgi-bin/carddisp.pl?gene=MIR197">https://www.genecards.org/cgi-bin/carddisp.pl?gene=MIR197</a>       |
| NUP160    | Nucleoporin 160                                  | Protein Coding | 39 | GC11M089379 | 1.235978 | <a href="https://www.genecards.org/cgi-bin/carddisp.pl?gene=NUP160">https://www.genecards.org/cgi-bin/carddisp.pl?gene=NUP160</a>       |
| PTPN1     | Protein Tyrosine Phosphatase Non-Receptor Type 1 | Protein Coding | 48 | GC20P050510 | 1.233077 | <a href="https://www.genecards.org/cgi-bin/carddisp.pl?gene=PTPN1">https://www.genecards.org/cgi-bin/carddisp.pl?gene=PTPN1</a>         |
| NARS1     | Asparaginyl-TRNA Synthetase 1                    | Protein Coding | 34 | GC18M057601 | 1.230197 | <a href="https://www.genecards.org/cgi-bin/carddisp.pl?gene=NARS1">https://www.genecards.org/cgi-bin/carddisp.pl?gene=NARS1</a>         |
| SLC9A3R1  | SLC9A3 Regulator 1                               | Protein Coding | 44 | GC17P074749 | 1.225507 | <a href="https://www.genecards.org/cgi-bin/carddisp.pl?gene=SLC9A3R1">https://www.genecards.org/cgi-bin/carddisp.pl?gene=SLC9A3R1</a>   |
| PMP22     | Peripheral Myelin Protein 22                     | Protein Coding | 41 | GC17M015229 | 1.222336 | <a href="https://www.genecards.org/cgi-bin/carddisp.pl?gene=PMP22">https://www.genecards.org/cgi-bin/carddisp.pl?gene=PMP22</a>         |
| CD200R1L  | CD200 Receptor 1 Like                            | Protein Coding | 29 | GC03M112815 | 1.219312 | <a href="https://www.genecards.org/cgi-bin/carddisp.pl?gene=CD200R1L">https://www.genecards.org/cgi-bin/carddisp.pl?gene=CD200R1L</a>   |
| LINC01996 | Long Intergenic Non-Protein Coding RNA 1996      | RNA Gene       | 10 | GC17P004611 | 1.219312 | <a href="https://www.genecards.org/cgi-bin/carddisp.pl?gene=LINC01996">https://www.genecards.org/cgi-bin/carddisp.pl?gene=LINC01996</a> |
| C17orf114 | Chromosome 17 Open Reading Frame 114             | Protein Coding | 9  | GC17M004806 | 1.219312 | <a href="https://www.genecards.org/cgi-bin/carddisp.pl?gene=C17orf114">https://www.genecards.org/cgi-bin/carddisp.pl?gene=C17orf114</a> |
| RGS1      | Regulator Of G Protein Signaling 1               | Protein Coding | 37 | GC01P192575 | 1.210462 | <a href="https://www.genecards.org/cgi-bin/carddisp.pl?gene=RGS1">https://www.genecards.org/cgi-bin/carddisp.pl?gene=RGS1</a>           |
| UCP2      | Uncoupling Protein 2                             | Protein Coding | 44 | GC11M073974 | 1.210295 | <a href="https://www.genecards.org/cgi-bin/carddisp.pl?gene=UCP2">https://www.genecards.org/cgi-bin/carddisp.pl?gene=UCP2</a>           |
| PEBP1     | Phosphatidylethanolamine Binding Protein 1       | Protein Coding | 43 | GC12P118135 | 1.209291 | <a href="https://www.genecards.org/cgi-">https://www.genecards.org/cgi-</a>                                                             |

|        |                                              |                |    |             |          |                                                                                                                                          |
|--------|----------------------------------------------|----------------|----|-------------|----------|------------------------------------------------------------------------------------------------------------------------------------------|
|        |                                              |                |    |             |          | <a href="http://www.ncbi.nlm.nih.gov/ncbi/cdd/bin/carddisp.pl?gene=PEBP1">bin/carddisp.pl?gene=PEBP1</a>                                 |
| PTPRJ  | Protein Tyrosine Phosphatase Receptor Type J | Protein Coding | 46 | GC11P048002 | 1.209265 | <a href="http://www.ncbi.nlm.nih.gov/ncbi/cdd/bin/carddisp.pl?gene=PTPRJ">https://www.genecards.org/cgi-bin/carddisp.pl?gene=PTPRJ</a>   |
| PRKCZ  | Protein Kinase C Zeta                        | Protein Coding | 47 | GC01P003912 | 1.208204 | <a href="http://www.ncbi.nlm.nih.gov/ncbi/cdd/bin/carddisp.pl?gene=PRKCZ">https://www.genecards.org/cgi-bin/carddisp.pl?gene=PRKCZ</a>   |
| CTTN   | Cortactin                                    | Protein Coding | 41 | GC11P070398 | 1.207488 | <a href="http://www.ncbi.nlm.nih.gov/ncbi/cdd/bin/carddisp.pl?gene=CTTN">https://www.genecards.org/cgi-bin/carddisp.pl?gene=CTTN</a>     |
| LCP2   | Lymphocyte Cytosolic Protein 2               | Protein Coding | 41 | GC05M170246 | 1.207488 | <a href="http://www.ncbi.nlm.nih.gov/ncbi/cdd/bin/carddisp.pl?gene=LCP2">https://www.genecards.org/cgi-bin/carddisp.pl?gene=LCP2</a>     |
| AMT    | Aminomethyltransferase                       | Protein Coding | 44 | GC03M051187 | 1.206704 | <a href="http://www.ncbi.nlm.nih.gov/ncbi/cdd/bin/carddisp.pl?gene=AMT">https://www.genecards.org/cgi-bin/carddisp.pl?gene=AMT</a>       |
| PPIF   | Peptidylprolyl Isomerase F                   | Protein Coding | 43 | GC10P092351 | 1.206704 | <a href="http://www.ncbi.nlm.nih.gov/ncbi/cdd/bin/carddisp.pl?gene=PPIF">https://www.genecards.org/cgi-bin/carddisp.pl?gene=PPIF</a>     |
| PEX13  | Peroxisomal Biogenesis Factor 13             | Protein Coding | 40 | GC02P061017 | 1.206704 | <a href="http://www.ncbi.nlm.nih.gov/ncbi/cdd/bin/carddisp.pl?gene=PEX13">https://www.genecards.org/cgi-bin/carddisp.pl?gene=PEX13</a>   |
| REV1   | REV1 DNA Directed Polymerase                 | Protein Coding | 40 | GC02M099383 | 1.206704 | <a href="http://www.ncbi.nlm.nih.gov/ncbi/cdd/bin/carddisp.pl?gene=REV1">https://www.genecards.org/cgi-bin/carddisp.pl?gene=REV1</a>     |
| DHX16  | DEAH-Box Helicase 16                         | Protein Coding | 39 | GC06M030653 | 1.206704 | <a href="http://www.ncbi.nlm.nih.gov/ncbi/cdd/bin/carddisp.pl?gene=DHX16">https://www.genecards.org/cgi-bin/carddisp.pl?gene=DHX16</a>   |
| GTF2H4 | General Transcription Factor IIH Subunit 4   | Protein Coding | 39 | GC06P083679 | 1.206704 | <a href="http://www.ncbi.nlm.nih.gov/ncbi/cdd/bin/carddisp.pl?gene=GTF2H4">https://www.genecards.org/cgi-bin/carddisp.pl?gene=GTF2H4</a> |
| LIMD1  | LIM Domain Containing 1                      | Protein Coding | 38 | GC03P045555 | 1.206704 | <a href="http://www.ncbi.nlm.nih.gov/ncbi/cdd/bin/carddisp.pl?gene=LIMD1">https://www.genecards.org/cgi-bin/carddisp.pl?gene=LIMD1</a>   |
| PAPOLG | Poly(A) Polymerase Gamma                     | Protein Coding | 38 | GC02P060756 | 1.206704 | <a href="http://www.ncbi.nlm.nih.gov/ncbi/cdd/bin/carddisp.pl?gene=PAPOLG">https://www.genecards.org/cgi-bin/carddisp.pl?gene=PAPOLG</a> |
| RASSF5 | Ras Association Domain Family Member 5       | Protein Coding | 38 | GC01P206507 | 1.206704 | <a href="http://www.ncbi.nlm.nih.gov/ncbi/cdd/bin/carddisp.pl?gene=RASSF5">https://www.genecards.org/cgi-bin/carddisp.pl?gene=RASSF5</a> |

|          |                                                 |                |    |             |          |                                                                                                                                   |
|----------|-------------------------------------------------|----------------|----|-------------|----------|-----------------------------------------------------------------------------------------------------------------------------------|
| CARD6    | Caspase Recruitment Domain Family Member 6      | Protein Coding | 37 | GC05P040841 | 1.206704 | <a href="https://www.genecards.org/cgi-bin/carddisp.pl?gene=CARD6">https://www.genecards.org/cgi-bin/carddisp.pl?gene=CARD6</a>   |
| PSMG1    | Proteasome Assembly Chaperone 1                 | Protein Coding | 37 | GC21M039174 | 1.206704 | <a href="https://www.genecards.org/cgi-bin/carddisp.pl?gene=PSMG1">https://www.genecards.org/cgi-bin/carddisp.pl?gene=PSMG1</a>   |
| TCF19    | Transcription Factor 19                         | Protein Coding | 37 | GC06P083684 | 1.206704 | <a href="https://www.genecards.org/cgi-bin/carddisp.pl?gene=TCF19">https://www.genecards.org/cgi-bin/carddisp.pl?gene=TCF19</a>   |
| IKZF4    | IKAROS Family Zinc Finger 4                     | Protein Coding | 36 | GC12P056007 | 1.206704 | <a href="https://www.genecards.org/cgi-bin/carddisp.pl?gene=IKZF4">https://www.genecards.org/cgi-bin/carddisp.pl?gene=IKZF4</a>   |
| NRBF2    | Nuclear Receptor Binding Factor 2               | Protein Coding | 36 | GC10P063133 | 1.206704 | <a href="https://www.genecards.org/cgi-bin/carddisp.pl?gene=NRBF2">https://www.genecards.org/cgi-bin/carddisp.pl?gene=NRBF2</a>   |
| SH3BP1   | SH3 Domain Binding Protein 1                    | Protein Coding | 36 | GC22P037634 | 1.206704 | <a href="https://www.genecards.org/cgi-bin/carddisp.pl?gene=SH3BP1">https://www.genecards.org/cgi-bin/carddisp.pl?gene=SH3BP1</a> |
| LRRC2    | Leucine Rich Repeat Containing 2                | Protein Coding | 35 | GC03M046515 | 1.206704 | <a href="https://www.genecards.org/cgi-bin/carddisp.pl?gene=LRRC2">https://www.genecards.org/cgi-bin/carddisp.pl?gene=LRRC2</a>   |
| PUS10    | Pseudouridine Synthase 10                       | Protein Coding | 35 | GC02M060940 | 1.206704 | <a href="https://www.genecards.org/cgi-bin/carddisp.pl?gene=PUS10">https://www.genecards.org/cgi-bin/carddisp.pl?gene=PUS10</a>   |
| ZBTB7C   | Zinc Finger And BTB Domain Containing 7C        | Protein Coding | 33 | GC18M048026 | 1.206704 | <a href="https://www.genecards.org/cgi-bin/carddisp.pl?gene=ZBTB7C">https://www.genecards.org/cgi-bin/carddisp.pl?gene=ZBTB7C</a> |
| TTC33    | Tetratricopeptide Repeat Domain 33              | Protein Coding | 32 | GC05M040512 | 1.206704 | <a href="https://www.genecards.org/cgi-bin/carddisp.pl?gene=TTC33">https://www.genecards.org/cgi-bin/carddisp.pl?gene=TTC33</a>   |
| INKA1    | InkA Box Actin Regulator 1                      | Protein Coding | 24 | GC03P049803 | 1.206704 | <a href="https://www.genecards.org/cgi-bin/carddisp.pl?gene=INKA1">https://www.genecards.org/cgi-bin/carddisp.pl?gene=INKA1</a>   |
| AHSA2P   | Activator Of HSP90 ATPase Homolog 2, Pseudogene | Pseudo gene    | 22 | GC02P061179 | 1.206704 | <a href="https://www.genecards.org/cgi-bin/carddisp.pl?gene=AHSA2P">https://www.genecards.org/cgi-bin/carddisp.pl?gene=AHSA2P</a> |
| CCR5AS   | CCR5 Antisense RNA                              | RNA Gene       | 12 | GC03M046365 | 1.206704 | <a href="https://www.genecards.org/cgi-bin/carddisp.pl?gene=CCR5AS">https://www.genecards.org/cgi-bin/carddisp.pl?gene=CCR5AS</a> |
| IL6ST-DT | IL6ST Divergent Transcript                      | RNA Gene       | 12 | GC05P055996 | 1.206704 | <a href="https://www.genecards.org/cgi-">https://www.genecards.org/cgi-</a>                                                       |

|                 |                                                         |             |    |             |          |                                                                                                                                                     |
|-----------------|---------------------------------------------------------|-------------|----|-------------|----------|-----------------------------------------------------------------------------------------------------------------------------------------------------|
|                 |                                                         |             |    |             |          | <a href="#">bin/carddisp.pl?gene=IL6ST-DT</a>                                                                                                       |
| NONOP2          | Non-POU Domain Containing, Octamer-Binding Pseudogene 2 | Pseudo gene | 10 | GC02M060937 | 1.206704 | <a href="https://www.genecards.org/cgi-bin/carddisp.pl?gene=NONOP2">https://www.genecards.org/cgi-bin/carddisp.pl?gene=NONOP2</a>                   |
| USP34-DT        | USP34 Divergent Transcript                              | RNA Gene    | 10 | GC02P061473 | 1.206704 | <a href="https://www.genecards.org/cgi-bin/carddisp.pl?gene=USP34-DT">https://www.genecards.org/cgi-bin/carddisp.pl?gene=USP34-DT</a>               |
| ALDH7A1P4       | Aldehyde Dehydrogenase 7 Family Member A1 Pseudogene 4  | Pseudo gene | 9  | GC10M062740 | 1.206704 | <a href="https://www.genecards.org/cgi-bin/carddisp.pl?gene=ALDH7A1P4">https://www.genecards.org/cgi-bin/carddisp.pl?gene=ALDH7A1P4</a>             |
| ENSG00000235888 | Novel Transcript                                        | RNA Gene    | 9  | GC21M038988 | 1.206704 | <a href="https://www.genecards.org/cgi-bin/carddisp.pl?gene=ENSG00000235888">https://www.genecards.org/cgi-bin/carddisp.pl?gene=ENSG00000235888</a> |
| RPS12P3         | Ribosomal Protein S12 Pseudogene 3                      | Pseudo gene | 9  | GC02M060938 | 1.206704 | <a href="https://www.genecards.org/cgi-bin/carddisp.pl?gene=RPS12P3">https://www.genecards.org/cgi-bin/carddisp.pl?gene=RPS12P3</a>                 |
| RPS15AP38       | Ribosomal Protein S15a Pseudogene 38                    | Pseudo gene | 9  | GC22M036421 | 1.206704 | <a href="https://www.genecards.org/cgi-bin/carddisp.pl?gene=RPS15AP38">https://www.genecards.org/cgi-bin/carddisp.pl?gene=RPS15AP38</a>             |
| ENSG00000199332 | Y RNA                                                   | RNA Gene    | 8  | GC06M065930 | 1.206704 | <a href="https://www.genecards.org/cgi-bin/carddisp.pl?gene=ENSG00000199332">https://www.genecards.org/cgi-bin/carddisp.pl?gene=ENSG00000199332</a> |
| ENSG00000267520 | Novel Transcript                                        | RNA Gene    | 8  | GC02P060925 | 1.206704 | <a href="https://www.genecards.org/cgi-bin/carddisp.pl?gene=ENSG00000267520">https://www.genecards.org/cgi-bin/carddisp.pl?gene=ENSG00000267520</a> |
| ENSG00000272221 | Novel Transcript                                        | RNA Gene    | 8  | GC06M065927 | 1.206704 | <a href="https://www.genecards.org/cgi-bin/carddisp.pl?gene=ENSG00000272221">https://www.genecards.org/cgi-bin/carddisp.pl?gene=ENSG00000272221</a> |
| LOC124901197    | Small Nucleolar RNA U13                                 | RNA Gene    | 8  | GC05M056001 | 1.206704 | <a href="https://www.genecards.org/cgi-bin/carddisp.pl?gene=LOC124901197">https://www.genecards.org/cgi-bin/carddisp.pl?gene=LOC124901197</a>       |
| RN7SL51P        | RNA, 7SL, Cytoplasmic 51, Pseudogene                    | Pseudo gene | 8  | GC02M062262 | 1.206704 | <a href="https://www.genecards.org/cgi-bin/carddisp.pl?gene=RN7SL51P">https://www.genecards.org/cgi-bin/carddisp.pl?gene=RN7SL51P</a>               |
| RNA5SP184       | RNA, 5S Ribosomal Pseudogene 184                        | Pseudo gene | 8  | GC05M056146 | 1.206704 | <a href="https://www.genecards.org/cgi-bin/carddisp.pl?gene=RNA5SP184">https://www.genecards.org/cgi-bin/carddisp.pl?gene=RNA5SP184</a>             |
| RNU6-299P       | RNA, U6 Small Nuclear 299, Pseudogene                   | Pseudo gene | 8  | GC05P056125 | 1.206704 | <a href="https://www.genecards.org/cgi-bin/carddisp.pl?gene=RNU6-299P">https://www.genecards.org/cgi-bin/carddisp.pl?gene=RNU6-299P</a>             |



|                 |                                                                                      |             |   |             |          |                                                                                                                                                     |
|-----------------|--------------------------------------------------------------------------------------|-------------|---|-------------|----------|-----------------------------------------------------------------------------------------------------------------------------------------------------|
| RNU6-850P       | RNA, U6 Small Nuclear 850, Pseudogene                                                | Pseudo gene | 8 | GC06M031756 | 1.206704 | <a href="https://www.genecards.org/cgi-bin/carddisp.pl?gene=RNU6-850P">https://www.genecards.org/cgi-bin/carddisp.pl?gene=RNU6-850P</a>             |
| RPL23AP12       | Ribosomal Protein L23a Pseudogene 12                                                 | Pseudo gene | 8 | GC21P039127 | 1.206704 | <a href="https://www.genecards.org/cgi-bin/carddisp.pl?gene=RPL23AP12">https://www.genecards.org/cgi-bin/carddisp.pl?gene=RPL23AP12</a>             |
| AIMP1P2         | Aminoacyl TRNA Synthetase Complex Interacting Multifunctional Protein 1 Pseudogene 2 | Pseudo gene | 7 | GC01M172856 | 1.206704 | <a href="https://www.genecards.org/cgi-bin/carddisp.pl?gene=AIMP1P2">https://www.genecards.org/cgi-bin/carddisp.pl?gene=AIMP1P2</a>                 |
| HNRNPA1P41      | Heterogeneous Nuclear Ribonucleoprotein A1 Pseudogene 41                             | Pseudo gene | 6 | GC09M004946 | 1.206704 | <a href="https://www.genecards.org/cgi-bin/carddisp.pl?gene=HNRNPA1P41">https://www.genecards.org/cgi-bin/carddisp.pl?gene=HNRNPA1P41</a>           |
| ENSG00000285552 | Novel Transcript                                                                     | RNA Gene    | 5 | GC05P040463 | 1.206704 | <a href="https://www.genecards.org/cgi-bin/carddisp.pl?gene=ENSG00000285552">https://www.genecards.org/cgi-bin/carddisp.pl?gene=ENSG00000285552</a> |
| ENSG00000285616 | Novel Transcript                                                                     | RNA Gene    | 5 | GC05M040474 | 1.206704 | <a href="https://www.genecards.org/cgi-bin/carddisp.pl?gene=ENSG00000285616">https://www.genecards.org/cgi-bin/carddisp.pl?gene=ENSG00000285616</a> |
| MG828730-053    |                                                                                      | RNA Gene    | 5 | GC06M067894 | 1.206704 | <a href="https://www.genecards.org/cgi-bin/carddisp.pl?gene=MG828730-053">https://www.genecards.org/cgi-bin/carddisp.pl?gene=MG828730-053</a>       |
| NONHSAG034948.2 |                                                                                      | RNA Gene    | 5 | GC03P046242 | 1.206704 | <a href="https://www.genecards.org/cgi-bin/carddisp.pl?gene=NONHSAG034948.2">https://www.genecards.org/cgi-bin/carddisp.pl?gene=NONHSAG034948.2</a> |
| RF00017-4256    |                                                                                      | RNA Gene    | 5 | GC05P055987 | 1.206704 | <a href="https://www.genecards.org/cgi-bin/carddisp.pl?gene=RF00017-4256">https://www.genecards.org/cgi-bin/carddisp.pl?gene=RF00017-4256</a>       |
| RF00017-5028    |                                                                                      | RNA Gene    | 5 | GC06M068702 | 1.206704 | <a href="https://www.genecards.org/cgi-bin/carddisp.pl?gene=RF00017-5028">https://www.genecards.org/cgi-bin/carddisp.pl?gene=RF00017-5028</a>       |
| lnc-AFF3-1      |                                                                                      | RNA Gene    | 5 | GC02M100109 | 1.206704 | <a href="https://www.genecards.org/cgi-bin/carddisp.pl?gene=lnc-AFF3-1">https://www.genecards.org/cgi-bin/carddisp.pl?gene=lnc-AFF3-1</a>           |
| lnc-IL31RA-5    |                                                                                      | RNA Gene    | 5 | GC05P056122 | 1.206704 | <a href="https://www.genecards.org/cgi-bin/carddisp.pl?gene=lnc-IL31RA-5">https://www.genecards.org/cgi-bin/carddisp.pl?gene=lnc-IL31RA-5</a>       |
| lnc-IL6ST-2     |                                                                                      | RNA Gene    | 5 | GC05M056111 | 1.206704 | <a href="https://www.genecards.org/cgi-bin/carddisp.pl?gene=lnc-IL6ST-2">https://www.genecards.org/cgi-bin/carddisp.pl?gene=lnc-IL6ST-2</a>         |

|               |          |   |             |          |                                                                                                                                                 |
|---------------|----------|---|-------------|----------|-------------------------------------------------------------------------------------------------------------------------------------------------|
| lnc-RAB5B-2   | RNA Gene | 5 | GC12P055998 | 1.206704 | <a href="https://www.genecards.org/cgi-bin/carddisp.pl?gene=lnc-RAB5B-2">https://www.genecards.org/cgi-bin/carddisp.pl?gene=lnc-RAB5B-2</a>     |
| lnc-ZCCHC24-7 | RNA Gene | 5 | GC10M079298 | 1.206704 | <a href="https://www.genecards.org/cgi-bin/carddisp.pl?gene=lnc-ZCCHC24-7">https://www.genecards.org/cgi-bin/carddisp.pl?gene=lnc-ZCCHC24-7</a> |
| HSALNG0015261 | RNA Gene | 4 | GC02M060924 | 1.206704 | <a href="https://www.genecards.org/cgi-bin/carddisp.pl?gene=HSALNG0015261">https://www.genecards.org/cgi-bin/carddisp.pl?gene=HSALNG0015261</a> |
| HSALNG0017286 | RNA Gene | 4 | GC02P100109 | 1.206704 | <a href="https://www.genecards.org/cgi-bin/carddisp.pl?gene=HSALNG0017286">https://www.genecards.org/cgi-bin/carddisp.pl?gene=HSALNG0017286</a> |
| HSALNG0069758 | RNA Gene | 4 | GC09M004978 | 1.206704 | <a href="https://www.genecards.org/cgi-bin/carddisp.pl?gene=HSALNG0069758">https://www.genecards.org/cgi-bin/carddisp.pl?gene=HSALNG0069758</a> |
| HSALNG0079128 | RNA Gene | 4 | GC10P092600 | 1.206704 | <a href="https://www.genecards.org/cgi-bin/carddisp.pl?gene=HSALNG0079128">https://www.genecards.org/cgi-bin/carddisp.pl?gene=HSALNG0079128</a> |
| HSALNG0091478 | RNA Gene | 4 | GC12P056006 | 1.206704 | <a href="https://www.genecards.org/cgi-bin/carddisp.pl?gene=HSALNG0091478">https://www.genecards.org/cgi-bin/carddisp.pl?gene=HSALNG0091478</a> |
| HSALNG0133104 | RNA Gene | 4 | GC21M039035 | 1.206704 | <a href="https://www.genecards.org/cgi-bin/carddisp.pl?gene=HSALNG0133104">https://www.genecards.org/cgi-bin/carddisp.pl?gene=HSALNG0133104</a> |
| MK280144-361  | RNA Gene | 4 | GC02P100121 | 1.206704 | <a href="https://www.genecards.org/cgi-bin/carddisp.pl?gene=MK280144-361">https://www.genecards.org/cgi-bin/carddisp.pl?gene=MK280144-361</a>   |
| MN309188      | RNA Gene | 4 | GC10M079292 | 1.206704 | <a href="https://www.genecards.org/cgi-bin/carddisp.pl?gene=MN309188">https://www.genecards.org/cgi-bin/carddisp.pl?gene=MN309188</a>           |
| RF00001-253   | RNA Gene | 4 | GC05M056283 | 1.206704 | <a href="https://www.genecards.org/cgi-bin/carddisp.pl?gene=RF00001-253">https://www.genecards.org/cgi-bin/carddisp.pl?gene=RF00001-253</a>     |
| RF00017-3020  | RNA Gene | 4 | GC02M099997 | 1.206704 | <a href="https://www.genecards.org/cgi-bin/carddisp.pl?gene=RF00017-3020">https://www.genecards.org/cgi-bin/carddisp.pl?gene=RF00017-3020</a>   |
| RF00017-3680  | RNA Gene | 4 | GC03P049643 | 1.206704 | <a href="https://www.genecards.org/cgi-bin/carddisp.pl?gene=RF00017-3680">https://www.genecards.org/cgi-bin/carddisp.pl?gene=RF00017-3680</a>   |
| RF00017-4260  | RNA Gene | 4 | GC05P056157 | 1.206704 | <a href="https://www.genecards.org/cgi-bin/carddisp.pl?gene=RF00017-4260">https://www.genecards.org/cgi-bin/carddisp.pl?gene=RF00017-4260</a>   |

|               |                                                    |                |    |             |          |                                                                                                                                                 |
|---------------|----------------------------------------------------|----------------|----|-------------|----------|-------------------------------------------------------------------------------------------------------------------------------------------------|
|               |                                                    |                |    |             |          | bin/carddisp.pl?gene=RF00017-4260                                                                                                               |
| Inc-TTC33-6   |                                                    | RNA Gene       | 4  | GC05M040484 | 1.206704 | <a href="https://www.genecards.org/cgi-bin/carddisp.pl?gene=Inc-TTC33-6">https://www.genecards.org/cgi-bin/carddisp.pl?gene=Inc-TTC33-6</a>     |
| piR-43099-059 |                                                    | RNA Gene       | 4  | GC10M079279 | 1.206704 | <a href="https://www.genecards.org/cgi-bin/carddisp.pl?gene=piR-43099-059">https://www.genecards.org/cgi-bin/carddisp.pl?gene=piR-43099-059</a> |
| piR-58297-114 |                                                    | RNA Gene       | 4  | GC12M055999 | 1.206704 | <a href="https://www.genecards.org/cgi-bin/carddisp.pl?gene=piR-58297-114">https://www.genecards.org/cgi-bin/carddisp.pl?gene=piR-58297-114</a> |
| piR-58029-003 |                                                    | RNA Gene       | 3  | GC02M060941 | 1.206704 | <a href="https://www.genecards.org/cgi-bin/carddisp.pl?gene=piR-58029-003">https://www.genecards.org/cgi-bin/carddisp.pl?gene=piR-58029-003</a> |
| RARS1         | Arginyl-TRNA Synthetase 1                          | Protein Coding | 35 | GC05P168487 | 1.20346  | <a href="https://www.genecards.org/cgi-bin/carddisp.pl?gene=RARS1">https://www.genecards.org/cgi-bin/carddisp.pl?gene=RARS1</a>                 |
| C2            | Complement C2                                      | Protein Coding | 46 | GC06P031897 | 1.202754 | <a href="https://www.genecards.org/cgi-bin/carddisp.pl?gene=C2">https://www.genecards.org/cgi-bin/carddisp.pl?gene=C2</a>                       |
| NR4A1         | Nuclear Receptor Subfamily 4 Group A Member 1      | Protein Coding | 45 | GC12P052022 | 1.199172 | <a href="https://www.genecards.org/cgi-bin/carddisp.pl?gene=NR4A1">https://www.genecards.org/cgi-bin/carddisp.pl?gene=NR4A1</a>                 |
| STAT2         | Signal Transducer And Activator Of Transcription 2 | Protein Coding | 45 | GC12M056341 | 1.196838 | <a href="https://www.genecards.org/cgi-bin/carddisp.pl?gene=STAT2">https://www.genecards.org/cgi-bin/carddisp.pl?gene=STAT2</a>                 |
| NPHS2         | NPHS2 Stomatin Family Member, Podocin              | Protein Coding | 41 | GC01M179519 | 1.196341 | <a href="https://www.genecards.org/cgi-bin/carddisp.pl?gene=NPHS2">https://www.genecards.org/cgi-bin/carddisp.pl?gene=NPHS2</a>                 |
| NOX1          | NADPH Oxidase 1                                    | Protein Coding | 41 | GC0XM100843 | 1.195215 | <a href="https://www.genecards.org/cgi-bin/carddisp.pl?gene=NOX1">https://www.genecards.org/cgi-bin/carddisp.pl?gene=NOX1</a>                   |
| CCNA2         | Cyclin A2                                          | Protein Coding | 44 | GC04M121816 | 1.194973 | <a href="https://www.genecards.org/cgi-bin/carddisp.pl?gene=CCNA2">https://www.genecards.org/cgi-bin/carddisp.pl?gene=CCNA2</a>                 |
| CSF2RA        | Colony Stimulating Factor 2 Receptor Subunit Alpha | Protein Coding | 43 | GC0XP001676 | 1.186367 | <a href="https://www.genecards.org/cgi-bin/carddisp.pl?gene=CSF2RA">https://www.genecards.org/cgi-bin/carddisp.pl?gene=CSF2RA</a>               |
| TPT1          | Tumor Protein, Translationally-Controlled 1        | Protein Coding | 45 | GC13M045333 | 1.185415 | <a href="https://www.genecards.org/cgi-bin/carddisp.pl?gene=TPT1">https://www.genecards.org/cgi-bin/carddisp.pl?gene=TPT1</a>                   |

|          |                                                    |                |    |             |          |                                                                                                                                       |
|----------|----------------------------------------------------|----------------|----|-------------|----------|---------------------------------------------------------------------------------------------------------------------------------------|
| LMO2     | LIM Domain Only 2                                  | Protein Coding | 41 | GC11M033858 | 1.185415 | <a href="https://www.genecards.org/cgi-bin/carddisp.pl?gene=LMO2">https://www.genecards.org/cgi-bin/carddisp.pl?gene=LMO2</a>         |
| SERPINB5 | Serpin Family B Member 5                           | Protein Coding | 41 | GC18P063476 | 1.185415 | <a href="https://www.genecards.org/cgi-bin/carddisp.pl?gene=SERPINB5">https://www.genecards.org/cgi-bin/carddisp.pl?gene=SERPINB5</a> |
| TRADD    | TNFRSF1A Associated Via Death Domain               | Protein Coding | 41 | GC16M067154 | 1.185415 | <a href="https://www.genecards.org/cgi-bin/carddisp.pl?gene=TRADD">https://www.genecards.org/cgi-bin/carddisp.pl?gene=TRADD</a>       |
| DDX18    | DEAD-Box Helicase 18                               | Protein Coding | 40 | GC02P122504 | 1.185415 | <a href="https://www.genecards.org/cgi-bin/carddisp.pl?gene=DDX18">https://www.genecards.org/cgi-bin/carddisp.pl?gene=DDX18</a>       |
| RPN2     | Ribophorin II                                      | Protein Coding | 40 | GC20P037178 | 1.185415 | <a href="https://www.genecards.org/cgi-bin/carddisp.pl?gene=RPN2">https://www.genecards.org/cgi-bin/carddisp.pl?gene=RPN2</a>         |
| NAV2     | Neuron Navigator 2                                 | Protein Coding | 38 | GC11P019345 | 1.185415 | <a href="https://www.genecards.org/cgi-bin/carddisp.pl?gene=NAV2">https://www.genecards.org/cgi-bin/carddisp.pl?gene=NAV2</a>         |
| SARM1    | Sterile Alpha And TIR Motif Containing 1           | Protein Coding | 38 | GC17P028364 | 1.185415 | <a href="https://www.genecards.org/cgi-bin/carddisp.pl?gene=SARM1">https://www.genecards.org/cgi-bin/carddisp.pl?gene=SARM1</a>       |
| SLC30A6  | Solute Carrier Family 30 Member 6                  | Protein Coding | 37 | GC02P032166 | 1.185415 | <a href="https://www.genecards.org/cgi-bin/carddisp.pl?gene=SLC30A6">https://www.genecards.org/cgi-bin/carddisp.pl?gene=SLC30A6</a>   |
| BTN3A2   | Butyrophilin Subfamily 3 Member A2                 | Protein Coding | 36 | GC06P026365 | 1.185415 | <a href="https://www.genecards.org/cgi-bin/carddisp.pl?gene=BTN3A2">https://www.genecards.org/cgi-bin/carddisp.pl?gene=BTN3A2</a>     |
| E2F3-IT1 | E2F3 Intronic Transcript 1                         | RNA Gene       | 12 | GC06P020403 | 1.185415 | <a href="https://www.genecards.org/cgi-bin/carddisp.pl?gene=E2F3-IT1">https://www.genecards.org/cgi-bin/carddisp.pl?gene=E2F3-IT1</a> |
| SKP1     | S-Phase Kinase Associated Protein 1                | Protein Coding | 41 | GC05M134148 | 1.182462 | <a href="https://www.genecards.org/cgi-bin/carddisp.pl?gene=SKP1">https://www.genecards.org/cgi-bin/carddisp.pl?gene=SKP1</a>         |
| RPL3     | Ribosomal Protein L3                               | Protein Coding | 40 | GC22M057593 | 1.182462 | <a href="https://www.genecards.org/cgi-bin/carddisp.pl?gene=RPL3">https://www.genecards.org/cgi-bin/carddisp.pl?gene=RPL3</a>         |
| UBR5     | Ubiquitin Protein Ligase E3 Component N-Recognin 5 | Protein Coding | 40 | GC08M102252 | 1.182462 | <a href="https://www.genecards.org/cgi-bin/carddisp.pl?gene=UBR5">https://www.genecards.org/cgi-bin/carddisp.pl?gene=UBR5</a>         |
| ORMDL3   | ORMDL Sphingolipid Biosynthesis Regulator 3        | Protein Coding | 39 | GC17M039921 | 1.182462 | <a href="https://www.genecards.org/cgi-">https://www.genecards.org/cgi-</a>                                                           |

|         |                                                                    |                |    |             |          |                                                                                                                                     |
|---------|--------------------------------------------------------------------|----------------|----|-------------|----------|-------------------------------------------------------------------------------------------------------------------------------------|
|         |                                                                    |                |    |             |          | <a href="#">bin/carddisp.pl?gene=ORMDL3</a>                                                                                         |
| CDH22   | Cadherin 22                                                        | Protein Coding | 38 | GC20M046173 | 1.182462 | <a href="https://www.genecards.org/cgi-bin/carddisp.pl?gene=CDH22">https://www.genecards.org/cgi-bin/carddisp.pl?gene=CDH22</a>     |
| ICAM4   | Intercellular Adhesion Molecule 4 (Landsteiner-Wiener Blood Group) | Protein Coding | 36 | GC19P010286 | 1.182462 | <a href="https://www.genecards.org/cgi-bin/carddisp.pl?gene=ICAM4">https://www.genecards.org/cgi-bin/carddisp.pl?gene=ICAM4</a>     |
| TSPAN33 | Tetraspanin 33                                                     | Protein Coding | 36 | GC07P131929 | 1.182462 | <a href="https://www.genecards.org/cgi-bin/carddisp.pl?gene=TSPAN33">https://www.genecards.org/cgi-bin/carddisp.pl?gene=TSPAN33</a> |
| ZNF318  | Zinc Finger Protein 318                                            | Protein Coding | 35 | GC06M066206 | 1.182462 | <a href="https://www.genecards.org/cgi-bin/carddisp.pl?gene=ZNF318">https://www.genecards.org/cgi-bin/carddisp.pl?gene=ZNF318</a>   |
| UMODL1  | Uromodulin Like 1                                                  | Protein Coding | 34 | GC21P042062 | 1.182462 | <a href="https://www.genecards.org/cgi-bin/carddisp.pl?gene=UMODL1">https://www.genecards.org/cgi-bin/carddisp.pl?gene=UMODL1</a>   |
| CTIF    | Cap Binding Complex Dependent Translation Initiation Factor        | Protein Coding | 32 | GC18P048539 | 1.182462 | <a href="https://www.genecards.org/cgi-bin/carddisp.pl?gene=CTIF">https://www.genecards.org/cgi-bin/carddisp.pl?gene=CTIF</a>       |
| CEP170B | Centrosomal Protein 170B                                           | Protein Coding | 30 | GC14P109737 | 1.182462 | <a href="https://www.genecards.org/cgi-bin/carddisp.pl?gene=CEP170B">https://www.genecards.org/cgi-bin/carddisp.pl?gene=CEP170B</a> |
| STXBP2  | Syntaxin Binding Protein 2                                         | Protein Coding | 44 | GC19P007856 | 1.181562 | <a href="https://www.genecards.org/cgi-bin/carddisp.pl?gene=STXBP2">https://www.genecards.org/cgi-bin/carddisp.pl?gene=STXBP2</a>   |
| THAP1   | THAP Domain Containing 1                                           | Protein Coding | 39 | GC08M042836 | 1.181562 | <a href="https://www.genecards.org/cgi-bin/carddisp.pl?gene=THAP1">https://www.genecards.org/cgi-bin/carddisp.pl?gene=THAP1</a>     |
| CPB2    | Carboxypeptidase B2                                                | Protein Coding | 44 | GC13M046053 | 1.180554 | <a href="https://www.genecards.org/cgi-bin/carddisp.pl?gene=CPB2">https://www.genecards.org/cgi-bin/carddisp.pl?gene=CPB2</a>       |
| DRD2    | Dopamine Receptor D2                                               | Protein Coding | 48 | GC11M113409 | 1.180007 | <a href="https://www.genecards.org/cgi-bin/carddisp.pl?gene=DRD2">https://www.genecards.org/cgi-bin/carddisp.pl?gene=DRD2</a>       |
| PCBD1   | Pterin-4 Alpha-Carbinolamine Dehydratase 1                         | Protein Coding | 43 | GC10M070882 | 1.172204 | <a href="https://www.genecards.org/cgi-bin/carddisp.pl?gene=PCBD1">https://www.genecards.org/cgi-bin/carddisp.pl?gene=PCBD1</a>     |
| MCHR1   | Melanin Concentrating Hormone Receptor 1                           | Protein Coding | 40 | GC22P040679 | 1.172204 | <a href="https://www.genecards.org/cgi-bin/carddisp.pl?gene=MCHR1">https://www.genecards.org/cgi-bin/carddisp.pl?gene=MCHR1</a>     |

|        |                                                |                |    |             |          |                                                                                                                                   |
|--------|------------------------------------------------|----------------|----|-------------|----------|-----------------------------------------------------------------------------------------------------------------------------------|
| MAGEA1 | MAGE Family Member A1                          | Protein Coding | 37 | GC0XP153179 | 1.169714 | <a href="https://www.genecards.org/cgi-bin/carddisp.pl?gene=MAGEA1">https://www.genecards.org/cgi-bin/carddisp.pl?gene=MAGEA1</a> |
| TRO    | Trophinin                                      | Protein Coding | 37 | GC0XP054920 | 1.169714 | <a href="https://www.genecards.org/cgi-bin/carddisp.pl?gene=TRO">https://www.genecards.org/cgi-bin/carddisp.pl?gene=TRO</a>       |
| GNRH1  | Gonadotropin Releasing Hormone 1               | Protein Coding | 39 | GC08M025419 | 1.167608 | <a href="https://www.genecards.org/cgi-bin/carddisp.pl?gene=GNRH1">https://www.genecards.org/cgi-bin/carddisp.pl?gene=GNRH1</a>   |
| FGF8   | Fibroblast Growth Factor 8                     | Protein Coding | 45 | GC10M101770 | 1.164202 | <a href="https://www.genecards.org/cgi-bin/carddisp.pl?gene=FGF8">https://www.genecards.org/cgi-bin/carddisp.pl?gene=FGF8</a>     |
| TXNIP  | Thioredoxin Interacting Protein                | Protein Coding | 37 | GC01M145992 | 1.162784 | <a href="https://www.genecards.org/cgi-bin/carddisp.pl?gene=TXNIP">https://www.genecards.org/cgi-bin/carddisp.pl?gene=TXNIP</a>   |
| CXCL3  | C-X-C Motif Chemokine Ligand 3                 | Protein Coding | 36 | GC04M074036 | 1.161772 | <a href="https://www.genecards.org/cgi-bin/carddisp.pl?gene=CXCL3">https://www.genecards.org/cgi-bin/carddisp.pl?gene=CXCL3</a>   |
| INPP5D | Inositol Polyphosphate-5-Phosphatase D         | Protein Coding | 44 | GC02P233059 | 1.161755 | <a href="https://www.genecards.org/cgi-bin/carddisp.pl?gene=INPP5D">https://www.genecards.org/cgi-bin/carddisp.pl?gene=INPP5D</a> |
| HIP1   | Huntingtin Interacting Protein 1               | Protein Coding | 40 | GC07M075533 | 1.161755 | <a href="https://www.genecards.org/cgi-bin/carddisp.pl?gene=HIP1">https://www.genecards.org/cgi-bin/carddisp.pl?gene=HIP1</a>     |
| CORD1  | Cone Rod Dystrophy 1 (Autosomal Dominant)      | Genetic Locus  | 4  | GC18U990008 | 1.161755 | <a href="https://www.genecards.org/cgi-bin/carddisp.pl?gene=CORD1">https://www.genecards.org/cgi-bin/carddisp.pl?gene=CORD1</a>   |
| LRG1   | Leucine Rich Alpha-2-Glycoprotein 1            | Protein Coding | 39 | GC19M005467 | 1.159959 | <a href="https://www.genecards.org/cgi-bin/carddisp.pl?gene=LRG1">https://www.genecards.org/cgi-bin/carddisp.pl?gene=LRG1</a>     |
| FYN    | FYN Proto-Oncogene, Src Family Tyrosine Kinase | Protein Coding | 45 | GC06M111660 | 1.15329  | <a href="https://www.genecards.org/cgi-bin/carddisp.pl?gene=FYN">https://www.genecards.org/cgi-bin/carddisp.pl?gene=FYN</a>       |
| MORC3  | MORC Family CW-Type Zinc Finger 3              | Protein Coding | 34 | GC21P036320 | 1.153072 | <a href="https://www.genecards.org/cgi-bin/carddisp.pl?gene=MORC3">https://www.genecards.org/cgi-bin/carddisp.pl?gene=MORC3</a>   |
| DPP6   | Dipeptidyl Peptidase Like 6                    | Protein Coding | 44 | GC07P153748 | 1.151047 | <a href="https://www.genecards.org/cgi-bin/carddisp.pl?gene=DPP6">https://www.genecards.org/cgi-bin/carddisp.pl?gene=DPP6</a>     |
| COL4A4 | Collagen Type IV Alpha 4 Chain                 | Protein Coding | 43 | GC02M226973 | 1.151047 | <a href="https://www.genecards.org/cgi-bin/carddisp.pl?gene=COL4A4">https://www.genecards.org/cgi-bin/carddisp.pl?gene=COL4A4</a> |

|          |                                                               |                |    |             |          |                                                                                                                                      |
|----------|---------------------------------------------------------------|----------------|----|-------------|----------|--------------------------------------------------------------------------------------------------------------------------------------|
|          |                                                               |                |    |             |          | <a href="http://www.ncbi.nlm.nih.gov/ncbi/cdd/bin/carddisp.pl?gene=COL4A4">bin/carddisp.pl?gene=COL4A4</a>                           |
| SEPSECS  | Sep (O-Phosphoserine) TRNA:Sec (Selenocysteine) TRNA Synthase | Protein Coding | 42 | GC04M025121 | 1.151047 | <a href="http://www.genecards.org/cgi-bin/carddisp.pl?gene=SEPSECS">https://www.genecards.org/cgi-bin/carddisp.pl?gene=SEPSECS</a>   |
| FST      | Follistatin                                                   | Protein Coding | 45 | GC05P053480 | 1.146774 | <a href="http://www.genecards.org/cgi-bin/carddisp.pl?gene=FST">https://www.genecards.org/cgi-bin/carddisp.pl?gene=FST</a>           |
| CCNB1    | Cyclin B1                                                     | Protein Coding | 44 | GC05P069167 | 1.142886 | <a href="http://www.genecards.org/cgi-bin/carddisp.pl?gene=CCNB1">https://www.genecards.org/cgi-bin/carddisp.pl?gene=CCNB1</a>       |
| ABCA3    | ATP Binding Cassette Subfamily A Member 3                     | Protein Coding | 48 | GC16M002275 | 1.142593 | <a href="http://www.genecards.org/cgi-bin/carddisp.pl?gene=ABCA3">https://www.genecards.org/cgi-bin/carddisp.pl?gene=ABCA3</a>       |
| KRT7     | Keratin 7                                                     | Protein Coding | 41 | GC12P052232 | 1.142593 | <a href="http://www.genecards.org/cgi-bin/carddisp.pl?gene=KRT7">https://www.genecards.org/cgi-bin/carddisp.pl?gene=KRT7</a>         |
| FPR1     | Formyl Peptide Receptor 1                                     | Protein Coding | 46 | GC19M051745 | 1.141736 | <a href="http://www.genecards.org/cgi-bin/carddisp.pl?gene=FPR1">https://www.genecards.org/cgi-bin/carddisp.pl?gene=FPR1</a>         |
| ATP4A    | ATPase H+/K+ Transporting Subunit Alpha                       | Protein Coding | 40 | GC19M066540 | 1.135156 | <a href="http://www.genecards.org/cgi-bin/carddisp.pl?gene=ATP4A">https://www.genecards.org/cgi-bin/carddisp.pl?gene=ATP4A</a>       |
| IGLL5    | Immunoglobulin Lambda Like Polypeptide 5                      | Protein Coding | 29 | GC22P036016 | 1.134276 | <a href="http://www.genecards.org/cgi-bin/carddisp.pl?gene=IGLL5">https://www.genecards.org/cgi-bin/carddisp.pl?gene=IGLL5</a>       |
| MIR486-1 | MicroRNA 486-1                                                | RNA Gene       | 18 | GC08M041660 | 1.132564 | <a href="http://www.genecards.org/cgi-bin/carddisp.pl?gene=MIR486-1">https://www.genecards.org/cgi-bin/carddisp.pl?gene=MIR486-1</a> |
| HCP5     | HLA Complex P5                                                | RNA Gene       | 29 | GC06P031400 | 1.131999 | <a href="http://www.genecards.org/cgi-bin/carddisp.pl?gene=HCP5">https://www.genecards.org/cgi-bin/carddisp.pl?gene=HCP5</a>         |
| NOTCH3   | Notch Receptor 3                                              | Protein Coding | 48 | GC19M015159 | 1.131546 | <a href="http://www.genecards.org/cgi-bin/carddisp.pl?gene=NOTCH3">https://www.genecards.org/cgi-bin/carddisp.pl?gene=NOTCH3</a>     |
| TPSB2    | Tryptase Beta 2                                               | Protein Coding | 39 | GC16M001227 | 1.128264 | <a href="http://www.genecards.org/cgi-bin/carddisp.pl?gene=TPSB2">https://www.genecards.org/cgi-bin/carddisp.pl?gene=TPSB2</a>       |
| KIF21B   | Kinesin Family Member 21B                                     | Protein Coding | 35 | GC01M200938 | 1.128264 | <a href="http://www.genecards.org/cgi-bin/carddisp.pl?gene=KIF21B">https://www.genecards.org/cgi-bin/carddisp.pl?gene=KIF21B</a>     |

|           |                                                          |                |    |             |          |                                                                                                                                         |
|-----------|----------------------------------------------------------|----------------|----|-------------|----------|-----------------------------------------------------------------------------------------------------------------------------------------|
| MEST      | Mesoderm Specific Transcript                             | Protein Coding | 40 | GC07P130486 | 1.125553 | <a href="https://www.genecards.org/cgi-bin/carddisp.pl?gene=MEST">https://www.genecards.org/cgi-bin/carddisp.pl?gene=MEST</a>           |
| C1GALT1C1 | C1GALT1 Specific Chaperone 1                             | Protein Coding | 36 | GC0XM120625 | 1.125553 | <a href="https://www.genecards.org/cgi-bin/carddisp.pl?gene=C1GALT1C1">https://www.genecards.org/cgi-bin/carddisp.pl?gene=C1GALT1C1</a> |
| MME       | Membrane Metalloendopeptidase                            | Protein Coding | 48 | GC03P155024 | 1.1255   | <a href="https://www.genecards.org/cgi-bin/carddisp.pl?gene=MME">https://www.genecards.org/cgi-bin/carddisp.pl?gene=MME</a>             |
| TNNT3     | Troponin T3, Fast Skeletal Type                          | Protein Coding | 42 | GC11P001920 | 1.123285 | <a href="https://www.genecards.org/cgi-bin/carddisp.pl?gene=TNNT3">https://www.genecards.org/cgi-bin/carddisp.pl?gene=TNNT3</a>         |
| SLC16A4   | Solute Carrier Family 16 Member 4                        | Protein Coding | 38 | GC01M110362 | 1.122542 | <a href="https://www.genecards.org/cgi-bin/carddisp.pl?gene=SLC16A4">https://www.genecards.org/cgi-bin/carddisp.pl?gene=SLC16A4</a>     |
| TP53AIP1  | Tumor Protein P53 Regulated Apoptosis Inducing Protein 1 | Protein Coding | 34 | GC11M128934 | 1.121662 | <a href="https://www.genecards.org/cgi-bin/carddisp.pl?gene=TP53AIP1">https://www.genecards.org/cgi-bin/carddisp.pl?gene=TP53AIP1</a>   |
| FOSL2     | FOS Like 2, AP-1 Transcription Factor Subunit            | Protein Coding | 40 | GC02P028392 | 1.118083 | <a href="https://www.genecards.org/cgi-bin/carddisp.pl?gene=FOSL2">https://www.genecards.org/cgi-bin/carddisp.pl?gene=FOSL2</a>         |
| TDRD9     | Tudor Domain Containing 9                                | Protein Coding | 39 | GC14P109720 | 1.116959 | <a href="https://www.genecards.org/cgi-bin/carddisp.pl?gene=TDRD9">https://www.genecards.org/cgi-bin/carddisp.pl?gene=TDRD9</a>         |
| ANXA7     | Annexin A7                                               | Protein Coding | 41 | GC10M073375 | 1.115158 | <a href="https://www.genecards.org/cgi-bin/carddisp.pl?gene=ANXA7">https://www.genecards.org/cgi-bin/carddisp.pl?gene=ANXA7</a>         |
| NKX2-5    | NK2 Homeobox 5                                           | Protein Coding | 43 | GC05M173232 | 1.114008 | <a href="https://www.genecards.org/cgi-bin/carddisp.pl?gene=NKX2-5">https://www.genecards.org/cgi-bin/carddisp.pl?gene=NKX2-5</a>       |
| POFUT2    | Protein O-Fucosyltransferase 2                           | Protein Coding | 37 | GC21M045263 | 1.114008 | <a href="https://www.genecards.org/cgi-bin/carddisp.pl?gene=POFUT2">https://www.genecards.org/cgi-bin/carddisp.pl?gene=POFUT2</a>       |
| ZFAT      | Zinc Finger And AT-Hook Domain Containing                | Protein Coding | 36 | GC08M134477 | 1.114008 | <a href="https://www.genecards.org/cgi-bin/carddisp.pl?gene=ZFAT">https://www.genecards.org/cgi-bin/carddisp.pl?gene=ZFAT</a>           |
| ARHGAP45  | Rho GTPase Activating Protein 45                         | Protein Coding | 29 | GC19P001065 | 1.114008 | <a href="https://www.genecards.org/cgi-bin/carddisp.pl?gene=ARHGAP45">https://www.genecards.org/cgi-bin/carddisp.pl?gene=ARHGAP45</a>   |
| CENPE     | Centromere Protein E                                     | Protein Coding | 44 | GC04M103105 | 1.11168  | <a href="https://www.genecards.org/cgi-bin/carddisp.pl?gene=CENPE">https://www.genecards.org/cgi-bin/carddisp.pl?gene=CENPE</a>         |



|       |                                                        |                |    |             |          |                                                                                                                                 |
|-------|--------------------------------------------------------|----------------|----|-------------|----------|---------------------------------------------------------------------------------------------------------------------------------|
|       |                                                        |                |    |             |          | <a href="#">bin/carddisp.pl?gene=CENPE</a>                                                                                      |
| INHBA | Inhibin Subunit Beta A                                 | Protein Coding | 44 | GC07M041668 | 1.11168  | <a href="https://www.genecards.org/cgi-bin/carddisp.pl?gene=INHBA">https://www.genecards.org/cgi-bin/carddisp.pl?gene=INHBA</a> |
| EDNRA | Endothelin Receptor Type A                             | Protein Coding | 47 | GC04P147480 | 1.10989  | <a href="https://www.genecards.org/cgi-bin/carddisp.pl?gene=EDNRA">https://www.genecards.org/cgi-bin/carddisp.pl?gene=EDNRA</a> |
| NM    | Neutrophil Migration                                   | Genetic Locus  | 5  | GC07U990060 | 1.108623 | <a href="https://www.genecards.org/cgi-bin/carddisp.pl?gene=NM">https://www.genecards.org/cgi-bin/carddisp.pl?gene=NM</a>       |
| VSIR  | V-Set Immunoregulatory Receptor                        | Protein Coding | 32 | GC10M071748 | 1.099166 | <a href="https://www.genecards.org/cgi-bin/carddisp.pl?gene=VSIR">https://www.genecards.org/cgi-bin/carddisp.pl?gene=VSIR</a>   |
| USP8  | Ubiquitin Specific Peptidase 8                         | Protein Coding | 46 | GC15P050424 | 1.097772 | <a href="https://www.genecards.org/cgi-bin/carddisp.pl?gene=USP8">https://www.genecards.org/cgi-bin/carddisp.pl?gene=USP8</a>   |
| KLF2  | Kruppel Like Factor 2                                  | Protein Coding | 39 | GC19P066201 | 1.094939 | <a href="https://www.genecards.org/cgi-bin/carddisp.pl?gene=KLF2">https://www.genecards.org/cgi-bin/carddisp.pl?gene=KLF2</a>   |
| JUND  | JunD Proto-Oncogene, AP-1 Transcription Factor Subunit | Protein Coding | 41 | GC19M018279 | 1.093878 | <a href="https://www.genecards.org/cgi-bin/carddisp.pl?gene=JUND">https://www.genecards.org/cgi-bin/carddisp.pl?gene=JUND</a>   |
| HTR1A | 5-Hydroxytryptamine Receptor 1A                        | Protein Coding | 45 | GC05M063960 | 1.092535 | <a href="https://www.genecards.org/cgi-bin/carddisp.pl?gene=HTR1A">https://www.genecards.org/cgi-bin/carddisp.pl?gene=HTR1A</a> |
| DCT   | Dopachrome Tautomerase                                 | Protein Coding | 43 | GC13M094436 | 1.092535 | <a href="https://www.genecards.org/cgi-bin/carddisp.pl?gene=DCT">https://www.genecards.org/cgi-bin/carddisp.pl?gene=DCT</a>     |
| CUL5  | Cullin 5                                               | Protein Coding | 42 | GC11P108008 | 1.092128 | <a href="https://www.genecards.org/cgi-bin/carddisp.pl?gene=CUL5">https://www.genecards.org/cgi-bin/carddisp.pl?gene=CUL5</a>   |
| ETV7  | ETS Variant Transcription Factor 7                     | Protein Coding | 34 | GC06M066113 | 1.092128 | <a href="https://www.genecards.org/cgi-bin/carddisp.pl?gene=ETV7">https://www.genecards.org/cgi-bin/carddisp.pl?gene=ETV7</a>   |
| FGF14 | Fibroblast Growth Factor 14                            | Protein Coding | 42 | GC13M101710 | 1.087138 | <a href="https://www.genecards.org/cgi-bin/carddisp.pl?gene=FGF14">https://www.genecards.org/cgi-bin/carddisp.pl?gene=FGF14</a> |
| NEU1  | Neuraminidase 1                                        | Protein Coding | 44 | GC06M031857 | 1.083123 | <a href="https://www.genecards.org/cgi-bin/carddisp.pl?gene=NEU1">https://www.genecards.org/cgi-bin/carddisp.pl?gene=NEU1</a>   |

|            |                                                                                                   |                |    |             |          |                                                                                                                                           |
|------------|---------------------------------------------------------------------------------------------------|----------------|----|-------------|----------|-------------------------------------------------------------------------------------------------------------------------------------------|
| IGHV4-38-2 | Immunoglobulin Heavy Variable 4-38-2                                                              | Protein Coding | 8  | GC14U901616 | 1.076324 | <a href="https://www.genecards.org/cgi-bin/carddisp.pl?gene=IGHV4-38-2">https://www.genecards.org/cgi-bin/carddisp.pl?gene=IGHV4-38-2</a> |
| KLK7       | Kallikrein Related Peptidase 7                                                                    | Protein Coding | 40 | GC19M066197 | 1.073234 | <a href="https://www.genecards.org/cgi-bin/carddisp.pl?gene=KLK7">https://www.genecards.org/cgi-bin/carddisp.pl?gene=KLK7</a>             |
| IVL        | Involucrin                                                                                        | Protein Coding | 37 | GC01P152909 | 1.073234 | <a href="https://www.genecards.org/cgi-bin/carddisp.pl?gene=IVL">https://www.genecards.org/cgi-bin/carddisp.pl?gene=IVL</a>               |
| NR1I2      | Nuclear Receptor Subfamily 1 Group I Member 2                                                     | Protein Coding | 44 | GC03P119780 | 1.072242 | <a href="https://www.genecards.org/cgi-bin/carddisp.pl?gene=NR1I2">https://www.genecards.org/cgi-bin/carddisp.pl?gene=NR1I2</a>           |
| PSMA3      | Proteasome 20S Subunit Alpha 3                                                                    | Protein Coding | 42 | GC14P058244 | 1.071438 | <a href="https://www.genecards.org/cgi-bin/carddisp.pl?gene=PSMA3">https://www.genecards.org/cgi-bin/carddisp.pl?gene=PSMA3</a>           |
| LASP1      | LIM And SH3 Protein 1                                                                             | Protein Coding | 41 | GC17P038869 | 1.071438 | <a href="https://www.genecards.org/cgi-bin/carddisp.pl?gene=LASP1">https://www.genecards.org/cgi-bin/carddisp.pl?gene=LASP1</a>           |
| H1-5       | H1.5 Linker Histone, Cluster Member                                                               | Protein Coding | 33 | GC06M066505 | 1.071438 | <a href="https://www.genecards.org/cgi-bin/carddisp.pl?gene=H1-5">https://www.genecards.org/cgi-bin/carddisp.pl?gene=H1-5</a>             |
| NUP205     | Nucleoporin 205                                                                                   | Protein Coding | 37 | GC07P135557 | 1.069558 | <a href="https://www.genecards.org/cgi-bin/carddisp.pl?gene=NUP205">https://www.genecards.org/cgi-bin/carddisp.pl?gene=NUP205</a>         |
| AIFM1      | Apoptosis Inducing Factor Mitochondria Associated 1                                               | Protein Coding | 46 | GC0XM130129 | 1.06615  | <a href="https://www.genecards.org/cgi-bin/carddisp.pl?gene=AIFM1">https://www.genecards.org/cgi-bin/carddisp.pl?gene=AIFM1</a>           |
| KDM1A      | Lysine Demethylase 1A                                                                             | Protein Coding | 46 | GC01P023019 | 1.06615  | <a href="https://www.genecards.org/cgi-bin/carddisp.pl?gene=KDM1A">https://www.genecards.org/cgi-bin/carddisp.pl?gene=KDM1A</a>           |
| TDO2       | Tryptophan 2,3-Dioxygenase                                                                        | Protein Coding | 44 | GC04P155854 | 1.065416 | <a href="https://www.genecards.org/cgi-bin/carddisp.pl?gene=TDO2">https://www.genecards.org/cgi-bin/carddisp.pl?gene=TDO2</a>             |
| FOXO4      | Forkhead Box O4                                                                                   | Protein Coding | 40 | GC0XP071095 | 1.065167 | <a href="https://www.genecards.org/cgi-bin/carddisp.pl?gene=FOXO4">https://www.genecards.org/cgi-bin/carddisp.pl?gene=FOXO4</a>           |
| SMARCB1    | SWI/SNF Related, Matrix Associated, Actin Dependent Regulator Of Chromatin, Subfamily B, Member 1 | Protein Coding | 44 | GC22P023786 | 1.058504 | <a href="https://www.genecards.org/cgi-bin/carddisp.pl?gene=SMARCB1">https://www.genecards.org/cgi-bin/carddisp.pl?gene=SMARCB1</a>       |

|         |                                                     |                |    |             |          |                                                                                                                                     |
|---------|-----------------------------------------------------|----------------|----|-------------|----------|-------------------------------------------------------------------------------------------------------------------------------------|
| NRAS    | NRAS Proto-Oncogene, GTPase                         | Protein Coding | 47 | GC01M114704 | 1.058404 | <a href="https://www.genecards.org/cgi-bin/carddisp.pl?gene=NRAS">https://www.genecards.org/cgi-bin/carddisp.pl?gene=NRAS</a>       |
| ARF1    | ADP Ribosylation Factor 1                           | Protein Coding | 44 | GC01P228082 | 1.058404 | <a href="https://www.genecards.org/cgi-bin/carddisp.pl?gene=ARF1">https://www.genecards.org/cgi-bin/carddisp.pl?gene=ARF1</a>       |
| DSC3    | Desmocollin 3                                       | Protein Coding | 42 | GC18M030990 | 1.058404 | <a href="https://www.genecards.org/cgi-bin/carddisp.pl?gene=DSC3">https://www.genecards.org/cgi-bin/carddisp.pl?gene=DSC3</a>       |
| NUP107  | Nucleoporin 107                                     | Protein Coding | 42 | GC12P068686 | 1.058404 | <a href="https://www.genecards.org/cgi-bin/carddisp.pl?gene=NUP107">https://www.genecards.org/cgi-bin/carddisp.pl?gene=NUP107</a>   |
| DST     | Dystonin                                            | Protein Coding | 41 | GC06M056457 | 1.058404 | <a href="https://www.genecards.org/cgi-bin/carddisp.pl?gene=DST">https://www.genecards.org/cgi-bin/carddisp.pl?gene=DST</a>         |
| FAF1    | Fas Associated Factor 1                             | Protein Coding | 41 | GC01M050439 | 1.058404 | <a href="https://www.genecards.org/cgi-bin/carddisp.pl?gene=FAF1">https://www.genecards.org/cgi-bin/carddisp.pl?gene=FAF1</a>       |
| ARFGAP1 | ADP Ribosylation Factor GTPase Activating Protein 1 | Protein Coding | 40 | GC20P063272 | 1.058404 | <a href="https://www.genecards.org/cgi-bin/carddisp.pl?gene=ARFGAP1">https://www.genecards.org/cgi-bin/carddisp.pl?gene=ARFGAP1</a> |
| NUP133  | Nucleoporin 133                                     | Protein Coding | 40 | GC01M229520 | 1.058404 | <a href="https://www.genecards.org/cgi-bin/carddisp.pl?gene=NUP133">https://www.genecards.org/cgi-bin/carddisp.pl?gene=NUP133</a>   |
| ARFGAP3 | ADP Ribosylation Factor GTPase Activating Protein 3 | Protein Coding | 39 | GC22M042796 | 1.058404 | <a href="https://www.genecards.org/cgi-bin/carddisp.pl?gene=ARFGAP3">https://www.genecards.org/cgi-bin/carddisp.pl?gene=ARFGAP3</a> |
| NUP85   | Nucleoporin 85                                      | Protein Coding | 39 | GC17P075205 | 1.058404 | <a href="https://www.genecards.org/cgi-bin/carddisp.pl?gene=NUP85">https://www.genecards.org/cgi-bin/carddisp.pl?gene=NUP85</a>     |
| RPS16   | Ribosomal Protein S16                               | Protein Coding | 39 | GC19M039433 | 1.058404 | <a href="https://www.genecards.org/cgi-bin/carddisp.pl?gene=RPS16">https://www.genecards.org/cgi-bin/carddisp.pl?gene=RPS16</a>     |
| DSC1    | Desmocollin 1                                       | Protein Coding | 38 | GC18M031129 | 1.058404 | <a href="https://www.genecards.org/cgi-bin/carddisp.pl?gene=DSC1">https://www.genecards.org/cgi-bin/carddisp.pl?gene=DSC1</a>       |
| PIR     | Pirin                                               | Protein Coding | 38 | GC0XM015402 | 1.058404 | <a href="https://www.genecards.org/cgi-bin/carddisp.pl?gene=PIR">https://www.genecards.org/cgi-bin/carddisp.pl?gene=PIR</a>         |
| RAB3IL1 | RAB3A Interacting Protein Like 1                    | Protein Coding | 37 | GC11M061897 | 1.058404 | <a href="https://www.genecards.org/cgi-">https://www.genecards.org/cgi-</a>                                                         |

|         |                                                                   |                |    |              |          |                                                                                                                                          |
|---------|-------------------------------------------------------------------|----------------|----|--------------|----------|------------------------------------------------------------------------------------------------------------------------------------------|
|         |                                                                   |                |    |              |          | <a href="http://www.ncbi.nlm.nih.gov/ncbi/cdd/cdddisp.pl?gene=RAB3IL1">bin/cdddisp.pl?gene=RAB3IL1</a>                                   |
| AHCTF1  | AT-Hook Containing Transcription Factor 1                         | Protein Coding | 36 | GC01M246840  | 1.058404 | <a href="http://www.ncbi.nlm.nih.gov/ncbi/cdd/cdddisp.pl?gene=AHCTF1">https://www.ncbi.nlm.nih.gov/ncbi/cdd/cdddisp.pl?gene=AHCTF1</a>   |
| ANKRD49 | Ankyrin Repeat Domain 49                                          | Protein Coding | 36 | GC11P094493  | 1.058404 | <a href="http://www.ncbi.nlm.nih.gov/ncbi/cdd/cdddisp.pl?gene=ANKRD49">https://www.ncbi.nlm.nih.gov/ncbi/cdd/cdddisp.pl?gene=ANKRD49</a> |
| ARFGAP2 | ADP Ribosylation Factor GTPase Activating Protein 2               | Protein Coding | 35 | GC11M089355  | 1.058404 | <a href="http://www.ncbi.nlm.nih.gov/ncbi/cdd/cdddisp.pl?gene=ARFGAP2">https://www.ncbi.nlm.nih.gov/ncbi/cdd/cdddisp.pl?gene=ARFGAP2</a> |
| NUP43   | Nucleoporin 43                                                    | Protein Coding | 33 | GC06M149724  | 1.058404 | <a href="http://www.ncbi.nlm.nih.gov/ncbi/cdd/cdddisp.pl?gene=NUP43">https://www.ncbi.nlm.nih.gov/ncbi/cdd/cdddisp.pl?gene=NUP43</a>     |
| MT-TF   | Mitochondrially Encoded TRNA-Phe (UUU/C)                          | RNA Gene       | 14 | GCMT P000580 | 1.058404 | <a href="http://www.ncbi.nlm.nih.gov/ncbi/cdd/cdddisp.pl?gene=MT-TF">https://www.ncbi.nlm.nih.gov/ncbi/cdd/cdddisp.pl?gene=MT-TF</a>     |
| MT-TH   | Mitochondrially Encoded TRNA-His (CAU/C)                          | RNA Gene       | 14 | GCMT P012140 | 1.058404 | <a href="http://www.ncbi.nlm.nih.gov/ncbi/cdd/cdddisp.pl?gene=MT-TH">https://www.ncbi.nlm.nih.gov/ncbi/cdd/cdddisp.pl?gene=MT-TH</a>     |
| MT-TK   | Mitochondrially Encoded TRNA-Lys (AAA/G)                          | RNA Gene       | 14 | GCMT P008297 | 1.058404 | <a href="http://www.ncbi.nlm.nih.gov/ncbi/cdd/cdddisp.pl?gene=MT-TK">https://www.ncbi.nlm.nih.gov/ncbi/cdd/cdddisp.pl?gene=MT-TK</a>     |
| MT-TG   | Mitochondrially Encoded TRNA-Gly (GGN)                            | RNA Gene       | 13 | GCMT P009993 | 1.058404 | <a href="http://www.ncbi.nlm.nih.gov/ncbi/cdd/cdddisp.pl?gene=MT-TG">https://www.ncbi.nlm.nih.gov/ncbi/cdd/cdddisp.pl?gene=MT-TG</a>     |
| NPC2    | NPC Intracellular Cholesterol Transporter 2                       | Protein Coding | 41 | GC14M074476  | 1.056815 | <a href="http://www.ncbi.nlm.nih.gov/ncbi/cdd/cdddisp.pl?gene=NPC2">https://www.ncbi.nlm.nih.gov/ncbi/cdd/cdddisp.pl?gene=NPC2</a>       |
| ISG15   | ISG15 Ubiquitin Like Modifier                                     | Protein Coding | 44 | GC01P001001  | 1.056545 | <a href="http://www.ncbi.nlm.nih.gov/ncbi/cdd/cdddisp.pl?gene=ISG15">https://www.ncbi.nlm.nih.gov/ncbi/cdd/cdddisp.pl?gene=ISG15</a>     |
| HUWE1   | HECT, UBA And WWE Domain Containing E3 Ubiquitin Protein Ligase 1 | Protein Coding | 42 | GC0XM053532  | 1.055635 | <a href="http://www.ncbi.nlm.nih.gov/ncbi/cdd/cdddisp.pl?gene=HUWE1">https://www.ncbi.nlm.nih.gov/ncbi/cdd/cdddisp.pl?gene=HUWE1</a>     |
| PMAIP1  | Phorbol-12-Myristate-13-Acetate-Induced Protein 1                 | Protein Coding | 38 | GC18P059899  | 1.055635 | <a href="http://www.ncbi.nlm.nih.gov/ncbi/cdd/cdddisp.pl?gene=PMAIP1">https://www.ncbi.nlm.nih.gov/ncbi/cdd/cdddisp.pl?gene=PMAIP1</a>   |
| SIK2    | Salt Inducible Kinase 2                                           | Protein Coding | 42 | GC11P111920  | 1.054219 | <a href="http://www.ncbi.nlm.nih.gov/ncbi/cdd/cdddisp.pl?gene=SIK2">https://www.ncbi.nlm.nih.gov/ncbi/cdd/cdddisp.pl?gene=SIK2</a>       |

|          |                                             |                |    |             |          |                                                                                                                                       |
|----------|---------------------------------------------|----------------|----|-------------|----------|---------------------------------------------------------------------------------------------------------------------------------------|
| SIGLEC15 | Sialic Acid Binding Ig Like Lectin 15       | Protein Coding | 34 | GC18P045825 | 1.052802 | <a href="https://www.genecards.org/cgi-bin/carddisp.pl?gene=SIGLEC15">https://www.genecards.org/cgi-bin/carddisp.pl?gene=SIGLEC15</a> |
| ALYREF   | Aly/REF Export Factor                       | Protein Coding | 37 | GC17M081887 | 1.05225  | <a href="https://www.genecards.org/cgi-bin/carddisp.pl?gene=ALYREF">https://www.genecards.org/cgi-bin/carddisp.pl?gene=ALYREF</a>     |
| SAE1     | SUMO1 Activating Enzyme Subunit 1           | Protein Coding | 44 | GC19P066970 | 1.051125 | <a href="https://www.genecards.org/cgi-bin/carddisp.pl?gene=SAE1">https://www.genecards.org/cgi-bin/carddisp.pl?gene=SAE1</a>         |
| UBA2     | Ubiquitin Like Modifier Activating Enzyme 2 | Protein Coding | 43 | GC19P034428 | 1.051125 | <a href="https://www.genecards.org/cgi-bin/carddisp.pl?gene=UBA2">https://www.genecards.org/cgi-bin/carddisp.pl?gene=UBA2</a>         |
| KLRG1    | Killer Cell Lectin Like Receptor G1         | Protein Coding | 37 | GC12P008950 | 1.047638 | <a href="https://www.genecards.org/cgi-bin/carddisp.pl?gene=KLRG1">https://www.genecards.org/cgi-bin/carddisp.pl?gene=KLRG1</a>       |
| NFKBIZ   | NFKB Inhibitor Zeta                         | Protein Coding | 37 | GC03P101827 | 1.045705 | <a href="https://www.genecards.org/cgi-bin/carddisp.pl?gene=NFKBIZ">https://www.genecards.org/cgi-bin/carddisp.pl?gene=NFKBIZ</a>     |
| TRIM26   | Tripartite Motif Containing 26              | Protein Coding | 36 | GC06M030184 | 1.045705 | <a href="https://www.genecards.org/cgi-bin/carddisp.pl?gene=TRIM26">https://www.genecards.org/cgi-bin/carddisp.pl?gene=TRIM26</a>     |
| PI4KA    | Phosphatidylinositol 4-Kinase Alpha         | Protein Coding | 46 | GC22M020707 | 1.043198 | <a href="https://www.genecards.org/cgi-bin/carddisp.pl?gene=PI4KA">https://www.genecards.org/cgi-bin/carddisp.pl?gene=PI4KA</a>       |
| MIR24-2  | MicroRNA 24-2                               | RNA Gene       | 20 | GC19M014483 | 1.041605 | <a href="https://www.genecards.org/cgi-bin/carddisp.pl?gene=MIR24-2">https://www.genecards.org/cgi-bin/carddisp.pl?gene=MIR24-2</a>   |
| MYO9B    | Myosin IXB                                  | Protein Coding | 43 | GC19P066216 | 1.040936 | <a href="https://www.genecards.org/cgi-bin/carddisp.pl?gene=MYO9B">https://www.genecards.org/cgi-bin/carddisp.pl?gene=MYO9B</a>       |
| PDYN     | Prodynorphin                                | Protein Coding | 43 | GC20M001978 | 1.038956 | <a href="https://www.genecards.org/cgi-bin/carddisp.pl?gene=PDYN">https://www.genecards.org/cgi-bin/carddisp.pl?gene=PDYN</a>         |
| CAPS2    | Calcyphosine 2                              | Protein Coding | 32 | GC12M075260 | 1.037439 | <a href="https://www.genecards.org/cgi-bin/carddisp.pl?gene=CAPS2">https://www.genecards.org/cgi-bin/carddisp.pl?gene=CAPS2</a>       |
| MIR9-2   | MicroRNA 9-2                                | RNA Gene       | 20 | GC05M088666 | 1.032208 | <a href="https://www.genecards.org/cgi-bin/carddisp.pl?gene=MIR9-2">https://www.genecards.org/cgi-bin/carddisp.pl?gene=MIR9-2</a>     |
| MIR9-3   | MicroRNA 9-3                                | RNA Gene       | 20 | GC15P089368 | 1.032208 | <a href="https://www.genecards.org/cgi-bin/carddisp.pl?gene=MIR9-3">https://www.genecards.org/cgi-bin/carddisp.pl?gene=MIR9-3</a>     |

|        |                                             |                |    |             |          |                                                                                                                                          |
|--------|---------------------------------------------|----------------|----|-------------|----------|------------------------------------------------------------------------------------------------------------------------------------------|
|        |                                             |                |    |             |          | <a href="http://www.ncbi.nlm.nih.gov/ncbi/cdd/bin/carddisp.pl?gene=MIR9-3">bin/carddisp.pl?gene=MIR9-3</a>                               |
| OAS1   | 2'-5'-Oligoadenylate Synthetase 1           | Protein Coding | 43 | GC12P112939 | 1.030091 | <a href="http://www.ncbi.nlm.nih.gov/ncbi/cdd/bin/carddisp.pl?gene=OAS1">https://www.genecards.org/cgi-bin/carddisp.pl?gene=OAS1</a>     |
| CDC42  | Cell Division Cycle 42                      | Protein Coding | 49 | GC01P022052 | 1.029915 | <a href="http://www.ncbi.nlm.nih.gov/ncbi/cdd/bin/carddisp.pl?gene=CDC42">https://www.genecards.org/cgi-bin/carddisp.pl?gene=CDC42</a>   |
| PRNP   | Prion Protein                               | Protein Coding | 45 | GC20P004686 | 1.029915 | <a href="http://www.ncbi.nlm.nih.gov/ncbi/cdd/bin/carddisp.pl?gene=PRNP">https://www.genecards.org/cgi-bin/carddisp.pl?gene=PRNP</a>     |
| FGF17  | Fibroblast Growth Factor 17                 | Protein Coding | 44 | GC08P022042 | 1.029915 | <a href="http://www.ncbi.nlm.nih.gov/ncbi/cdd/bin/carddisp.pl?gene=FGF17">https://www.genecards.org/cgi-bin/carddisp.pl?gene=FGF17</a>   |
| WASF1  | WASP Family Member 1                        | Protein Coding | 43 | GC06M110099 | 1.029915 | <a href="http://www.ncbi.nlm.nih.gov/ncbi/cdd/bin/carddisp.pl?gene=WASF1">https://www.genecards.org/cgi-bin/carddisp.pl?gene=WASF1</a>   |
| NCK1   | NCK Adaptor Protein 1                       | Protein Coding | 42 | GC03P136862 | 1.029915 | <a href="http://www.ncbi.nlm.nih.gov/ncbi/cdd/bin/carddisp.pl?gene=NCK1">https://www.genecards.org/cgi-bin/carddisp.pl?gene=NCK1</a>     |
| WASF2  | WASP Family Member 2                        | Protein Coding | 41 | GC01M027404 | 1.029915 | <a href="http://www.ncbi.nlm.nih.gov/ncbi/cdd/bin/carddisp.pl?gene=WASF2">https://www.genecards.org/cgi-bin/carddisp.pl?gene=WASF2</a>   |
| ACTR3  | Actin Related Protein 3                     | Protein Coding | 40 | GC02P113889 | 1.029915 | <a href="http://www.ncbi.nlm.nih.gov/ncbi/cdd/bin/carddisp.pl?gene=ACTR3">https://www.genecards.org/cgi-bin/carddisp.pl?gene=ACTR3</a>   |
| BAIAP2 | BAR/IMD Domain Containing Adaptor Protein 2 | Protein Coding | 40 | GC17P081035 | 1.029915 | <a href="http://www.ncbi.nlm.nih.gov/ncbi/cdd/bin/carddisp.pl?gene=BAIAP2">https://www.genecards.org/cgi-bin/carddisp.pl?gene=BAIAP2</a> |
| WASF3  | WASP Family Member 3                        | Protein Coding | 40 | GC13P026557 | 1.029915 | <a href="http://www.ncbi.nlm.nih.gov/ncbi/cdd/bin/carddisp.pl?gene=WASF3">https://www.genecards.org/cgi-bin/carddisp.pl?gene=WASF3</a>   |
| WASL   | WASP Like Actin Nucleation Promoting Factor | Protein Coding | 40 | GC07M123681 | 1.029915 | <a href="http://www.ncbi.nlm.nih.gov/ncbi/cdd/bin/carddisp.pl?gene=WASL">https://www.genecards.org/cgi-bin/carddisp.pl?gene=WASL</a>     |
| TRIP10 | Thyroid Hormone Receptor Interactor 10      | Protein Coding | 38 | GC19P006737 | 1.029915 | <a href="http://www.ncbi.nlm.nih.gov/ncbi/cdd/bin/carddisp.pl?gene=TRIP10">https://www.genecards.org/cgi-bin/carddisp.pl?gene=TRIP10</a> |
| ARFRP1 | ADP Ribosylation Factor Related Protein 1   | Protein Coding | 37 | GC20M063698 | 1.029915 | <a href="http://www.ncbi.nlm.nih.gov/ncbi/cdd/bin/carddisp.pl?gene=ARFRP1">https://www.genecards.org/cgi-bin/carddisp.pl?gene=ARFRP1</a> |

|         |                                                                      |                |    |             |          |                                                                                                                                     |
|---------|----------------------------------------------------------------------|----------------|----|-------------|----------|-------------------------------------------------------------------------------------------------------------------------------------|
| NCKIPSD | NCK Interacting Protein With SH3 Domain                              | Protein Coding | 36 | GC03M048667 | 1.029915 | <a href="https://www.genecards.org/cgi-bin/carddisp.pl?gene=NCKIPSD">https://www.genecards.org/cgi-bin/carddisp.pl?gene=NCKIPSD</a> |
| PNMA2   | PNMA Family Member 2                                                 | Protein Coding | 36 | GC08M026504 | 1.029915 | <a href="https://www.genecards.org/cgi-bin/carddisp.pl?gene=PNMA2">https://www.genecards.org/cgi-bin/carddisp.pl?gene=PNMA2</a>     |
| WHAMM   | WASP Homolog Associated With Actin, Golgi Membranes And Microtubules | Protein Coding | 33 | GC15P117911 | 1.029915 | <a href="https://www.genecards.org/cgi-bin/carddisp.pl?gene=WHAMM">https://www.genecards.org/cgi-bin/carddisp.pl?gene=WHAMM</a>     |
| WASHC1  | WASH Complex Subunit 1                                               | Protein Coding | 23 | GC09M000016 | 1.029915 | <a href="https://www.genecards.org/cgi-bin/carddisp.pl?gene=WASHC1">https://www.genecards.org/cgi-bin/carddisp.pl?gene=WASHC1</a>   |
| WASH3P  | WASP Family Homolog 3, Pseudogene                                    | Pseudogene     | 20 | GC15P101960 | 1.029915 | <a href="https://www.genecards.org/cgi-bin/carddisp.pl?gene=WASH3P">https://www.genecards.org/cgi-bin/carddisp.pl?gene=WASH3P</a>   |
| WASH6P  | WASP Family Homolog 6, Pseudogene                                    | Pseudogene     | 18 | GC0XP156054 | 1.029915 | <a href="https://www.genecards.org/cgi-bin/carddisp.pl?gene=WASH6P">https://www.genecards.org/cgi-bin/carddisp.pl?gene=WASH6P</a>   |
| WASF4P  | WASP Family Member 4, Pseudogene                                     | Pseudogene     | 11 | GC0XP047804 | 1.029915 | <a href="https://www.genecards.org/cgi-bin/carddisp.pl?gene=WASF4P">https://www.genecards.org/cgi-bin/carddisp.pl?gene=WASF4P</a>   |
| ADAM8   | ADAM Metallopeptidase Domain 8                                       | Protein Coding | 42 | GC10M133262 | 1.029904 | <a href="https://www.genecards.org/cgi-bin/carddisp.pl?gene=ADAM8">https://www.genecards.org/cgi-bin/carddisp.pl?gene=ADAM8</a>     |
| MIA     | MIA SH3 Domain Containing                                            | Protein Coding | 37 | GC19P040771 | 1.027749 | <a href="https://www.genecards.org/cgi-bin/carddisp.pl?gene=MIA">https://www.genecards.org/cgi-bin/carddisp.pl?gene=MIA</a>         |
| TRIB3   | Tribbles Pseudokinase 3                                              | Protein Coding | 41 | GC20P000361 | 1.021446 | <a href="https://www.genecards.org/cgi-bin/carddisp.pl?gene=TRIB3">https://www.genecards.org/cgi-bin/carddisp.pl?gene=TRIB3</a>     |
| ACO1    | Aconitase 1                                                          | Protein Coding | 43 | GC09P032374 | 1.01676  | <a href="https://www.genecards.org/cgi-bin/carddisp.pl?gene=ACO1">https://www.genecards.org/cgi-bin/carddisp.pl?gene=ACO1</a>       |
| UBASH3B | Ubiquitin Associated And SH3 Domain Containing B                     | Protein Coding | 40 | GC11P122655 | 1.01676  | <a href="https://www.genecards.org/cgi-bin/carddisp.pl?gene=UBASH3B">https://www.genecards.org/cgi-bin/carddisp.pl?gene=UBASH3B</a> |
| HAS3    | Hyaluronan Synthase 3                                                | Protein Coding | 41 | GC16P069105 | 1.014896 | <a href="https://www.genecards.org/cgi-bin/carddisp.pl?gene=HAS3">https://www.genecards.org/cgi-bin/carddisp.pl?gene=HAS3</a>       |
| TRAF5   | TNF Receptor Associated Factor 5                                     | Protein Coding | 40 | GC01P211326 | 1.014896 | <a href="https://www.genecards.org/cgi-">https://www.genecards.org/cgi-</a>                                                         |

|         |                                                                  |                |    |             |          |                                                                                                                                            |
|---------|------------------------------------------------------------------|----------------|----|-------------|----------|--------------------------------------------------------------------------------------------------------------------------------------------|
|         |                                                                  |                |    |             |          | <a href="http://www.ncbi.nlm.nih.gov/ncbi/cdd/bin/carddisp.pl?gene=TRAF5">bin/carddisp.pl?gene=TRAF5</a>                                   |
| TSHR    | Thyroid Stimulating Hormone Receptor                             | Protein Coding | 45 | GC14P080954 | 1.013282 | <a href="http://www.ncbi.nlm.nih.gov/ncbi/cdd/bin/carddisp.pl?gene=TSHR">https://www.genecards.org/cgi-bin/carddisp.pl?gene=TSHR</a>       |
| AKT3    | AKT Serine/Threonine Kinase 3                                    | Protein Coding | 51 | GC01M243488 | 1.012203 | <a href="http://www.ncbi.nlm.nih.gov/ncbi/cdd/bin/carddisp.pl?gene=AKT3">https://www.genecards.org/cgi-bin/carddisp.pl?gene=AKT3</a>       |
| TBK1    | TANK Binding Kinase 1                                            | Protein Coding | 47 | GC12P064451 | 1.012203 | <a href="http://www.ncbi.nlm.nih.gov/ncbi/cdd/bin/carddisp.pl?gene=TBK1">https://www.genecards.org/cgi-bin/carddisp.pl?gene=TBK1</a>       |
| EXO1    | Exonuclease 1                                                    | Protein Coding | 42 | GC01P241847 | 1.012203 | <a href="http://www.ncbi.nlm.nih.gov/ncbi/cdd/bin/carddisp.pl?gene=EXO1">https://www.genecards.org/cgi-bin/carddisp.pl?gene=EXO1</a>       |
| F10     | Coagulation Factor X                                             | Protein Coding | 48 | GC13P113122 | 1.011449 | <a href="http://www.ncbi.nlm.nih.gov/ncbi/cdd/bin/carddisp.pl?gene=F10">https://www.genecards.org/cgi-bin/carddisp.pl?gene=F10</a>         |
| COL17A1 | Collagen Type XVII Alpha 1 Chain                                 | Protein Coding | 43 | GC10M104031 | 1.006446 | <a href="http://www.ncbi.nlm.nih.gov/ncbi/cdd/bin/carddisp.pl?gene=COL17A1">https://www.genecards.org/cgi-bin/carddisp.pl?gene=COL17A1</a> |
| PTPRN   | Protein Tyrosine Phosphatase Receptor Type N                     | Protein Coding | 43 | GC02M219289 | 1.006446 | <a href="http://www.ncbi.nlm.nih.gov/ncbi/cdd/bin/carddisp.pl?gene=PTPRN">https://www.genecards.org/cgi-bin/carddisp.pl?gene=PTPRN</a>     |
| LIMK1   | LIM Domain Kinase 1                                              | Protein Coding | 48 | GC07P074082 | 1.004889 | <a href="http://www.ncbi.nlm.nih.gov/ncbi/cdd/bin/carddisp.pl?gene=LIMK1">https://www.genecards.org/cgi-bin/carddisp.pl?gene=LIMK1</a>     |
| POLH    | DNA Polymerase Eta                                               | Protein Coding | 48 | GC06P043576 | 1.004889 | <a href="http://www.ncbi.nlm.nih.gov/ncbi/cdd/bin/carddisp.pl?gene=POLH">https://www.genecards.org/cgi-bin/carddisp.pl?gene=POLH</a>       |
| ITGA7   | Integrin Subunit Alpha 7                                         | Protein Coding | 46 | GC12M055684 | 1.004889 | <a href="http://www.ncbi.nlm.nih.gov/ncbi/cdd/bin/carddisp.pl?gene=ITGA7">https://www.genecards.org/cgi-bin/carddisp.pl?gene=ITGA7</a>     |
| LEF1    | Lymphoid Enhancer Binding Factor 1                               | Protein Coding | 46 | GC04M108047 | 1.004889 | <a href="http://www.ncbi.nlm.nih.gov/ncbi/cdd/bin/carddisp.pl?gene=LEF1">https://www.genecards.org/cgi-bin/carddisp.pl?gene=LEF1</a>       |
| TRPC3   | Transient Receptor Potential Cation Channel Subfamily C Member 3 | Protein Coding | 46 | GC04M121879 | 1.004889 | <a href="http://www.ncbi.nlm.nih.gov/ncbi/cdd/bin/carddisp.pl?gene=TRPC3">https://www.genecards.org/cgi-bin/carddisp.pl?gene=TRPC3</a>     |
| ABCD1   | ATP Binding Cassette Subfamily D Member 1                        | Protein Coding | 45 | GC0XP153724 | 1.004889 | <a href="http://www.ncbi.nlm.nih.gov/ncbi/cdd/bin/carddisp.pl?gene=ABCD1">https://www.genecards.org/cgi-bin/carddisp.pl?gene=ABCD1</a>     |



|        |                                                                  |                |    |             |          |                                                                                                                                   |
|--------|------------------------------------------------------------------|----------------|----|-------------|----------|-----------------------------------------------------------------------------------------------------------------------------------|
| FEN1   | Flap Structure-Specific Endonuclease 1                           | Protein Coding | 45 | GC11P061793 | 1.004889 | <a href="https://www.genecards.org/cgi-bin/carddisp.pl?gene=FEN1">https://www.genecards.org/cgi-bin/carddisp.pl?gene=FEN1</a>     |
| GALT   | Galactose-1-Phosphate Uridyltransferase                          | Protein Coding | 45 | GC09P047114 | 1.004889 | <a href="https://www.genecards.org/cgi-bin/carddisp.pl?gene=GALT">https://www.genecards.org/cgi-bin/carddisp.pl?gene=GALT</a>     |
| HADH   | Hydroxyacyl-CoA Dehydrogenase                                    | Protein Coding | 45 | GC04P107989 | 1.004889 | <a href="https://www.genecards.org/cgi-bin/carddisp.pl?gene=HADH">https://www.genecards.org/cgi-bin/carddisp.pl?gene=HADH</a>     |
| HCFC1  | Host Cell Factor C1                                              | Protein Coding | 45 | GC0XM153947 | 1.004889 | <a href="https://www.genecards.org/cgi-bin/carddisp.pl?gene=HCFC1">https://www.genecards.org/cgi-bin/carddisp.pl?gene=HCFC1</a>   |
| ACTG2  | Actin Gamma 2, Smooth Muscle                                     | Protein Coding | 44 | GC02P073892 | 1.004889 | <a href="https://www.genecards.org/cgi-bin/carddisp.pl?gene=ACTG2">https://www.genecards.org/cgi-bin/carddisp.pl?gene=ACTG2</a>   |
| COX4I1 | Cytochrome C Oxidase Subunit 4I1                                 | Protein Coding | 44 | GC16P085798 | 1.004889 | <a href="https://www.genecards.org/cgi-bin/carddisp.pl?gene=COX4I1">https://www.genecards.org/cgi-bin/carddisp.pl?gene=COX4I1</a> |
| FLNC   | Filamin C                                                        | Protein Coding | 44 | GC07P128830 | 1.004889 | <a href="https://www.genecards.org/cgi-bin/carddisp.pl?gene=FLNC">https://www.genecards.org/cgi-bin/carddisp.pl?gene=FLNC</a>     |
| GAK    | Cyclin G Associated Kinase                                       | Protein Coding | 44 | GC04M000849 | 1.004889 | <a href="https://www.genecards.org/cgi-bin/carddisp.pl?gene=GAK">https://www.genecards.org/cgi-bin/carddisp.pl?gene=GAK</a>       |
| KCNE1  | Potassium Voltage-Gated Channel Subfamily E Regulatory Subunit 1 | Protein Coding | 44 | GC21M034446 | 1.004889 | <a href="https://www.genecards.org/cgi-bin/carddisp.pl?gene=KCNE1">https://www.genecards.org/cgi-bin/carddisp.pl?gene=KCNE1</a>   |
| KMT2A  | Lysine Methyltransferase 2A                                      | Protein Coding | 44 | GC11P118436 | 1.004889 | <a href="https://www.genecards.org/cgi-bin/carddisp.pl?gene=KMT2A">https://www.genecards.org/cgi-bin/carddisp.pl?gene=KMT2A</a>   |
| HSPA6  | Heat Shock Protein Family A (Hsp70) Member 6                     | Protein Coding | 43 | GC01P161524 | 1.004889 | <a href="https://www.genecards.org/cgi-bin/carddisp.pl?gene=HSPA6">https://www.genecards.org/cgi-bin/carddisp.pl?gene=HSPA6</a>   |
| KIF23  | Kinesin Family Member 23                                         | Protein Coding | 43 | GC15P069414 | 1.004889 | <a href="https://www.genecards.org/cgi-bin/carddisp.pl?gene=KIF23">https://www.genecards.org/cgi-bin/carddisp.pl?gene=KIF23</a>   |
| ABCG1  | ATP Binding Cassette Subfamily G Member 1                        | Protein Coding | 42 | GC21P042199 | 1.004889 | <a href="https://www.genecards.org/cgi-bin/carddisp.pl?gene=ABCG1">https://www.genecards.org/cgi-bin/carddisp.pl?gene=ABCG1</a>   |
| BEST1  | Bestrophin 1                                                     | Protein Coding | 42 | GC11P061949 | 1.004889 | <a href="https://www.genecards.org/cgi-">https://www.genecards.org/cgi-</a>                                                       |

|          |                                                                                                                            |                |    |             |          |                                                                                                                                       |
|----------|----------------------------------------------------------------------------------------------------------------------------|----------------|----|-------------|----------|---------------------------------------------------------------------------------------------------------------------------------------|
|          |                                                                                                                            |                |    |             |          | <a href="http://bin/carddisp.pl?gene=BEST1">bin/carddisp.pl?gene=BEST1</a>                                                            |
| CDK12    | Cyclin Dependent Kinase 12                                                                                                 | Protein Coding | 42 | GC17P039461 | 1.004889 | <a href="https://www.genecards.org/cgi-bin/carddisp.pl?gene=CDK12">https://www.genecards.org/cgi-bin/carddisp.pl?gene=CDK12</a>       |
| CELF2    | CUGBP Elav-Like Family Member 2                                                                                            | Protein Coding | 42 | GC10P010462 | 1.004889 | <a href="https://www.genecards.org/cgi-bin/carddisp.pl?gene=CELF2">https://www.genecards.org/cgi-bin/carddisp.pl?gene=CELF2</a>       |
| CTDP1    | CTD Phosphatase Subunit 1                                                                                                  | Protein Coding | 42 | GC18P079679 | 1.004889 | <a href="https://www.genecards.org/cgi-bin/carddisp.pl?gene=CTDP1">https://www.genecards.org/cgi-bin/carddisp.pl?gene=CTDP1</a>       |
| CYP2U1   | Cytochrome P450 Family 2 Subfamily U Member 1                                                                              | Protein Coding | 42 | GC04P107931 | 1.004889 | <a href="https://www.genecards.org/cgi-bin/carddisp.pl?gene=CYP2U1">https://www.genecards.org/cgi-bin/carddisp.pl?gene=CYP2U1</a>     |
| GART     | Phosphoribosylglycinamide Formyltransferase, Phosphoribosylglycinamide Synthetase, Phosphoribosylaminoimidazole Synthetase | Protein Coding | 42 | GC21M033503 | 1.004889 | <a href="https://www.genecards.org/cgi-bin/carddisp.pl?gene=GART">https://www.genecards.org/cgi-bin/carddisp.pl?gene=GART</a>         |
| MAPKAPK5 | MAPK Activated Protein Kinase 5                                                                                            | Protein Coding | 42 | GC12P111842 | 1.004889 | <a href="https://www.genecards.org/cgi-bin/carddisp.pl?gene=MAPKAPK5">https://www.genecards.org/cgi-bin/carddisp.pl?gene=MAPKAPK5</a> |
| TCF7     | Transcription Factor 7                                                                                                     | Protein Coding | 42 | GC05P134114 | 1.004889 | <a href="https://www.genecards.org/cgi-bin/carddisp.pl?gene=TCF7">https://www.genecards.org/cgi-bin/carddisp.pl?gene=TCF7</a>         |
| TLE1     | TLE Family Member 1, Transcriptional Corepressor                                                                           | Protein Coding | 42 | GC09M081583 | 1.004889 | <a href="https://www.genecards.org/cgi-bin/carddisp.pl?gene=TLE1">https://www.genecards.org/cgi-bin/carddisp.pl?gene=TLE1</a>         |
| TLE3     | TLE Family Member 3, Transcriptional Corepressor                                                                           | Protein Coding | 42 | GC15M070047 | 1.004889 | <a href="https://www.genecards.org/cgi-bin/carddisp.pl?gene=TLE3">https://www.genecards.org/cgi-bin/carddisp.pl?gene=TLE3</a>         |
| ARHGAP4  | Rho GTPase Activating Protein 4                                                                                            | Protein Coding | 41 | GC0XM153907 | 1.004889 | <a href="https://www.genecards.org/cgi-bin/carddisp.pl?gene=ARHGAP4">https://www.genecards.org/cgi-bin/carddisp.pl?gene=ARHGAP4</a>   |
| BRAP     | BRCA1 Associated Protein                                                                                                   | Protein Coding | 41 | GC12M111642 | 1.004889 | <a href="https://www.genecards.org/cgi-bin/carddisp.pl?gene=BRAP">https://www.genecards.org/cgi-bin/carddisp.pl?gene=BRAP</a>         |
| CPA4     | Carboxypeptidase A4                                                                                                        | Protein Coding | 41 | GC07P130293 | 1.004889 | <a href="https://www.genecards.org/cgi-bin/carddisp.pl?gene=CPA4">https://www.genecards.org/cgi-bin/carddisp.pl?gene=CPA4</a>         |
| CRB2     | Crumbs Cell Polarity Complex Component 2                                                                                   | Protein Coding | 41 | GC09P123356 | 1.004889 | <a href="https://www.genecards.org/cgi-">https://www.genecards.org/cgi-</a>                                                           |

|          |                                                   |                |    |             |          |                                                                                                                                       |
|----------|---------------------------------------------------|----------------|----|-------------|----------|---------------------------------------------------------------------------------------------------------------------------------------|
|          |                                                   |                |    |             |          | <a href="https://www.genecards.org/cgi-bin/carddisp.pl?gene=CRB2">bin/carddisp.pl?gene=CRB2</a>                                       |
| DGKQ     | Diacylglycerol Kinase Theta                       | Protein Coding | 41 | GC04M000958 | 1.004889 | <a href="https://www.genecards.org/cgi-bin/carddisp.pl?gene=DGKQ">https://www.genecards.org/cgi-bin/carddisp.pl?gene=DGKQ</a>         |
| FOXF1    | Forkhead Box F1                                   | Protein Coding | 41 | GC16P086510 | 1.004889 | <a href="https://www.genecards.org/cgi-bin/carddisp.pl?gene=FOXF1">https://www.genecards.org/cgi-bin/carddisp.pl?gene=FOXF1</a>       |
| GSTO2    | Glutathione S-Transferase Omega 2                 | Protein Coding | 41 | GC10P104268 | 1.004889 | <a href="https://www.genecards.org/cgi-bin/carddisp.pl?gene=GSTO2">https://www.genecards.org/cgi-bin/carddisp.pl?gene=GSTO2</a>       |
| GTF2IRD1 | GTF2I Repeat Domain Containing 1                  | Protein Coding | 41 | GC07P075437 | 1.004889 | <a href="https://www.genecards.org/cgi-bin/carddisp.pl?gene=GTF2IRD1">https://www.genecards.org/cgi-bin/carddisp.pl?gene=GTF2IRD1</a> |
| IGSF3    | Immunoglobulin Superfamily Member 3               | Protein Coding | 41 | GC01M116574 | 1.004889 | <a href="https://www.genecards.org/cgi-bin/carddisp.pl?gene=IGSF3">https://www.genecards.org/cgi-bin/carddisp.pl?gene=IGSF3</a>       |
| IQGAP1   | IQ Motif Containing GTPase Activating Protein 1   | Protein Coding | 41 | GC15P090388 | 1.004889 | <a href="https://www.genecards.org/cgi-bin/carddisp.pl?gene=IQGAP1">https://www.genecards.org/cgi-bin/carddisp.pl?gene=IQGAP1</a>     |
| LARP7    | La Ribonucleoprotein 7, Transcriptional Regulator | Protein Coding | 41 | GC04P112636 | 1.004889 | <a href="https://www.genecards.org/cgi-bin/carddisp.pl?gene=LARP7">https://www.genecards.org/cgi-bin/carddisp.pl?gene=LARP7</a>       |
| NEUROD2  | Neuronal Differentiation 2                        | Protein Coding | 41 | GC17M039603 | 1.004889 | <a href="https://www.genecards.org/cgi-bin/carddisp.pl?gene=NEUROD2">https://www.genecards.org/cgi-bin/carddisp.pl?gene=NEUROD2</a>   |
| RCAN1    | Regulator Of Calcineurin 1                        | Protein Coding | 41 | GC21M034513 | 1.004889 | <a href="https://www.genecards.org/cgi-bin/carddisp.pl?gene=RCAN1">https://www.genecards.org/cgi-bin/carddisp.pl?gene=RCAN1</a>       |
| SLC4A7   | Solute Carrier Family 4 Member 7                  | Protein Coding | 41 | GC03M027372 | 1.004889 | <a href="https://www.genecards.org/cgi-bin/carddisp.pl?gene=SLC4A7">https://www.genecards.org/cgi-bin/carddisp.pl?gene=SLC4A7</a>     |
| SON      | SON DNA And RNA Binding Protein                   | Protein Coding | 41 | GC21P033542 | 1.004889 | <a href="https://www.genecards.org/cgi-bin/carddisp.pl?gene=SON">https://www.genecards.org/cgi-bin/carddisp.pl?gene=SON</a>           |
| VANGL2   | VANGL Planar Cell Polarity Protein 2              | Protein Coding | 41 | GC01P160400 | 1.004889 | <a href="https://www.genecards.org/cgi-bin/carddisp.pl?gene=VANGL2">https://www.genecards.org/cgi-bin/carddisp.pl?gene=VANGL2</a>     |
| VPS11    | VPS11 Core Subunit Of CORVET And HOPS Complexes   | Protein Coding | 41 | GC11P119067 | 1.004889 | <a href="https://www.genecards.org/cgi-bin/carddisp.pl?gene=VPS11">https://www.genecards.org/cgi-bin/carddisp.pl?gene=VPS11</a>       |

|         |                                                         |                |    |             |          |                                                                                                                                     |
|---------|---------------------------------------------------------|----------------|----|-------------|----------|-------------------------------------------------------------------------------------------------------------------------------------|
| AP4B1   | Adaptor Related Protein Complex 4 Subunit Beta 1        | Protein Coding | 40 | GC01M113894 | 1.004889 | <a href="https://www.genecards.org/cgi-bin/carddisp.pl?gene=AP4B1">https://www.genecards.org/cgi-bin/carddisp.pl?gene=AP4B1</a>     |
| APEH    | Acylaminoacyl-Peptide Hydrolase                         | Protein Coding | 40 | GC03P049673 | 1.004889 | <a href="https://www.genecards.org/cgi-bin/carddisp.pl?gene=APEH">https://www.genecards.org/cgi-bin/carddisp.pl?gene=APEH</a>       |
| ATP6V1F | ATPase H <sup>+</sup> Transporting V1 Subunit F         | Protein Coding | 40 | GC07P128862 | 1.004889 | <a href="https://www.genecards.org/cgi-bin/carddisp.pl?gene=ATP6V1F">https://www.genecards.org/cgi-bin/carddisp.pl?gene=ATP6V1F</a> |
| BACE2   | Beta-Secretase 2                                        | Protein Coding | 40 | GC21P041168 | 1.004889 | <a href="https://www.genecards.org/cgi-bin/carddisp.pl?gene=BACE2">https://www.genecards.org/cgi-bin/carddisp.pl?gene=BACE2</a>     |
| CACNG3  | Calcium Voltage-Gated Channel Auxiliary Subunit Gamma 3 | Protein Coding | 40 | GC16P024309 | 1.004889 | <a href="https://www.genecards.org/cgi-bin/carddisp.pl?gene=CACNG3">https://www.genecards.org/cgi-bin/carddisp.pl?gene=CACNG3</a>   |
| DNMT3L  | DNA Methyltransferase 3 Like                            | Protein Coding | 40 | GC21M044246 | 1.004889 | <a href="https://www.genecards.org/cgi-bin/carddisp.pl?gene=DNMT3L">https://www.genecards.org/cgi-bin/carddisp.pl?gene=DNMT3L</a>   |
| GPC5    | Glypican 5                                              | Protein Coding | 40 | GC13P091398 | 1.004889 | <a href="https://www.genecards.org/cgi-bin/carddisp.pl?gene=GPC5">https://www.genecards.org/cgi-bin/carddisp.pl?gene=GPC5</a>       |
| HS3ST1  | Heparan Sulfate-Glucosamine 3-Sulfotransferase 1        | Protein Coding | 40 | GC04M011394 | 1.004889 | <a href="https://www.genecards.org/cgi-bin/carddisp.pl?gene=HS3ST1">https://www.genecards.org/cgi-bin/carddisp.pl?gene=HS3ST1</a>   |
| ICAM5   | Intercellular Adhesion Molecule 5                       | Protein Coding | 40 | GC19P010289 | 1.004889 | <a href="https://www.genecards.org/cgi-bin/carddisp.pl?gene=ICAM5">https://www.genecards.org/cgi-bin/carddisp.pl?gene=ICAM5</a>     |
| IFT140  | Intraflagellar Transport 140                            | Protein Coding | 40 | GC16M007076 | 1.004889 | <a href="https://www.genecards.org/cgi-bin/carddisp.pl?gene=IFT140">https://www.genecards.org/cgi-bin/carddisp.pl?gene=IFT140</a>   |
| INCENP  | Inner Centromere Protein                                | Protein Coding | 40 | GC11P062142 | 1.004889 | <a href="https://www.genecards.org/cgi-bin/carddisp.pl?gene=INCENP">https://www.genecards.org/cgi-bin/carddisp.pl?gene=INCENP</a>   |
| MSI1    | Musashi RNA Binding Protein 1                           | Protein Coding | 40 | GC12M120341 | 1.004889 | <a href="https://www.genecards.org/cgi-bin/carddisp.pl?gene=MSI1">https://www.genecards.org/cgi-bin/carddisp.pl?gene=MSI1</a>       |
| RENBP   | Renin Binding Protein                                   | Protein Coding | 40 | GC0XM153935 | 1.004889 | <a href="https://www.genecards.org/cgi-bin/carddisp.pl?gene=RENBP">https://www.genecards.org/cgi-bin/carddisp.pl?gene=RENBP</a>     |

|        |                                                            |                |    |             |          |                                                                                                                                   |
|--------|------------------------------------------------------------|----------------|----|-------------|----------|-----------------------------------------------------------------------------------------------------------------------------------|
| SETD1A | SET Domain Containing 1A, Histone Lysine Methyltransferase | Protein Coding | 40 | GC16P041106 | 1.004889 | <a href="https://www.genecards.org/cgi-bin/carddisp.pl?gene=SETD1A">https://www.genecards.org/cgi-bin/carddisp.pl?gene=SETD1A</a> |
| SRCAP  | Snf2 Related CREBBP Activator Protein                      | Protein Coding | 40 | GC16P041094 | 1.004889 | <a href="https://www.genecards.org/cgi-bin/carddisp.pl?gene=SRCAP">https://www.genecards.org/cgi-bin/carddisp.pl?gene=SRCAP</a>   |
| STX4   | Syntaxin 4                                                 | Protein Coding | 40 | GC16P041110 | 1.004889 | <a href="https://www.genecards.org/cgi-bin/carddisp.pl?gene=STX4">https://www.genecards.org/cgi-bin/carddisp.pl?gene=STX4</a>     |
| TRIOBP | TRIO And F-Actin Binding Protein                           | Protein Coding | 40 | GC22P037697 | 1.004889 | <a href="https://www.genecards.org/cgi-bin/carddisp.pl?gene=TRIOBP">https://www.genecards.org/cgi-bin/carddisp.pl?gene=TRIOBP</a> |
| UBE2E3 | Ubiquitin Conjugating Enzyme E2 E3                         | Protein Coding | 40 | GC02P180967 | 1.004889 | <a href="https://www.genecards.org/cgi-bin/carddisp.pl?gene=UBE2E3">https://www.genecards.org/cgi-bin/carddisp.pl?gene=UBE2E3</a> |
| UBE4A  | Ubiquitination Factor E4A                                  | Protein Coding | 40 | GC11P118359 | 1.004889 | <a href="https://www.genecards.org/cgi-bin/carddisp.pl?gene=UBE4A">https://www.genecards.org/cgi-bin/carddisp.pl?gene=UBE4A</a>   |
| VTI1B  | Vesicle Transport Through Interaction With T-SNAREs 1B     | Protein Coding | 40 | GC14M067647 | 1.004889 | <a href="https://www.genecards.org/cgi-bin/carddisp.pl?gene=VTI1B">https://www.genecards.org/cgi-bin/carddisp.pl?gene=VTI1B</a>   |
| XPO5   | Exportin 5                                                 | Protein Coding | 40 | GC06M043522 | 1.004889 | <a href="https://www.genecards.org/cgi-bin/carddisp.pl?gene=XPO5">https://www.genecards.org/cgi-bin/carddisp.pl?gene=XPO5</a>     |
| ZNF143 | Zinc Finger Protein 143                                    | Protein Coding | 40 | GC11P009483 | 1.004889 | <a href="https://www.genecards.org/cgi-bin/carddisp.pl?gene=ZNF143">https://www.genecards.org/cgi-bin/carddisp.pl?gene=ZNF143</a> |
| ABCC10 | ATP Binding Cassette Subfamily C Member 10                 | Protein Coding | 39 | GC06P043427 | 1.004889 | <a href="https://www.genecards.org/cgi-bin/carddisp.pl?gene=ABCC10">https://www.genecards.org/cgi-bin/carddisp.pl?gene=ABCC10</a> |
| CCNT1  | Cyclin T1                                                  | Protein Coding | 39 | GC12M048688 | 1.004889 | <a href="https://www.genecards.org/cgi-bin/carddisp.pl?gene=CCNT1">https://www.genecards.org/cgi-bin/carddisp.pl?gene=CCNT1</a>   |
| KIF3A  | Kinesin Family Member 3A                                   | Protein Coding | 39 | GC05M132689 | 1.004889 | <a href="https://www.genecards.org/cgi-bin/carddisp.pl?gene=KIF3A">https://www.genecards.org/cgi-bin/carddisp.pl?gene=KIF3A</a>   |
| MVP    | Major Vault Protein                                        | Protein Coding | 39 | GC16P041016 | 1.004889 | <a href="https://www.genecards.org/cgi-bin/carddisp.pl?gene=MVP">https://www.genecards.org/cgi-bin/carddisp.pl?gene=MVP</a>       |
| OLIG2  | Oligodendrocyte Transcription Factor 2                     | Protein Coding | 39 | GC21P033025 | 1.004889 | <a href="https://www.genecards.org/cgi-">https://www.genecards.org/cgi-</a>                                                       |

|          |                                            |                |    |             |          |                                                                                                                                       |
|----------|--------------------------------------------|----------------|----|-------------|----------|---------------------------------------------------------------------------------------------------------------------------------------|
|          |                                            |                |    |             |          | <a href="#">bin/carddisp.pl?gene=OLIG2</a>                                                                                            |
| SAR1A    | Secretion Associated Ras Related GTPase 1A | Protein Coding | 39 | GC10M070147 | 1.004889 | <a href="https://www.genecards.org/cgi-bin/carddisp.pl?gene=SAR1A">https://www.genecards.org/cgi-bin/carddisp.pl?gene=SAR1A</a>       |
| SLC35B2  | Solute Carrier Family 35 Member B2         | Protein Coding | 39 | GC06M044254 | 1.004889 | <a href="https://www.genecards.org/cgi-bin/carddisp.pl?gene=SLC35B2">https://www.genecards.org/cgi-bin/carddisp.pl?gene=SLC35B2</a>   |
| SWAP70   | Switching B Cell Complex Subunit SWAP70    | Protein Coding | 39 | GC11P009664 | 1.004889 | <a href="https://www.genecards.org/cgi-bin/carddisp.pl?gene=SWAP70">https://www.genecards.org/cgi-bin/carddisp.pl?gene=SWAP70</a>     |
| TET3     | Tet Methylcytosine Dioxygenase 3           | Protein Coding | 39 | GC02P073986 | 1.004889 | <a href="https://www.genecards.org/cgi-bin/carddisp.pl?gene=TET3">https://www.genecards.org/cgi-bin/carddisp.pl?gene=TET3</a>         |
| USP6NL   | USP6 N-Terminal Like                       | Protein Coding | 39 | GC10M011453 | 1.004889 | <a href="https://www.genecards.org/cgi-bin/carddisp.pl?gene=USP6NL">https://www.genecards.org/cgi-bin/carddisp.pl?gene=USP6NL</a>     |
| UTS2     | Urotensin 2                                | Protein Coding | 39 | GC01M007843 | 1.004889 | <a href="https://www.genecards.org/cgi-bin/carddisp.pl?gene=UTS2">https://www.genecards.org/cgi-bin/carddisp.pl?gene=UTS2</a>         |
| BMP2K    | BMP2 Inducible Kinase                      | Protein Coding | 38 | GC04P078776 | 1.004889 | <a href="https://www.genecards.org/cgi-bin/carddisp.pl?gene=BMP2K">https://www.genecards.org/cgi-bin/carddisp.pl?gene=BMP2K</a>       |
| CAPN11   | Calpain 11                                 | Protein Coding | 38 | GC06P083931 | 1.004889 | <a href="https://www.genecards.org/cgi-bin/carddisp.pl?gene=CAPN11">https://www.genecards.org/cgi-bin/carddisp.pl?gene=CAPN11</a>     |
| CDC42EP3 | CDC42 Effector Protein 3                   | Protein Coding | 38 | GC02M037641 | 1.004889 | <a href="https://www.genecards.org/cgi-bin/carddisp.pl?gene=CDC42EP3">https://www.genecards.org/cgi-bin/carddisp.pl?gene=CDC42EP3</a> |
| CLIC6    | Chloride Intracellular Channel 6           | Protein Coding | 38 | GC21P034671 | 1.004889 | <a href="https://www.genecards.org/cgi-bin/carddisp.pl?gene=CLIC6">https://www.genecards.org/cgi-bin/carddisp.pl?gene=CLIC6</a>       |
| DAP      | Death Associated Protein                   | Protein Coding | 38 | GC05M010679 | 1.004889 | <a href="https://www.genecards.org/cgi-bin/carddisp.pl?gene=DAP">https://www.genecards.org/cgi-bin/carddisp.pl?gene=DAP</a>           |
| DCTN4    | Dynactin Subunit 4                         | Protein Coding | 38 | GC05M150708 | 1.004889 | <a href="https://www.genecards.org/cgi-bin/carddisp.pl?gene=DCTN4">https://www.genecards.org/cgi-bin/carddisp.pl?gene=DCTN4</a>       |
| DDX23    | DEAD-Box Helicase 23                       | Protein Coding | 38 | GC12M048829 | 1.004889 | <a href="https://www.genecards.org/cgi-bin/carddisp.pl?gene=DDX23">https://www.genecards.org/cgi-bin/carddisp.pl?gene=DDX23</a>       |

|          |                                                      |                |    |             |          |                                                                                                                                       |
|----------|------------------------------------------------------|----------------|----|-------------|----------|---------------------------------------------------------------------------------------------------------------------------------------|
| DNASE1L1 | Deoxyribonuclease 1 Like 1                           | Protein Coding | 38 | GC0XM154401 | 1.004889 | <a href="https://www.genecards.org/cgi-bin/carddisp.pl?gene=DNASE1L1">https://www.genecards.org/cgi-bin/carddisp.pl?gene=DNASE1L1</a> |
| DNMBP    | Dynamin Binding Protein                              | Protein Coding | 38 | GC10M099875 | 1.004889 | <a href="https://www.genecards.org/cgi-bin/carddisp.pl?gene=DNMBP">https://www.genecards.org/cgi-bin/carddisp.pl?gene=DNMBP</a>       |
| EIF3D    | Eukaryotic Translation Initiation Factor 3 Subunit D | Protein Coding | 38 | GC22M036510 | 1.004889 | <a href="https://www.genecards.org/cgi-bin/carddisp.pl?gene=EIF3D">https://www.genecards.org/cgi-bin/carddisp.pl?gene=EIF3D</a>       |
| EXOC2    | Exocyst Complex Component 2                          | Protein Coding | 38 | GC06M000485 | 1.004889 | <a href="https://www.genecards.org/cgi-bin/carddisp.pl?gene=EXOC2">https://www.genecards.org/cgi-bin/carddisp.pl?gene=EXOC2</a>       |
| FIGNL1   | Fidgetin Like 1                                      | Protein Coding | 38 | GC07M050444 | 1.004889 | <a href="https://www.genecards.org/cgi-bin/carddisp.pl?gene=FIGNL1">https://www.genecards.org/cgi-bin/carddisp.pl?gene=FIGNL1</a>     |
| GTPBP2   | GTP Binding Protein 2                                | Protein Coding | 38 | GC06M043605 | 1.004889 | <a href="https://www.genecards.org/cgi-bin/carddisp.pl?gene=GTPBP2">https://www.genecards.org/cgi-bin/carddisp.pl?gene=GTPBP2</a>     |
| LZTS1    | Leucine Zipper Tumor Suppressor 1                    | Protein Coding | 38 | GC08M020246 | 1.004889 | <a href="https://www.genecards.org/cgi-bin/carddisp.pl?gene=LZTS1">https://www.genecards.org/cgi-bin/carddisp.pl?gene=LZTS1</a>       |
| NAB1     | NGFI-A Binding Protein 1                             | Protein Coding | 38 | GC02P190646 | 1.004889 | <a href="https://www.genecards.org/cgi-bin/carddisp.pl?gene=NAB1">https://www.genecards.org/cgi-bin/carddisp.pl?gene=NAB1</a>         |
| NLRX1    | NLR Family Member X1                                 | Protein Coding | 38 | GC11P119166 | 1.004889 | <a href="https://www.genecards.org/cgi-bin/carddisp.pl?gene=NLRX1">https://www.genecards.org/cgi-bin/carddisp.pl?gene=NLRX1</a>       |
| NUP88    | Nucleoporin 88                                       | Protein Coding | 38 | GC17M006177 | 1.004889 | <a href="https://www.genecards.org/cgi-bin/carddisp.pl?gene=NUP88">https://www.genecards.org/cgi-bin/carddisp.pl?gene=NUP88</a>       |
| P2RY10   | P2Y Receptor Family Member 10                        | Protein Coding | 38 | GC0XP078945 | 1.004889 | <a href="https://www.genecards.org/cgi-bin/carddisp.pl?gene=P2RY10">https://www.genecards.org/cgi-bin/carddisp.pl?gene=P2RY10</a>     |
| PARD6G   | Par-6 Family Cell Polarity Regulator Gamma           | Protein Coding | 38 | GC18M080157 | 1.004889 | <a href="https://www.genecards.org/cgi-bin/carddisp.pl?gene=PARD6G">https://www.genecards.org/cgi-bin/carddisp.pl?gene=PARD6G</a>     |
| PDC      | Phosducin                                            | Protein Coding | 38 | GC01M186412 | 1.004889 | <a href="https://www.genecards.org/cgi-bin/carddisp.pl?gene=PDC">https://www.genecards.org/cgi-bin/carddisp.pl?gene=PDC</a>           |
| PINX1    | PIN2 (TERF1) Interacting Telomerase Inhibitor 1      | Protein Coding | 38 | GC08M010764 | 1.004889 | <a href="https://www.genecards.org/cgi-bin/carddisp.pl?gene=PINX1">https://www.genecards.org/cgi-bin/carddisp.pl?gene=PINX1</a>       |

|         |                                                     |                |    |             |          |                                                                                                                                     |
|---------|-----------------------------------------------------|----------------|----|-------------|----------|-------------------------------------------------------------------------------------------------------------------------------------|
|         |                                                     |                |    |             |          | <a href="#">bin/carddisp.pl?gene=PINX1</a>                                                                                          |
| PPIL3   | Peptidylprolyl Isomerase Like 3                     | Protein Coding | 38 | GC02M200870 | 1.004889 | <a href="https://www.genecards.org/cgi-bin/carddisp.pl?gene=PPIL3">https://www.genecards.org/cgi-bin/carddisp.pl?gene=PPIL3</a>     |
| RNF40   | Ring Finger Protein 40                              | Protein Coding | 38 | GC16P041101 | 1.004889 | <a href="https://www.genecards.org/cgi-bin/carddisp.pl?gene=RNF40">https://www.genecards.org/cgi-bin/carddisp.pl?gene=RNF40</a>     |
| SBF2    | SET Binding Factor 2                                | Protein Coding | 38 | GC11M009797 | 1.004889 | <a href="https://www.genecards.org/cgi-bin/carddisp.pl?gene=SBF2">https://www.genecards.org/cgi-bin/carddisp.pl?gene=SBF2</a>       |
| SLC36A1 | Solute Carrier Family 36 Member 1                   | Protein Coding | 38 | GC05P151344 | 1.004889 | <a href="https://www.genecards.org/cgi-bin/carddisp.pl?gene=SLC36A1">https://www.genecards.org/cgi-bin/carddisp.pl?gene=SLC36A1</a> |
| SLC9A9  | Solute Carrier Family 9 Member A9                   | Protein Coding | 38 | GC03M143265 | 1.004889 | <a href="https://www.genecards.org/cgi-bin/carddisp.pl?gene=SLC9A9">https://www.genecards.org/cgi-bin/carddisp.pl?gene=SLC9A9</a>   |
| USP19   | Ubiquitin Specific Peptidase 19                     | Protein Coding | 38 | GC03M051164 | 1.004889 | <a href="https://www.genecards.org/cgi-bin/carddisp.pl?gene=USP19">https://www.genecards.org/cgi-bin/carddisp.pl?gene=USP19</a>     |
| WTAP    | WT1 Associated Protein                              | Protein Coding | 38 | GC06P159725 | 1.004889 | <a href="https://www.genecards.org/cgi-bin/carddisp.pl?gene=WTAP">https://www.genecards.org/cgi-bin/carddisp.pl?gene=WTAP</a>       |
| ZNF638  | Zinc Finger Protein 638                             | Protein Coding | 38 | GC02P071276 | 1.004889 | <a href="https://www.genecards.org/cgi-bin/carddisp.pl?gene=ZNF638">https://www.genecards.org/cgi-bin/carddisp.pl?gene=ZNF638</a>   |
| ADO     | 2-Aminoethanethiol Dioxygenase                      | Protein Coding | 37 | GC10P062804 | 1.004889 | <a href="https://www.genecards.org/cgi-bin/carddisp.pl?gene=ADO">https://www.genecards.org/cgi-bin/carddisp.pl?gene=ADO</a>         |
| AIFM2   | Apoptosis Inducing Factor Mitochondria Associated 2 | Protein Coding | 37 | GC10M070098 | 1.004889 | <a href="https://www.genecards.org/cgi-bin/carddisp.pl?gene=AIFM2">https://www.genecards.org/cgi-bin/carddisp.pl?gene=AIFM2</a>     |
| ATP10B  | ATPase Phospholipid Transporting 10B (Putative)     | Protein Coding | 37 | GC05M160499 | 1.004889 | <a href="https://www.genecards.org/cgi-bin/carddisp.pl?gene=ATP10B">https://www.genecards.org/cgi-bin/carddisp.pl?gene=ATP10B</a>   |
| ATP9B   | ATPase Phospholipid Transporting 9B (Putative)      | Protein Coding | 37 | GC18P079069 | 1.004889 | <a href="https://www.genecards.org/cgi-bin/carddisp.pl?gene=ATP9B">https://www.genecards.org/cgi-bin/carddisp.pl?gene=ATP9B</a>     |
| BOLA3   | BolA Family Member 3                                | Protein Coding | 37 | GC02M074136 | 1.004889 | <a href="https://www.genecards.org/cgi-bin/carddisp.pl?gene=BOLA3">https://www.genecards.org/cgi-bin/carddisp.pl?gene=BOLA3</a>     |



|         |                                                                       |                |    |             |          |                                                                                                                                     |
|---------|-----------------------------------------------------------------------|----------------|----|-------------|----------|-------------------------------------------------------------------------------------------------------------------------------------|
| CTR9    | CTR9 Homolog, Paf1/RNA Polymerase II Complex Component                | Protein Coding | 37 | GC11P010772 | 1.004889 | <a href="https://www.genecards.org/cgi-bin/carddisp.pl?gene=CTR9">https://www.genecards.org/cgi-bin/carddisp.pl?gene=CTR9</a>       |
| DENND1A | DENN Domain Containing 1A                                             | Protein Coding | 37 | GC09M123379 | 1.004889 | <a href="https://www.genecards.org/cgi-bin/carddisp.pl?gene=DENND1A">https://www.genecards.org/cgi-bin/carddisp.pl?gene=DENND1A</a> |
| FIS1    | Fission, Mitochondrial 1                                              | Protein Coding | 37 | GC07M101239 | 1.004889 | <a href="https://www.genecards.org/cgi-bin/carddisp.pl?gene=FIS1">https://www.genecards.org/cgi-bin/carddisp.pl?gene=FIS1</a>       |
| GATAD1  | GATA Zinc Finger Domain Containing 1                                  | Protein Coding | 37 | GC07P092447 | 1.004889 | <a href="https://www.genecards.org/cgi-bin/carddisp.pl?gene=GATAD1">https://www.genecards.org/cgi-bin/carddisp.pl?gene=GATAD1</a>   |
| GGA2    | Golgi Associated, Gamma Adaptin Ear Containing, ARF Binding Protein 2 | Protein Coding | 37 | GC16M023464 | 1.004889 | <a href="https://www.genecards.org/cgi-bin/carddisp.pl?gene=GGA2">https://www.genecards.org/cgi-bin/carddisp.pl?gene=GGA2</a>       |
| GJA10   | Gap Junction Protein Alpha 10                                         | Protein Coding | 37 | GC06P089894 | 1.004889 | <a href="https://www.genecards.org/cgi-bin/carddisp.pl?gene=GJA10">https://www.genecards.org/cgi-bin/carddisp.pl?gene=GJA10</a>     |
| GPSM1   | G Protein Signaling Modulator 1                                       | Protein Coding | 37 | GC09P136327 | 1.004889 | <a href="https://www.genecards.org/cgi-bin/carddisp.pl?gene=GPSM1">https://www.genecards.org/cgi-bin/carddisp.pl?gene=GPSM1</a>     |
| MOB1A   | MOB Kinase Activator 1A                                               | Protein Coding | 37 | GC02M074152 | 1.004889 | <a href="https://www.genecards.org/cgi-bin/carddisp.pl?gene=MOB1A">https://www.genecards.org/cgi-bin/carddisp.pl?gene=MOB1A</a>     |
| MYO1B   | Myosin IB                                                             | Protein Coding | 37 | GC02P191246 | 1.004889 | <a href="https://www.genecards.org/cgi-bin/carddisp.pl?gene=MYO1B">https://www.genecards.org/cgi-bin/carddisp.pl?gene=MYO1B</a>     |
| NEUROG2 | Neurogenin 2                                                          | Protein Coding | 37 | GC04M112513 | 1.004889 | <a href="https://www.genecards.org/cgi-bin/carddisp.pl?gene=NEUROG2">https://www.genecards.org/cgi-bin/carddisp.pl?gene=NEUROG2</a> |
| NUDT12  | Nudix Hydrolase 12                                                    | Protein Coding | 37 | GC05M103548 | 1.004889 | <a href="https://www.genecards.org/cgi-bin/carddisp.pl?gene=NUDT12">https://www.genecards.org/cgi-bin/carddisp.pl?gene=NUDT12</a>   |
| OLIG1   | Oligodendrocyte Transcription Factor 1                                | Protein Coding | 37 | GC21P033070 | 1.004889 | <a href="https://www.genecards.org/cgi-bin/carddisp.pl?gene=OLIG1">https://www.genecards.org/cgi-bin/carddisp.pl?gene=OLIG1</a>     |
| PDXP    | Pyridoxal Phosphatase                                                 | Protein Coding | 37 | GC22P037658 | 1.004889 | <a href="https://www.genecards.org/cgi-bin/carddisp.pl?gene=PDXP">https://www.genecards.org/cgi-bin/carddisp.pl?gene=PDXP</a>       |
| POLR2G  | RNA Polymerase II Subunit G                                           | Protein Coding | 37 | GC11P062784 | 1.004889 | <a href="https://www.genecards.org/cgi-bin/carddisp.pl?gene=POLR2G">https://www.genecards.org/cgi-bin/carddisp.pl?gene=POLR2G</a>   |

|         |                                                    |                |    |             |          |                                                                                                                                     |
|---------|----------------------------------------------------|----------------|----|-------------|----------|-------------------------------------------------------------------------------------------------------------------------------------|
|         |                                                    |                |    |             |          | <a href="#">bin/carddisp.pl?gene=POLR2G</a>                                                                                         |
| PIIP5K2 | Diphosphoinositol Pentakisphosphate Kinase 2       | Protein Coding | 37 | GC05P103120 | 1.004889 | <a href="https://www.genecards.org/cgi-bin/carddisp.pl?gene=PIIP5K2">https://www.genecards.org/cgi-bin/carddisp.pl?gene=PIIP5K2</a> |
| PSMD5   | Proteasome 26S Subunit, Non-ATPase 5               | Protein Coding | 37 | GC09M120815 | 1.004889 | <a href="https://www.genecards.org/cgi-bin/carddisp.pl?gene=PSMD5">https://www.genecards.org/cgi-bin/carddisp.pl?gene=PSMD5</a>     |
| RAPGEF6 | Rap Guanine Nucleotide Exchange Factor 6           | Protein Coding | 37 | GC05M131423 | 1.004889 | <a href="https://www.genecards.org/cgi-bin/carddisp.pl?gene=RAPGEF6">https://www.genecards.org/cgi-bin/carddisp.pl?gene=RAPGEF6</a> |
| RBFOX1  | RNA Binding Fox-1 Homolog 1                        | Protein Coding | 37 | GC16P011816 | 1.004889 | <a href="https://www.genecards.org/cgi-bin/carddisp.pl?gene=RBFOX1">https://www.genecards.org/cgi-bin/carddisp.pl?gene=RBFOX1</a>   |
| RSL1D1  | Ribosomal L1 Domain Containing 1                   | Protein Coding | 37 | GC16M011833 | 1.004889 | <a href="https://www.genecards.org/cgi-bin/carddisp.pl?gene=RSL1D1">https://www.genecards.org/cgi-bin/carddisp.pl?gene=RSL1D1</a>   |
| SESN3   | Sestrin 3                                          | Protein Coding | 37 | GC11M096560 | 1.004889 | <a href="https://www.genecards.org/cgi-bin/carddisp.pl?gene=SESN3">https://www.genecards.org/cgi-bin/carddisp.pl?gene=SESN3</a>     |
| SLC26A1 | Solute Carrier Family 26 Member 1                  | Protein Coding | 37 | GC04M001530 | 1.004889 | <a href="https://www.genecards.org/cgi-bin/carddisp.pl?gene=SLC26A1">https://www.genecards.org/cgi-bin/carddisp.pl?gene=SLC26A1</a> |
| SMG7    | SMG7 Nonsense Mediated mRNA Decay Factor           | Protein Coding | 37 | GC01P183441 | 1.004889 | <a href="https://www.genecards.org/cgi-bin/carddisp.pl?gene=SMG7">https://www.genecards.org/cgi-bin/carddisp.pl?gene=SMG7</a>       |
| SNAPC4  | Small Nuclear RNA Activating Complex Polypeptide 4 | Protein Coding | 37 | GC09M136375 | 1.004889 | <a href="https://www.genecards.org/cgi-bin/carddisp.pl?gene=SNAPC4">https://www.genecards.org/cgi-bin/carddisp.pl?gene=SNAPC4</a>   |
| SSBP3   | Single Stranded DNA Binding Protein 3              | Protein Coding | 37 | GC01M054225 | 1.004889 | <a href="https://www.genecards.org/cgi-bin/carddisp.pl?gene=SSBP3">https://www.genecards.org/cgi-bin/carddisp.pl?gene=SSBP3</a>     |
| TPCN2   | Two Pore Segment Channel 2                         | Protein Coding | 37 | GC11P070233 | 1.004889 | <a href="https://www.genecards.org/cgi-bin/carddisp.pl?gene=TPCN2">https://www.genecards.org/cgi-bin/carddisp.pl?gene=TPCN2</a>     |
| ADGRA3  | Adhesion G Protein-Coupled Receptor A3             | Protein Coding | 36 | GC04M022345 | 1.004889 | <a href="https://www.genecards.org/cgi-bin/carddisp.pl?gene=ADGRA3">https://www.genecards.org/cgi-bin/carddisp.pl?gene=ADGRA3</a>   |
| AUP1    | AUP1 Lipid Droplet Regulating VLDL Assembly Factor | Protein Coding | 36 | GC02M074526 | 1.004889 | <a href="https://www.genecards.org/cgi-bin/carddisp.pl?gene=AUP1">https://www.genecards.org/cgi-bin/carddisp.pl?gene=AUP1</a>       |

|         |                                                               |                |    |             |          |                                                                                                                                     |
|---------|---------------------------------------------------------------|----------------|----|-------------|----------|-------------------------------------------------------------------------------------------------------------------------------------|
| BOLL    | Boule Homolog, RNA Binding Protein                            | Protein Coding | 36 | GC02M197726 | 1.004889 | <a href="https://www.genecards.org/cgi-bin/carddisp.pl?gene=BOLL">https://www.genecards.org/cgi-bin/carddisp.pl?gene=BOLL</a>       |
| CEP68   | Centrosomal Protein 68                                        | Protein Coding | 36 | GC02P065056 | 1.004889 | <a href="https://www.genecards.org/cgi-bin/carddisp.pl?gene=CEP68">https://www.genecards.org/cgi-bin/carddisp.pl?gene=CEP68</a>     |
| CNTRL   | Centriolin                                                    | Protein Coding | 36 | GC09P121074 | 1.004889 | <a href="https://www.genecards.org/cgi-bin/carddisp.pl?gene=CNTRL">https://www.genecards.org/cgi-bin/carddisp.pl?gene=CNTRL</a>     |
| CSMD3   | CUB And Sushi Multiple Domains 3                              | Protein Coding | 36 | GC08M112223 | 1.004889 | <a href="https://www.genecards.org/cgi-bin/carddisp.pl?gene=CSMD3">https://www.genecards.org/cgi-bin/carddisp.pl?gene=CSMD3</a>     |
| DOK6    | Docking Protein 6                                             | Protein Coding | 36 | GC18P069401 | 1.004889 | <a href="https://www.genecards.org/cgi-bin/carddisp.pl?gene=DOK6">https://www.genecards.org/cgi-bin/carddisp.pl?gene=DOK6</a>       |
| FAM136A | Family With Sequence Similarity 136 Member A                  | Protein Coding | 36 | GC02M070296 | 1.004889 | <a href="https://www.genecards.org/cgi-bin/carddisp.pl?gene=FAM136A">https://www.genecards.org/cgi-bin/carddisp.pl?gene=FAM136A</a> |
| GPR25   | G Protein-Coupled Receptor 25                                 | Protein Coding | 36 | GC01P200872 | 1.004889 | <a href="https://www.genecards.org/cgi-bin/carddisp.pl?gene=GPR25">https://www.genecards.org/cgi-bin/carddisp.pl?gene=GPR25</a>     |
| KCNG2   | Potassium Voltage-Gated Channel Modifier Subfamily G Member 2 | Protein Coding | 36 | GC18P079797 | 1.004889 | <a href="https://www.genecards.org/cgi-bin/carddisp.pl?gene=KCNG2">https://www.genecards.org/cgi-bin/carddisp.pl?gene=KCNG2</a>     |
| KIN     | Kin17 DNA And RNA Binding Protein                             | Protein Coding | 36 | GC10M007750 | 1.004889 | <a href="https://www.genecards.org/cgi-bin/carddisp.pl?gene=KIN">https://www.genecards.org/cgi-bin/carddisp.pl?gene=KIN</a>         |
| NRIP3   | Nuclear Receptor Interacting Protein 3                        | Protein Coding | 36 | GC11M008966 | 1.004889 | <a href="https://www.genecards.org/cgi-bin/carddisp.pl?gene=NRIP3">https://www.genecards.org/cgi-bin/carddisp.pl?gene=NRIP3</a>     |
| RBM22   | RNA Binding Motif Protein 22                                  | Protein Coding | 36 | GC05M150690 | 1.004889 | <a href="https://www.genecards.org/cgi-bin/carddisp.pl?gene=RBM22">https://www.genecards.org/cgi-bin/carddisp.pl?gene=RBM22</a>     |
| RBM6    | RNA Binding Motif Protein 6                                   | Protein Coding | 36 | GC03P049940 | 1.004889 | <a href="https://www.genecards.org/cgi-bin/carddisp.pl?gene=RBM6">https://www.genecards.org/cgi-bin/carddisp.pl?gene=RBM6</a>       |
| RPS25   | Ribosomal Protein S25                                         | Protein Coding | 36 | GC11M119015 | 1.004889 | <a href="https://www.genecards.org/cgi-bin/carddisp.pl?gene=RPS25">https://www.genecards.org/cgi-bin/carddisp.pl?gene=RPS25</a>     |
| RSPH3   | Radial Spoke Head 3                                           | Protein Coding | 36 | GC06M158962 | 1.004889 | <a href="https://www.genecards.org/cgi-bin/carddisp.pl?gene=RSPH3">https://www.genecards.org/cgi-bin/carddisp.pl?gene=RSPH3</a>     |

|        |                                                      |                |    |             |          |                                                                                                                                   |
|--------|------------------------------------------------------|----------------|----|-------------|----------|-----------------------------------------------------------------------------------------------------------------------------------|
|        |                                                      |                |    |             |          | <a href="http://bin/carddisp.pl?gene=RSPH3">bin/carddisp.pl?gene=RSPH3</a>                                                        |
| SEC16A | SEC16 Homolog A, Endoplasmic Reticulum Export Factor | Protein Coding | 36 | GC09M136440 | 1.004889 | <a href="https://www.genecards.org/cgi-bin/carddisp.pl?gene=SEC16A">https://www.genecards.org/cgi-bin/carddisp.pl?gene=SEC16A</a> |
| SLU7   | SLU7 Homolog, Splicing Factor                        | Protein Coding | 36 | GC05M160401 | 1.004889 | <a href="https://www.genecards.org/cgi-bin/carddisp.pl?gene=SLU7">https://www.genecards.org/cgi-bin/carddisp.pl?gene=SLU7</a>     |
| SMC1B  | Structural Maintenance Of Chromosomes 1B             | Protein Coding | 36 | GC22M045344 | 1.004889 | <a href="https://www.genecards.org/cgi-bin/carddisp.pl?gene=SMC1B">https://www.genecards.org/cgi-bin/carddisp.pl?gene=SMC1B</a>   |
| SNX20  | Sorting Nexin 20                                     | Protein Coding | 36 | GC16M050700 | 1.004889 | <a href="https://www.genecards.org/cgi-bin/carddisp.pl?gene=SNX20">https://www.genecards.org/cgi-bin/carddisp.pl?gene=SNX20</a>   |
| UPK2   | Uroplakin 2                                          | Protein Coding | 36 | GC11P118925 | 1.004889 | <a href="https://www.genecards.org/cgi-bin/carddisp.pl?gene=UPK2">https://www.genecards.org/cgi-bin/carddisp.pl?gene=UPK2</a>     |
| ZC3H7A | Zinc Finger CCCH-Type Containing 7A                  | Protein Coding | 36 | GC16M011750 | 1.004889 | <a href="https://www.genecards.org/cgi-bin/carddisp.pl?gene=ZC3H7A">https://www.genecards.org/cgi-bin/carddisp.pl?gene=ZC3H7A</a> |
| FBXW2  | F-Box And WD Repeat Domain Containing 2              | Protein Coding | 35 | GC09M120751 | 1.004889 | <a href="https://www.genecards.org/cgi-bin/carddisp.pl?gene=FBXW2">https://www.genecards.org/cgi-bin/carddisp.pl?gene=FBXW2</a>   |
| FBXW8  | F-Box And WD Repeat Domain Containing 8              | Protein Coding | 35 | GC12P116910 | 1.004889 | <a href="https://www.genecards.org/cgi-bin/carddisp.pl?gene=FBXW8">https://www.genecards.org/cgi-bin/carddisp.pl?gene=FBXW8</a>   |
| NEURL1 | Neuralized E3 Ubiquitin Protein Ligase 1             | Protein Coding | 35 | GC10P103493 | 1.004889 | <a href="https://www.genecards.org/cgi-bin/carddisp.pl?gene=NEURL1">https://www.genecards.org/cgi-bin/carddisp.pl?gene=NEURL1</a> |
| PCGF1  | Polycomb Group Ring Finger 1                         | Protein Coding | 35 | GC02M074505 | 1.004889 | <a href="https://www.genecards.org/cgi-bin/carddisp.pl?gene=PCGF1">https://www.genecards.org/cgi-bin/carddisp.pl?gene=PCGF1</a>   |
| PHLDB1 | Pleckstrin Homology Like Domain Family B Member 1    | Protein Coding | 35 | GC11P118606 | 1.004889 | <a href="https://www.genecards.org/cgi-bin/carddisp.pl?gene=PHLDB1">https://www.genecards.org/cgi-bin/carddisp.pl?gene=PHLDB1</a> |
| RPAIN  | RPA Interacting Protein                              | Protein Coding | 35 | GC17P005419 | 1.004889 | <a href="https://www.genecards.org/cgi-bin/carddisp.pl?gene=RPAIN">https://www.genecards.org/cgi-bin/carddisp.pl?gene=RPAIN</a>   |
| SAMD4A | Sterile Alpha Motif Domain Containing 4A             | Protein Coding | 35 | GC14P054567 | 1.004889 | <a href="https://www.genecards.org/cgi-bin/carddisp.pl?gene=SAMD4A">https://www.genecards.org/cgi-bin/carddisp.pl?gene=SAMD4A</a> |

|         |                                                |                |    |             |          |                                                                                                                                     |
|---------|------------------------------------------------|----------------|----|-------------|----------|-------------------------------------------------------------------------------------------------------------------------------------|
| SDF2L1  | Stromal Cell Derived Factor 2 Like 1           | Protein Coding | 35 | GC22P035927 | 1.004889 | <a href="https://www.genecards.org/cgi-bin/carddisp.pl?gene=SDF2L1">https://www.genecards.org/cgi-bin/carddisp.pl?gene=SDF2L1</a>   |
| SERBP1  | SERPINE1 MRNA Binding Protein 1                | Protein Coding | 35 | GC01M067407 | 1.004889 | <a href="https://www.genecards.org/cgi-bin/carddisp.pl?gene=SERBP1">https://www.genecards.org/cgi-bin/carddisp.pl?gene=SERBP1</a>   |
| STRBP   | Spermatid Perinuclear RNA Binding Protein      | Protein Coding | 35 | GC09M123681 | 1.004889 | <a href="https://www.genecards.org/cgi-bin/carddisp.pl?gene=STRBP">https://www.genecards.org/cgi-bin/carddisp.pl?gene=STRBP</a>     |
| SYTL3   | Synaptotagmin Like 3                           | Protein Coding | 35 | GC06P158644 | 1.004889 | <a href="https://www.genecards.org/cgi-bin/carddisp.pl?gene=SYTL3">https://www.genecards.org/cgi-bin/carddisp.pl?gene=SYTL3</a>     |
| TMEM30B | Transmembrane Protein 30B                      | Protein Coding | 35 | GC14M061277 | 1.004889 | <a href="https://www.genecards.org/cgi-bin/carddisp.pl?gene=TMEM30B">https://www.genecards.org/cgi-bin/carddisp.pl?gene=TMEM30B</a> |
| TRMT112 | TRNA Methyltransferase Activator Subunit 11-2  | Protein Coding | 35 | GC11M064316 | 1.004889 | <a href="https://www.genecards.org/cgi-bin/carddisp.pl?gene=TRMT112">https://www.genecards.org/cgi-bin/carddisp.pl?gene=TRMT112</a> |
| TYSND1  | Trypsin Like Peroxisomal Matrix Peptidase 1    | Protein Coding | 35 | GC10M070137 | 1.004889 | <a href="https://www.genecards.org/cgi-bin/carddisp.pl?gene=TYSND1">https://www.genecards.org/cgi-bin/carddisp.pl?gene=TYSND1</a>   |
| ASB8    | Ankyrin Repeat And SOCS Box Containing 8       | Protein Coding | 34 | GC12M048147 | 1.004889 | <a href="https://www.genecards.org/cgi-bin/carddisp.pl?gene=ASB8">https://www.genecards.org/cgi-bin/carddisp.pl?gene=ASB8</a>       |
| ATG14   | Autophagy Related 14                           | Protein Coding | 34 | GC14M055366 | 1.004889 | <a href="https://www.genecards.org/cgi-bin/carddisp.pl?gene=ATG14">https://www.genecards.org/cgi-bin/carddisp.pl?gene=ATG14</a>     |
| BCL7C   | BAF Chromatin Remodeling Complex Subunit BCL7C | Protein Coding | 34 | GC16M037209 | 1.004889 | <a href="https://www.genecards.org/cgi-bin/carddisp.pl?gene=BCL7C">https://www.genecards.org/cgi-bin/carddisp.pl?gene=BCL7C</a>     |
| BCL9L   | BCL9 Like                                      | Protein Coding | 34 | GC11M118893 | 1.004889 | <a href="https://www.genecards.org/cgi-bin/carddisp.pl?gene=BCL9L">https://www.genecards.org/cgi-bin/carddisp.pl?gene=BCL9L</a>     |
| COL26A1 | Collagen Type XXVI Alpha 1 Chain               | Protein Coding | 34 | GC07P101362 | 1.004889 | <a href="https://www.genecards.org/cgi-bin/carddisp.pl?gene=COL26A1">https://www.genecards.org/cgi-bin/carddisp.pl?gene=COL26A1</a> |
| CPSF7   | Cleavage And Polyadenylation Specific Factor 7 | Protein Coding | 34 | GC11M061402 | 1.004889 | <a href="https://www.genecards.org/cgi-bin/carddisp.pl?gene=CPSF7">https://www.genecards.org/cgi-bin/carddisp.pl?gene=CPSF7</a>     |
| DUSP11  | Dual Specificity Phosphatase 11                | Protein Coding | 34 | GC02M073788 | 1.004889 | <a href="https://www.genecards.org/cgi-">https://www.genecards.org/cgi-</a>                                                         |

|          |                                                                      |                |    |             |          |                                                                                                                                   |
|----------|----------------------------------------------------------------------|----------------|----|-------------|----------|-----------------------------------------------------------------------------------------------------------------------------------|
|          |                                                                      |                |    |             |          | <a href="http://bin/caddisp.pl?gene=DUSP11">bin/caddisp.pl?gene=DUSP11</a>                                                        |
| DYDC1    | DPY30 Domain Containing 1                                            | Protein Coding | 34 | GC10M080336 | 1.004889 | <a href="https://www.genecards.org/cgi-bin/caddisp.pl?gene=DYDC1">https://www.genecards.org/cgi-bin/caddisp.pl?gene=DYDC1</a>     |
| FAM76B   | Family With Sequence Similarity 76 Member B                          | Protein Coding | 34 | GC11M095768 | 1.004889 | <a href="https://www.genecards.org/cgi-bin/caddisp.pl?gene=FAM76B">https://www.genecards.org/cgi-bin/caddisp.pl?gene=FAM76B</a>   |
| GPR174   | G Protein-Coupled Receptor 174                                       | Protein Coding | 34 | GC0XP079170 | 1.004889 | <a href="https://www.genecards.org/cgi-bin/caddisp.pl?gene=GPR174">https://www.genecards.org/cgi-bin/caddisp.pl?gene=GPR174</a>   |
| HORMA D2 | HORMA Domain Containing 2                                            | Protein Coding | 34 | GC22P036840 | 1.004889 | <a href="https://www.genecards.org/cgi-bin/caddisp.pl?gene=HORMAD2">https://www.genecards.org/cgi-bin/caddisp.pl?gene=HORMAD2</a> |
| KCP      | Kielin Cysteine Rich BMP Regulator                                   | Protein Coding | 34 | GC07M128862 | 1.004889 | <a href="https://www.genecards.org/cgi-bin/caddisp.pl?gene=KCP">https://www.genecards.org/cgi-bin/caddisp.pl?gene=KCP</a>         |
| MAGI3    | Membrane Associated Guanylate Kinase, WW And PDZ Domain Containing 3 | Protein Coding | 34 | GC01P113390 | 1.004889 | <a href="https://www.genecards.org/cgi-bin/caddisp.pl?gene=MAGI3">https://www.genecards.org/cgi-bin/caddisp.pl?gene=MAGI3</a>     |
| MRPL34   | Mitochondrial Ribosomal Protein L34                                  | Protein Coding | 34 | GC19P066222 | 1.004889 | <a href="https://www.genecards.org/cgi-bin/caddisp.pl?gene=MRPL34">https://www.genecards.org/cgi-bin/caddisp.pl?gene=MRPL34</a>   |
| MRPL4    | Mitochondrial Ribosomal Protein L4                                   | Protein Coding | 34 | GC19P010251 | 1.004889 | <a href="https://www.genecards.org/cgi-bin/caddisp.pl?gene=MRPL4">https://www.genecards.org/cgi-bin/caddisp.pl?gene=MRPL4</a>     |
| OTUD3    | OTU Deubiquitinase 3                                                 | Protein Coding | 34 | GC01P019881 | 1.004889 | <a href="https://www.genecards.org/cgi-bin/caddisp.pl?gene=OTUD3">https://www.genecards.org/cgi-bin/caddisp.pl?gene=OTUD3</a>     |
| QRICH1   | Glutamine Rich 1                                                     | Protein Coding | 34 | GC03M051163 | 1.004889 | <a href="https://www.genecards.org/cgi-bin/caddisp.pl?gene=QRICH1">https://www.genecards.org/cgi-bin/caddisp.pl?gene=QRICH1</a>   |
| SNAPC1   | Small Nuclear RNA Activating Complex Polypeptide 1                   | Protein Coding | 34 | GC14P061762 | 1.004889 | <a href="https://www.genecards.org/cgi-bin/caddisp.pl?gene=SNAPC1">https://www.genecards.org/cgi-bin/caddisp.pl?gene=SNAPC1</a>   |
| TCTE1    | T-Complex-Associated-Testis-Expressed 1                              | Protein Coding | 34 | GC06M044278 | 1.004889 | <a href="https://www.genecards.org/cgi-bin/caddisp.pl?gene=TCTE1">https://www.genecards.org/cgi-bin/caddisp.pl?gene=TCTE1</a>     |
| TIFA     | TRAF Interacting Protein With Forkhead Associated Domain             | Protein Coding | 34 | GC04M112274 | 1.004889 | <a href="https://www.genecards.org/cgi-bin/caddisp.pl?gene=TIFA">https://www.genecards.org/cgi-bin/caddisp.pl?gene=TIFA</a>       |

|         |                                               |                |    |             |          |                                                                                                                                     |
|---------|-----------------------------------------------|----------------|----|-------------|----------|-------------------------------------------------------------------------------------------------------------------------------------|
| TRIAP1  | TP53 Regulated Inhibitor Of Apoptosis 1       | Protein Coding | 34 | GC12M120443 | 1.004889 | <a href="https://www.genecards.org/cgi-bin/carddisp.pl?gene=TRIAP1">https://www.genecards.org/cgi-bin/carddisp.pl?gene=TRIAP1</a>   |
| TSPAN14 | Tetraspanin 14                                | Protein Coding | 34 | GC10P092360 | 1.004889 | <a href="https://www.genecards.org/cgi-bin/carddisp.pl?gene=TSPAN14">https://www.genecards.org/cgi-bin/carddisp.pl?gene=TSPAN14</a> |
| ZNF366  | Zinc Finger Protein 366                       | Protein Coding | 34 | GC05M073593 | 1.004889 | <a href="https://www.genecards.org/cgi-bin/carddisp.pl?gene=ZNF366">https://www.genecards.org/cgi-bin/carddisp.pl?gene=ZNF366</a>   |
| C5orf15 | Chromosome 5 Open Reading Frame 15            | Protein Coding | 33 | GC05M133955 | 1.004889 | <a href="https://www.genecards.org/cgi-bin/carddisp.pl?gene=C5orf15">https://www.genecards.org/cgi-bin/carddisp.pl?gene=C5orf15</a> |
| CCDC69  | Coiled-Coil Domain Containing 69              | Protein Coding | 33 | GC05M151181 | 1.004889 | <a href="https://www.genecards.org/cgi-bin/carddisp.pl?gene=CCDC69">https://www.genecards.org/cgi-bin/carddisp.pl?gene=CCDC69</a>   |
| CNOT6L  | CCR4-NOT Transcription Complex Subunit 6 Like | Protein Coding | 33 | GC04M077713 | 1.004889 | <a href="https://www.genecards.org/cgi-bin/carddisp.pl?gene=CNOT6L">https://www.genecards.org/cgi-bin/carddisp.pl?gene=CNOT6L</a>   |
| DYDC2   | DPY30 Domain Containing 2                     | Protein Coding | 33 | GC10P080344 | 1.004889 | <a href="https://www.genecards.org/cgi-bin/carddisp.pl?gene=DYDC2">https://www.genecards.org/cgi-bin/carddisp.pl?gene=DYDC2</a>     |
| FOXR1   | Forkhead Box R1                               | Protein Coding | 33 | GC11P118971 | 1.004889 | <a href="https://www.genecards.org/cgi-bin/carddisp.pl?gene=FOXR1">https://www.genecards.org/cgi-bin/carddisp.pl?gene=FOXR1</a>     |
| GPR137  | G Protein-Coupled Receptor 137                | Protein Coding | 33 | GC11P064270 | 1.004889 | <a href="https://www.genecards.org/cgi-bin/carddisp.pl?gene=GPR137">https://www.genecards.org/cgi-bin/carddisp.pl?gene=GPR137</a>   |
| KANSL2  | KAT8 Regulatory NSL Complex Subunit 2         | Protein Coding | 33 | GC12M048653 | 1.004889 | <a href="https://www.genecards.org/cgi-bin/carddisp.pl?gene=KANSL2">https://www.genecards.org/cgi-bin/carddisp.pl?gene=KANSL2</a>   |
| KIF26A  | Kinesin Family Member 26A                     | Protein Coding | 33 | GC14P104138 | 1.004889 | <a href="https://www.genecards.org/cgi-bin/carddisp.pl?gene=KIF26A">https://www.genecards.org/cgi-bin/carddisp.pl?gene=KIF26A</a>   |
| MIER1   | MIER1 Transcriptional Regulator               | Protein Coding | 33 | GC01P066924 | 1.004889 | <a href="https://www.genecards.org/cgi-bin/carddisp.pl?gene=MIER1">https://www.genecards.org/cgi-bin/carddisp.pl?gene=MIER1</a>     |
| NECAB2  | N-Terminal EF-Hand Calcium Binding Protein 2  | Protein Coding | 33 | GC16P083968 | 1.004889 | <a href="https://www.genecards.org/cgi-bin/carddisp.pl?gene=NECAB2">https://www.genecards.org/cgi-bin/carddisp.pl?gene=NECAB2</a>   |
| NHLH1   | Nescient Helix-Loop-Helix 1                   | Protein Coding | 33 | GC01P160367 | 1.004889 | <a href="https://www.genecards.org/cgi-">https://www.genecards.org/cgi-</a>                                                         |

|         |                                                    |                |    |             |          |                                                                                                                                          |
|---------|----------------------------------------------------|----------------|----|-------------|----------|------------------------------------------------------------------------------------------------------------------------------------------|
|         |                                                    |                |    |             |          | <a href="http://www.ncbi.nlm.nih.gov/ncbi/cdd/cdddisp.pl?gene=NHLH1">bin/cdddisp.pl?gene=NHLH1</a>                                       |
| ORAI3   | ORAI Calcium Release-Activated Calcium Modulator 3 | Protein Coding | 33 | GC16P030949 | 1.004889 | <a href="http://www.ncbi.nlm.nih.gov/ncbi/cdd/cdddisp.pl?gene=ORAI3">https://www.ncbi.nlm.nih.gov/ncbi/cdd/cdddisp.pl?gene=ORAI3</a>     |
| RNF186  | Ring Finger Protein 186                            | Protein Coding | 33 | GC01M019814 | 1.004889 | <a href="http://www.ncbi.nlm.nih.gov/ncbi/cdd/cdddisp.pl?gene=RNF186">https://www.ncbi.nlm.nih.gov/ncbi/cdd/cdddisp.pl?gene=RNF186</a>   |
| RPAP3   | RNA Polymerase II Associated Protein 3             | Protein Coding | 33 | GC12M047661 | 1.004889 | <a href="http://www.ncbi.nlm.nih.gov/ncbi/cdd/cdddisp.pl?gene=RPAP3">https://www.ncbi.nlm.nih.gov/ncbi/cdd/cdddisp.pl?gene=RPAP3</a>     |
| SCT     | Secretin                                           | Protein Coding | 33 | GC11M000626 | 1.004889 | <a href="http://www.ncbi.nlm.nih.gov/ncbi/cdd/cdddisp.pl?gene=SCT">https://www.ncbi.nlm.nih.gov/ncbi/cdd/cdddisp.pl?gene=SCT</a>         |
| SEL1L3  | SEL1L Family Member 3                              | Protein Coding | 33 | GC04M025715 | 1.004889 | <a href="http://www.ncbi.nlm.nih.gov/ncbi/cdd/cdddisp.pl?gene=SEL1L3">https://www.ncbi.nlm.nih.gov/ncbi/cdd/cdddisp.pl?gene=SEL1L3</a>   |
| SNN     | Stannin                                            | Protein Coding | 33 | GC16P012203 | 1.004889 | <a href="http://www.ncbi.nlm.nih.gov/ncbi/cdd/cdddisp.pl?gene=SNN">https://www.ncbi.nlm.nih.gov/ncbi/cdd/cdddisp.pl?gene=SNN</a>         |
| TMEM175 | Transmembrane Protein 175                          | Protein Coding | 33 | GC04P000932 | 1.004889 | <a href="http://www.ncbi.nlm.nih.gov/ncbi/cdd/cdddisp.pl?gene=TMEM175">https://www.ncbi.nlm.nih.gov/ncbi/cdd/cdddisp.pl?gene=TMEM175</a> |
| TMEM50B | Transmembrane Protein 50B                          | Protein Coding | 33 | GC21M033432 | 1.004889 | <a href="http://www.ncbi.nlm.nih.gov/ncbi/cdd/cdddisp.pl?gene=TMEM50B">https://www.ncbi.nlm.nih.gov/ncbi/cdd/cdddisp.pl?gene=TMEM50B</a> |
| ZBTB21  | Zinc Finger And BTB Domain Containing 21           | Protein Coding | 33 | GC21M041986 | 1.004889 | <a href="http://www.ncbi.nlm.nih.gov/ncbi/cdd/cdddisp.pl?gene=ZBTB21">https://www.ncbi.nlm.nih.gov/ncbi/cdd/cdddisp.pl?gene=ZBTB21</a>   |
| ZNF641  | Zinc Finger Protein 641                            | Protein Coding | 33 | GC12M049432 | 1.004889 | <a href="http://www.ncbi.nlm.nih.gov/ncbi/cdd/cdddisp.pl?gene=ZNF641">https://www.ncbi.nlm.nih.gov/ncbi/cdd/cdddisp.pl?gene=ZNF641</a>   |
| ZNF689  | Zinc Finger Protein 689                            | Protein Coding | 33 | GC16M030602 | 1.004889 | <a href="http://www.ncbi.nlm.nih.gov/ncbi/cdd/cdddisp.pl?gene=ZNF689">https://www.ncbi.nlm.nih.gov/ncbi/cdd/cdddisp.pl?gene=ZNF689</a>   |
| ZNF764  | Zinc Finger Protein 764                            | Protein Coding | 33 | GC16M030553 | 1.004889 | <a href="http://www.ncbi.nlm.nih.gov/ncbi/cdd/cdddisp.pl?gene=ZNF764">https://www.ncbi.nlm.nih.gov/ncbi/cdd/cdddisp.pl?gene=ZNF764</a>   |
| ADNP2   | ADNP Homeobox 2                                    | Protein Coding | 32 | GC18P080109 | 1.004889 | <a href="http://www.ncbi.nlm.nih.gov/ncbi/cdd/cdddisp.pl?gene=ADNP2">https://www.ncbi.nlm.nih.gov/ncbi/cdd/cdddisp.pl?gene=ADNP2</a>     |



|          |                                                                 |                |    |             |          |                                                                                                                                       |
|----------|-----------------------------------------------------------------|----------------|----|-------------|----------|---------------------------------------------------------------------------------------------------------------------------------------|
| AP1AR    | Adaptor Related Protein Complex 1 Associated Regulatory Protein | Protein Coding | 32 | GC04P112231 | 1.004889 | <a href="https://www.genecards.org/cgi-bin/carddisp.pl?gene=AP1AR">https://www.genecards.org/cgi-bin/carddisp.pl?gene=AP1AR</a>       |
| C2CD2    | C2 Calcium Dependent Domain Containing 2                        | Protein Coding | 32 | GC21M041885 | 1.004889 | <a href="https://www.genecards.org/cgi-bin/carddisp.pl?gene=C2CD2">https://www.genecards.org/cgi-bin/carddisp.pl?gene=C2CD2</a>       |
| CALHM2   | Calcium Homeostasis Modulator Family Member 2                   | Protein Coding | 32 | GC10M103446 | 1.004889 | <a href="https://www.genecards.org/cgi-bin/carddisp.pl?gene=CALHM2">https://www.genecards.org/cgi-bin/carddisp.pl?gene=CALHM2</a>     |
| CAMTA2   | Calmodulin Binding Transcription Activator 2                    | Protein Coding | 32 | GC17M006122 | 1.004889 | <a href="https://www.genecards.org/cgi-bin/carddisp.pl?gene=CAMTA2">https://www.genecards.org/cgi-bin/carddisp.pl?gene=CAMTA2</a>     |
| CYB561A3 | Cytochrome B561 Family Member A3                                | Protein Coding | 32 | GC11M061348 | 1.004889 | <a href="https://www.genecards.org/cgi-bin/carddisp.pl?gene=CYB561A3">https://www.genecards.org/cgi-bin/carddisp.pl?gene=CYB561A3</a> |
| DNAJC28  | DnaJ Heat Shock Protein Family (Hsp40) Member C28               | Protein Coding | 32 | GC21M033485 | 1.004889 | <a href="https://www.genecards.org/cgi-bin/carddisp.pl?gene=DNAJC28">https://www.genecards.org/cgi-bin/carddisp.pl?gene=DNAJC28</a>   |
| FAM98B   | Family With Sequence Similarity 98 Member B                     | Protein Coding | 32 | GC15P038454 | 1.004889 | <a href="https://www.genecards.org/cgi-bin/carddisp.pl?gene=FAM98B">https://www.genecards.org/cgi-bin/carddisp.pl?gene=FAM98B</a>     |
| FBRS     | Fibrosin                                                        | Protein Coding | 32 | GC16P041093 | 1.004889 | <a href="https://www.genecards.org/cgi-bin/carddisp.pl?gene=FBRS">https://www.genecards.org/cgi-bin/carddisp.pl?gene=FBRS</a>         |
| GPR31    | G Protein-Coupled Receptor 31                                   | Protein Coding | 32 | GC06M167156 | 1.004889 | <a href="https://www.genecards.org/cgi-bin/carddisp.pl?gene=GPR31">https://www.genecards.org/cgi-bin/carddisp.pl?gene=GPR31</a>       |
| IFT46    | Intraflagellar Transport 46                                     | Protein Coding | 32 | GC11M118544 | 1.004889 | <a href="https://www.genecards.org/cgi-bin/carddisp.pl?gene=IFT46">https://www.genecards.org/cgi-bin/carddisp.pl?gene=IFT46</a>       |
| INO80B   | INO80 Complex Subunit B                                         | Protein Coding | 32 | GC02P074456 | 1.004889 | <a href="https://www.genecards.org/cgi-bin/carddisp.pl?gene=INO80B">https://www.genecards.org/cgi-bin/carddisp.pl?gene=INO80B</a>     |
| KCTD20   | Potassium Channel Tetramerization Domain Containing 20          | Protein Coding | 32 | GC06P083845 | 1.004889 | <a href="https://www.genecards.org/cgi-bin/carddisp.pl?gene=KCTD20">https://www.genecards.org/cgi-bin/carddisp.pl?gene=KCTD20</a>     |
| PRR14    | Proline Rich 14                                                 | Protein Coding | 32 | GC16P041089 | 1.004889 | <a href="https://www.genecards.org/cgi-bin/carddisp.pl?gene=PRR14">https://www.genecards.org/cgi-bin/carddisp.pl?gene=PRR14</a>       |
| RPP25L   | Ribonuclease P/MRP Subunit P25 Like                             | Protein Coding | 32 | GC09M034610 | 1.004889 | <a href="https://www.genecards.org/cgi-bin/carddisp.pl?gene=RPP25L">https://www.genecards.org/cgi-bin/carddisp.pl?gene=RPP25L</a>     |

|          |                                                    |                |    |             |          |                                                                                                                                     |
|----------|----------------------------------------------------|----------------|----|-------------|----------|-------------------------------------------------------------------------------------------------------------------------------------|
|          |                                                    |                |    |             |          | <a href="http://bin/caddisp.pl?gene=RPP25L">bin/caddisp.pl?gene=RPP25L</a>                                                          |
| SH2D4B   | SH2 Domain Containing 4B                           | Protein Coding | 32 | GC10P092361 | 1.004889 | <a href="https://www.genecards.org/cgi-bin/caddisp.pl?gene=SH2D4B">https://www.genecards.org/cgi-bin/caddisp.pl?gene=SH2D4B</a>     |
| TMEM106C | Transmembrane Protein 106C                         | Protein Coding | 32 | GC12P047963 | 1.004889 | <a href="https://www.genecards.org/cgi-bin/caddisp.pl?gene=TMEM106C">https://www.genecards.org/cgi-bin/caddisp.pl?gene=TMEM106C</a> |
| TMEM204  | Transmembrane Protein 204                          | Protein Coding | 32 | GC16P001528 | 1.004889 | <a href="https://www.genecards.org/cgi-bin/caddisp.pl?gene=TMEM204">https://www.genecards.org/cgi-bin/caddisp.pl?gene=TMEM204</a>   |
| ZNF785   | Zinc Finger Protein 785                            | Protein Coding | 32 | GC16M030573 | 1.004889 | <a href="https://www.genecards.org/cgi-bin/caddisp.pl?gene=ZNF785">https://www.genecards.org/cgi-bin/caddisp.pl?gene=ZNF785</a>     |
| ABHD8    | Abhydrolase Domain Containing 8                    | Protein Coding | 31 | GC19M017292 | 1.004889 | <a href="https://www.genecards.org/cgi-bin/caddisp.pl?gene=ABHD8">https://www.genecards.org/cgi-bin/caddisp.pl?gene=ABHD8</a>       |
| EMSY     | EMSY Transcriptional Repressor, BRCA2 Interacting  | Protein Coding | 31 | GC11P077991 | 1.004889 | <a href="https://www.genecards.org/cgi-bin/caddisp.pl?gene=EMSY">https://www.genecards.org/cgi-bin/caddisp.pl?gene=EMSY</a>         |
| HECTD4   | HECT Domain E3 Ubiquitin Protein Ligase 4          | Protein Coding | 31 | GC12M112160 | 1.004889 | <a href="https://www.genecards.org/cgi-bin/caddisp.pl?gene=HECTD4">https://www.genecards.org/cgi-bin/caddisp.pl?gene=HECTD4</a>     |
| INO80E   | INO80 Complex Subunit E                            | Protein Coding | 31 | GC16P041024 | 1.004889 | <a href="https://www.genecards.org/cgi-bin/caddisp.pl?gene=INO80E">https://www.genecards.org/cgi-bin/caddisp.pl?gene=INO80E</a>     |
| MRPL53   | Mitochondrial Ribosomal Protein L53                | Protein Coding | 31 | GC02M074471 | 1.004889 | <a href="https://www.genecards.org/cgi-bin/caddisp.pl?gene=MRPL53">https://www.genecards.org/cgi-bin/caddisp.pl?gene=MRPL53</a>     |
| OR10AD1  | Olfactory Receptor Family 10 Subfamily AD Member 1 | Protein Coding | 31 | GC12M048201 | 1.004889 | <a href="https://www.genecards.org/cgi-bin/caddisp.pl?gene=OR10AD1">https://www.genecards.org/cgi-bin/caddisp.pl?gene=OR10AD1</a>   |
| PRR12    | Proline Rich 12                                    | Protein Coding | 31 | GC19P049591 | 1.004889 | <a href="https://www.genecards.org/cgi-bin/caddisp.pl?gene=PRR12">https://www.genecards.org/cgi-bin/caddisp.pl?gene=PRR12</a>       |
| ZGRF1    | Zinc Finger GRF-Type Containing 1                  | Protein Coding | 31 | GC04M112539 | 1.004889 | <a href="https://www.genecards.org/cgi-bin/caddisp.pl?gene=ZGRF1">https://www.genecards.org/cgi-bin/caddisp.pl?gene=ZGRF1</a>       |
| ZNF688   | Zinc Finger Protein 688                            | Protein Coding | 31 | GC16M030569 | 1.004889 | <a href="https://www.genecards.org/cgi-bin/caddisp.pl?gene=ZNF688">https://www.genecards.org/cgi-bin/caddisp.pl?gene=ZNF688</a>     |

|           |                                                         |                |    |             |          |                                                                                                                                       |
|-----------|---------------------------------------------------------|----------------|----|-------------|----------|---------------------------------------------------------------------------------------------------------------------------------------|
| BLCAP     | BLCAP Apoptosis Inducing Factor                         | Protein Coding | 30 | GC20M037492 | 1.004889 | <a href="https://www.genecards.org/cgi-bin/carddisp.pl?gene=BLCAP">https://www.genecards.org/cgi-bin/carddisp.pl?gene=BLCAP</a>       |
| CCDC153   | Coiled-Coil Domain Containing 153                       | Protein Coding | 30 | GC11M119207 | 1.004889 | <a href="https://www.genecards.org/cgi-bin/carddisp.pl?gene=CCDC153">https://www.genecards.org/cgi-bin/carddisp.pl?gene=CCDC153</a>   |
| DNAJC4    | DnaJ Heat Shock Protein Family (Hsp40) Member C4        | Protein Coding | 30 | GC11P064230 | 1.004889 | <a href="https://www.genecards.org/cgi-bin/carddisp.pl?gene=DNAJC4">https://www.genecards.org/cgi-bin/carddisp.pl?gene=DNAJC4</a>     |
| IFT22     | Intraflagellar Transport 22                             | Protein Coding | 30 | GC07M101986 | 1.004889 | <a href="https://www.genecards.org/cgi-bin/carddisp.pl?gene=IFT22">https://www.genecards.org/cgi-bin/carddisp.pl?gene=IFT22</a>       |
| PLAC9     | Placenta Associated 9                                   | Protein Coding | 30 | GC10P080131 | 1.004889 | <a href="https://www.genecards.org/cgi-bin/carddisp.pl?gene=PLAC9">https://www.genecards.org/cgi-bin/carddisp.pl?gene=PLAC9</a>       |
| RBFA      | Ribosome Binding Factor A                               | Protein Coding | 30 | GC18P080068 | 1.004889 | <a href="https://www.genecards.org/cgi-bin/carddisp.pl?gene=RBFA">https://www.genecards.org/cgi-bin/carddisp.pl?gene=RBFA</a>         |
| TMEM109   | Transmembrane Protein 109                               | Protein Coding | 30 | GC11P060914 | 1.004889 | <a href="https://www.genecards.org/cgi-bin/carddisp.pl?gene=TMEM109">https://www.genecards.org/cgi-bin/carddisp.pl?gene=TMEM109</a>   |
| ZGLP1     | Zinc Finger GATA Like Protein 1                         | Protein Coding | 30 | GC19M010304 | 1.004889 | <a href="https://www.genecards.org/cgi-bin/carddisp.pl?gene=ZGLP1">https://www.genecards.org/cgi-bin/carddisp.pl?gene=ZGLP1</a>       |
| ANKRD33B  | Ankyrin Repeat Domain 33B                               | Protein Coding | 29 | GC05P010564 | 1.004889 | <a href="https://www.genecards.org/cgi-bin/carddisp.pl?gene=ANKRD33B">https://www.genecards.org/cgi-bin/carddisp.pl?gene=ANKRD33B</a> |
| FAM133B   | Family With Sequence Similarity 133 Member B            | Protein Coding | 29 | GC07M092560 | 1.004889 | <a href="https://www.genecards.org/cgi-bin/carddisp.pl?gene=FAM133B">https://www.genecards.org/cgi-bin/carddisp.pl?gene=FAM133B</a>   |
| SLX1A     | SLX1 Homolog A, Structure-Specific Endonuclease Subunit | Protein Coding | 29 | GC16P041045 | 1.004889 | <a href="https://www.genecards.org/cgi-bin/carddisp.pl?gene=SLX1A">https://www.genecards.org/cgi-bin/carddisp.pl?gene=SLX1A</a>       |
| TMEM151B  | Transmembrane Protein 151B                              | Protein Coding | 29 | GC06P044270 | 1.004889 | <a href="https://www.genecards.org/cgi-bin/carddisp.pl?gene=TMEM151B">https://www.genecards.org/cgi-bin/carddisp.pl?gene=TMEM151B</a> |
| ZNF679    | Zinc Finger Protein 679                                 | Protein Coding | 29 | GC07P064228 | 1.004889 | <a href="https://www.genecards.org/cgi-bin/carddisp.pl?gene=ZNF679">https://www.genecards.org/cgi-bin/carddisp.pl?gene=ZNF679</a>     |
| C14orf180 | Chromosome 14 Open Reading Frame 180                    | Protein Coding | 28 | GC14P104579 | 1.004889 | <a href="https://www.genecards.org/cgi-">https://www.genecards.org/cgi-</a>                                                           |

|           |                                             |                |    |             |          |                                                                                                                                         |
|-----------|---------------------------------------------|----------------|----|-------------|----------|-----------------------------------------------------------------------------------------------------------------------------------------|
|           |                                             |                |    |             |          | <a href="#">bin/carddisp.pl?gene=C14orf180</a>                                                                                          |
| C2orf74   | Chromosome 2 Open Reading Frame 74          | Protein Coding | 28 | GC02P061146 | 1.004889 | <a href="https://www.genecards.org/cgi-bin/carddisp.pl?gene=C2orf74">https://www.genecards.org/cgi-bin/carddisp.pl?gene=C2orf74</a>     |
| CCDC142   | Coiled-Coil Domain Containing 142           | Protein Coding | 28 | GC02M075091 | 1.004889 | <a href="https://www.genecards.org/cgi-bin/carddisp.pl?gene=CCDC142">https://www.genecards.org/cgi-bin/carddisp.pl?gene=CCDC142</a>     |
| DENND2B   | DENN Domain Containing 2B                   | Protein Coding | 28 | GC11M008753 | 1.004889 | <a href="https://www.genecards.org/cgi-bin/carddisp.pl?gene=DENND2B">https://www.genecards.org/cgi-bin/carddisp.pl?gene=DENND2B</a>     |
| DNLZ      | DNL-Type Zinc Finger                        | Protein Coding | 28 | GC09M136359 | 1.004889 | <a href="https://www.genecards.org/cgi-bin/carddisp.pl?gene=DNLZ">https://www.genecards.org/cgi-bin/carddisp.pl?gene=DNLZ</a>           |
| PTX4      | Pentraxin 4                                 | Protein Coding | 28 | GC16M001485 | 1.004889 | <a href="https://www.genecards.org/cgi-bin/carddisp.pl?gene=PTX4">https://www.genecards.org/cgi-bin/carddisp.pl?gene=PTX4</a>           |
| SMIM20    | Small Integral Membrane Protein 20          | Protein Coding | 28 | GC04P025867 | 1.004889 | <a href="https://www.genecards.org/cgi-bin/carddisp.pl?gene=SMIM20">https://www.genecards.org/cgi-bin/carddisp.pl?gene=SMIM20</a>       |
| TMEM179   | Transmembrane Protein 179                   | Protein Coding | 28 | GC14M104477 | 1.004889 | <a href="https://www.genecards.org/cgi-bin/carddisp.pl?gene=TMEM179">https://www.genecards.org/cgi-bin/carddisp.pl?gene=TMEM179</a>     |
| TTC31     | Tetratricopeptide Repeat Domain 31          | Protein Coding | 28 | GC02P074483 | 1.004889 | <a href="https://www.genecards.org/cgi-bin/carddisp.pl?gene=TTC31">https://www.genecards.org/cgi-bin/carddisp.pl?gene=TTC31</a>         |
| ABHD16B   | Abhydrolase Domain Containing 16B           | Protein Coding | 27 | GC20P063861 | 1.004889 | <a href="https://www.genecards.org/cgi-bin/carddisp.pl?gene=ABHD16B">https://www.genecards.org/cgi-bin/carddisp.pl?gene=ABHD16B</a>     |
| ENTR1     | Endosome Associated Trafficking Regulator 1 | Protein Coding | 27 | GC09M136403 | 1.004889 | <a href="https://www.genecards.org/cgi-bin/carddisp.pl?gene=ENTR1">https://www.genecards.org/cgi-bin/carddisp.pl?gene=ENTR1</a>         |
| MACROH2A2 | MacroH2A.2 Histone                          | Protein Coding | 27 | GC10P070053 | 1.004889 | <a href="https://www.genecards.org/cgi-bin/carddisp.pl?gene=MACROH2A2">https://www.genecards.org/cgi-bin/carddisp.pl?gene=MACROH2A2</a> |
| TMEM235   | Transmembrane Protein 235                   | Protein Coding | 27 | GC17P078231 | 1.004889 | <a href="https://www.genecards.org/cgi-bin/carddisp.pl?gene=TMEM235">https://www.genecards.org/cgi-bin/carddisp.pl?gene=TMEM235</a>     |
| CCDC184   | Coiled-Coil Domain Containing 184           | Protein Coding | 26 | GC12P048183 | 1.004889 | <a href="https://www.genecards.org/cgi-bin/carddisp.pl?gene=CCDC184">https://www.genecards.org/cgi-bin/carddisp.pl?gene=CCDC184</a>     |

|           |                                                           |                |    |             |          |                                                                                                                                     |
|-----------|-----------------------------------------------------------|----------------|----|-------------|----------|-------------------------------------------------------------------------------------------------------------------------------------|
| CDHR4     | Cadherin Related Family Member 4                          | Protein Coding | 26 | GC03M049790 | 1.004889 | <a href="https://www.genecards.org/cgi-bin/carddisp.pl?gene=CDHR4">https://www.genecards.org/cgi-bin/carddisp.pl?gene=CDHR4</a>     |
| CYRIB     | CYFIP Related Rac1 Interactor B                           | Protein Coding | 26 | GC08M131809 | 1.004889 | <a href="https://www.genecards.org/cgi-bin/carddisp.pl?gene=CYRIB">https://www.genecards.org/cgi-bin/carddisp.pl?gene=CYRIB</a>     |
| DEFB136   | Defensin Beta 136                                         | Protein Coding | 26 | GC08M011973 | 1.004889 | <a href="https://www.genecards.org/cgi-bin/carddisp.pl?gene=DEFB136">https://www.genecards.org/cgi-bin/carddisp.pl?gene=DEFB136</a> |
| FAM205A   | Family With Sequence Similarity 205 Member A              | Protein Coding | 26 | GC09M034723 | 1.004889 | <a href="https://www.genecards.org/cgi-bin/carddisp.pl?gene=FAM205A">https://www.genecards.org/cgi-bin/carddisp.pl?gene=FAM205A</a> |
| PRXL2A    | Peroxiredoxin Like 2A                                     | Protein Coding | 26 | GC10P093417 | 1.004889 | <a href="https://www.genecards.org/cgi-bin/carddisp.pl?gene=PRXL2A">https://www.genecards.org/cgi-bin/carddisp.pl?gene=PRXL2A</a>   |
| TMEM116   | Transmembrane Protein 116                                 | Protein Coding | 26 | GC12M111894 | 1.004889 | <a href="https://www.genecards.org/cgi-bin/carddisp.pl?gene=TMEM116">https://www.genecards.org/cgi-bin/carddisp.pl?gene=TMEM116</a> |
| PHF24     | PHD Finger Protein 24                                     | Protein Coding | 25 | GC09P047597 | 1.004889 | <a href="https://www.genecards.org/cgi-bin/carddisp.pl?gene=PHF24">https://www.genecards.org/cgi-bin/carddisp.pl?gene=PHF24</a>     |
| HSPA7     | Heat Shock Protein Family A (Hsp70) Member 7 (Pseudogene) | Pseudo gene    | 24 | GC01P161606 | 1.004889 | <a href="https://www.genecards.org/cgi-bin/carddisp.pl?gene=HSPA7">https://www.genecards.org/cgi-bin/carddisp.pl?gene=HSPA7</a>     |
| PRXL2B    | Peroxiredoxin Like 2B                                     | Protein Coding | 24 | GC01P003939 | 1.004889 | <a href="https://www.genecards.org/cgi-bin/carddisp.pl?gene=PRXL2B">https://www.genecards.org/cgi-bin/carddisp.pl?gene=PRXL2B</a>   |
| SANBR     | SANT And BTB Domain Regulator Of CSR                      | Protein Coding | 24 | GC02P061068 | 1.004889 | <a href="https://www.genecards.org/cgi-bin/carddisp.pl?gene=SANBR">https://www.genecards.org/cgi-bin/carddisp.pl?gene=SANBR</a>     |
| CENATA C  | Centrosomal AT-AC Splicing Factor                         | Protein Coding | 23 | GC11P120147 | 1.004889 | <a href="https://www.genecards.org/cgi-bin/carddisp.pl?gene=CENATAC">https://www.genecards.org/cgi-bin/carddisp.pl?gene=CENATAC</a> |
| CLBA1     | Clathrin Binding Box Of Aftiphilin Containing 1           | Protein Coding | 22 | GC14P109741 | 1.004889 | <a href="https://www.genecards.org/cgi-bin/carddisp.pl?gene=CLBA1">https://www.genecards.org/cgi-bin/carddisp.pl?gene=CLBA1</a>     |
| FAM241A   | Family With Sequence Similarity 241 Member A              | Protein Coding | 22 | GC04P112146 | 1.004889 | <a href="https://www.genecards.org/cgi-bin/carddisp.pl?gene=FAM241A">https://www.genecards.org/cgi-bin/carddisp.pl?gene=FAM241A</a> |
| LINC02694 | Long Intergenic Non-Protein Coding RNA 2694               | RNA Gene       | 22 | GC15P042443 | 1.004889 | <a href="https://www.genecards.org/cgi-">https://www.genecards.org/cgi-</a>                                                         |



|           |                                                               |             |    |             |          |                                                                                                                                         |
|-----------|---------------------------------------------------------------|-------------|----|-------------|----------|-----------------------------------------------------------------------------------------------------------------------------------------|
| HOXA10-AS | HOXA10 Antisense RNA                                          | RNA Gene    | 18 | GC07P027735 | 1.004889 | <a href="https://www.genecards.org/cgi-bin/carddisp.pl?gene=HOXA10-AS">https://www.genecards.org/cgi-bin/carddisp.pl?gene=HOXA10-AS</a> |
| LEF1-AS1  | LEF1 Antisense RNA 1                                          | RNA Gene    | 18 | GC04P108167 | 1.004889 | <a href="https://www.genecards.org/cgi-bin/carddisp.pl?gene=LEF1-AS1">https://www.genecards.org/cgi-bin/carddisp.pl?gene=LEF1-AS1</a>   |
| LINC00323 | Long Intergenic Non-Protein Coding RNA 323                    | RNA Gene    | 18 | GC21M041141 | 1.004889 | <a href="https://www.genecards.org/cgi-bin/carddisp.pl?gene=LINC00323">https://www.genecards.org/cgi-bin/carddisp.pl?gene=LINC00323</a> |
| PMS2P5    | PMS1 Homolog 2, Mismatch Repair System Component Pseudogene 5 | Pseudo gene | 18 | GC07P074890 | 1.004889 | <a href="https://www.genecards.org/cgi-bin/carddisp.pl?gene=PMS2P5">https://www.genecards.org/cgi-bin/carddisp.pl?gene=PMS2P5</a>       |
| DGUOK-AS1 | DGUOK Antisense RNA 1                                         | RNA Gene    | 17 | GC02M073947 | 1.004889 | <a href="https://www.genecards.org/cgi-bin/carddisp.pl?gene=DGUOK-AS1">https://www.genecards.org/cgi-bin/carddisp.pl?gene=DGUOK-AS1</a> |
| LINC00158 | Long Intergenic Non-Protein Coding RNA 158                    | RNA Gene    | 17 | GC21M025385 | 1.004889 | <a href="https://www.genecards.org/cgi-bin/carddisp.pl?gene=LINC00158">https://www.genecards.org/cgi-bin/carddisp.pl?gene=LINC00158</a> |
| LINC01088 | Long Intergenic Non-Protein Coding RNA 1088                   | RNA Gene    | 17 | GC04P078971 | 1.004889 | <a href="https://www.genecards.org/cgi-bin/carddisp.pl?gene=LINC01088">https://www.genecards.org/cgi-bin/carddisp.pl?gene=LINC01088</a> |
| SBF2-AS1  | SBF2 Antisense RNA 1                                          | RNA Gene    | 17 | GC11P009758 | 1.004889 | <a href="https://www.genecards.org/cgi-bin/carddisp.pl?gene=SBF2-AS1">https://www.genecards.org/cgi-bin/carddisp.pl?gene=SBF2-AS1</a>   |
| ADAM1A    | ADAM Metallopeptidase Domain 1A (Pseudogene)                  | Pseudo gene | 16 | GC12P111899 | 1.004889 | <a href="https://www.genecards.org/cgi-bin/carddisp.pl?gene=ADAM1A">https://www.genecards.org/cgi-bin/carddisp.pl?gene=ADAM1A</a>       |
| GATA3-AS1 | GATA3 Antisense RNA 1                                         | RNA Gene    | 16 | GC10M008016 | 1.004889 | <a href="https://www.genecards.org/cgi-bin/carddisp.pl?gene=GATA3-AS1">https://www.genecards.org/cgi-bin/carddisp.pl?gene=GATA3-AS1</a> |
| HIF1A-AS1 | HIF1A Antisense RNA 1                                         | RNA Gene    | 16 | GC14M061681 | 1.004889 | <a href="https://www.genecards.org/cgi-bin/carddisp.pl?gene=HIF1A-AS1">https://www.genecards.org/cgi-bin/carddisp.pl?gene=HIF1A-AS1</a> |
| JAZF1-AS1 | JAZF1 Antisense RNA 1                                         | RNA Gene    | 16 | GC07P028180 | 1.004889 | <a href="https://www.genecards.org/cgi-bin/carddisp.pl?gene=JAZF1-AS1">https://www.genecards.org/cgi-bin/carddisp.pl?gene=JAZF1-AS1</a> |
| LINC00593 | Long Intergenic Non-Protein Coding RNA 593                    | RNA Gene    | 16 | GC15P117549 | 1.004889 | <a href="https://www.genecards.org/cgi-bin/carddisp.pl?gene=LINC00593">https://www.genecards.org/cgi-bin/carddisp.pl?gene=LINC00593</a> |
| LINC00977 | Long Intergenic Non-Protein Coding RNA 977                    | RNA Gene    | 16 | GC08M131797 | 1.004889 | <a href="https://www.genecards.org/cgi-">https://www.genecards.org/cgi-</a>                                                             |

|            |                                                                                         |                |    |             |          |                                                                                                                                           |
|------------|-----------------------------------------------------------------------------------------|----------------|----|-------------|----------|-------------------------------------------------------------------------------------------------------------------------------------------|
|            |                                                                                         |                |    |             |          | <a href="https://www.genecards.org/cgi-bin/carddisp.pl?gene=LINC00977">bin/carddisp.pl?gene=LINC00977</a>                                 |
| LINC01082  | Long Intergenic Non-Protein Coding RNA 1082                                             | RNA Gene       | 16 | GC16P086065 | 1.004889 | <a href="https://www.genecards.org/cgi-bin/carddisp.pl?gene=LINC01082">https://www.genecards.org/cgi-bin/carddisp.pl?gene=LINC01082</a>   |
| MIR181A1HG | MIR181A1 Host Gene                                                                      | RNA Gene       | 16 | GC01M198780 | 1.004889 | <a href="https://www.genecards.org/cgi-bin/carddisp.pl?gene=MIR181A1HG">https://www.genecards.org/cgi-bin/carddisp.pl?gene=MIR181A1HG</a> |
| PCAT29     | Prostate Cancer Associated Transcript 29                                                | RNA Gene       | 16 | GC15P118926 | 1.004889 | <a href="https://www.genecards.org/cgi-bin/carddisp.pl?gene=PCAT29">https://www.genecards.org/cgi-bin/carddisp.pl?gene=PCAT29</a>         |
| SNORA72    | Small Nucleolar RNA, H/ACA Box 72                                                       | RNA Gene       | 16 | GC08M098042 | 1.004889 | <a href="https://www.genecards.org/cgi-bin/carddisp.pl?gene=SNORA72">https://www.genecards.org/cgi-bin/carddisp.pl?gene=SNORA72</a>       |
| TMEM9B-AS1 | TMEM9B Antisense RNA 1                                                                  | RNA Gene       | 16 | GC11P008964 | 1.004889 | <a href="https://www.genecards.org/cgi-bin/carddisp.pl?gene=TMEM9B-AS1">https://www.genecards.org/cgi-bin/carddisp.pl?gene=TMEM9B-AS1</a> |
| CELF2-AS2  | CELF2 Antisense RNA 2                                                                   | RNA Gene       | 15 | GC10M011071 | 1.004889 | <a href="https://www.genecards.org/cgi-bin/carddisp.pl?gene=CELF2-AS2">https://www.genecards.org/cgi-bin/carddisp.pl?gene=CELF2-AS2</a>   |
| HTD2       | Hydroxyacyl-Thioester Dehydratase Type 2                                                | Protein Coding | 15 | GC03P058306 | 1.004889 | <a href="https://www.genecards.org/cgi-bin/carddisp.pl?gene=HTD2">https://www.genecards.org/cgi-bin/carddisp.pl?gene=HTD2</a>             |
| SENCR      | Smooth Muscle And Endothelial Cell Enriched Migration/Differentiation-Associated LncRNA | RNA Gene       | 15 | GC11M128691 | 1.004889 | <a href="https://www.genecards.org/cgi-bin/carddisp.pl?gene=SENCR">https://www.genecards.org/cgi-bin/carddisp.pl?gene=SENCR</a>           |
| C20orf181  | Chromosome 20 Open Reading Frame 181                                                    | Uncategorized  | 14 | GC20M063844 | 1.004889 | <a href="https://www.genecards.org/cgi-bin/carddisp.pl?gene=C20orf181">https://www.genecards.org/cgi-bin/carddisp.pl?gene=C20orf181</a>   |
| FLNB-AS1   | FLNB Antisense RNA 1                                                                    | RNA Gene       | 14 | GC03M058150 | 1.004889 | <a href="https://www.genecards.org/cgi-bin/carddisp.pl?gene=FLNB-AS1">https://www.genecards.org/cgi-bin/carddisp.pl?gene=FLNB-AS1</a>     |
| LINC03033  | Long Intergenic Non-Protein Coding RNA 3033                                             | RNA Gene       | 14 | GC14P061572 | 1.004889 | <a href="https://www.genecards.org/cgi-bin/carddisp.pl?gene=LINC03033">https://www.genecards.org/cgi-bin/carddisp.pl?gene=LINC03033</a>   |
| MBL1P      | Mannose Binding Lectin 1, Pseudogene                                                    | Pseudogene     | 14 | GC10P092759 | 1.004889 | <a href="https://www.genecards.org/cgi-bin/carddisp.pl?gene=MBL1P">https://www.genecards.org/cgi-bin/carddisp.pl?gene=MBL1P</a>           |
| MIR1208    | MicroRNA 1208                                                                           | RNA Gene       | 14 | GC08P128150 | 1.004889 | <a href="https://www.genecards.org/cgi-bin/carddisp.pl?gene=MIR1208">https://www.genecards.org/cgi-bin/carddisp.pl?gene=MIR1208</a>       |



|            |                                                           |                |    |             |          |                                                                                                                                           |
|------------|-----------------------------------------------------------|----------------|----|-------------|----------|-------------------------------------------------------------------------------------------------------------------------------------------|
| MIR3142 HG | MIR3142 Host Gene                                         | RNA Gene       | 14 | GC05P160438 | 1.004889 | <a href="https://www.genecards.org/cgi-bin/carddisp.pl?gene=MIR3142HG">https://www.genecards.org/cgi-bin/carddisp.pl?gene=MIR3142HG</a>   |
| MIR4437    | MicroRNA 4437                                             | RNA Gene       | 14 | GC02M181305 | 1.004889 | <a href="https://www.genecards.org/cgi-bin/carddisp.pl?gene=MIR4437">https://www.genecards.org/cgi-bin/carddisp.pl?gene=MIR4437</a>       |
| MIR718     | MicroRNA 718                                              | RNA Gene       | 14 | GC0XM154019 | 1.004889 | <a href="https://www.genecards.org/cgi-bin/carddisp.pl?gene=MIR718">https://www.genecards.org/cgi-bin/carddisp.pl?gene=MIR718</a>         |
| NPIPB2     | Nuclear Pore Complex Interacting Protein Family Member B2 | Protein Coding | 14 | GC16M012293 | 1.004889 | <a href="https://www.genecards.org/cgi-bin/carddisp.pl?gene=NPIPB2">https://www.genecards.org/cgi-bin/carddisp.pl?gene=NPIPB2</a>         |
| PRKCQ-AS1  | PRKCQ Antisense RNA 1                                     | RNA Gene       | 14 | GC10P006580 | 1.004889 | <a href="https://www.genecards.org/cgi-bin/carddisp.pl?gene=PRKCQ-AS1">https://www.genecards.org/cgi-bin/carddisp.pl?gene=PRKCQ-AS1</a>   |
| SEMA3B-AS1 | SEMA3B Antisense RNA 1 (Head To Head)                     | RNA Gene       | 14 | GC03M051236 | 1.004889 | <a href="https://www.genecards.org/cgi-bin/carddisp.pl?gene=SEMA3B-AS1">https://www.genecards.org/cgi-bin/carddisp.pl?gene=SEMA3B-AS1</a> |
| TPI1P2     | Triosephosphate Isomerase 1 Pseudogene 2                  | Pseudo gene    | 14 | GC07P129055 | 1.004889 | <a href="https://www.genecards.org/cgi-bin/carddisp.pl?gene=TPI1P2">https://www.genecards.org/cgi-bin/carddisp.pl?gene=TPI1P2</a>         |
| BOLA3-DT   | BOLA3 Divergent Transcript                                | RNA Gene       | 13 | GC02P074146 | 1.004889 | <a href="https://www.genecards.org/cgi-bin/carddisp.pl?gene=BOLA3-DT">https://www.genecards.org/cgi-bin/carddisp.pl?gene=BOLA3-DT</a>     |
| FAM205BP   | Family With Sequence Similarity 205 Member B, Pseudogene  | Pseudo gene    | 13 | GC09M034837 | 1.004889 | <a href="https://www.genecards.org/cgi-bin/carddisp.pl?gene=FAM205BP">https://www.genecards.org/cgi-bin/carddisp.pl?gene=FAM205BP</a>     |
| LINC00824  | Long Intergenic Non-Protein Coding RNA 824                | RNA Gene       | 13 | GC08M128405 | 1.004889 | <a href="https://www.genecards.org/cgi-bin/carddisp.pl?gene=LINC00824">https://www.genecards.org/cgi-bin/carddisp.pl?gene=LINC00824</a>   |
| MIR3202-2  | MicroRNA 3202-2                                           | RNA Gene       | 13 | GC0XM153981 | 1.004889 | <a href="https://www.genecards.org/cgi-bin/carddisp.pl?gene=MIR3202-2">https://www.genecards.org/cgi-bin/carddisp.pl?gene=MIR3202-2</a>   |
| MROH3P     | Maestro Heat Like Repeat Family Member 3, Pseudogene      | Pseudo gene    | 13 | GC01P200920 | 1.004889 | <a href="https://www.genecards.org/cgi-bin/carddisp.pl?gene=MROH3P">https://www.genecards.org/cgi-bin/carddisp.pl?gene=MROH3P</a>         |
| NEURL1-AS1 | NEURL1 Antisense RNA 1                                    | RNA Gene       | 13 | GC10M103479 | 1.004889 | <a href="https://www.genecards.org/cgi-bin/carddisp.pl?gene=NEURL1-AS1">https://www.genecards.org/cgi-bin/carddisp.pl?gene=NEURL1-AS1</a> |
| P4HA2-AS1  | P4HA2 Antisense RNA 1                                     | RNA Gene       | 13 | GC05P132186 | 1.004889 | <a href="https://www.genecards.org/cgi-bin/carddisp.pl?gene=P4HA2-AS1">https://www.genecards.org/cgi-bin/carddisp.pl?gene=P4HA2-AS1</a>   |

|                 |                                                      |                |    |             |          |                                                                                                                                                     |
|-----------------|------------------------------------------------------|----------------|----|-------------|----------|-----------------------------------------------------------------------------------------------------------------------------------------------------|
|                 |                                                      |                |    |             |          | <a href="https://www.genecards.org/cgi-bin/carddisp.pl?gene=P4HA2-AS1">bin/carddisp.pl?gene=P4HA2-AS1</a>                                           |
| TGFA-IT1        | TGFA Intronic Transcript 1                           | RNA Gene       | 13 | GC02M070468 | 1.004889 | <a href="https://www.genecards.org/cgi-bin/carddisp.pl?gene=TGFA-IT1">https://www.genecards.org/cgi-bin/carddisp.pl?gene=TGFA-IT1</a>               |
| TNFRSF14-AS1    | TNFRSF14 Antisense RNA 1                             | RNA Gene       | 13 | GC01M006028 | 1.004889 | <a href="https://www.genecards.org/cgi-bin/carddisp.pl?gene=TNFRSF14-AS1">https://www.genecards.org/cgi-bin/carddisp.pl?gene=TNFRSF14-AS1</a>       |
| WAKMAR2         | Wound And Keratinocyte Migration Associated LncRNA 2 | RNA Gene       | 13 | GC06M137820 | 1.004889 | <a href="https://www.genecards.org/cgi-bin/carddisp.pl?gene=WAKMAR2">https://www.genecards.org/cgi-bin/carddisp.pl?gene=WAKMAR2</a>                 |
| B3GALT9         | Beta-1,3-Galactosyltransferase 9                     | Protein Coding | 12 | GC09P120792 | 1.004889 | <a href="https://www.genecards.org/cgi-bin/carddisp.pl?gene=B3GALT9">https://www.genecards.org/cgi-bin/carddisp.pl?gene=B3GALT9</a>                 |
| CFAP20DC-AS1    | CFAP20DC Antisense RNA 1                             | RNA Gene       | 12 | GC03P058825 | 1.004889 | <a href="https://www.genecards.org/cgi-bin/carddisp.pl?gene=CFAP20DC-AS1">https://www.genecards.org/cgi-bin/carddisp.pl?gene=CFAP20DC-AS1</a>       |
| ENSG00000248751 | Novel Protein                                        | Protein Coding | 12 | GC22M030285 | 1.004889 | <a href="https://www.genecards.org/cgi-bin/carddisp.pl?gene=ENSG00000248751">https://www.genecards.org/cgi-bin/carddisp.pl?gene=ENSG00000248751</a> |
| ETS1-AS1        | ETS1 Antisense RNA 1                                 | RNA Gene       | 12 | GC11P128527 | 1.004889 | <a href="https://www.genecards.org/cgi-bin/carddisp.pl?gene=ETS1-AS1">https://www.genecards.org/cgi-bin/carddisp.pl?gene=ETS1-AS1</a>               |
| FLNC-AS1        | FLNC Antisense RNA 1                                 | RNA Gene       | 12 | GC07M128851 | 1.004889 | <a href="https://www.genecards.org/cgi-bin/carddisp.pl?gene=FLNC-AS1">https://www.genecards.org/cgi-bin/carddisp.pl?gene=FLNC-AS1</a>               |
| LINC00709       | Long Intergenic Non-Protein Coding RNA 709           | RNA Gene       | 12 | GC10P009275 | 1.004889 | <a href="https://www.genecards.org/cgi-bin/carddisp.pl?gene=LINC00709">https://www.genecards.org/cgi-bin/carddisp.pl?gene=LINC00709</a>             |
| LINC01934       | Long Intergenic Non-Protein Coding RNA 1934          | RNA Gene       | 12 | GC02P181086 | 1.004889 | <a href="https://www.genecards.org/cgi-bin/carddisp.pl?gene=LINC01934">https://www.genecards.org/cgi-bin/carddisp.pl?gene=LINC01934</a>             |
| LINC02098       | Long Intergenic Non-Protein Coding RNA 2098          | RNA Gene       | 12 | GC11P128210 | 1.004889 | <a href="https://www.genecards.org/cgi-bin/carddisp.pl?gene=LINC02098">https://www.genecards.org/cgi-bin/carddisp.pl?gene=LINC02098</a>             |
| LNCRNA-IUR      | LncRNA Imatinib Upregulated                          | RNA Gene       | 12 | GC11P095154 | 1.004889 | <a href="https://www.genecards.org/cgi-bin/carddisp.pl?gene=LNCRNA-IUR">https://www.genecards.org/cgi-bin/carddisp.pl?gene=LNCRNA-IUR</a>           |
| MIR3202-1       | MicroRNA 3202-1                                      | RNA Gene       | 12 | GC0XP153981 | 1.004889 | <a href="https://www.genecards.org/cgi-bin/carddisp.pl?gene=MIR3202-1">https://www.genecards.org/cgi-bin/carddisp.pl?gene=MIR3202-1</a>             |

|             |                                             |             |    |             |          |                                                                                                                                             |
|-------------|---------------------------------------------|-------------|----|-------------|----------|---------------------------------------------------------------------------------------------------------------------------------------------|
| SEPT5-GP1BB | SEPT5-GP1BB Readthrough                     | RNA Gene    | 12 | GC22P019717 | 1.004889 | <a href="https://www.genecards.org/cgi-bin/carddisp.pl?gene=SEPT5-GP1BB">https://www.genecards.org/cgi-bin/carddisp.pl?gene=SEPT5-GP1BB</a> |
| SMG1P5      | SMG1 Pseudogene 5                           | Pseudo gene | 12 | GC16M030267 | 1.004889 | <a href="https://www.genecards.org/cgi-bin/carddisp.pl?gene=SMG1P5">https://www.genecards.org/cgi-bin/carddisp.pl?gene=SMG1P5</a>           |
| TLE1-DT     | TLE1 Divergent Transcript                   | RNA Gene    | 12 | GC09P081690 | 1.004889 | <a href="https://www.genecards.org/cgi-bin/carddisp.pl?gene=TLE1-DT">https://www.genecards.org/cgi-bin/carddisp.pl?gene=TLE1-DT</a>         |
| C6orf47-AS1 | C6orf47 Antisense RNA 1                     | RNA Gene    | 11 | GC06P083704 | 1.004889 | <a href="https://www.genecards.org/cgi-bin/carddisp.pl?gene=C6orf47-AS1">https://www.genecards.org/cgi-bin/carddisp.pl?gene=C6orf47-AS1</a> |
| CD101-AS1   | CD101 Antisense RNA 1                       | RNA Gene    | 11 | GC01M117023 | 1.004889 | <a href="https://www.genecards.org/cgi-bin/carddisp.pl?gene=CD101-AS1">https://www.genecards.org/cgi-bin/carddisp.pl?gene=CD101-AS1</a>     |
| CENATA C-DT | CENATAC Divergent Transcript                | RNA Gene    | 11 | GC11M118984 | 1.004889 | <a href="https://www.genecards.org/cgi-bin/carddisp.pl?gene=CENATAC-DT">https://www.genecards.org/cgi-bin/carddisp.pl?gene=CENATAC-DT</a>   |
| LINC01303   | Long Intergenic Non-Protein Coding RNA 1303 | RNA Gene    | 11 | GC14M061557 | 1.004889 | <a href="https://www.genecards.org/cgi-bin/carddisp.pl?gene=LINC01303">https://www.genecards.org/cgi-bin/carddisp.pl?gene=LINC01303</a>     |
| LINC02153   | Long Intergenic Non-Protein Coding RNA 2153 | RNA Gene    | 11 | GC08P020974 | 1.004889 | <a href="https://www.genecards.org/cgi-bin/carddisp.pl?gene=LINC02153">https://www.genecards.org/cgi-bin/carddisp.pl?gene=LINC02153</a>     |
| LINC02649   | Long Intergenic Non-Protein Coding RNA 2649 | RNA Gene    | 11 | GC10P006357 | 1.004889 | <a href="https://www.genecards.org/cgi-bin/carddisp.pl?gene=LINC02649">https://www.genecards.org/cgi-bin/carddisp.pl?gene=LINC02649</a>     |
| LINC02709   | Long Intergenic Non-Protein Coding RNA 2709 | RNA Gene    | 11 | GC11M009754 | 1.004889 | <a href="https://www.genecards.org/cgi-bin/carddisp.pl?gene=LINC02709">https://www.genecards.org/cgi-bin/carddisp.pl?gene=LINC02709</a>     |
| LINC03004   | Long Intergenic Non-Protein Coding RNA 3004 | RNA Gene    | 11 | GC06P137658 | 1.004889 | <a href="https://www.genecards.org/cgi-bin/carddisp.pl?gene=LINC03004">https://www.genecards.org/cgi-bin/carddisp.pl?gene=LINC03004</a>     |
| MIR4328     | MicroRNA 4328                               | RNA Gene    | 11 | GC0XM078901 | 1.004889 | <a href="https://www.genecards.org/cgi-bin/carddisp.pl?gene=MIR4328">https://www.genecards.org/cgi-bin/carddisp.pl?gene=MIR4328</a>         |
| RPL13P2     | Ribosomal Protein L13 Pseudogene 2          | Pseudo gene | 11 | GC20P046099 | 1.004889 | <a href="https://www.genecards.org/cgi-bin/carddisp.pl?gene=RPL13P2">https://www.genecards.org/cgi-bin/carddisp.pl?gene=RPL13P2</a>         |
| TAGAP-AS1   | TAGAP Antisense RNA 1                       | RNA Gene    | 11 | GC06P160653 | 1.004889 | <a href="https://www.genecards.org/cgi-">https://www.genecards.org/cgi-</a>                                                                 |

|                 |                                                 |                |    |             |          |                                                                                                                                                     |
|-----------------|-------------------------------------------------|----------------|----|-------------|----------|-----------------------------------------------------------------------------------------------------------------------------------------------------|
|                 |                                                 |                |    |             |          | <a href="#">bin/carddisp.pl?gene=TAGAP-AS1</a>                                                                                                      |
| ADM-DT          | ADM Divergent Transcript                        | RNA Gene       | 10 | GC11M010302 | 1.004889 | <a href="https://www.genecards.org/cgi-bin/carddisp.pl?gene=ADM-DT">https://www.genecards.org/cgi-bin/carddisp.pl?gene=ADM-DT</a>                   |
| CCDC201         | Coiled-Coil Domain Containing 201               | Protein Coding | 10 | GC07M045859 | 1.004889 | <a href="https://www.genecards.org/cgi-bin/carddisp.pl?gene=CCDC201">https://www.genecards.org/cgi-bin/carddisp.pl?gene=CCDC201</a>                 |
| CUTALP          | CutA Divalent Cation Tolerance Like, Pseudogene | Pseudo gene    | 10 | GC09P120826 | 1.004889 | <a href="https://www.genecards.org/cgi-bin/carddisp.pl?gene=CUTALP">https://www.genecards.org/cgi-bin/carddisp.pl?gene=CUTALP</a>                   |
| EMSLR           | E2F1 mRNA Stabilizing LncRNA                    | RNA Gene       | 10 | GC07P101335 | 1.004889 | <a href="https://www.genecards.org/cgi-bin/carddisp.pl?gene=EMSLR">https://www.genecards.org/cgi-bin/carddisp.pl?gene=EMSLR</a>                     |
| ENSG00000167807 | Novel Transcript                                | Protein Coding | 10 | GC19M010400 | 1.004889 | <a href="https://www.genecards.org/cgi-bin/carddisp.pl?gene=ENSG00000167807">https://www.genecards.org/cgi-bin/carddisp.pl?gene=ENSG00000167807</a> |
| ENSG00000228778 | Novel Transcript                                | RNA Gene       | 10 | GC10P099527 | 1.004889 | <a href="https://www.genecards.org/cgi-bin/carddisp.pl?gene=ENSG00000228778">https://www.genecards.org/cgi-bin/carddisp.pl?gene=ENSG00000228778</a> |
| ENSG00000249624 | Novel Protein                                   | Protein Coding | 10 | GC21P033246 | 1.004889 | <a href="https://www.genecards.org/cgi-bin/carddisp.pl?gene=ENSG00000249624">https://www.genecards.org/cgi-bin/carddisp.pl?gene=ENSG00000249624</a> |
| LINC01343       | Long Intergenic Non-Protein Coding RNA 1343     | RNA Gene       | 10 | GC01M038209 | 1.004889 | <a href="https://www.genecards.org/cgi-bin/carddisp.pl?gene=LINC01343">https://www.genecards.org/cgi-bin/carddisp.pl?gene=LINC01343</a>             |
| LINC01898       | Long Intergenic Non-Protein Coding RNA 1898     | RNA Gene       | 10 | GC18M075697 | 1.004889 | <a href="https://www.genecards.org/cgi-bin/carddisp.pl?gene=LINC01898">https://www.genecards.org/cgi-bin/carddisp.pl?gene=LINC01898</a>             |
| LINC01980       | Long Intergenic Non-Protein Coding RNA 1980     | RNA Gene       | 10 | GC03P027798 | 1.004889 | <a href="https://www.genecards.org/cgi-bin/carddisp.pl?gene=LINC01980">https://www.genecards.org/cgi-bin/carddisp.pl?gene=LINC01980</a>             |
| LINC02528       | Long Intergenic Non-Protein Coding RNA 2528     | RNA Gene       | 10 | GC06M137945 | 1.004889 | <a href="https://www.genecards.org/cgi-bin/carddisp.pl?gene=LINC02528">https://www.genecards.org/cgi-bin/carddisp.pl?gene=LINC02528</a>             |
| LINC02539       | Long Intergenic Non-Protein Coding RNA 2539     | RNA Gene       | 10 | GC06M137731 | 1.004889 | <a href="https://www.genecards.org/cgi-bin/carddisp.pl?gene=LINC02539">https://www.genecards.org/cgi-bin/carddisp.pl?gene=LINC02539</a>             |
| LINC02664       | Long Intergenic Non-Protein Coding RNA 2664     | RNA Gene       | 10 | GC10P031190 | 1.004889 | <a href="https://www.genecards.org/cgi-bin/carddisp.pl?gene=LINC02664">https://www.genecards.org/cgi-bin/carddisp.pl?gene=LINC02664</a>             |

|              |                                              |             |    |             |          |                                                                                                                                               |
|--------------|----------------------------------------------|-------------|----|-------------|----------|-----------------------------------------------------------------------------------------------------------------------------------------------|
| LINC02757    | Long Intergenic Non-Protein Coding RNA 2757  | RNA Gene    | 10 | GC11M090455 | 1.004889 | <a href="https://www.genecards.org/cgi-bin/carddisp.pl?gene=LINC02757">https://www.genecards.org/cgi-bin/carddisp.pl?gene=LINC02757</a>       |
| LINC02789    | Long Intergenic Non-Protein Coding RNA 2789  | RNA Gene    | 10 | GC01P199149 | 1.004889 | <a href="https://www.genecards.org/cgi-bin/carddisp.pl?gene=LINC02789">https://www.genecards.org/cgi-bin/carddisp.pl?gene=LINC02789</a>       |
| LNCPRESS1    | LncRNA P53 Regulated And ESC Associated 1    | RNA Gene    | 10 | GC07P101304 | 1.004889 | <a href="https://www.genecards.org/cgi-bin/carddisp.pl?gene=LNCPRESS1">https://www.genecards.org/cgi-bin/carddisp.pl?gene=LNCPRESS1</a>       |
| LOC100996583 | Uncharacterized LOC100996583                 | RNA Gene    | 10 | GC01P003937 | 1.004889 | <a href="https://www.genecards.org/cgi-bin/carddisp.pl?gene=LOC100996583">https://www.genecards.org/cgi-bin/carddisp.pl?gene=LOC100996583</a> |
| LOC101929290 | Uncharacterized LOC101929290                 | RNA Gene    | 10 | GC08M011315 | 1.004889 | <a href="https://www.genecards.org/cgi-bin/carddisp.pl?gene=LOC101929290">https://www.genecards.org/cgi-bin/carddisp.pl?gene=LOC101929290</a> |
| MIR4308      | MicroRNA 4308                                | RNA Gene    | 10 | GC14M054878 | 1.004889 | <a href="https://www.genecards.org/cgi-bin/carddisp.pl?gene=MIR4308">https://www.genecards.org/cgi-bin/carddisp.pl?gene=MIR4308</a>           |
| PCNPP1       | PEST Containing Nuclear Protein Pseudogene 1 | Pseudo gene | 10 | GC12M111666 | 1.004889 | <a href="https://www.genecards.org/cgi-bin/carddisp.pl?gene=PCNPP1">https://www.genecards.org/cgi-bin/carddisp.pl?gene=PCNPP1</a>             |
| PLCL2-AS1    | PLCL2 Antisense RNA 1                        | RNA Gene    | 10 | GC03M017042 | 1.004889 | <a href="https://www.genecards.org/cgi-bin/carddisp.pl?gene=PLCL2-AS1">https://www.genecards.org/cgi-bin/carddisp.pl?gene=PLCL2-AS1</a>       |
| PRDX6-AS1    | PRDX6 Antisense RNA 1                        | RNA Gene    | 10 | GC01M173418 | 1.004889 | <a href="https://www.genecards.org/cgi-bin/carddisp.pl?gene=PRDX6-AS1">https://www.genecards.org/cgi-bin/carddisp.pl?gene=PRDX6-AS1</a>       |
| RPL7AP14     | Ribosomal Protein L7a Pseudogene 14          | Pseudo gene | 10 | GC20M037444 | 1.004889 | <a href="https://www.genecards.org/cgi-bin/carddisp.pl?gene=RPL7AP14">https://www.genecards.org/cgi-bin/carddisp.pl?gene=RPL7AP14</a>         |
| SPATA31D5P   | SPATA31 Subfamily D Member 5, Pseudogene     | Pseudo gene | 10 | GC09P081913 | 1.004889 | <a href="https://www.genecards.org/cgi-bin/carddisp.pl?gene=SPATA31D5P">https://www.genecards.org/cgi-bin/carddisp.pl?gene=SPATA31D5P</a>     |
| TDH-AS1      | TDH Antisense RNA 1                          | RNA Gene    | 10 | GC08M011181 | 1.004889 | <a href="https://www.genecards.org/cgi-bin/carddisp.pl?gene=TDH-AS1">https://www.genecards.org/cgi-bin/carddisp.pl?gene=TDH-AS1</a>           |
| TSPAN14-AS1  | TSPAN14 Antisense RNA 1                      | RNA Gene    | 10 | GC10M082037 | 1.004889 | <a href="https://www.genecards.org/cgi-bin/carddisp.pl?gene=TSPAN14-AS1">https://www.genecards.org/cgi-bin/carddisp.pl?gene=TSPAN14-AS1</a>   |
| ZNF232-AS1   | ZNF232 Antisense RNA 1                       | RNA Gene    | 10 | GC17P005518 | 1.004889 | <a href="https://www.genecards.org/cgi-bin/carddisp.pl?gene=ZNF232-AS1">https://www.genecards.org/cgi-bin/carddisp.pl?gene=ZNF232-AS1</a>     |

|                 |                                       |               |    |             |          |                                                                                                                                                     |
|-----------------|---------------------------------------|---------------|----|-------------|----------|-----------------------------------------------------------------------------------------------------------------------------------------------------|
|                 |                                       |               |    |             |          | <a href="#">bin/carddisp.pl?gene=ZNF232-AS1</a>                                                                                                     |
| ZNF747-DT       | ZNF747 Divergent Transcript           | RNA Gene      | 10 | GC16P041647 | 1.004889 | <a href="https://www.genecards.org/cgi-bin/carddisp.pl?gene=ZNF747-DT">https://www.genecards.org/cgi-bin/carddisp.pl?gene=ZNF747-DT</a>             |
| CALM2P2         | Calmodulin 2 Pseudogene 2             | Pseudo gene   | 9  | GC10P070163 | 1.004889 | <a href="https://www.genecards.org/cgi-bin/carddisp.pl?gene=CALM2P2">https://www.genecards.org/cgi-bin/carddisp.pl?gene=CALM2P2</a>                 |
| EBAG9P1         | EBAG9 Pseudogene 1                    | Pseudo gene   | 9  | GC10M099697 | 1.004889 | <a href="https://www.genecards.org/cgi-bin/carddisp.pl?gene=EBAG9P1">https://www.genecards.org/cgi-bin/carddisp.pl?gene=EBAG9P1</a>                 |
| ENSG00000204929 | Novel Transcript                      | Uncategorized | 9  | GC02P065451 | 1.004889 | <a href="https://www.genecards.org/cgi-bin/carddisp.pl?gene=ENSG00000204929">https://www.genecards.org/cgi-bin/carddisp.pl?gene=ENSG00000204929</a> |
| ENSG00000217702 | Novel Transcript, Antisense To BOLA3  | RNA Gene      | 9  | GC02P074130 | 1.004889 | <a href="https://www.genecards.org/cgi-bin/carddisp.pl?gene=ENSG00000217702">https://www.genecards.org/cgi-bin/carddisp.pl?gene=ENSG00000217702</a> |
| ENSG00000224015 | Novel Transcript                      | RNA Gene      | 9  | GC05M132062 | 1.004889 | <a href="https://www.genecards.org/cgi-bin/carddisp.pl?gene=ENSG00000224015">https://www.genecards.org/cgi-bin/carddisp.pl?gene=ENSG00000224015</a> |
| ENSG00000228005 | Novel Transcript                      | RNA Gene      | 9  | GC07M050181 | 1.004889 | <a href="https://www.genecards.org/cgi-bin/carddisp.pl?gene=ENSG00000228005">https://www.genecards.org/cgi-bin/carddisp.pl?gene=ENSG00000228005</a> |
| ENSG00000228509 | Novel Transcript, Antisense To NAB1   | RNA Gene      | 9  | GC02M190672 | 1.004889 | <a href="https://www.genecards.org/cgi-bin/carddisp.pl?gene=ENSG00000228509">https://www.genecards.org/cgi-bin/carddisp.pl?gene=ENSG00000228509</a> |
| ENSG00000228863 | Novel Transcript, Antisense To CD48   | RNA Gene      | 9  | GC01P160671 | 1.004889 | <a href="https://www.genecards.org/cgi-bin/carddisp.pl?gene=ENSG00000228863">https://www.genecards.org/cgi-bin/carddisp.pl?gene=ENSG00000228863</a> |
| ENSG00000231128 | Novel Transcript, Antisense To PTPN22 | RNA Gene      | 9  | GC01P113812 | 1.004889 | <a href="https://www.genecards.org/cgi-bin/carddisp.pl?gene=ENSG00000231128">https://www.genecards.org/cgi-bin/carddisp.pl?gene=ENSG00000231128</a> |
| ENSG00000231355 | Novel Transcript                      | RNA Gene      | 9  | GC21M033482 | 1.004889 | <a href="https://www.genecards.org/cgi-bin/carddisp.pl?gene=ENSG00000231355">https://www.genecards.org/cgi-bin/carddisp.pl?gene=ENSG00000231355</a> |
| ENSG00000231467 | Novel Transcript                      | RNA Gene      | 9  | GC22P037080 | 1.004889 | <a href="https://www.genecards.org/cgi-bin/carddisp.pl?gene=ENSG00000231467">https://www.genecards.org/cgi-bin/carddisp.pl?gene=ENSG00000231467</a> |
| ENSG00000232638 | Novel Transcript                      | RNA Gene      | 9  | GC10P008051 | 1.004889 | <a href="https://www.genecards.org/cgi-bin/carddisp.pl?gene=ENSG00000232638">https://www.genecards.org/cgi-bin/carddisp.pl?gene=ENSG00000232638</a> |

|                 |                                             |                |   |             |          |                                                                                                                                                     |
|-----------------|---------------------------------------------|----------------|---|-------------|----------|-----------------------------------------------------------------------------------------------------------------------------------------------------|
| ENSG00000234132 | Novel Transcript, Antisense CACNA1S         | RNA Gene       | 9 | GC01P201032 | 1.004889 | <a href="https://www.genecards.org/cgi-bin/carddisp.pl?gene=ENSG00000234132">https://www.genecards.org/cgi-bin/carddisp.pl?gene=ENSG00000234132</a> |
| ENSG00000234255 | Novel Transcript                            | RNA Gene       | 9 | GC02M065442 | 1.004889 | <a href="https://www.genecards.org/cgi-bin/carddisp.pl?gene=ENSG00000234255">https://www.genecards.org/cgi-bin/carddisp.pl?gene=ENSG00000234255</a> |
| ENSG00000236935 | Novel Transcript                            | RNA Gene       | 9 | GC11M089710 | 1.004889 | <a href="https://www.genecards.org/cgi-bin/carddisp.pl?gene=ENSG00000236935">https://www.genecards.org/cgi-bin/carddisp.pl?gene=ENSG00000236935</a> |
| ENSG00000249141 | Novel Protein                               | Protein Coding | 9 | GC06M166858 | 1.004889 | <a href="https://www.genecards.org/cgi-bin/carddisp.pl?gene=ENSG00000249141">https://www.genecards.org/cgi-bin/carddisp.pl?gene=ENSG00000249141</a> |
| ENSG00000253720 | Novel Transcript                            | RNA Gene       | 9 | GC08P129939 | 1.004889 | <a href="https://www.genecards.org/cgi-bin/carddisp.pl?gene=ENSG00000253720">https://www.genecards.org/cgi-bin/carddisp.pl?gene=ENSG00000253720</a> |
| ENSG00000255422 | Novel Transcript                            | RNA Gene       | 9 | GC11P118700 | 1.004889 | <a href="https://www.genecards.org/cgi-bin/carddisp.pl?gene=ENSG00000255422">https://www.genecards.org/cgi-bin/carddisp.pl?gene=ENSG00000255422</a> |
| ENSG00000258989 | Novel Protein                               | Protein Coding | 9 | GC14P061530 | 1.004889 | <a href="https://www.genecards.org/cgi-bin/carddisp.pl?gene=ENSG00000258989">https://www.genecards.org/cgi-bin/carddisp.pl?gene=ENSG00000258989</a> |
| ENSG00000260267 | Novel Transcript, Antisense To ARMC5        | RNA Gene       | 9 | GC16M031456 | 1.004889 | <a href="https://www.genecards.org/cgi-bin/carddisp.pl?gene=ENSG00000260267">https://www.genecards.org/cgi-bin/carddisp.pl?gene=ENSG00000260267</a> |
| ENSG00000269918 | Novel Transcript                            | RNA Gene       | 9 | GC08M011104 | 1.004889 | <a href="https://www.genecards.org/cgi-bin/carddisp.pl?gene=ENSG00000269918">https://www.genecards.org/cgi-bin/carddisp.pl?gene=ENSG00000269918</a> |
| ENSG00000269954 | Novel Transcript, Antisense To BLK          | RNA Gene       | 9 | GC08M011552 | 1.004889 | <a href="https://www.genecards.org/cgi-bin/carddisp.pl?gene=ENSG00000269954">https://www.genecards.org/cgi-bin/carddisp.pl?gene=ENSG00000269954</a> |
| LINC02084       | Long Intergenic Non-Protein Coding RNA 2084 | RNA Gene       | 9 | GC03P027714 | 1.004889 | <a href="https://www.genecards.org/cgi-bin/carddisp.pl?gene=LINC02084">https://www.genecards.org/cgi-bin/carddisp.pl?gene=LINC02084</a>             |
| LINC02132       | Long Intergenic Non-Protein Coding RNA 2132 | RNA Gene       | 9 | GC16M085935 | 1.004889 | <a href="https://www.genecards.org/cgi-bin/carddisp.pl?gene=LINC02132">https://www.genecards.org/cgi-bin/carddisp.pl?gene=LINC02132</a>             |
| LINC02356       | Long Intergenic Non-Protein Coding RNA 2356 | RNA Gene       | 9 | GC12P111371 | 1.004889 | <a href="https://www.genecards.org/cgi-bin/carddisp.pl?gene=LINC02356">https://www.genecards.org/cgi-bin/carddisp.pl?gene=LINC02356</a>             |
| LINC02357       | Long Intergenic Non-Protein Coding RNA 2357 | RNA Gene       | 9 | GC04P026071 | 1.004889 | <a href="https://www.genecards.org/cgi-bin/carddisp.pl?gene=LINC02357">https://www.genecards.org/cgi-bin/carddisp.pl?gene=LINC02357</a>             |

|              |                                             |                |   |             |          |                                                                                                                                                             |
|--------------|---------------------------------------------|----------------|---|-------------|----------|-------------------------------------------------------------------------------------------------------------------------------------------------------------|
|              |                                             |                |   |             |          | <a href="https://www.ncbi.nlm.nih.gov/ncbi/cdd/bin/cdddisp.pl?gene=LINC02357">bin/cdddisp.pl?gene=LINC02357</a>                                             |
| LINC02676    | Long Intergenic Non-Protein Coding RNA 2676 | RNA Gene       | 9 | GC10P008726 | 1.004889 | <a href="https://www.ncbi.nlm.nih.gov/ncbi/cdd/bin/cdddisp.pl?gene=LINC02676">https://www.ncbi.nlm.nih.gov/ncbi/cdd/bin/cdddisp.pl?gene=LINC02676</a>       |
| LINC02723    | Long Intergenic Non-Protein Coding RNA 2723 | RNA Gene       | 9 | GC11M089711 | 1.004889 | <a href="https://www.ncbi.nlm.nih.gov/ncbi/cdd/bin/cdddisp.pl?gene=LINC02723">https://www.ncbi.nlm.nih.gov/ncbi/cdd/bin/cdddisp.pl?gene=LINC02723</a>       |
| LOC105371083 | Uncharacterized LOC105371083                | RNA Gene       | 9 | GC16M012272 | 1.004889 | <a href="https://www.ncbi.nlm.nih.gov/ncbi/cdd/bin/cdddisp.pl?gene=LOC105371083">https://www.ncbi.nlm.nih.gov/ncbi/cdd/bin/cdddisp.pl?gene=LOC105371083</a> |
| LOC112267968 | Uncharacterized LOC112267968                | Protein Coding | 9 | GC06M159053 | 1.004889 | <a href="https://www.ncbi.nlm.nih.gov/ncbi/cdd/bin/cdddisp.pl?gene=LOC112267968">https://www.ncbi.nlm.nih.gov/ncbi/cdd/bin/cdddisp.pl?gene=LOC112267968</a> |
| LOC124903255 | Small Nucleolar RNA SNORD116                | RNA Gene       | 9 | GC13M039869 | 1.004889 | <a href="https://www.ncbi.nlm.nih.gov/ncbi/cdd/bin/cdddisp.pl?gene=LOC124903255">https://www.ncbi.nlm.nih.gov/ncbi/cdd/bin/cdddisp.pl?gene=LOC124903255</a> |
| NEFHP1       | Neurofilament Heavy Pseudogene 1            | Pseudo gene    | 9 | GC01M116739 | 1.004889 | <a href="https://www.ncbi.nlm.nih.gov/ncbi/cdd/bin/cdddisp.pl?gene=NEFHP1">https://www.ncbi.nlm.nih.gov/ncbi/cdd/bin/cdddisp.pl?gene=NEFHP1</a>             |
| PPIAP6       | Peptidylprolyl Isomerase A Pseudogene 6     | Pseudo gene    | 9 | GC14M068421 | 1.004889 | <a href="https://www.ncbi.nlm.nih.gov/ncbi/cdd/bin/cdddisp.pl?gene=PPIAP6">https://www.ncbi.nlm.nih.gov/ncbi/cdd/bin/cdddisp.pl?gene=PPIAP6</a>             |
| RNU6-474P    | RNA, U6 Small Nuclear 474, Pseudogene       | Pseudo gene    | 9 | GC02P203782 | 1.004889 | <a href="https://www.ncbi.nlm.nih.gov/ncbi/cdd/bin/cdddisp.pl?gene=RNU6-474P">https://www.ncbi.nlm.nih.gov/ncbi/cdd/bin/cdddisp.pl?gene=RNU6-474P</a>       |
| RNU6-933P    | RNA, U6 Small Nuclear 933, Pseudogene       | Pseudo gene    | 9 | GC11M060985 | 1.004889 | <a href="https://www.ncbi.nlm.nih.gov/ncbi/cdd/bin/cdddisp.pl?gene=RNU6-933P">https://www.ncbi.nlm.nih.gov/ncbi/cdd/bin/cdddisp.pl?gene=RNU6-933P</a>       |
| RNU6-959P    | RNA, U6 Small Nuclear 959, Pseudogene       | Pseudo gene    | 9 | GC02P191121 | 1.004889 | <a href="https://www.ncbi.nlm.nih.gov/ncbi/cdd/bin/cdddisp.pl?gene=RNU6-959P">https://www.ncbi.nlm.nih.gov/ncbi/cdd/bin/cdddisp.pl?gene=RNU6-959P</a>       |
| RPL21P97     | Ribosomal Protein L21 Pseudogene 97         | Pseudo gene    | 9 | GC11P009694 | 1.004889 | <a href="https://www.ncbi.nlm.nih.gov/ncbi/cdd/bin/cdddisp.pl?gene=RPL21P97">https://www.ncbi.nlm.nih.gov/ncbi/cdd/bin/cdddisp.pl?gene=RPL21P97</a>         |
| RPL32P23     | Ribosomal Protein L32 Pseudogene 23         | Pseudo gene    | 9 | GC10M006072 | 1.004889 | <a href="https://www.ncbi.nlm.nih.gov/ncbi/cdd/bin/cdddisp.pl?gene=RPL32P23">https://www.ncbi.nlm.nih.gov/ncbi/cdd/bin/cdddisp.pl?gene=RPL32P23</a>         |
| RPL7AP70     | Ribosomal Protein L7a Pseudogene 70         | Pseudo gene    | 9 | GC22P035817 | 1.004889 | <a href="https://www.ncbi.nlm.nih.gov/ncbi/cdd/bin/cdddisp.pl?gene=RPL7AP70">https://www.ncbi.nlm.nih.gov/ncbi/cdd/bin/cdddisp.pl?gene=RPL7AP70</a>         |



|                     |                                                                |                |   |                 |              |                                                                                                                                                     |
|---------------------|----------------------------------------------------------------|----------------|---|-----------------|--------------|-----------------------------------------------------------------------------------------------------------------------------------------------------|
| RPL8P5              | Ribosomal Protein L8<br>Pseudogene 5                           | Pseudo<br>gene | 9 | GC22P<br>035819 | 1.004<br>889 | <a href="https://www.genecards.org/cgi-bin/carddisp.pl?gene=RPL8P5">https://www.genecards.org/cgi-bin/carddisp.pl?gene=RPL8P5</a>                   |
| RPS2P29             | Ribosomal Protein S2<br>Pseudogene 29                          | Pseudo<br>gene | 9 | GC06M<br>066211 | 1.004<br>889 | <a href="https://www.genecards.org/cgi-bin/carddisp.pl?gene=RPS2P29">https://www.genecards.org/cgi-bin/carddisp.pl?gene=RPS2P29</a>                 |
| RPS5P3              | RPS5 Pseudogene 3                                              | Pseudo<br>gene | 9 | GC21M<br>033481 | 1.004<br>889 | <a href="https://www.genecards.org/cgi-bin/carddisp.pl?gene=RPS5P3">https://www.genecards.org/cgi-bin/carddisp.pl?gene=RPS5P3</a>                   |
| RTEL1P1             | Regulator Of Telomere<br>Elongation Helicase 1<br>Pseudogene 1 | Pseudo<br>gene | 9 | GC04P<br>112355 | 1.004<br>889 | <a href="https://www.genecards.org/cgi-bin/carddisp.pl?gene=RTEL1P1">https://www.genecards.org/cgi-bin/carddisp.pl?gene=RTEL1P1</a>                 |
| ALG1L11<br>P        | ALG1 Like 11,<br>Pseudogene                                    | Pseudo<br>gene | 8 | GC08P<br>012178 | 1.004<br>889 | <a href="https://www.genecards.org/cgi-bin/carddisp.pl?gene=ALG1L11P">https://www.genecards.org/cgi-bin/carddisp.pl?gene=ALG1L11P</a>               |
| DUTP6               | Deoxyuridine<br>Triphosphatase<br>Pseudogene 6                 | Pseudo<br>gene | 8 | GC01P<br>166838 | 1.004<br>889 | <a href="https://www.genecards.org/cgi-bin/carddisp.pl?gene=DUTP6">https://www.genecards.org/cgi-bin/carddisp.pl?gene=DUTP6</a>                     |
| ENSG000<br>00205537 | Novel Transcript,<br>Antisense To VDR                          | RNA<br>Gene    | 8 | GC12P<br>047883 | 1.004<br>889 | <a href="https://www.genecards.org/cgi-bin/carddisp.pl?gene=ENSG00000205537">https://www.genecards.org/cgi-bin/carddisp.pl?gene=ENSG00000205537</a> |
| ENSG000<br>00222529 | Y RNA                                                          | RNA<br>Gene    | 8 | GC11P<br>118970 | 1.004<br>889 | <a href="https://www.genecards.org/cgi-bin/carddisp.pl?gene=ENSG00000222529">https://www.genecards.org/cgi-bin/carddisp.pl?gene=ENSG00000222529</a> |
| ENSG000<br>00223808 | Novel Transcript                                               | RNA<br>Gene    | 8 | GC10P<br>008943 | 1.004<br>889 | <a href="https://www.genecards.org/cgi-bin/carddisp.pl?gene=ENSG00000223808">https://www.genecards.org/cgi-bin/carddisp.pl?gene=ENSG00000223808</a> |
| ENSG000<br>00224478 | Novel Transcript                                               | RNA<br>Gene    | 8 | GC06P<br>160537 | 1.004<br>889 | <a href="https://www.genecards.org/cgi-bin/carddisp.pl?gene=ENSG00000224478">https://www.genecards.org/cgi-bin/carddisp.pl?gene=ENSG00000224478</a> |
| ENSG000<br>00227217 | Novel Transcript                                               | RNA<br>Gene    | 8 | GC01P<br>157527 | 1.004<br>889 | <a href="https://www.genecards.org/cgi-bin/carddisp.pl?gene=ENSG00000227217">https://www.genecards.org/cgi-bin/carddisp.pl?gene=ENSG00000227217</a> |
| ENSG000<br>00230686 | Novel Transcript                                               | RNA<br>Gene    | 8 | GC02P<br>191017 | 1.004<br>889 | <a href="https://www.genecards.org/cgi-bin/carddisp.pl?gene=ENSG00000230686">https://www.genecards.org/cgi-bin/carddisp.pl?gene=ENSG00000230686</a> |
| ENSG000<br>00234211 | Novel Transcript,<br>Antisense To FCGR2B                       | RNA<br>Gene    | 8 | GC01M<br>161671 | 1.004<br>889 | <a href="https://www.genecards.org/cgi-bin/carddisp.pl?gene=ENSG00000234211">https://www.genecards.org/cgi-bin/carddisp.pl?gene=ENSG00000234211</a> |
| ENSG000<br>00235237 | Novel Transcript                                               | RNA<br>Gene    | 8 | GC22P<br>037166 | 1.004<br>889 | <a href="https://www.genecards.org/cgi-">https://www.genecards.org/cgi-</a>                                                                         |

|                 |                                                |          |   |             |          |                                                                                                                                                     |
|-----------------|------------------------------------------------|----------|---|-------------|----------|-----------------------------------------------------------------------------------------------------------------------------------------------------|
|                 |                                                |          |   |             |          | <a href="https://www.genecards.org/cgi-bin/carddisp.pl?gene=ENSG00000235237">bin/carddisp.pl?gene=ENSG00000235237</a>                               |
| ENSG00000235499 | Novel Transcript (LOC100132318)                | RNA Gene | 8 | GC02P073985 | 1.004889 | <a href="https://www.genecards.org/cgi-bin/carddisp.pl?gene=ENSG00000235499">https://www.genecards.org/cgi-bin/carddisp.pl?gene=ENSG00000235499</a> |
| ENSG00000236308 | Novel Transcript, Antisense To CHUK            | RNA Gene | 8 | GC10P100190 | 1.004889 | <a href="https://www.genecards.org/cgi-bin/carddisp.pl?gene=ENSG00000236308">https://www.genecards.org/cgi-bin/carddisp.pl?gene=ENSG00000236308</a> |
| ENSG00000238280 | Novel Transcript                               | RNA Gene | 8 | GC10M062682 | 1.004889 | <a href="https://www.genecards.org/cgi-bin/carddisp.pl?gene=ENSG00000238280">https://www.genecards.org/cgi-bin/carddisp.pl?gene=ENSG00000238280</a> |
| ENSG00000239791 | Novel Transcript                               | RNA Gene | 8 | GC16P041084 | 1.004889 | <a href="https://www.genecards.org/cgi-bin/carddisp.pl?gene=ENSG00000239791">https://www.genecards.org/cgi-bin/carddisp.pl?gene=ENSG00000239791</a> |
| ENSG00000254084 | Novel Transcript                               | RNA Gene | 8 | GC08M101411 | 1.004889 | <a href="https://www.genecards.org/cgi-bin/carddisp.pl?gene=ENSG00000254084">https://www.genecards.org/cgi-bin/carddisp.pl?gene=ENSG00000254084</a> |
| ENSG00000254397 | Novel Transcript                               | RNA Gene | 8 | GC11M009431 | 1.004889 | <a href="https://www.genecards.org/cgi-bin/carddisp.pl?gene=ENSG00000254397">https://www.genecards.org/cgi-bin/carddisp.pl?gene=ENSG00000254397</a> |
| ENSG00000255176 | Novel Transcript                               | RNA Gene | 8 | GC11P118636 | 1.004889 | <a href="https://www.genecards.org/cgi-bin/carddisp.pl?gene=ENSG00000255176">https://www.genecards.org/cgi-bin/carddisp.pl?gene=ENSG00000255176</a> |
| ENSG00000257985 | Novel Transcript, Antisense To A Novel Protein | RNA Gene | 8 | GC12P048011 | 1.004889 | <a href="https://www.genecards.org/cgi-bin/carddisp.pl?gene=ENSG00000257985">https://www.genecards.org/cgi-bin/carddisp.pl?gene=ENSG00000257985</a> |
| ENSG00000259598 | Novel Transcript, Antisense To RASGRP1         | RNA Gene | 8 | GC15P038524 | 1.004889 | <a href="https://www.genecards.org/cgi-bin/carddisp.pl?gene=ENSG00000259598">https://www.genecards.org/cgi-bin/carddisp.pl?gene=ENSG00000259598</a> |
| ENSG00000259840 | Novel Transcript                               | RNA Gene | 8 | GC16M007030 | 1.004889 | <a href="https://www.genecards.org/cgi-bin/carddisp.pl?gene=ENSG00000259840">https://www.genecards.org/cgi-bin/carddisp.pl?gene=ENSG00000259840</a> |
| ENSG00000260304 | Novel Transcript, Antisense To FUS             | RNA Gene | 8 | GC16M031180 | 1.004889 | <a href="https://www.genecards.org/cgi-bin/carddisp.pl?gene=ENSG00000260304">https://www.genecards.org/cgi-bin/carddisp.pl?gene=ENSG00000260304</a> |
| ENSG00000260482 | Novel Transcript                               | RNA Gene | 8 | GC16P023641 | 1.004889 | <a href="https://www.genecards.org/cgi-bin/carddisp.pl?gene=ENSG00000260482">https://www.genecards.org/cgi-bin/carddisp.pl?gene=ENSG00000260482</a> |
| ENSG00000262420 | Novel Transcript, Antisense To TXNDC11         | RNA Gene | 8 | GC16P011741 | 1.004889 | <a href="https://www.genecards.org/cgi-bin/carddisp.pl?gene=ENSG00000262420">https://www.genecards.org/cgi-bin/carddisp.pl?gene=ENSG00000262420</a> |

|                 |                                                        |                |   |             |          |                                                                                                                                                     |
|-----------------|--------------------------------------------------------|----------------|---|-------------|----------|-----------------------------------------------------------------------------------------------------------------------------------------------------|
| ENSG00000263220 | Novel Transcript, Antisense To RABEP1                  | RNA Gene       | 8 | GC17M005364 | 1.004889 | <a href="https://www.genecards.org/cgi-bin/carddisp.pl?gene=ENSG00000263220">https://www.genecards.org/cgi-bin/carddisp.pl?gene=ENSG00000263220</a> |
| ENSG00000267303 | Novel Transcript                                       | Protein Coding | 8 | GC19M010315 | 1.004889 | <a href="https://www.genecards.org/cgi-bin/carddisp.pl?gene=ENSG00000267303">https://www.genecards.org/cgi-bin/carddisp.pl?gene=ENSG00000267303</a> |
| ENSG00000269514 | Novel Transcript, Antisense To OR10AD1                 | RNA Gene       | 8 | GC12P048198 | 1.004889 | <a href="https://www.genecards.org/cgi-bin/carddisp.pl?gene=ENSG00000269514">https://www.genecards.org/cgi-bin/carddisp.pl?gene=ENSG00000269514</a> |
| ENSG00000269667 | Novel Transcript                                       | RNA Gene       | 8 | GC16P085990 | 1.004889 | <a href="https://www.genecards.org/cgi-bin/carddisp.pl?gene=ENSG00000269667">https://www.genecards.org/cgi-bin/carddisp.pl?gene=ENSG00000269667</a> |
| ENSG00000270120 | Novel Transcript                                       | RNA Gene       | 8 | GC16P050712 | 1.004889 | <a href="https://www.genecards.org/cgi-bin/carddisp.pl?gene=ENSG00000270120">https://www.genecards.org/cgi-bin/carddisp.pl?gene=ENSG00000270120</a> |
| ENSG00000271553 | Novel Transcript                                       | RNA Gene       | 8 | GC07P128667 | 1.004889 | <a href="https://www.genecards.org/cgi-bin/carddisp.pl?gene=ENSG00000271553">https://www.genecards.org/cgi-bin/carddisp.pl?gene=ENSG00000271553</a> |
| ETV7-AS1        | ETV7 And PTX1 Antisense RNA 1                          | RNA Gene       | 8 | GC06P084401 | 1.004889 | <a href="https://www.genecards.org/cgi-bin/carddisp.pl?gene=ETV7-AS1">https://www.genecards.org/cgi-bin/carddisp.pl?gene=ETV7-AS1</a>               |
| GAPDHP64        | Glyceraldehyde-3-Phosphate Dehydrogenase Pseudogene 64 | Pseudo gene    | 8 | GC01M116713 | 1.004889 | <a href="https://www.genecards.org/cgi-bin/carddisp.pl?gene=GAPDHP64">https://www.genecards.org/cgi-bin/carddisp.pl?gene=GAPDHP64</a>               |
| GLULP4          | Glutamate-Ammonia Ligase Pseudogene 4                  | Pseudo gene    | 8 | GC09P034917 | 1.004889 | <a href="https://www.genecards.org/cgi-bin/carddisp.pl?gene=GLULP4">https://www.genecards.org/cgi-bin/carddisp.pl?gene=GLULP4</a>                   |
| LINC02498       | Long Intergenic Non-Protein Coding RNA 2498            | RNA Gene       | 8 | GC04P018282 | 1.004889 | <a href="https://www.genecards.org/cgi-bin/carddisp.pl?gene=LINC02498">https://www.genecards.org/cgi-bin/carddisp.pl?gene=LINC02498</a>             |
| LINC02621       | Long Intergenic Non-Protein Coding RNA 2621            | RNA Gene       | 8 | GC10P062302 | 1.004889 | <a href="https://www.genecards.org/cgi-bin/carddisp.pl?gene=LINC02621">https://www.genecards.org/cgi-bin/carddisp.pl?gene=LINC02621</a>             |
| LINC02865       | Long Intergenic Non-Protein Coding RNA 2865            | RNA Gene       | 8 | GC06P137946 | 1.004889 | <a href="https://www.genecards.org/cgi-bin/carddisp.pl?gene=LINC02865">https://www.genecards.org/cgi-bin/carddisp.pl?gene=LINC02865</a>             |
| LINC02943       | Long Intergenic Non-Protein Coding RNA 2943            | RNA Gene       | 8 | GC21M039034 | 1.004889 | <a href="https://www.genecards.org/cgi-bin/carddisp.pl?gene=LINC02943">https://www.genecards.org/cgi-bin/carddisp.pl?gene=LINC02943</a>             |
| LOC101928272    | Uncharacterized LOC101928272                           | RNA Gene       | 8 | GC10M008849 | 1.004889 | <a href="https://www.genecards.org/cgi-bin/carddisp.pl?gene=LOC101928272">https://www.genecards.org/cgi-bin/carddisp.pl?gene=LOC101928272</a>       |

|              |                                                              |             |   |             |          |                                                                                                                                                      |
|--------------|--------------------------------------------------------------|-------------|---|-------------|----------|------------------------------------------------------------------------------------------------------------------------------------------------------|
|              |                                                              |             |   |             |          | <a href="http://www.ncbi.nlm.nih.gov/ncbi/cdd/bin/carddisp.pl?gene=LOC101928272">bin/carddisp.pl?gene=LOC101928272</a>                               |
| LOC124902827 | Small Nucleolar RNA U13                                      | RNA Gene    | 8 | GC11P009588 | 1.004889 | <a href="http://www.ncbi.nlm.nih.gov/ncbi/cdd/bin/carddisp.pl?gene=LOC124902827">https://www.genecards.org/cgi-bin/carddisp.pl?gene=LOC124902827</a> |
| PHB1P9       | PHB1 Pseudogene 9                                            | Pseudo gene | 8 | GC10P100251 | 1.004889 | <a href="http://www.ncbi.nlm.nih.gov/ncbi/cdd/bin/carddisp.pl?gene=PHB1P9">https://www.genecards.org/cgi-bin/carddisp.pl?gene=PHB1P9</a>             |
| RN7SL38P     | RNA, 7SL, Cytoplasmic 38, Pseudogene                         | Pseudo gene | 8 | GC12P024706 | 1.004889 | <a href="http://www.ncbi.nlm.nih.gov/ncbi/cdd/bin/carddisp.pl?gene=RN7SL38P">https://www.genecards.org/cgi-bin/carddisp.pl?gene=RN7SL38P</a>         |
| RN7SL688P    | RNA, 7SL, Cytoplasmic 688, Pseudogene                        | Pseudo gene | 8 | GC11P118931 | 1.004889 | <a href="http://www.ncbi.nlm.nih.gov/ncbi/cdd/bin/carddisp.pl?gene=RN7SL688P">https://www.genecards.org/cgi-bin/carddisp.pl?gene=RN7SL688P</a>       |
| RNU4ATAC4P   | RNA, U4atac Small Nuclear 4, Pseudogene                      | Pseudo gene | 8 | GC01M067267 | 1.004889 | <a href="http://www.ncbi.nlm.nih.gov/ncbi/cdd/bin/carddisp.pl?gene=RNU4ATAC4P">https://www.genecards.org/cgi-bin/carddisp.pl?gene=RNU4ATAC4P</a>     |
| RNU6-1035P   | RNA, U6 Small Nuclear 1035, Pseudogene                       | Pseudo gene | 8 | GC09M081725 | 1.004889 | <a href="http://www.ncbi.nlm.nih.gov/ncbi/cdd/bin/carddisp.pl?gene=RNU6-1035P">https://www.genecards.org/cgi-bin/carddisp.pl?gene=RNU6-1035P</a>     |
| RNU6-1149P   | RNA, U6 Small Nuclear 1149, Pseudogene                       | Pseudo gene | 8 | GC21M042423 | 1.004889 | <a href="http://www.ncbi.nlm.nih.gov/ncbi/cdd/bin/carddisp.pl?gene=RNU6-1149P">https://www.genecards.org/cgi-bin/carddisp.pl?gene=RNU6-1149P</a>     |
| RNU6-387P    | RNA, U6 Small Nuclear 387, Pseudogene                        | Pseudo gene | 8 | GC01P067417 | 1.004889 | <a href="http://www.ncbi.nlm.nih.gov/ncbi/cdd/bin/carddisp.pl?gene=RNU6-387P">https://www.genecards.org/cgi-bin/carddisp.pl?gene=RNU6-387P</a>       |
| RNU6-481P    | RNA, U6 Small Nuclear 481, Pseudogene                        | Pseudo gene | 8 | GC01P161401 | 1.004889 | <a href="http://www.ncbi.nlm.nih.gov/ncbi/cdd/bin/carddisp.pl?gene=RNU6-481P">https://www.genecards.org/cgi-bin/carddisp.pl?gene=RNU6-481P</a>       |
| RNU6-704P    | RNA, U6 Small Nuclear 704, Pseudogene                        | Pseudo gene | 8 | GC01M200904 | 1.004889 | <a href="http://www.ncbi.nlm.nih.gov/ncbi/cdd/bin/carddisp.pl?gene=RNU6-704P">https://www.genecards.org/cgi-bin/carddisp.pl?gene=RNU6-704P</a>       |
| RNU6-979P    | RNA, U6 Small Nuclear 979, Pseudogene                        | Pseudo gene | 8 | GC07M028119 | 1.004889 | <a href="http://www.ncbi.nlm.nih.gov/ncbi/cdd/bin/carddisp.pl?gene=RNU6-979P">https://www.genecards.org/cgi-bin/carddisp.pl?gene=RNU6-979P</a>       |
| RNY4P14      | RNY4 Pseudogene 14                                           | Pseudo gene | 8 | GC13M039785 | 1.004889 | <a href="http://www.ncbi.nlm.nih.gov/ncbi/cdd/bin/carddisp.pl?gene=RNY4P14">https://www.genecards.org/cgi-bin/carddisp.pl?gene=RNY4P14</a>           |
| UQCRC2P1     | Ubiquinol-Cytochrome C Reductase Core Protein 2 Pseudogene 1 | Pseudo gene | 8 | GC03M046311 | 1.004889 | <a href="http://www.ncbi.nlm.nih.gov/ncbi/cdd/bin/carddisp.pl?gene=UQCRC2P1">https://www.genecards.org/cgi-bin/carddisp.pl?gene=UQCRC2P1</a>         |

|                 |                                             |                |   |             |          |                                                                                                                                                     |
|-----------------|---------------------------------------------|----------------|---|-------------|----------|-----------------------------------------------------------------------------------------------------------------------------------------------------|
| ENSG00000200998 | Y RNA                                       | RNA Gene       | 7 | GC04M078632 | 1.004889 | <a href="https://www.genecards.org/cgi-bin/carddisp.pl?gene=ENSG00000200998">https://www.genecards.org/cgi-bin/carddisp.pl?gene=ENSG00000200998</a> |
| ENSG00000226032 | Novel Transcript                            | RNA Gene       | 7 | GC06M159042 | 1.004889 | <a href="https://www.genecards.org/cgi-bin/carddisp.pl?gene=ENSG00000226032">https://www.genecards.org/cgi-bin/carddisp.pl?gene=ENSG00000226032</a> |
| ENSG00000232693 | Novel Transcript, Sense Intronic To SPRED2  | RNA Gene       | 7 | GC02M065373 | 1.004889 | <a href="https://www.genecards.org/cgi-bin/carddisp.pl?gene=ENSG00000232693">https://www.genecards.org/cgi-bin/carddisp.pl?gene=ENSG00000232693</a> |
| ENSG00000245008 | Novel Transcript, Antisense To FLI1         | Uncategorized  | 7 | GC11M128616 | 1.004889 | <a href="https://www.genecards.org/cgi-bin/carddisp.pl?gene=ENSG00000245008">https://www.genecards.org/cgi-bin/carddisp.pl?gene=ENSG00000245008</a> |
| ENSG00000254024 | Novel Transcript                            | RNA Gene       | 7 | GC08M101461 | 1.004889 | <a href="https://www.genecards.org/cgi-bin/carddisp.pl?gene=ENSG00000254024">https://www.genecards.org/cgi-bin/carddisp.pl?gene=ENSG00000254024</a> |
| ENSG00000257955 | Novel Transcript                            | RNA Gene       | 7 | GC12M048021 | 1.004889 | <a href="https://www.genecards.org/cgi-bin/carddisp.pl?gene=ENSG00000257955">https://www.genecards.org/cgi-bin/carddisp.pl?gene=ENSG00000257955</a> |
| ENSG00000267287 | Novel Transcript                            | Uncategorized  | 7 | GC18P079577 | 1.004889 | <a href="https://www.genecards.org/cgi-bin/carddisp.pl?gene=ENSG00000267287">https://www.genecards.org/cgi-bin/carddisp.pl?gene=ENSG00000267287</a> |
| ENSG00000285163 | Novel Transcript                            | RNA Gene       | 7 | GC16P085924 | 1.004889 | <a href="https://www.genecards.org/cgi-bin/carddisp.pl?gene=ENSG00000285163">https://www.genecards.org/cgi-bin/carddisp.pl?gene=ENSG00000285163</a> |
| ENSG00000287564 | Novel Transcript                            | RNA Gene       | 7 | GC10P031057 | 1.004889 | <a href="https://www.genecards.org/cgi-bin/carddisp.pl?gene=ENSG00000287564">https://www.genecards.org/cgi-bin/carddisp.pl?gene=ENSG00000287564</a> |
| LDHAP3          | Lactate Dehydrogenase A Pseudogene 3        | Pseudogene     | 7 | GC02P041819 | 1.004889 | <a href="https://www.genecards.org/cgi-bin/carddisp.pl?gene=LDHAP3">https://www.genecards.org/cgi-bin/carddisp.pl?gene=LDHAP3</a>                   |
| LINC02786       | Long Intergenic Non-Protein Coding RNA 2786 | RNA Gene       | 7 | GC01M038132 | 1.004889 | <a href="https://www.genecards.org/cgi-bin/carddisp.pl?gene=LINC02786">https://www.genecards.org/cgi-bin/carddisp.pl?gene=LINC02786</a>             |
| LOC101927180    | V-Type Proton ATPase Subunit F-Like         | Protein Coding | 7 | GC12P048084 | 1.004889 | <a href="https://www.genecards.org/cgi-bin/carddisp.pl?gene=LOC101927180">https://www.genecards.org/cgi-bin/carddisp.pl?gene=LOC101927180</a>       |
| RN7SL563P       | RNA, 7SL, Cytoplasmic 563, Pseudogene       | Pseudogene     | 7 | GC08M101397 | 1.004889 | <a href="https://www.genecards.org/cgi-bin/carddisp.pl?gene=RN7SL563P">https://www.genecards.org/cgi-bin/carddisp.pl?gene=RN7SL563P</a>             |
| RNU6-376P       | RNA, U6 Small Nuclear 376, Pseudogene       | Pseudogene     | 7 | GC11P118702 | 1.004889 | <a href="https://www.genecards.org/cgi-">https://www.genecards.org/cgi-</a>                                                                         |

|                 |                                                                               |               |   |             |          |                                                                                                                                                    |
|-----------------|-------------------------------------------------------------------------------|---------------|---|-------------|----------|----------------------------------------------------------------------------------------------------------------------------------------------------|
|                 |                                                                               |               |   |             |          | <a href="http://www.genecards.org/cgi-bin/carddisp.pl?gene=RNU6-376P">bin/carddisp.pl?gene=RNU6-376P</a>                                           |
| RNU7-133P       | RNA, U7 Small Nuclear 133 Pseudogene                                          | Pseudo gene   | 7 | GC06P014166 | 1.004889 | <a href="http://www.genecards.org/cgi-bin/carddisp.pl?gene=RNU7-133P">https://www.genecards.org/cgi-bin/carddisp.pl?gene=RNU7-133P</a>             |
| RPL6P8          | Ribosomal Protein L6 Pseudogene 8                                             | Pseudo gene   | 7 | GC03P160579 | 1.004889 | <a href="http://www.genecards.org/cgi-bin/carddisp.pl?gene=RPL6P8">https://www.genecards.org/cgi-bin/carddisp.pl?gene=RPL6P8</a>                   |
| SETP16          | SET Pseudogene 16                                                             | Pseudo gene   | 7 | GC11M118833 | 1.004889 | <a href="http://www.genecards.org/cgi-bin/carddisp.pl?gene=SETP16">https://www.genecards.org/cgi-bin/carddisp.pl?gene=SETP16</a>                   |
| lnc-LEF1-1      |                                                                               | RNA Gene      | 7 | GC04M108048 | 1.004889 | <a href="http://www.genecards.org/cgi-bin/carddisp.pl?gene=lnc-LEF1-1">https://www.genecards.org/cgi-bin/carddisp.pl?gene=lnc-LEF1-1</a>           |
| BTF3L4P3        | Basic Transcription Factor 3 Like 4 Pseudogene 3                              | Pseudo gene   | 6 | GC06M137543 | 1.004889 | <a href="http://www.genecards.org/cgi-bin/carddisp.pl?gene=BTF3L4P3">https://www.genecards.org/cgi-bin/carddisp.pl?gene=BTF3L4P3</a>               |
| CDKN2AIPNLP3    | CDKN2A Interacting Protein N-Terminal Like Pseudogene 3                       | Pseudo gene   | 6 | GC13M039817 | 1.004889 | <a href="http://www.genecards.org/cgi-bin/carddisp.pl?gene=CDKN2AIPNLP3">https://www.genecards.org/cgi-bin/carddisp.pl?gene=CDKN2AIPNLP3</a>       |
| ENSG00000225931 | Novel Transcript                                                              | Uncategorized | 6 | GC01P002566 | 1.004889 | <a href="http://www.genecards.org/cgi-bin/carddisp.pl?gene=ENSG00000225931">https://www.genecards.org/cgi-bin/carddisp.pl?gene=ENSG00000225931</a> |
| ENSG00000242162 | Pseudogene Similar To Part Of Sec61 Alpha 1 Subunit (S. Cerevisiae) (SEC61A1) | Pseudo gene   | 6 | GC07M129066 | 1.004889 | <a href="http://www.genecards.org/cgi-bin/carddisp.pl?gene=ENSG00000242162">https://www.genecards.org/cgi-bin/carddisp.pl?gene=ENSG00000242162</a> |
| ENSG00000245869 | Novel Transcript, Antisense To CXCR5                                          | RNA Gene      | 6 | GC11M118887 | 1.004889 | <a href="http://www.genecards.org/cgi-bin/carddisp.pl?gene=ENSG00000245869">https://www.genecards.org/cgi-bin/carddisp.pl?gene=ENSG00000245869</a> |
| ENSG00000253067 |                                                                               | RNA Gene      | 6 | GC05P132080 | 1.004889 | <a href="http://www.genecards.org/cgi-bin/carddisp.pl?gene=ENSG00000253067">https://www.genecards.org/cgi-bin/carddisp.pl?gene=ENSG00000253067</a> |
| ENSG00000273245 | Novel Transcript                                                              | RNA Gene      | 6 | GC02M073750 | 1.004889 | <a href="http://www.genecards.org/cgi-bin/carddisp.pl?gene=ENSG00000273245">https://www.genecards.org/cgi-bin/carddisp.pl?gene=ENSG00000273245</a> |
| ENSG00000273300 | Novel Transcript, Antisense To UFD1L                                          | RNA Gene      | 6 | GC22P019454 | 1.004889 | <a href="http://www.genecards.org/cgi-bin/carddisp.pl?gene=ENSG00000273300">https://www.genecards.org/cgi-bin/carddisp.pl?gene=ENSG00000273300</a> |
| ENSG00000273342 | Novel Transcript                                                              | RNA Gene      | 6 | GC22P035925 | 1.004889 | <a href="http://www.genecards.org/cgi-bin/carddisp.pl?gene=ENSG00000273342">https://www.genecards.org/cgi-bin/carddisp.pl?gene=ENSG00000273342</a> |

|                 |                                              |                |   |             |          |                                                                                                                                                     |
|-----------------|----------------------------------------------|----------------|---|-------------|----------|-----------------------------------------------------------------------------------------------------------------------------------------------------|
| ENSG00000284825 | Novel Transcript                             | RNA Gene       | 6 | GC06M167116 | 1.004889 | <a href="https://www.genecards.org/cgi-bin/carddisp.pl?gene=ENSG00000284825">https://www.genecards.org/cgi-bin/carddisp.pl?gene=ENSG00000284825</a> |
| ENSG00000284957 | Novel Transcript                             | RNA Gene       | 6 | GC08M011479 | 1.004889 | <a href="https://www.genecards.org/cgi-bin/carddisp.pl?gene=ENSG00000284957">https://www.genecards.org/cgi-bin/carddisp.pl?gene=ENSG00000284957</a> |
| ENSG00000285040 | Novel Transcript                             | RNA Gene       | 6 | GC16M085963 | 1.004889 | <a href="https://www.genecards.org/cgi-bin/carddisp.pl?gene=ENSG00000285040">https://www.genecards.org/cgi-bin/carddisp.pl?gene=ENSG00000285040</a> |
| ENSG00000288583 | Novel Transcript                             | RNA Gene       | 6 | GC09P047456 | 1.004889 | <a href="https://www.genecards.org/cgi-bin/carddisp.pl?gene=ENSG00000288583">https://www.genecards.org/cgi-bin/carddisp.pl?gene=ENSG00000288583</a> |
| ENSG00000288749 | Novel Transcript                             | RNA Gene       | 6 | GC07P101291 | 1.004889 | <a href="https://www.genecards.org/cgi-bin/carddisp.pl?gene=ENSG00000288749">https://www.genecards.org/cgi-bin/carddisp.pl?gene=ENSG00000288749</a> |
| ENSG00000288915 | Novel Transcript, Antisense To PRKCQ         | RNA Gene       | 6 | GC10P006493 | 1.004889 | <a href="https://www.genecards.org/cgi-bin/carddisp.pl?gene=ENSG00000288915">https://www.genecards.org/cgi-bin/carddisp.pl?gene=ENSG00000288915</a> |
| ENSG00000289398 | Novel Transcript                             | RNA Gene       | 6 | GC11P128313 | 1.004889 | <a href="https://www.genecards.org/cgi-bin/carddisp.pl?gene=ENSG00000289398">https://www.genecards.org/cgi-bin/carddisp.pl?gene=ENSG00000289398</a> |
| ENSG00000289525 | Novel Transcript                             | RNA Gene       | 6 | GC15M090911 | 1.004889 | <a href="https://www.genecards.org/cgi-bin/carddisp.pl?gene=ENSG00000289525">https://www.genecards.org/cgi-bin/carddisp.pl?gene=ENSG00000289525</a> |
| H3P5            | H3 Histone Pseudogene 5                      | Pseudo gene    | 6 | GC02P030211 | 1.004889 | <a href="https://www.genecards.org/cgi-bin/carddisp.pl?gene=H3P5">https://www.genecards.org/cgi-bin/carddisp.pl?gene=H3P5</a>                       |
| HSALNG0036266   |                                              | RNA Gene       | 6 | GC04P108027 | 1.004889 | <a href="https://www.genecards.org/cgi-bin/carddisp.pl?gene=HSALNG0036266">https://www.genecards.org/cgi-bin/carddisp.pl?gene=HSALNG0036266</a>     |
| HSALNG0057943   |                                              | RNA Gene       | 6 | GC07M050313 | 1.004889 | <a href="https://www.genecards.org/cgi-bin/carddisp.pl?gene=HSALNG0057943">https://www.genecards.org/cgi-bin/carddisp.pl?gene=HSALNG0057943</a>     |
| KNOP1P1         | Lysine Rich Nucleolar Protein 1 Pseudogene 1 | Pseudo gene    | 6 | GC12P024583 | 1.004889 | <a href="https://www.genecards.org/cgi-bin/carddisp.pl?gene=KNOP1P1">https://www.genecards.org/cgi-bin/carddisp.pl?gene=KNOP1P1</a>                 |
| LOC124900752    | Uncharacterized LOC124900752                 | Protein Coding | 6 | GC04P108168 | 1.004889 | <a href="https://www.genecards.org/cgi-bin/carddisp.pl?gene=LOC124900752">https://www.genecards.org/cgi-bin/carddisp.pl?gene=LOC124900752</a>       |
| LOC124901411    | Uncharacterized LOC124901411                 | RNA Gene       | 6 | GC06P137695 | 1.004889 | <a href="https://www.genecards.org/cgi-bin/carddisp.pl?gene=LOC124901411">https://www.genecards.org/cgi-bin/carddisp.pl?gene=LOC124901411</a>       |

|                 |                                                |                |   |             |          |                                                                                                                                                            |
|-----------------|------------------------------------------------|----------------|---|-------------|----------|------------------------------------------------------------------------------------------------------------------------------------------------------------|
|                 |                                                |                |   |             |          | <a href="http://www.ncbi.nlm.nih.gov/ncbi/cdd/bin/carddisp.pl?gene=LOC124901411">bin/carddisp.pl?gene=LOC124901411</a>                                     |
| LOC124904333    | Octapeptide-Repeat Protein T2-Like             | Protein Coding | 6 | GC18P079419 | 1.004889 | <a href="http://www.ncbi.nlm.nih.gov/ncbi/cdd/bin/carddisp.pl?gene=LOC124904333">https://www.genecards.org/cgi-bin/carddisp.pl?gene=LOC124904333</a>       |
| NONHSAG005220.2 |                                                | RNA Gene       | 6 | GC10P011006 | 1.004889 | <a href="http://www.ncbi.nlm.nih.gov/ncbi/cdd/bin/carddisp.pl?gene=NONHSAG005220.2">https://www.genecards.org/cgi-bin/carddisp.pl?gene=NONHSAG005220.2</a> |
| NPM1P33         | Nucleophosmin 1 Pseudogene 33                  | Pseudo gene    | 6 | GC02M203772 | 1.004889 | <a href="http://www.ncbi.nlm.nih.gov/ncbi/cdd/bin/carddisp.pl?gene=NPM1P33">https://www.genecards.org/cgi-bin/carddisp.pl?gene=NPM1P33</a>                 |
| P2RY10BP        | P2Y Receptor Family Member 10B, Pseudogene     | Pseudo gene    | 6 | GC0XP079085 | 1.004889 | <a href="http://www.ncbi.nlm.nih.gov/ncbi/cdd/bin/carddisp.pl?gene=P2RY10BP">https://www.genecards.org/cgi-bin/carddisp.pl?gene=P2RY10BP</a>               |
| POLR3GP2        | RNA Polymerase III Subunit G Pseudogene 2      | Pseudo gene    | 6 | GC18P048478 | 1.004889 | <a href="http://www.ncbi.nlm.nih.gov/ncbi/cdd/bin/carddisp.pl?gene=POLR3GP2">https://www.genecards.org/cgi-bin/carddisp.pl?gene=POLR3GP2</a>               |
| RF00017-7224    |                                                | RNA Gene       | 6 | GC09M094967 | 1.004889 | <a href="http://www.ncbi.nlm.nih.gov/ncbi/cdd/bin/carddisp.pl?gene=RF00017-7224">https://www.genecards.org/cgi-bin/carddisp.pl?gene=RF00017-7224</a>       |
| RN7SL335P       | RNA, 7SL, Cytoplasmic 335, Pseudogene          | Pseudo gene    | 6 | GC04M122087 | 1.004889 | <a href="http://www.ncbi.nlm.nih.gov/ncbi/cdd/bin/carddisp.pl?gene=RN7SL335P">https://www.genecards.org/cgi-bin/carddisp.pl?gene=RN7SL335P</a>             |
| RNA5SP287       | RNA, 5S Ribosomal Pseudogene 287               | Pseudo gene    | 6 | GC09P081885 | 1.004889 | <a href="http://www.ncbi.nlm.nih.gov/ncbi/cdd/bin/carddisp.pl?gene=RNA5SP287">https://www.genecards.org/cgi-bin/carddisp.pl?gene=RNA5SP287</a>             |
| RNU1-61P        | RNA, U1 Small Nuclear 61, Pseudogene           | Pseudo gene    | 6 | GC06M032549 | 1.004889 | <a href="http://www.ncbi.nlm.nih.gov/ncbi/cdd/bin/carddisp.pl?gene=RNU1-61P">https://www.genecards.org/cgi-bin/carddisp.pl?gene=RNU1-61P</a>               |
| RNU6-420P       | RNA, U6 Small Nuclear 420, Pseudogene          | Pseudo gene    | 6 | GC04P022121 | 1.004889 | <a href="http://www.ncbi.nlm.nih.gov/ncbi/cdd/bin/carddisp.pl?gene=RNU6-420P">https://www.genecards.org/cgi-bin/carddisp.pl?gene=RNU6-420P</a>             |
| RPS2P9          | Ribosomal Protein S2 Pseudogene 9              | Pseudo gene    | 6 | GC01P198950 | 1.004889 | <a href="http://www.ncbi.nlm.nih.gov/ncbi/cdd/bin/carddisp.pl?gene=RPS2P9">https://www.genecards.org/cgi-bin/carddisp.pl?gene=RPS2P9</a>                   |
| TREHP1          | Trehalase Pseudogene 1                         | Pseudo gene    | 6 | GC11M118688 | 1.004889 | <a href="http://www.ncbi.nlm.nih.gov/ncbi/cdd/bin/carddisp.pl?gene=TREHP1">https://www.genecards.org/cgi-bin/carddisp.pl?gene=TREHP1</a>                   |
| VDAC1P9         | Voltage Dependent Anion Channel 1 Pseudogene 9 | Pseudo gene    | 6 | GC01M157724 | 1.004889 | <a href="http://www.ncbi.nlm.nih.gov/ncbi/cdd/bin/carddisp.pl?gene=VDAC1P9">https://www.genecards.org/cgi-bin/carddisp.pl?gene=VDAC1P9</a>                 |



|                  |          |   |             |          |                                                                                                                                                       |
|------------------|----------|---|-------------|----------|-------------------------------------------------------------------------------------------------------------------------------------------------------|
| hsa-miR-5096-032 | RNA Gene | 6 | GC05M054039 | 1.004889 | <a href="https://www.genecards.org/cgi-bin/carddisp.pl?gene=hsa-miR-5096-032">https://www.genecards.org/cgi-bin/carddisp.pl?gene=hsa-miR-5096-032</a> |
| lnc-ALPK1-2      | RNA Gene | 6 | GC04P112286 | 1.004889 | <a href="https://www.genecards.org/cgi-bin/carddisp.pl?gene=lnc-ALPK1-2">https://www.genecards.org/cgi-bin/carddisp.pl?gene=lnc-ALPK1-2</a>           |
| lnc-ANXA6-3      | RNA Gene | 6 | GC05M151030 | 1.004889 | <a href="https://www.genecards.org/cgi-bin/carddisp.pl?gene=lnc-ANXA6-3">https://www.genecards.org/cgi-bin/carddisp.pl?gene=lnc-ANXA6-3</a>           |
| lnc-CD247-1      | RNA Gene | 6 | GC01M167430 | 1.004889 | <a href="https://www.genecards.org/cgi-bin/carddisp.pl?gene=lnc-CD247-1">https://www.genecards.org/cgi-bin/carddisp.pl?gene=lnc-CD247-1</a>           |
| lnc-FAM76B-1     | RNA Gene | 6 | GC11M095571 | 1.004889 | <a href="https://www.genecards.org/cgi-bin/carddisp.pl?gene=lnc-FAM76B-1">https://www.genecards.org/cgi-bin/carddisp.pl?gene=lnc-FAM76B-1</a>         |
| lnc-IL10-5       | RNA Gene | 6 | GC01M206769 | 1.004889 | <a href="https://www.genecards.org/cgi-bin/carddisp.pl?gene=lnc-IL10-5">https://www.genecards.org/cgi-bin/carddisp.pl?gene=lnc-IL10-5</a>             |
| lnc-KCNE1-1      | RNA Gene | 6 | GC21M034577 | 1.004889 | <a href="https://www.genecards.org/cgi-bin/carddisp.pl?gene=lnc-KCNE1-1">https://www.genecards.org/cgi-bin/carddisp.pl?gene=lnc-KCNE1-1</a>           |
| lnc-MAP3K7-3     | RNA Gene | 6 | GC06M090088 | 1.004889 | <a href="https://www.genecards.org/cgi-bin/carddisp.pl?gene=lnc-MAP3K7-3">https://www.genecards.org/cgi-bin/carddisp.pl?gene=lnc-MAP3K7-3</a>         |
| lnc-PRDM1-3      | RNA Gene | 6 | GC06P106132 | 1.004889 | <a href="https://www.genecards.org/cgi-bin/carddisp.pl?gene=lnc-PRDM1-3">https://www.genecards.org/cgi-bin/carddisp.pl?gene=lnc-PRDM1-3</a>           |
| lnc-RCAN1-1      | RNA Gene | 6 | GC21M034514 | 1.004889 | <a href="https://www.genecards.org/cgi-bin/carddisp.pl?gene=lnc-RCAN1-1">https://www.genecards.org/cgi-bin/carddisp.pl?gene=lnc-RCAN1-1</a>           |
| lnc-RCSD1-5      | RNA Gene | 6 | GC01P167418 | 1.004889 | <a href="https://www.genecards.org/cgi-bin/carddisp.pl?gene=lnc-RCSD1-5">https://www.genecards.org/cgi-bin/carddisp.pl?gene=lnc-RCSD1-5</a>           |
| lnc-SBF2-3       | RNA Gene | 6 | GC11M009760 | 1.004889 | <a href="https://www.genecards.org/cgi-bin/carddisp.pl?gene=lnc-SBF2-3">https://www.genecards.org/cgi-bin/carddisp.pl?gene=lnc-SBF2-3</a>             |
| lnc-TMEM50B-3    | RNA Gene | 6 | GC21M033384 | 1.004889 | <a href="https://www.genecards.org/cgi-bin/carddisp.pl?gene=lnc-TMEM50B-3">https://www.genecards.org/cgi-bin/carddisp.pl?gene=lnc-TMEM50B-3</a>       |
| lnc-VPS37C-3     | RNA Gene | 6 | GC11M089558 | 1.004889 | <a href="https://www.genecards.org/cgi-bin/carddisp.pl?gene=lnc-VPS37C-3">https://www.genecards.org/cgi-bin/carddisp.pl?gene=lnc-VPS37C-3</a>         |

|                 |                                                                                   |               |   |             |          |                                                                                                                                                     |
|-----------------|-----------------------------------------------------------------------------------|---------------|---|-------------|----------|-----------------------------------------------------------------------------------------------------------------------------------------------------|
|                 |                                                                                   |               |   |             |          | <a href="#">bin/carddisp.pl?gene=1nc-VPS37C-3</a>                                                                                                   |
| ENSG00000197376 | Biorientation Of Chromosomes In Cell Division 1 Like 2 (BOD1L2) Pseudogene        | Pseudo gene   | 5 | GC12P048508 | 1.004889 | <a href="https://www.genecards.org/cgi-bin/carddisp.pl?gene=ENSG00000197376">https://www.genecards.org/cgi-bin/carddisp.pl?gene=ENSG00000197376</a> |
| ENSG00000220614 | Ribosomal Protein L34 (RPL34) Pseudogene                                          | Pseudo gene   | 5 | GC06P083919 | 1.004889 | <a href="https://www.genecards.org/cgi-bin/carddisp.pl?gene=ENSG00000220614">https://www.genecards.org/cgi-bin/carddisp.pl?gene=ENSG00000220614</a> |
| ENSG00000224163 | Pseudogene Similar To Part Of Filamin C, Gamma (Actin Binding Protein 280) (FLNC) | Pseudo gene   | 5 | GC07M128915 | 1.004889 | <a href="https://www.genecards.org/cgi-bin/carddisp.pl?gene=ENSG00000224163">https://www.genecards.org/cgi-bin/carddisp.pl?gene=ENSG00000224163</a> |
| ENSG00000233196 | Novel Pseudogene                                                                  | Pseudo gene   | 5 | GC01M186581 | 1.004889 | <a href="https://www.genecards.org/cgi-bin/carddisp.pl?gene=ENSG00000233196">https://www.genecards.org/cgi-bin/carddisp.pl?gene=ENSG00000233196</a> |
| ENSG00000240399 | Ribosomal Protein L37 (RPL37) Pseudogene                                          | Pseudo gene   | 5 | GC12M048055 | 1.004889 | <a href="https://www.genecards.org/cgi-bin/carddisp.pl?gene=ENSG00000240399">https://www.genecards.org/cgi-bin/carddisp.pl?gene=ENSG00000240399</a> |
| ENSG00000271128 | Chromosome 7 Open Reading Frame 73 (C7orf73) Pseudogene                           | Pseudo gene   | 5 | GC05M134082 | 1.004889 | <a href="https://www.genecards.org/cgi-bin/carddisp.pl?gene=ENSG00000271128">https://www.genecards.org/cgi-bin/carddisp.pl?gene=ENSG00000271128</a> |
| ENSG00000271547 | Chromosome 20 Open Reading Frame 27 (C20orf27) Pseudogene                         | Pseudo gene   | 5 | GC12M049419 | 1.004889 | <a href="https://www.genecards.org/cgi-bin/carddisp.pl?gene=ENSG00000271547">https://www.genecards.org/cgi-bin/carddisp.pl?gene=ENSG00000271547</a> |
| ENSG00000272980 | Novel Transcript                                                                  | RNA Gene      | 5 | GC06P167000 | 1.004889 | <a href="https://www.genecards.org/cgi-bin/carddisp.pl?gene=ENSG00000272980">https://www.genecards.org/cgi-bin/carddisp.pl?gene=ENSG00000272980</a> |
| ENSG00000273112 | Novel Transcript, Readthrough Between FCGR2A And FCGR2C Polymorphic Pseudogene    | RNA Gene      | 5 | GC01P161704 | 1.004889 | <a href="https://www.genecards.org/cgi-bin/carddisp.pl?gene=ENSG00000273112">https://www.genecards.org/cgi-bin/carddisp.pl?gene=ENSG00000273112</a> |
| ENSG00000274425 | Novel Transcript, Antisense To ICAM3                                              | RNA Gene      | 5 | GC19P010333 | 1.004889 | <a href="https://www.genecards.org/cgi-bin/carddisp.pl?gene=ENSG00000274425">https://www.genecards.org/cgi-bin/carddisp.pl?gene=ENSG00000274425</a> |
| ENSG00000280216 | TEC                                                                               | Uncategorized | 5 | GC22P039381 | 1.004889 | <a href="https://www.genecards.org/cgi-bin/carddisp.pl?gene=ENSG00000280216">https://www.genecards.org/cgi-bin/carddisp.pl?gene=ENSG00000280216</a> |
| ENSG00000284914 | Novel Transcript                                                                  | RNA Gene      | 5 | GC06M167126 | 1.004889 | <a href="https://www.genecards.org/cgi-bin/carddisp.pl?gene=ENSG00000284914">https://www.genecards.org/cgi-bin/carddisp.pl?gene=ENSG00000284914</a> |
| ENSG00000285842 | Novel Transcript                                                                  | RNA Gene      | 5 | GC11P095571 | 1.004889 | <a href="https://www.genecards.org/cgi-bin/carddisp.pl?gene=ENSG00000285842">https://www.genecards.org/cgi-bin/carddisp.pl?gene=ENSG00000285842</a> |

|                 |                                      |                |   |             |          |                                                                                                                                                     |
|-----------------|--------------------------------------|----------------|---|-------------|----------|-----------------------------------------------------------------------------------------------------------------------------------------------------|
|                 |                                      |                |   |             |          | <a href="https://www.genecards.org/cgi-bin/carddisp.pl?gene=ENSG00000285842">bin/carddisp.pl?gene=ENSG00000285842</a>                               |
| ENSG00000288064 | Novel Transcript, Antisense To STAT4 | RNA Gene       | 5 | GC02P191045 | 1.004889 | <a href="https://www.genecards.org/cgi-bin/carddisp.pl?gene=ENSG00000288064">https://www.genecards.org/cgi-bin/carddisp.pl?gene=ENSG00000288064</a> |
| ENSG00000288711 | Novel Protein                        | Protein Coding | 5 | GC21M034511 | 1.004889 | <a href="https://www.genecards.org/cgi-bin/carddisp.pl?gene=ENSG00000288711">https://www.genecards.org/cgi-bin/carddisp.pl?gene=ENSG00000288711</a> |
| HSALNG0001400   |                                      | RNA Gene       | 5 | GC01P019765 | 1.004889 | <a href="https://www.genecards.org/cgi-bin/carddisp.pl?gene=HSALNG0001400">https://www.genecards.org/cgi-bin/carddisp.pl?gene=HSALNG0001400</a>     |
| HSALNG0007924   |                                      | RNA Gene       | 5 | GC01M161280 | 1.004889 | <a href="https://www.genecards.org/cgi-bin/carddisp.pl?gene=HSALNG0007924">https://www.genecards.org/cgi-bin/carddisp.pl?gene=HSALNG0007924</a>     |
| HSALNG0008504   |                                      | RNA Gene       | 5 | GC01P173188 | 1.004889 | <a href="https://www.genecards.org/cgi-bin/carddisp.pl?gene=HSALNG0008504">https://www.genecards.org/cgi-bin/carddisp.pl?gene=HSALNG0008504</a>     |
| HSALNG0021150   |                                      | RNA Gene       | 5 | GC02M191076 | 1.004889 | <a href="https://www.genecards.org/cgi-bin/carddisp.pl?gene=HSALNG0021150">https://www.genecards.org/cgi-bin/carddisp.pl?gene=HSALNG0021150</a>     |
| HSALNG0021699   |                                      | RNA Gene       | 5 | GC02P203869 | 1.004889 | <a href="https://www.genecards.org/cgi-bin/carddisp.pl?gene=HSALNG0021699">https://www.genecards.org/cgi-bin/carddisp.pl?gene=HSALNG0021699</a>     |
| HSALNG0024811   |                                      | RNA Gene       | 5 | GC03M027718 | 1.004889 | <a href="https://www.genecards.org/cgi-bin/carddisp.pl?gene=HSALNG0024811">https://www.genecards.org/cgi-bin/carddisp.pl?gene=HSALNG0024811</a>     |
| HSALNG0035396   |                                      | RNA Gene       | 5 | GC04P078693 | 1.004889 | <a href="https://www.genecards.org/cgi-bin/carddisp.pl?gene=HSALNG0035396">https://www.genecards.org/cgi-bin/carddisp.pl?gene=HSALNG0035396</a>     |
| HSALNG0035397   |                                      | RNA Gene       | 5 | GC04M078605 | 1.004889 | <a href="https://www.genecards.org/cgi-bin/carddisp.pl?gene=HSALNG0035397">https://www.genecards.org/cgi-bin/carddisp.pl?gene=HSALNG0035397</a>     |
| HSALNG0036439   |                                      | RNA Gene       | 5 | GC04M112278 | 1.004889 | <a href="https://www.genecards.org/cgi-bin/carddisp.pl?gene=HSALNG0036439">https://www.genecards.org/cgi-bin/carddisp.pl?gene=HSALNG0036439</a>     |
| HSALNG0045887   |                                      | RNA Gene       | 5 | GC05P151057 | 1.004889 | <a href="https://www.genecards.org/cgi-bin/carddisp.pl?gene=HSALNG0045887">https://www.genecards.org/cgi-bin/carddisp.pl?gene=HSALNG0045887</a>     |
| HSALNG0045890   |                                      | RNA Gene       | 5 | GC05P151084 | 1.004889 | <a href="https://www.genecards.org/cgi-bin/carddisp.pl?gene=HSALNG0045890">https://www.genecards.org/cgi-bin/carddisp.pl?gene=HSALNG0045890</a>     |

|                   |          |   |             |          |                                                                                                                                                         |
|-------------------|----------|---|-------------|----------|---------------------------------------------------------------------------------------------------------------------------------------------------------|
| HSALNG0049408     | RNA Gene | 5 | GC06P084605 | 1.004889 | <a href="https://www.genecards.org/cgi-bin/carddisp.pl?gene=HSALNG0049408">https://www.genecards.org/cgi-bin/carddisp.pl?gene=HSALNG0049408</a>         |
| HSALNG0049409     | RNA Gene | 5 | GC06P084606 | 1.004889 | <a href="https://www.genecards.org/cgi-bin/carddisp.pl?gene=HSALNG0049409">https://www.genecards.org/cgi-bin/carddisp.pl?gene=HSALNG0049409</a>         |
| HSALNG0049410     | RNA Gene | 5 | GC06P084607 | 1.004889 | <a href="https://www.genecards.org/cgi-bin/carddisp.pl?gene=HSALNG0049410">https://www.genecards.org/cgi-bin/carddisp.pl?gene=HSALNG0049410</a>         |
| HSALNG0049413     | RNA Gene | 5 | GC06P084608 | 1.004889 | <a href="https://www.genecards.org/cgi-bin/carddisp.pl?gene=HSALNG0049413">https://www.genecards.org/cgi-bin/carddisp.pl?gene=HSALNG0049413</a>         |
| HSALNG0049415     | RNA Gene | 5 | GC06P084609 | 1.004889 | <a href="https://www.genecards.org/cgi-bin/carddisp.pl?gene=HSALNG0049415">https://www.genecards.org/cgi-bin/carddisp.pl?gene=HSALNG0049415</a>         |
| HSALNG0050281     | RNA Gene | 5 | GC06M066833 | 1.004889 | <a href="https://www.genecards.org/cgi-bin/carddisp.pl?gene=HSALNG0050281">https://www.genecards.org/cgi-bin/carddisp.pl?gene=HSALNG0050281</a>         |
| HSALNG0055144     | RNA Gene | 5 | GC06P167112 | 1.004889 | <a href="https://www.genecards.org/cgi-bin/carddisp.pl?gene=HSALNG0055144">https://www.genecards.org/cgi-bin/carddisp.pl?gene=HSALNG0055144</a>         |
| HSALNG0061260     | RNA Gene | 5 | GC07M128933 | 1.004889 | <a href="https://www.genecards.org/cgi-bin/carddisp.pl?gene=HSALNG0061260">https://www.genecards.org/cgi-bin/carddisp.pl?gene=HSALNG0061260</a>         |
| HSALNG0061261     | RNA Gene | 5 | GC07P132005 | 1.004889 | <a href="https://www.genecards.org/cgi-bin/carddisp.pl?gene=HSALNG0061261">https://www.genecards.org/cgi-bin/carddisp.pl?gene=HSALNG0061261</a>         |
| HSALNG0063445     | RNA Gene | 5 | GC08M011494 | 1.004889 | <a href="https://www.genecards.org/cgi-bin/carddisp.pl?gene=HSALNG0063445">https://www.genecards.org/cgi-bin/carddisp.pl?gene=HSALNG0063445</a>         |
| HSALNG0074141     | RNA Gene | 5 | GC09M120870 | 1.004889 | <a href="https://www.genecards.org/cgi-bin/carddisp.pl?gene=HSALNG0074141">https://www.genecards.org/cgi-bin/carddisp.pl?gene=HSALNG0074141</a>         |
| HSALNG0074148-001 | RNA Gene | 5 | GC09M120932 | 1.004889 | <a href="https://www.genecards.org/cgi-bin/carddisp.pl?gene=HSALNG0074148-001">https://www.genecards.org/cgi-bin/carddisp.pl?gene=HSALNG0074148-001</a> |
| HSALNG0074148-002 | RNA Gene | 5 | GC09M120934 | 1.004889 | <a href="https://www.genecards.org/cgi-bin/carddisp.pl?gene=HSALNG0074148-002">https://www.genecards.org/cgi-bin/carddisp.pl?gene=HSALNG0074148-002</a> |

|                   |          |   |             |          |                                                                                                                                                         |
|-------------------|----------|---|-------------|----------|---------------------------------------------------------------------------------------------------------------------------------------------------------|
| HSALNG0075250     | RNA Gene | 5 | GC09M136393 | 1.004889 | <a href="https://www.genecards.org/cgi-bin/carddisp.pl?gene=HSALNG0075250">https://www.genecards.org/cgi-bin/carddisp.pl?gene=HSALNG0075250</a>         |
| HSALNG0076038     | RNA Gene | 5 | GC10P008048 | 1.004889 | <a href="https://www.genecards.org/cgi-bin/carddisp.pl?gene=HSALNG0076038">https://www.genecards.org/cgi-bin/carddisp.pl?gene=HSALNG0076038</a>         |
| HSALNG0076041     | RNA Gene | 5 | GC10M008055 | 1.004889 | <a href="https://www.genecards.org/cgi-bin/carddisp.pl?gene=HSALNG0076041">https://www.genecards.org/cgi-bin/carddisp.pl?gene=HSALNG0076041</a>         |
| HSALNG0079213     | RNA Gene | 5 | GC10M081925 | 1.004889 | <a href="https://www.genecards.org/cgi-bin/carddisp.pl?gene=HSALNG0079213">https://www.genecards.org/cgi-bin/carddisp.pl?gene=HSALNG0079213</a>         |
| HSALNG0084559     | RNA Gene | 5 | GC11P061825 | 1.004889 | <a href="https://www.genecards.org/cgi-bin/carddisp.pl?gene=HSALNG0084559">https://www.genecards.org/cgi-bin/carddisp.pl?gene=HSALNG0084559</a>         |
| HSALNG0084560     | RNA Gene | 5 | GC11M090798 | 1.004889 | <a href="https://www.genecards.org/cgi-bin/carddisp.pl?gene=HSALNG0084560">https://www.genecards.org/cgi-bin/carddisp.pl?gene=HSALNG0084560</a>         |
| HSALNG0084561-001 | RNA Gene | 5 | GC11P061842 | 1.004889 | <a href="https://www.genecards.org/cgi-bin/carddisp.pl?gene=HSALNG0084561-001">https://www.genecards.org/cgi-bin/carddisp.pl?gene=HSALNG0084561-001</a> |
| HSALNG0087578     | RNA Gene | 5 | GC11P118845 | 1.004889 | <a href="https://www.genecards.org/cgi-bin/carddisp.pl?gene=HSALNG0087578">https://www.genecards.org/cgi-bin/carddisp.pl?gene=HSALNG0087578</a>         |
| HSALNG0094037     | RNA Gene | 5 | GC12P111432 | 1.004889 | <a href="https://www.genecards.org/cgi-bin/carddisp.pl?gene=HSALNG0094037">https://www.genecards.org/cgi-bin/carddisp.pl?gene=HSALNG0094037</a>         |
| HSALNG0102522     | RNA Gene | 5 | GC14M075477 | 1.004889 | <a href="https://www.genecards.org/cgi-bin/carddisp.pl?gene=HSALNG0102522">https://www.genecards.org/cgi-bin/carddisp.pl?gene=HSALNG0102522</a>         |
| HSALNG0122747     | RNA Gene | 5 | GC18M079391 | 1.004889 | <a href="https://www.genecards.org/cgi-bin/carddisp.pl?gene=HSALNG0122747">https://www.genecards.org/cgi-bin/carddisp.pl?gene=HSALNG0122747</a>         |
| HSALNG0122748     | RNA Gene | 5 | GC18P079392 | 1.004889 | <a href="https://www.genecards.org/cgi-bin/carddisp.pl?gene=HSALNG0122748">https://www.genecards.org/cgi-bin/carddisp.pl?gene=HSALNG0122748</a>         |
| HSALNG0122749     | RNA Gene | 5 | GC18P079394 | 1.004889 | <a href="https://www.genecards.org/cgi-bin/carddisp.pl?gene=HSALNG0122749">https://www.genecards.org/cgi-bin/carddisp.pl?gene=HSALNG0122749</a>         |

|               |                                                  |                |   |             |          |                                                                                                                                                 |
|---------------|--------------------------------------------------|----------------|---|-------------|----------|-------------------------------------------------------------------------------------------------------------------------------------------------|
| HSALNG0132765 |                                                  | RNA Gene       | 5 | GC21M033400 | 1.004889 | <a href="https://www.genecards.org/cgi-bin/carddisp.pl?gene=HSALNG0132765">https://www.genecards.org/cgi-bin/carddisp.pl?gene=HSALNG0132765</a> |
| HSALNG0135279 |                                                  | RNA Gene       | 5 | GC22M037128 | 1.004889 | <a href="https://www.genecards.org/cgi-bin/carddisp.pl?gene=HSALNG0135279">https://www.genecards.org/cgi-bin/carddisp.pl?gene=HSALNG0135279</a> |
| HSALNG0135499 |                                                  | RNA Gene       | 5 | GC22P039433 | 1.004889 | <a href="https://www.genecards.org/cgi-bin/carddisp.pl?gene=HSALNG0135499">https://www.genecards.org/cgi-bin/carddisp.pl?gene=HSALNG0135499</a> |
| LOC124901069  | Short Transmembrane Mitochondrial Protein 1-Like | Protein Coding | 5 | GC05M134083 | 1.004889 | <a href="https://www.genecards.org/cgi-bin/carddisp.pl?gene=LOC124901069">https://www.genecards.org/cgi-bin/carddisp.pl?gene=LOC124901069</a>   |
| LOC124902436  | Talanin                                          | Protein Coding | 5 | GC10P062643 | 1.004889 | <a href="https://www.genecards.org/cgi-bin/carddisp.pl?gene=LOC124902436">https://www.genecards.org/cgi-bin/carddisp.pl?gene=LOC124902436</a>   |
| LOC124902802  | Protein GVQW1-Like                               | Protein Coding | 5 | GC11P009817 | 1.004889 | <a href="https://www.genecards.org/cgi-bin/carddisp.pl?gene=LOC124902802">https://www.genecards.org/cgi-bin/carddisp.pl?gene=LOC124902802</a>   |
| LOC124903162  | Uncharacterized LOC124903162                     | Protein Coding | 5 | GC13M040107 | 1.004889 | <a href="https://www.genecards.org/cgi-bin/carddisp.pl?gene=LOC124903162">https://www.genecards.org/cgi-bin/carddisp.pl?gene=LOC124903162</a>   |
| LOC124904063  | Uncharacterized LOC124904063                     | Protein Coding | 5 | GC17P078327 | 1.004889 | <a href="https://www.genecards.org/cgi-bin/carddisp.pl?gene=LOC124904063">https://www.genecards.org/cgi-bin/carddisp.pl?gene=LOC124904063</a>   |
| LOC124909485  | Uncharacterized LOC124909485                     | Protein Coding | 5 | GC03P058172 | 1.004889 | <a href="https://www.genecards.org/cgi-bin/carddisp.pl?gene=LOC124909485">https://www.genecards.org/cgi-bin/carddisp.pl?gene=LOC124909485</a>   |
| LOC645481     | Zinc Finger Protein 248 Pseudogene               | Pseudo gene    | 5 | GC04P026127 | 1.004889 | <a href="https://www.genecards.org/cgi-bin/carddisp.pl?gene=LOC645481">https://www.genecards.org/cgi-bin/carddisp.pl?gene=LOC645481</a>         |
| MK280073-024  |                                                  | RNA Gene       | 5 | GC01P173325 | 1.004889 | <a href="https://www.genecards.org/cgi-bin/carddisp.pl?gene=MK280073-024">https://www.genecards.org/cgi-bin/carddisp.pl?gene=MK280073-024</a>   |
| MK280144-573  |                                                  | RNA Gene       | 5 | GC06M067897 | 1.004889 | <a href="https://www.genecards.org/cgi-bin/carddisp.pl?gene=MK280144-573">https://www.genecards.org/cgi-bin/carddisp.pl?gene=MK280144-573</a>   |
| MK280269-008  |                                                  | RNA Gene       | 5 | GC10M070214 | 1.004889 | <a href="https://www.genecards.org/cgi-bin/carddisp.pl?gene=MK280269-008">https://www.genecards.org/cgi-bin/carddisp.pl?gene=MK280269-008</a>   |
| MN297545      |                                                  | RNA Gene       | 5 | GC18M079398 | 1.004889 | <a href="https://www.genecards.org/cgi-bin/carddisp.pl?gene=MN297545">https://www.genecards.org/cgi-bin/carddisp.pl?gene=MN297545</a>           |

|                     |                                                        |             |   |             |          |                                                                                                                                                             |
|---------------------|--------------------------------------------------------|-------------|---|-------------|----------|-------------------------------------------------------------------------------------------------------------------------------------------------------------|
|                     |                                                        |             |   |             |          | bin/carddisp.pl?gene=MN297545                                                                                                                               |
| MN298114-116        |                                                        | RNA Gene    | 5 | GC21P034282 | 1.004889 | <a href="https://www.genecards.org/cgi-bin/carddisp.pl?gene=MN298114-116">https://www.genecards.org/cgi-bin/carddisp.pl?gene=MN298114-116</a>               |
| MN309174-057        |                                                        | RNA Gene    | 5 | GC10P092764 | 1.004889 | <a href="https://www.genecards.org/cgi-bin/carddisp.pl?gene=MN309174-057">https://www.genecards.org/cgi-bin/carddisp.pl?gene=MN309174-057</a>               |
| NDUFB9 P2           | NADH:Ubiquinone Oxidoreductase Subunit B9 Pseudogene 2 | Pseudo gene | 5 | GC07M131754 | 1.004889 | <a href="https://www.genecards.org/cgi-bin/carddisp.pl?gene=NDUFB9P2">https://www.genecards.org/cgi-bin/carddisp.pl?gene=NDUFB9P2</a>                       |
| NONHSAG001750.2     |                                                        | RNA Gene    | 5 | GC01P067182 | 1.004889 | <a href="https://www.genecards.org/cgi-bin/carddisp.pl?gene=NONHSAG001750.2">https://www.genecards.org/cgi-bin/carddisp.pl?gene=NONHSAG001750.2</a>         |
| NONHSAG001753.2     |                                                        | RNA Gene    | 5 | GC01P067308 | 1.004889 | <a href="https://www.genecards.org/cgi-bin/carddisp.pl?gene=NONHSAG001753.2">https://www.genecards.org/cgi-bin/carddisp.pl?gene=NONHSAG001753.2</a>         |
| NONHSAG005179.2-001 |                                                        | RNA Gene    | 5 | GC10P008054 | 1.004889 | <a href="https://www.genecards.org/cgi-bin/carddisp.pl?gene=NONHSAG005179.2-001">https://www.genecards.org/cgi-bin/carddisp.pl?gene=NONHSAG005179.2-001</a> |
| NONHSAG005179.2-002 |                                                        | RNA Gene    | 5 | GC10P008064 | 1.004889 | <a href="https://www.genecards.org/cgi-bin/carddisp.pl?gene=NONHSAG005179.2-002">https://www.genecards.org/cgi-bin/carddisp.pl?gene=NONHSAG005179.2-002</a> |
| NONHSAG031883.2-001 |                                                        | RNA Gene    | 5 | GC20P046119 | 1.004889 | <a href="https://www.genecards.org/cgi-bin/carddisp.pl?gene=NONHSAG031883.2-001">https://www.genecards.org/cgi-bin/carddisp.pl?gene=NONHSAG031883.2-001</a> |
| NONHSAG043563.2     |                                                        | RNA Gene    | 5 | GC06P085607 | 1.004889 | <a href="https://www.genecards.org/cgi-bin/carddisp.pl?gene=NONHSAG043563.2">https://www.genecards.org/cgi-bin/carddisp.pl?gene=NONHSAG043563.2</a>         |
| NONHSAG044958.2     |                                                        | RNA Gene    | 5 | GC06P137874 | 1.004889 | <a href="https://www.genecards.org/cgi-bin/carddisp.pl?gene=NONHSAG044958.2">https://www.genecards.org/cgi-bin/carddisp.pl?gene=NONHSAG044958.2</a>         |
| RF00017-1167        |                                                        | RNA Gene    | 5 | GC12M111251 | 1.004889 | <a href="https://www.genecards.org/cgi-bin/carddisp.pl?gene=RF00017-1167">https://www.genecards.org/cgi-bin/carddisp.pl?gene=RF00017-1167</a>               |
| RF00017-4245        |                                                        | RNA Gene    | 5 | GC05M054016 | 1.004889 | <a href="https://www.genecards.org/cgi-bin/carddisp.pl?gene=RF00017-4245">https://www.genecards.org/cgi-bin/carddisp.pl?gene=RF00017-4245</a>               |

|                |  |          |   |             |          |                                                                                                                                                   |
|----------------|--|----------|---|-------------|----------|---------------------------------------------------------------------------------------------------------------------------------------------------|
| RF00017-4626   |  | RNA Gene | 5 | GC05P150704 | 1.004889 | <a href="https://www.genecards.org/cgi-bin/carddisp.pl?gene=RF00017-4626">https://www.genecards.org/cgi-bin/carddisp.pl?gene=RF00017-4626</a>     |
| RF00017-5297   |  | RNA Gene | 5 | GC06M105987 | 1.004889 | <a href="https://www.genecards.org/cgi-bin/carddisp.pl?gene=RF00017-5297">https://www.genecards.org/cgi-bin/carddisp.pl?gene=RF00017-5297</a>     |
| RF00017-6101   |  | RNA Gene | 5 | GC07P101334 | 1.004889 | <a href="https://www.genecards.org/cgi-bin/carddisp.pl?gene=RF00017-6101">https://www.genecards.org/cgi-bin/carddisp.pl?gene=RF00017-6101</a>     |
| RF00017-649    |  | RNA Gene | 5 | GC10P093424 | 1.004889 | <a href="https://www.genecards.org/cgi-bin/carddisp.pl?gene=RF00017-649">https://www.genecards.org/cgi-bin/carddisp.pl?gene=RF00017-649</a>       |
| RF00019-050    |  | RNA Gene | 5 | GC15P042442 | 1.004889 | <a href="https://www.genecards.org/cgi-bin/carddisp.pl?gene=RF00019-050">https://www.genecards.org/cgi-bin/carddisp.pl?gene=RF00019-050</a>       |
| RF00026-588    |  | RNA Gene | 5 | GC02P191125 | 1.004889 | <a href="https://www.genecards.org/cgi-bin/carddisp.pl?gene=RF00026-588">https://www.genecards.org/cgi-bin/carddisp.pl?gene=RF00026-588</a>       |
| RF00026-650    |  | RNA Gene | 5 | GC21M042431 | 1.004889 | <a href="https://www.genecards.org/cgi-bin/carddisp.pl?gene=RF00026-650">https://www.genecards.org/cgi-bin/carddisp.pl?gene=RF00026-650</a>       |
| lnc-ADD2-2     |  | RNA Gene | 5 | GC02M070456 | 1.004889 | <a href="https://www.genecards.org/cgi-bin/carddisp.pl?gene=lnc-ADD2-2">https://www.genecards.org/cgi-bin/carddisp.pl?gene=lnc-ADD2-2</a>         |
| lnc-ANKRD33B-6 |  | RNA Gene | 5 | GC05P010698 | 1.004889 | <a href="https://www.genecards.org/cgi-bin/carddisp.pl?gene=lnc-ANKRD33B-6">https://www.genecards.org/cgi-bin/carddisp.pl?gene=lnc-ANKRD33B-6</a> |
| lnc-ANKRD33B-7 |  | RNA Gene | 5 | GC05P010708 | 1.004889 | <a href="https://www.genecards.org/cgi-bin/carddisp.pl?gene=lnc-ANKRD33B-7">https://www.genecards.org/cgi-bin/carddisp.pl?gene=lnc-ANKRD33B-7</a> |
| lnc-ASAP1-6    |  | RNA Gene | 5 | GC08M129855 | 1.004889 | <a href="https://www.genecards.org/cgi-bin/carddisp.pl?gene=lnc-ASAP1-6">https://www.genecards.org/cgi-bin/carddisp.pl?gene=lnc-ASAP1-6</a>       |
| lnc-BAD-1      |  | RNA Gene | 5 | GC11M064276 | 1.004889 | <a href="https://www.genecards.org/cgi-bin/carddisp.pl?gene=lnc-BAD-1">https://www.genecards.org/cgi-bin/carddisp.pl?gene=lnc-BAD-1</a>           |
| lnc-C5-1       |  | RNA Gene | 5 | GC09M120924 | 1.004889 | <a href="https://www.genecards.org/cgi-bin/carddisp.pl?gene=lnc-C5-1">https://www.genecards.org/cgi-bin/carddisp.pl?gene=lnc-C5-1</a>             |
| lnc-CASTOR1-1  |  | RNA Gene | 5 | GC22M057165 | 1.004889 | <a href="https://www.genecards.org/cgi-bin/carddisp.pl?gene=lnc-CASTOR1-1">https://www.genecards.org/cgi-bin/carddisp.pl?gene=lnc-CASTOR1-1</a>   |



|               |          |   |             |          |                                                                                                                                                 |
|---------------|----------|---|-------------|----------|-------------------------------------------------------------------------------------------------------------------------------------------------|
|               |          |   |             |          | <a href="#">bin/carddisp.pl?gene=1nc-CASTOR1-1</a>                                                                                              |
| lnc-CD83-11   | RNA Gene | 5 | GC06P014094 | 1.004889 | <a href="https://www.genecards.org/cgi-bin/carddisp.pl?gene=1nc-CD83-11">https://www.genecards.org/cgi-bin/carddisp.pl?gene=1nc-CD83-11</a>     |
| lnc-CD83-7    | RNA Gene | 5 | GC06P014100 | 1.004889 | <a href="https://www.genecards.org/cgi-bin/carddisp.pl?gene=1nc-CD83-7">https://www.genecards.org/cgi-bin/carddisp.pl?gene=1nc-CD83-7</a>       |
| lnc-CEP76-3   | RNA Gene | 5 | GC18M024982 | 1.004889 | <a href="https://www.genecards.org/cgi-bin/carddisp.pl?gene=1nc-CEP76-3">https://www.genecards.org/cgi-bin/carddisp.pl?gene=1nc-CEP76-3</a>     |
| lnc-CHP2-1    | RNA Gene | 5 | GC16P023875 | 1.004889 | <a href="https://www.genecards.org/cgi-bin/carddisp.pl?gene=1nc-CHP2-1">https://www.genecards.org/cgi-bin/carddisp.pl?gene=1nc-CHP2-1</a>       |
| lnc-CREB5-4   | RNA Gene | 5 | GC07P028146 | 1.004889 | <a href="https://www.genecards.org/cgi-bin/carddisp.pl?gene=1nc-CREB5-4">https://www.genecards.org/cgi-bin/carddisp.pl?gene=1nc-CREB5-4</a>     |
| lnc-CTNND2-10 | RNA Gene | 5 | GC05M010743 | 1.004889 | <a href="https://www.genecards.org/cgi-bin/carddisp.pl?gene=1nc-CTNND2-10">https://www.genecards.org/cgi-bin/carddisp.pl?gene=1nc-CTNND2-10</a> |
| lnc-CTNND2-6  | RNA Gene | 5 | GC05M010707 | 1.004889 | <a href="https://www.genecards.org/cgi-bin/carddisp.pl?gene=1nc-CTNND2-6">https://www.genecards.org/cgi-bin/carddisp.pl?gene=1nc-CTNND2-6</a>   |
| lnc-CYP1B1-7  | RNA Gene | 5 | GC02M037679 | 1.004889 | <a href="https://www.genecards.org/cgi-bin/carddisp.pl?gene=1nc-CYP1B1-7">https://www.genecards.org/cgi-bin/carddisp.pl?gene=1nc-CYP1B1-7</a>   |
| lnc-DYDC1-12  | RNA Gene | 5 | GC10M080453 | 1.004889 | <a href="https://www.genecards.org/cgi-bin/carddisp.pl?gene=1nc-DYDC1-12">https://www.genecards.org/cgi-bin/carddisp.pl?gene=1nc-DYDC1-12</a>   |
| lnc-ECHDC3-8  | RNA Gene | 5 | GC10P011253 | 1.004889 | <a href="https://www.genecards.org/cgi-bin/carddisp.pl?gene=1nc-ECHDC3-8">https://www.genecards.org/cgi-bin/carddisp.pl?gene=1nc-ECHDC3-8</a>   |
| lnc-FAM109A-1 | RNA Gene | 5 | GC12M111536 | 1.004889 | <a href="https://www.genecards.org/cgi-bin/carddisp.pl?gene=1nc-FAM109A-1">https://www.genecards.org/cgi-bin/carddisp.pl?gene=1nc-FAM109A-1</a> |
| lnc-FAM109A-2 | RNA Gene | 5 | GC12M111405 | 1.004889 | <a href="https://www.genecards.org/cgi-bin/carddisp.pl?gene=1nc-FAM109A-2">https://www.genecards.org/cgi-bin/carddisp.pl?gene=1nc-FAM109A-2</a> |
| lnc-FAM133B-2 | RNA Gene | 5 | GC07M092611 | 1.004889 | <a href="https://www.genecards.org/cgi-bin/carddisp.pl?gene=1nc-FAM133B-2">https://www.genecards.org/cgi-bin/carddisp.pl?gene=1nc-FAM133B-2</a> |

|                    |          |   |             |          |                                                                                                                                                           |
|--------------------|----------|---|-------------|----------|-----------------------------------------------------------------------------------------------------------------------------------------------------------|
| lnc-FNDC1-8        | RNA Gene | 5 | GC06P160581 | 1.004889 | <a href="https://www.genecards.org/cgi-bin/carddisp.pl?gene=lnc-FNDC1-8">https://www.genecards.org/cgi-bin/carddisp.pl?gene=lnc-FNDC1-8</a>               |
| lnc-GATA3-19-001   | RNA Gene | 5 | GC10P008992 | 1.004889 | <a href="https://www.genecards.org/cgi-bin/carddisp.pl?gene=lnc-GATA3-19-001">https://www.genecards.org/cgi-bin/carddisp.pl?gene=lnc-GATA3-19-001</a>     |
| lnc-GATA3-20       | RNA Gene | 5 | GC10P009028 | 1.004889 | <a href="https://www.genecards.org/cgi-bin/carddisp.pl?gene=lnc-GATA3-20">https://www.genecards.org/cgi-bin/carddisp.pl?gene=lnc-GATA3-20</a>             |
| lnc-GIN1-2         | RNA Gene | 5 | GC05M103281 | 1.004889 | <a href="https://www.genecards.org/cgi-bin/carddisp.pl?gene=lnc-GIN1-2">https://www.genecards.org/cgi-bin/carddisp.pl?gene=lnc-GIN1-2</a>                 |
| lnc-HLA-DQA1-10    | RNA Gene | 5 | GC06P085069 | 1.004889 | <a href="https://www.genecards.org/cgi-bin/carddisp.pl?gene=lnc-HLA-DQA1-10">https://www.genecards.org/cgi-bin/carddisp.pl?gene=lnc-HLA-DQA1-10</a>       |
| lnc-HLA-DQA1-9     | RNA Gene | 5 | GC06P085071 | 1.004889 | <a href="https://www.genecards.org/cgi-bin/carddisp.pl?gene=lnc-HLA-DQA1-9">https://www.genecards.org/cgi-bin/carddisp.pl?gene=lnc-HLA-DQA1-9</a>         |
| lnc-HLA-DRB1-7     | RNA Gene | 5 | GC06M032609 | 1.004889 | <a href="https://www.genecards.org/cgi-bin/carddisp.pl?gene=lnc-HLA-DRB1-7">https://www.genecards.org/cgi-bin/carddisp.pl?gene=lnc-HLA-DRB1-7</a>         |
| lnc-HLA-DRB5-1-002 | RNA Gene | 5 | GC06M032459 | 1.004889 | <a href="https://www.genecards.org/cgi-bin/carddisp.pl?gene=lnc-HLA-DRB5-1-002">https://www.genecards.org/cgi-bin/carddisp.pl?gene=lnc-HLA-DRB5-1-002</a> |
| lnc-IGSF3-3        | RNA Gene | 5 | GC01M116740 | 1.004889 | <a href="https://www.genecards.org/cgi-bin/carddisp.pl?gene=lnc-IGSF3-3">https://www.genecards.org/cgi-bin/carddisp.pl?gene=lnc-IGSF3-3</a>               |
| lnc-IL2RA-4        | RNA Gene | 5 | GC10M006071 | 1.004889 | <a href="https://www.genecards.org/cgi-bin/carddisp.pl?gene=lnc-IL2RA-4">https://www.genecards.org/cgi-bin/carddisp.pl?gene=lnc-IL2RA-4</a>               |
| lnc-IL2RB-1        | RNA Gene | 5 | GC22M037139 | 1.004889 | <a href="https://www.genecards.org/cgi-bin/carddisp.pl?gene=lnc-IL2RB-1">https://www.genecards.org/cgi-bin/carddisp.pl?gene=lnc-IL2RB-1</a>               |
| lnc-IRF5-3         | RNA Gene | 5 | GC07P132040 | 1.004889 | <a href="https://www.genecards.org/cgi-bin/carddisp.pl?gene=lnc-IRF5-3">https://www.genecards.org/cgi-bin/carddisp.pl?gene=lnc-IRF5-3</a>                 |
| lnc-KIN-10         | RNA Gene | 5 | GC10M008992 | 1.004889 | <a href="https://www.genecards.org/cgi-bin/carddisp.pl?gene=lnc-KIN-10">https://www.genecards.org/cgi-bin/carddisp.pl?gene=lnc-KIN-10</a>                 |
| lnc-MCUR1-13       | RNA Gene | 5 | GC06M014092 | 1.004889 | <a href="https://www.genecards.org/cgi-bin/carddisp.pl?gene=lnc-MCUR1-13">https://www.genecards.org/cgi-bin/carddisp.pl?gene=lnc-MCUR1-13</a>             |

|               |          |   |             |          |                                                                                                                                                 |
|---------------|----------|---|-------------|----------|-------------------------------------------------------------------------------------------------------------------------------------------------|
|               |          |   |             |          | <a href="#">bin/carddisp.pl?gene=1nc-MCUR1-13</a>                                                                                               |
| lnc-OLIG3-1   | RNA Gene | 5 | GC06M137671 | 1.004889 | <a href="https://www.genecards.org/cgi-bin/carddisp.pl?gene=1nc-OLIG3-1">https://www.genecards.org/cgi-bin/carddisp.pl?gene=1nc-OLIG3-1</a>     |
| lnc-PFKFB3-3  | RNA Gene | 5 | GC10P006343 | 1.004889 | <a href="https://www.genecards.org/cgi-bin/carddisp.pl?gene=1nc-PFKFB3-3">https://www.genecards.org/cgi-bin/carddisp.pl?gene=1nc-PFKFB3-3</a>   |
| lnc-PLA2G1B-1 | RNA Gene | 5 | GC12M120353 | 1.004889 | <a href="https://www.genecards.org/cgi-bin/carddisp.pl?gene=1nc-PLA2G1B-1">https://www.genecards.org/cgi-bin/carddisp.pl?gene=1nc-PLA2G1B-1</a> |
| lnc-PQLC1-16  | RNA Gene | 5 | GC18M079397 | 1.004889 | <a href="https://www.genecards.org/cgi-bin/carddisp.pl?gene=1nc-PQLC1-16">https://www.genecards.org/cgi-bin/carddisp.pl?gene=1nc-PQLC1-16</a>   |
| lnc-PTPRC-10  | RNA Gene | 5 | GC01P199165 | 1.004889 | <a href="https://www.genecards.org/cgi-bin/carddisp.pl?gene=1nc-PTPRC-10">https://www.genecards.org/cgi-bin/carddisp.pl?gene=1nc-PTPRC-10</a>   |
| lnc-PTTG1-5   | RNA Gene | 5 | GC05P160447 | 1.004889 | <a href="https://www.genecards.org/cgi-bin/carddisp.pl?gene=1nc-PTTG1-5">https://www.genecards.org/cgi-bin/carddisp.pl?gene=1nc-PTTG1-5</a>     |
| lnc-PUS10-2   | RNA Gene | 5 | GC02M060834 | 1.004889 | <a href="https://www.genecards.org/cgi-bin/carddisp.pl?gene=1nc-PUS10-2">https://www.genecards.org/cgi-bin/carddisp.pl?gene=1nc-PUS10-2</a>     |
| lnc-RAB1A-13  | RNA Gene | 5 | GC02M065341 | 1.004889 | <a href="https://www.genecards.org/cgi-bin/carddisp.pl?gene=1nc-RAB1A-13">https://www.genecards.org/cgi-bin/carddisp.pl?gene=1nc-RAB1A-13</a>   |
| lnc-RPLP1-6   | RNA Gene | 5 | GC15P117550 | 1.004889 | <a href="https://www.genecards.org/cgi-bin/carddisp.pl?gene=1nc-RPLP1-6">https://www.genecards.org/cgi-bin/carddisp.pl?gene=1nc-RPLP1-6</a>     |
| lnc-RTKN2-5   | RNA Gene | 5 | GC10M062022 | 1.004889 | <a href="https://www.genecards.org/cgi-bin/carddisp.pl?gene=1nc-RTKN2-5">https://www.genecards.org/cgi-bin/carddisp.pl?gene=1nc-RTKN2-5</a>     |
| lnc-RTTN-6    | RNA Gene | 5 | GC18M069930 | 1.004889 | <a href="https://www.genecards.org/cgi-bin/carddisp.pl?gene=1nc-RTTN-6">https://www.genecards.org/cgi-bin/carddisp.pl?gene=1nc-RTTN-6</a>       |
| lnc-SLC35G5-2 | RNA Gene | 5 | GC08P011494 | 1.004889 | <a href="https://www.genecards.org/cgi-bin/carddisp.pl?gene=1nc-SLC35G5-2">https://www.genecards.org/cgi-bin/carddisp.pl?gene=1nc-SLC35G5-2</a> |
| lnc-SNN-1     | RNA Gene | 5 | GC16P012273 | 1.004889 | <a href="https://www.genecards.org/cgi-bin/carddisp.pl?gene=1nc-SNN-1">https://www.genecards.org/cgi-bin/carddisp.pl?gene=1nc-SNN-1</a>         |

|                |          |   |             |          |                                                                                                                                                   |
|----------------|----------|---|-------------|----------|---------------------------------------------------------------------------------------------------------------------------------------------------|
| lnc-SWAP70-4   | RNA Gene | 5 | GC11P009764 | 1.004889 | <a href="https://www.genecards.org/cgi-bin/carddisp.pl?gene=lnc-SWAP70-4">https://www.genecards.org/cgi-bin/carddisp.pl?gene=lnc-SWAP70-4</a>     |
| lnc-TLE3-16    | RNA Gene | 5 | GC15M069721 | 1.004889 | <a href="https://www.genecards.org/cgi-bin/carddisp.pl?gene=lnc-TLE3-16">https://www.genecards.org/cgi-bin/carddisp.pl?gene=lnc-TLE3-16</a>       |
| lnc-TMEM187-3  | RNA Gene | 5 | GC0XP154020 | 1.004889 | <a href="https://www.genecards.org/cgi-bin/carddisp.pl?gene=lnc-TMEM187-3">https://www.genecards.org/cgi-bin/carddisp.pl?gene=lnc-TMEM187-3</a>   |
| lnc-TNFRSF14-1 | RNA Gene | 5 | GC01P003932 | 1.004889 | <a href="https://www.genecards.org/cgi-bin/carddisp.pl?gene=lnc-TNFRSF14-1">https://www.genecards.org/cgi-bin/carddisp.pl?gene=lnc-TNFRSF14-1</a> |
| lnc-TRPC3-4    | RNA Gene | 5 | GC04M122150 | 1.004889 | <a href="https://www.genecards.org/cgi-bin/carddisp.pl?gene=lnc-TRPC3-4">https://www.genecards.org/cgi-bin/carddisp.pl?gene=lnc-TRPC3-4</a>       |
| lnc-VWCE-2     | RNA Gene | 5 | GC11M061138 | 1.004889 | <a href="https://www.genecards.org/cgi-bin/carddisp.pl?gene=lnc-VWCE-2">https://www.genecards.org/cgi-bin/carddisp.pl?gene=lnc-VWCE-2</a>         |
| lnc-WDHD1-3    | RNA Gene | 5 | GC14M054843 | 1.004889 | <a href="https://www.genecards.org/cgi-bin/carddisp.pl?gene=lnc-WDHD1-3">https://www.genecards.org/cgi-bin/carddisp.pl?gene=lnc-WDHD1-3</a>       |
| lnc-YDJC-2     | RNA Gene | 5 | GC22M021640 | 1.004889 | <a href="https://www.genecards.org/cgi-bin/carddisp.pl?gene=lnc-YDJC-2">https://www.genecards.org/cgi-bin/carddisp.pl?gene=lnc-YDJC-2</a>         |
| lnc-ZEB1-2     | RNA Gene | 5 | GC10P031133 | 1.004889 | <a href="https://www.genecards.org/cgi-bin/carddisp.pl?gene=lnc-ZEB1-2">https://www.genecards.org/cgi-bin/carddisp.pl?gene=lnc-ZEB1-2</a>         |
| lnc-ZFC3H1-13  | RNA Gene | 5 | GC12M072432 | 1.004889 | <a href="https://www.genecards.org/cgi-bin/carddisp.pl?gene=lnc-ZFC3H1-13">https://www.genecards.org/cgi-bin/carddisp.pl?gene=lnc-ZFC3H1-13</a>   |
| piR-32940      | RNA Gene | 5 | GC11P061829 | 1.004889 | <a href="https://www.genecards.org/cgi-bin/carddisp.pl?gene=piR-32940">https://www.genecards.org/cgi-bin/carddisp.pl?gene=piR-32940</a>           |
| piR-36182-002  | RNA Gene | 5 | GC01P160440 | 1.004889 | <a href="https://www.genecards.org/cgi-bin/carddisp.pl?gene=piR-36182-002">https://www.genecards.org/cgi-bin/carddisp.pl?gene=piR-36182-002</a>   |
| piR-43107-023  | RNA Gene | 5 | GC01M167452 | 1.004889 | <a href="https://www.genecards.org/cgi-bin/carddisp.pl?gene=piR-43107-023">https://www.genecards.org/cgi-bin/carddisp.pl?gene=piR-43107-023</a>   |
| piR-44098      | RNA Gene | 5 | GC11M009755 | 1.004889 | <a href="https://www.genecards.org/cgi-bin/carddisp.pl?gene=piR-44098">https://www.genecards.org/cgi-bin/carddisp.pl?gene=piR-44098</a>           |

|                   |                                                                        |               |   |             |          |                                                                      |
|-------------------|------------------------------------------------------------------------|---------------|---|-------------|----------|----------------------------------------------------------------------|
|                   |                                                                        |               |   |             |          | bin/carddisp.pl?gene=piR-44098                                       |
| piR-52079-162     |                                                                        | RNA Gene      | 5 | GC04M112286 | 1.004889 | https://www.genecards.org/cgi-bin/carddisp.pl?gene=piR-52079-162     |
| piR-56037-112     |                                                                        | RNA Gene      | 5 | GC09P120932 | 1.004889 | https://www.genecards.org/cgi-bin/carddisp.pl?gene=piR-56037-112     |
| ENSG00000220412   | Protein Tyrosine Phosphatase, Non-Receptor Type 11 (PTPN11) Pseudogene | Pseudo gene   | 4 | GC06M137706 | 1.004889 | https://www.genecards.org/cgi-bin/carddisp.pl?gene=ENSG00000220412   |
| ENSG00000254478   | Cytochrome C Oxidase Subunit VIIc (COX7C) Pseudogene                   | Pseudo gene   | 4 | GC11P118821 | 1.004889 | https://www.genecards.org/cgi-bin/carddisp.pl?gene=ENSG00000254478   |
| ENSG00000259970   | Novel Transcript                                                       | RNA Gene      | 4 | GC03M049684 | 1.004889 | https://www.genecards.org/cgi-bin/carddisp.pl?gene=ENSG00000259970   |
| ENSG00000260678   | Zinc Finger Protein (ZNF) Pseudogene                                   | Pseudo gene   | 4 | GC16M037188 | 1.004889 | https://www.genecards.org/cgi-bin/carddisp.pl?gene=ENSG00000260678   |
| ENSG00000275106   | Novel Transcript                                                       | Uncategorized | 4 | GC07M128952 | 1.004889 | https://www.genecards.org/cgi-bin/carddisp.pl?gene=ENSG00000275106   |
| ENSG00000279549   | Novel Transcript                                                       | Uncategorized | 4 | GC11M061143 | 1.004889 | https://www.genecards.org/cgi-bin/carddisp.pl?gene=ENSG00000279549   |
| ENSG00000288975   | Novel Transcript                                                       | RNA Gene      | 4 | GC11P128628 | 1.004889 | https://www.genecards.org/cgi-bin/carddisp.pl?gene=ENSG00000288975   |
| HSALNG0001255     |                                                                        | RNA Gene      | 4 | GC01P017846 | 1.004889 | https://www.genecards.org/cgi-bin/carddisp.pl?gene=HSALNG0001255     |
| HSALNG0001405     |                                                                        | RNA Gene      | 4 | GC01P019861 | 1.004889 | https://www.genecards.org/cgi-bin/carddisp.pl?gene=HSALNG0001405     |
| HSALNG0007948-001 |                                                                        | RNA Gene      | 4 | GC01P161702 | 1.004889 | https://www.genecards.org/cgi-bin/carddisp.pl?gene=HSALNG0007948-001 |
| HSALNG0007948-002 |                                                                        | RNA Gene      | 4 | GC01P161703 | 1.004889 | https://www.genecards.org/cgi-bin/carddisp.pl?gene=                  |

|               |          |   |              |           |                                                                                                                                                 |
|---------------|----------|---|--------------|-----------|-------------------------------------------------------------------------------------------------------------------------------------------------|
|               |          |   |              |           | HSALNG0007948-002                                                                                                                               |
| HSALNG0009100 | RNA Gene | 4 | GC01P 186657 | 1.004 889 | <a href="https://www.genecards.org/cgi-bin/carddisp.pl?gene=HSALNG0009100">https://www.genecards.org/cgi-bin/carddisp.pl?gene=HSALNG0009100</a> |
| HSALNG0009535 | RNA Gene | 4 | GC01P 199237 | 1.004 889 | <a href="https://www.genecards.org/cgi-bin/carddisp.pl?gene=HSALNG0009535">https://www.genecards.org/cgi-bin/carddisp.pl?gene=HSALNG0009535</a> |
| HSALNG0009536 | RNA Gene | 4 | GC01M 199344 | 1.004 889 | <a href="https://www.genecards.org/cgi-bin/carddisp.pl?gene=HSALNG0009536">https://www.genecards.org/cgi-bin/carddisp.pl?gene=HSALNG0009536</a> |
| HSALNG0009608 | RNA Gene | 4 | GC01P 200902 | 1.004 889 | <a href="https://www.genecards.org/cgi-bin/carddisp.pl?gene=HSALNG0009608">https://www.genecards.org/cgi-bin/carddisp.pl?gene=HSALNG0009608</a> |
| HSALNG0009609 | RNA Gene | 4 | GC01P 200908 | 1.004 889 | <a href="https://www.genecards.org/cgi-bin/carddisp.pl?gene=HSALNG0009609">https://www.genecards.org/cgi-bin/carddisp.pl?gene=HSALNG0009609</a> |
| HSALNG0013961 | RNA Gene | 4 | GC02P 030217 | 1.004 889 | <a href="https://www.genecards.org/cgi-bin/carddisp.pl?gene=HSALNG0013961">https://www.genecards.org/cgi-bin/carddisp.pl?gene=HSALNG0013961</a> |
| HSALNG0013962 | RNA Gene | 4 | GC02P 030226 | 1.004 889 | <a href="https://www.genecards.org/cgi-bin/carddisp.pl?gene=HSALNG0013962">https://www.genecards.org/cgi-bin/carddisp.pl?gene=HSALNG0013962</a> |
| HSALNG0015539 | RNA Gene | 4 | GC02M 065344 | 1.004 889 | <a href="https://www.genecards.org/cgi-bin/carddisp.pl?gene=HSALNG0015539">https://www.genecards.org/cgi-bin/carddisp.pl?gene=HSALNG0015539</a> |
| HSALNG0016005 | RNA Gene | 4 | GC02M 073986 | 1.004 889 | <a href="https://www.genecards.org/cgi-bin/carddisp.pl?gene=HSALNG0016005">https://www.genecards.org/cgi-bin/carddisp.pl?gene=HSALNG0016005</a> |
| HSALNG0021147 | RNA Gene | 4 | GC02P 191035 | 1.004 889 | <a href="https://www.genecards.org/cgi-bin/carddisp.pl?gene=HSALNG0021147">https://www.genecards.org/cgi-bin/carddisp.pl?gene=HSALNG0021147</a> |
| HSALNG0021534 | RNA Gene | 4 | GC02P 201187 | 1.004 889 | <a href="https://www.genecards.org/cgi-bin/carddisp.pl?gene=HSALNG0021534">https://www.genecards.org/cgi-bin/carddisp.pl?gene=HSALNG0021534</a> |
| HSALNG0021690 | RNA Gene | 4 | GC02M 203744 | 1.004 889 | <a href="https://www.genecards.org/cgi-bin/carddisp.pl?gene=HSALNG0021690">https://www.genecards.org/cgi-bin/carddisp.pl?gene=HSALNG0021690</a> |
| HSALNG0026407 | RNA Gene | 4 | GC03M 058193 | 1.004 889 | <a href="https://www.genecards.org/cgi-bin/carddisp.pl?gene=HSALNG0026407">https://www.genecards.org/cgi-bin/carddisp.pl?gene=HSALNG0026407</a> |

|                   |          |   |             |          |                                                                                                                                                         |
|-------------------|----------|---|-------------|----------|---------------------------------------------------------------------------------------------------------------------------------------------------------|
| HSALNG0032205     | RNA Gene | 4 | GC04P000972 | 1.004889 | <a href="https://www.genecards.org/cgi-bin/carddisp.pl?gene=HSALNG0032205">https://www.genecards.org/cgi-bin/carddisp.pl?gene=HSALNG0032205</a>         |
| HSALNG0033465     | RNA Gene | 4 | GC04M026097 | 1.004889 | <a href="https://www.genecards.org/cgi-bin/carddisp.pl?gene=HSALNG0033465">https://www.genecards.org/cgi-bin/carddisp.pl?gene=HSALNG0033465</a>         |
| HSALNG0035363     | RNA Gene | 4 | GC04M077554 | 1.004889 | <a href="https://www.genecards.org/cgi-bin/carddisp.pl?gene=HSALNG0035363">https://www.genecards.org/cgi-bin/carddisp.pl?gene=HSALNG0035363</a>         |
| HSALNG0035365     | RNA Gene | 4 | GC04M077627 | 1.004889 | <a href="https://www.genecards.org/cgi-bin/carddisp.pl?gene=HSALNG0035365">https://www.genecards.org/cgi-bin/carddisp.pl?gene=HSALNG0035365</a>         |
| HSALNG0049303     | RNA Gene | 4 | GC06P084583 | 1.004889 | <a href="https://www.genecards.org/cgi-bin/carddisp.pl?gene=HSALNG0049303">https://www.genecards.org/cgi-bin/carddisp.pl?gene=HSALNG0049303</a>         |
| HSALNG0049304     | RNA Gene | 4 | GC06P084584 | 1.004889 | <a href="https://www.genecards.org/cgi-bin/carddisp.pl?gene=HSALNG0049304">https://www.genecards.org/cgi-bin/carddisp.pl?gene=HSALNG0049304</a>         |
| HSALNG0049423     | RNA Gene | 4 | GC06P084611 | 1.004889 | <a href="https://www.genecards.org/cgi-bin/carddisp.pl?gene=HSALNG0049423">https://www.genecards.org/cgi-bin/carddisp.pl?gene=HSALNG0049423</a>         |
| HSALNG0058921     | RNA Gene | 4 | GC07P075447 | 1.004889 | <a href="https://www.genecards.org/cgi-bin/carddisp.pl?gene=HSALNG0058921">https://www.genecards.org/cgi-bin/carddisp.pl?gene=HSALNG0058921</a>         |
| HSALNG0061263     | RNA Gene | 4 | GC07P132006 | 1.004889 | <a href="https://www.genecards.org/cgi-bin/carddisp.pl?gene=HSALNG0061263">https://www.genecards.org/cgi-bin/carddisp.pl?gene=HSALNG0061263</a>         |
| HSALNG0067380     | RNA Gene | 4 | GC08M101435 | 1.004889 | <a href="https://www.genecards.org/cgi-bin/carddisp.pl?gene=HSALNG0067380">https://www.genecards.org/cgi-bin/carddisp.pl?gene=HSALNG0067380</a>         |
| HSALNG0068535     | RNA Gene | 4 | GC08M128542 | 1.004889 | <a href="https://www.genecards.org/cgi-bin/carddisp.pl?gene=HSALNG0068535">https://www.genecards.org/cgi-bin/carddisp.pl?gene=HSALNG0068535</a>         |
| HSALNG0068536-001 | RNA Gene | 4 | GC08P128544 | 1.004889 | <a href="https://www.genecards.org/cgi-bin/carddisp.pl?gene=HSALNG0068536-001">https://www.genecards.org/cgi-bin/carddisp.pl?gene=HSALNG0068536-001</a> |
| HSALNG0072212     | RNA Gene | 4 | GC09P081829 | 1.004889 | <a href="https://www.genecards.org/cgi-bin/carddisp.pl?gene=HSALNG0072212">https://www.genecards.org/cgi-bin/carddisp.pl?gene=HSALNG0072212</a>         |

|                   |          |   |             |          |                                                                                                                                                 |
|-------------------|----------|---|-------------|----------|-------------------------------------------------------------------------------------------------------------------------------------------------|
| HSALNG0074144     | RNA Gene | 4 | GC09P120897 | 1.004889 | <a href="https://www.genecards.org/cgi-bin/carddisp.pl?gene=HSALNG0074144">https://www.genecards.org/cgi-bin/carddisp.pl?gene=HSALNG0074144</a> |
| HSALNG0075945     | RNA Gene | 4 | GC10M006346 | 1.004889 | <a href="https://www.genecards.org/cgi-bin/carddisp.pl?gene=HSALNG0075945">https://www.genecards.org/cgi-bin/carddisp.pl?gene=HSALNG0075945</a> |
| HSALNG0078331     | RNA Gene | 4 | GC10P062683 | 1.004889 | <a href="https://www.genecards.org/cgi-bin/carddisp.pl?gene=HSALNG0078331">https://www.genecards.org/cgi-bin/carddisp.pl?gene=HSALNG0078331</a> |
| HSALNG0078621     | RNA Gene | 4 | GC10M070124 | 1.004889 | <a href="https://www.genecards.org/cgi-bin/carddisp.pl?gene=HSALNG0078621">https://www.genecards.org/cgi-bin/carddisp.pl?gene=HSALNG0078621</a> |
| HSALNG0080050     | RNA Gene | 4 | GC10M099531 | 1.004889 | <a href="https://www.genecards.org/cgi-bin/carddisp.pl?gene=HSALNG0080050">https://www.genecards.org/cgi-bin/carddisp.pl?gene=HSALNG0080050</a> |
| HSALNG0080051     | RNA Gene | 4 | GC10P099533 | 1.004889 | <a href="https://www.genecards.org/cgi-bin/carddisp.pl?gene=HSALNG0080051">https://www.genecards.org/cgi-bin/carddisp.pl?gene=HSALNG0080051</a> |
| HSALNG0080384     | RNA Gene | 4 | GC10P103659 | 1.004889 | <a href="https://www.genecards.org/cgi-bin/carddisp.pl?gene=HSALNG0080384">https://www.genecards.org/cgi-bin/carddisp.pl?gene=HSALNG0080384</a> |
| HSALNG0084497     | RNA Gene | 4 | GC11M090779 | 1.004889 | <a href="https://www.genecards.org/cgi-bin/carddisp.pl?gene=HSALNG0084497">https://www.genecards.org/cgi-bin/carddisp.pl?gene=HSALNG0084497</a> |
| HSALNG0084770     | RNA Gene | 4 | GC11P064273 | 1.004889 | <a href="https://www.genecards.org/cgi-bin/carddisp.pl?gene=HSALNG0084770">https://www.genecards.org/cgi-bin/carddisp.pl?gene=HSALNG0084770</a> |
| HSALNG0085864     | RNA Gene | 4 | GC11M076569 | 1.004889 | <a href="https://www.genecards.org/cgi-bin/carddisp.pl?gene=HSALNG0085864">https://www.genecards.org/cgi-bin/carddisp.pl?gene=HSALNG0085864</a> |
| HSALNG0085865     | RNA Gene | 4 | GC11P077996 | 1.004889 | <a href="https://www.genecards.org/cgi-bin/carddisp.pl?gene=HSALNG0085865">https://www.genecards.org/cgi-bin/carddisp.pl?gene=HSALNG0085865</a> |
| HSALNG0087579     | RNA Gene | 4 | GC11P118854 | 1.004889 | <a href="https://www.genecards.org/cgi-bin/carddisp.pl?gene=HSALNG0087579">https://www.genecards.org/cgi-bin/carddisp.pl?gene=HSALNG0087579</a> |
| HSALNG0087581     | RNA Gene | 4 | GC11M118867 | 1.004889 | <a href="https://www.genecards.org/cgi-bin/carddisp.pl?gene=HSALNG0087581">https://www.genecards.org/cgi-bin/carddisp.pl?gene=HSALNG0087581</a> |
| HSALNG0088091-002 | RNA Gene | 4 | GC11P128262 | 1.004889 | <a href="https://www.genecards.org/cgi-">https://www.genecards.org/cgi-</a>                                                                     |



|               |          |   |             |          |                                                                                                                                                 |
|---------------|----------|---|-------------|----------|-------------------------------------------------------------------------------------------------------------------------------------------------|
|               |          |   |             |          | bin/carddisp.pl?gene=HSALNG0088091-002                                                                                                          |
| HSALNG0088092 | RNA Gene | 4 | GC11M128259 | 1.004889 | <a href="https://www.genecards.org/cgi-bin/carddisp.pl?gene=HSALNG0088092">https://www.genecards.org/cgi-bin/carddisp.pl?gene=HSALNG0088092</a> |
| HSALNG0092390 | RNA Gene | 4 | GC12P072287 | 1.004889 | <a href="https://www.genecards.org/cgi-bin/carddisp.pl?gene=HSALNG0092390">https://www.genecards.org/cgi-bin/carddisp.pl?gene=HSALNG0092390</a> |
| HSALNG0094038 | RNA Gene | 4 | GC12P111446 | 1.004889 | <a href="https://www.genecards.org/cgi-bin/carddisp.pl?gene=HSALNG0094038">https://www.genecards.org/cgi-bin/carddisp.pl?gene=HSALNG0094038</a> |
| HSALNG0096509 | RNA Gene | 4 | GC13M039754 | 1.004889 | <a href="https://www.genecards.org/cgi-bin/carddisp.pl?gene=HSALNG0096509">https://www.genecards.org/cgi-bin/carddisp.pl?gene=HSALNG0096509</a> |
| HSALNG0101767 | RNA Gene | 4 | GC14M061406 | 1.004889 | <a href="https://www.genecards.org/cgi-bin/carddisp.pl?gene=HSALNG0101767">https://www.genecards.org/cgi-bin/carddisp.pl?gene=HSALNG0101767</a> |
| HSALNG0101768 | RNA Gene | 4 | GC14P061442 | 1.004889 | <a href="https://www.genecards.org/cgi-bin/carddisp.pl?gene=HSALNG0101768">https://www.genecards.org/cgi-bin/carddisp.pl?gene=HSALNG0101768</a> |
| HSALNG0101769 | RNA Gene | 4 | GC14P061525 | 1.004889 | <a href="https://www.genecards.org/cgi-bin/carddisp.pl?gene=HSALNG0101769">https://www.genecards.org/cgi-bin/carddisp.pl?gene=HSALNG0101769</a> |
| HSALNG0102088 | RNA Gene | 4 | GC14M068248 | 1.004889 | <a href="https://www.genecards.org/cgi-bin/carddisp.pl?gene=HSALNG0102088">https://www.genecards.org/cgi-bin/carddisp.pl?gene=HSALNG0102088</a> |
| HSALNG0102109 | RNA Gene | 4 | GC14M068741 | 1.004889 | <a href="https://www.genecards.org/cgi-bin/carddisp.pl?gene=HSALNG0102109">https://www.genecards.org/cgi-bin/carddisp.pl?gene=HSALNG0102109</a> |
| HSALNG0102110 | RNA Gene | 4 | GC14P068744 | 1.004889 | <a href="https://www.genecards.org/cgi-bin/carddisp.pl?gene=HSALNG0102110">https://www.genecards.org/cgi-bin/carddisp.pl?gene=HSALNG0102110</a> |
| HSALNG0106869 | RNA Gene | 4 | GC15P118498 | 1.004889 | <a href="https://www.genecards.org/cgi-bin/carddisp.pl?gene=HSALNG0106869">https://www.genecards.org/cgi-bin/carddisp.pl?gene=HSALNG0106869</a> |
| HSALNG0109614 | RNA Gene | 4 | GC16M011691 | 1.004889 | <a href="https://www.genecards.org/cgi-bin/carddisp.pl?gene=HSALNG0109614">https://www.genecards.org/cgi-bin/carddisp.pl?gene=HSALNG0109614</a> |
| HSALNG0109615 | RNA Gene | 4 | GC16M011707 | 1.004889 | <a href="https://www.genecards.org/cgi-bin/carddisp.pl?gene=HSALNG0109615">https://www.genecards.org/cgi-bin/carddisp.pl?gene=HSALNG0109615</a> |

|                   |          |   |             |          |                                                                                                                                                         |
|-------------------|----------|---|-------------|----------|---------------------------------------------------------------------------------------------------------------------------------------------------------|
|                   |          |   |             |          | <a href="#">bin/carddisp.pl?gene=HSALNG0109615</a>                                                                                                      |
| HSALNG0113252     | RNA Gene | 4 | GC16M085958 | 1.004889 | <a href="https://www.genecards.org/cgi-bin/carddisp.pl?gene=HSALNG0113252">https://www.genecards.org/cgi-bin/carddisp.pl?gene=HSALNG0113252</a>         |
| HSALNG0119020     | RNA Gene | 4 | GC17P078232 | 1.004889 | <a href="https://www.genecards.org/cgi-bin/carddisp.pl?gene=HSALNG0119020">https://www.genecards.org/cgi-bin/carddisp.pl?gene=HSALNG0119020</a>         |
| HSALNG0119021     | RNA Gene | 4 | GC17P078236 | 1.004889 | <a href="https://www.genecards.org/cgi-bin/carddisp.pl?gene=HSALNG0119021">https://www.genecards.org/cgi-bin/carddisp.pl?gene=HSALNG0119021</a>         |
| HSALNG0123927     | RNA Gene | 4 | GC19M010406 | 1.004889 | <a href="https://www.genecards.org/cgi-bin/carddisp.pl?gene=HSALNG0123927">https://www.genecards.org/cgi-bin/carddisp.pl?gene=HSALNG0123927</a>         |
| HSALNG0124504     | RNA Gene | 4 | GC19P067670 | 1.004889 | <a href="https://www.genecards.org/cgi-bin/carddisp.pl?gene=HSALNG0124504">https://www.genecards.org/cgi-bin/carddisp.pl?gene=HSALNG0124504</a>         |
| HSALNG0124505     | RNA Gene | 4 | GC19P067671 | 1.004889 | <a href="https://www.genecards.org/cgi-bin/carddisp.pl?gene=HSALNG0124505">https://www.genecards.org/cgi-bin/carddisp.pl?gene=HSALNG0124505</a>         |
| HSALNG0131362     | RNA Gene | 4 | GC20M059817 | 1.004889 | <a href="https://www.genecards.org/cgi-bin/carddisp.pl?gene=HSALNG0131362">https://www.genecards.org/cgi-bin/carddisp.pl?gene=HSALNG0131362</a>         |
| HSALNG0131698     | RNA Gene | 4 | GC20M063850 | 1.004889 | <a href="https://www.genecards.org/cgi-bin/carddisp.pl?gene=HSALNG0131698">https://www.genecards.org/cgi-bin/carddisp.pl?gene=HSALNG0131698</a>         |
| HSALNG0132884-001 | RNA Gene | 4 | GC21P035319 | 1.004889 | <a href="https://www.genecards.org/cgi-bin/carddisp.pl?gene=HSALNG0132884-001">https://www.genecards.org/cgi-bin/carddisp.pl?gene=HSALNG0132884-001</a> |
| HSALNG0132884-002 | RNA Gene | 4 | GC21P035358 | 1.004889 | <a href="https://www.genecards.org/cgi-bin/carddisp.pl?gene=HSALNG0132884-002">https://www.genecards.org/cgi-bin/carddisp.pl?gene=HSALNG0132884-002</a> |
| HSALNG0132885     | RNA Gene | 4 | GC21M035349 | 1.004889 | <a href="https://www.genecards.org/cgi-bin/carddisp.pl?gene=HSALNG0132885">https://www.genecards.org/cgi-bin/carddisp.pl?gene=HSALNG0132885</a>         |
| HSALNG0133192     | RNA Gene | 4 | GC21P041149 | 1.004889 | <a href="https://www.genecards.org/cgi-bin/carddisp.pl?gene=HSALNG0133192">https://www.genecards.org/cgi-bin/carddisp.pl?gene=HSALNG0133192</a>         |
| HSALNG0133311     | RNA Gene | 4 | GC21M042422 | 1.004889 | <a href="https://www.genecards.org/cgi-bin/carddisp.pl?gene=HSALNG0133311">https://www.genecards.org/cgi-bin/carddisp.pl?gene=HSALNG0133311</a>         |

|               |                              |                |   |             |          |                                                                  |
|---------------|------------------------------|----------------|---|-------------|----------|------------------------------------------------------------------|
|               |                              |                |   |             |          | bin/carddisp.pl?gene=HSALNG0133311                               |
| HSALNG0134046 |                              | RNA Gene       | 4 | GC22P035814 | 1.004889 | https://www.genecards.org/cgi-bin/carddisp.pl?gene=HSALNG0134046 |
| HSALNG0134239 |                              | RNA Gene       | 4 | GC22P037082 | 1.004889 | https://www.genecards.org/cgi-bin/carddisp.pl?gene=HSALNG0134239 |
| HSALNG0140819 |                              | RNA Gene       | 4 | GC0XP153988 | 1.004889 | https://www.genecards.org/cgi-bin/carddisp.pl?gene=HSALNG0140819 |
| KR153194-030  |                              | RNA Gene       | 4 | GC11P118807 | 1.004889 | https://www.genecards.org/cgi-bin/carddisp.pl?gene=KR153194-030  |
| KR1532266     |                              | RNA Gene       | 4 | GC09M123385 | 1.004889 | https://www.genecards.org/cgi-bin/carddisp.pl?gene=KR153226      |
| LOC105369568  | Uncharacterized LOC105369568 | RNA Gene       | 4 | GC11M128598 | 1.004889 | https://www.genecards.org/cgi-bin/carddisp.pl?gene=LOC105369568  |
| LOC105369750  | Uncharacterized LOC105369750 | RNA Gene       | 4 | GC12P048012 | 1.004889 | https://www.genecards.org/cgi-bin/carddisp.pl?gene=LOC105369750  |
| LOC105376481  | Uncharacterized LOC105376481 | RNA Gene       | 4 | GC10P031055 | 1.004889 | https://www.genecards.org/cgi-bin/carddisp.pl?gene=LOC105376481  |
| LOC105377296  | Uncharacterized LOC105377296 | RNA Gene       | 4 | GC04M077580 | 1.004889 | https://www.genecards.org/cgi-bin/carddisp.pl?gene=LOC105377296  |
| LOC107984079  | Uncharacterized LOC107984079 | RNA Gene       | 4 | GC03P058536 | 1.004889 | https://www.genecards.org/cgi-bin/carddisp.pl?gene=LOC107984079  |
| LOC107984788  | Uncharacterized LOC107984788 | RNA Gene       | 4 | GC15P118770 | 1.004889 | https://www.genecards.org/cgi-bin/carddisp.pl?gene=LOC107984788  |
| LOC124900645  | Uncharacterized LOC124900645 | RNA Gene       | 4 | GC04P000968 | 1.004889 | https://www.genecards.org/cgi-bin/carddisp.pl?gene=LOC124900645  |
| LOC124901449  | Uncharacterized LOC124901449 | Protein Coding | 4 | GC06P160592 | 1.004889 | https://www.genecards.org/cgi-bin/carddisp.pl?gene=LOC124901449  |

|                 |                              |                |   |             |          |                                                                                                                                               |
|-----------------|------------------------------|----------------|---|-------------|----------|-----------------------------------------------------------------------------------------------------------------------------------------------|
| LOC124901993    | Uncharacterized LOC124901993 | Protein Coding | 4 | GC08P101312 | 1.004889 | <a href="https://www.genecards.org/cgi-bin/carddisp.pl?gene=LOC124901993">https://www.genecards.org/cgi-bin/carddisp.pl?gene=LOC124901993</a> |
| LOC124902375    | Uncharacterized LOC124902375 | RNA Gene       | 4 | GC10P011186 | 1.004889 | <a href="https://www.genecards.org/cgi-bin/carddisp.pl?gene=LOC124902375">https://www.genecards.org/cgi-bin/carddisp.pl?gene=LOC124902375</a> |
| LOC124902435    | Uncharacterized LOC124902435 | RNA Gene       | 4 | GC10M061998 | 1.004889 | <a href="https://www.genecards.org/cgi-bin/carddisp.pl?gene=LOC124902435">https://www.genecards.org/cgi-bin/carddisp.pl?gene=LOC124902435</a> |
| LOC124903019    | Uncharacterized LOC124903019 | RNA Gene       | 4 | GC12M111432 | 1.004889 | <a href="https://www.genecards.org/cgi-bin/carddisp.pl?gene=LOC124903019">https://www.genecards.org/cgi-bin/carddisp.pl?gene=LOC124903019</a> |
| LOC124903774    | Uncharacterized LOC124903774 | RNA Gene       | 4 | GC16M050728 | 1.004889 | <a href="https://www.genecards.org/cgi-bin/carddisp.pl?gene=LOC124903774">https://www.genecards.org/cgi-bin/carddisp.pl?gene=LOC124903774</a> |
| MK280144-020    |                              | RNA Gene       | 4 | GC01P067362 | 1.004889 | <a href="https://www.genecards.org/cgi-bin/carddisp.pl?gene=MK280144-020">https://www.genecards.org/cgi-bin/carddisp.pl?gene=MK280144-020</a> |
| MK280144-291    |                              | RNA Gene       | 4 | GC18P017623 | 1.004889 | <a href="https://www.genecards.org/cgi-bin/carddisp.pl?gene=MK280144-291">https://www.genecards.org/cgi-bin/carddisp.pl?gene=MK280144-291</a> |
| MN298230        |                              | RNA Gene       | 4 | GC05P160444 | 1.004889 | <a href="https://www.genecards.org/cgi-bin/carddisp.pl?gene=MN298230">https://www.genecards.org/cgi-bin/carddisp.pl?gene=MN298230</a>         |
| MN298231        |                              | RNA Gene       | 4 | GC05M160458 | 1.004889 | <a href="https://www.genecards.org/cgi-bin/carddisp.pl?gene=MN298231">https://www.genecards.org/cgi-bin/carddisp.pl?gene=MN298231</a>         |
| MN308685        |                              | RNA Gene       | 4 | GC01P017083 | 1.004889 | <a href="https://www.genecards.org/cgi-bin/carddisp.pl?gene=MN308685">https://www.genecards.org/cgi-bin/carddisp.pl?gene=MN308685</a>         |
| MN308836        |                              | RNA Gene       | 4 | GC01P183559 | 1.004889 | <a href="https://www.genecards.org/cgi-bin/carddisp.pl?gene=MN308836">https://www.genecards.org/cgi-bin/carddisp.pl?gene=MN308836</a>         |
| MN308841        |                              | RNA Gene       | 4 | GC01P186678 | 1.004889 | <a href="https://www.genecards.org/cgi-bin/carddisp.pl?gene=MN308841">https://www.genecards.org/cgi-bin/carddisp.pl?gene=MN308841</a>         |
| MN309368        |                              | RNA Gene       | 4 | GC11M064281 | 1.004889 | <a href="https://www.genecards.org/cgi-bin/carddisp.pl?gene=MN309368">https://www.genecards.org/cgi-bin/carddisp.pl?gene=MN309368</a>         |
| NONHSAG019426.2 |                              | RNA Gene       | 4 | GC16P050713 | 1.004889 | <a href="https://www.genecards.org/cgi-">https://www.genecards.org/cgi-</a>                                                                   |

|                     |          |   |             |          |                                                                                                                                                             |
|---------------------|----------|---|-------------|----------|-------------------------------------------------------------------------------------------------------------------------------------------------------------|
|                     |          |   |             |          | <a href="https://www.genecards.org/cgi-bin/carddisp.pl?gene=NONHSAG019426.2">bin/carddisp.pl?gene=NONHSAG019426.2</a>                                       |
| NONHSAG031883.2-002 | RNA Gene | 4 | GC20P046128 | 1.004889 | <a href="https://www.genecards.org/cgi-bin/carddisp.pl?gene=NONHSAG031883.2-002">https://www.genecards.org/cgi-bin/carddisp.pl?gene=NONHSAG031883.2-002</a> |
| OA987689            | RNA Gene | 4 | GC21M041119 | 1.004889 | <a href="https://www.genecards.org/cgi-bin/carddisp.pl?gene=OA987689">https://www.genecards.org/cgi-bin/carddisp.pl?gene=OA987689</a>                       |
| RF00017-1458        | RNA Gene | 4 | GC14P068292 | 1.004889 | <a href="https://www.genecards.org/cgi-bin/carddisp.pl?gene=RF00017-1458">https://www.genecards.org/cgi-bin/carddisp.pl?gene=RF00017-1458</a>               |
| RF00017-3141        | RNA Gene | 4 | GC02P203756 | 1.004889 | <a href="https://www.genecards.org/cgi-bin/carddisp.pl?gene=RF00017-3141">https://www.genecards.org/cgi-bin/carddisp.pl?gene=RF00017-3141</a>               |
| RF00017-3469        | RNA Gene | 4 | GC22M037214 | 1.004889 | <a href="https://www.genecards.org/cgi-bin/carddisp.pl?gene=RF00017-3469">https://www.genecards.org/cgi-bin/carddisp.pl?gene=RF00017-3469</a>               |
| RF00017-4512        | RNA Gene | 4 | GC05P134091 | 1.004889 | <a href="https://www.genecards.org/cgi-bin/carddisp.pl?gene=RF00017-4512">https://www.genecards.org/cgi-bin/carddisp.pl?gene=RF00017-4512</a>               |
| RF00017-4513        | RNA Gene | 4 | GC05P134110 | 1.004889 | <a href="https://www.genecards.org/cgi-bin/carddisp.pl?gene=RF00017-4513">https://www.genecards.org/cgi-bin/carddisp.pl?gene=RF00017-4513</a>               |
| RF00017-4900        | RNA Gene | 4 | GC06P014082 | 1.004889 | <a href="https://www.genecards.org/cgi-bin/carddisp.pl?gene=RF00017-4900">https://www.genecards.org/cgi-bin/carddisp.pl?gene=RF00017-4900</a>               |
| RF00017-5281        | RNA Gene | 4 | GC06M090261 | 1.004889 | <a href="https://www.genecards.org/cgi-bin/carddisp.pl?gene=RF00017-5281">https://www.genecards.org/cgi-bin/carddisp.pl?gene=RF00017-5281</a>               |
| RF00017-5936        | RNA Gene | 4 | GC07M074515 | 1.004889 | <a href="https://www.genecards.org/cgi-bin/carddisp.pl?gene=RF00017-5936">https://www.genecards.org/cgi-bin/carddisp.pl?gene=RF00017-5936</a>               |
| RF00017-5942        | RNA Gene | 4 | GC07M074617 | 1.004889 | <a href="https://www.genecards.org/cgi-bin/carddisp.pl?gene=RF00017-5942">https://www.genecards.org/cgi-bin/carddisp.pl?gene=RF00017-5942</a>               |
| RF00017-6030        | RNA Gene | 4 | GC07P092606 | 1.004889 | <a href="https://www.genecards.org/cgi-bin/carddisp.pl?gene=RF00017-6030">https://www.genecards.org/cgi-bin/carddisp.pl?gene=RF00017-6030</a>               |
| RF00017-621         | RNA Gene | 4 | GC10M070222 | 1.004889 | <a href="https://www.genecards.org/cgi-bin/carddisp.pl?gene=RF00017-621">https://www.genecards.org/cgi-bin/carddisp.pl?gene=RF00017-621</a>                 |

|              |          |   |             |          |                                                                                                                                               |
|--------------|----------|---|-------------|----------|-----------------------------------------------------------------------------------------------------------------------------------------------|
|              |          |   |             |          | <a href="#">bin/carddisp.pl?gene=RF00017-621</a>                                                                                              |
| RF00017-6905 | RNA Gene | 4 | GC08M132150 | 1.004889 | <a href="https://www.genecards.org/cgi-bin/carddisp.pl?gene=RF00017-6905">https://www.genecards.org/cgi-bin/carddisp.pl?gene=RF00017-6905</a> |
| RF00017-7230 | RNA Gene | 4 | GC09M094978 | 1.004889 | <a href="https://www.genecards.org/cgi-bin/carddisp.pl?gene=RF00017-7230">https://www.genecards.org/cgi-bin/carddisp.pl?gene=RF00017-7230</a> |
| RF00019-027  | RNA Gene | 4 | GC13M039786 | 1.004889 | <a href="https://www.genecards.org/cgi-bin/carddisp.pl?gene=RF00019-027">https://www.genecards.org/cgi-bin/carddisp.pl?gene=RF00019-027</a>   |
| RF00026-971  | RNA Gene | 4 | GC07M028122 | 1.004889 | <a href="https://www.genecards.org/cgi-bin/carddisp.pl?gene=RF00026-971">https://www.genecards.org/cgi-bin/carddisp.pl?gene=RF00026-971</a>   |
| RF00951-116  | RNA Gene | 4 | GC04M026079 | 1.004889 | <a href="https://www.genecards.org/cgi-bin/carddisp.pl?gene=RF00951-116">https://www.genecards.org/cgi-bin/carddisp.pl?gene=RF00951-116</a>   |
| RF00994-491  | RNA Gene | 4 | GC02P070538 | 1.004889 | <a href="https://www.genecards.org/cgi-bin/carddisp.pl?gene=RF00994-491">https://www.genecards.org/cgi-bin/carddisp.pl?gene=RF00994-491</a>   |
| RF01016-017  | RNA Gene | 4 | GC07M092634 | 1.004889 | <a href="https://www.genecards.org/cgi-bin/carddisp.pl?gene=RF01016-017">https://www.genecards.org/cgi-bin/carddisp.pl?gene=RF01016-017</a>   |
| lnc-AHNAK2-1 | RNA Gene | 4 | GC14M104926 | 1.004889 | <a href="https://www.genecards.org/cgi-bin/carddisp.pl?gene=lnc-AHNAK2-1">https://www.genecards.org/cgi-bin/carddisp.pl?gene=lnc-AHNAK2-1</a> |
| lnc-AHNAK2-2 | RNA Gene | 4 | GC14M104927 | 1.004889 | <a href="https://www.genecards.org/cgi-bin/carddisp.pl?gene=lnc-AHNAK2-2">https://www.genecards.org/cgi-bin/carddisp.pl?gene=lnc-AHNAK2-2</a> |
| lnc-AHNAK2-3 | RNA Gene | 4 | GC14M104925 | 1.004889 | <a href="https://www.genecards.org/cgi-bin/carddisp.pl?gene=lnc-AHNAK2-3">https://www.genecards.org/cgi-bin/carddisp.pl?gene=lnc-AHNAK2-3</a> |
| lnc-AHNAK2-4 | RNA Gene | 4 | GC14M104948 | 1.004889 | <a href="https://www.genecards.org/cgi-bin/carddisp.pl?gene=lnc-AHNAK2-4">https://www.genecards.org/cgi-bin/carddisp.pl?gene=lnc-AHNAK2-4</a> |
| lnc-ARPC5-2  | RNA Gene | 4 | GC01M183560 | 1.004889 | <a href="https://www.genecards.org/cgi-bin/carddisp.pl?gene=lnc-ARPC5-2">https://www.genecards.org/cgi-bin/carddisp.pl?gene=lnc-ARPC5-2</a>   |
| lnc-CALHM3-2 | RNA Gene | 4 | GC10M103642 | 1.004889 | <a href="https://www.genecards.org/cgi-bin/carddisp.pl?gene=lnc-CALHM3-2">https://www.genecards.org/cgi-bin/carddisp.pl?gene=lnc-CALHM3-2</a> |

|                  |          |   |             |          |                                                                                                                                                       |
|------------------|----------|---|-------------|----------|-------------------------------------------------------------------------------------------------------------------------------------------------------|
| lnc-FCRL2-1      | RNA Gene | 4 | GC01M157697 | 1.004889 | <a href="https://www.genecards.org/cgi-bin/carddisp.pl?gene=lnc-FCRL2-1">https://www.genecards.org/cgi-bin/carddisp.pl?gene=lnc-FCRL2-1</a>           |
| lnc-FCRL3-2      | RNA Gene | 4 | GC01M157612 | 1.004889 | <a href="https://www.genecards.org/cgi-bin/carddisp.pl?gene=lnc-FCRL3-2">https://www.genecards.org/cgi-bin/carddisp.pl?gene=lnc-FCRL3-2</a>           |
| lnc-GATA3-19-002 | RNA Gene | 4 | GC10P009002 | 1.004889 | <a href="https://www.genecards.org/cgi-bin/carddisp.pl?gene=lnc-GATA3-19-002">https://www.genecards.org/cgi-bin/carddisp.pl?gene=lnc-GATA3-19-002</a> |
| lnc-LONRF2-2     | RNA Gene | 4 | GC02M100088 | 1.004889 | <a href="https://www.genecards.org/cgi-bin/carddisp.pl?gene=lnc-LONRF2-2">https://www.genecards.org/cgi-bin/carddisp.pl?gene=lnc-LONRF2-2</a>         |
| lnc-LONRF2-3     | RNA Gene | 4 | GC02M100036 | 1.004889 | <a href="https://www.genecards.org/cgi-bin/carddisp.pl?gene=lnc-LONRF2-3">https://www.genecards.org/cgi-bin/carddisp.pl?gene=lnc-LONRF2-3</a>         |
| lnc-NUP88-2      | RNA Gene | 4 | GC17M006180 | 1.004889 | <a href="https://www.genecards.org/cgi-bin/carddisp.pl?gene=lnc-NUP88-2">https://www.genecards.org/cgi-bin/carddisp.pl?gene=lnc-NUP88-2</a>           |
| lnc-PSMD5-5      | RNA Gene | 4 | GC09M120864 | 1.004889 | <a href="https://www.genecards.org/cgi-bin/carddisp.pl?gene=lnc-PSMD5-5">https://www.genecards.org/cgi-bin/carddisp.pl?gene=lnc-PSMD5-5</a>           |
| lnc-SLC37A1-2    | RNA Gene | 4 | GC21P042439 | 1.004889 | <a href="https://www.genecards.org/cgi-bin/carddisp.pl?gene=lnc-SLC37A1-2">https://www.genecards.org/cgi-bin/carddisp.pl?gene=lnc-SLC37A1-2</a>       |
| lnc-TMEM106C-4   | RNA Gene | 4 | GC12P048036 | 1.004889 | <a href="https://www.genecards.org/cgi-bin/carddisp.pl?gene=lnc-TMEM106C-4">https://www.genecards.org/cgi-bin/carddisp.pl?gene=lnc-TMEM106C-4</a>     |
| lnc-TNPO3-9      | RNA Gene | 4 | GC07M128953 | 1.004889 | <a href="https://www.genecards.org/cgi-bin/carddisp.pl?gene=lnc-TNPO3-9">https://www.genecards.org/cgi-bin/carddisp.pl?gene=lnc-TNPO3-9</a>           |
| lnc-YRDC-3       | RNA Gene | 4 | GC01M037827 | 1.004889 | <a href="https://www.genecards.org/cgi-bin/carddisp.pl?gene=lnc-YRDC-3">https://www.genecards.org/cgi-bin/carddisp.pl?gene=lnc-YRDC-3</a>             |
| lnc-ZBTB7C-8     | RNA Gene | 4 | GC18M048521 | 1.004889 | <a href="https://www.genecards.org/cgi-bin/carddisp.pl?gene=lnc-ZBTB7C-8">https://www.genecards.org/cgi-bin/carddisp.pl?gene=lnc-ZBTB7C-8</a>         |
| lnc-ZBTB7C-9     | RNA Gene | 4 | GC18M048411 | 1.004889 | <a href="https://www.genecards.org/cgi-bin/carddisp.pl?gene=lnc-ZBTB7C-9">https://www.genecards.org/cgi-bin/carddisp.pl?gene=lnc-ZBTB7C-9</a>         |
| lnc-ZNF785-4     | RNA Gene | 4 | GC16M037197 | 1.004889 | <a href="https://www.genecards.org/cgi-bin/carddisp.pl?gene=lnc-ZNF785-4">https://www.genecards.org/cgi-bin/carddisp.pl?gene=lnc-ZNF785-4</a>         |

|               |          |   |             |          |                                                                                                                                                |
|---------------|----------|---|-------------|----------|------------------------------------------------------------------------------------------------------------------------------------------------|
|               |          |   |             |          | <a href="http://www.genecards.org/cgi-bin/carddisp.pl?gene=lnc-ZNF785-4">bin/carddisp.pl?gene=lnc-ZNF785-4</a>                                 |
| lnc-ZBP2-1    | RNA Gene | 4 | GC17P039887 | 1.004889 | <a href="http://www.genecards.org/cgi-bin/carddisp.pl?gene=lnc-ZBP2-1">https://www.genecards.org/cgi-bin/carddisp.pl?gene=lnc-ZBP2-1</a>       |
| piR-30934     | RNA Gene | 4 | GC02P073990 | 1.004889 | <a href="http://www.genecards.org/cgi-bin/carddisp.pl?gene=piR-30934">https://www.genecards.org/cgi-bin/carddisp.pl?gene=piR-30934</a>         |
| piR-31199-079 | RNA Gene | 4 | GC12P120338 | 1.004889 | <a href="http://www.genecards.org/cgi-bin/carddisp.pl?gene=piR-31199-079">https://www.genecards.org/cgi-bin/carddisp.pl?gene=piR-31199-079</a> |
| piR-31508-004 | RNA Gene | 4 | GC01P116736 | 1.004889 | <a href="http://www.genecards.org/cgi-bin/carddisp.pl?gene=piR-31508-004">https://www.genecards.org/cgi-bin/carddisp.pl?gene=piR-31508-004</a> |
| piR-32214-368 | RNA Gene | 4 | GC02M037712 | 1.004889 | <a href="http://www.genecards.org/cgi-bin/carddisp.pl?gene=piR-32214-368">https://www.genecards.org/cgi-bin/carddisp.pl?gene=piR-32214-368</a> |
| piR-32297-006 | RNA Gene | 4 | GC14P075506 | 1.004889 | <a href="http://www.genecards.org/cgi-bin/carddisp.pl?gene=piR-32297-006">https://www.genecards.org/cgi-bin/carddisp.pl?gene=piR-32297-006</a> |
| piR-32314-017 | RNA Gene | 4 | GC04P026097 | 1.004889 | <a href="http://www.genecards.org/cgi-bin/carddisp.pl?gene=piR-32314-017">https://www.genecards.org/cgi-bin/carddisp.pl?gene=piR-32314-017</a> |
| piR-32461-022 | RNA Gene | 4 | GC10M062677 | 1.004889 | <a href="http://www.genecards.org/cgi-bin/carddisp.pl?gene=piR-32461-022">https://www.genecards.org/cgi-bin/carddisp.pl?gene=piR-32461-022</a> |
| piR-33303-125 | RNA Gene | 4 | GC04M077625 | 1.004889 | <a href="http://www.genecards.org/cgi-bin/carddisp.pl?gene=piR-33303-125">https://www.genecards.org/cgi-bin/carddisp.pl?gene=piR-33303-125</a> |
| piR-34822-252 | RNA Gene | 4 | GC04M122090 | 1.004889 | <a href="http://www.genecards.org/cgi-bin/carddisp.pl?gene=piR-34822-252">https://www.genecards.org/cgi-bin/carddisp.pl?gene=piR-34822-252</a> |
| piR-36455     | RNA Gene | 4 | GC12M111444 | 1.004889 | <a href="http://www.genecards.org/cgi-bin/carddisp.pl?gene=piR-36455">https://www.genecards.org/cgi-bin/carddisp.pl?gene=piR-36455</a>         |
| piR-37170-024 | RNA Gene | 4 | GC14P068303 | 1.004889 | <a href="http://www.genecards.org/cgi-bin/carddisp.pl?gene=piR-37170-024">https://www.genecards.org/cgi-bin/carddisp.pl?gene=piR-37170-024</a> |
| piR-38259     | RNA Gene | 4 | GC12M111535 | 1.004889 | <a href="http://www.genecards.org/cgi-bin/carddisp.pl?gene=piR-38259">https://www.genecards.org/cgi-bin/carddisp.pl?gene=piR-38259</a>         |



|               |          |   |             |          |                                                                                                                                                 |
|---------------|----------|---|-------------|----------|-------------------------------------------------------------------------------------------------------------------------------------------------|
| piR-38580-086 | RNA Gene | 4 | GC14M068290 | 1.004889 | <a href="https://www.genecards.org/cgi-bin/carddisp.pl?gene=piR-38580-086">https://www.genecards.org/cgi-bin/carddisp.pl?gene=piR-38580-086</a> |
| piR-39341-038 | RNA Gene | 4 | GC10P031110 | 1.004889 | <a href="https://www.genecards.org/cgi-bin/carddisp.pl?gene=piR-39341-038">https://www.genecards.org/cgi-bin/carddisp.pl?gene=piR-39341-038</a> |
| piR-39701-054 | RNA Gene | 4 | GC06M090275 | 1.004889 | <a href="https://www.genecards.org/cgi-bin/carddisp.pl?gene=piR-39701-054">https://www.genecards.org/cgi-bin/carddisp.pl?gene=piR-39701-054</a> |
| piR-39904-007 | RNA Gene | 4 | GC14M075433 | 1.004889 | <a href="https://www.genecards.org/cgi-bin/carddisp.pl?gene=piR-39904-007">https://www.genecards.org/cgi-bin/carddisp.pl?gene=piR-39904-007</a> |
| piR-40610     | RNA Gene | 4 | GC22P038498 | 1.004889 | <a href="https://www.genecards.org/cgi-bin/carddisp.pl?gene=piR-40610">https://www.genecards.org/cgi-bin/carddisp.pl?gene=piR-40610</a>         |
| piR-41306-234 | RNA Gene | 4 | GC06P137911 | 1.004889 | <a href="https://www.genecards.org/cgi-bin/carddisp.pl?gene=piR-41306-234">https://www.genecards.org/cgi-bin/carddisp.pl?gene=piR-41306-234</a> |
| piR-48007     | RNA Gene | 4 | GC12M111540 | 1.004889 | <a href="https://www.genecards.org/cgi-bin/carddisp.pl?gene=piR-48007">https://www.genecards.org/cgi-bin/carddisp.pl?gene=piR-48007</a>         |
| piR-48077     | RNA Gene | 4 | GC19P068867 | 1.004889 | <a href="https://www.genecards.org/cgi-bin/carddisp.pl?gene=piR-48077">https://www.genecards.org/cgi-bin/carddisp.pl?gene=piR-48077</a>         |
| piR-48156     | RNA Gene | 4 | GC21M035356 | 1.004889 | <a href="https://www.genecards.org/cgi-bin/carddisp.pl?gene=piR-48156">https://www.genecards.org/cgi-bin/carddisp.pl?gene=piR-48156</a>         |
| piR-48209-054 | RNA Gene | 4 | GC10P006468 | 1.004889 | <a href="https://www.genecards.org/cgi-bin/carddisp.pl?gene=piR-48209-054">https://www.genecards.org/cgi-bin/carddisp.pl?gene=piR-48209-054</a> |
| piR-48222-172 | RNA Gene | 4 | GC02P037723 | 1.004889 | <a href="https://www.genecards.org/cgi-bin/carddisp.pl?gene=piR-48222-172">https://www.genecards.org/cgi-bin/carddisp.pl?gene=piR-48222-172</a> |
| piR-48325-110 | RNA Gene | 4 | GC21M039092 | 1.004889 | <a href="https://www.genecards.org/cgi-bin/carddisp.pl?gene=piR-48325-110">https://www.genecards.org/cgi-bin/carddisp.pl?gene=piR-48325-110</a> |
| piR-49399-010 | RNA Gene | 4 | GC06P086729 | 1.004889 | <a href="https://www.genecards.org/cgi-bin/carddisp.pl?gene=piR-49399-010">https://www.genecards.org/cgi-bin/carddisp.pl?gene=piR-49399-010</a> |
| piR-50346     | RNA Gene | 4 | GC12M111541 | 1.004889 | <a href="https://www.genecards.org/cgi-bin/carddisp.pl?gene=piR-50346">https://www.genecards.org/cgi-bin/carddisp.pl?gene=piR-50346</a>         |

|               |          |   |             |          |                                                                                                                                                |
|---------------|----------|---|-------------|----------|------------------------------------------------------------------------------------------------------------------------------------------------|
|               |          |   |             |          | <a href="http://www.genecards.org/cgi-bin/carddisp.pl?gene=piR-50346">bin/carddisp.pl?gene=piR-50346</a>                                       |
| piR-50444-644 | RNA Gene | 4 | GC09M094818 | 1.004889 | <a href="http://www.genecards.org/cgi-bin/carddisp.pl?gene=piR-50444-644">https://www.genecards.org/cgi-bin/carddisp.pl?gene=piR-50444-644</a> |
| piR-51327     | RNA Gene | 4 | GC12M111437 | 1.004889 | <a href="http://www.genecards.org/cgi-bin/carddisp.pl?gene=piR-51327">https://www.genecards.org/cgi-bin/carddisp.pl?gene=piR-51327</a>         |
| piR-51449     | RNA Gene | 4 | GC12P111448 | 1.004889 | <a href="http://www.genecards.org/cgi-bin/carddisp.pl?gene=piR-51449">https://www.genecards.org/cgi-bin/carddisp.pl?gene=piR-51449</a>         |
| piR-52008-011 | RNA Gene | 4 | GC02M203881 | 1.004889 | <a href="http://www.genecards.org/cgi-bin/carddisp.pl?gene=piR-52008-011">https://www.genecards.org/cgi-bin/carddisp.pl?gene=piR-52008-011</a> |
| piR-52079-091 | RNA Gene | 4 | GC18M069859 | 1.004889 | <a href="http://www.genecards.org/cgi-bin/carddisp.pl?gene=piR-52079-091">https://www.genecards.org/cgi-bin/carddisp.pl?gene=piR-52079-091</a> |
| piR-52916-031 | RNA Gene | 4 | GC06M159081 | 1.004889 | <a href="http://www.genecards.org/cgi-bin/carddisp.pl?gene=piR-52916-031">https://www.genecards.org/cgi-bin/carddisp.pl?gene=piR-52916-031</a> |
| piR-53184     | RNA Gene | 4 | GC22P038660 | 1.004889 | <a href="http://www.genecards.org/cgi-bin/carddisp.pl?gene=piR-53184">https://www.genecards.org/cgi-bin/carddisp.pl?gene=piR-53184</a>         |
| piR-54014     | RNA Gene | 4 | GC19P010470 | 1.004889 | <a href="http://www.genecards.org/cgi-bin/carddisp.pl?gene=piR-54014">https://www.genecards.org/cgi-bin/carddisp.pl?gene=piR-54014</a>         |
| piR-55194-146 | RNA Gene | 4 | GC15P120150 | 1.004889 | <a href="http://www.genecards.org/cgi-bin/carddisp.pl?gene=piR-55194-146">https://www.genecards.org/cgi-bin/carddisp.pl?gene=piR-55194-146</a> |
| piR-56480-015 | RNA Gene | 4 | GC12M111439 | 1.004889 | <a href="http://www.genecards.org/cgi-bin/carddisp.pl?gene=piR-56480-015">https://www.genecards.org/cgi-bin/carddisp.pl?gene=piR-56480-015</a> |
| piR-56883-151 | RNA Gene | 4 | GC05P132118 | 1.004889 | <a href="http://www.genecards.org/cgi-bin/carddisp.pl?gene=piR-56883-151">https://www.genecards.org/cgi-bin/carddisp.pl?gene=piR-56883-151</a> |
| piR-57135-050 | RNA Gene | 4 | GC06P106162 | 1.004889 | <a href="http://www.genecards.org/cgi-bin/carddisp.pl?gene=piR-57135-050">https://www.genecards.org/cgi-bin/carddisp.pl?gene=piR-57135-050</a> |
| piR-57461-124 | RNA Gene | 4 | GC02M201198 | 1.004889 | <a href="http://www.genecards.org/cgi-bin/carddisp.pl?gene=piR-57461-124">https://www.genecards.org/cgi-bin/carddisp.pl?gene=piR-57461-124</a> |

|                 |               |                |   |             |          |                                                                                                                                                     |
|-----------------|---------------|----------------|---|-------------|----------|-----------------------------------------------------------------------------------------------------------------------------------------------------|
| piR-60051-103   |               | RNA Gene       | 4 | GC09P123403 | 1.004889 | <a href="https://www.genecards.org/cgi-bin/carddisp.pl?gene=piR-60051-103">https://www.genecards.org/cgi-bin/carddisp.pl?gene=piR-60051-103</a>     |
| piR-61240-151   |               | RNA Gene       | 4 | GC02M191093 | 1.004889 | <a href="https://www.genecards.org/cgi-bin/carddisp.pl?gene=piR-61240-151">https://www.genecards.org/cgi-bin/carddisp.pl?gene=piR-61240-151</a>     |
| ENSG00000289491 | Novel Protein | Protein Coding | 3 | GC16M037479 | 1.004889 | <a href="https://www.genecards.org/cgi-bin/carddisp.pl?gene=ENSG00000289491">https://www.genecards.org/cgi-bin/carddisp.pl?gene=ENSG00000289491</a> |
| HE856162        |               | RNA Gene       | 3 | GC03P017041 | 1.004889 | <a href="https://www.genecards.org/cgi-bin/carddisp.pl?gene=HE856162">https://www.genecards.org/cgi-bin/carddisp.pl?gene=HE856162</a>               |
| HSALNG0001265   |               | RNA Gene       | 3 | GC01M017316 | 1.004889 | <a href="https://www.genecards.org/cgi-bin/carddisp.pl?gene=HSALNG0001265">https://www.genecards.org/cgi-bin/carddisp.pl?gene=HSALNG0001265</a>     |
| HSALNG0001266   |               | RNA Gene       | 3 | GC01M018068 | 1.004889 | <a href="https://www.genecards.org/cgi-bin/carddisp.pl?gene=HSALNG0001266">https://www.genecards.org/cgi-bin/carddisp.pl?gene=HSALNG0001266</a>     |
| HSALNG0001267   |               | RNA Gene       | 3 | GC01P017351 | 1.004889 | <a href="https://www.genecards.org/cgi-bin/carddisp.pl?gene=HSALNG0001267">https://www.genecards.org/cgi-bin/carddisp.pl?gene=HSALNG0001267</a>     |
| HSALNG0008511   |               | RNA Gene       | 3 | GC01P173345 | 1.004889 | <a href="https://www.genecards.org/cgi-bin/carddisp.pl?gene=HSALNG0008511">https://www.genecards.org/cgi-bin/carddisp.pl?gene=HSALNG0008511</a>     |
| HSALNG0026408   |               | RNA Gene       | 3 | GC03P058194 | 1.004889 | <a href="https://www.genecards.org/cgi-bin/carddisp.pl?gene=HSALNG0026408">https://www.genecards.org/cgi-bin/carddisp.pl?gene=HSALNG0026408</a>     |
| HSALNG0026409   |               | RNA Gene       | 3 | GC03P058202 | 1.004889 | <a href="https://www.genecards.org/cgi-bin/carddisp.pl?gene=HSALNG0026409">https://www.genecards.org/cgi-bin/carddisp.pl?gene=HSALNG0026409</a>     |
| HSALNG0086584   |               | RNA Gene       | 3 | GC11M095569 | 1.004889 | <a href="https://www.genecards.org/cgi-bin/carddisp.pl?gene=HSALNG0086584">https://www.genecards.org/cgi-bin/carddisp.pl?gene=HSALNG0086584</a>     |
| HSALNG0086587   |               | RNA Gene       | 3 | GC11M095590 | 1.004889 | <a href="https://www.genecards.org/cgi-bin/carddisp.pl?gene=HSALNG0086587">https://www.genecards.org/cgi-bin/carddisp.pl?gene=HSALNG0086587</a>     |
| HSALNG0121440   |               | RNA Gene       | 3 | GC18P048493 | 1.004889 | <a href="https://www.genecards.org/cgi-bin/carddisp.pl?gene=HSALNG0121440">https://www.genecards.org/cgi-bin/carddisp.pl?gene=HSALNG0121440</a>     |
| HSALNG0134045   |               | RNA Gene       | 3 | GC22M019748 | 1.004889 | <a href="https://www.genecards.org/cgi-bin/carddisp.pl?gene=HSALNG0134045">https://www.genecards.org/cgi-bin/carddisp.pl?gene=HSALNG0134045</a>     |

|               |                              |          |   |             |          |                                                                                                                                                              |
|---------------|------------------------------|----------|---|-------------|----------|--------------------------------------------------------------------------------------------------------------------------------------------------------------|
|               |                              |          |   |             |          | <a href="http://www.ncbi.nlm.nih.gov/ncbi/cdd/bin/cdddisp.pl?gene=HSA134045">bin/cdddisp.pl?gene=HSA134045</a>                                               |
| LOC105374465  | Uncharacterized LOC105374465 | RNA Gene | 3 | GC02M037719 | 1.004889 | <a href="http://www.ncbi.nlm.nih.gov/ncbi/cdd/bin/cdddisp.pl?gene=LOC105374465">https://www.ncbi.nlm.nih.gov/ncbi/cdd/bin/cdddisp.pl?gene=LOC105374465</a>   |
| LOC105374939  | Uncharacterized LOC105374939 | RNA Gene | 3 | GC06P014098 | 1.004889 | <a href="http://www.ncbi.nlm.nih.gov/ncbi/cdd/bin/cdddisp.pl?gene=LOC105374939">https://www.ncbi.nlm.nih.gov/ncbi/cdd/bin/cdddisp.pl?gene=LOC105374939</a>   |
| LOC107986672  | Uncharacterized LOC107986672 | RNA Gene | 3 | GC06M167127 | 1.004889 | <a href="http://www.ncbi.nlm.nih.gov/ncbi/cdd/bin/cdddisp.pl?gene=LOC107986672">https://www.ncbi.nlm.nih.gov/ncbi/cdd/bin/cdddisp.pl?gene=LOC107986672</a>   |
| LOC124902927  | Uncharacterized LOC124902927 | RNA Gene | 3 | GC12M048022 | 1.004889 | <a href="http://www.ncbi.nlm.nih.gov/ncbi/cdd/bin/cdddisp.pl?gene=LOC124902927">https://www.ncbi.nlm.nih.gov/ncbi/cdd/bin/cdddisp.pl?gene=LOC124902927</a>   |
| LOC124903741  | Uncharacterized LOC124903741 | RNA Gene | 3 | GC16M085977 | 1.004889 | <a href="http://www.ncbi.nlm.nih.gov/ncbi/cdd/bin/cdddisp.pl?gene=LOC124903741">https://www.ncbi.nlm.nih.gov/ncbi/cdd/bin/cdddisp.pl?gene=LOC124903741</a>   |
| RF00017-4901  |                              | RNA Gene | 3 | GC06M014110 | 1.004889 | <a href="http://www.ncbi.nlm.nih.gov/ncbi/cdd/bin/cdddisp.pl?gene=RF00017-4901">https://www.ncbi.nlm.nih.gov/ncbi/cdd/bin/cdddisp.pl?gene=RF00017-4901</a>   |
| lnc-PHYKPL-1  |                              | RNA Gene | 3 | GC05M178190 | 1.004889 | <a href="http://www.ncbi.nlm.nih.gov/ncbi/cdd/bin/cdddisp.pl?gene=lnc-PHYKPL-1">https://www.ncbi.nlm.nih.gov/ncbi/cdd/bin/cdddisp.pl?gene=lnc-PHYKPL-1</a>   |
| piR-31162-423 |                              | RNA Gene | 3 | GC06P085737 | 1.004889 | <a href="http://www.ncbi.nlm.nih.gov/ncbi/cdd/bin/cdddisp.pl?gene=piR-31162-423">https://www.ncbi.nlm.nih.gov/ncbi/cdd/bin/cdddisp.pl?gene=piR-31162-423</a> |
| piR-31432-579 |                              | RNA Gene | 3 | GC06P085771 | 1.004889 | <a href="http://www.ncbi.nlm.nih.gov/ncbi/cdd/bin/cdddisp.pl?gene=piR-31432-579">https://www.ncbi.nlm.nih.gov/ncbi/cdd/bin/cdddisp.pl?gene=piR-31432-579</a> |
| piR-31432-580 |                              | RNA Gene | 3 | GC06M032594 | 1.004889 | <a href="http://www.ncbi.nlm.nih.gov/ncbi/cdd/bin/cdddisp.pl?gene=piR-31432-580">https://www.ncbi.nlm.nih.gov/ncbi/cdd/bin/cdddisp.pl?gene=piR-31432-580</a> |
| piR-43099-508 |                              | RNA Gene | 3 | GC06P086515 | 1.004889 | <a href="http://www.ncbi.nlm.nih.gov/ncbi/cdd/bin/cdddisp.pl?gene=piR-43099-508">https://www.ncbi.nlm.nih.gov/ncbi/cdd/bin/cdddisp.pl?gene=piR-43099-508</a> |
| piR-43583-375 |                              | RNA Gene | 3 | GC03M020778 | 1.004889 | <a href="http://www.ncbi.nlm.nih.gov/ncbi/cdd/bin/cdddisp.pl?gene=piR-43583-375">https://www.ncbi.nlm.nih.gov/ncbi/cdd/bin/cdddisp.pl?gene=piR-43583-375</a> |
| piR-43583-471 |                              | RNA Gene | 3 | GC06P086540 | 1.004889 | <a href="http://www.ncbi.nlm.nih.gov/ncbi/cdd/bin/cdddisp.pl?gene=piR-43583-471">https://www.ncbi.nlm.nih.gov/ncbi/cdd/bin/cdddisp.pl?gene=piR-43583-471</a> |

|                  |                              |          |   |             |          |                                                                                                                                                       |
|------------------|------------------------------|----------|---|-------------|----------|-------------------------------------------------------------------------------------------------------------------------------------------------------|
| piR-45471-521    |                              | RNA Gene | 3 | GC06M032532 | 1.004889 | <a href="https://www.genecards.org/cgi-bin/carddisp.pl?gene=piR-45471-521">https://www.genecards.org/cgi-bin/carddisp.pl?gene=piR-45471-521</a>       |
| piR-46662-570    |                              | RNA Gene | 3 | GC06M066009 | 1.004889 | <a href="https://www.genecards.org/cgi-bin/carddisp.pl?gene=piR-46662-570">https://www.genecards.org/cgi-bin/carddisp.pl?gene=piR-46662-570</a>       |
| piR-46756-002    |                              | RNA Gene | 3 | GC06M032538 | 1.004889 | <a href="https://www.genecards.org/cgi-bin/carddisp.pl?gene=piR-46756-002">https://www.genecards.org/cgi-bin/carddisp.pl?gene=piR-46756-002</a>       |
| piR-48049-069    |                              | RNA Gene | 3 | GC06M066004 | 1.004889 | <a href="https://www.genecards.org/cgi-bin/carddisp.pl?gene=piR-48049-069">https://www.genecards.org/cgi-bin/carddisp.pl?gene=piR-48049-069</a>       |
| piR-50308-545    |                              | RNA Gene | 3 | GC06P086752 | 1.004889 | <a href="https://www.genecards.org/cgi-bin/carddisp.pl?gene=piR-50308-545">https://www.genecards.org/cgi-bin/carddisp.pl?gene=piR-50308-545</a>       |
| piR-53431-591    |                              | RNA Gene | 3 | GC06P086858 | 1.004889 | <a href="https://www.genecards.org/cgi-bin/carddisp.pl?gene=piR-53431-591">https://www.genecards.org/cgi-bin/carddisp.pl?gene=piR-53431-591</a>       |
| piR-55072-002    |                              | RNA Gene | 3 | GC21P044234 | 1.004889 | <a href="https://www.genecards.org/cgi-bin/carddisp.pl?gene=piR-55072-002">https://www.genecards.org/cgi-bin/carddisp.pl?gene=piR-55072-002</a>       |
| piR-55654-437    |                              | RNA Gene | 3 | GC06P086927 | 1.004889 | <a href="https://www.genecards.org/cgi-bin/carddisp.pl?gene=piR-55654-437">https://www.genecards.org/cgi-bin/carddisp.pl?gene=piR-55654-437</a>       |
| piR-61028-492    |                              | RNA Gene | 3 | GC06M066015 | 1.004889 | <a href="https://www.genecards.org/cgi-bin/carddisp.pl?gene=piR-61028-492">https://www.genecards.org/cgi-bin/carddisp.pl?gene=piR-61028-492</a>       |
| HSALNG0025953    |                              | RNA Gene | 2 | GC03M049658 | 1.004889 | <a href="https://www.genecards.org/cgi-bin/carddisp.pl?gene=HSALNG0025953">https://www.genecards.org/cgi-bin/carddisp.pl?gene=HSALNG0025953</a>       |
| LOC105371505     | Uncharacterized LOC105371505 | RNA Gene | 2 | GC17M006179 | 1.004889 | <a href="https://www.genecards.org/cgi-bin/carddisp.pl?gene=LOC105371505">https://www.genecards.org/cgi-bin/carddisp.pl?gene=LOC105371505</a>         |
| LOC124903678     | Uncharacterized LOC124903678 | RNA Gene | 2 | GC16P041517 | 1.004889 | <a href="https://www.genecards.org/cgi-bin/carddisp.pl?gene=LOC124903678">https://www.genecards.org/cgi-bin/carddisp.pl?gene=LOC124903678</a>         |
| hsa-miR-5095-132 |                              | RNA Gene | 2 | GC14M054885 | 1.004889 | <a href="https://www.genecards.org/cgi-bin/carddisp.pl?gene=hsa-miR-5095-132">https://www.genecards.org/cgi-bin/carddisp.pl?gene=hsa-miR-5095-132</a> |
| piR-49732-109    |                              | RNA Gene | 2 | GC12M056617 | 1.004889 | <a href="https://www.genecards.org/cgi-bin/carddisp.pl?gene=piR-49732-109">https://www.genecards.org/cgi-bin/carddisp.pl?gene=piR-49732-109</a>       |

|        |                                                    |                |    |             |          |                                                                                                                                          |
|--------|----------------------------------------------------|----------------|----|-------------|----------|------------------------------------------------------------------------------------------------------------------------------------------|
|        |                                                    |                |    |             |          | <a href="http://www.ncbi.nlm.nih.gov/ncbi/cdd/bin/carddisp.pl?gene=piR-49732-109">bin/carddisp.pl?gene=piR-49732-109</a>                 |
| P2RY12 | Purinergic Receptor P2Y12                          | Protein Coding | 46 | GC03M151336 | 1.001303 | <a href="http://www.ncbi.nlm.nih.gov/ncbi/cdd/bin/carddisp.pl?gene=P2RY12">https://www.genecards.org/cgi-bin/carddisp.pl?gene=P2RY12</a> |
| P2RY1  | Purinergic Receptor P2Y1                           | Protein Coding | 45 | GC03P152835 | 1.001303 | <a href="http://www.ncbi.nlm.nih.gov/ncbi/cdd/bin/carddisp.pl?gene=P2RY1">https://www.genecards.org/cgi-bin/carddisp.pl?gene=P2RY1</a>   |
| P2RY2  | Purinergic Receptor P2Y2                           | Protein Coding | 44 | GC11P073202 | 1.001303 | <a href="http://www.ncbi.nlm.nih.gov/ncbi/cdd/bin/carddisp.pl?gene=P2RY2">https://www.genecards.org/cgi-bin/carddisp.pl?gene=P2RY2</a>   |
| P2RX1  | Purinergic Receptor P2X 1                          | Protein Coding | 42 | GC17M003896 | 1.001303 | <a href="http://www.ncbi.nlm.nih.gov/ncbi/cdd/bin/carddisp.pl?gene=P2RX1">https://www.genecards.org/cgi-bin/carddisp.pl?gene=P2RX1</a>   |
| P2RX2  | Purinergic Receptor P2X 2                          | Protein Coding | 42 | GC12P132618 | 1.001303 | <a href="http://www.ncbi.nlm.nih.gov/ncbi/cdd/bin/carddisp.pl?gene=P2RX2">https://www.genecards.org/cgi-bin/carddisp.pl?gene=P2RX2</a>   |
| P2RY6  | Pyrimidinergic Receptor P2Y6                       | Protein Coding | 40 | GC11P073264 | 1.001303 | <a href="http://www.ncbi.nlm.nih.gov/ncbi/cdd/bin/carddisp.pl?gene=P2RY6">https://www.genecards.org/cgi-bin/carddisp.pl?gene=P2RY6</a>   |
| P2RY4  | Pyrimidinergic Receptor P2Y4                       | Protein Coding | 39 | GC0XM070258 | 1.001303 | <a href="http://www.ncbi.nlm.nih.gov/ncbi/cdd/bin/carddisp.pl?gene=P2RY4">https://www.genecards.org/cgi-bin/carddisp.pl?gene=P2RY4</a>   |
| P2RX5  | Purinergic Receptor P2X 5                          | Protein Coding | 38 | GC17M003672 | 1.001303 | <a href="http://www.ncbi.nlm.nih.gov/ncbi/cdd/bin/carddisp.pl?gene=P2RX5">https://www.genecards.org/cgi-bin/carddisp.pl?gene=P2RX5</a>   |
| NOX5   | NADPH Oxidase 5                                    | Protein Coding | 37 | GC15P117544 | 1.001303 | <a href="http://www.ncbi.nlm.nih.gov/ncbi/cdd/bin/carddisp.pl?gene=NOX5">https://www.genecards.org/cgi-bin/carddisp.pl?gene=NOX5</a>     |
| HIVEP3 | HIVEP Zinc Finger 3                                | Protein Coding | 35 | GC01M041506 | 1.000021 | <a href="http://www.ncbi.nlm.nih.gov/ncbi/cdd/bin/carddisp.pl?gene=HIVEP3">https://www.genecards.org/cgi-bin/carddisp.pl?gene=HIVEP3</a> |
| SNHG1  | Small Nucleolar RNA Host Gene 1                    | RNA Gene       | 21 | GC11M089641 | 1.000021 | <a href="http://www.ncbi.nlm.nih.gov/ncbi/cdd/bin/carddisp.pl?gene=SNHG1">https://www.genecards.org/cgi-bin/carddisp.pl?gene=SNHG1</a>   |
| GRIN2D | Glutamate Ionotropic Receptor NMDA Type Subunit 2D | Protein Coding | 47 | GC19P067036 | 0.998033 | <a href="http://www.ncbi.nlm.nih.gov/ncbi/cdd/bin/carddisp.pl?gene=GRIN2D">https://www.genecards.org/cgi-bin/carddisp.pl?gene=GRIN2D</a> |
| SCN9A  | Sodium Voltage-Gated Channel Alpha Subunit 9       | Protein Coding | 47 | GC02M166195 | 0.998033 | <a href="http://www.ncbi.nlm.nih.gov/ncbi/cdd/bin/carddisp.pl?gene=SCN9A">https://www.genecards.org/cgi-bin/carddisp.pl?gene=SCN9A</a>   |

|         |                                                  |                |    |             |          |                                                                                                                                     |
|---------|--------------------------------------------------|----------------|----|-------------|----------|-------------------------------------------------------------------------------------------------------------------------------------|
| HTR3B   | 5-Hydroxytryptamine Receptor 3B                  | Protein Coding | 44 | GC11P113956 | 0.998033 | <a href="https://www.genecards.org/cgi-bin/carddisp.pl?gene=HTR3B">https://www.genecards.org/cgi-bin/carddisp.pl?gene=HTR3B</a>     |
| PPME1   | Protein Phosphatase Methylesterase 1             | Protein Coding | 38 | GC11P074170 | 0.998033 | <a href="https://www.genecards.org/cgi-bin/carddisp.pl?gene=PPME1">https://www.genecards.org/cgi-bin/carddisp.pl?gene=PPME1</a>     |
| PPP2R5A | Protein Phosphatase 2 Regulatory Subunit B'Alpha | Protein Coding | 38 | GC01P212285 | 0.998033 | <a href="https://www.genecards.org/cgi-bin/carddisp.pl?gene=PPP2R5A">https://www.genecards.org/cgi-bin/carddisp.pl?gene=PPP2R5A</a> |
| C5orf64 | Chromosome 5 Putative Open Reading Frame 64      | RNA Gene       | 28 | GC05P061640 | 0.998033 | <a href="https://www.genecards.org/cgi-bin/carddisp.pl?gene=C5orf64">https://www.genecards.org/cgi-bin/carddisp.pl?gene=C5orf64</a> |
| SMIM23  | Small Integral Membrane Protein 23               | Protein Coding | 22 | GC05P171785 | 0.998033 | <a href="https://www.genecards.org/cgi-bin/carddisp.pl?gene=SMIM23">https://www.genecards.org/cgi-bin/carddisp.pl?gene=SMIM23</a>   |
| TRIB1   | Tribbles Pseudokinase 1                          | Protein Coding | 38 | GC08P125430 | 0.993718 | <a href="https://www.genecards.org/cgi-bin/carddisp.pl?gene=TRIB1">https://www.genecards.org/cgi-bin/carddisp.pl?gene=TRIB1</a>     |
| TRIB2   | Tribbles Pseudokinase 2                          | Protein Coding | 37 | GC02P012717 | 0.993718 | <a href="https://www.genecards.org/cgi-bin/carddisp.pl?gene=TRIB2">https://www.genecards.org/cgi-bin/carddisp.pl?gene=TRIB2</a>     |
| STK32B  | Serine/Threonine Kinase 32B                      | Protein Coding | 32 | GC04P005020 | 0.988998 | <a href="https://www.genecards.org/cgi-bin/carddisp.pl?gene=STK32B">https://www.genecards.org/cgi-bin/carddisp.pl?gene=STK32B</a>   |
| PHB1    | Prohibitin 1                                     | Protein Coding | 36 | GC17M049406 | 0.986121 | <a href="https://www.genecards.org/cgi-bin/carddisp.pl?gene=PHB1">https://www.genecards.org/cgi-bin/carddisp.pl?gene=PHB1</a>       |
| JAG1    | Jagged Canonical Notch Ligand 1                  | Protein Coding | 48 | GC20M010637 | 0.982082 | <a href="https://www.genecards.org/cgi-bin/carddisp.pl?gene=JAG1">https://www.genecards.org/cgi-bin/carddisp.pl?gene=JAG1</a>       |
| KAT5    | Lysine Acetyltransferase 5                       | Protein Coding | 46 | GC11P065711 | 0.982082 | <a href="https://www.genecards.org/cgi-bin/carddisp.pl?gene=KAT5">https://www.genecards.org/cgi-bin/carddisp.pl?gene=KAT5</a>       |
| INSR    | Insulin Receptor                                 | Protein Coding | 51 | GC19M007112 | 0.980465 | <a href="https://www.genecards.org/cgi-bin/carddisp.pl?gene=INSR">https://www.genecards.org/cgi-bin/carddisp.pl?gene=INSR</a>       |
| FSHR    | Follicle Stimulating Hormone Receptor            | Protein Coding | 46 | GC02M048962 | 0.978965 | <a href="https://www.genecards.org/cgi-bin/carddisp.pl?gene=FSHR">https://www.genecards.org/cgi-bin/carddisp.pl?gene=FSHR</a>       |
| CDKN1B  | Cyclin Dependent Kinase Inhibitor 1B             | Protein Coding | 45 | GC12P021339 | 0.978965 | <a href="https://www.genecards.org/cgi-bin/carddisp.pl?gene=CDKN1B">https://www.genecards.org/cgi-bin/carddisp.pl?gene=CDKN1B</a>   |

|         |                                                                                                   |                |    |             |          |                                                                                                                                            |
|---------|---------------------------------------------------------------------------------------------------|----------------|----|-------------|----------|--------------------------------------------------------------------------------------------------------------------------------------------|
|         |                                                                                                   |                |    |             |          | <a href="http://www.ncbi.nlm.nih.gov/ncbi/cdd/bin/carddisp.pl?gene=CDKN1B">bin/carddisp.pl?gene=CDKN1B</a>                                 |
| ADAMTS3 | ADAM Metallopeptidase With Thrombospondin Type 1 Motif 3                                          | Protein Coding | 41 | GC04M072280 | 0.978965 | <a href="http://www.ncbi.nlm.nih.gov/ncbi/cdd/bin/carddisp.pl?gene=ADAMTS3">https://www.genecards.org/cgi-bin/carddisp.pl?gene=ADAMTS3</a> |
| SUCLG2  | Succinate-CoA Ligase GDP-Forming Subunit Beta                                                     | Protein Coding | 40 | GC03M067358 | 0.978965 | <a href="http://www.ncbi.nlm.nih.gov/ncbi/cdd/bin/carddisp.pl?gene=SUCLG2">https://www.genecards.org/cgi-bin/carddisp.pl?gene=SUCLG2</a>   |
| ABL1    | ABL Proto-Oncogene 1, Non-Receptor Tyrosine Kinase                                                | Protein Coding | 50 | GC09P130713 | 0.969663 | <a href="http://www.ncbi.nlm.nih.gov/ncbi/cdd/bin/carddisp.pl?gene=ABL1">https://www.genecards.org/cgi-bin/carddisp.pl?gene=ABL1</a>       |
| ZNF300  | Zinc Finger Protein 300                                                                           | Protein Coding | 36 | GC05M150894 | 0.967315 | <a href="http://www.ncbi.nlm.nih.gov/ncbi/cdd/bin/carddisp.pl?gene=ZNF300">https://www.genecards.org/cgi-bin/carddisp.pl?gene=ZNF300</a>   |
| SMARCA4 | SWI/SNF Related, Matrix Associated, Actin Dependent Regulator Of Chromatin, Subfamily A, Member 4 | Protein Coding | 48 | GC19P010932 | 0.963885 | <a href="http://www.ncbi.nlm.nih.gov/ncbi/cdd/bin/carddisp.pl?gene=SMARCA4">https://www.genecards.org/cgi-bin/carddisp.pl?gene=SMARCA4</a> |
| ARHGEF1 | Rho Guanine Nucleotide Exchange Factor 1                                                          | Protein Coding | 44 | GC19P041883 | 0.963885 | <a href="http://www.ncbi.nlm.nih.gov/ncbi/cdd/bin/carddisp.pl?gene=ARHGEF1">https://www.genecards.org/cgi-bin/carddisp.pl?gene=ARHGEF1</a> |
| PTPRK   | Protein Tyrosine Phosphatase Receptor Type K                                                      | Protein Coding | 44 | GC06M127949 | 0.963885 | <a href="http://www.ncbi.nlm.nih.gov/ncbi/cdd/bin/carddisp.pl?gene=PTPRK">https://www.genecards.org/cgi-bin/carddisp.pl?gene=PTPRK</a>     |
| PARG    | Poly(ADP-Ribose) Glycohydrolase                                                                   | Protein Coding | 40 | GC10M049818 | 0.963885 | <a href="http://www.ncbi.nlm.nih.gov/ncbi/cdd/bin/carddisp.pl?gene=PARG">https://www.genecards.org/cgi-bin/carddisp.pl?gene=PARG</a>       |
| CCN5    | Cellular Communication Network Factor 5                                                           | Protein Coding | 29 | GC20P044715 | 0.963885 | <a href="http://www.ncbi.nlm.nih.gov/ncbi/cdd/bin/carddisp.pl?gene=CCN5">https://www.genecards.org/cgi-bin/carddisp.pl?gene=CCN5</a>       |
| MIR19B1 | MicroRNA 19b-1                                                                                    | RNA Gene       | 18 | GC13P091551 | 0.963885 | <a href="http://www.ncbi.nlm.nih.gov/ncbi/cdd/bin/carddisp.pl?gene=MIR19B1">https://www.genecards.org/cgi-bin/carddisp.pl?gene=MIR19B1</a> |
| MIR19B2 | MicroRNA 19b-2                                                                                    | RNA Gene       | 16 | GC0XM134310 | 0.963885 | <a href="http://www.ncbi.nlm.nih.gov/ncbi/cdd/bin/carddisp.pl?gene=MIR19B2">https://www.genecards.org/cgi-bin/carddisp.pl?gene=MIR19B2</a> |
| PRKG1   | Protein Kinase CGMP-Dependent 1                                                                   | Protein Coding | 48 | GC10P050991 | 0.962127 | <a href="http://www.ncbi.nlm.nih.gov/ncbi/cdd/bin/carddisp.pl?gene=PRKG1">https://www.genecards.org/cgi-bin/carddisp.pl?gene=PRKG1</a>     |
| EBP     | EBP Cholesterol Delta-Isomerase                                                                   | Protein Coding | 42 | GC0XP048521 | 0.958073 | <a href="http://www.ncbi.nlm.nih.gov/ncbi/cdd/bin/carddisp.pl?gene=EBP">https://www.genecards.org/cgi-</a>                                 |



|         |                                                                       |                |    |             |          |                                                                                                                                            |
|---------|-----------------------------------------------------------------------|----------------|----|-------------|----------|--------------------------------------------------------------------------------------------------------------------------------------------|
|         |                                                                       |                |    |             |          | <a href="http://www.ncbi.nlm.nih.gov/ncbi/cdd/bin/carddisp.pl?gene=EBP">bin/carddisp.pl?gene=EBP</a>                                       |
| EFS     | Embryonal Fyn-Associated Substrate                                    | Protein Coding | 35 | GC14M023356 | 0.957583 | <a href="http://www.ncbi.nlm.nih.gov/ncbi/cdd/bin/carddisp.pl?gene=EFS">https://www.genecards.org/cgi-bin/carddisp.pl?gene=EFS</a>         |
| PIK3CB  | Phosphatidylinositol-4,5-Bisphosphate 3-Kinase Catalytic Subunit Beta | Protein Coding | 46 | GC03M138652 | 0.957089 | <a href="http://www.ncbi.nlm.nih.gov/ncbi/cdd/bin/carddisp.pl?gene=PIK3CB">https://www.genecards.org/cgi-bin/carddisp.pl?gene=PIK3CB</a>   |
| UBE2N   | Ubiquitin Conjugating Enzyme E2 N                                     | Protein Coding | 45 | GC12M093406 | 0.956232 | <a href="http://www.ncbi.nlm.nih.gov/ncbi/cdd/bin/carddisp.pl?gene=UBE2N">https://www.genecards.org/cgi-bin/carddisp.pl?gene=UBE2N</a>     |
| DDB1    | Damage Specific DNA Binding Protein 1                                 | Protein Coding | 43 | GC11M089571 | 0.956232 | <a href="http://www.ncbi.nlm.nih.gov/ncbi/cdd/bin/carddisp.pl?gene=DDB1">https://www.genecards.org/cgi-bin/carddisp.pl?gene=DDB1</a>       |
| MIR499B | MicroRNA 499b                                                         | RNA Gene       | 10 | GC20M034990 | 0.952944 | <a href="http://www.ncbi.nlm.nih.gov/ncbi/cdd/bin/carddisp.pl?gene=MIR499B">https://www.genecards.org/cgi-bin/carddisp.pl?gene=MIR499B</a> |
| KCNA3   | Potassium Voltage-Gated Channel Subfamily A Member 3                  | Protein Coding | 43 | GC01M110654 | 0.949855 | <a href="http://www.ncbi.nlm.nih.gov/ncbi/cdd/bin/carddisp.pl?gene=KCNA3">https://www.genecards.org/cgi-bin/carddisp.pl?gene=KCNA3</a>     |
| G6PD    | Glucose-6-Phosphate Dehydrogenase                                     | Protein Coding | 48 | GC0XM154551 | 0.947585 | <a href="http://www.ncbi.nlm.nih.gov/ncbi/cdd/bin/carddisp.pl?gene=G6PD">https://www.genecards.org/cgi-bin/carddisp.pl?gene=G6PD</a>       |
| CADM1   | Cell Adhesion Molecule 1                                              | Protein Coding | 42 | GC11M115169 | 0.942037 | <a href="http://www.ncbi.nlm.nih.gov/ncbi/cdd/bin/carddisp.pl?gene=CADM1">https://www.genecards.org/cgi-bin/carddisp.pl?gene=CADM1</a>     |
| SAGE1   | Sarcoma Antigen 1                                                     | Protein Coding | 29 | GC0XP135889 | 0.942037 | <a href="http://www.ncbi.nlm.nih.gov/ncbi/cdd/bin/carddisp.pl?gene=SAGE1">https://www.genecards.org/cgi-bin/carddisp.pl?gene=SAGE1</a>     |
| IGHG3   | Immunoglobulin Heavy Constant Gamma 3 (G3m Marker)                    | Protein Coding | 29 | GC14M112714 | 0.938649 | <a href="http://www.ncbi.nlm.nih.gov/ncbi/cdd/bin/carddisp.pl?gene=IGHG3">https://www.genecards.org/cgi-bin/carddisp.pl?gene=IGHG3</a>     |
| PTGIR   | Prostaglandin I2 Receptor                                             | Protein Coding | 45 | GC19M065976 | 0.938271 | <a href="http://www.ncbi.nlm.nih.gov/ncbi/cdd/bin/carddisp.pl?gene=PTGIR">https://www.genecards.org/cgi-bin/carddisp.pl?gene=PTGIR</a>     |
| RYR2    | Ryanodine Receptor 2                                                  | Protein Coding | 46 | GC01P237042 | 0.935749 | <a href="http://www.ncbi.nlm.nih.gov/ncbi/cdd/bin/carddisp.pl?gene=RYR2">https://www.genecards.org/cgi-bin/carddisp.pl?gene=RYR2</a>       |
| HUNK    | Hormonally Up-Regulated Neu-Associated Kinase                         | Protein Coding | 36 | GC21P031873 | 0.935749 | <a href="http://www.ncbi.nlm.nih.gov/ncbi/cdd/bin/carddisp.pl?gene=HUNK">https://www.genecards.org/cgi-bin/carddisp.pl?gene=HUNK</a>       |

|         |                                                |                |    |             |          |                                                                                                                                     |
|---------|------------------------------------------------|----------------|----|-------------|----------|-------------------------------------------------------------------------------------------------------------------------------------|
| CYP51A1 | Cytochrome P450 Family 51 Subfamily A Member 1 | Protein Coding | 42 | GC07M092112 | 0.933388 | <a href="https://www.genecards.org/cgi-bin/carddisp.pl?gene=CYP51A1">https://www.genecards.org/cgi-bin/carddisp.pl?gene=CYP51A1</a> |
| CNN1    | Calponin 1                                     | Protein Coding | 39 | GC19P011539 | 0.933388 | <a href="https://www.genecards.org/cgi-bin/carddisp.pl?gene=CNN1">https://www.genecards.org/cgi-bin/carddisp.pl?gene=CNN1</a>       |
| SRSF6   | Serine And Arginine Rich Splicing Factor 6     | Protein Coding | 38 | GC20P043457 | 0.92952  | <a href="https://www.genecards.org/cgi-bin/carddisp.pl?gene=SRSF6">https://www.genecards.org/cgi-bin/carddisp.pl?gene=SRSF6</a>     |
| SIRPA   | Signal Regulatory Protein Alpha                | Protein Coding | 42 | GC20P001894 | 0.928178 | <a href="https://www.genecards.org/cgi-bin/carddisp.pl?gene=SIRPA">https://www.genecards.org/cgi-bin/carddisp.pl?gene=SIRPA</a>     |
| NR5A1   | Nuclear Receptor Subfamily 5 Group A Member 1  | Protein Coding | 48 | GC09M124481 | 0.923375 | <a href="https://www.genecards.org/cgi-bin/carddisp.pl?gene=NR5A1">https://www.genecards.org/cgi-bin/carddisp.pl?gene=NR5A1</a>     |
| MIR200C | MicroRNA 200c                                  | RNA Gene       | 21 | GC12P021094 | 0.922258 | <a href="https://www.genecards.org/cgi-bin/carddisp.pl?gene=MIR200C">https://www.genecards.org/cgi-bin/carddisp.pl?gene=MIR200C</a> |
| CYSLTR1 | Cysteinyl Leukotriene Receptor 1               | Protein Coding | 41 | GC0XM078271 | 0.919425 | <a href="https://www.genecards.org/cgi-bin/carddisp.pl?gene=CYSLTR1">https://www.genecards.org/cgi-bin/carddisp.pl?gene=CYSLTR1</a> |
| COMMD1  | Copper Metabolism Domain Containing 1          | Protein Coding | 41 | GC02P061888 | 0.918814 | <a href="https://www.genecards.org/cgi-bin/carddisp.pl?gene=COMMD1">https://www.genecards.org/cgi-bin/carddisp.pl?gene=COMMD1</a>   |
| WNT3A   | Wnt Family Member 3A                           | Protein Coding | 45 | GC01P229293 | 0.916329 | <a href="https://www.genecards.org/cgi-bin/carddisp.pl?gene=WNT3A">https://www.genecards.org/cgi-bin/carddisp.pl?gene=WNT3A</a>     |
| GAD1    | Glutamate Decarboxylase 1                      | Protein Coding | 48 | GC02P170813 | 0.916112 | <a href="https://www.genecards.org/cgi-bin/carddisp.pl?gene=GAD1">https://www.genecards.org/cgi-bin/carddisp.pl?gene=GAD1</a>       |
| SLC22A2 | Solute Carrier Family 22 Member 2              | Protein Coding | 44 | GC06M160190 | 0.90956  | <a href="https://www.genecards.org/cgi-bin/carddisp.pl?gene=SLC22A2">https://www.genecards.org/cgi-bin/carddisp.pl?gene=SLC22A2</a> |
| DBP     | D-Box Binding PAR BZIP Transcription Factor    | Protein Coding | 37 | GC19M048630 | 0.907883 | <a href="https://www.genecards.org/cgi-bin/carddisp.pl?gene=DBP">https://www.genecards.org/cgi-bin/carddisp.pl?gene=DBP</a>         |
| MAZ     | MYC Associated Zinc Finger Protein             | Protein Coding | 39 | GC16P029806 | 0.905957 | <a href="https://www.genecards.org/cgi-bin/carddisp.pl?gene=MAZ">https://www.genecards.org/cgi-bin/carddisp.pl?gene=MAZ</a>         |
| ADPRH   | ADP-Ribosylarginine Hydrolase                  | Protein Coding | 34 | GC03P119579 | 0.90055  | <a href="https://www.genecards.org/cgi-">https://www.genecards.org/cgi-</a>                                                         |

|         |                                                          |                |    |             |          |                                                                                                                                     |
|---------|----------------------------------------------------------|----------------|----|-------------|----------|-------------------------------------------------------------------------------------------------------------------------------------|
|         |                                                          |                |    |             |          | <a href="#">bin/carddisp.pl?gene=ADPRH</a>                                                                                          |
| TP53BP1 | Tumor Protein P53 Binding Protein 1                      | Protein Coding | 42 | GC15M043403 | 0.895364 | <a href="https://www.genecards.org/cgi-bin/carddisp.pl?gene=TP53BP1">https://www.genecards.org/cgi-bin/carddisp.pl?gene=TP53BP1</a> |
| TRAF4   | TNF Receptor Associated Factor 4                         | Protein Coding | 41 | GC17P054910 | 0.894301 | <a href="https://www.genecards.org/cgi-bin/carddisp.pl?gene=TRAF4">https://www.genecards.org/cgi-bin/carddisp.pl?gene=TRAF4</a>     |
| SMOC2   | SPARC Related Modular Calcium Binding 2                  | Protein Coding | 42 | GC06P168441 | 0.893829 | <a href="https://www.genecards.org/cgi-bin/carddisp.pl?gene=SMOC2">https://www.genecards.org/cgi-bin/carddisp.pl?gene=SMOC2</a>     |
| UBC     | Ubiquitin C                                              | Protein Coding | 41 | GC12M124911 | 0.893829 | <a href="https://www.genecards.org/cgi-bin/carddisp.pl?gene=UBC">https://www.genecards.org/cgi-bin/carddisp.pl?gene=UBC</a>         |
| ATP8B1  | ATPase Phospholipid Transporting 8B1                     | Protein Coding | 40 | GC18M057646 | 0.893829 | <a href="https://www.genecards.org/cgi-bin/carddisp.pl?gene=ATP8B1">https://www.genecards.org/cgi-bin/carddisp.pl?gene=ATP8B1</a>   |
| FMN2    | Formin 2                                                 | Protein Coding | 38 | GC01P240014 | 0.893829 | <a href="https://www.genecards.org/cgi-bin/carddisp.pl?gene=FMN2">https://www.genecards.org/cgi-bin/carddisp.pl?gene=FMN2</a>       |
| KCNK12  | Potassium Two Pore Domain Channel Subfamily K Member 12  | Protein Coding | 38 | GC02M047516 | 0.893829 | <a href="https://www.genecards.org/cgi-bin/carddisp.pl?gene=KCNK12">https://www.genecards.org/cgi-bin/carddisp.pl?gene=KCNK12</a>   |
| ZP4     | Zona Pellucida Glycoprotein 4                            | Protein Coding | 32 | GC01M237877 | 0.893829 | <a href="https://www.genecards.org/cgi-bin/carddisp.pl?gene=ZP4">https://www.genecards.org/cgi-bin/carddisp.pl?gene=ZP4</a>         |
| SREBF1  | Sterol Regulatory Element Binding Transcription Factor 1 | Protein Coding | 44 | GC17M017810 | 0.891944 | <a href="https://www.genecards.org/cgi-bin/carddisp.pl?gene=SREBF1">https://www.genecards.org/cgi-bin/carddisp.pl?gene=SREBF1</a>   |
| CXCL14  | C-X-C Motif Chemokine Ligand 14                          | Protein Coding | 36 | GC05M135617 | 0.890761 | <a href="https://www.genecards.org/cgi-bin/carddisp.pl?gene=CXCL14">https://www.genecards.org/cgi-bin/carddisp.pl?gene=CXCL14</a>   |
| ACE2    | Angiotensin Converting Enzyme 2                          | Protein Coding | 46 | GC0XM015494 | 0.884451 | <a href="https://www.genecards.org/cgi-bin/carddisp.pl?gene=ACE2">https://www.genecards.org/cgi-bin/carddisp.pl?gene=ACE2</a>       |
| EPX     | Eosinophil Peroxidase                                    | Protein Coding | 43 | GC17P058192 | 0.883289 | <a href="https://www.genecards.org/cgi-bin/carddisp.pl?gene=EPX">https://www.genecards.org/cgi-bin/carddisp.pl?gene=EPX</a>         |
| PNPLA6  | Patatin Like Phospholipase Domain Containing 6           | Protein Coding | 43 | GC19P007534 | 0.883289 | <a href="https://www.genecards.org/cgi-bin/carddisp.pl?gene=PNPLA6">https://www.genecards.org/cgi-bin/carddisp.pl?gene=PNPLA6</a>   |

|         |                                                |                |    |             |          |                                                                                                                                     |
|---------|------------------------------------------------|----------------|----|-------------|----------|-------------------------------------------------------------------------------------------------------------------------------------|
| FARSB   | Phenylalanyl-TRNA Synthetase Subunit Beta      | Protein Coding | 42 | GC02M222570 | 0.883289 | <a href="https://www.genecards.org/cgi-bin/carddisp.pl?gene=FARSB">https://www.genecards.org/cgi-bin/carddisp.pl?gene=FARSB</a>     |
| TOLLIP  | Toll Interacting Protein                       | Protein Coding | 42 | GC11M001274 | 0.883289 | <a href="https://www.genecards.org/cgi-bin/carddisp.pl?gene=TOLLIP">https://www.genecards.org/cgi-bin/carddisp.pl?gene=TOLLIP</a>   |
| PSIP1   | PC4 And SFRS1 Interacting Protein 1            | Protein Coding | 38 | GC09M015464 | 0.883289 | <a href="https://www.genecards.org/cgi-bin/carddisp.pl?gene=PSIP1">https://www.genecards.org/cgi-bin/carddisp.pl?gene=PSIP1</a>     |
| FOXP2   | Forkhead Box P2                                | Protein Coding | 43 | GC07P114086 | 0.882679 | <a href="https://www.genecards.org/cgi-bin/carddisp.pl?gene=FOXP2">https://www.genecards.org/cgi-bin/carddisp.pl?gene=FOXP2</a>     |
| EMD     | Emerin                                         | Protein Coding | 42 | GC0XP154379 | 0.882679 | <a href="https://www.genecards.org/cgi-bin/carddisp.pl?gene=EMD">https://www.genecards.org/cgi-bin/carddisp.pl?gene=EMD</a>         |
| MUC5AC  | Mucin 5AC, Oligomeric Mucus/Gel-Forming        | Protein Coding | 40 | GC11P001810 | 0.880126 | <a href="https://www.genecards.org/cgi-bin/carddisp.pl?gene=MUC5AC">https://www.genecards.org/cgi-bin/carddisp.pl?gene=MUC5AC</a>   |
| ILK     | Integrin Linked Kinase                         | Protein Coding | 44 | GC11P006604 | 0.876646 | <a href="https://www.genecards.org/cgi-bin/carddisp.pl?gene=ILK">https://www.genecards.org/cgi-bin/carddisp.pl?gene=ILK</a>         |
| P4HTM   | Prolyl 4-Hydroxylase, Transmembrane            | Protein Coding | 36 | GC03P049627 | 0.876646 | <a href="https://www.genecards.org/cgi-bin/carddisp.pl?gene=P4HTM">https://www.genecards.org/cgi-bin/carddisp.pl?gene=P4HTM</a>     |
| FUT7    | Fucosyltransferase 7                           | Protein Coding | 40 | GC09M137030 | 0.866573 | <a href="https://www.genecards.org/cgi-bin/carddisp.pl?gene=FUT7">https://www.genecards.org/cgi-bin/carddisp.pl?gene=FUT7</a>       |
| DUSP7   | Dual Specificity Phosphatase 7                 | Protein Coding | 38 | GC03M052048 | 0.865589 | <a href="https://www.genecards.org/cgi-bin/carddisp.pl?gene=DUSP7">https://www.genecards.org/cgi-bin/carddisp.pl?gene=DUSP7</a>     |
| CYP24A1 | Cytochrome P450 Family 24 Subfamily A Member 1 | Protein Coding | 45 | GC20M054153 | 0.855808 | <a href="https://www.genecards.org/cgi-bin/carddisp.pl?gene=CYP24A1">https://www.genecards.org/cgi-bin/carddisp.pl?gene=CYP24A1</a> |
| NR3C2   | Nuclear Receptor Subfamily 3 Group C Member 2  | Protein Coding | 45 | GC04M148078 | 0.855808 | <a href="https://www.genecards.org/cgi-bin/carddisp.pl?gene=NR3C2">https://www.genecards.org/cgi-bin/carddisp.pl?gene=NR3C2</a>     |
| SRD5A1  | Steroid 5 Alpha-Reductase 1                    | Protein Coding | 42 | GC05P006633 | 0.855808 | <a href="https://www.genecards.org/cgi-bin/carddisp.pl?gene=SRD5A1">https://www.genecards.org/cgi-bin/carddisp.pl?gene=SRD5A1</a>   |
| VAV3    | Vav Guanine Nucleotide Exchange Factor 3       | Protein Coding | 42 | GC01M107571 | 0.855808 | <a href="https://www.genecards.org/cgi-bin/carddisp.pl?gene=VAV3">https://www.genecards.org/cgi-bin/carddisp.pl?gene=VAV3</a>       |

|          |                                                                |                |    |             |          |                                                                                                                                              |
|----------|----------------------------------------------------------------|----------------|----|-------------|----------|----------------------------------------------------------------------------------------------------------------------------------------------|
|          |                                                                |                |    |             |          | <a href="http://www.ncbi.nlm.nih.gov/ncbi/cdd/bin/carddisp.pl?gene=VAV3">bin/carddisp.pl?gene=VAV3</a>                                       |
| TBXT     | T-Box Transcription Factor T                                   | Protein Coding | 33 | GC06M166158 | 0.851548 | <a href="http://www.ncbi.nlm.nih.gov/ncbi/cdd/bin/carddisp.pl?gene=TBXT">https://www.genecards.org/cgi-bin/carddisp.pl?gene=TBXT</a>         |
| PADI1    | Peptidyl Arginine Deiminase 1                                  | Protein Coding | 37 | GC01P017205 | 0.850721 | <a href="http://www.ncbi.nlm.nih.gov/ncbi/cdd/bin/carddisp.pl?gene=PADI1">https://www.genecards.org/cgi-bin/carddisp.pl?gene=PADI1</a>       |
| PRKRA    | Protein Activator Of Interferon Induced Protein Kinase EIF2AK2 | Protein Coding | 40 | GC02M178431 | 0.848315 | <a href="http://www.ncbi.nlm.nih.gov/ncbi/cdd/bin/carddisp.pl?gene=PRKRA">https://www.genecards.org/cgi-bin/carddisp.pl?gene=PRKRA</a>       |
| CA1      | Carbonic Anhydrase 1                                           | Protein Coding | 46 | GC08M085327 | 0.846249 | <a href="http://www.ncbi.nlm.nih.gov/ncbi/cdd/bin/carddisp.pl?gene=CA1">https://www.genecards.org/cgi-bin/carddisp.pl?gene=CA1</a>           |
| SERPING1 | Serpin Family G Member 1                                       | Protein Coding | 45 | GC11P057597 | 0.846249 | <a href="http://www.ncbi.nlm.nih.gov/ncbi/cdd/bin/carddisp.pl?gene=SERPING1">https://www.genecards.org/cgi-bin/carddisp.pl?gene=SERPING1</a> |
| COTL1    | Coactosin Like F-Actin Binding Protein 1                       | Protein Coding | 40 | GC16M084566 | 0.842726 | <a href="http://www.ncbi.nlm.nih.gov/ncbi/cdd/bin/carddisp.pl?gene=COTL1">https://www.genecards.org/cgi-bin/carddisp.pl?gene=COTL1</a>       |
| CORT     | Cortistatin                                                    | Protein Coding | 35 | GC01P010508 | 0.837322 | <a href="http://www.ncbi.nlm.nih.gov/ncbi/cdd/bin/carddisp.pl?gene=CORT">https://www.genecards.org/cgi-bin/carddisp.pl?gene=CORT</a>         |
| GCGR     | Glucagon Receptor                                              | Protein Coding | 45 | GC17P081804 | 0.836011 | <a href="http://www.ncbi.nlm.nih.gov/ncbi/cdd/bin/carddisp.pl?gene=GCGR">https://www.genecards.org/cgi-bin/carddisp.pl?gene=GCGR</a>         |
| TXNRD2   | Thioredoxin Reductase 2                                        | Protein Coding | 45 | GC22M019863 | 0.835236 | <a href="http://www.ncbi.nlm.nih.gov/ncbi/cdd/bin/carddisp.pl?gene=TXNRD2">https://www.genecards.org/cgi-bin/carddisp.pl?gene=TXNRD2</a>     |
| CDR1     | Cerebellar Degeneration Related Protein 1                      | Protein Coding | 32 | GC0XM140782 | 0.835019 | <a href="http://www.ncbi.nlm.nih.gov/ncbi/cdd/bin/carddisp.pl?gene=CDR1">https://www.genecards.org/cgi-bin/carddisp.pl?gene=CDR1</a>         |
| CARD11   | Caspase Recruitment Domain Family Member 11                    | Protein Coding | 45 | GC07M002906 | 0.828873 | <a href="http://www.ncbi.nlm.nih.gov/ncbi/cdd/bin/carddisp.pl?gene=CARD11">https://www.genecards.org/cgi-bin/carddisp.pl?gene=CARD11</a>     |
| CPE      | Carboxypeptidase E                                             | Protein Coding | 44 | GC04P165361 | 0.828873 | <a href="http://www.ncbi.nlm.nih.gov/ncbi/cdd/bin/carddisp.pl?gene=CPE">https://www.genecards.org/cgi-bin/carddisp.pl?gene=CPE</a>           |
| PDE5A    | Phosphodiesterase 5A                                           | Protein Coding | 44 | GC04M119494 | 0.828873 | <a href="http://www.ncbi.nlm.nih.gov/ncbi/cdd/bin/carddisp.pl?gene=PDE5A">https://www.genecards.org/cgi-bin/carddisp.pl?gene=PDE5A</a>       |

|        |                                           |                |    |             |          |                                                                                                                                   |
|--------|-------------------------------------------|----------------|----|-------------|----------|-----------------------------------------------------------------------------------------------------------------------------------|
| APOA2  | Apolipoprotein A2                         | Protein Coding | 43 | GC01M161222 | 0.828873 | <a href="https://www.genecards.org/cgi-bin/carddisp.pl?gene=APOA2">https://www.genecards.org/cgi-bin/carddisp.pl?gene=APOA2</a>   |
| IL31RA | Interleukin 31 Receptor A                 | Protein Coding | 42 | GC05P055840 | 0.828873 | <a href="https://www.genecards.org/cgi-bin/carddisp.pl?gene=IL31RA">https://www.genecards.org/cgi-bin/carddisp.pl?gene=IL31RA</a> |
| INSL3  | Insulin Like 3                            | Protein Coding | 39 | GC19M017816 | 0.828873 | <a href="https://www.genecards.org/cgi-bin/carddisp.pl?gene=INSL3">https://www.genecards.org/cgi-bin/carddisp.pl?gene=INSL3</a>   |
| PHF11  | PHD Finger Protein 11                     | Protein Coding | 35 | GC13P049495 | 0.828873 | <a href="https://www.genecards.org/cgi-bin/carddisp.pl?gene=PHF11">https://www.genecards.org/cgi-bin/carddisp.pl?gene=PHF11</a>   |
| TMEM79 | Transmembrane Protein 79                  | Protein Coding | 34 | GC01P156252 | 0.828873 | <a href="https://www.genecards.org/cgi-bin/carddisp.pl?gene=TMEM79">https://www.genecards.org/cgi-bin/carddisp.pl?gene=TMEM79</a> |
| SLC1A1 | Solute Carrier Family 1 Member 1          | Protein Coding | 47 | GC09P004490 | 0.828172 | <a href="https://www.genecards.org/cgi-bin/carddisp.pl?gene=SLC1A1">https://www.genecards.org/cgi-bin/carddisp.pl?gene=SLC1A1</a> |
| ARG2   | Arginase 2                                | Protein Coding | 43 | GC14P067619 | 0.828172 | <a href="https://www.genecards.org/cgi-bin/carddisp.pl?gene=ARG2">https://www.genecards.org/cgi-bin/carddisp.pl?gene=ARG2</a>     |
| SH3BP2 | SH3 Domain Binding Protein 2              | Protein Coding | 40 | GC04P002794 | 0.828172 | <a href="https://www.genecards.org/cgi-bin/carddisp.pl?gene=SH3BP2">https://www.genecards.org/cgi-bin/carddisp.pl?gene=SH3BP2</a> |
| MAPK11 | Mitogen-Activated Protein Kinase 11       | Protein Coding | 45 | GC22M050263 | 0.817537 | <a href="https://www.genecards.org/cgi-bin/carddisp.pl?gene=MAPK11">https://www.genecards.org/cgi-bin/carddisp.pl?gene=MAPK11</a> |
| MAPK12 | Mitogen-Activated Protein Kinase 12       | Protein Coding | 45 | GC22M057729 | 0.817537 | <a href="https://www.genecards.org/cgi-bin/carddisp.pl?gene=MAPK12">https://www.genecards.org/cgi-bin/carddisp.pl?gene=MAPK12</a> |
| HNRNPD | Heterogeneous Nuclear Ribonucleoprotein D | Protein Coding | 41 | GC04M082352 | 0.817537 | <a href="https://www.genecards.org/cgi-bin/carddisp.pl?gene=HNRNPD">https://www.genecards.org/cgi-bin/carddisp.pl?gene=HNRNPD</a> |
| SPPL2A | Signal Peptide Peptidase Like 2A          | Protein Coding | 40 | GC15M050702 | 0.800444 | <a href="https://www.genecards.org/cgi-bin/carddisp.pl?gene=SPPL2A">https://www.genecards.org/cgi-bin/carddisp.pl?gene=SPPL2A</a> |
| PSMC6  | Proteasome 26S Subunit, ATPase 6          | Protein Coding | 39 | GC14P052707 | 0.800444 | <a href="https://www.genecards.org/cgi-bin/carddisp.pl?gene=PSMC6">https://www.genecards.org/cgi-bin/carddisp.pl?gene=PSMC6</a>   |
| MAGI1  | Membrane Associated Guanylate Kinase, WW  | Protein Coding | 38 | GC03M065330 | 0.800444 | <a href="https://www.genecards.org/cgi-bin/carddisp.pl?gene=MAGI1">https://www.genecards.org/cgi-bin/carddisp.pl?gene=MAGI1</a>   |

|             |                                                             |                   |    |                 |              |                                                                                                                                          |
|-------------|-------------------------------------------------------------|-------------------|----|-----------------|--------------|------------------------------------------------------------------------------------------------------------------------------------------|
|             | And PDZ Domain<br>Containing 1                              |                   |    |                 |              | <a href="http://www.ncbi.nlm.nih.gov/ncbi/cdd/cdddisp.pl?gene=MAGI1">bin/cdddisp.pl?gene=MAGI1</a>                                       |
| ZNF395      | Zinc Finger Protein 395                                     | Protein<br>Coding | 32 | GC08M<br>028345 | 0.800<br>444 | <a href="http://www.ncbi.nlm.nih.gov/ncbi/cdd/cdddisp.pl?gene=ZNF395">https://www.ncbi.nlm.nih.gov/ncbi/cdd/cdddisp.pl?gene=ZNF395</a>   |
| NCSTN       | Nicastrin                                                   | Protein<br>Coding | 45 | GC01P<br>160343 | 0.799<br>1   | <a href="http://www.ncbi.nlm.nih.gov/ncbi/cdd/cdddisp.pl?gene=NCSTN">https://www.ncbi.nlm.nih.gov/ncbi/cdd/cdddisp.pl?gene=NCSTN</a>     |
| UGT2B1<br>7 | UDP<br>Glucuronosyltransferase<br>Family 2 Member B17       | Protein<br>Coding | 41 | GC04M<br>068537 | 0.799<br>1   | <a href="http://www.ncbi.nlm.nih.gov/ncbi/cdd/cdddisp.pl?gene=UGT2B17">https://www.ncbi.nlm.nih.gov/ncbi/cdd/cdddisp.pl?gene=UGT2B17</a> |
| TRIM5       | Tripartite Motif<br>Containing 5                            | Protein<br>Coding | 40 | GC11M<br>006531 | 0.799<br>1   | <a href="http://www.ncbi.nlm.nih.gov/ncbi/cdd/cdddisp.pl?gene=TRIM5">https://www.ncbi.nlm.nih.gov/ncbi/cdd/cdddisp.pl?gene=TRIM5</a>     |
| FIP1L1      | Factor Interacting With<br>PAPOLA And CPSF1                 | Protein<br>Coding | 39 | GC04P<br>053427 | 0.799<br>1   | <a href="http://www.ncbi.nlm.nih.gov/ncbi/cdd/cdddisp.pl?gene=FIP1L1">https://www.ncbi.nlm.nih.gov/ncbi/cdd/cdddisp.pl?gene=FIP1L1</a>   |
| SBDS        | SBDS Ribosome<br>Maturation Factor                          | Protein<br>Coding | 41 | GC07M<br>066987 | 0.792<br>955 | <a href="http://www.ncbi.nlm.nih.gov/ncbi/cdd/cdddisp.pl?gene=SBDS">https://www.ncbi.nlm.nih.gov/ncbi/cdd/cdddisp.pl?gene=SBDS</a>       |
| PTGDR2      | Prostaglandin D2 Receptor<br>2                              | Protein<br>Coding | 40 | GC11M<br>060850 | 0.792<br>955 | <a href="http://www.ncbi.nlm.nih.gov/ncbi/cdd/cdddisp.pl?gene=PTGDR2">https://www.ncbi.nlm.nih.gov/ncbi/cdd/cdddisp.pl?gene=PTGDR2</a>   |
| KRT9        | Keratin 9                                                   | Protein<br>Coding | 41 | GC17M<br>041565 | 0.792<br>552 | <a href="http://www.ncbi.nlm.nih.gov/ncbi/cdd/cdddisp.pl?gene=KRT9">https://www.ncbi.nlm.nih.gov/ncbi/cdd/cdddisp.pl?gene=KRT9</a>       |
| SLC9A3      | Solute Carrier Family 9<br>Member A3                        | Protein<br>Coding | 46 | GC05M<br>000472 | 0.789<br>809 | <a href="http://www.ncbi.nlm.nih.gov/ncbi/cdd/cdddisp.pl?gene=SLC9A3">https://www.ncbi.nlm.nih.gov/ncbi/cdd/cdddisp.pl?gene=SLC9A3</a>   |
| HMGCS2      | 3-Hydroxy-3-<br>Methylglutaryl-CoA<br>Synthase 2            | Protein<br>Coding | 45 | GC01M<br>119747 | 0.789<br>809 | <a href="http://www.ncbi.nlm.nih.gov/ncbi/cdd/cdddisp.pl?gene=HMGCS2">https://www.ncbi.nlm.nih.gov/ncbi/cdd/cdddisp.pl?gene=HMGCS2</a>   |
| PRCP        | Prolylcarboxypeptidase                                      | Protein<br>Coding | 45 | GC11M<br>090534 | 0.789<br>809 | <a href="http://www.ncbi.nlm.nih.gov/ncbi/cdd/cdddisp.pl?gene=PRCP">https://www.ncbi.nlm.nih.gov/ncbi/cdd/cdddisp.pl?gene=PRCP</a>       |
| ABCA7       | ATP Binding Cassette<br>Subfamily A Member 7                | Protein<br>Coding | 44 | GC19P<br>002825 | 0.789<br>809 | <a href="http://www.ncbi.nlm.nih.gov/ncbi/cdd/cdddisp.pl?gene=ABCA7">https://www.ncbi.nlm.nih.gov/ncbi/cdd/cdddisp.pl?gene=ABCA7</a>     |
| EFEMP2      | EGF Containing Fibulin<br>Extracellular Matrix<br>Protein 2 | Protein<br>Coding | 44 | GC11M<br>089827 | 0.789<br>809 | <a href="http://www.ncbi.nlm.nih.gov/ncbi/cdd/cdddisp.pl?gene=EFEMP2">https://www.ncbi.nlm.nih.gov/ncbi/cdd/cdddisp.pl?gene=EFEMP2</a>   |

|         |                                                                                      |                |    |             |          |                                                                                                                                     |
|---------|--------------------------------------------------------------------------------------|----------------|----|-------------|----------|-------------------------------------------------------------------------------------------------------------------------------------|
| NPPA    | Natriuretic Peptide A                                                                | Protein Coding | 44 | GC01M011846 | 0.789809 | <a href="https://www.genecards.org/cgi-bin/carddisp.pl?gene=NPPA">https://www.genecards.org/cgi-bin/carddisp.pl?gene=NPPA</a>       |
| S1PR3   | Sphingosine-1-Phosphate Receptor 3                                                   | Protein Coding | 43 | GC09P089316 | 0.789809 | <a href="https://www.genecards.org/cgi-bin/carddisp.pl?gene=S1PR3">https://www.genecards.org/cgi-bin/carddisp.pl?gene=S1PR3</a>     |
| PALB2   | Partner And Localizer Of BRCA2                                                       | Protein Coding | 42 | GC16M023603 | 0.789809 | <a href="https://www.genecards.org/cgi-bin/carddisp.pl?gene=PALB2">https://www.genecards.org/cgi-bin/carddisp.pl?gene=PALB2</a>     |
| PLSCR1  | Phospholipid Scramblase 1                                                            | Protein Coding | 42 | GC03M146515 | 0.789809 | <a href="https://www.genecards.org/cgi-bin/carddisp.pl?gene=PLSCR1">https://www.genecards.org/cgi-bin/carddisp.pl?gene=PLSCR1</a>   |
| S1PR2   | Sphingosine-1-Phosphate Receptor 2                                                   | Protein Coding | 42 | GC19M010223 | 0.789809 | <a href="https://www.genecards.org/cgi-bin/carddisp.pl?gene=S1PR2">https://www.genecards.org/cgi-bin/carddisp.pl?gene=S1PR2</a>     |
| NDUFAB1 | NADH:Ubiquinone Oxidoreductase Subunit AB1                                           | Protein Coding | 41 | GC16M023582 | 0.789809 | <a href="https://www.genecards.org/cgi-bin/carddisp.pl?gene=NDUFAB1">https://www.genecards.org/cgi-bin/carddisp.pl?gene=NDUFAB1</a> |
| BNIP3   | BCL2 Interacting Protein 3                                                           | Protein Coding | 40 | GC10M131966 | 0.789809 | <a href="https://www.genecards.org/cgi-bin/carddisp.pl?gene=BNIP3">https://www.genecards.org/cgi-bin/carddisp.pl?gene=BNIP3</a>     |
| CLEC1B  | C-Type Lectin Domain Family 1 Member B                                               | Protein Coding | 38 | GC12M021103 | 0.789809 | <a href="https://www.genecards.org/cgi-bin/carddisp.pl?gene=CLEC1B">https://www.genecards.org/cgi-bin/carddisp.pl?gene=CLEC1B</a>   |
| KIR2DL4 | Killer Cell Immunoglobulin Like Receptor, Two Ig Domains And Long Cytoplasmic Tail 4 | Protein Coding | 38 | GC19P067383 | 0.789809 | <a href="https://www.genecards.org/cgi-bin/carddisp.pl?gene=KIR2DL4">https://www.genecards.org/cgi-bin/carddisp.pl?gene=KIR2DL4</a> |
| SEZ6L   | Seizure Related 6 Homolog Like                                                       | Protein Coding | 38 | GC22P026169 | 0.789809 | <a href="https://www.genecards.org/cgi-bin/carddisp.pl?gene=SEZ6L">https://www.genecards.org/cgi-bin/carddisp.pl?gene=SEZ6L</a>     |
| ABLIM1  | Actin Binding LIM Protein 1                                                          | Protein Coding | 37 | GC10M114487 | 0.789809 | <a href="https://www.genecards.org/cgi-bin/carddisp.pl?gene=ABLIM1">https://www.genecards.org/cgi-bin/carddisp.pl?gene=ABLIM1</a>   |
| FBXO38  | F-Box Protein 38                                                                     | Protein Coding | 37 | GC05P148383 | 0.789809 | <a href="https://www.genecards.org/cgi-bin/carddisp.pl?gene=FBXO38">https://www.genecards.org/cgi-bin/carddisp.pl?gene=FBXO38</a>   |
| PSRC1   | Proline And Serine Rich Coiled-Coil 1                                                | Protein Coding | 37 | GC01M109279 | 0.789809 | <a href="https://www.genecards.org/cgi-bin/carddisp.pl?gene=PSRC1">https://www.genecards.org/cgi-bin/carddisp.pl?gene=PSRC1</a>     |



|         |                                                     |                |    |             |          |                                                                                                                                     |
|---------|-----------------------------------------------------|----------------|----|-------------|----------|-------------------------------------------------------------------------------------------------------------------------------------|
| DCTN5   | Dynactin Subunit 5                                  | Protein Coding | 36 | GC16P024282 | 0.789809 | <a href="https://www.genecards.org/cgi-bin/carddisp.pl?gene=DCTN5">https://www.genecards.org/cgi-bin/carddisp.pl?gene=DCTN5</a>     |
| LAIR2   | Leukocyte Associated Immunoglobulin Like Receptor 2 | Protein Coding | 36 | GC19P067370 | 0.789809 | <a href="https://www.genecards.org/cgi-bin/carddisp.pl?gene=LAIR2">https://www.genecards.org/cgi-bin/carddisp.pl?gene=LAIR2</a>     |
| ZFAND6  | Zinc Finger AN1-Type Containing 6                   | Protein Coding | 36 | GC15P117829 | 0.789809 | <a href="https://www.genecards.org/cgi-bin/carddisp.pl?gene=ZFAND6">https://www.genecards.org/cgi-bin/carddisp.pl?gene=ZFAND6</a>   |
| ZDHHC1  | Zinc Finger DHHC-Type Containing 1                  | Protein Coding | 35 | GC16M067394 | 0.789809 | <a href="https://www.genecards.org/cgi-bin/carddisp.pl?gene=ZDHHC1">https://www.genecards.org/cgi-bin/carddisp.pl?gene=ZDHHC1</a>   |
| ZGPAT   | Zinc Finger CCCH-Type And G-Patch Domain Containing | Protein Coding | 35 | GC20P063707 | 0.789809 | <a href="https://www.genecards.org/cgi-bin/carddisp.pl?gene=ZGPAT">https://www.genecards.org/cgi-bin/carddisp.pl?gene=ZGPAT</a>     |
| KLHDC1  | Kelch Domain Containing 1                           | Protein Coding | 34 | GC14P049693 | 0.789809 | <a href="https://www.genecards.org/cgi-bin/carddisp.pl?gene=KLHDC1">https://www.genecards.org/cgi-bin/carddisp.pl?gene=KLHDC1</a>   |
| NDST3   | N-Deacetylase And N-Sulfotransferase 3              | Protein Coding | 34 | GC04P118033 | 0.789809 | <a href="https://www.genecards.org/cgi-bin/carddisp.pl?gene=NDST3">https://www.genecards.org/cgi-bin/carddisp.pl?gene=NDST3</a>     |
| TRAFD1  | TRAF-Type Zinc Finger Domain Containing 1           | Protein Coding | 34 | GC12P112125 | 0.789809 | <a href="https://www.genecards.org/cgi-bin/carddisp.pl?gene=TRAFD1">https://www.genecards.org/cgi-bin/carddisp.pl?gene=TRAFD1</a>   |
| FAM135A | Family With Sequence Similarity 135 Member A        | Protein Coding | 33 | GC06P070412 | 0.789809 | <a href="https://www.genecards.org/cgi-bin/carddisp.pl?gene=FAM135A">https://www.genecards.org/cgi-bin/carddisp.pl?gene=FAM135A</a> |
| HIGD1C  | HIG1 Hypoxia Inducible Domain Family Member 1C      | Protein Coding | 28 | GC12P050932 | 0.789809 | <a href="https://www.genecards.org/cgi-bin/carddisp.pl?gene=HIGD1C">https://www.genecards.org/cgi-bin/carddisp.pl?gene=HIGD1C</a>   |
| SLC35F4 | Solute Carrier Family 35 Member F4                  | Protein Coding | 27 | GC14M057563 | 0.789809 | <a href="https://www.genecards.org/cgi-bin/carddisp.pl?gene=SLC35F4">https://www.genecards.org/cgi-bin/carddisp.pl?gene=SLC35F4</a> |
| C3AR1   | Complement C3a Receptor 1                           | Protein Coding | 41 | GC12M008058 | 0.783075 | <a href="https://www.genecards.org/cgi-bin/carddisp.pl?gene=C3AR1">https://www.genecards.org/cgi-bin/carddisp.pl?gene=C3AR1</a>     |
| SLC3A2  | Solute Carrier Family 3 Member 2                    | Protein Coding | 40 | GC11P062856 | 0.782247 | <a href="https://www.genecards.org/cgi-bin/carddisp.pl?gene=SLC3A2">https://www.genecards.org/cgi-bin/carddisp.pl?gene=SLC3A2</a>   |
| ITIH4   | Inter-Alpha-Trypsin Inhibitor Heavy Chain 4         | Protein Coding | 42 | GC03M052812 | 0.781451 | <a href="https://www.genecards.org/cgi-">https://www.genecards.org/cgi-</a>                                                         |

|                   |                                                                     |                |    |             |          |                                                                                                                                                     |
|-------------------|---------------------------------------------------------------------|----------------|----|-------------|----------|-----------------------------------------------------------------------------------------------------------------------------------------------------|
|                   |                                                                     |                |    |             |          | <a href="http://bin/carddisp.pl?gene=ITI4">bin/carddisp.pl?gene=ITI4</a>                                                                            |
| FABP5             | Fatty Acid Binding Protein 5                                        | Protein Coding | 41 | GC08P081282 | 0.77223  | <a href="https://www.genecards.org/cgi-bin/carddisp.pl?gene=FABP5">https://www.genecards.org/cgi-bin/carddisp.pl?gene=FABP5</a>                     |
| TNFSF12 - TNFSF13 | TNFSF12-TNFSF13 Readthrough                                         | Protein Coding | 23 | GC17P011168 | 0.769389 | <a href="https://www.genecards.org/cgi-bin/carddisp.pl?gene=TNFSF12-TNFSF13">https://www.genecards.org/cgi-bin/carddisp.pl?gene=TNFSF12-TNFSF13</a> |
| SLC26A4           | Solute Carrier Family 26 Member 4                                   | Protein Coding | 42 | GC07P107660 | 0.766114 | <a href="https://www.genecards.org/cgi-bin/carddisp.pl?gene=SLC26A4">https://www.genecards.org/cgi-bin/carddisp.pl?gene=SLC26A4</a>                 |
| COL4A3            | Collagen Type IV Alpha 3 Chain                                      | Protein Coding | 44 | GC02P227164 | 0.766052 | <a href="https://www.genecards.org/cgi-bin/carddisp.pl?gene=COL4A3">https://www.genecards.org/cgi-bin/carddisp.pl?gene=COL4A3</a>                   |
| LMNB2             | Lamin B2                                                            | Protein Coding | 42 | GC19M005364 | 0.766052 | <a href="https://www.genecards.org/cgi-bin/carddisp.pl?gene=LMNB2">https://www.genecards.org/cgi-bin/carddisp.pl?gene=LMNB2</a>                     |
| NAA80             | N-Alpha-Acetyltransferase 80, NatH Catalytic Subunit                | Protein Coding | 25 | GC03M051240 | 0.764308 | <a href="https://www.genecards.org/cgi-bin/carddisp.pl?gene=NAA80">https://www.genecards.org/cgi-bin/carddisp.pl?gene=NAA80</a>                     |
| PTGES2            | Prostaglandin E Synthase 2                                          | Protein Coding | 41 | GC09M128120 | 0.761813 | <a href="https://www.genecards.org/cgi-bin/carddisp.pl?gene=PTGES2">https://www.genecards.org/cgi-bin/carddisp.pl?gene=PTGES2</a>                   |
| SPR               | Sepiapterin Reductase                                               | Protein Coding | 49 | GC02P072850 | 0.761076 | <a href="https://www.genecards.org/cgi-bin/carddisp.pl?gene=SPR">https://www.genecards.org/cgi-bin/carddisp.pl?gene=SPR</a>                         |
| TSC2              | TSC Complex Subunit 2                                               | Protein Coding | 48 | GC16P011696 | 0.761076 | <a href="https://www.genecards.org/cgi-bin/carddisp.pl?gene=TSC2">https://www.genecards.org/cgi-bin/carddisp.pl?gene=TSC2</a>                       |
| ATP1A3            | ATPase Na <sup>+</sup> /K <sup>+</sup> Transporting Subunit Alpha 3 | Protein Coding | 46 | GC19M041966 | 0.761076 | <a href="https://www.genecards.org/cgi-bin/carddisp.pl?gene=ATP1A3">https://www.genecards.org/cgi-bin/carddisp.pl?gene=ATP1A3</a>                   |
| LIG4              | DNA Ligase 4                                                        | Protein Coding | 46 | GC13M108207 | 0.761076 | <a href="https://www.genecards.org/cgi-bin/carddisp.pl?gene=LIG4">https://www.genecards.org/cgi-bin/carddisp.pl?gene=LIG4</a>                       |
| NFS1              | NFS1 Cysteine Desulfurase                                           | Protein Coding | 45 | GC20M035668 | 0.761076 | <a href="https://www.genecards.org/cgi-bin/carddisp.pl?gene=NFS1">https://www.genecards.org/cgi-bin/carddisp.pl?gene=NFS1</a>                       |
| AGXT              | Alanine--Glyoxylate And Serine--Pyruvate Aminotransferase           | Protein Coding | 44 | GC02P240868 | 0.761076 | <a href="https://www.genecards.org/cgi-bin/carddisp.pl?gene=AGXT">https://www.genecards.org/cgi-bin/carddisp.pl?gene=AGXT</a>                       |

|        |                                                |                |    |             |          |                                                                                                                                   |
|--------|------------------------------------------------|----------------|----|-------------|----------|-----------------------------------------------------------------------------------------------------------------------------------|
| SLC7A9 | Solute Carrier Family 7 Member 9               | Protein Coding | 44 | GC19M032830 | 0.761076 | <a href="https://www.genecards.org/cgi-bin/carddisp.pl?gene=SLC7A9">https://www.genecards.org/cgi-bin/carddisp.pl?gene=SLC7A9</a> |
| TAF1   | TATA-Box Binding Protein Associated Factor 1   | Protein Coding | 44 | GC0XP071366 | 0.761076 | <a href="https://www.genecards.org/cgi-bin/carddisp.pl?gene=TAF1">https://www.genecards.org/cgi-bin/carddisp.pl?gene=TAF1</a>     |
| CHRNA1 | Cholinergic Receptor Nicotinic Alpha 1 Subunit | Protein Coding | 43 | GC02M174747 | 0.761076 | <a href="https://www.genecards.org/cgi-bin/carddisp.pl?gene=CHRNA1">https://www.genecards.org/cgi-bin/carddisp.pl?gene=CHRNA1</a> |
| CHRNE  | Cholinergic Receptor Nicotinic Epsilon Subunit | Protein Coding | 43 | GC17M004897 | 0.761076 | <a href="https://www.genecards.org/cgi-bin/carddisp.pl?gene=CHRNE">https://www.genecards.org/cgi-bin/carddisp.pl?gene=CHRNE</a>   |
| C7     | Complement C7                                  | Protein Coding | 42 | GC05P040909 | 0.761076 | <a href="https://www.genecards.org/cgi-bin/carddisp.pl?gene=C7">https://www.genecards.org/cgi-bin/carddisp.pl?gene=C7</a>         |
| PNKD   | PNKD Metallo-Beta-Lactamase Domain Containing  | Protein Coding | 42 | GC02P218270 | 0.761076 | <a href="https://www.genecards.org/cgi-bin/carddisp.pl?gene=PNKD">https://www.genecards.org/cgi-bin/carddisp.pl?gene=PNKD</a>     |
| SGCE   | Sarcoglycan Epsilon                            | Protein Coding | 42 | GC07M094524 | 0.761076 | <a href="https://www.genecards.org/cgi-bin/carddisp.pl?gene=SGCE">https://www.genecards.org/cgi-bin/carddisp.pl?gene=SGCE</a>     |
| RAPSN  | Receptor Associated Protein Of The Synapse     | Protein Coding | 41 | GC11M089370 | 0.761076 | <a href="https://www.genecards.org/cgi-bin/carddisp.pl?gene=RAPSN">https://www.genecards.org/cgi-bin/carddisp.pl?gene=RAPSN</a>   |
| AKAP12 | A-Kinase Anchoring Protein 12                  | Protein Coding | 40 | GC06P151239 | 0.761076 | <a href="https://www.genecards.org/cgi-bin/carddisp.pl?gene=AKAP12">https://www.genecards.org/cgi-bin/carddisp.pl?gene=AKAP12</a> |
| NHEJ1  | Non-Homologous End Joining Factor 1            | Protein Coding | 40 | GC02M219119 | 0.761076 | <a href="https://www.genecards.org/cgi-bin/carddisp.pl?gene=NHEJ1">https://www.genecards.org/cgi-bin/carddisp.pl?gene=NHEJ1</a>   |
| CALB2  | Calbindin 2                                    | Protein Coding | 39 | GC16P071358 | 0.761076 | <a href="https://www.genecards.org/cgi-bin/carddisp.pl?gene=CALB2">https://www.genecards.org/cgi-bin/carddisp.pl?gene=CALB2</a>   |
| PTMA   | Prothymosin Alpha                              | Protein Coding | 39 | GC02P231707 | 0.761076 | <a href="https://www.genecards.org/cgi-bin/carddisp.pl?gene=PTMA">https://www.genecards.org/cgi-bin/carddisp.pl?gene=PTMA</a>     |
| PRRT2  | Proline Rich Transmembrane Protein 2           | Protein Coding | 38 | GC16P029811 | 0.761076 | <a href="https://www.genecards.org/cgi-bin/carddisp.pl?gene=PRRT2">https://www.genecards.org/cgi-bin/carddisp.pl?gene=PRRT2</a>   |
| HOGA1  | 4-Hydroxy-2-Oxoglutarate Aldolase 1            | Protein Coding | 37 | GC10P097586 | 0.761076 | <a href="https://www.genecards.org/cgi-">https://www.genecards.org/cgi-</a>                                                       |

|         |                                                   |                |    |             |          |                                                                                                                                     |
|---------|---------------------------------------------------|----------------|----|-------------|----------|-------------------------------------------------------------------------------------------------------------------------------------|
|         |                                                   |                |    |             |          | <a href="#">bin/carddisp.pl?gene=HOGA1</a>                                                                                          |
| NLRP4   | NLR Family Pyrin Domain Containing 4              | Protein Coding | 36 | GC19P055836 | 0.761076 | <a href="https://www.genecards.org/cgi-bin/carddisp.pl?gene=NLRP4">https://www.genecards.org/cgi-bin/carddisp.pl?gene=NLRP4</a>     |
| LRRC56  | Leucine Rich Repeat Containing 56                 | Protein Coding | 34 | GC11P000518 | 0.761076 | <a href="https://www.genecards.org/cgi-bin/carddisp.pl?gene=LRRC56">https://www.genecards.org/cgi-bin/carddisp.pl?gene=LRRC56</a>   |
| SUCO    | SUN Domain Containing Ossification Factor         | Protein Coding | 33 | GC01P172532 | 0.761076 | <a href="https://www.genecards.org/cgi-bin/carddisp.pl?gene=SUCO">https://www.genecards.org/cgi-bin/carddisp.pl?gene=SUCO</a>       |
| TAF1L   | TATA-Box Binding Protein Associated Factor 1 Like | Protein Coding | 33 | GC09M032619 | 0.761076 | <a href="https://www.genecards.org/cgi-bin/carddisp.pl?gene=TAF1L">https://www.genecards.org/cgi-bin/carddisp.pl?gene=TAF1L</a>     |
| UBTD1   | Ubiquitin Domain Containing 1                     | Protein Coding | 33 | GC10P097498 | 0.761076 | <a href="https://www.genecards.org/cgi-bin/carddisp.pl?gene=UBTD1">https://www.genecards.org/cgi-bin/carddisp.pl?gene=UBTD1</a>     |
| TERC    | Telomerase RNA Component                          | RNA Gene       | 29 | GC03M169765 | 0.761076 | <a href="https://www.genecards.org/cgi-bin/carddisp.pl?gene=TERC">https://www.genecards.org/cgi-bin/carddisp.pl?gene=TERC</a>       |
| EVPLL   | Envoplakin Like                                   | Protein Coding | 27 | GC17P054656 | 0.761076 | <a href="https://www.genecards.org/cgi-bin/carddisp.pl?gene=EVPLL">https://www.genecards.org/cgi-bin/carddisp.pl?gene=EVPLL</a>     |
| MIR449C | MicroRNA 449c                                     | RNA Gene       | 18 | GC05M055173 | 0.761076 | <a href="https://www.genecards.org/cgi-bin/carddisp.pl?gene=MIR449C">https://www.genecards.org/cgi-bin/carddisp.pl?gene=MIR449C</a> |
| MYAS1   | Myasthenia Gravis With Thymus Hyperplasia         | Genetic Locus  | 2  | GC06U990322 | 0.761076 | <a href="https://www.genecards.org/cgi-bin/carddisp.pl?gene=MYAS1">https://www.genecards.org/cgi-bin/carddisp.pl?gene=MYAS1</a>     |
| THM     | Thymoma                                           | Genetic Locus  | 2  | GC00U990370 | 0.761076 | <a href="https://www.genecards.org/cgi-bin/carddisp.pl?gene=THM">https://www.genecards.org/cgi-bin/carddisp.pl?gene=THM</a>         |
| CSF2RB  | Colony Stimulating Factor 2 Receptor Subunit Beta | Protein Coding | 46 | GC22P036913 | 0.738352 | <a href="https://www.genecards.org/cgi-bin/carddisp.pl?gene=CSF2RB">https://www.genecards.org/cgi-bin/carddisp.pl?gene=CSF2RB</a>   |
| CLIC1   | Chloride Intracellular Channel 1                  | Protein Coding | 40 | GC06M065968 | 0.738352 | <a href="https://www.genecards.org/cgi-bin/carddisp.pl?gene=CLIC1">https://www.genecards.org/cgi-bin/carddisp.pl?gene=CLIC1</a>     |
| EGFL8   | EGF Like Domain Multiple 8                        | Protein Coding | 34 | GC06P083721 | 0.738352 | <a href="https://www.genecards.org/cgi-bin/carddisp.pl?gene=EGFL8">https://www.genecards.org/cgi-bin/carddisp.pl?gene=EGFL8</a>     |

|         |                                                                                        |                |    |             |          |                                                                                                                                     |
|---------|----------------------------------------------------------------------------------------|----------------|----|-------------|----------|-------------------------------------------------------------------------------------------------------------------------------------|
| ATF1    | Activating Transcription Factor 1                                                      | Protein Coding | 43 | GC12P050763 | 0.737481 | <a href="https://www.genecards.org/cgi-bin/carddisp.pl?gene=ATF1">https://www.genecards.org/cgi-bin/carddisp.pl?gene=ATF1</a>       |
| PDK1    | Pyruvate Dehydrogenase Kinase 1                                                        | Protein Coding | 45 | GC02P172555 | 0.736053 | <a href="https://www.genecards.org/cgi-bin/carddisp.pl?gene=PDK1">https://www.genecards.org/cgi-bin/carddisp.pl?gene=PDK1</a>       |
| RAB7A   | RAB7A, Member RAS Oncogene Family                                                      | Protein Coding | 45 | GC03P134197 | 0.734205 | <a href="https://www.genecards.org/cgi-bin/carddisp.pl?gene=RAB7A">https://www.genecards.org/cgi-bin/carddisp.pl?gene=RAB7A</a>     |
| IBD5    | Inflammatory Bowel Disease 5                                                           | Genetic Locus  | 5  | GC05U990104 | 0.732442 | <a href="https://www.genecards.org/cgi-bin/carddisp.pl?gene=IBD5">https://www.genecards.org/cgi-bin/carddisp.pl?gene=IBD5</a>       |
| KIR3DL2 | Killer Cell Immunoglobulin Like Receptor, Three Ig Domains And Long Cytoplasmic Tail 2 | Protein Coding | 39 | GC19P067386 | 0.731972 | <a href="https://www.genecards.org/cgi-bin/carddisp.pl?gene=KIR3DL2">https://www.genecards.org/cgi-bin/carddisp.pl?gene=KIR3DL2</a> |
| CD5L    | CD5 Molecule Like                                                                      | Protein Coding | 38 | GC01M157800 | 0.731972 | <a href="https://www.genecards.org/cgi-bin/carddisp.pl?gene=CD5L">https://www.genecards.org/cgi-bin/carddisp.pl?gene=CD5L</a>       |
| DEFA5   | Defensin Alpha 5                                                                       | Protein Coding | 37 | GC08M007057 | 0.731972 | <a href="https://www.genecards.org/cgi-bin/carddisp.pl?gene=DEFA5">https://www.genecards.org/cgi-bin/carddisp.pl?gene=DEFA5</a>     |
| DEFA6   | Defensin Alpha 6                                                                       | Protein Coding | 36 | GC08M006924 | 0.731972 | <a href="https://www.genecards.org/cgi-bin/carddisp.pl?gene=DEFA6">https://www.genecards.org/cgi-bin/carddisp.pl?gene=DEFA6</a>     |
| E2F1    | E2F Transcription Factor 1                                                             | Protein Coding | 42 | GC20M033675 | 0.72554  | <a href="https://www.genecards.org/cgi-bin/carddisp.pl?gene=E2F1">https://www.genecards.org/cgi-bin/carddisp.pl?gene=E2F1</a>       |
| CORIN   | Corin, Serine Peptidase                                                                | Protein Coding | 43 | GC04M047596 | 0.716256 | <a href="https://www.genecards.org/cgi-bin/carddisp.pl?gene=CORIN">https://www.genecards.org/cgi-bin/carddisp.pl?gene=CORIN</a>     |
| UBTF    | Upstream Binding Transcription Factor                                                  | Protein Coding | 41 | GC17M044205 | 0.716256 | <a href="https://www.genecards.org/cgi-bin/carddisp.pl?gene=UBTF">https://www.genecards.org/cgi-bin/carddisp.pl?gene=UBTF</a>       |
| LMNB1   | Lamin B1                                                                               | Protein Coding | 45 | GC05P126776 | 0.709613 | <a href="https://www.genecards.org/cgi-bin/carddisp.pl?gene=LMNB1">https://www.genecards.org/cgi-bin/carddisp.pl?gene=LMNB1</a>     |
| DPYD    | Dihydropyrimidine Dehydrogenase                                                        | Protein Coding | 50 | GC01M097015 | 0.705716 | <a href="https://www.genecards.org/cgi-bin/carddisp.pl?gene=DPYD">https://www.genecards.org/cgi-bin/carddisp.pl?gene=DPYD</a>       |

|         |                                                      |                |    |             |          |                                                                                                                                     |
|---------|------------------------------------------------------|----------------|----|-------------|----------|-------------------------------------------------------------------------------------------------------------------------------------|
| SNCA    | Synuclein Alpha                                      | Protein Coding | 48 | GC04M089724 | 0.705716 | <a href="https://www.genecards.org/cgi-bin/carddisp.pl?gene=SNCA">https://www.genecards.org/cgi-bin/carddisp.pl?gene=SNCA</a>       |
| DUSP6   | Dual Specificity Phosphatase 6                       | Protein Coding | 47 | GC12M089347 | 0.705716 | <a href="https://www.genecards.org/cgi-bin/carddisp.pl?gene=DUSP6">https://www.genecards.org/cgi-bin/carddisp.pl?gene=DUSP6</a>     |
| ITGA3   | Integrin Subunit Alpha 3                             | Protein Coding | 46 | GC17P050055 | 0.705716 | <a href="https://www.genecards.org/cgi-bin/carddisp.pl?gene=ITGA3">https://www.genecards.org/cgi-bin/carddisp.pl?gene=ITGA3</a>     |
| ABCC4   | ATP Binding Cassette Subfamily C Member 4            | Protein Coding | 45 | GC13M095019 | 0.705716 | <a href="https://www.genecards.org/cgi-bin/carddisp.pl?gene=ABCC4">https://www.genecards.org/cgi-bin/carddisp.pl?gene=ABCC4</a>     |
| GNRHR   | Gonadotropin Releasing Hormone Receptor              | Protein Coding | 45 | GC04M067737 | 0.705716 | <a href="https://www.genecards.org/cgi-bin/carddisp.pl?gene=GNRHR">https://www.genecards.org/cgi-bin/carddisp.pl?gene=GNRHR</a>     |
| LHCGR   | Luteinizing Hormone/Choriogonadotropin Receptor      | Protein Coding | 45 | GC02M048686 | 0.705716 | <a href="https://www.genecards.org/cgi-bin/carddisp.pl?gene=LHCGR">https://www.genecards.org/cgi-bin/carddisp.pl?gene=LHCGR</a>     |
| MOG     | Myelin Oligodendrocyte Glycoprotein                  | Protein Coding | 45 | GC06P083635 | 0.705716 | <a href="https://www.genecards.org/cgi-bin/carddisp.pl?gene=MOG">https://www.genecards.org/cgi-bin/carddisp.pl?gene=MOG</a>         |
| NR0B1   | Nuclear Receptor Subfamily 0 Group B Member 1        | Protein Coding | 45 | GC0XM030304 | 0.705716 | <a href="https://www.genecards.org/cgi-bin/carddisp.pl?gene=NR0B1">https://www.genecards.org/cgi-bin/carddisp.pl?gene=NR0B1</a>     |
| ADRA2C  | Adrenoceptor Alpha 2C                                | Protein Coding | 44 | GC04P003766 | 0.705716 | <a href="https://www.genecards.org/cgi-bin/carddisp.pl?gene=ADRA2C">https://www.genecards.org/cgi-bin/carddisp.pl?gene=ADRA2C</a>   |
| KCNA4   | Potassium Voltage-Gated Channel Subfamily A Member 4 | Protein Coding | 44 | GC11M030009 | 0.705716 | <a href="https://www.genecards.org/cgi-bin/carddisp.pl?gene=KCNA4">https://www.genecards.org/cgi-bin/carddisp.pl?gene=KCNA4</a>     |
| NEFL    | Neurofilament Light Chain                            | Protein Coding | 44 | GC08M024950 | 0.705716 | <a href="https://www.genecards.org/cgi-bin/carddisp.pl?gene=NEFL">https://www.genecards.org/cgi-bin/carddisp.pl?gene=NEFL</a>       |
| FLRT3   | Fibronectin Leucine Rich Transmembrane Protein 3     | Protein Coding | 43 | GC20M014322 | 0.705716 | <a href="https://www.genecards.org/cgi-bin/carddisp.pl?gene=FLRT3">https://www.genecards.org/cgi-bin/carddisp.pl?gene=FLRT3</a>     |
| GMPS    | Guanine Monophosphate Synthase                       | Protein Coding | 43 | GC03P155870 | 0.705716 | <a href="https://www.genecards.org/cgi-bin/carddisp.pl?gene=GMPS">https://www.genecards.org/cgi-bin/carddisp.pl?gene=GMPS</a>       |
| RNASEH1 | Ribonuclease H1                                      | Protein Coding | 43 | GC02M003522 | 0.705716 | <a href="https://www.genecards.org/cgi-bin/carddisp.pl?gene=RNASEH1">https://www.genecards.org/cgi-bin/carddisp.pl?gene=RNASEH1</a> |

|         |                                               |                |    |             |          |                                                                                                                                     |
|---------|-----------------------------------------------|----------------|----|-------------|----------|-------------------------------------------------------------------------------------------------------------------------------------|
|         |                                               |                |    |             |          | <a href="#">bin/carddisp.pl?gene=RNASEH1</a>                                                                                        |
| FSHB    | Follicle Stimulating Hormone Subunit Beta     | Protein Coding | 42 | GC11P030210 | 0.705716 | <a href="https://www.genecards.org/cgi-bin/carddisp.pl?gene=FSHB">https://www.genecards.org/cgi-bin/carddisp.pl?gene=FSHB</a>       |
| HTT     | Huntingtin                                    | Protein Coding | 42 | GC04P003041 | 0.705716 | <a href="https://www.genecards.org/cgi-bin/carddisp.pl?gene=HTT">https://www.genecards.org/cgi-bin/carddisp.pl?gene=HTT</a>         |
| IL17RD  | Interleukin 17 Receptor D                     | Protein Coding | 42 | GC03M057089 | 0.705716 | <a href="https://www.genecards.org/cgi-bin/carddisp.pl?gene=IL17RD">https://www.genecards.org/cgi-bin/carddisp.pl?gene=IL17RD</a>   |
| LGI1    | Leucine Rich Glioma Inactivated 1             | Protein Coding | 42 | GC10P093757 | 0.705716 | <a href="https://www.genecards.org/cgi-bin/carddisp.pl?gene=LGI1">https://www.genecards.org/cgi-bin/carddisp.pl?gene=LGI1</a>       |
| POLR3A  | RNA Polymerase III Subunit A                  | Protein Coding | 42 | GC10M078577 | 0.705716 | <a href="https://www.genecards.org/cgi-bin/carddisp.pl?gene=POLR3A">https://www.genecards.org/cgi-bin/carddisp.pl?gene=POLR3A</a>   |
| SPRY4   | Sprouty RTK Signaling Antagonist 4            | Protein Coding | 42 | GC05M142310 | 0.705716 | <a href="https://www.genecards.org/cgi-bin/carddisp.pl?gene=SPRY4">https://www.genecards.org/cgi-bin/carddisp.pl?gene=SPRY4</a>     |
| TGM3    | Transglutaminase 3                            | Protein Coding | 42 | GC20P002296 | 0.705716 | <a href="https://www.genecards.org/cgi-bin/carddisp.pl?gene=TGM3">https://www.genecards.org/cgi-bin/carddisp.pl?gene=TGM3</a>       |
| CTSE    | Cathepsin E                                   | Protein Coding | 41 | GC01M206009 | 0.705716 | <a href="https://www.genecards.org/cgi-bin/carddisp.pl?gene=CTSE">https://www.genecards.org/cgi-bin/carddisp.pl?gene=CTSE</a>       |
| CYP4V2  | Cytochrome P450 Family 4 Subfamily V Member 2 | Protein Coding | 41 | GC04P186191 | 0.705716 | <a href="https://www.genecards.org/cgi-bin/carddisp.pl?gene=CYP4V2">https://www.genecards.org/cgi-bin/carddisp.pl?gene=CYP4V2</a>   |
| FCER1A  | Fc Epsilon Receptor Ia                        | Protein Coding | 41 | GC01P159259 | 0.705716 | <a href="https://www.genecards.org/cgi-bin/carddisp.pl?gene=FCER1A">https://www.genecards.org/cgi-bin/carddisp.pl?gene=FCER1A</a>   |
| HS6ST1  | Heparan Sulfate 6-O-Sulfotransferase 1        | Protein Coding | 41 | GC02M128236 | 0.705716 | <a href="https://www.genecards.org/cgi-bin/carddisp.pl?gene=HS6ST1">https://www.genecards.org/cgi-bin/carddisp.pl?gene=HS6ST1</a>   |
| IGBP1   | Immunoglobulin Binding Protein 1              | Protein Coding | 41 | GC0XP070133 | 0.705716 | <a href="https://www.genecards.org/cgi-bin/carddisp.pl?gene=IGBP1">https://www.genecards.org/cgi-bin/carddisp.pl?gene=IGBP1</a>     |
| IGHMBP2 | Immunoglobulin Mu DNA Binding Protein 2       | Protein Coding | 41 | GC11P068903 | 0.705716 | <a href="https://www.genecards.org/cgi-bin/carddisp.pl?gene=IGHMBP2">https://www.genecards.org/cgi-bin/carddisp.pl?gene=IGHMBP2</a> |

|         |                                                           |                |    |             |          |                                                                                                                                     |
|---------|-----------------------------------------------------------|----------------|----|-------------|----------|-------------------------------------------------------------------------------------------------------------------------------------|
| KISS1   | KiSS-1 Metastasis Suppressor                              | Protein Coding | 41 | GC01M204190 | 0.705716 | <a href="https://www.genecards.org/cgi-bin/carddisp.pl?gene=KISS1">https://www.genecards.org/cgi-bin/carddisp.pl?gene=KISS1</a>     |
| PROKR2  | Prokineticin Receptor 2                                   | Protein Coding | 41 | GC20M005409 | 0.705716 | <a href="https://www.genecards.org/cgi-bin/carddisp.pl?gene=PROKR2">https://www.genecards.org/cgi-bin/carddisp.pl?gene=PROKR2</a>   |
| RCC1    | Regulator Of Chromosome Condensation 1                    | Protein Coding | 41 | GC01P028505 | 0.705716 | <a href="https://www.genecards.org/cgi-bin/carddisp.pl?gene=RCC1">https://www.genecards.org/cgi-bin/carddisp.pl?gene=RCC1</a>       |
| MS4A2   | Membrane Spanning 4-Domains A2                            | Protein Coding | 40 | GC11P060088 | 0.705716 | <a href="https://www.genecards.org/cgi-bin/carddisp.pl?gene=MS4A2">https://www.genecards.org/cgi-bin/carddisp.pl?gene=MS4A2</a>     |
| PACSIN2 | Protein Kinase C And Casein Kinase Substrate In Neurons 2 | Protein Coding | 40 | GC22M042835 | 0.705716 | <a href="https://www.genecards.org/cgi-bin/carddisp.pl?gene=PACSIN2">https://www.genecards.org/cgi-bin/carddisp.pl?gene=PACSIN2</a> |
| SFTPA2  | Surfactant Protein A2                                     | Protein Coding | 40 | GC10M081851 | 0.705716 | <a href="https://www.genecards.org/cgi-bin/carddisp.pl?gene=SFTPA2">https://www.genecards.org/cgi-bin/carddisp.pl?gene=SFTPA2</a>   |
| FEZF1   | FEZ Family Zinc Finger 1                                  | Protein Coding | 39 | GC07M122301 | 0.705716 | <a href="https://www.genecards.org/cgi-bin/carddisp.pl?gene=FEZF1">https://www.genecards.org/cgi-bin/carddisp.pl?gene=FEZF1</a>     |
| MADCAM1 | Mucosal Vascular Addressin Cell Adhesion Molecule 1       | Protein Coding | 39 | GC19P002778 | 0.705716 | <a href="https://www.genecards.org/cgi-bin/carddisp.pl?gene=MADCAM1">https://www.genecards.org/cgi-bin/carddisp.pl?gene=MADCAM1</a> |
| CSAD    | Cysteine Sulfinic Acid Decarboxylase                      | Protein Coding | 38 | GC12M053160 | 0.705716 | <a href="https://www.genecards.org/cgi-bin/carddisp.pl?gene=CSAD">https://www.genecards.org/cgi-bin/carddisp.pl?gene=CSAD</a>       |
| LHB     | Luteinizing Hormone Subunit Beta                          | Protein Coding | 38 | GC19M049015 | 0.705716 | <a href="https://www.genecards.org/cgi-bin/carddisp.pl?gene=LHB">https://www.genecards.org/cgi-bin/carddisp.pl?gene=LHB</a>         |
| NUDT15  | Nudix Hydrolase 15                                        | Protein Coding | 38 | GC13P048037 | 0.705716 | <a href="https://www.genecards.org/cgi-bin/carddisp.pl?gene=NUDT15">https://www.genecards.org/cgi-bin/carddisp.pl?gene=NUDT15</a>   |
| WDR11   | WD Repeat Domain 11                                       | Protein Coding | 38 | GC10P120851 | 0.705716 | <a href="https://www.genecards.org/cgi-bin/carddisp.pl?gene=WDR11">https://www.genecards.org/cgi-bin/carddisp.pl?gene=WDR11</a>     |
| CRLF2   | Cytokine Receptor Like Factor 2                           | Protein Coding | 37 | GC0XM001190 | 0.705716 | <a href="https://www.genecards.org/cgi-bin/carddisp.pl?gene=CRLF2">https://www.genecards.org/cgi-bin/carddisp.pl?gene=CRLF2</a>     |
| NSMF    | NMDA Receptor Synaptonuclear Signaling                    | Protein Coding | 37 | GC09M137447 | 0.705716 | <a href="https://www.genecards.org/cgi-">https://www.genecards.org/cgi-</a>                                                         |



|              |                                                |                   |    |              |          |                                                                                                                                                      |
|--------------|------------------------------------------------|-------------------|----|--------------|----------|------------------------------------------------------------------------------------------------------------------------------------------------------|
|              | And Neuronal Migration Factor                  |                   |    |              |          | <a href="http://www.ncbi.nlm.nih.gov/ncbi/cdd/bin/carddisp.pl?gene=NSMF">bin/carddisp.pl?gene=NSMF</a>                                               |
| SNRPC        | Small Nuclear Ribonucleoprotein Polypeptide C  | Protein Coding    | 37 | GC06P083816  | 0.705716 | <a href="http://www.ncbi.nlm.nih.gov/ncbi/cdd/bin/carddisp.pl?gene=SNRPC">https://www.genecards.org/cgi-bin/carddisp.pl?gene=SNRPC</a>               |
| ANOS1        | Anosmin 1                                      | Protein Coding    | 36 | GC0XM008528  | 0.705716 | <a href="http://www.ncbi.nlm.nih.gov/ncbi/cdd/bin/carddisp.pl?gene=ANOS1">https://www.genecards.org/cgi-bin/carddisp.pl?gene=ANOS1</a>               |
| CSN3         | Casein Kappa                                   | Protein Coding    | 36 | GC04P070242  | 0.705716 | <a href="http://www.ncbi.nlm.nih.gov/ncbi/cdd/bin/carddisp.pl?gene=CSN3">https://www.genecards.org/cgi-bin/carddisp.pl?gene=CSN3</a>                 |
| UGT1A8       | UDP Glucuronosyltransferase Family 1 Member A8 | Protein Coding    | 36 | GC02P233618  | 0.705716 | <a href="http://www.ncbi.nlm.nih.gov/ncbi/cdd/bin/carddisp.pl?gene=UGT1A8">https://www.genecards.org/cgi-bin/carddisp.pl?gene=UGT1A8</a>             |
| NDNF         | Neuron Derived Neurotrophic Factor             | Protein Coding    | 35 | GC04M121035  | 0.705716 | <a href="http://www.ncbi.nlm.nih.gov/ncbi/cdd/bin/carddisp.pl?gene=NDNF">https://www.genecards.org/cgi-bin/carddisp.pl?gene=NDNF</a>                 |
| ADM2         | Adrenomedullin 2                               | Protein Coding    | 34 | GC22P050481  | 0.705716 | <a href="http://www.ncbi.nlm.nih.gov/ncbi/cdd/bin/carddisp.pl?gene=ADM2">https://www.genecards.org/cgi-bin/carddisp.pl?gene=ADM2</a>                 |
| CNOT11       | CCR4-NOT Transcription Complex Subunit 11      | Protein Coding    | 30 | GC02P101252  | 0.705716 | <a href="http://www.ncbi.nlm.nih.gov/ncbi/cdd/bin/carddisp.pl?gene=CNOT11">https://www.genecards.org/cgi-bin/carddisp.pl?gene=CNOT11</a>             |
| DEFB103A     | Defensin Beta 103A                             | Protein Coding    | 26 | GC08P007881  | 0.705716 | <a href="http://www.ncbi.nlm.nih.gov/ncbi/cdd/bin/carddisp.pl?gene=DEFB103A">https://www.genecards.org/cgi-bin/carddisp.pl?gene=DEFB103A</a>         |
| LINC01194    | Long Intergenic Non-Protein Coding RNA 1194    | RNA Gene          | 17 | GC05P012578  | 0.705716 | <a href="http://www.ncbi.nlm.nih.gov/ncbi/cdd/bin/carddisp.pl?gene=LINC01194">https://www.genecards.org/cgi-bin/carddisp.pl?gene=LINC01194</a>       |
| ZFAT-AS1     | ZFAT Antisense RNA 1                           | RNA Gene          | 16 | GC08P134643  | 0.705716 | <a href="http://www.ncbi.nlm.nih.gov/ncbi/cdd/bin/carddisp.pl?gene=ZFAT-AS1">https://www.genecards.org/cgi-bin/carddisp.pl?gene=ZFAT-AS1</a>         |
| MIR3681      | MicroRNA 3681                                  | RNA Gene          | 12 | GC02P012199  | 0.705716 | <a href="http://www.ncbi.nlm.nih.gov/ncbi/cdd/bin/carddisp.pl?gene=MIR3681">https://www.genecards.org/cgi-bin/carddisp.pl?gene=MIR3681</a>           |
| MT-TR        | Mitochondrially Encoded TRNA-Arg (CGN)         | RNA Gene          | 12 | GCMT P010407 | 0.705716 | <a href="http://www.ncbi.nlm.nih.gov/ncbi/cdd/bin/carddisp.pl?gene=MT-TR">https://www.genecards.org/cgi-bin/carddisp.pl?gene=MT-TR</a>               |
| LOC110806263 | TERT 5' Regulatory Region                      | Biological Region | 3  | GC05P001294  | 0.705716 | <a href="http://www.ncbi.nlm.nih.gov/ncbi/cdd/bin/carddisp.pl?gene=LOC110806263">https://www.genecards.org/cgi-bin/carddisp.pl?gene=LOC110806263</a> |

|          |                                                           |                |    |             |          |                                                                                                                                       |
|----------|-----------------------------------------------------------|----------------|----|-------------|----------|---------------------------------------------------------------------------------------------------------------------------------------|
| TENM3    | Teneurin Transmembrane Protein 3                          | Protein Coding | 37 | GC04P181448 | 0.700934 | <a href="https://www.genecards.org/cgi-bin/carddisp.pl?gene=TENM3">https://www.genecards.org/cgi-bin/carddisp.pl?gene=TENM3</a>       |
| IL27RA   | Interleukin 27 Receptor Subunit Alpha                     | Protein Coding | 39 | GC19P014031 | 0.700063 | <a href="https://www.genecards.org/cgi-bin/carddisp.pl?gene=IL27RA">https://www.genecards.org/cgi-bin/carddisp.pl?gene=IL27RA</a>     |
| ZBTB7A   | Zinc Finger And BTB Domain Containing 7A                  | Protein Coding | 37 | GC19M005443 | 0.700063 | <a href="https://www.genecards.org/cgi-bin/carddisp.pl?gene=ZBTB7A">https://www.genecards.org/cgi-bin/carddisp.pl?gene=ZBTB7A</a>     |
| FASN     | Fatty Acid Synthase                                       | Protein Coding | 47 | GC17M082078 | 0.698669 | <a href="https://www.genecards.org/cgi-bin/carddisp.pl?gene=FASN">https://www.genecards.org/cgi-bin/carddisp.pl?gene=FASN</a>         |
| WDR5     | WD Repeat Domain 5                                        | Protein Coding | 42 | GC09P134135 | 0.688472 | <a href="https://www.genecards.org/cgi-bin/carddisp.pl?gene=WDR5">https://www.genecards.org/cgi-bin/carddisp.pl?gene=WDR5</a>         |
| SOAT1    | Sterol O-Acyltransferase 1                                | Protein Coding | 43 | GC01P179262 | 0.683136 | <a href="https://www.genecards.org/cgi-bin/carddisp.pl?gene=SOAT1">https://www.genecards.org/cgi-bin/carddisp.pl?gene=SOAT1</a>       |
| PSEN1    | Presenilin 1                                              | Protein Coding | 50 | GC14P073136 | 0.678235 | <a href="https://www.genecards.org/cgi-bin/carddisp.pl?gene=PSEN1">https://www.genecards.org/cgi-bin/carddisp.pl?gene=PSEN1</a>       |
| EPHX1    | Epoxide Hydrolase 1                                       | Protein Coding | 44 | GC01P225810 | 0.672335 | <a href="https://www.genecards.org/cgi-bin/carddisp.pl?gene=EPHX1">https://www.genecards.org/cgi-bin/carddisp.pl?gene=EPHX1</a>       |
| IDO2     | Indoleamine 2,3-Dioxygenase 2                             | Protein Coding | 36 | GC08P039965 | 0.672335 | <a href="https://www.genecards.org/cgi-bin/carddisp.pl?gene=IDO2">https://www.genecards.org/cgi-bin/carddisp.pl?gene=IDO2</a>         |
| PRKAB1   | Protein Kinase AMP-Activated Non-Catalytic Subunit Beta 1 | Protein Coding | 45 | GC12P119632 | 0.671612 | <a href="https://www.genecards.org/cgi-bin/carddisp.pl?gene=PRKAB1">https://www.genecards.org/cgi-bin/carddisp.pl?gene=PRKAB1</a>     |
| PPARGC1A | PPARG Coactivator 1 Alpha                                 | Protein Coding | 44 | GC04M023755 | 0.671612 | <a href="https://www.genecards.org/cgi-bin/carddisp.pl?gene=PPARGC1A">https://www.genecards.org/cgi-bin/carddisp.pl?gene=PPARGC1A</a> |
| TUBB     | Tubulin Beta Class I                                      | Protein Coding | 48 | GC06P083675 | 0.664799 | <a href="https://www.genecards.org/cgi-bin/carddisp.pl?gene=TUBB">https://www.genecards.org/cgi-bin/carddisp.pl?gene=TUBB</a>         |
| FOXP1    | Forkhead Box P1                                           | Protein Coding | 44 | GC03M070926 | 0.664799 | <a href="https://www.genecards.org/cgi-bin/carddisp.pl?gene=FOXP1">https://www.genecards.org/cgi-bin/carddisp.pl?gene=FOXP1</a>       |
| PRICKLE2 | Prickle Planar Cell Polarity Protein 2                    | Protein Coding | 38 | GC03M064079 | 0.664799 | <a href="https://www.genecards.org/cgi-bin/carddisp.pl?gene=PRICKLE2">https://www.genecards.org/cgi-bin/carddisp.pl?gene=PRICKLE2</a> |

|           |                                                           |                |    |             |          |                                                                                                                                                |
|-----------|-----------------------------------------------------------|----------------|----|-------------|----------|------------------------------------------------------------------------------------------------------------------------------------------------|
|           |                                                           |                |    |             |          | <a href="http://www.ncbi.nlm.nih.gov/ncbi/cdd/bin/carddisp.pl?gene=PRICKLE2">bin/carddisp.pl?gene=PRICKLE2</a>                                 |
| MRPL23    | Mitochondrial Ribosomal Protein L23                       | Protein Coding | 36 | GC11P001948 | 0.664799 | <a href="http://www.ncbi.nlm.nih.gov/ncbi/cdd/bin/carddisp.pl?gene=MRPL23">https://www.genecards.org/cgi-bin/carddisp.pl?gene=MRPL23</a>       |
| VAR1      | Valyl-TRNA Synthetase 1                                   | Protein Coding | 35 | GC06M065973 | 0.664799 | <a href="http://www.ncbi.nlm.nih.gov/ncbi/cdd/bin/carddisp.pl?gene=VAR1">https://www.genecards.org/cgi-bin/carddisp.pl?gene=VAR1</a>           |
| VWA7      | Von Willebrand Factor A Domain Containing 7               | Protein Coding | 31 | GC06M065969 | 0.664799 | <a href="http://www.ncbi.nlm.nih.gov/ncbi/cdd/bin/carddisp.pl?gene=VWA7">https://www.genecards.org/cgi-bin/carddisp.pl?gene=VWA7</a>           |
| SNHG32    | Small Nucleolar RNA Host Gene 32                          | RNA Gene       | 22 | GC06P087379 | 0.664799 | <a href="http://www.ncbi.nlm.nih.gov/ncbi/cdd/bin/carddisp.pl?gene=SNHG32">https://www.genecards.org/cgi-bin/carddisp.pl?gene=SNHG32</a>       |
| LINC00243 | Long Intergenic Non-Protein Coding RNA 243                | RNA Gene       | 18 | GC06M065884 | 0.664799 | <a href="http://www.ncbi.nlm.nih.gov/ncbi/cdd/bin/carddisp.pl?gene=LINC00243">https://www.genecards.org/cgi-bin/carddisp.pl?gene=LINC00243</a> |
| SNORD48   | Small Nucleolar RNA, C/D Box 48                           | RNA Gene       | 17 | GC06P083715 | 0.664799 | <a href="http://www.ncbi.nlm.nih.gov/ncbi/cdd/bin/carddisp.pl?gene=SNORD48">https://www.genecards.org/cgi-bin/carddisp.pl?gene=SNORD48</a>     |
| FARSA     | Phenylalanyl-TRNA Synthetase Subunit Alpha                | Protein Coding | 41 | GC19M012922 | 0.659761 | <a href="http://www.ncbi.nlm.nih.gov/ncbi/cdd/bin/carddisp.pl?gene=FARSA">https://www.genecards.org/cgi-bin/carddisp.pl?gene=FARSA</a>         |
| CALCB     | Calcitonin Related Polypeptide Beta                       | Protein Coding | 37 | GC11P014904 | 0.659761 | <a href="http://www.ncbi.nlm.nih.gov/ncbi/cdd/bin/carddisp.pl?gene=CALCB">https://www.genecards.org/cgi-bin/carddisp.pl?gene=CALCB</a>         |
| TINAGL1   | Tubulointerstitial Nephritis Antigen Like 1               | Protein Coding | 37 | GC01P031576 | 0.659761 | <a href="http://www.ncbi.nlm.nih.gov/ncbi/cdd/bin/carddisp.pl?gene=TINAGL1">https://www.genecards.org/cgi-bin/carddisp.pl?gene=TINAGL1</a>     |
| TRAT1     | T Cell Receptor Associated Transmembrane Adaptor 1        | Protein Coding | 36 | GC03P108823 | 0.659749 | <a href="http://www.ncbi.nlm.nih.gov/ncbi/cdd/bin/carddisp.pl?gene=TRAT1">https://www.genecards.org/cgi-bin/carddisp.pl?gene=TRAT1</a>         |
| SETD6     | SET Domain Containing 6, Protein Lysine Methyltransferase | Protein Coding | 35 | GC16P058514 | 0.659749 | <a href="http://www.ncbi.nlm.nih.gov/ncbi/cdd/bin/carddisp.pl?gene=SETD6">https://www.genecards.org/cgi-bin/carddisp.pl?gene=SETD6</a>         |
| UHRF1     | Ubiquitin Like With PHD And Ring Finger Domains 1         | Protein Coding | 38 | GC19P004960 | 0.648814 | <a href="http://www.ncbi.nlm.nih.gov/ncbi/cdd/bin/carddisp.pl?gene=UHRF1">https://www.genecards.org/cgi-bin/carddisp.pl?gene=UHRF1</a>         |
| OPRL1     | Opioid Related Nociceptin Receptor 1                      | Protein Coding | 45 | GC20P064080 | 0.641638 | <a href="http://www.ncbi.nlm.nih.gov/ncbi/cdd/bin/carddisp.pl?gene=OPRL1">https://www.genecards.org/cgi-bin/carddisp.pl?gene=OPRL1</a>         |

|         |                                                                               |                |    |             |          |                                                                                                                                     |
|---------|-------------------------------------------------------------------------------|----------------|----|-------------|----------|-------------------------------------------------------------------------------------------------------------------------------------|
| PDPK1   | 3-Phosphoinositide Dependent Protein Kinase 1                                 | Protein Coding | 47 | GC16P002537 | 0.636199 | <a href="https://www.genecards.org/cgi-bin/carddisp.pl?gene=PDPK1">https://www.genecards.org/cgi-bin/carddisp.pl?gene=PDPK1</a>     |
| FUCA1   | Alpha-L-Fucosidase 1                                                          | Protein Coding | 46 | GC01M023845 | 0.63606  | <a href="https://www.genecards.org/cgi-bin/carddisp.pl?gene=FUCA1">https://www.genecards.org/cgi-bin/carddisp.pl?gene=FUCA1</a>     |
| TNNI2   | Troponin I2, Fast Skeletal Type                                               | Protein Coding | 43 | GC11P001865 | 0.63606  | <a href="https://www.genecards.org/cgi-bin/carddisp.pl?gene=TNNI2">https://www.genecards.org/cgi-bin/carddisp.pl?gene=TNNI2</a>     |
| SMAD1   | SMAD Family Member 1                                                          | Protein Coding | 41 | GC04P145481 | 0.63606  | <a href="https://www.genecards.org/cgi-bin/carddisp.pl?gene=SMAD1">https://www.genecards.org/cgi-bin/carddisp.pl?gene=SMAD1</a>     |
| NOG     | Noggin                                                                        | Protein Coding | 45 | GC17P056593 | 0.635476 | <a href="https://www.genecards.org/cgi-bin/carddisp.pl?gene=NOG">https://www.genecards.org/cgi-bin/carddisp.pl?gene=NOG</a>         |
| HSD3B2  | Hydroxy-Delta-5-Steroid Dehydrogenase, 3 Beta- And Steroid Delta- Isomerase 2 | Protein Coding | 45 | GC01P119414 | 0.632033 | <a href="https://www.genecards.org/cgi-bin/carddisp.pl?gene=HSD3B2">https://www.genecards.org/cgi-bin/carddisp.pl?gene=HSD3B2</a>   |
| PPP2R1A | Protein Phosphatase 2 Scaffold Subunit Aalpha                                 | Protein Coding | 45 | GC19P067249 | 0.632033 | <a href="https://www.genecards.org/cgi-bin/carddisp.pl?gene=PPP2R1A">https://www.genecards.org/cgi-bin/carddisp.pl?gene=PPP2R1A</a> |
| MAP3K12 | Mitogen-Activated Protein Kinase Kinase Kinase 12                             | Protein Coding | 44 | GC12M053479 | 0.632033 | <a href="https://www.genecards.org/cgi-bin/carddisp.pl?gene=MAP3K12">https://www.genecards.org/cgi-bin/carddisp.pl?gene=MAP3K12</a> |
| CYP4F3  | Cytochrome P450 Family 4 Subfamily F Member 3                                 | Protein Coding | 42 | GC19P015640 | 0.632033 | <a href="https://www.genecards.org/cgi-bin/carddisp.pl?gene=CYP4F3">https://www.genecards.org/cgi-bin/carddisp.pl?gene=CYP4F3</a>   |
| TCP1    | T-Complex 1                                                                   | Protein Coding | 42 | GC06M159778 | 0.632033 | <a href="https://www.genecards.org/cgi-bin/carddisp.pl?gene=TCP1">https://www.genecards.org/cgi-bin/carddisp.pl?gene=TCP1</a>       |
| DNAJB1  | DnaJ Heat Shock Protein Family (Hsp40) Member B1                              | Protein Coding | 41 | GC19M014514 | 0.632033 | <a href="https://www.genecards.org/cgi-bin/carddisp.pl?gene=DNAJB1">https://www.genecards.org/cgi-bin/carddisp.pl?gene=DNAJB1</a>   |
| CRHBP   | Corticotropin Releasing Hormone Binding Protein                               | Protein Coding | 40 | GC05P076952 | 0.632033 | <a href="https://www.genecards.org/cgi-bin/carddisp.pl?gene=CRHBP">https://www.genecards.org/cgi-bin/carddisp.pl?gene=CRHBP</a>     |
| DNAJA1  | DnaJ Heat Shock Protein Family (Hsp40) Member A1                              | Protein Coding | 40 | GC09P033025 | 0.632033 | <a href="https://www.genecards.org/cgi-bin/carddisp.pl?gene=DNAJA1">https://www.genecards.org/cgi-bin/carddisp.pl?gene=DNAJA1</a>   |

|           |                                                                  |                |    |             |          |                                                                                                                                         |
|-----------|------------------------------------------------------------------|----------------|----|-------------|----------|-----------------------------------------------------------------------------------------------------------------------------------------|
| IGF2BP3   | Insulin Like Growth Factor 2 mRNA Binding Protein 3              | Protein Coding | 40 | GC07M023316 | 0.632033 | <a href="https://www.genecards.org/cgi-bin/carddisp.pl?gene=IGF2BP3">https://www.genecards.org/cgi-bin/carddisp.pl?gene=IGF2BP3</a>     |
| RPL9      | Ribosomal Protein L9                                             | Protein Coding | 40 | GC04M039452 | 0.632033 | <a href="https://www.genecards.org/cgi-bin/carddisp.pl?gene=RPL9">https://www.genecards.org/cgi-bin/carddisp.pl?gene=RPL9</a>           |
| TRPC1     | Transient Receptor Potential Cation Channel Subfamily C Member 1 | Protein Coding | 40 | GC03P142724 | 0.632033 | <a href="https://www.genecards.org/cgi-bin/carddisp.pl?gene=TRPC1">https://www.genecards.org/cgi-bin/carddisp.pl?gene=TRPC1</a>         |
| TIMM50    | Translocase Of Inner Mitochondrial Membrane 50                   | Protein Coding | 38 | GC19P039480 | 0.632033 | <a href="https://www.genecards.org/cgi-bin/carddisp.pl?gene=TIMM50">https://www.genecards.org/cgi-bin/carddisp.pl?gene=TIMM50</a>       |
| RBM39     | RNA Binding Motif Protein 39                                     | Protein Coding | 37 | GC20M035703 | 0.632033 | <a href="https://www.genecards.org/cgi-bin/carddisp.pl?gene=RBM39">https://www.genecards.org/cgi-bin/carddisp.pl?gene=RBM39</a>         |
| ZC3H12A   | Zinc Finger CCCH-Type Containing 12A                             | Protein Coding | 36 | GC01P037474 | 0.632033 | <a href="https://www.genecards.org/cgi-bin/carddisp.pl?gene=ZC3H12A">https://www.genecards.org/cgi-bin/carddisp.pl?gene=ZC3H12A</a>     |
| H2BC12L   | H2B Clustered Histone 12 Like                                    | Protein Coding | 23 | GC21P043569 | 0.632033 | <a href="https://www.genecards.org/cgi-bin/carddisp.pl?gene=H2BC12L">https://www.genecards.org/cgi-bin/carddisp.pl?gene=H2BC12L</a>     |
| MIR3926-1 | MicroRNA 3926-1                                                  | RNA Gene       | 12 | GC08M012727 | 0.632033 | <a href="https://www.genecards.org/cgi-bin/carddisp.pl?gene=MIR3926-1">https://www.genecards.org/cgi-bin/carddisp.pl?gene=MIR3926-1</a> |
| MRPS17P7  | Mitochondrial Ribosomal Protein S17 Pseudogene 7                 | Pseudo gene    | 6  | GC18M057763 | 0.632033 | <a href="https://www.genecards.org/cgi-bin/carddisp.pl?gene=MRPS17P7">https://www.genecards.org/cgi-bin/carddisp.pl?gene=MRPS17P7</a>   |
| DAB2      | DAB Adaptor Protein 2                                            | Protein Coding | 41 | GC05M039371 | 0.622343 | <a href="https://www.genecards.org/cgi-bin/carddisp.pl?gene=DAB2">https://www.genecards.org/cgi-bin/carddisp.pl?gene=DAB2</a>           |
| MUC2      | Mucin 2, Oligomeric Mucus/Gel-Forming                            | Protein Coding | 39 | GC11P001074 | 0.622343 | <a href="https://www.genecards.org/cgi-bin/carddisp.pl?gene=MUC2">https://www.genecards.org/cgi-bin/carddisp.pl?gene=MUC2</a>           |
| MUC17     | Mucin 17, Cell Surface Associated                                | Protein Coding | 36 | GC07P101020 | 0.622343 | <a href="https://www.genecards.org/cgi-bin/carddisp.pl?gene=MUC17">https://www.genecards.org/cgi-bin/carddisp.pl?gene=MUC17</a>         |
| MUC3A     | Mucin 3A, Cell Surface Associated                                | Protein Coding | 35 | GC07P100949 | 0.622343 | <a href="https://www.genecards.org/cgi-bin/carddisp.pl?gene=MUC3A">https://www.genecards.org/cgi-bin/carddisp.pl?gene=MUC3A</a>         |
| MUC3B     | Mucin 3B, Cell Surface Associated                                | Protein Coding | 19 | GC07U903146 | 0.622343 | <a href="https://www.genecards.org/cgi-bin/carddisp.pl?gene=MUC3B">https://www.genecards.org/cgi-bin/carddisp.pl?gene=MUC3B</a>         |

|        |                                                             |                |    |             |          |                                                                                                                                          |
|--------|-------------------------------------------------------------|----------------|----|-------------|----------|------------------------------------------------------------------------------------------------------------------------------------------|
|        |                                                             |                |    |             |          | <a href="http://www.ncbi.nlm.nih.gov/ncbi/cdd/bin/carddisp.pl?gene=MUC3B">bin/carddisp.pl?gene=MUC3B</a>                                 |
| TRAF3  | TNF Receptor Associated Factor 3                            | Protein Coding | 45 | GC14P109708 | 0.606795 | <a href="http://www.ncbi.nlm.nih.gov/ncbi/cdd/bin/carddisp.pl?gene=TRAF3">https://www.genecards.org/cgi-bin/carddisp.pl?gene=TRAF3</a>   |
| PPIB   | Peptidylprolyl Isomerase B                                  | Protein Coding | 48 | GC15M064155 | 0.598059 | <a href="http://www.ncbi.nlm.nih.gov/ncbi/cdd/bin/carddisp.pl?gene=PPIB">https://www.genecards.org/cgi-bin/carddisp.pl?gene=PPIB</a>     |
| ACTB   | Actin Beta                                                  | Protein Coding | 47 | GC07M005527 | 0.598059 | <a href="http://www.ncbi.nlm.nih.gov/ncbi/cdd/bin/carddisp.pl?gene=ACTB">https://www.genecards.org/cgi-bin/carddisp.pl?gene=ACTB</a>     |
| ABCC6  | ATP Binding Cassette Subfamily C Member 6                   | Protein Coding | 45 | GC16M016148 | 0.598059 | <a href="http://www.ncbi.nlm.nih.gov/ncbi/cdd/bin/carddisp.pl?gene=ABCC6">https://www.genecards.org/cgi-bin/carddisp.pl?gene=ABCC6</a>   |
| CEBPA  | CCAAT Enhancer Binding Protein Alpha                        | Protein Coding | 45 | GC19M033299 | 0.598059 | <a href="http://www.ncbi.nlm.nih.gov/ncbi/cdd/bin/carddisp.pl?gene=CEBPA">https://www.genecards.org/cgi-bin/carddisp.pl?gene=CEBPA</a>   |
| FBLN5  | Fibulin 5                                                   | Protein Coding | 45 | GC14M091869 | 0.598059 | <a href="http://www.ncbi.nlm.nih.gov/ncbi/cdd/bin/carddisp.pl?gene=FBLN5">https://www.genecards.org/cgi-bin/carddisp.pl?gene=FBLN5</a>   |
| SCUBE3 | Signal Peptide, CUB Domain And EGF Like Domain Containing 3 | Protein Coding | 39 | GC06P083821 | 0.595897 | <a href="http://www.ncbi.nlm.nih.gov/ncbi/cdd/bin/carddisp.pl?gene=SCUBE3">https://www.genecards.org/cgi-bin/carddisp.pl?gene=SCUBE3</a> |
| CUX1   | Cut Like Homeobox 1                                         | Protein Coding | 43 | GC07P101815 | 0.594615 | <a href="http://www.ncbi.nlm.nih.gov/ncbi/cdd/bin/carddisp.pl?gene=CUX1">https://www.genecards.org/cgi-bin/carddisp.pl?gene=CUX1</a>     |
| KPNB1  | Karyopherin Subunit Beta 1                                  | Protein Coding | 42 | GC17P047649 | 0.594615 | <a href="http://www.ncbi.nlm.nih.gov/ncbi/cdd/bin/carddisp.pl?gene=KPNB1">https://www.genecards.org/cgi-bin/carddisp.pl?gene=KPNB1</a>   |
| SOX4   | SRY-Box Transcription Factor 4                              | Protein Coding | 42 | GC06P021593 | 0.594615 | <a href="http://www.ncbi.nlm.nih.gov/ncbi/cdd/bin/carddisp.pl?gene=SOX4">https://www.genecards.org/cgi-bin/carddisp.pl?gene=SOX4</a>     |
| MIP    | Major Intrinsic Protein Of Lens Fiber                       | Protein Coding | 40 | GC12M056449 | 0.594615 | <a href="http://www.ncbi.nlm.nih.gov/ncbi/cdd/bin/carddisp.pl?gene=MIP">https://www.genecards.org/cgi-bin/carddisp.pl?gene=MIP</a>       |
| BDKRB2 | Bradykinin Receptor B2                                      | Protein Coding | 43 | GC14P096205 | 0.581992 | <a href="http://www.ncbi.nlm.nih.gov/ncbi/cdd/bin/carddisp.pl?gene=BDKRB2">https://www.genecards.org/cgi-bin/carddisp.pl?gene=BDKRB2</a> |
| ITGBL1 | Integrin Subunit Beta Like 1                                | Protein Coding | 36 | GC13P101454 | 0.576676 | <a href="http://www.ncbi.nlm.nih.gov/ncbi/cdd/bin/carddisp.pl?gene=ITGBL1">https://www.genecards.org/cgi-bin/carddisp.pl?gene=ITGBL1</a> |

|        |                                                        |                |    |             |          |                                                                                                                                   |
|--------|--------------------------------------------------------|----------------|----|-------------|----------|-----------------------------------------------------------------------------------------------------------------------------------|
| ITPR1  | Inositol 1,4,5-Trisphosphate Receptor Type 1           | Protein Coding | 47 | GC03P004486 | 0.561536 | <a href="https://www.genecards.org/cgi-bin/carddisp.pl?gene=ITPR1">https://www.genecards.org/cgi-bin/carddisp.pl?gene=ITPR1</a>   |
| ATR    | ATR Serine/Threonine Kinase                            | Protein Coding | 50 | GC03M142449 | 0.55848  | <a href="https://www.genecards.org/cgi-bin/carddisp.pl?gene=ATR">https://www.genecards.org/cgi-bin/carddisp.pl?gene=ATR</a>       |
| SLC9A1 | Solute Carrier Family 9 Member A1                      | Protein Coding | 49 | GC01M027135 | 0.55848  | <a href="https://www.genecards.org/cgi-bin/carddisp.pl?gene=SLC9A1">https://www.genecards.org/cgi-bin/carddisp.pl?gene=SLC9A1</a> |
| PHGDH  | Phosphoglycerate Dehydrogenase                         | Protein Coding | 48 | GC01P119660 | 0.55848  | <a href="https://www.genecards.org/cgi-bin/carddisp.pl?gene=PHGDH">https://www.genecards.org/cgi-bin/carddisp.pl?gene=PHGDH</a>   |
| SCNN1B | Sodium Channel Epithelial 1 Subunit Beta               | Protein Coding | 48 | GC16P023278 | 0.55848  | <a href="https://www.genecards.org/cgi-bin/carddisp.pl?gene=SCNN1B">https://www.genecards.org/cgi-bin/carddisp.pl?gene=SCNN1B</a> |
| ESRRB  | Estrogen Related Receptor Beta                         | Protein Coding | 47 | GC14P076310 | 0.55848  | <a href="https://www.genecards.org/cgi-bin/carddisp.pl?gene=ESRRB">https://www.genecards.org/cgi-bin/carddisp.pl?gene=ESRRB</a>   |
| RARA   | Retinoic Acid Receptor Alpha                           | Protein Coding | 47 | GC17P040309 | 0.55848  | <a href="https://www.genecards.org/cgi-bin/carddisp.pl?gene=RARA">https://www.genecards.org/cgi-bin/carddisp.pl?gene=RARA</a>     |
| CHAT   | Choline O-Acetyltransferase                            | Protein Coding | 46 | GC10P049609 | 0.55848  | <a href="https://www.genecards.org/cgi-bin/carddisp.pl?gene=CHAT">https://www.genecards.org/cgi-bin/carddisp.pl?gene=CHAT</a>     |
| GLUL   | Glutamate-Ammonia Ligase                               | Protein Coding | 46 | GC01M182378 | 0.55848  | <a href="https://www.genecards.org/cgi-bin/carddisp.pl?gene=GLUL">https://www.genecards.org/cgi-bin/carddisp.pl?gene=GLUL</a>     |
| KAT2B  | Lysine Acetyltransferase 2B                            | Protein Coding | 46 | GC03P020043 | 0.55848  | <a href="https://www.genecards.org/cgi-bin/carddisp.pl?gene=KAT2B">https://www.genecards.org/cgi-bin/carddisp.pl?gene=KAT2B</a>   |
| SDHA   | Succinate Dehydrogenase Complex Flavoprotein Subunit A | Protein Coding | 46 | GC05P000208 | 0.55848  | <a href="https://www.genecards.org/cgi-bin/carddisp.pl?gene=SDHA">https://www.genecards.org/cgi-bin/carddisp.pl?gene=SDHA</a>     |
| DRD5   | Dopamine Receptor D5                                   | Protein Coding | 45 | GC04P009783 | 0.55848  | <a href="https://www.genecards.org/cgi-bin/carddisp.pl?gene=DRD5">https://www.genecards.org/cgi-bin/carddisp.pl?gene=DRD5</a>     |
| MYCN   | MYCN Proto-Oncogene, BHLH Transcription Factor         | Protein Coding | 45 | GC02P015949 | 0.55848  | <a href="https://www.genecards.org/cgi-bin/carddisp.pl?gene=MYCN">https://www.genecards.org/cgi-bin/carddisp.pl?gene=MYCN</a>     |
| CBLB   | Cbl Proto-Oncogene B                                   | Protein Coding | 44 | GC03M105655 | 0.55848  | <a href="https://www.genecards.org/cgi-bin/carddisp.pl?gene=CBLB">https://www.genecards.org/cgi-bin/carddisp.pl?gene=CBLB</a>     |

|          |                                                               |                |    |             |         |                                                                                                                                              |
|----------|---------------------------------------------------------------|----------------|----|-------------|---------|----------------------------------------------------------------------------------------------------------------------------------------------|
|          |                                                               |                |    |             |         | <a href="http://www.ncbi.nlm.nih.gov/ncbi/cdd/bin/carddisp.pl?gene=CBLB">bin/carddisp.pl?gene=CBLB</a>                                       |
| DOT1L    | DOT1 Like Histone Lysine Methyltransferase                    | Protein Coding | 44 | GC19P002935 | 0.55848 | <a href="http://www.ncbi.nlm.nih.gov/ncbi/cdd/bin/carddisp.pl?gene=DOT1L">https://www.genecards.org/cgi-bin/carddisp.pl?gene=DOT1L</a>       |
| EIF4EBP1 | Eukaryotic Translation Initiation Factor 4E Binding Protein 1 | Protein Coding | 44 | GC08P038469 | 0.55848 | <a href="http://www.ncbi.nlm.nih.gov/ncbi/cdd/bin/carddisp.pl?gene=EIF4EBP1">https://www.genecards.org/cgi-bin/carddisp.pl?gene=EIF4EBP1</a> |
| F2RL3    | F2R Like Thrombin Or Trypsin Receptor 3                       | Protein Coding | 44 | GC19P016888 | 0.55848 | <a href="http://www.ncbi.nlm.nih.gov/ncbi/cdd/bin/carddisp.pl?gene=F2RL3">https://www.genecards.org/cgi-bin/carddisp.pl?gene=F2RL3</a>       |
| GJA8     | Gap Junction Protein Alpha 8                                  | Protein Coding | 44 | GC01P147902 | 0.55848 | <a href="http://www.ncbi.nlm.nih.gov/ncbi/cdd/bin/carddisp.pl?gene=GJA8">https://www.genecards.org/cgi-bin/carddisp.pl?gene=GJA8</a>         |
| KLF4     | Kruppel Like Factor 4                                         | Protein Coding | 44 | GC09M107484 | 0.55848 | <a href="http://www.ncbi.nlm.nih.gov/ncbi/cdd/bin/carddisp.pl?gene=KLF4">https://www.genecards.org/cgi-bin/carddisp.pl?gene=KLF4</a>         |
| PSMA7    | Proteasome 20S Subunit Alpha 7                                | Protein Coding | 44 | GC20M062136 | 0.55848 | <a href="http://www.ncbi.nlm.nih.gov/ncbi/cdd/bin/carddisp.pl?gene=PSMA7">https://www.genecards.org/cgi-bin/carddisp.pl?gene=PSMA7</a>       |
| CCT5     | Chaperonin Containing TCP1 Subunit 5                          | Protein Coding | 43 | GC05P010236 | 0.55848 | <a href="http://www.ncbi.nlm.nih.gov/ncbi/cdd/bin/carddisp.pl?gene=CCT5">https://www.genecards.org/cgi-bin/carddisp.pl?gene=CCT5</a>         |
| COL4A6   | Collagen Type IV Alpha 6 Chain                                | Protein Coding | 43 | GC0XM108155 | 0.55848 | <a href="http://www.ncbi.nlm.nih.gov/ncbi/cdd/bin/carddisp.pl?gene=COL4A6">https://www.genecards.org/cgi-bin/carddisp.pl?gene=COL4A6</a>     |
| RUVBL2   | RuvB Like AAA ATPase 2                                        | Protein Coding | 43 | GC19P048993 | 0.55848 | <a href="http://www.ncbi.nlm.nih.gov/ncbi/cdd/bin/carddisp.pl?gene=RUVBL2">https://www.genecards.org/cgi-bin/carddisp.pl?gene=RUVBL2</a>     |
| ACP2     | Acid Phosphatase 2, Lysosomal                                 | Protein Coding | 42 | GC11M089360 | 0.55848 | <a href="http://www.ncbi.nlm.nih.gov/ncbi/cdd/bin/carddisp.pl?gene=ACP2">https://www.genecards.org/cgi-bin/carddisp.pl?gene=ACP2</a>         |
| ATP6AP1  | ATPase H <sup>+</sup> Transporting Accessory Protein 1        | Protein Coding | 42 | GC0XP154428 | 0.55848 | <a href="http://www.ncbi.nlm.nih.gov/ncbi/cdd/bin/carddisp.pl?gene=ATP6AP1">https://www.genecards.org/cgi-bin/carddisp.pl?gene=ATP6AP1</a>   |
| ATP6V0D1 | ATPase H <sup>+</sup> Transporting V0 Subunit D1              | Protein Coding | 42 | GC16M067438 | 0.55848 | <a href="http://www.ncbi.nlm.nih.gov/ncbi/cdd/bin/carddisp.pl?gene=ATP6V0D1">https://www.genecards.org/cgi-bin/carddisp.pl?gene=ATP6V0D1</a> |
| ERLIN1   | ER Lipid Raft Associated 1                                    | Protein Coding | 42 | GC10M100150 | 0.55848 | <a href="http://www.ncbi.nlm.nih.gov/ncbi/cdd/bin/carddisp.pl?gene=ERLIN1">https://www.genecards.org/cgi-bin/carddisp.pl?gene=ERLIN1</a>     |



|        |                                                             |                |    |             |         |                                                                                                                                   |
|--------|-------------------------------------------------------------|----------------|----|-------------|---------|-----------------------------------------------------------------------------------------------------------------------------------|
| KDM6B  | Lysine Demethylase 6B                                       | Protein Coding | 42 | GC17P007834 | 0.55848 | <a href="https://www.genecards.org/cgi-bin/carddisp.pl?gene=KDM6B">https://www.genecards.org/cgi-bin/carddisp.pl?gene=KDM6B</a>   |
| LAMA5  | Laminin Subunit Alpha 5                                     | Protein Coding | 42 | GC20M062307 | 0.55848 | <a href="https://www.genecards.org/cgi-bin/carddisp.pl?gene=LAMA5">https://www.genecards.org/cgi-bin/carddisp.pl?gene=LAMA5</a>   |
| LGR5   | Leucine Rich Repeat Containing G Protein-Coupled Receptor 5 | Protein Coding | 42 | GC12P071439 | 0.55848 | <a href="https://www.genecards.org/cgi-bin/carddisp.pl?gene=LGR5">https://www.genecards.org/cgi-bin/carddisp.pl?gene=LGR5</a>     |
| NMT1   | N-Myristoyltransferase 1                                    | Protein Coding | 42 | GC17P055763 | 0.55848 | <a href="https://www.genecards.org/cgi-bin/carddisp.pl?gene=NMT1">https://www.genecards.org/cgi-bin/carddisp.pl?gene=NMT1</a>     |
| PSMA1  | Proteasome 20S Subunit Alpha 1                              | Protein Coding | 42 | GC11M014505 | 0.55848 | <a href="https://www.genecards.org/cgi-bin/carddisp.pl?gene=PSMA1">https://www.genecards.org/cgi-bin/carddisp.pl?gene=PSMA1</a>   |
| PSMA5  | Proteasome 20S Subunit Alpha 5                              | Protein Coding | 42 | GC01M109399 | 0.55848 | <a href="https://www.genecards.org/cgi-bin/carddisp.pl?gene=PSMA5">https://www.genecards.org/cgi-bin/carddisp.pl?gene=PSMA5</a>   |
| RPS20  | Ribosomal Protein S20                                       | Protein Coding | 42 | GC08M056067 | 0.55848 | <a href="https://www.genecards.org/cgi-bin/carddisp.pl?gene=RPS20">https://www.genecards.org/cgi-bin/carddisp.pl?gene=RPS20</a>   |
| TREM2  | Triggering Receptor Expressed On Myeloid Cells 2            | Protein Coding | 42 | GC06M066157 | 0.55848 | <a href="https://www.genecards.org/cgi-bin/carddisp.pl?gene=TREM2">https://www.genecards.org/cgi-bin/carddisp.pl?gene=TREM2</a>   |
| UBE2D2 | Ubiquitin Conjugating Enzyme E2 D2                          | Protein Coding | 42 | GC05P139526 | 0.55848 | <a href="https://www.genecards.org/cgi-bin/carddisp.pl?gene=UBE2D2">https://www.genecards.org/cgi-bin/carddisp.pl?gene=UBE2D2</a> |
| EXOSC2 | Exosome Component 2                                         | Protein Coding | 41 | GC09P130693 | 0.55848 | <a href="https://www.genecards.org/cgi-bin/carddisp.pl?gene=EXOSC2">https://www.genecards.org/cgi-bin/carddisp.pl?gene=EXOSC2</a> |
| GALE   | UDP-Galactose-4-Epimerase                                   | Protein Coding | 41 | GC01M023795 | 0.55848 | <a href="https://www.genecards.org/cgi-bin/carddisp.pl?gene=GALE">https://www.genecards.org/cgi-bin/carddisp.pl?gene=GALE</a>     |
| GNB2   | G Protein Subunit Beta 2                                    | Protein Coding | 41 | GC07P100673 | 0.55848 | <a href="https://www.genecards.org/cgi-bin/carddisp.pl?gene=GNB2">https://www.genecards.org/cgi-bin/carddisp.pl?gene=GNB2</a>     |
| GRPR   | Gastrin Releasing Peptide Receptor                          | Protein Coding | 41 | GC0XP016141 | 0.55848 | <a href="https://www.genecards.org/cgi-bin/carddisp.pl?gene=GRPR">https://www.genecards.org/cgi-bin/carddisp.pl?gene=GRPR</a>     |
| HAX1   | HCLS1 Associated Protein X-1                                | Protein Coding | 41 | GC01P154273 | 0.55848 | <a href="https://www.genecards.org/cgi-">https://www.genecards.org/cgi-</a>                                                       |

|        |                                                     |                |    |             |         |                                                                                                                                          |
|--------|-----------------------------------------------------|----------------|----|-------------|---------|------------------------------------------------------------------------------------------------------------------------------------------|
|        |                                                     |                |    |             |         | <a href="http://www.ncbi.nlm.nih.gov/ncbi/cdd/bin/carddisp.pl?gene=HAX1">bin/carddisp.pl?gene=HAX1</a>                                   |
| HNRNPU | Heterogeneous Nuclear Ribonucleoprotein U           | Protein Coding | 41 | GC01M244844 | 0.55848 | <a href="http://www.ncbi.nlm.nih.gov/ncbi/cdd/bin/carddisp.pl?gene=HNRNPU">https://www.genecards.org/cgi-bin/carddisp.pl?gene=HNRNPU</a> |
| INHA   | Inhibin Subunit Alpha                               | Protein Coding | 41 | GC02P219569 | 0.55848 | <a href="http://www.ncbi.nlm.nih.gov/ncbi/cdd/bin/carddisp.pl?gene=INHA">https://www.genecards.org/cgi-bin/carddisp.pl?gene=INHA</a>     |
| KLF6   | Kruppel Like Factor 6                               | Protein Coding | 41 | GC10M003779 | 0.55848 | <a href="http://www.ncbi.nlm.nih.gov/ncbi/cdd/bin/carddisp.pl?gene=KLF6">https://www.genecards.org/cgi-bin/carddisp.pl?gene=KLF6</a>     |
| MATR3  | Matrin 3                                            | Protein Coding | 41 | GC05P139274 | 0.55848 | <a href="http://www.ncbi.nlm.nih.gov/ncbi/cdd/bin/carddisp.pl?gene=MATR3">https://www.genecards.org/cgi-bin/carddisp.pl?gene=MATR3</a>   |
| PSMA2  | Proteasome 20S Subunit Alpha 2                      | Protein Coding | 41 | GC07M042916 | 0.55848 | <a href="http://www.ncbi.nlm.nih.gov/ncbi/cdd/bin/carddisp.pl?gene=PSMA2">https://www.genecards.org/cgi-bin/carddisp.pl?gene=PSMA2</a>   |
| PSMB6  | Proteasome 20S Subunit Beta 6                       | Protein Coding | 41 | GC17P004796 | 0.55848 | <a href="http://www.ncbi.nlm.nih.gov/ncbi/cdd/bin/carddisp.pl?gene=PSMB6">https://www.genecards.org/cgi-bin/carddisp.pl?gene=PSMB6</a>   |
| RBCK1  | RANBP2-Type And C3HC4-Type Zinc Finger Containing 1 | Protein Coding | 41 | GC20P000407 | 0.55848 | <a href="http://www.ncbi.nlm.nih.gov/ncbi/cdd/bin/carddisp.pl?gene=RBCK1">https://www.genecards.org/cgi-bin/carddisp.pl?gene=RBCK1</a>   |
| BNIP3L | BCL2 Interacting Protein 3 Like                     | Protein Coding | 40 | GC08P026383 | 0.55848 | <a href="http://www.ncbi.nlm.nih.gov/ncbi/cdd/bin/carddisp.pl?gene=BNIP3L">https://www.genecards.org/cgi-bin/carddisp.pl?gene=BNIP3L</a> |
| CDO1   | Cysteine Dioxygenase Type 1                         | Protein Coding | 40 | GC05M115804 | 0.55848 | <a href="http://www.ncbi.nlm.nih.gov/ncbi/cdd/bin/carddisp.pl?gene=CDO1">https://www.genecards.org/cgi-bin/carddisp.pl?gene=CDO1</a>     |
| DEF6   | DEF6 Guanine Nucleotide Exchange Factor             | Protein Coding | 40 | GC06P083820 | 0.55848 | <a href="http://www.ncbi.nlm.nih.gov/ncbi/cdd/bin/carddisp.pl?gene=DEF6">https://www.genecards.org/cgi-bin/carddisp.pl?gene=DEF6</a>     |
| FHL3   | Four And A Half LIM Domains 3                       | Protein Coding | 40 | GC01M038118 | 0.55848 | <a href="http://www.ncbi.nlm.nih.gov/ncbi/cdd/bin/carddisp.pl?gene=FHL3">https://www.genecards.org/cgi-bin/carddisp.pl?gene=FHL3</a>     |
| KPNA1  | Karyopherin Subunit Alpha 1                         | Protein Coding | 40 | GC03M122421 | 0.55848 | <a href="http://www.ncbi.nlm.nih.gov/ncbi/cdd/bin/carddisp.pl?gene=KPNA1">https://www.genecards.org/cgi-bin/carddisp.pl?gene=KPNA1</a>   |
| MTCH2  | Mitochondrial Carrier 2                             | Protein Coding | 40 | GC11M047604 | 0.55848 | <a href="http://www.ncbi.nlm.nih.gov/ncbi/cdd/bin/carddisp.pl?gene=MTCH2">https://www.genecards.org/cgi-bin/carddisp.pl?gene=MTCH2</a>   |

|         |                                            |                |    |             |         |                                                                                                                                     |
|---------|--------------------------------------------|----------------|----|-------------|---------|-------------------------------------------------------------------------------------------------------------------------------------|
| MUC4    | Mucin 4, Cell Surface Associated           | Protein Coding | 40 | GC03M195746 | 0.55848 | <a href="https://www.genecards.org/cgi-bin/carddisp.pl?gene=MUC4">https://www.genecards.org/cgi-bin/carddisp.pl?gene=MUC4</a>       |
| NADSYN1 | NAD Synthetase 1                           | Protein Coding | 40 | GC11P071454 | 0.55848 | <a href="https://www.genecards.org/cgi-bin/carddisp.pl?gene=NADSYN1">https://www.genecards.org/cgi-bin/carddisp.pl?gene=NADSYN1</a> |
| RANBP9  | RAN Binding Protein 9                      | Protein Coding | 40 | GC06M013621 | 0.55848 | <a href="https://www.genecards.org/cgi-bin/carddisp.pl?gene=RANBP9">https://www.genecards.org/cgi-bin/carddisp.pl?gene=RANBP9</a>   |
| RNF31   | Ring Finger Protein 31                     | Protein Coding | 40 | GC14P024146 | 0.55848 | <a href="https://www.genecards.org/cgi-bin/carddisp.pl?gene=RNF31">https://www.genecards.org/cgi-bin/carddisp.pl?gene=RNF31</a>     |
| SLC9A2  | Solute Carrier Family 9 Member A2          | Protein Coding | 40 | GC02P102620 | 0.55848 | <a href="https://www.genecards.org/cgi-bin/carddisp.pl?gene=SLC9A2">https://www.genecards.org/cgi-bin/carddisp.pl?gene=SLC9A2</a>   |
| UCK2    | Uridine-Cytidine Kinase 2                  | Protein Coding | 40 | GC01P165796 | 0.55848 | <a href="https://www.genecards.org/cgi-bin/carddisp.pl?gene=UCK2">https://www.genecards.org/cgi-bin/carddisp.pl?gene=UCK2</a>       |
| UNC13B  | Unc-13 Homolog B                           | Protein Coding | 40 | GC09P035161 | 0.55848 | <a href="https://www.genecards.org/cgi-bin/carddisp.pl?gene=UNC13B">https://www.genecards.org/cgi-bin/carddisp.pl?gene=UNC13B</a>   |
| CD93    | CD93 Molecule                              | Protein Coding | 39 | GC20M023079 | 0.55848 | <a href="https://www.genecards.org/cgi-bin/carddisp.pl?gene=CD93">https://www.genecards.org/cgi-bin/carddisp.pl?gene=CD93</a>       |
| DDX17   | DEAD-Box Helicase 17                       | Protein Coding | 39 | GC22M038483 | 0.55848 | <a href="https://www.genecards.org/cgi-bin/carddisp.pl?gene=DDX17">https://www.genecards.org/cgi-bin/carddisp.pl?gene=DDX17</a>     |
| GP5     | Glycoprotein V Platelet                    | Protein Coding | 39 | GC03M194395 | 0.55848 | <a href="https://www.genecards.org/cgi-bin/carddisp.pl?gene=GP5">https://www.genecards.org/cgi-bin/carddisp.pl?gene=GP5</a>         |
| GTF2F1  | General Transcription Factor IIF Subunit 1 | Protein Coding | 39 | GC19M006417 | 0.55848 | <a href="https://www.genecards.org/cgi-bin/carddisp.pl?gene=GTF2F1">https://www.genecards.org/cgi-bin/carddisp.pl?gene=GTF2F1</a>   |
| LCN1    | Lipocalin 1                                | Protein Coding | 39 | GC09P135521 | 0.55848 | <a href="https://www.genecards.org/cgi-bin/carddisp.pl?gene=LCN1">https://www.genecards.org/cgi-bin/carddisp.pl?gene=LCN1</a>       |
| MOV10   | Mov10 RISC Complex RNA Helicase            | Protein Coding | 39 | GC01P112673 | 0.55848 | <a href="https://www.genecards.org/cgi-bin/carddisp.pl?gene=MOV10">https://www.genecards.org/cgi-bin/carddisp.pl?gene=MOV10</a>     |
| SHARPIN | SHANK Associated RH Domain Interactor      | Protein Coding | 39 | GC08M144098 | 0.55848 | <a href="https://www.genecards.org/cgi-">https://www.genecards.org/cgi-</a>                                                         |

|         |                                                       |                |    |             |         |                                                                                                                                     |
|---------|-------------------------------------------------------|----------------|----|-------------|---------|-------------------------------------------------------------------------------------------------------------------------------------|
|         |                                                       |                |    |             |         | <a href="#">bin/carddisp.pl?gene=SHARPIN</a>                                                                                        |
| UBR2    | Ubiquitin Protein Ligase E3 Component N-Recognin 2    | Protein Coding | 39 | GC06P083911 | 0.55848 | <a href="https://www.genecards.org/cgi-bin/carddisp.pl?gene=UBR2">https://www.genecards.org/cgi-bin/carddisp.pl?gene=UBR2</a>       |
| ARID3A  | AT-Rich Interaction Domain 3A                         | Protein Coding | 38 | GC19P002812 | 0.55848 | <a href="https://www.genecards.org/cgi-bin/carddisp.pl?gene=ARID3A">https://www.genecards.org/cgi-bin/carddisp.pl?gene=ARID3A</a>   |
| BAG2    | BAG Cochaperone 2                                     | Protein Coding | 38 | GC06P057172 | 0.55848 | <a href="https://www.genecards.org/cgi-bin/carddisp.pl?gene=BAG2">https://www.genecards.org/cgi-bin/carddisp.pl?gene=BAG2</a>       |
| HNRNPF  | Heterogeneous Nuclear Ribonucleoprotein F             | Protein Coding | 38 | GC10M043385 | 0.55848 | <a href="https://www.genecards.org/cgi-bin/carddisp.pl?gene=HNRNPF">https://www.genecards.org/cgi-bin/carddisp.pl?gene=HNRNPF</a>   |
| HNRNPH1 | Heterogeneous Nuclear Ribonucleoprotein H1            | Protein Coding | 38 | GC05M179614 | 0.55848 | <a href="https://www.genecards.org/cgi-bin/carddisp.pl?gene=HNRNPH1">https://www.genecards.org/cgi-bin/carddisp.pl?gene=HNRNPH1</a> |
| HNRNPR  | Heterogeneous Nuclear Ribonucleoprotein R             | Protein Coding | 38 | GC01M023303 | 0.55848 | <a href="https://www.genecards.org/cgi-bin/carddisp.pl?gene=HNRNPR">https://www.genecards.org/cgi-bin/carddisp.pl?gene=HNRNPR</a>   |
| HSPA14  | Heat Shock Protein Family A (Hsp70) Member 14         | Protein Coding | 38 | GC10P014858 | 0.55848 | <a href="https://www.genecards.org/cgi-bin/carddisp.pl?gene=HSPA14">https://www.genecards.org/cgi-bin/carddisp.pl?gene=HSPA14</a>   |
| IPO7    | Importin 7                                            | Protein Coding | 38 | GC11P009384 | 0.55848 | <a href="https://www.genecards.org/cgi-bin/carddisp.pl?gene=IPO7">https://www.genecards.org/cgi-bin/carddisp.pl?gene=IPO7</a>       |
| RPS11   | Ribosomal Protein S11                                 | Protein Coding | 38 | GC19P049496 | 0.55848 | <a href="https://www.genecards.org/cgi-bin/carddisp.pl?gene=RPS11">https://www.genecards.org/cgi-bin/carddisp.pl?gene=RPS11</a>     |
| RPS8    | Ribosomal Protein S8                                  | Protein Coding | 38 | GC01P044775 | 0.55848 | <a href="https://www.genecards.org/cgi-bin/carddisp.pl?gene=RPS8">https://www.genecards.org/cgi-bin/carddisp.pl?gene=RPS8</a>       |
| ALDOC   | Aldolase, Fructose-Bisphosphate C                     | Protein Coding | 37 | GC17M035139 | 0.55848 | <a href="https://www.genecards.org/cgi-bin/carddisp.pl?gene=ALDOC">https://www.genecards.org/cgi-bin/carddisp.pl?gene=ALDOC</a>     |
| MAEA    | Macrophage Erythroblast Attacher, E3 Ubiquitin Ligase | Protein Coding | 37 | GC04P001289 | 0.55848 | <a href="https://www.genecards.org/cgi-bin/carddisp.pl?gene=MAEA">https://www.genecards.org/cgi-bin/carddisp.pl?gene=MAEA</a>       |
| PCDH18  | Protocadherin 18                                      | Protein Coding | 37 | GC04M137518 | 0.55848 | <a href="https://www.genecards.org/cgi-bin/carddisp.pl?gene=PCDH18">https://www.genecards.org/cgi-bin/carddisp.pl?gene=PCDH18</a>   |

|          |                                                                  |                |    |             |         |                                                                                                                                       |
|----------|------------------------------------------------------------------|----------------|----|-------------|---------|---------------------------------------------------------------------------------------------------------------------------------------|
| SH3RF1   | SH3 Domain Containing Ring Finger 1                              | Protein Coding | 37 | GC04M169094 | 0.55848 | <a href="https://www.genecards.org/cgi-bin/carddisp.pl?gene=SH3RF1">https://www.genecards.org/cgi-bin/carddisp.pl?gene=SH3RF1</a>     |
| SLA      | Src Like Adaptor                                                 | Protein Coding | 37 | GC08M133040 | 0.55848 | <a href="https://www.genecards.org/cgi-bin/carddisp.pl?gene=SLA">https://www.genecards.org/cgi-bin/carddisp.pl?gene=SLA</a>           |
| STOM     | Stomatin                                                         | Protein Coding | 37 | GC09M121338 | 0.55848 | <a href="https://www.genecards.org/cgi-bin/carddisp.pl?gene=STOM">https://www.genecards.org/cgi-bin/carddisp.pl?gene=STOM</a>         |
| ARID5A   | AT-Rich Interaction Domain 5A                                    | Protein Coding | 36 | GC02P096536 | 0.55848 | <a href="https://www.genecards.org/cgi-bin/carddisp.pl?gene=ARID5A">https://www.genecards.org/cgi-bin/carddisp.pl?gene=ARID5A</a>     |
| ATP5F1A  | ATP Synthase F1 Subunit Alpha                                    | Protein Coding | 36 | GC18M046081 | 0.55848 | <a href="https://www.genecards.org/cgi-bin/carddisp.pl?gene=ATP5F1A">https://www.genecards.org/cgi-bin/carddisp.pl?gene=ATP5F1A</a>   |
| HS3ST3A1 | Heparan Sulfate-Glucosamine 3-Sulfotransferase 3A1               | Protein Coding | 36 | GC17M013494 | 0.55848 | <a href="https://www.genecards.org/cgi-bin/carddisp.pl?gene=HS3ST3A1">https://www.genecards.org/cgi-bin/carddisp.pl?gene=HS3ST3A1</a> |
| LAS1L    | LAS1 Like Ribosome Biogenesis Factor                             | Protein Coding | 36 | GC0XM065440 | 0.55848 | <a href="https://www.genecards.org/cgi-bin/carddisp.pl?gene=LAS1L">https://www.genecards.org/cgi-bin/carddisp.pl?gene=LAS1L</a>       |
| MYCL     | MYCL Proto-Oncogene, BHLH Transcription Factor                   | Protein Coding | 36 | GC01M039895 | 0.55848 | <a href="https://www.genecards.org/cgi-bin/carddisp.pl?gene=MYCL">https://www.genecards.org/cgi-bin/carddisp.pl?gene=MYCL</a>         |
| NASP     | Nuclear Autoantigenic Sperm Protein                              | Protein Coding | 36 | GC01P045583 | 0.55848 | <a href="https://www.genecards.org/cgi-bin/carddisp.pl?gene=NASP">https://www.genecards.org/cgi-bin/carddisp.pl?gene=NASP</a>         |
| RNF25    | Ring Finger Protein 25                                           | Protein Coding | 36 | GC02M218663 | 0.55848 | <a href="https://www.genecards.org/cgi-bin/carddisp.pl?gene=RNF25">https://www.genecards.org/cgi-bin/carddisp.pl?gene=RNF25</a>       |
| SGTA     | Small Glutamine Rich Tetratricopeptide Repeat Co-Chaperone Alpha | Protein Coding | 36 | GC19M002754 | 0.55848 | <a href="https://www.genecards.org/cgi-bin/carddisp.pl?gene=SGTA">https://www.genecards.org/cgi-bin/carddisp.pl?gene=SGTA</a>         |
| LRTM1    | Leucine Rich Repeats And Transmembrane Domains 1                 | Protein Coding | 35 | GC03M054928 | 0.55848 | <a href="https://www.genecards.org/cgi-bin/carddisp.pl?gene=LRTM1">https://www.genecards.org/cgi-bin/carddisp.pl?gene=LRTM1</a>       |
| TBCC     | Tubulin Folding Cofactor C                                       | Protein Coding | 35 | GC06M042744 | 0.55848 | <a href="https://www.genecards.org/cgi-bin/carddisp.pl?gene=TBCC">https://www.genecards.org/cgi-bin/carddisp.pl?gene=TBCC</a>         |
| CCNDBP1  | Cyclin D1 Binding Protein 1                                      | Protein Coding | 34 | GC15P043185 | 0.55848 | <a href="https://www.genecards.org/cgi-">https://www.genecards.org/cgi-</a>                                                           |

|         |                                                     |                |    |             |         |                                                                                                                                  |
|---------|-----------------------------------------------------|----------------|----|-------------|---------|----------------------------------------------------------------------------------------------------------------------------------|
|         |                                                     |                |    |             |         | <a href="http://www.ncbi.nlm.nih.gov/ncbi/cdd/cdddisp.pl?gene=CCNDBP1">bin/cdddisp.pl?gene=CCNDBP1</a>                           |
| SUGP1   | SURP And G-Patch Domain Containing 1                | Protein Coding | 34 | GC19M019276 | 0.55848 | <a href="http://www.genecards.org/cgi-bin/cdddisp.pl?gene=SUGP1">https://www.genecards.org/cgi-bin/cdddisp.pl?gene=SUGP1</a>     |
| UBL4A   | Ubiquitin Like 4A                                   | Protein Coding | 34 | GC0XM154483 | 0.55848 | <a href="http://www.genecards.org/cgi-bin/cdddisp.pl?gene=UBL4A">https://www.genecards.org/cgi-bin/cdddisp.pl?gene=UBL4A</a>     |
| PCID2   | PCI Domain Containing 2                             | Protein Coding | 33 | GC13M113167 | 0.55848 | <a href="http://www.genecards.org/cgi-bin/cdddisp.pl?gene=PCID2">https://www.genecards.org/cgi-bin/cdddisp.pl?gene=PCID2</a>     |
| GRWD1   | Glutamate Rich WD Repeat Containing 1               | Protein Coding | 32 | GC19P048445 | 0.55848 | <a href="http://www.genecards.org/cgi-bin/cdddisp.pl?gene=GRWD1">https://www.genecards.org/cgi-bin/cdddisp.pl?gene=GRWD1</a>     |
| SPART   | Spartin                                             | Protein Coding | 32 | GC13M036687 | 0.55848 | <a href="http://www.genecards.org/cgi-bin/cdddisp.pl?gene=SPART">https://www.genecards.org/cgi-bin/cdddisp.pl?gene=SPART</a>     |
| M1AP    | Meiosis 1 Associated Protein                        | Protein Coding | 31 | GC02M074557 | 0.55848 | <a href="http://www.genecards.org/cgi-bin/cdddisp.pl?gene=M1AP">https://www.genecards.org/cgi-bin/cdddisp.pl?gene=M1AP</a>       |
| CLECL1  | C-Type Lectin Like 1                                | Pseudo gene    | 30 | GC12M021099 | 0.55848 | <a href="http://www.genecards.org/cgi-bin/cdddisp.pl?gene=CLECL1">https://www.genecards.org/cgi-bin/cdddisp.pl?gene=CLECL1</a>   |
| KRBOX4  | KRAB Box Domain Containing 4                        | Protein Coding | 30 | GC0XP046587 | 0.55848 | <a href="http://www.genecards.org/cgi-bin/cdddisp.pl?gene=KRBOX4">https://www.genecards.org/cgi-bin/cdddisp.pl?gene=KRBOX4</a>   |
| CLEC2A  | C-Type Lectin Domain Family 2 Member A              | Protein Coding | 29 | GC12M021101 | 0.55848 | <a href="http://www.genecards.org/cgi-bin/cdddisp.pl?gene=CLEC2A">https://www.genecards.org/cgi-bin/cdddisp.pl?gene=CLEC2A</a>   |
| MTARC1  | Mitochondrial Amidoxime Reducing Component 1        | Protein Coding | 26 | GC01P220788 | 0.55848 | <a href="http://www.genecards.org/cgi-bin/cdddisp.pl?gene=MTARC1">https://www.genecards.org/cgi-bin/cdddisp.pl?gene=MTARC1</a>   |
| AARD    | Alanine And Arginine Rich Domain Containing Protein | Protein Coding | 25 | GC08P116938 | 0.55848 | <a href="http://www.genecards.org/cgi-bin/cdddisp.pl?gene=AARD">https://www.genecards.org/cgi-bin/cdddisp.pl?gene=AARD</a>       |
| MIR595  | MicroRNA 595                                        | RNA Gene       | 17 | GC07M158532 | 0.55848 | <a href="http://www.genecards.org/cgi-bin/cdddisp.pl?gene=MIR595">https://www.genecards.org/cgi-bin/cdddisp.pl?gene=MIR595</a>   |
| MIR1908 | MicroRNA 1908                                       | RNA Gene       | 16 | GC11M061815 | 0.55848 | <a href="http://www.genecards.org/cgi-bin/cdddisp.pl?gene=MIR1908">https://www.genecards.org/cgi-bin/cdddisp.pl?gene=MIR1908</a> |

|           |                                                                        |                |    |             |         |                                                                                                                                         |
|-----------|------------------------------------------------------------------------|----------------|----|-------------|---------|-----------------------------------------------------------------------------------------------------------------------------------------|
| NR2F2-AS1 | NR2F2 Antisense RNA 1                                                  | RNA Gene       | 16 | GC15M117279 | 0.55848 | <a href="https://www.genecards.org/cgi-bin/carddisp.pl?gene=NR2F2-AS1">https://www.genecards.org/cgi-bin/carddisp.pl?gene=NR2F2-AS1</a> |
| TRBV19    | T Cell Receptor Beta Variable 19                                       | Protein Coding | 16 | GC07P148316 | 0.55848 | <a href="https://www.genecards.org/cgi-bin/carddisp.pl?gene=TRBV19">https://www.genecards.org/cgi-bin/carddisp.pl?gene=TRBV19</a>       |
| MIR3614   | MicroRNA 3614                                                          | RNA Gene       | 14 | GC17M056891 | 0.55848 | <a href="https://www.genecards.org/cgi-bin/carddisp.pl?gene=MIR3614">https://www.genecards.org/cgi-bin/carddisp.pl?gene=MIR3614</a>     |
| MIR1246   | MicroRNA 1246                                                          | RNA Gene       | 13 | GC02M176600 | 0.55848 | <a href="https://www.genecards.org/cgi-bin/carddisp.pl?gene=MIR1246">https://www.genecards.org/cgi-bin/carddisp.pl?gene=MIR1246</a>     |
| MIR1972-2 | MicroRNA 1972-2                                                        | RNA Gene       | 13 | GC16P070030 | 0.55848 | <a href="https://www.genecards.org/cgi-bin/carddisp.pl?gene=MIR1972-2">https://www.genecards.org/cgi-bin/carddisp.pl?gene=MIR1972-2</a> |
| MIR5100   | MicroRNA 5100                                                          | RNA Gene       | 13 | GC10P043180 | 0.55848 | <a href="https://www.genecards.org/cgi-bin/carddisp.pl?gene=MIR5100">https://www.genecards.org/cgi-bin/carddisp.pl?gene=MIR5100</a>     |
| MIR1972-1 | MicroRNA 1972-1                                                        | RNA Gene       | 12 | GC16M015697 | 0.55848 | <a href="https://www.genecards.org/cgi-bin/carddisp.pl?gene=MIR1972-1">https://www.genecards.org/cgi-bin/carddisp.pl?gene=MIR1972-1</a> |
| MIR371B   | MicroRNA 371b                                                          | RNA Gene       | 12 | GC19M053787 | 0.55848 | <a href="https://www.genecards.org/cgi-bin/carddisp.pl?gene=MIR371B">https://www.genecards.org/cgi-bin/carddisp.pl?gene=MIR371B</a>     |
| MIR4728   | MicroRNA 4728                                                          | RNA Gene       | 12 | GC17P039726 | 0.55848 | <a href="https://www.genecards.org/cgi-bin/carddisp.pl?gene=MIR4728">https://www.genecards.org/cgi-bin/carddisp.pl?gene=MIR4728</a>     |
| UBA52P6   | Ubiquitin A-52 Residue Ribosomal Protein Fusion Product 1 Pseudogene 6 | Pseudo gene    | 10 | GC09P022032 | 0.55848 | <a href="https://www.genecards.org/cgi-bin/carddisp.pl?gene=UBA52P6">https://www.genecards.org/cgi-bin/carddisp.pl?gene=UBA52P6</a>     |
| NPM1P7    | Nucleophosmin 1 Pseudogene 7                                           | Pseudo gene    | 9  | GC12P021195 | 0.55848 | <a href="https://www.genecards.org/cgi-bin/carddisp.pl?gene=NPM1P7">https://www.genecards.org/cgi-bin/carddisp.pl?gene=NPM1P7</a>       |
| RNU2-3P   | RNA, U2 Small Nuclear 3, Pseudogene                                    | Pseudo gene    | 9  | GC15P095745 | 0.55848 | <a href="https://www.genecards.org/cgi-bin/carddisp.pl?gene=RNU2-3P">https://www.genecards.org/cgi-bin/carddisp.pl?gene=RNU2-3P</a>     |
| AAVS1     | Adeno-Associated Virus Integration Site 1                              | Genetic Locus  | 6  | GC19U990001 | 0.55848 | <a href="https://www.genecards.org/cgi-bin/carddisp.pl?gene=AAVS1">https://www.genecards.org/cgi-bin/carddisp.pl?gene=AAVS1</a>         |
| RPS14P10  | Ribosomal Protein S14 Pseudogene 10                                    | Pseudo gene    | 6  | GC07P131665 | 0.55848 | <a href="https://www.genecards.org/cgi-">https://www.genecards.org/cgi-</a>                                                             |

|          |                                                                        |                |    |             |          |                                                                                                                                              |
|----------|------------------------------------------------------------------------|----------------|----|-------------|----------|----------------------------------------------------------------------------------------------------------------------------------------------|
|          |                                                                        |                |    |             |          | <a href="http://www.ncbi.nlm.nih.gov/ncbi/cdd/bin/carddisp.pl?gene=RPS14P10">bin/carddisp.pl?gene=RPS14P10</a>                               |
| RPL39P10 | Ribosomal Protein L39 Pseudogene 10                                    | Pseudogene     | 5  | GC01M239053 | 0.55848  | <a href="http://www.ncbi.nlm.nih.gov/ncbi/cdd/bin/carddisp.pl?gene=RPL39P10">https://www.genecards.org/cgi-bin/carddisp.pl?gene=RPL39P10</a> |
| IBD15    | Inflammatory Bowel Disease-15                                          | Genetic Locus  | 2  | GC10U901075 | 0.55848  | <a href="http://www.ncbi.nlm.nih.gov/ncbi/cdd/bin/carddisp.pl?gene=IBD15">https://www.genecards.org/cgi-bin/carddisp.pl?gene=IBD15</a>       |
| IBD18    | Inflammatory Bowel Disease-18                                          | Genetic Locus  | 2  | GC05U901053 | 0.55848  | <a href="http://www.ncbi.nlm.nih.gov/ncbi/cdd/bin/carddisp.pl?gene=IBD18">https://www.genecards.org/cgi-bin/carddisp.pl?gene=IBD18</a>       |
| POMGNT2  | Protein O-Linked Mannose N-Acetylglucosaminyltransferase 2 (Beta 1,4-) | Protein Coding | 36 | GC03M043121 | 0.553841 | <a href="http://www.ncbi.nlm.nih.gov/ncbi/cdd/bin/carddisp.pl?gene=POMGNT2">https://www.genecards.org/cgi-bin/carddisp.pl?gene=POMGNT2</a>   |
| DCC      | DCC Netrin 1 Receptor                                                  | Protein Coding | 45 | GC18P052340 | 0.548455 | <a href="http://www.ncbi.nlm.nih.gov/ncbi/cdd/bin/carddisp.pl?gene=DCC">https://www.genecards.org/cgi-bin/carddisp.pl?gene=DCC</a>           |
| THSD7A   | Thrombospondin Type 1 Domain Containing 7A                             | Protein Coding | 36 | GC07M011371 | 0.548455 | <a href="http://www.ncbi.nlm.nih.gov/ncbi/cdd/bin/carddisp.pl?gene=THSD7A">https://www.genecards.org/cgi-bin/carddisp.pl?gene=THSD7A</a>     |
| BCAT1    | Branched Chain Amino Acid Transaminase 1                               | Protein Coding | 44 | GC12M024732 | 0.545865 | <a href="http://www.ncbi.nlm.nih.gov/ncbi/cdd/bin/carddisp.pl?gene=BCAT1">https://www.genecards.org/cgi-bin/carddisp.pl?gene=BCAT1</a>       |
| FGF11    | Fibroblast Growth Factor 11                                            | Protein Coding | 38 | GC17P011161 | 0.53919  | <a href="http://www.ncbi.nlm.nih.gov/ncbi/cdd/bin/carddisp.pl?gene=FGF11">https://www.genecards.org/cgi-bin/carddisp.pl?gene=FGF11</a>       |
| BDKRB1   | Bradykinin Receptor B1                                                 | Protein Coding | 41 | GC14P096296 | 0.539168 | <a href="http://www.ncbi.nlm.nih.gov/ncbi/cdd/bin/carddisp.pl?gene=BDKRB1">https://www.genecards.org/cgi-bin/carddisp.pl?gene=BDKRB1</a>     |
| SLC29A3  | Solute Carrier Family 29 Member 3                                      | Protein Coding | 43 | GC10P071320 | 0.538765 | <a href="http://www.ncbi.nlm.nih.gov/ncbi/cdd/bin/carddisp.pl?gene=SLC29A3">https://www.genecards.org/cgi-bin/carddisp.pl?gene=SLC29A3</a>   |
| EEF2     | Eukaryotic Translation Elongation Factor 2                             | Protein Coding | 47 | GC19M003976 | 0.537908 | <a href="http://www.ncbi.nlm.nih.gov/ncbi/cdd/bin/carddisp.pl?gene=EEF2">https://www.genecards.org/cgi-bin/carddisp.pl?gene=EEF2</a>         |
| PLA1A    | Phospholipase A1 Member A                                              | Protein Coding | 38 | GC03P119597 | 0.518574 | <a href="http://www.ncbi.nlm.nih.gov/ncbi/cdd/bin/carddisp.pl?gene=PLA1A">https://www.genecards.org/cgi-bin/carddisp.pl?gene=PLA1A</a>       |
| MLXIPL   | MLX Interacting Protein Like                                           | Protein Coding | 41 | GC07M073593 | 0.512319 | <a href="http://www.ncbi.nlm.nih.gov/ncbi/cdd/bin/carddisp.pl?gene=MLXIPL">https://www.genecards.org/cgi-bin/carddisp.pl?gene=MLXIPL</a>     |



|         |                                                      |                |    |             |          |                                                                                                                                     |
|---------|------------------------------------------------------|----------------|----|-------------|----------|-------------------------------------------------------------------------------------------------------------------------------------|
| TFAP2A  | Transcription Factor AP-2 Alpha                      | Protein Coding | 45 | GC06M010393 | 0.511037 | <a href="https://www.genecards.org/cgi-bin/carddisp.pl?gene=TFAP2A">https://www.genecards.org/cgi-bin/carddisp.pl?gene=TFAP2A</a>   |
| SLC25A1 | Solute Carrier Family 25 Member 1                    | Protein Coding | 45 | GC22M019355 | 0.501772 | <a href="https://www.genecards.org/cgi-bin/carddisp.pl?gene=SLC25A1">https://www.genecards.org/cgi-bin/carddisp.pl?gene=SLC25A1</a> |
| DLAT    | Dihydrolipoamide S-Acetyltransferase                 | Protein Coding | 44 | GC11P112026 | 0.501772 | <a href="https://www.genecards.org/cgi-bin/carddisp.pl?gene=DLAT">https://www.genecards.org/cgi-bin/carddisp.pl?gene=DLAT</a>       |
| PROX1   | Prospero Homeobox 1                                  | Protein Coding | 42 | GC01P213983 | 0.501772 | <a href="https://www.genecards.org/cgi-bin/carddisp.pl?gene=PROX1">https://www.genecards.org/cgi-bin/carddisp.pl?gene=PROX1</a>     |
| CHD3    | Chromodomain Helicase DNA Binding Protein 3          | Protein Coding | 41 | GC17P011184 | 0.501772 | <a href="https://www.genecards.org/cgi-bin/carddisp.pl?gene=CHD3">https://www.genecards.org/cgi-bin/carddisp.pl?gene=CHD3</a>       |
| RPS9    | Ribosomal Protein S9                                 | Protein Coding | 41 | GC19P069272 | 0.501772 | <a href="https://www.genecards.org/cgi-bin/carddisp.pl?gene=RPS9">https://www.genecards.org/cgi-bin/carddisp.pl?gene=RPS9</a>       |
| SLC25A6 | Solute Carrier Family 25 Member 6                    | Protein Coding | 40 | GC0XM001386 | 0.501772 | <a href="https://www.genecards.org/cgi-bin/carddisp.pl?gene=SLC25A6">https://www.genecards.org/cgi-bin/carddisp.pl?gene=SLC25A6</a> |
| HYDIN   | HYDIN Axonemal Central Pair Apparatus Protein        | Protein Coding | 37 | GC16M070920 | 0.501772 | <a href="https://www.genecards.org/cgi-bin/carddisp.pl?gene=HYDIN">https://www.genecards.org/cgi-bin/carddisp.pl?gene=HYDIN</a>     |
| MARS1   | Methionyl-TRNA Synthetase 1                          | Protein Coding | 36 | GC12P057476 | 0.501772 | <a href="https://www.genecards.org/cgi-bin/carddisp.pl?gene=MARS1">https://www.genecards.org/cgi-bin/carddisp.pl?gene=MARS1</a>     |
| MZB1    | Marginal Zone B And B1 Cell Specific Protein         | Protein Coding | 33 | GC05M139387 | 0.501772 | <a href="https://www.genecards.org/cgi-bin/carddisp.pl?gene=MZB1">https://www.genecards.org/cgi-bin/carddisp.pl?gene=MZB1</a>       |
| VPS13C  | Vacuolar Protein Sorting 13 Homolog C                | Protein Coding | 33 | GC15M061852 | 0.501772 | <a href="https://www.genecards.org/cgi-bin/carddisp.pl?gene=VPS13C">https://www.genecards.org/cgi-bin/carddisp.pl?gene=VPS13C</a>   |
| CAMK2G  | Calcium/Calmodulin Dependent Protein Kinase II Gamma | Protein Coding | 46 | GC10M073812 | 0.495198 | <a href="https://www.genecards.org/cgi-bin/carddisp.pl?gene=CAMK2G">https://www.genecards.org/cgi-bin/carddisp.pl?gene=CAMK2G</a>   |
| CD3E    | CD3 Epsilon Subunit Of T-Cell Receptor Complex       | Protein Coding | 45 | GC11P118304 | 0.495198 | <a href="https://www.genecards.org/cgi-bin/carddisp.pl?gene=CD3E">https://www.genecards.org/cgi-bin/carddisp.pl?gene=CD3E</a>       |
| RABEP2  | Rabaptin, RAB GTPase Binding Effector Protein 2      | Protein Coding | 33 | GC16M036985 | 0.491658 | <a href="https://www.genecards.org/cgi-">https://www.genecards.org/cgi-</a>                                                         |

|         |                                                  |                |    |             |          |                                                                                                                                            |
|---------|--------------------------------------------------|----------------|----|-------------|----------|--------------------------------------------------------------------------------------------------------------------------------------------|
|         |                                                  |                |    |             |          | <a href="http://www.ncbi.nlm.nih.gov/ncbi/cdd/bin/carddisp.pl?gene=RABEP2">bin/carddisp.pl?gene=RABEP2</a>                                 |
| CEACAM3 | CEA Cell Adhesion Molecule 3                     | Protein Coding | 41 | GC19P041796 | 0.488322 | <a href="http://www.ncbi.nlm.nih.gov/ncbi/cdd/bin/carddisp.pl?gene=CEACAM3">https://www.genecards.org/cgi-bin/carddisp.pl?gene=CEACAM3</a> |
| CSNK2A1 | Casein Kinase 2 Alpha 1                          | Protein Coding | 48 | GC20M000472 | 0.474901 | <a href="http://www.ncbi.nlm.nih.gov/ncbi/cdd/bin/carddisp.pl?gene=CSNK2A1">https://www.genecards.org/cgi-bin/carddisp.pl?gene=CSNK2A1</a> |
| ACACA   | Acetyl-CoA Carboxylase Alpha                     | Protein Coding | 46 | GC17M037084 | 0.474901 | <a href="http://www.ncbi.nlm.nih.gov/ncbi/cdd/bin/carddisp.pl?gene=ACACA">https://www.genecards.org/cgi-bin/carddisp.pl?gene=ACACA</a>     |
| JUP     | Junction Plakoglobin                             | Protein Coding | 46 | GC17M041754 | 0.474901 | <a href="http://www.ncbi.nlm.nih.gov/ncbi/cdd/bin/carddisp.pl?gene=JUP">https://www.genecards.org/cgi-bin/carddisp.pl?gene=JUP</a>         |
| NR1H4   | Nuclear Receptor Subfamily 1 Group H Member 4    | Protein Coding | 46 | GC12P100473 | 0.474901 | <a href="http://www.ncbi.nlm.nih.gov/ncbi/cdd/bin/carddisp.pl?gene=NR1H4">https://www.genecards.org/cgi-bin/carddisp.pl?gene=NR1H4</a>     |
| USP9X   | Ubiquitin Specific Peptidase 9 X-Linked          | Protein Coding | 46 | GC0XP041085 | 0.474901 | <a href="http://www.ncbi.nlm.nih.gov/ncbi/cdd/bin/carddisp.pl?gene=USP9X">https://www.genecards.org/cgi-bin/carddisp.pl?gene=USP9X</a>     |
| AKR1B1  | Aldo-Keto Reductase Family 1 Member B            | Protein Coding | 45 | GC07M134442 | 0.474901 | <a href="http://www.ncbi.nlm.nih.gov/ncbi/cdd/bin/carddisp.pl?gene=AKR1B1">https://www.genecards.org/cgi-bin/carddisp.pl?gene=AKR1B1</a>   |
| ETV6    | ETS Variant Transcription Factor 6               | Protein Coding | 45 | GC12P011649 | 0.474901 | <a href="http://www.ncbi.nlm.nih.gov/ncbi/cdd/bin/carddisp.pl?gene=ETV6">https://www.genecards.org/cgi-bin/carddisp.pl?gene=ETV6</a>       |
| PPARD   | Peroxisome Proliferator Activated Receptor Delta | Protein Coding | 45 | GC06P083822 | 0.474901 | <a href="http://www.ncbi.nlm.nih.gov/ncbi/cdd/bin/carddisp.pl?gene=PPARD">https://www.genecards.org/cgi-bin/carddisp.pl?gene=PPARD</a>     |
| CNTN2   | Contactin 2                                      | Protein Coding | 44 | GC01P205043 | 0.474901 | <a href="http://www.ncbi.nlm.nih.gov/ncbi/cdd/bin/carddisp.pl?gene=CNTN2">https://www.genecards.org/cgi-bin/carddisp.pl?gene=CNTN2</a>     |
| CS      | Citrate Synthase                                 | Protein Coding | 43 | GC12M056271 | 0.474901 | <a href="http://www.ncbi.nlm.nih.gov/ncbi/cdd/bin/carddisp.pl?gene=CS">https://www.genecards.org/cgi-bin/carddisp.pl?gene=CS</a>           |
| BCL10   | BCL10 Immune Signaling Adaptor                   | Protein Coding | 42 | GC01M085265 | 0.474901 | <a href="http://www.ncbi.nlm.nih.gov/ncbi/cdd/bin/carddisp.pl?gene=BCL10">https://www.genecards.org/cgi-bin/carddisp.pl?gene=BCL10</a>     |
| MTTP    | Microsomal Triglyceride Transfer Protein         | Protein Coding | 42 | GC04P099563 | 0.474901 | <a href="http://www.ncbi.nlm.nih.gov/ncbi/cdd/bin/carddisp.pl?gene=MTTP">https://www.genecards.org/cgi-bin/carddisp.pl?gene=MTTP</a>       |

|              |                                                               |                |    |             |          |                                                                                                                                               |
|--------------|---------------------------------------------------------------|----------------|----|-------------|----------|-----------------------------------------------------------------------------------------------------------------------------------------------|
| MEGF10       | Multiple EGF Like Domains 10                                  | Protein Coding | 41 | GC05P127230 | 0.474901 | <a href="https://www.genecards.org/cgi-bin/carddisp.pl?gene=MEGF10">https://www.genecards.org/cgi-bin/carddisp.pl?gene=MEGF10</a>             |
| COLQ         | Collagen Like Tail Subunit Of Asymmetric Acetylcholinesterase | Protein Coding | 40 | GC03M020745 | 0.474901 | <a href="https://www.genecards.org/cgi-bin/carddisp.pl?gene=COLQ">https://www.genecards.org/cgi-bin/carddisp.pl?gene=COLQ</a>                 |
| PPIG         | Peptidylprolyl Isomerase G                                    | Protein Coding | 40 | GC02P169584 | 0.474901 | <a href="https://www.genecards.org/cgi-bin/carddisp.pl?gene=PPIG">https://www.genecards.org/cgi-bin/carddisp.pl?gene=PPIG</a>                 |
| SORBS1       | Sorbin And SH3 Domain Containing 1                            | Protein Coding | 40 | GC10M095311 | 0.474901 | <a href="https://www.genecards.org/cgi-bin/carddisp.pl?gene=SORBS1">https://www.genecards.org/cgi-bin/carddisp.pl?gene=SORBS1</a>             |
| GNPTG        | N-Acetylglucosamine-1-Phosphate Transferase Subunit Gamma     | Protein Coding | 39 | GC16P001351 | 0.474901 | <a href="https://www.genecards.org/cgi-bin/carddisp.pl?gene=GNPTG">https://www.genecards.org/cgi-bin/carddisp.pl?gene=GNPTG</a>               |
| RC3H1        | Ring Finger And CCCH-Type Domains 1                           | Protein Coding | 35 | GC01M173931 | 0.474901 | <a href="https://www.genecards.org/cgi-bin/carddisp.pl?gene=RC3H1">https://www.genecards.org/cgi-bin/carddisp.pl?gene=RC3H1</a>               |
| SNTG1        | Syntrophin Gamma 1                                            | Protein Coding | 33 | GC08P049909 | 0.474901 | <a href="https://www.genecards.org/cgi-bin/carddisp.pl?gene=SNTG1">https://www.genecards.org/cgi-bin/carddisp.pl?gene=SNTG1</a>               |
| LOC101929710 | Uncharacterized LOC101929710                                  | RNA Gene       | 13 | GC05P095962 | 0.474901 | <a href="https://www.genecards.org/cgi-bin/carddisp.pl?gene=LOC101929710">https://www.genecards.org/cgi-bin/carddisp.pl?gene=LOC101929710</a> |
| PPP3CA       | Protein Phosphatase 3 Catalytic Subunit Alpha                 | Protein Coding | 50 | GC04M101024 | 0.473039 | <a href="https://www.genecards.org/cgi-bin/carddisp.pl?gene=PPP3CA">https://www.genecards.org/cgi-bin/carddisp.pl?gene=PPP3CA</a>             |
| RHBDF2       | Rhomoid 5 Homolog 2                                           | Protein Coding | 42 | GC17M076470 | 0.468146 | <a href="https://www.genecards.org/cgi-bin/carddisp.pl?gene=RHBDF2">https://www.genecards.org/cgi-bin/carddisp.pl?gene=RHBDF2</a>             |
| SRGN         | Serglycin                                                     | Protein Coding | 38 | GC10P069088 | 0.468146 | <a href="https://www.genecards.org/cgi-bin/carddisp.pl?gene=SRGN">https://www.genecards.org/cgi-bin/carddisp.pl?gene=SRGN</a>                 |
| RNU11        | RNA, U11 Small Nuclear                                        | RNA Gene       | 17 | GC01P028797 | 0.468146 | <a href="https://www.genecards.org/cgi-bin/carddisp.pl?gene=RNU11">https://www.genecards.org/cgi-bin/carddisp.pl?gene=RNU11</a>               |
| CLTC         | Clathrin Heavy Chain                                          | Protein Coding | 45 | GC17P059619 | 0.46747  | <a href="https://www.genecards.org/cgi-bin/carddisp.pl?gene=CLTC">https://www.genecards.org/cgi-bin/carddisp.pl?gene=CLTC</a>                 |

|         |                                                                              |                |    |             |          |                                                                                                                                     |
|---------|------------------------------------------------------------------------------|----------------|----|-------------|----------|-------------------------------------------------------------------------------------------------------------------------------------|
| KCNA2   | Potassium Voltage-Gated Channel Subfamily A Member 2                         | Protein Coding | 45 | GC01M110519 | 0.466486 | <a href="https://www.genecards.org/cgi-bin/carddisp.pl?gene=KCNA2">https://www.genecards.org/cgi-bin/carddisp.pl?gene=KCNA2</a>     |
| CGB5    | Chorionic Gonadotropin Subunit Beta 5                                        | Protein Coding | 33 | GC19P049043 | 0.466486 | <a href="https://www.genecards.org/cgi-bin/carddisp.pl?gene=CGB5">https://www.genecards.org/cgi-bin/carddisp.pl?gene=CGB5</a>       |
| AQP9    | Aquaporin 9                                                                  | Protein Coding | 41 | GC15P058138 | 0.458626 | <a href="https://www.genecards.org/cgi-bin/carddisp.pl?gene=AQP9">https://www.genecards.org/cgi-bin/carddisp.pl?gene=AQP9</a>       |
| RPL4    | Ribosomal Protein L4                                                         | Protein Coding | 40 | GC15M066498 | 0.452445 | <a href="https://www.genecards.org/cgi-bin/carddisp.pl?gene=RPL4">https://www.genecards.org/cgi-bin/carddisp.pl?gene=RPL4</a>       |
| YWHAG   | Tyrosine 3-Monooxygenase/Tryptophan 5-Monooxygenase Activation Protein Gamma | Protein Coding | 47 | GC07M076839 | 0.438759 | <a href="https://www.genecards.org/cgi-bin/carddisp.pl?gene=YWHAG">https://www.genecards.org/cgi-bin/carddisp.pl?gene=YWHAG</a>     |
| CNTRF   | Ciliary Neurotrophic Factor Receptor                                         | Protein Coding | 42 | GC09M034551 | 0.438759 | <a href="https://www.genecards.org/cgi-bin/carddisp.pl?gene=CNTRF">https://www.genecards.org/cgi-bin/carddisp.pl?gene=CNTRF</a>     |
| HMG2    | High Mobility Group Nucleosomal Binding Domain 2                             | Protein Coding | 39 | GC01P026473 | 0.438759 | <a href="https://www.genecards.org/cgi-bin/carddisp.pl?gene=HMG2">https://www.genecards.org/cgi-bin/carddisp.pl?gene=HMG2</a>       |
| TSPAN32 | Tetraspanin 32                                                               | Protein Coding | 35 | GC11P002302 | 0.438759 | <a href="https://www.genecards.org/cgi-bin/carddisp.pl?gene=TSPAN32">https://www.genecards.org/cgi-bin/carddisp.pl?gene=TSPAN32</a> |
| PPP2CA  | Protein Phosphatase 2 Catalytic Subunit Alpha                                | Protein Coding | 48 | GC05M134194 | 0.429069 | <a href="https://www.genecards.org/cgi-bin/carddisp.pl?gene=PPP2CA">https://www.genecards.org/cgi-bin/carddisp.pl?gene=PPP2CA</a>   |
| DUSP2   | Dual Specificity Phosphatase 2                                               | Protein Coding | 40 | GC02M098251 | 0.429069 | <a href="https://www.genecards.org/cgi-bin/carddisp.pl?gene=DUSP2">https://www.genecards.org/cgi-bin/carddisp.pl?gene=DUSP2</a>     |
| PTPN18  | Protein Tyrosine Phosphatase Non-Receptor Type 18                            | Protein Coding | 38 | GC02P130356 | 0.429069 | <a href="https://www.genecards.org/cgi-bin/carddisp.pl?gene=PTPN18">https://www.genecards.org/cgi-bin/carddisp.pl?gene=PTPN18</a>   |
| RIDA    | Reactive Intermediate Imine Deaminase A Homolog                              | Protein Coding | 29 | GC08M098103 | 0.429069 | <a href="https://www.genecards.org/cgi-bin/carddisp.pl?gene=RIDA">https://www.genecards.org/cgi-bin/carddisp.pl?gene=RIDA</a>       |
| CTSV    | Cathepsin V                                                                  | Protein Coding | 40 | GC09M097029 | 0.427418 | <a href="https://www.genecards.org/cgi-bin/carddisp.pl?gene=CTSV">https://www.genecards.org/cgi-bin/carddisp.pl?gene=CTSV</a>       |
| ADORA1  | Adenosine A1 Receptor                                                        | Protein Coding | 45 | GC01P203090 | 0.42508  | <a href="https://www.genecards.org/cgi-">https://www.genecards.org/cgi-</a>                                                         |

|          |                                                   |                |    |             |          |                                                                                                                                       |
|----------|---------------------------------------------------|----------------|----|-------------|----------|---------------------------------------------------------------------------------------------------------------------------------------|
|          |                                                   |                |    |             |          | <a href="#">bin/carddisp.pl?gene=ADORA1</a>                                                                                           |
| KLK3     | Kallikrein Related Peptidase 3                    | Protein Coding | 45 | GC19P050854 | 0.408265 | <a href="https://www.genecards.org/cgi-bin/carddisp.pl?gene=KLK3">https://www.genecards.org/cgi-bin/carddisp.pl?gene=KLK3</a>         |
| IGHV3-33 | Immunoglobulin Heavy Variable 3-33                | Protein Coding | 16 | GC14M112850 | 0.408265 | <a href="https://www.genecards.org/cgi-bin/carddisp.pl?gene=IGHV3-33">https://www.genecards.org/cgi-bin/carddisp.pl?gene=IGHV3-33</a> |
| AP2A1    | Adaptor Related Protein Complex 2 Subunit Alpha 1 | Protein Coding | 38 | GC19P067127 | 0.402623 | <a href="https://www.genecards.org/cgi-bin/carddisp.pl?gene=AP2A1">https://www.genecards.org/cgi-bin/carddisp.pl?gene=AP2A1</a>       |
| NR4A3    | Nuclear Receptor Subfamily 4 Group A Member 3     | Protein Coding | 43 | GC09P099821 | 0.401341 | <a href="https://www.genecards.org/cgi-bin/carddisp.pl?gene=NR4A3">https://www.genecards.org/cgi-bin/carddisp.pl?gene=NR4A3</a>       |
| ITPR2    | Inositol 1,4,5-Trisphosphate Receptor Type 2      | Protein Coding | 45 | GC12M026336 | 0.397066 | <a href="https://www.genecards.org/cgi-bin/carddisp.pl?gene=ITPR2">https://www.genecards.org/cgi-bin/carddisp.pl?gene=ITPR2</a>       |
| NPR2     | Natriuretic Peptide Receptor 2                    | Protein Coding | 48 | GC09P047173 | 0.387662 | <a href="https://www.genecards.org/cgi-bin/carddisp.pl?gene=NPR2">https://www.genecards.org/cgi-bin/carddisp.pl?gene=NPR2</a>         |
| MASP1    | MBL Associated Serine Protease 1                  | Protein Coding | 47 | GC03M187216 | 0.380906 | <a href="https://www.genecards.org/cgi-bin/carddisp.pl?gene=MASP1">https://www.genecards.org/cgi-bin/carddisp.pl?gene=MASP1</a>       |
| SOS1     | SOS Ras/Rac Guanine Nucleotide Exchange Factor 1  | Protein Coding | 46 | GC02M039031 | 0.380906 | <a href="https://www.genecards.org/cgi-bin/carddisp.pl?gene=SOS1">https://www.genecards.org/cgi-bin/carddisp.pl?gene=SOS1</a>         |
| FZD5     | Frizzled Class Receptor 5                         | Protein Coding | 45 | GC02M207762 | 0.380906 | <a href="https://www.genecards.org/cgi-bin/carddisp.pl?gene=FZD5">https://www.genecards.org/cgi-bin/carddisp.pl?gene=FZD5</a>         |
| EHMT1    | Euchromatic Histone Lysine Methyltransferase 1    | Protein Coding | 44 | GC09P137618 | 0.380906 | <a href="https://www.genecards.org/cgi-bin/carddisp.pl?gene=EHMT1">https://www.genecards.org/cgi-bin/carddisp.pl?gene=EHMT1</a>       |
| RALBP1   | RalA Binding Protein 1                            | Protein Coding | 43 | GC18P009465 | 0.380906 | <a href="https://www.genecards.org/cgi-bin/carddisp.pl?gene=RALBP1">https://www.genecards.org/cgi-bin/carddisp.pl?gene=RALBP1</a>     |
| HDAC10   | Histone Deacetylase 10                            | Protein Coding | 42 | GC22M050245 | 0.380906 | <a href="https://www.genecards.org/cgi-bin/carddisp.pl?gene=HDAC10">https://www.genecards.org/cgi-bin/carddisp.pl?gene=HDAC10</a>     |
| NRIP1    | Nuclear Receptor Interacting Protein 1            | Protein Coding | 42 | GC21M014961 | 0.380906 | <a href="https://www.genecards.org/cgi-bin/carddisp.pl?gene=NRIP1">https://www.genecards.org/cgi-bin/carddisp.pl?gene=NRIP1</a>       |

|              |                                                           |                   |    |             |          |                                                                                                                                               |
|--------------|-----------------------------------------------------------|-------------------|----|-------------|----------|-----------------------------------------------------------------------------------------------------------------------------------------------|
| SETD7        | SET Domain Containing 7, Histone Lysine Methyltransferase | Protein Coding    | 42 | GC04M139495 | 0.380906 | <a href="https://www.genecards.org/cgi-bin/carddisp.pl?gene=SETD7">https://www.genecards.org/cgi-bin/carddisp.pl?gene=SETD7</a>               |
| SP100        | SP100 Nuclear Antigen                                     | Protein Coding    | 40 | GC02P230415 | 0.380906 | <a href="https://www.genecards.org/cgi-bin/carddisp.pl?gene=SP100">https://www.genecards.org/cgi-bin/carddisp.pl?gene=SP100</a>               |
| ENAM         | Enamelin                                                  | Protein Coding    | 39 | GC04P070628 | 0.380906 | <a href="https://www.genecards.org/cgi-bin/carddisp.pl?gene=ENAM">https://www.genecards.org/cgi-bin/carddisp.pl?gene=ENAM</a>                 |
| WWTR1        | WW Domain Containing Transcription Regulator 1            | Protein Coding    | 39 | GC03M149517 | 0.380906 | <a href="https://www.genecards.org/cgi-bin/carddisp.pl?gene=WWTR1">https://www.genecards.org/cgi-bin/carddisp.pl?gene=WWTR1</a>               |
| MRGPRX2      | MAS Related GPR Family Member X2                          | Protein Coding    | 36 | GC11M019077 | 0.380906 | <a href="https://www.genecards.org/cgi-bin/carddisp.pl?gene=MRGPRX2">https://www.genecards.org/cgi-bin/carddisp.pl?gene=MRGPRX2</a>           |
| SAMD9        | Sterile Alpha Motif Domain Containing 9                   | Protein Coding    | 36 | GC07M093099 | 0.380906 | <a href="https://www.genecards.org/cgi-bin/carddisp.pl?gene=SAMD9">https://www.genecards.org/cgi-bin/carddisp.pl?gene=SAMD9</a>               |
| JPH4         | Junctophilin 4                                            | Protein Coding    | 34 | GC14M023568 | 0.380906 | <a href="https://www.genecards.org/cgi-bin/carddisp.pl?gene=JPH4">https://www.genecards.org/cgi-bin/carddisp.pl?gene=JPH4</a>                 |
| OTUD1        | OTU Deubiquitinase 1                                      | Protein Coding    | 32 | GC10P023439 | 0.380906 | <a href="https://www.genecards.org/cgi-bin/carddisp.pl?gene=OTUD1">https://www.genecards.org/cgi-bin/carddisp.pl?gene=OTUD1</a>               |
| MIRLET7I     | MicroRNA Let-7i                                           | RNA Gene          | 21 | GC12P062606 | 0.380906 | <a href="https://www.genecards.org/cgi-bin/carddisp.pl?gene=MIRLET7I">https://www.genecards.org/cgi-bin/carddisp.pl?gene=MIRLET7I</a>         |
| MOXD2P       | Monooxygenase DBH Like 2, Pseudogene                      | Pseudo gene       | 14 | GC07M142254 | 0.380906 | <a href="https://www.genecards.org/cgi-bin/carddisp.pl?gene=MOXD2P">https://www.genecards.org/cgi-bin/carddisp.pl?gene=MOXD2P</a>             |
| LOC110740340 | CYP2D6 Promoter                                           | Biological Region | 2  | GC22P043272 | 0.380906 | <a href="https://www.genecards.org/cgi-bin/carddisp.pl?gene=LOC110740340">https://www.genecards.org/cgi-bin/carddisp.pl?gene=LOC110740340</a> |
| HCST         | Hematopoietic Cell Signal Transducer                      | Protein Coding    | 35 | GC19P066557 | 0.376471 | <a href="https://www.genecards.org/cgi-bin/carddisp.pl?gene=HCST">https://www.genecards.org/cgi-bin/carddisp.pl?gene=HCST</a>                 |
| ABCA4        | ATP Binding Cassette Subfamily A Member 4                 | Protein Coding    | 45 | GC01M093992 | 0.365205 | <a href="https://www.genecards.org/cgi-bin/carddisp.pl?gene=ABCA4">https://www.genecards.org/cgi-bin/carddisp.pl?gene=ABCA4</a>               |
| CD37         | CD37 Molecule                                             | Protein Coding    | 41 | GC19P049335 | 0.365205 | <a href="https://www.genecards.org/cgi-bin/carddisp.pl?gene=CD37">https://www.genecards.org/cgi-bin/carddisp.pl?gene=CD37</a>                 |

|          |                                                                                       |                |    |             |          |                                                                                                                                       |
|----------|---------------------------------------------------------------------------------------|----------------|----|-------------|----------|---------------------------------------------------------------------------------------------------------------------------------------|
|          |                                                                                       |                |    |             |          | <a href="#">bin/carddisp.pl?gene=CD37</a>                                                                                             |
| TPPP3    | Tubulin Polymerization Promoting Protein Family Member 3                              | Protein Coding | 36 | GC16M067389 | 0.365205 | <a href="https://www.genecards.org/cgi-bin/carddisp.pl?gene=TPPP3">https://www.genecards.org/cgi-bin/carddisp.pl?gene=TPPP3</a>       |
| KIR2DS5  | Killer Cell Immunoglobulin Like Receptor, Two Ig Domains And Short Cytoplasmic Tail 5 | Protein Coding | 23 | GC19Mr00079 | 0.355146 | <a href="https://www.genecards.org/cgi-bin/carddisp.pl?gene=KIR2DS5">https://www.genecards.org/cgi-bin/carddisp.pl?gene=KIR2DS5</a>   |
| USP4     | Ubiquitin Specific Peptidase 4                                                        | Protein Coding | 42 | GC03M049277 | 0.322824 | <a href="https://www.genecards.org/cgi-bin/carddisp.pl?gene=USP4">https://www.genecards.org/cgi-bin/carddisp.pl?gene=USP4</a>         |
| PRKD1    | Protein Kinase D1                                                                     | Protein Coding | 48 | GC14M029576 | 0.307566 | <a href="https://www.genecards.org/cgi-bin/carddisp.pl?gene=PRKD1">https://www.genecards.org/cgi-bin/carddisp.pl?gene=PRKD1</a>       |
| RORA     | RAR Related Orphan Receptor A                                                         | Protein Coding | 46 | GC15M060488 | 0.307566 | <a href="https://www.genecards.org/cgi-bin/carddisp.pl?gene=RORA">https://www.genecards.org/cgi-bin/carddisp.pl?gene=RORA</a>         |
| RPS2     | Ribosomal Protein S2                                                                  | Protein Coding | 41 | GC16M007099 | 0.307566 | <a href="https://www.genecards.org/cgi-bin/carddisp.pl?gene=RPS2">https://www.genecards.org/cgi-bin/carddisp.pl?gene=RPS2</a>         |
| SOX13    | SRY-Box Transcription Factor 13                                                       | Protein Coding | 40 | GC01P204074 | 0.307566 | <a href="https://www.genecards.org/cgi-bin/carddisp.pl?gene=SOX13">https://www.genecards.org/cgi-bin/carddisp.pl?gene=SOX13</a>       |
| CAPNS1   | Calpain Small Subunit 1                                                               | Protein Coding | 39 | GC19P066563 | 0.307566 | <a href="https://www.genecards.org/cgi-bin/carddisp.pl?gene=CAPNS1">https://www.genecards.org/cgi-bin/carddisp.pl?gene=CAPNS1</a>     |
| ATP6V1G2 | ATPase H <sup>+</sup> Transporting V1 Subunit G2                                      | Protein Coding | 37 | GC06M065955 | 0.307566 | <a href="https://www.genecards.org/cgi-bin/carddisp.pl?gene=ATP6V1G2">https://www.genecards.org/cgi-bin/carddisp.pl?gene=ATP6V1G2</a> |
| SLC25A16 | Solute Carrier Family 25 Member 16                                                    | Protein Coding | 37 | GC10M068477 | 0.307566 | <a href="https://www.genecards.org/cgi-bin/carddisp.pl?gene=SLC25A16">https://www.genecards.org/cgi-bin/carddisp.pl?gene=SLC25A16</a> |
| PLD5     | Phospholipase D Family Member 5                                                       | Protein Coding | 35 | GC01M242082 | 0.307566 | <a href="https://www.genecards.org/cgi-bin/carddisp.pl?gene=PLD5">https://www.genecards.org/cgi-bin/carddisp.pl?gene=PLD5</a>         |
| ZNF330   | Zinc Finger Protein 330                                                               | Protein Coding | 35 | GC04P141220 | 0.307566 | <a href="https://www.genecards.org/cgi-bin/carddisp.pl?gene=ZNF330">https://www.genecards.org/cgi-bin/carddisp.pl?gene=ZNF330</a>     |
| TMEM258  | Transmembrane Protein 258                                                             | Protein Coding | 30 | GC11M061768 | 0.307566 | <a href="https://www.genecards.org/cgi-">https://www.genecards.org/cgi-</a>                                                           |

|         |                                           |                |    |             |          |                                                                                                                                            |
|---------|-------------------------------------------|----------------|----|-------------|----------|--------------------------------------------------------------------------------------------------------------------------------------------|
|         |                                           |                |    |             |          | <a href="http://www.ncbi.nlm.nih.gov/ncbi/cdd/bin/carddisp.pl?gene=TMEM258">bin/carddisp.pl?gene=TMEM258</a>                               |
| CRLF1   | Cytokine Receptor Like Factor 1           | Protein Coding | 42 | GC19M018572 | 0.30223  | <a href="http://www.ncbi.nlm.nih.gov/ncbi/cdd/bin/carddisp.pl?gene=CRLF1">https://www.genecards.org/cgi-bin/carddisp.pl?gene=CRLF1</a>     |
| ADAM33  | ADAM Metallopeptidase Domain 33           | Protein Coding | 37 | GC20M003669 | 0.30223  | <a href="http://www.ncbi.nlm.nih.gov/ncbi/cdd/bin/carddisp.pl?gene=ADAM33">https://www.genecards.org/cgi-bin/carddisp.pl?gene=ADAM33</a>   |
| HMGA1   | High Mobility Group AT-Hook 1             | Protein Coding | 44 | GC06P083808 | 0.279838 | <a href="http://www.ncbi.nlm.nih.gov/ncbi/cdd/bin/carddisp.pl?gene=HMGA1">https://www.genecards.org/cgi-bin/carddisp.pl?gene=HMGA1</a>     |
| CD7     | CD7 Molecule                              | Protein Coding | 38 | GC17M082314 | 0.279838 | <a href="http://www.ncbi.nlm.nih.gov/ncbi/cdd/bin/carddisp.pl?gene=CD7">https://www.genecards.org/cgi-bin/carddisp.pl?gene=CD7</a>         |
| VEGFB   | Vascular Endothelial Growth Factor B      | Protein Coding | 42 | GC11P064234 | 0.278854 | <a href="http://www.ncbi.nlm.nih.gov/ncbi/cdd/bin/carddisp.pl?gene=VEGFB">https://www.genecards.org/cgi-bin/carddisp.pl?gene=VEGFB</a>     |
| OMD     | Osteomodulin                              | Protein Coding | 39 | GC09M094205 | 0.278854 | <a href="http://www.ncbi.nlm.nih.gov/ncbi/cdd/bin/carddisp.pl?gene=OMD">https://www.genecards.org/cgi-bin/carddisp.pl?gene=OMD</a>         |
| DPP9    | Dipeptidyl Peptidase 9                    | Protein Coding | 41 | GC19M004675 | 0.264812 | <a href="http://www.ncbi.nlm.nih.gov/ncbi/cdd/bin/carddisp.pl?gene=DPP9">https://www.genecards.org/cgi-bin/carddisp.pl?gene=DPP9</a>       |
| NCL     | Nucleolin                                 | Protein Coding | 41 | GC02M231453 | 0.264812 | <a href="http://www.ncbi.nlm.nih.gov/ncbi/cdd/bin/carddisp.pl?gene=NCL">https://www.genecards.org/cgi-bin/carddisp.pl?gene=NCL</a>         |
| MAP2K2  | Mitogen-Activated Protein Kinase Kinase 2 | Protein Coding | 50 | GC19M004090 | 0.251126 | <a href="http://www.ncbi.nlm.nih.gov/ncbi/cdd/bin/carddisp.pl?gene=MAP2K2">https://www.genecards.org/cgi-bin/carddisp.pl?gene=MAP2K2</a>   |
| ADAM9   | ADAM Metallopeptidase Domain 9            | Protein Coding | 47 | GC08P038996 | 0.251126 | <a href="http://www.ncbi.nlm.nih.gov/ncbi/cdd/bin/carddisp.pl?gene=ADAM9">https://www.genecards.org/cgi-bin/carddisp.pl?gene=ADAM9</a>     |
| CHRM2   | Cholinergic Receptor Muscarinic 2         | Protein Coding | 46 | GC07P136868 | 0.251126 | <a href="http://www.ncbi.nlm.nih.gov/ncbi/cdd/bin/carddisp.pl?gene=CHRM2">https://www.genecards.org/cgi-bin/carddisp.pl?gene=CHRM2</a>     |
| PRKCI   | Protein Kinase C Iota                     | Protein Coding | 46 | GC03P170222 | 0.251126 | <a href="http://www.ncbi.nlm.nih.gov/ncbi/cdd/bin/carddisp.pl?gene=PRKCI">https://www.genecards.org/cgi-bin/carddisp.pl?gene=PRKCI</a>     |
| ADORA2B | Adenosine A2b Receptor                    | Protein Coding | 45 | GC17P015851 | 0.251126 | <a href="http://www.ncbi.nlm.nih.gov/ncbi/cdd/bin/carddisp.pl?gene=ADORA2B">https://www.genecards.org/cgi-bin/carddisp.pl?gene=ADORA2B</a> |



|          |                                               |                |    |             |          |                                                                                                                                       |
|----------|-----------------------------------------------|----------------|----|-------------|----------|---------------------------------------------------------------------------------------------------------------------------------------|
| APAF1    | Apoptotic Peptidase Activating Factor 1       | Protein Coding | 45 | GC12P098645 | 0.251126 | <a href="https://www.genecards.org/cgi-bin/carddisp.pl?gene=APAF1">https://www.genecards.org/cgi-bin/carddisp.pl?gene=APAF1</a>       |
| ATF6     | Activating Transcription Factor 6             | Protein Coding | 45 | GC01P161766 | 0.251126 | <a href="https://www.genecards.org/cgi-bin/carddisp.pl?gene=ATF6">https://www.genecards.org/cgi-bin/carddisp.pl?gene=ATF6</a>         |
| CD3D     | CD3 Delta Subunit Of T-Cell Receptor Complex  | Protein Coding | 45 | GC11M118338 | 0.251126 | <a href="https://www.genecards.org/cgi-bin/carddisp.pl?gene=CD3D">https://www.genecards.org/cgi-bin/carddisp.pl?gene=CD3D</a>         |
| FH       | Fumarate Hydratase                            | Protein Coding | 45 | GC01M241499 | 0.251126 | <a href="https://www.genecards.org/cgi-bin/carddisp.pl?gene=FH">https://www.genecards.org/cgi-bin/carddisp.pl?gene=FH</a>             |
| PTPRD    | Protein Tyrosine Phosphatase Receptor Type D  | Protein Coding | 45 | GC09M008307 | 0.251126 | <a href="https://www.genecards.org/cgi-bin/carddisp.pl?gene=PTPRD">https://www.genecards.org/cgi-bin/carddisp.pl?gene=PTPRD</a>       |
| CTSZ     | Cathepsin Z                                   | Protein Coding | 44 | GC20M058995 | 0.251126 | <a href="https://www.genecards.org/cgi-bin/carddisp.pl?gene=CTSZ">https://www.genecards.org/cgi-bin/carddisp.pl?gene=CTSZ</a>         |
| KMO      | Kynurenine 3-Monooxygenase                    | Protein Coding | 44 | GC01P241532 | 0.251126 | <a href="https://www.genecards.org/cgi-bin/carddisp.pl?gene=KMO">https://www.genecards.org/cgi-bin/carddisp.pl?gene=KMO</a>           |
| COL7A1   | Collagen Type VII Alpha 1 Chain               | Protein Coding | 43 | GC03M048564 | 0.251126 | <a href="https://www.genecards.org/cgi-bin/carddisp.pl?gene=COL7A1">https://www.genecards.org/cgi-bin/carddisp.pl?gene=COL7A1</a>     |
| PIAS1    | Protein Inhibitor Of Activated STAT 1         | Protein Coding | 43 | GC15P068054 | 0.251126 | <a href="https://www.genecards.org/cgi-bin/carddisp.pl?gene=PIAS1">https://www.genecards.org/cgi-bin/carddisp.pl?gene=PIAS1</a>       |
| TNFRSF21 | TNF Receptor Superfamily Member 21            | Protein Coding | 43 | GC06M047231 | 0.251126 | <a href="https://www.genecards.org/cgi-bin/carddisp.pl?gene=TNFRSF21">https://www.genecards.org/cgi-bin/carddisp.pl?gene=TNFRSF21</a> |
| CYP3A7   | Cytochrome P450 Family 3 Subfamily A Member 7 | Protein Coding | 42 | GC07M099705 | 0.251126 | <a href="https://www.genecards.org/cgi-bin/carddisp.pl?gene=CYP3A7">https://www.genecards.org/cgi-bin/carddisp.pl?gene=CYP3A7</a>     |
| GRK6     | G Protein-Coupled Receptor Kinase 6           | Protein Coding | 42 | GC05P177403 | 0.251126 | <a href="https://www.genecards.org/cgi-bin/carddisp.pl?gene=GRK6">https://www.genecards.org/cgi-bin/carddisp.pl?gene=GRK6</a>         |
| HBA1     | Hemoglobin Subunit Alpha 1                    | Protein Coding | 42 | GC16P011598 | 0.251126 | <a href="https://www.genecards.org/cgi-bin/carddisp.pl?gene=HBA1">https://www.genecards.org/cgi-bin/carddisp.pl?gene=HBA1</a>         |
| ITGA11   | Integrin Subunit Alpha 11                     | Protein Coding | 42 | GC15M068296 | 0.251126 | <a href="https://www.genecards.org/cgi-bin/carddisp.pl?gene=ITGA11">https://www.genecards.org/cgi-bin/carddisp.pl?gene=ITGA11</a>     |

|         |                                                                               |                |    |             |          |                                                                                                                                     |
|---------|-------------------------------------------------------------------------------|----------------|----|-------------|----------|-------------------------------------------------------------------------------------------------------------------------------------|
|         |                                                                               |                |    |             |          | <a href="#">bin/carddisp.pl?gene=ITGA11</a>                                                                                         |
| PSMD2   | Proteasome 26S Subunit Ubiquitin Receptor, Non-ATPase 2                       | Protein Coding | 42 | GC03P184298 | 0.251126 | <a href="https://www.genecards.org/cgi-bin/carddisp.pl?gene=PSMD2">https://www.genecards.org/cgi-bin/carddisp.pl?gene=PSMD2</a>     |
| DBT     | Dihydrolipoamide Branched Chain Transacylase E2                               | Protein Coding | 41 | GC01M100186 | 0.251126 | <a href="https://www.genecards.org/cgi-bin/carddisp.pl?gene=DBT">https://www.genecards.org/cgi-bin/carddisp.pl?gene=DBT</a>         |
| DPP10   | Dipeptidyl Peptidase Like 10                                                  | Protein Coding | 41 | GC02P114442 | 0.251126 | <a href="https://www.genecards.org/cgi-bin/carddisp.pl?gene=DPP10">https://www.genecards.org/cgi-bin/carddisp.pl?gene=DPP10</a>     |
| ENDOG   | Endonuclease G                                                                | Protein Coding | 41 | GC09P128818 | 0.251126 | <a href="https://www.genecards.org/cgi-bin/carddisp.pl?gene=ENDOG">https://www.genecards.org/cgi-bin/carddisp.pl?gene=ENDOG</a>     |
| RGS2    | Regulator Of G Protein Signaling 2                                            | Protein Coding | 41 | GC01P192809 | 0.251126 | <a href="https://www.genecards.org/cgi-bin/carddisp.pl?gene=RGS2">https://www.genecards.org/cgi-bin/carddisp.pl?gene=RGS2</a>       |
| SDCCAG8 | SHH Signaling And Ciliogenesis Regulator SDCCAG8                              | Protein Coding | 41 | GC01P243255 | 0.251126 | <a href="https://www.genecards.org/cgi-bin/carddisp.pl?gene=SDCCAG8">https://www.genecards.org/cgi-bin/carddisp.pl?gene=SDCCAG8</a> |
| GREM2   | Gremlin 2, DAN Family BMP Antagonist                                          | Protein Coding | 40 | GC01M240489 | 0.251126 | <a href="https://www.genecards.org/cgi-bin/carddisp.pl?gene=GREM2">https://www.genecards.org/cgi-bin/carddisp.pl?gene=GREM2</a>     |
| METTL3  | Methyltransferase 3, N6-Adenosine-Methyltransferase Complex Catalytic Subunit | Protein Coding | 40 | GC14M021498 | 0.251126 | <a href="https://www.genecards.org/cgi-bin/carddisp.pl?gene=METTL3">https://www.genecards.org/cgi-bin/carddisp.pl?gene=METTL3</a>   |
| RGS7    | Regulator Of G Protein Signaling 7                                            | Protein Coding | 40 | GC01M240767 | 0.251126 | <a href="https://www.genecards.org/cgi-bin/carddisp.pl?gene=RGS7">https://www.genecards.org/cgi-bin/carddisp.pl?gene=RGS7</a>       |
| WDFY3   | WD Repeat And FYVE Domain Containing 3                                        | Protein Coding | 40 | GC04M084669 | 0.251126 | <a href="https://www.genecards.org/cgi-bin/carddisp.pl?gene=WDFY3">https://www.genecards.org/cgi-bin/carddisp.pl?gene=WDFY3</a>     |
| ZBTB17  | Zinc Finger And BTB Domain Containing 17                                      | Protein Coding | 40 | GC01M015943 | 0.251126 | <a href="https://www.genecards.org/cgi-bin/carddisp.pl?gene=ZBTB17">https://www.genecards.org/cgi-bin/carddisp.pl?gene=ZBTB17</a>   |
| ECE2    | Endothelin Converting Enzyme 2                                                | Protein Coding | 39 | GC03P184276 | 0.251126 | <a href="https://www.genecards.org/cgi-bin/carddisp.pl?gene=ECE2">https://www.genecards.org/cgi-bin/carddisp.pl?gene=ECE2</a>       |
| TNNI3K  | TNNI3 Interacting Kinase                                                      | Protein Coding | 39 | GC01P074235 | 0.251126 | <a href="https://www.genecards.org/cgi-">https://www.genecards.org/cgi-</a>                                                         |

|          |                                                       |                |    |             |          |                                                                                                                                              |
|----------|-------------------------------------------------------|----------------|----|-------------|----------|----------------------------------------------------------------------------------------------------------------------------------------------|
|          |                                                       |                |    |             |          | <a href="http://www.ncbi.nlm.nih.gov/ncbi/cdd/bin/carddisp.pl?gene=TNNI3K">bin/carddisp.pl?gene=TNNI3K</a>                                   |
| ZNF423   | Zinc Finger Protein 423                               | Protein Coding | 39 | GC16M049487 | 0.251126 | <a href="http://www.ncbi.nlm.nih.gov/ncbi/cdd/bin/carddisp.pl?gene=TNNI3K">https://www.genecards.org/cgi-bin/carddisp.pl?gene=TNNI3K</a>     |
| AGMAT    | Agmatinase                                            | Protein Coding | 38 | GC01M015571 | 0.251126 | <a href="http://www.ncbi.nlm.nih.gov/ncbi/cdd/bin/carddisp.pl?gene=AGMAT">https://www.genecards.org/cgi-bin/carddisp.pl?gene=AGMAT</a>       |
| CD207    | CD207 Molecule                                        | Protein Coding | 38 | GC02M070830 | 0.251126 | <a href="http://www.ncbi.nlm.nih.gov/ncbi/cdd/bin/carddisp.pl?gene=CD207">https://www.genecards.org/cgi-bin/carddisp.pl?gene=CD207</a>       |
| CEP170   | Centrosomal Protein 170                               | Protein Coding | 38 | GC01M243124 | 0.251126 | <a href="http://www.ncbi.nlm.nih.gov/ncbi/cdd/bin/carddisp.pl?gene=CEP170">https://www.genecards.org/cgi-bin/carddisp.pl?gene=CEP170</a>     |
| OPN3     | Opsin 3                                               | Protein Coding | 38 | GC01M241590 | 0.251126 | <a href="http://www.ncbi.nlm.nih.gov/ncbi/cdd/bin/carddisp.pl?gene=OPN3">https://www.genecards.org/cgi-bin/carddisp.pl?gene=OPN3</a>         |
| PDPR     | Pyruvate Dehydrogenase Phosphatase Regulatory Subunit | Protein Coding | 38 | GC16P070113 | 0.251126 | <a href="http://www.ncbi.nlm.nih.gov/ncbi/cdd/bin/carddisp.pl?gene=PDPR">https://www.genecards.org/cgi-bin/carddisp.pl?gene=PDPR</a>         |
| TNFRSF19 | TNF Receptor Superfamily Member 19                    | Protein Coding | 38 | GC13P023570 | 0.251126 | <a href="http://www.ncbi.nlm.nih.gov/ncbi/cdd/bin/carddisp.pl?gene=TNFRSF19">https://www.genecards.org/cgi-bin/carddisp.pl?gene=TNFRSF19</a> |
| ATRN     | Attractin                                             | Protein Coding | 37 | GC20P003471 | 0.251126 | <a href="http://www.ncbi.nlm.nih.gov/ncbi/cdd/bin/carddisp.pl?gene=ATRN">https://www.genecards.org/cgi-bin/carddisp.pl?gene=ATRN</a>         |
| CHML     | CHM Like Rab Escort Protein                           | Protein Coding | 37 | GC01M241628 | 0.251126 | <a href="http://www.ncbi.nlm.nih.gov/ncbi/cdd/bin/carddisp.pl?gene=CHML">https://www.genecards.org/cgi-bin/carddisp.pl?gene=CHML</a>         |
| KLHL12   | Kelch Like Family Member 12                           | Protein Coding | 37 | GC01M202891 | 0.251126 | <a href="http://www.ncbi.nlm.nih.gov/ncbi/cdd/bin/carddisp.pl?gene=KLHL12">https://www.genecards.org/cgi-bin/carddisp.pl?gene=KLHL12</a>     |
| PLA2G2E  | Phospholipase A2 Group IIE                            | Protein Coding | 37 | GC01M019920 | 0.251126 | <a href="http://www.ncbi.nlm.nih.gov/ncbi/cdd/bin/carddisp.pl?gene=PLA2G2E">https://www.genecards.org/cgi-bin/carddisp.pl?gene=PLA2G2E</a>   |
| SRRM1    | Serine And Arginine Repetitive Matrix 1               | Protein Coding | 37 | GC01P024631 | 0.251126 | <a href="http://www.ncbi.nlm.nih.gov/ncbi/cdd/bin/carddisp.pl?gene=SRRM1">https://www.genecards.org/cgi-bin/carddisp.pl?gene=SRRM1</a>       |
| NRAP     | Nebulin Related Anchoring Protein                     | Protein Coding | 36 | GC10M113588 | 0.251126 | <a href="http://www.ncbi.nlm.nih.gov/ncbi/cdd/bin/carddisp.pl?gene=NRAP">https://www.genecards.org/cgi-bin/carddisp.pl?gene=NRAP</a>         |

|         |                                             |                |    |             |          |                                                                                                                                     |
|---------|---------------------------------------------|----------------|----|-------------|----------|-------------------------------------------------------------------------------------------------------------------------------------|
| RTCB    | RNA 2',3'-Cyclic Phosphate And 5'-OH Ligase | Protein Coding | 35 | GC22M032387 | 0.251126 | <a href="https://www.genecards.org/cgi-bin/carddisp.pl?gene=RTCB">https://www.genecards.org/cgi-bin/carddisp.pl?gene=RTCB</a>       |
| CCDC91  | Coiled-Coil Domain Containing 91            | Protein Coding | 34 | GC12P028133 | 0.251126 | <a href="https://www.genecards.org/cgi-bin/carddisp.pl?gene=CCDC91">https://www.genecards.org/cgi-bin/carddisp.pl?gene=CCDC91</a>   |
| METTL7B | Methyltransferase Like 7B                   | Protein Coding | 34 | GC12P055681 | 0.251126 | <a href="https://www.genecards.org/cgi-bin/carddisp.pl?gene=METTL7B">https://www.genecards.org/cgi-bin/carddisp.pl?gene=METTL7B</a> |
| WDR64   | WD Repeat Domain 64                         | Protein Coding | 30 | GC01P241652 | 0.251126 | <a href="https://www.genecards.org/cgi-bin/carddisp.pl?gene=WDR64">https://www.genecards.org/cgi-bin/carddisp.pl?gene=WDR64</a>     |
| MCCD1   | Mitochondrial Coiled-Coil Domain 1          | Protein Coding | 29 | GC06P031528 | 0.251126 | <a href="https://www.genecards.org/cgi-bin/carddisp.pl?gene=MCCD1">https://www.genecards.org/cgi-bin/carddisp.pl?gene=MCCD1</a>     |
| OVOS2   | Alpha-2-Macroglobulin Like 1 Pseudogene     | Pseudo gene    | 23 | GC12M031111 | 0.251126 | <a href="https://www.genecards.org/cgi-bin/carddisp.pl?gene=OVOS2">https://www.genecards.org/cgi-bin/carddisp.pl?gene=OVOS2</a>     |
| BCAR1   | BCAR1 Scaffold Protein, Cas Family Member   | Protein Coding | 42 | GC16M075228 | 0.241437 | <a href="https://www.genecards.org/cgi-bin/carddisp.pl?gene=BCAR1">https://www.genecards.org/cgi-bin/carddisp.pl?gene=BCAR1</a>     |
| DPP8    | Dipeptidyl Peptidase 8                      | Protein Coding | 38 | GC15M065442 | 0.241437 | <a href="https://www.genecards.org/cgi-bin/carddisp.pl?gene=DPP8">https://www.genecards.org/cgi-bin/carddisp.pl?gene=DPP8</a>       |
| C1QTNF3 | C1q And TNF Related 3                       | Protein Coding | 36 | GC05M034017 | 0.241437 | <a href="https://www.genecards.org/cgi-bin/carddisp.pl?gene=C1QTNF3">https://www.genecards.org/cgi-bin/carddisp.pl?gene=C1QTNF3</a> |
| CFL1    | Cofilin 1                                   | Protein Coding | 44 | GC11M065823 | 0.214991 | <a href="https://www.genecards.org/cgi-bin/carddisp.pl?gene=CFL1">https://www.genecards.org/cgi-bin/carddisp.pl?gene=CFL1</a>       |
| CDH2    | Cadherin 2                                  | Protein Coding | 50 | GC18M027950 | 0.213709 | <a href="https://www.genecards.org/cgi-bin/carddisp.pl?gene=CDH2">https://www.genecards.org/cgi-bin/carddisp.pl?gene=CDH2</a>       |
| BMPRI1A | Bone Morphogenetic Protein Receptor Type 1A | Protein Coding | 48 | GC10P092414 | 0.213709 | <a href="https://www.genecards.org/cgi-bin/carddisp.pl?gene=BMPRI1A">https://www.genecards.org/cgi-bin/carddisp.pl?gene=BMPRI1A</a> |
| XPO1    | Exportin 1                                  | Protein Coding | 46 | GC02M061445 | 0.213709 | <a href="https://www.genecards.org/cgi-bin/carddisp.pl?gene=XPO1">https://www.genecards.org/cgi-bin/carddisp.pl?gene=XPO1</a>       |

|         |                                                 |                |    |             |          |                                                                                                                                     |
|---------|-------------------------------------------------|----------------|----|-------------|----------|-------------------------------------------------------------------------------------------------------------------------------------|
| GALNT2  | Polypeptide N-Acetylgalactosaminyltransferase 2 | Protein Coding | 45 | GC01P230057 | 0.213709 | <a href="https://www.genecards.org/cgi-bin/carddisp.pl?gene=GALNT2">https://www.genecards.org/cgi-bin/carddisp.pl?gene=GALNT2</a>   |
| IGFBP7  | Insulin Like Growth Factor Binding Protein 7    | Protein Coding | 44 | GC04M057030 | 0.213709 | <a href="https://www.genecards.org/cgi-bin/carddisp.pl?gene=IGFBP7">https://www.genecards.org/cgi-bin/carddisp.pl?gene=IGFBP7</a>   |
| CHIA    | Chitinase Acidic                                | Protein Coding | 42 | GC01P111291 | 0.213709 | <a href="https://www.genecards.org/cgi-bin/carddisp.pl?gene=CHIA">https://www.genecards.org/cgi-bin/carddisp.pl?gene=CHIA</a>       |
| SOAT2   | Sterol O-Acyltransferase 2                      | Protein Coding | 42 | GC12P053103 | 0.213709 | <a href="https://www.genecards.org/cgi-bin/carddisp.pl?gene=SOAT2">https://www.genecards.org/cgi-bin/carddisp.pl?gene=SOAT2</a>     |
| DUT     | Deoxyuridine Triphosphatase                     | Protein Coding | 41 | GC15P048331 | 0.213709 | <a href="https://www.genecards.org/cgi-bin/carddisp.pl?gene=DUT">https://www.genecards.org/cgi-bin/carddisp.pl?gene=DUT</a>         |
| BCL2A1  | BCL2 Related Protein A1                         | Protein Coding | 39 | GC15M090460 | 0.213709 | <a href="https://www.genecards.org/cgi-bin/carddisp.pl?gene=BCL2A1">https://www.genecards.org/cgi-bin/carddisp.pl?gene=BCL2A1</a>   |
| HSPB2   | Heat Shock Protein Family B (Small) Member 2    | Protein Coding | 38 | GC11P111917 | 0.213709 | <a href="https://www.genecards.org/cgi-bin/carddisp.pl?gene=HSPB2">https://www.genecards.org/cgi-bin/carddisp.pl?gene=HSPB2</a>     |
| DNAH10  | Dynein Axonemal Heavy Chain 10                  | Protein Coding | 37 | GC12P123762 | 0.213709 | <a href="https://www.genecards.org/cgi-bin/carddisp.pl?gene=DNAH10">https://www.genecards.org/cgi-bin/carddisp.pl?gene=DNAH10</a>   |
| SLC5A12 | Solute Carrier Family 5 Member 12               | Protein Coding | 37 | GC11M026648 | 0.213709 | <a href="https://www.genecards.org/cgi-bin/carddisp.pl?gene=SLC5A12">https://www.genecards.org/cgi-bin/carddisp.pl?gene=SLC5A12</a> |
| HOXD3   | Homeobox D3                                     | Protein Coding | 36 | GC02P176136 | 0.213709 | <a href="https://www.genecards.org/cgi-bin/carddisp.pl?gene=HOXD3">https://www.genecards.org/cgi-bin/carddisp.pl?gene=HOXD3</a>     |
| GPHA2   | Glycoprotein Hormone Subunit Alpha 2            | Protein Coding | 34 | GC11M089739 | 0.213709 | <a href="https://www.genecards.org/cgi-bin/carddisp.pl?gene=GPHA2">https://www.genecards.org/cgi-bin/carddisp.pl?gene=GPHA2</a>     |
| RNASE7  | Ribonuclease A Family Member 7                  | Protein Coding | 34 | GC14P021042 | 0.213709 | <a href="https://www.genecards.org/cgi-bin/carddisp.pl?gene=RNASE7">https://www.genecards.org/cgi-bin/carddisp.pl?gene=RNASE7</a>   |
| CDK5    | Cyclin Dependent Kinase 5                       | Protein Coding | 50 | GC07M151053 | 0.177573 | <a href="https://www.genecards.org/cgi-bin/carddisp.pl?gene=CDK5">https://www.genecards.org/cgi-bin/carddisp.pl?gene=CDK5</a>       |
| ATP2A2  | ATPase Sarcoplasmic/Endoplasmic                 | Protein Coding | 49 | GC12P110280 | 0.177573 | <a href="https://www.genecards.org/cgi-bin/carddisp.pl?gene=ATP2A2">https://www.genecards.org/cgi-bin/carddisp.pl?gene=ATP2A2</a>   |

|        |                                                                                  |                |    |             |          |                                                                                                                                   |
|--------|----------------------------------------------------------------------------------|----------------|----|-------------|----------|-----------------------------------------------------------------------------------------------------------------------------------|
|        | c Reticulum Ca <sup>2+</sup> Transporting 2                                      |                |    |             |          | <a href="https://www.genecards.org/cgi-bin/carddisp.pl?gene=ATP2A2">bin/carddisp.pl?gene=ATP2A2</a>                               |
| CAD    | Carbamoyl-Phosphate Synthetase 2, Aspartate Transcarbamylase, And Dihydroorotase | Protein Coding | 48 | GC02P027217 | 0.177573 | <a href="https://www.genecards.org/cgi-bin/carddisp.pl?gene=CAD">https://www.genecards.org/cgi-bin/carddisp.pl?gene=CAD</a>       |
| DLD    | Dihydrolipoamide Dehydrogenase                                                   | Protein Coding | 48 | GC07P107890 | 0.177573 | <a href="https://www.genecards.org/cgi-bin/carddisp.pl?gene=DLD">https://www.genecards.org/cgi-bin/carddisp.pl?gene=DLD</a>       |
| DNM2   | Dynamin 2                                                                        | Protein Coding | 48 | GC19P010718 | 0.177573 | <a href="https://www.genecards.org/cgi-bin/carddisp.pl?gene=DNM2">https://www.genecards.org/cgi-bin/carddisp.pl?gene=DNM2</a>     |
| F12    | Coagulation Factor XII                                                           | Protein Coding | 48 | GC05M177402 | 0.177573 | <a href="https://www.genecards.org/cgi-bin/carddisp.pl?gene=F12">https://www.genecards.org/cgi-bin/carddisp.pl?gene=F12</a>       |
| LAMB1  | Laminin Subunit Beta 1                                                           | Protein Coding | 48 | GC07M107923 | 0.177573 | <a href="https://www.genecards.org/cgi-bin/carddisp.pl?gene=LAMB1">https://www.genecards.org/cgi-bin/carddisp.pl?gene=LAMB1</a>   |
| AHCY   | Adenosylhomocysteinase                                                           | Protein Coding | 47 | GC20M034827 | 0.177573 | <a href="https://www.genecards.org/cgi-bin/carddisp.pl?gene=AHCY">https://www.genecards.org/cgi-bin/carddisp.pl?gene=AHCY</a>     |
| USP7   | Ubiquitin Specific Peptidase 7                                                   | Protein Coding | 47 | GC16M008892 | 0.177573 | <a href="https://www.genecards.org/cgi-bin/carddisp.pl?gene=USP7">https://www.genecards.org/cgi-bin/carddisp.pl?gene=USP7</a>     |
| YWHAE  | Tyrosine 3-Monooxygenase/Tryptophan 5-Monooxygenase Activation Protein Epsilon   | Protein Coding | 47 | GC17M003080 | 0.177573 | <a href="https://www.genecards.org/cgi-bin/carddisp.pl?gene=YWHAE">https://www.genecards.org/cgi-bin/carddisp.pl?gene=YWHAE</a>   |
| ABCB11 | ATP Binding Cassette Subfamily B Member 11                                       | Protein Coding | 46 | GC02M168922 | 0.177573 | <a href="https://www.genecards.org/cgi-bin/carddisp.pl?gene=ABCB11">https://www.genecards.org/cgi-bin/carddisp.pl?gene=ABCB11</a> |
| FGR    | FGR Proto-Oncogene, Src Family Tyrosine Kinase                                   | Protein Coding | 46 | GC01M027919 | 0.177573 | <a href="https://www.genecards.org/cgi-bin/carddisp.pl?gene=FGR">https://www.genecards.org/cgi-bin/carddisp.pl?gene=FGR</a>       |
| HCK    | HCK Proto-Oncogene, Src Family Tyrosine Kinase                                   | Protein Coding | 46 | GC20P032052 | 0.177573 | <a href="https://www.genecards.org/cgi-bin/carddisp.pl?gene=HCK">https://www.genecards.org/cgi-bin/carddisp.pl?gene=HCK</a>       |
| MAP4K4 | Mitogen-Activated Protein Kinase Kinase Kinase Kinase 4                          | Protein Coding | 46 | GC02P101696 | 0.177573 | <a href="https://www.genecards.org/cgi-bin/carddisp.pl?gene=MAP4K4">https://www.genecards.org/cgi-bin/carddisp.pl?gene=MAP4K4</a> |
| OAT    | Ornithine Aminotransferase                                                       | Protein Coding | 46 | GC10M124397 | 0.177573 | <a href="https://www.genecards.org/cgi-bin/carddisp.pl?gene=OAT">https://www.genecards.org/cgi-bin/carddisp.pl?gene=OAT</a>       |

|          |                                                           |                |    |             |          |                                                                                                                                       |
|----------|-----------------------------------------------------------|----------------|----|-------------|----------|---------------------------------------------------------------------------------------------------------------------------------------|
| PROS1    | Protein S                                                 | Protein Coding | 46 | GC03M093873 | 0.177573 | <a href="https://www.genecards.org/cgi-bin/carddisp.pl?gene=PROS1">https://www.genecards.org/cgi-bin/carddisp.pl?gene=PROS1</a>       |
| RANBP2   | RAN Binding Protein 2                                     | Protein Coding | 46 | GC02P108719 | 0.177573 | <a href="https://www.genecards.org/cgi-bin/carddisp.pl?gene=RANBP2">https://www.genecards.org/cgi-bin/carddisp.pl?gene=RANBP2</a>     |
| RHO      | Rhodopsin                                                 | Protein Coding | 46 | GC03P134215 | 0.177573 | <a href="https://www.genecards.org/cgi-bin/carddisp.pl?gene=RHO">https://www.genecards.org/cgi-bin/carddisp.pl?gene=RHO</a>           |
| VLDLR    | Very Low Density Lipoprotein Receptor                     | Protein Coding | 46 | GC09P002611 | 0.177573 | <a href="https://www.genecards.org/cgi-bin/carddisp.pl?gene=VLDLR">https://www.genecards.org/cgi-bin/carddisp.pl?gene=VLDLR</a>       |
| ACLY     | ATP Citrate Lyase                                         | Protein Coding | 45 | GC17M041866 | 0.177573 | <a href="https://www.genecards.org/cgi-bin/carddisp.pl?gene=ACLY">https://www.genecards.org/cgi-bin/carddisp.pl?gene=ACLY</a>         |
| CACNA1E  | Calcium Voltage-Gated Channel Subunit Alpha1 E            | Protein Coding | 45 | GC01P181317 | 0.177573 | <a href="https://www.genecards.org/cgi-bin/carddisp.pl?gene=CACNA1E">https://www.genecards.org/cgi-bin/carddisp.pl?gene=CACNA1E</a>   |
| EIF2AK2  | Eukaryotic Translation Initiation Factor 2 Alpha Kinase 2 | Protein Coding | 45 | GC02M037099 | 0.177573 | <a href="https://www.genecards.org/cgi-bin/carddisp.pl?gene=EIF2AK2">https://www.genecards.org/cgi-bin/carddisp.pl?gene=EIF2AK2</a>   |
| GANAB    | Glucosidase II Alpha Subunit                              | Protein Coding | 45 | GC11M089627 | 0.177573 | <a href="https://www.genecards.org/cgi-bin/carddisp.pl?gene=GANAB">https://www.genecards.org/cgi-bin/carddisp.pl?gene=GANAB</a>       |
| GRM3     | Glutamate Metabotropic Receptor 3                         | Protein Coding | 45 | GC07P086643 | 0.177573 | <a href="https://www.genecards.org/cgi-bin/carddisp.pl?gene=GRM3">https://www.genecards.org/cgi-bin/carddisp.pl?gene=GRM3</a>         |
| HSPA9    | Heat Shock Protein Family A (Hsp70) Member 9              | Protein Coding | 45 | GC05M138554 | 0.177573 | <a href="https://www.genecards.org/cgi-bin/carddisp.pl?gene=HSPA9">https://www.genecards.org/cgi-bin/carddisp.pl?gene=HSPA9</a>       |
| MYH10    | Myosin Heavy Chain 10                                     | Protein Coding | 45 | GC17M008474 | 0.177573 | <a href="https://www.genecards.org/cgi-bin/carddisp.pl?gene=MYH10">https://www.genecards.org/cgi-bin/carddisp.pl?gene=MYH10</a>       |
| PSAT1    | Phosphoserine Aminotransferase 1                          | Protein Coding | 45 | GC09P078297 | 0.177573 | <a href="https://www.genecards.org/cgi-bin/carddisp.pl?gene=PSAT1">https://www.genecards.org/cgi-bin/carddisp.pl?gene=PSAT1</a>       |
| SLC25A12 | Solute Carrier Family 25 Member 12                        | Protein Coding | 45 | GC02M171783 | 0.177573 | <a href="https://www.genecards.org/cgi-bin/carddisp.pl?gene=SLC25A12">https://www.genecards.org/cgi-bin/carddisp.pl?gene=SLC25A12</a> |
| SLC25A13 | Solute Carrier Family 25 Member 13                        | Protein Coding | 45 | GC07M096120 | 0.177573 | <a href="https://www.genecards.org/cgi-bin/carddisp.pl?gene=SLC25A13">https://www.genecards.org/cgi-bin/carddisp.pl?gene=SLC25A13</a> |

|         |                                                                                       |                |    |             |          |                                                                                                                                     |
|---------|---------------------------------------------------------------------------------------|----------------|----|-------------|----------|-------------------------------------------------------------------------------------------------------------------------------------|
|         |                                                                                       |                |    |             |          | <a href="#">bin/carddisp.pl?gene=SLC25A13</a>                                                                                       |
| SLC26A3 | Solute Carrier Family 26 Member 3                                                     | Protein Coding | 45 | GC07M107765 | 0.177573 | <a href="https://www.genecards.org/cgi-bin/carddisp.pl?gene=SLC26A3">https://www.genecards.org/cgi-bin/carddisp.pl?gene=SLC26A3</a> |
| TUFM    | Tu Translation Elongation Factor, Mitochondrial                                       | Protein Coding | 45 | GC16M036978 | 0.177573 | <a href="https://www.genecards.org/cgi-bin/carddisp.pl?gene=TUFM">https://www.genecards.org/cgi-bin/carddisp.pl?gene=TUFM</a>       |
| YWHAB   | Tyrosine 3-Monooxygenase/Tryptophan 5-Monooxygenase Activation Protein Beta           | Protein Coding | 45 | GC20P044885 | 0.177573 | <a href="https://www.genecards.org/cgi-bin/carddisp.pl?gene=YWHAB">https://www.genecards.org/cgi-bin/carddisp.pl?gene=YWHAB</a>     |
| YWHAZ   | Tyrosine 3-Monooxygenase/Tryptophan 5-Monooxygenase Activation Protein Zeta           | Protein Coding | 45 | GC08M100917 | 0.177573 | <a href="https://www.genecards.org/cgi-bin/carddisp.pl?gene=YWHAZ">https://www.genecards.org/cgi-bin/carddisp.pl?gene=YWHAZ</a>     |
| ALPI    | Alkaline Phosphatase, Intestinal                                                      | Protein Coding | 44 | GC02P232456 | 0.177573 | <a href="https://www.genecards.org/cgi-bin/carddisp.pl?gene=ALPI">https://www.genecards.org/cgi-bin/carddisp.pl?gene=ALPI</a>       |
| ARAF    | A-Raf Proto-Oncogene, Serine/Threonine Kinase                                         | Protein Coding | 44 | GC0XP047572 | 0.177573 | <a href="https://www.genecards.org/cgi-bin/carddisp.pl?gene=ARAF">https://www.genecards.org/cgi-bin/carddisp.pl?gene=ARAF</a>       |
| CDK9    | Cyclin Dependent Kinase 9                                                             | Protein Coding | 44 | GC09P128023 | 0.177573 | <a href="https://www.genecards.org/cgi-bin/carddisp.pl?gene=CDK9">https://www.genecards.org/cgi-bin/carddisp.pl?gene=CDK9</a>       |
| CNTN1   | Contactin 1                                                                           | Protein Coding | 44 | GC12P040692 | 0.177573 | <a href="https://www.genecards.org/cgi-bin/carddisp.pl?gene=CNTN1">https://www.genecards.org/cgi-bin/carddisp.pl?gene=CNTN1</a>     |
| CTPS1   | CTP Synthase 1                                                                        | Protein Coding | 44 | GC01P040979 | 0.177573 | <a href="https://www.genecards.org/cgi-bin/carddisp.pl?gene=CTPS1">https://www.genecards.org/cgi-bin/carddisp.pl?gene=CTPS1</a>     |
| DDOST   | Dolichyl-Diphosphooligosaccharide --Protein Glycosyltransferase Non-Catalytic Subunit | Protein Coding | 44 | GC01M020651 | 0.177573 | <a href="https://www.genecards.org/cgi-bin/carddisp.pl?gene=DDOST">https://www.genecards.org/cgi-bin/carddisp.pl?gene=DDOST</a>     |
| DDX3X   | DEAD-Box Helicase 3 X-Linked                                                          | Protein Coding | 44 | GC0XP041333 | 0.177573 | <a href="https://www.genecards.org/cgi-bin/carddisp.pl?gene=DDX3X">https://www.genecards.org/cgi-bin/carddisp.pl?gene=DDX3X</a>     |
| EIF2B4  | Eukaryotic Translation Initiation Factor 2B Subunit Delta                             | Protein Coding | 44 | GC02M027364 | 0.177573 | <a href="https://www.genecards.org/cgi-bin/carddisp.pl?gene=EIF2B4">https://www.genecards.org/cgi-bin/carddisp.pl?gene=EIF2B4</a>   |
| EIF4A1  | Eukaryotic Translation Initiation Factor 4A1                                          | Protein Coding | 44 | GC17P007572 | 0.177573 | <a href="https://www.genecards.org/cgi-bin/carddisp.pl?gene=EIF4A1">https://www.genecards.org/cgi-bin/carddisp.pl?gene=EIF4A1</a>   |



|        |                                                |                |    |             |          |                                                                                                                                          |
|--------|------------------------------------------------|----------------|----|-------------|----------|------------------------------------------------------------------------------------------------------------------------------------------|
|        |                                                |                |    |             |          | <a href="http://www.ncbi.nlm.nih.gov/ncbi/cdd/bin/carddisp.pl?gene=EIF4A1">bin/carddisp.pl?gene=EIF4A1</a>                               |
| GFRA1  | GNDF Family Receptor Alpha 1                   | Protein Coding | 44 | GC10M116056 | 0.177573 | <a href="http://www.ncbi.nlm.nih.gov/ncbi/cdd/bin/carddisp.pl?gene=GFRA1">https://www.genecards.org/cgi-bin/carddisp.pl?gene=GFRA1</a>   |
| GNAI1  | G Protein Subunit Alpha I1                     | Protein Coding | 44 | GC07P079769 | 0.177573 | <a href="http://www.ncbi.nlm.nih.gov/ncbi/cdd/bin/carddisp.pl?gene=GNAI1">https://www.genecards.org/cgi-bin/carddisp.pl?gene=GNAI1</a>   |
| HELLS  | Helicase, Lymphoid Specific                    | Protein Coding | 44 | GC10P094501 | 0.177573 | <a href="http://www.ncbi.nlm.nih.gov/ncbi/cdd/bin/carddisp.pl?gene=HELLS">https://www.genecards.org/cgi-bin/carddisp.pl?gene=HELLS</a>   |
| KLK2   | Kallikrein Related Peptidase 2                 | Protein Coding | 44 | GC19P050861 | 0.177573 | <a href="http://www.ncbi.nlm.nih.gov/ncbi/cdd/bin/carddisp.pl?gene=KLK2">https://www.genecards.org/cgi-bin/carddisp.pl?gene=KLK2</a>     |
| MCM3   | Minichromosome Maintenance Complex Component 3 | Protein Coding | 44 | GC06M052264 | 0.177573 | <a href="http://www.ncbi.nlm.nih.gov/ncbi/cdd/bin/carddisp.pl?gene=MCM3">https://www.genecards.org/cgi-bin/carddisp.pl?gene=MCM3</a>     |
| MCM5   | Minichromosome Maintenance Complex Component 5 | Protein Coding | 44 | GC22P035400 | 0.177573 | <a href="http://www.ncbi.nlm.nih.gov/ncbi/cdd/bin/carddisp.pl?gene=MCM5">https://www.genecards.org/cgi-bin/carddisp.pl?gene=MCM5</a>     |
| MIB1   | MIB E3 Ubiquitin Protein Ligase 1              | Protein Coding | 44 | GC18P021704 | 0.177573 | <a href="http://www.ncbi.nlm.nih.gov/ncbi/cdd/bin/carddisp.pl?gene=MIB1">https://www.genecards.org/cgi-bin/carddisp.pl?gene=MIB1</a>     |
| MYL3   | Myosin Light Chain 3                           | Protein Coding | 44 | GC03M046836 | 0.177573 | <a href="http://www.ncbi.nlm.nih.gov/ncbi/cdd/bin/carddisp.pl?gene=MYL3">https://www.genecards.org/cgi-bin/carddisp.pl?gene=MYL3</a>     |
| PDHB   | Pyruvate Dehydrogenase E1 Subunit Beta         | Protein Coding | 44 | GC03M058428 | 0.177573 | <a href="http://www.ncbi.nlm.nih.gov/ncbi/cdd/bin/carddisp.pl?gene=PDHB">https://www.genecards.org/cgi-bin/carddisp.pl?gene=PDHB</a>     |
| PGRMC1 | Progesterone Receptor Membrane Component 1     | Protein Coding | 44 | GC0XP119236 | 0.177573 | <a href="http://www.ncbi.nlm.nih.gov/ncbi/cdd/bin/carddisp.pl?gene=PGRMC1">https://www.genecards.org/cgi-bin/carddisp.pl?gene=PGRMC1</a> |
| PRKD2  | Protein Kinase D2                              | Protein Coding | 44 | GC19M046674 | 0.177573 | <a href="http://www.ncbi.nlm.nih.gov/ncbi/cdd/bin/carddisp.pl?gene=PRKD2">https://www.genecards.org/cgi-bin/carddisp.pl?gene=PRKD2</a>   |
| PTGFR  | Prostaglandin F Receptor                       | Protein Coding | 44 | GC01P078303 | 0.177573 | <a href="http://www.ncbi.nlm.nih.gov/ncbi/cdd/bin/carddisp.pl?gene=PTGFR">https://www.genecards.org/cgi-bin/carddisp.pl?gene=PTGFR</a>   |
| PXN    | Paxillin                                       | Protein Coding | 44 | GC12M120210 | 0.177573 | <a href="http://www.ncbi.nlm.nih.gov/ncbi/cdd/bin/carddisp.pl?gene=PXN">https://www.genecards.org/cgi-bin/carddisp.pl?gene=PXN</a>       |

|          |                                                                  |                |    |             |          |                                                                                                                                       |
|----------|------------------------------------------------------------------|----------------|----|-------------|----------|---------------------------------------------------------------------------------------------------------------------------------------|
| SKI      | SKI Proto-Oncogene                                               | Protein Coding | 44 | GC01P002228 | 0.177573 | <a href="https://www.genecards.org/cgi-bin/carddisp.pl?gene=SKI">https://www.genecards.org/cgi-bin/carddisp.pl?gene=SKI</a>           |
| SLC27A4  | Solute Carrier Family 27 Member 4                                | Protein Coding | 44 | GC09P128340 | 0.177573 | <a href="https://www.genecards.org/cgi-bin/carddisp.pl?gene=SLC27A4">https://www.genecards.org/cgi-bin/carddisp.pl?gene=SLC27A4</a>   |
| SMC1A    | Structural Maintenance Of Chromosomes 1A                         | Protein Coding | 44 | GC0XM053374 | 0.177573 | <a href="https://www.genecards.org/cgi-bin/carddisp.pl?gene=SMC1A">https://www.genecards.org/cgi-bin/carddisp.pl?gene=SMC1A</a>       |
| SMC3     | Structural Maintenance Of Chromosomes 3                          | Protein Coding | 44 | GC10P110567 | 0.177573 | <a href="https://www.genecards.org/cgi-bin/carddisp.pl?gene=SMC3">https://www.genecards.org/cgi-bin/carddisp.pl?gene=SMC3</a>         |
| TRPM7    | Transient Receptor Potential Cation Channel Subfamily M Member 7 | Protein Coding | 44 | GC15M050552 | 0.177573 | <a href="https://www.genecards.org/cgi-bin/carddisp.pl?gene=TRPM7">https://www.genecards.org/cgi-bin/carddisp.pl?gene=TRPM7</a>       |
| TUBB4A   | Tubulin Beta 4A Class IVa                                        | Protein Coding | 44 | GC19M006496 | 0.177573 | <a href="https://www.genecards.org/cgi-bin/carddisp.pl?gene=TUBB4A">https://www.genecards.org/cgi-bin/carddisp.pl?gene=TUBB4A</a>     |
| ABCD3    | ATP Binding Cassette Subfamily D Member 3                        | Protein Coding | 43 | GC01P094385 | 0.177573 | <a href="https://www.genecards.org/cgi-bin/carddisp.pl?gene=ABCD3">https://www.genecards.org/cgi-bin/carddisp.pl?gene=ABCD3</a>       |
| ALDH18A1 | Aldehyde Dehydrogenase 18 Family Member A1                       | Protein Coding | 43 | GC10M095605 | 0.177573 | <a href="https://www.genecards.org/cgi-bin/carddisp.pl?gene=ALDH18A1">https://www.genecards.org/cgi-bin/carddisp.pl?gene=ALDH18A1</a> |
| CD151    | CD151 Molecule (Raph Blood Group)                                | Protein Coding | 43 | GC11P001795 | 0.177573 | <a href="https://www.genecards.org/cgi-bin/carddisp.pl?gene=CD151">https://www.genecards.org/cgi-bin/carddisp.pl?gene=CD151</a>       |
| CHD2     | Chromodomain Helicase DNA Binding Protein 2                      | Protein Coding | 43 | GC15P092900 | 0.177573 | <a href="https://www.genecards.org/cgi-bin/carddisp.pl?gene=CHD2">https://www.genecards.org/cgi-bin/carddisp.pl?gene=CHD2</a>         |
| CKB      | Creatine Kinase B                                                | Protein Coding | 43 | GC14M103519 | 0.177573 | <a href="https://www.genecards.org/cgi-bin/carddisp.pl?gene=CKB">https://www.genecards.org/cgi-bin/carddisp.pl?gene=CKB</a>           |
| DOCK2    | Dedicator Of Cytokinesis 2                                       | Protein Coding | 43 | GC05P169637 | 0.177573 | <a href="https://www.genecards.org/cgi-bin/carddisp.pl?gene=DOCK2">https://www.genecards.org/cgi-bin/carddisp.pl?gene=DOCK2</a>       |
| DYNC1H1  | Dynein Cytoplasmic 1 Heavy Chain 1                               | Protein Coding | 43 | GC14P109704 | 0.177573 | <a href="https://www.genecards.org/cgi-bin/carddisp.pl?gene=DYNC1H1">https://www.genecards.org/cgi-bin/carddisp.pl?gene=DYNC1H1</a>   |
| EMX2     | Empty Spiracles Homeobox 2                                       | Protein Coding | 43 | GC10P117542 | 0.177573 | <a href="https://www.genecards.org/cgi-bin/carddisp.pl?gene=EMX2">https://www.genecards.org/cgi-bin/carddisp.pl?gene=EMX2</a>         |

|         |                                                             |                |    |             |          |                                                                                                                                            |
|---------|-------------------------------------------------------------|----------------|----|-------------|----------|--------------------------------------------------------------------------------------------------------------------------------------------|
|         |                                                             |                |    |             |          | <a href="http://www.ncbi.nlm.nih.gov/ncbi/cdd/bin/carddisp.pl?gene=EMX2">bin/carddisp.pl?gene=EMX2</a>                                     |
| HIF1AN  | Hypoxia Inducible Factor 1 Subunit Alpha Inhibitor          | Protein Coding | 43 | GC10P100529 | 0.177573 | <a href="http://www.ncbi.nlm.nih.gov/ncbi/cdd/bin/carddisp.pl?gene=HIF1AN">https://www.genecards.org/cgi-bin/carddisp.pl?gene=HIF1AN</a>   |
| KLK4    | Kallikrein Related Peptidase 4                              | Protein Coding | 43 | GC19M066193 | 0.177573 | <a href="http://www.ncbi.nlm.nih.gov/ncbi/cdd/bin/carddisp.pl?gene=KLK4">https://www.genecards.org/cgi-bin/carddisp.pl?gene=KLK4</a>       |
| MCM7    | Minichromosome Maintenance Complex Component 7              | Protein Coding | 43 | GC07M100092 | 0.177573 | <a href="http://www.ncbi.nlm.nih.gov/ncbi/cdd/bin/carddisp.pl?gene=MCM7">https://www.genecards.org/cgi-bin/carddisp.pl?gene=MCM7</a>       |
| NDRG1   | N-Myc Downstream Regulated 1                                | Protein Coding | 43 | GC08M133237 | 0.177573 | <a href="http://www.ncbi.nlm.nih.gov/ncbi/cdd/bin/carddisp.pl?gene=NDRG1">https://www.genecards.org/cgi-bin/carddisp.pl?gene=NDRG1</a>     |
| RPL10   | Ribosomal Protein L10                                       | Protein Coding | 43 | GC0XP154389 | 0.177573 | <a href="http://www.ncbi.nlm.nih.gov/ncbi/cdd/bin/carddisp.pl?gene=RPL10">https://www.genecards.org/cgi-bin/carddisp.pl?gene=RPL10</a>     |
| RUVBL1  | RuvB Like AAA ATPase 1                                      | Protein Coding | 43 | GC03M128064 | 0.177573 | <a href="http://www.ncbi.nlm.nih.gov/ncbi/cdd/bin/carddisp.pl?gene=RUVBL1">https://www.genecards.org/cgi-bin/carddisp.pl?gene=RUVBL1</a>   |
| SLC25A3 | Solute Carrier Family 25 Member 3                           | Protein Coding | 43 | GC12P098593 | 0.177573 | <a href="http://www.ncbi.nlm.nih.gov/ncbi/cdd/bin/carddisp.pl?gene=SLC25A3">https://www.genecards.org/cgi-bin/carddisp.pl?gene=SLC25A3</a> |
| SMURF1  | SMAD Specific E3 Ubiquitin Protein Ligase 1                 | Protein Coding | 43 | GC07M099027 | 0.177573 | <a href="http://www.ncbi.nlm.nih.gov/ncbi/cdd/bin/carddisp.pl?gene=SMURF1">https://www.genecards.org/cgi-bin/carddisp.pl?gene=SMURF1</a>   |
| SYT2    | Synaptotagmin 2                                             | Protein Coding | 43 | GC01M202559 | 0.177573 | <a href="http://www.ncbi.nlm.nih.gov/ncbi/cdd/bin/carddisp.pl?gene=SYT2">https://www.genecards.org/cgi-bin/carddisp.pl?gene=SYT2</a>       |
| ZBTB16  | Zinc Finger And BTB Domain Containing 16                    | Protein Coding | 43 | GC11P114059 | 0.177573 | <a href="http://www.ncbi.nlm.nih.gov/ncbi/cdd/bin/carddisp.pl?gene=ZBTB16">https://www.genecards.org/cgi-bin/carddisp.pl?gene=ZBTB16</a>   |
| CRBN    | Cereblon                                                    | Protein Coding | 42 | GC03M003144 | 0.177573 | <a href="http://www.ncbi.nlm.nih.gov/ncbi/cdd/bin/carddisp.pl?gene=CRBN">https://www.genecards.org/cgi-bin/carddisp.pl?gene=CRBN</a>       |
| DLG1    | Discs Large MAGUK Scaffold Protein 1                        | Protein Coding | 42 | GC03M197042 | 0.177573 | <a href="http://www.ncbi.nlm.nih.gov/ncbi/cdd/bin/carddisp.pl?gene=DLG1">https://www.genecards.org/cgi-bin/carddisp.pl?gene=DLG1</a>       |
| DPM1    | Dolichyl-Phosphate Mannosyltransferase Subunit 1, Catalytic | Protein Coding | 42 | GC20M050934 | 0.177573 | <a href="http://www.ncbi.nlm.nih.gov/ncbi/cdd/bin/carddisp.pl?gene=DPM1">https://www.genecards.org/cgi-bin/carddisp.pl?gene=DPM1</a>       |

|         |                                                  |                |    |             |          |                                                                                                                                     |
|---------|--------------------------------------------------|----------------|----|-------------|----------|-------------------------------------------------------------------------------------------------------------------------------------|
| EEA1    | Early Endosome Antigen 1                         | Protein Coding | 42 | GC12M092770 | 0.177573 | <a href="https://www.genecards.org/cgi-bin/carddisp.pl?gene=EEA1">https://www.genecards.org/cgi-bin/carddisp.pl?gene=EEA1</a>       |
| EIF4A3  | Eukaryotic Translation Initiation Factor 4A3     | Protein Coding | 42 | GC17M080135 | 0.177573 | <a href="https://www.genecards.org/cgi-bin/carddisp.pl?gene=EIF4A3">https://www.genecards.org/cgi-bin/carddisp.pl?gene=EIF4A3</a>   |
| FUT8    | Fucosyltransferase 8                             | Protein Coding | 42 | GC14P065411 | 0.177573 | <a href="https://www.genecards.org/cgi-bin/carddisp.pl?gene=FUT8">https://www.genecards.org/cgi-bin/carddisp.pl?gene=FUT8</a>       |
| HBA2    | Hemoglobin Subunit Alpha 2                       | Protein Coding | 42 | GC16P011600 | 0.177573 | <a href="https://www.genecards.org/cgi-bin/carddisp.pl?gene=HBA2">https://www.genecards.org/cgi-bin/carddisp.pl?gene=HBA2</a>       |
| HOXA1   | Homeobox A1                                      | Protein Coding | 42 | GC07M027092 | 0.177573 | <a href="https://www.genecards.org/cgi-bin/carddisp.pl?gene=HOXA1">https://www.genecards.org/cgi-bin/carddisp.pl?gene=HOXA1</a>     |
| LRPPRC  | Leucine Rich Pentatricopeptide Repeat Containing | Protein Coding | 42 | GC02M043886 | 0.177573 | <a href="https://www.genecards.org/cgi-bin/carddisp.pl?gene=LRPPRC">https://www.genecards.org/cgi-bin/carddisp.pl?gene=LRPPRC</a>   |
| MCM6    | Minichromosome Maintenance Complex Component 6   | Protein Coding | 42 | GC02M135839 | 0.177573 | <a href="https://www.genecards.org/cgi-bin/carddisp.pl?gene=MCM6">https://www.genecards.org/cgi-bin/carddisp.pl?gene=MCM6</a>       |
| NCOR2   | Nuclear Receptor Corepressor 2                   | Protein Coding | 42 | GC12M124324 | 0.177573 | <a href="https://www.genecards.org/cgi-bin/carddisp.pl?gene=NCOR2">https://www.genecards.org/cgi-bin/carddisp.pl?gene=NCOR2</a>     |
| NOP56   | NOP56 Ribonucleoprotein                          | Protein Coding | 42 | GC20P004223 | 0.177573 | <a href="https://www.genecards.org/cgi-bin/carddisp.pl?gene=NOP56">https://www.genecards.org/cgi-bin/carddisp.pl?gene=NOP56</a>     |
| PAPPA   | Pappalysin 1                                     | Protein Coding | 42 | GC09P118958 | 0.177573 | <a href="https://www.genecards.org/cgi-bin/carddisp.pl?gene=PAPPA">https://www.genecards.org/cgi-bin/carddisp.pl?gene=PAPPA</a>     |
| PDE7A   | Phosphodiesterase 7A                             | Protein Coding | 42 | GC08M065736 | 0.177573 | <a href="https://www.genecards.org/cgi-bin/carddisp.pl?gene=PDE7A">https://www.genecards.org/cgi-bin/carddisp.pl?gene=PDE7A</a>     |
| PPP2R2A | Protein Phosphatase 2 Regulatory Subunit Balpha  | Protein Coding | 42 | GC08P026292 | 0.177573 | <a href="https://www.genecards.org/cgi-bin/carddisp.pl?gene=PPP2R2A">https://www.genecards.org/cgi-bin/carddisp.pl?gene=PPP2R2A</a> |
| PSMC3   | Proteasome 26S Subunit, ATPase 3                 | Protein Coding | 42 | GC11M089365 | 0.177573 | <a href="https://www.genecards.org/cgi-bin/carddisp.pl?gene=PSMC3">https://www.genecards.org/cgi-bin/carddisp.pl?gene=PSMC3</a>     |
| RARS2   | Arginyl-TRNA Synthetase 2, Mitochondrial         | Protein Coding | 42 | GC06M087514 | 0.177573 | <a href="https://www.genecards.org/cgi-">https://www.genecards.org/cgi-</a>                                                         |

|          |                                                    |                |    |             |          |                                                                                                                                                     |
|----------|----------------------------------------------------|----------------|----|-------------|----------|-----------------------------------------------------------------------------------------------------------------------------------------------------|
|          |                                                    |                |    |             |          | <a href="https://www.ncbi.nlm.nih.gov/ncbi/cdd/bin/cdddisp.pl?gene=RARS2">bin/cdddisp.pl?gene=RARS2</a>                                             |
| ROBO2    | Roundabout Guidance Receptor 2                     | Protein Coding | 42 | GC03P075955 | 0.177573 | <a href="https://www.ncbi.nlm.nih.gov/ncbi/cdd/bin/cdddisp.pl?gene=ROBO2">https://www.ncbi.nlm.nih.gov/ncbi/cdd/bin/cdddisp.pl?gene=ROBO2</a>       |
| RPN1     | Ribophorin I                                       | Protein Coding | 42 | GC03M128619 | 0.177573 | <a href="https://www.ncbi.nlm.nih.gov/ncbi/cdd/bin/cdddisp.pl?gene=RPN1">https://www.ncbi.nlm.nih.gov/ncbi/cdd/bin/cdddisp.pl?gene=RPN1</a>         |
| RPS3     | Ribosomal Protein S3                               | Protein Coding | 42 | GC11P077882 | 0.177573 | <a href="https://www.ncbi.nlm.nih.gov/ncbi/cdd/bin/cdddisp.pl?gene=RPS3">https://www.ncbi.nlm.nih.gov/ncbi/cdd/bin/cdddisp.pl?gene=RPS3</a>         |
| SLC1A5   | Solute Carrier Family 1 Member 5                   | Protein Coding | 42 | GC19M065991 | 0.177573 | <a href="https://www.ncbi.nlm.nih.gov/ncbi/cdd/bin/cdddisp.pl?gene=SLC1A5">https://www.ncbi.nlm.nih.gov/ncbi/cdd/bin/cdddisp.pl?gene=SLC1A5</a>     |
| SLC25A11 | Solute Carrier Family 25 Member 11                 | Protein Coding | 42 | GC17M004937 | 0.177573 | <a href="https://www.ncbi.nlm.nih.gov/ncbi/cdd/bin/cdddisp.pl?gene=SLC25A11">https://www.ncbi.nlm.nih.gov/ncbi/cdd/bin/cdddisp.pl?gene=SLC25A11</a> |
| SLC25A5  | Solute Carrier Family 25 Member 5                  | Protein Coding | 42 | GC0XP119468 | 0.177573 | <a href="https://www.ncbi.nlm.nih.gov/ncbi/cdd/bin/cdddisp.pl?gene=SLC25A5">https://www.ncbi.nlm.nih.gov/ncbi/cdd/bin/cdddisp.pl?gene=SLC25A5</a>   |
| SLIT1    | Slit Guidance Ligand 1                             | Protein Coding | 42 | GC10M096998 | 0.177573 | <a href="https://www.ncbi.nlm.nih.gov/ncbi/cdd/bin/cdddisp.pl?gene=SLIT1">https://www.ncbi.nlm.nih.gov/ncbi/cdd/bin/cdddisp.pl?gene=SLIT1</a>       |
| SNRNP200 | Small Nuclear Ribonucleoprotein U5 Subunit 200     | Protein Coding | 42 | GC02M098261 | 0.177573 | <a href="https://www.ncbi.nlm.nih.gov/ncbi/cdd/bin/cdddisp.pl?gene=SNRNP200">https://www.ncbi.nlm.nih.gov/ncbi/cdd/bin/cdddisp.pl?gene=SNRNP200</a> |
| ST6GAL1  | ST6 Beta-Galactoside Alpha-2,6-Sialyltransferase 1 | Protein Coding | 42 | GC03P186930 | 0.177573 | <a href="https://www.ncbi.nlm.nih.gov/ncbi/cdd/bin/cdddisp.pl?gene=ST6GAL1">https://www.ncbi.nlm.nih.gov/ncbi/cdd/bin/cdddisp.pl?gene=ST6GAL1</a>   |
| TSPAN7   | Tetraspanin 7                                      | Protein Coding | 42 | GC0XP038561 | 0.177573 | <a href="https://www.ncbi.nlm.nih.gov/ncbi/cdd/bin/cdddisp.pl?gene=TSPAN7">https://www.ncbi.nlm.nih.gov/ncbi/cdd/bin/cdddisp.pl?gene=TSPAN7</a>     |
| TUBB4B   | Tubulin Beta 4B Class IVb                          | Protein Coding | 42 | GC09P137241 | 0.177573 | <a href="https://www.ncbi.nlm.nih.gov/ncbi/cdd/bin/cdddisp.pl?gene=TUBB4B">https://www.ncbi.nlm.nih.gov/ncbi/cdd/bin/cdddisp.pl?gene=TUBB4B</a>     |
| VDAC2    | Voltage Dependent Anion Channel 2                  | Protein Coding | 42 | GC10P075210 | 0.177573 | <a href="https://www.ncbi.nlm.nih.gov/ncbi/cdd/bin/cdddisp.pl?gene=VDAC2">https://www.ncbi.nlm.nih.gov/ncbi/cdd/bin/cdddisp.pl?gene=VDAC2</a>       |
| ADCYAP1  | Adenylate Cyclase Activating Polypeptide 1         | Protein Coding | 41 | GC18P000895 | 0.177573 | <a href="https://www.ncbi.nlm.nih.gov/ncbi/cdd/bin/cdddisp.pl?gene=ADCYAP1">https://www.ncbi.nlm.nih.gov/ncbi/cdd/bin/cdddisp.pl?gene=ADCYAP1</a>   |

|        |                                                        |                |    |             |          |                                                                                                                                   |
|--------|--------------------------------------------------------|----------------|----|-------------|----------|-----------------------------------------------------------------------------------------------------------------------------------|
| ATXN10 | Ataxin 10                                              | Protein Coding | 41 | GC22P045673 | 0.177573 | <a href="https://www.genecards.org/cgi-bin/carddisp.pl?gene=ATXN10">https://www.genecards.org/cgi-bin/carddisp.pl?gene=ATXN10</a> |
| CACNB1 | Calcium Voltage-Gated Channel Auxiliary Subunit Beta 1 | Protein Coding | 41 | GC17M039173 | 0.177573 | <a href="https://www.genecards.org/cgi-bin/carddisp.pl?gene=CACNB1">https://www.genecards.org/cgi-bin/carddisp.pl?gene=CACNB1</a> |
| CADPS  | Calcium Dependent Secretion Activator                  | Protein Coding | 41 | GC03M062398 | 0.177573 | <a href="https://www.genecards.org/cgi-bin/carddisp.pl?gene=CADPS">https://www.genecards.org/cgi-bin/carddisp.pl?gene=CADPS</a>   |
| CCT7   | Chaperonin Containing TCP1 Subunit 7                   | Protein Coding | 41 | GC02P073233 | 0.177573 | <a href="https://www.genecards.org/cgi-bin/carddisp.pl?gene=CCT7">https://www.genecards.org/cgi-bin/carddisp.pl?gene=CCT7</a>     |
| CD82   | CD82 Molecule                                          | Protein Coding | 41 | GC11P044586 | 0.177573 | <a href="https://www.genecards.org/cgi-bin/carddisp.pl?gene=CD82">https://www.genecards.org/cgi-bin/carddisp.pl?gene=CD82</a>     |
| CHKA   | Choline Kinase Alpha                                   | Protein Coding | 41 | GC11M068052 | 0.177573 | <a href="https://www.genecards.org/cgi-bin/carddisp.pl?gene=CHKA">https://www.genecards.org/cgi-bin/carddisp.pl?gene=CHKA</a>     |
| CYFIP2 | Cytoplasmic FMR1 Interacting Protein 2                 | Protein Coding | 41 | GC05P157267 | 0.177573 | <a href="https://www.genecards.org/cgi-bin/carddisp.pl?gene=CYFIP2">https://www.genecards.org/cgi-bin/carddisp.pl?gene=CYFIP2</a> |
| DUSP10 | Dual Specificity Phosphatase 10                        | Protein Coding | 41 | GC01M221701 | 0.177573 | <a href="https://www.genecards.org/cgi-bin/carddisp.pl?gene=DUSP10">https://www.genecards.org/cgi-bin/carddisp.pl?gene=DUSP10</a> |
| EFTUD2 | Elongation Factor Tu GTP Binding Domain Containing 2   | Protein Coding | 41 | GC17M044952 | 0.177573 | <a href="https://www.genecards.org/cgi-bin/carddisp.pl?gene=EFTUD2">https://www.genecards.org/cgi-bin/carddisp.pl?gene=EFTUD2</a> |
| EIF3A  | Eukaryotic Translation Initiation Factor 3 Subunit A   | Protein Coding | 41 | GC10M119034 | 0.177573 | <a href="https://www.genecards.org/cgi-bin/carddisp.pl?gene=EIF3A">https://www.genecards.org/cgi-bin/carddisp.pl?gene=EIF3A</a>   |
| FUT6   | Fucosyltransferase 6                                   | Protein Coding | 41 | GC19M005830 | 0.177573 | <a href="https://www.genecards.org/cgi-bin/carddisp.pl?gene=FUT6">https://www.genecards.org/cgi-bin/carddisp.pl?gene=FUT6</a>     |
| GPM6A  | Glycoprotein M6A                                       | Protein Coding | 41 | GC04M175632 | 0.177573 | <a href="https://www.genecards.org/cgi-bin/carddisp.pl?gene=GPM6A">https://www.genecards.org/cgi-bin/carddisp.pl?gene=GPM6A</a>   |
| GPSM2  | G Protein Signaling Modulator 2                        | Protein Coding | 41 | GC01P108875 | 0.177573 | <a href="https://www.genecards.org/cgi-bin/carddisp.pl?gene=GPSM2">https://www.genecards.org/cgi-bin/carddisp.pl?gene=GPSM2</a>   |
| KLK15  | Kallikrein Related Peptidase 15                        | Protein Coding | 41 | GC19M050825 | 0.177573 | <a href="https://www.genecards.org/cgi-">https://www.genecards.org/cgi-</a>                                                       |

|        |                                                                                                      |                |    |             |          |                                                                                                                                          |
|--------|------------------------------------------------------------------------------------------------------|----------------|----|-------------|----------|------------------------------------------------------------------------------------------------------------------------------------------|
|        |                                                                                                      |                |    |             |          | <a href="http://www.ncbi.nlm.nih.gov/ncbi/cdd/bin/carddisp.pl?gene=KLK15">bin/carddisp.pl?gene=KLK15</a>                                 |
| LRP1B  | LDL Receptor Related Protein 1B                                                                      | Protein Coding | 41 | GC02M140231 | 0.177573 | <a href="http://www.ncbi.nlm.nih.gov/ncbi/cdd/bin/carddisp.pl?gene=LRP1B">https://www.genecards.org/cgi-bin/carddisp.pl?gene=LRP1B</a>   |
| MLYCD  | Malonyl-CoA Decarboxylase                                                                            | Protein Coding | 41 | GC16P083899 | 0.177573 | <a href="http://www.ncbi.nlm.nih.gov/ncbi/cdd/bin/carddisp.pl?gene=MLYCD">https://www.genecards.org/cgi-bin/carddisp.pl?gene=MLYCD</a>   |
| MSRB3  | Methionine Sulfoxide Reductase B3                                                                    | Protein Coding | 41 | GC12P065279 | 0.177573 | <a href="http://www.ncbi.nlm.nih.gov/ncbi/cdd/bin/carddisp.pl?gene=MSRB3">https://www.genecards.org/cgi-bin/carddisp.pl?gene=MSRB3</a>   |
| NRG3   | Neuregulin 3                                                                                         | Protein Coding | 41 | GC10P092362 | 0.177573 | <a href="http://www.ncbi.nlm.nih.gov/ncbi/cdd/bin/carddisp.pl?gene=NRG3">https://www.genecards.org/cgi-bin/carddisp.pl?gene=NRG3</a>     |
| NRXN3  | Neurexin 3                                                                                           | Protein Coding | 41 | GC14P078170 | 0.177573 | <a href="http://www.ncbi.nlm.nih.gov/ncbi/cdd/bin/carddisp.pl?gene=NRXN3">https://www.genecards.org/cgi-bin/carddisp.pl?gene=NRXN3</a>   |
| PAICS  | Phosphoribosylaminoimidazole Carboxylase And Phosphoribosylaminoimidazolesuccinocarboxamide Synthase | Protein Coding | 41 | GC04P056410 | 0.177573 | <a href="http://www.ncbi.nlm.nih.gov/ncbi/cdd/bin/carddisp.pl?gene=PAICS">https://www.genecards.org/cgi-bin/carddisp.pl?gene=PAICS</a>   |
| PHB2   | Prohibitin 2                                                                                         | Protein Coding | 41 | GC12M006965 | 0.177573 | <a href="http://www.ncbi.nlm.nih.gov/ncbi/cdd/bin/carddisp.pl?gene=PHB2">https://www.genecards.org/cgi-bin/carddisp.pl?gene=PHB2</a>     |
| PLXND1 | Plexin D1                                                                                            | Protein Coding | 41 | GC03M129555 | 0.177573 | <a href="http://www.ncbi.nlm.nih.gov/ncbi/cdd/bin/carddisp.pl?gene=PLXND1">https://www.genecards.org/cgi-bin/carddisp.pl?gene=PLXND1</a> |
| PRPF8  | Pre-mRNA Processing Factor 8                                                                         | Protein Coding | 41 | GC17M001650 | 0.177573 | <a href="http://www.ncbi.nlm.nih.gov/ncbi/cdd/bin/carddisp.pl?gene=PRPF8">https://www.genecards.org/cgi-bin/carddisp.pl?gene=PRPF8</a>   |
| PUF60  | Poly(U) Binding Splicing Factor 60                                                                   | Protein Coding | 41 | GC08M143816 | 0.177573 | <a href="http://www.ncbi.nlm.nih.gov/ncbi/cdd/bin/carddisp.pl?gene=PUF60">https://www.genecards.org/cgi-bin/carddisp.pl?gene=PUF60</a>   |
| RBX1   | Ring-Box 1                                                                                           | Protein Coding | 41 | GC22P040951 | 0.177573 | <a href="http://www.ncbi.nlm.nih.gov/ncbi/cdd/bin/carddisp.pl?gene=RBX1">https://www.genecards.org/cgi-bin/carddisp.pl?gene=RBX1</a>     |
| RPL7A  | Ribosomal Protein L7a                                                                                | Protein Coding | 41 | GC09P133348 | 0.177573 | <a href="http://www.ncbi.nlm.nih.gov/ncbi/cdd/bin/carddisp.pl?gene=RPL7A">https://www.genecards.org/cgi-bin/carddisp.pl?gene=RPL7A</a>   |
| RPS15A | Ribosomal Protein S15a                                                                               | Protein Coding | 41 | GC16M018781 | 0.177573 | <a href="http://www.ncbi.nlm.nih.gov/ncbi/cdd/bin/carddisp.pl?gene=RPS15A">https://www.genecards.org/cgi-</a>                            |

|        |                                          |                |    |             |          |                                                                                                                                   |
|--------|------------------------------------------|----------------|----|-------------|----------|-----------------------------------------------------------------------------------------------------------------------------------|
|        |                                          |                |    |             |          | <a href="#">bin/carddisp.pl?gene=RPS15A</a>                                                                                       |
| RPS27  | Ribosomal Protein S27                    | Protein Coding | 41 | GC01P153991 | 0.177573 | <a href="https://www.genecards.org/cgi-bin/carddisp.pl?gene=RPS27">https://www.genecards.org/cgi-bin/carddisp.pl?gene=RPS27</a>   |
| SBF1   | SET Binding Factor 1                     | Protein Coding | 41 | GC22M057734 | 0.177573 | <a href="https://www.genecards.org/cgi-bin/carddisp.pl?gene=SBF1">https://www.genecards.org/cgi-bin/carddisp.pl?gene=SBF1</a>     |
| SEPHS1 | Selenophosphate Synthetase 1             | Protein Coding | 41 | GC10M013317 | 0.177573 | <a href="https://www.genecards.org/cgi-bin/carddisp.pl?gene=SEPHS1">https://www.genecards.org/cgi-bin/carddisp.pl?gene=SEPHS1</a> |
| SMYD2  | SET And MYND Domain Containing 2         | Protein Coding | 41 | GC01P214281 | 0.177573 | <a href="https://www.genecards.org/cgi-bin/carddisp.pl?gene=SMYD2">https://www.genecards.org/cgi-bin/carddisp.pl?gene=SMYD2</a>   |
| TRIM28 | Tripartite Motif Containing 28           | Protein Coding | 41 | GC19P058544 | 0.177573 | <a href="https://www.genecards.org/cgi-bin/carddisp.pl?gene=TRIM28">https://www.genecards.org/cgi-bin/carddisp.pl?gene=TRIM28</a> |
| TUBA1B | Tubulin Alpha 1b                         | Protein Coding | 41 | GC12M049127 | 0.177573 | <a href="https://www.genecards.org/cgi-bin/carddisp.pl?gene=TUBA1B">https://www.genecards.org/cgi-bin/carddisp.pl?gene=TUBA1B</a> |
| TUBA1C | Tubulin Alpha 1c                         | Protein Coding | 41 | GC12P049188 | 0.177573 | <a href="https://www.genecards.org/cgi-bin/carddisp.pl?gene=TUBA1C">https://www.genecards.org/cgi-bin/carddisp.pl?gene=TUBA1C</a> |
| UBE2T  | Ubiquitin Conjugating Enzyme E2 T        | Protein Coding | 41 | GC01M202332 | 0.177573 | <a href="https://www.genecards.org/cgi-bin/carddisp.pl?gene=UBE2T">https://www.genecards.org/cgi-bin/carddisp.pl?gene=UBE2T</a>   |
| VAV2   | Vav Guanine Nucleotide Exchange Factor 2 | Protein Coding | 41 | GC09M133761 | 0.177573 | <a href="https://www.genecards.org/cgi-bin/carddisp.pl?gene=VAV2">https://www.genecards.org/cgi-bin/carddisp.pl?gene=VAV2</a>     |
| ADAM28 | ADAM Metallopeptidase Domain 28          | Protein Coding | 40 | GC08P024294 | 0.177573 | <a href="https://www.genecards.org/cgi-bin/carddisp.pl?gene=ADAM28">https://www.genecards.org/cgi-bin/carddisp.pl?gene=ADAM28</a> |
| ARF4   | ADP Ribosylation Factor 4                | Protein Coding | 40 | GC03M057572 | 0.177573 | <a href="https://www.genecards.org/cgi-bin/carddisp.pl?gene=ARF4">https://www.genecards.org/cgi-bin/carddisp.pl?gene=ARF4</a>     |
| ARR3   | Arrestin 3                               | Protein Coding | 40 | GC0XP070269 | 0.177573 | <a href="https://www.genecards.org/cgi-bin/carddisp.pl?gene=ARR3">https://www.genecards.org/cgi-bin/carddisp.pl?gene=ARR3</a>     |
| ATAD3A | ATPase Family AAA Domain Containing 3A   | Protein Coding | 40 | GC01P003886 | 0.177573 | <a href="https://www.genecards.org/cgi-bin/carddisp.pl?gene=ATAD3A">https://www.genecards.org/cgi-bin/carddisp.pl?gene=ATAD3A</a> |



|          |                                                              |                |    |             |          |                                                                                                                                       |
|----------|--------------------------------------------------------------|----------------|----|-------------|----------|---------------------------------------------------------------------------------------------------------------------------------------|
| AUTS2    | Activator Of Transcription And Developmental Regulator AUTS2 | Protein Coding | 40 | GC07P069598 | 0.177573 | <a href="https://www.genecards.org/cgi-bin/carddisp.pl?gene=AUTS2">https://www.genecards.org/cgi-bin/carddisp.pl?gene=AUTS2</a>       |
| CCT4     | Chaperonin Containing TCP1 Subunit 4                         | Protein Coding | 40 | GC02M061868 | 0.177573 | <a href="https://www.genecards.org/cgi-bin/carddisp.pl?gene=CCT4">https://www.genecards.org/cgi-bin/carddisp.pl?gene=CCT4</a>         |
| CD300A   | CD300a Molecule                                              | Protein Coding | 40 | GC17P074466 | 0.177573 | <a href="https://www.genecards.org/cgi-bin/carddisp.pl?gene=CD300A">https://www.genecards.org/cgi-bin/carddisp.pl?gene=CD300A</a>     |
| CDC37    | Cell Division Cycle 37, HSP90 Cochaperone                    | Protein Coding | 40 | GC19M010391 | 0.177573 | <a href="https://www.genecards.org/cgi-bin/carddisp.pl?gene=CDC37">https://www.genecards.org/cgi-bin/carddisp.pl?gene=CDC37</a>       |
| CFHR3    | Complement Factor H Related 3                                | Protein Coding | 40 | GC01P196774 | 0.177573 | <a href="https://www.genecards.org/cgi-bin/carddisp.pl?gene=CFHR3">https://www.genecards.org/cgi-bin/carddisp.pl?gene=CFHR3</a>       |
| CNOT1    | CCR4-NOT Transcription Complex Subunit 1                     | Protein Coding | 40 | GC16M058519 | 0.177573 | <a href="https://www.genecards.org/cgi-bin/carddisp.pl?gene=CNOT1">https://www.genecards.org/cgi-bin/carddisp.pl?gene=CNOT1</a>       |
| COIL     | Coilin                                                       | Protein Coding | 40 | GC17M056938 | 0.177573 | <a href="https://www.genecards.org/cgi-bin/carddisp.pl?gene=COIL">https://www.genecards.org/cgi-bin/carddisp.pl?gene=COIL</a>         |
| ERP44    | Endoplasmic Reticulum Protein 44                             | Protein Coding | 40 | GC09M099979 | 0.177573 | <a href="https://www.genecards.org/cgi-bin/carddisp.pl?gene=ERP44">https://www.genecards.org/cgi-bin/carddisp.pl?gene=ERP44</a>       |
| FANCI    | FA Complementation Group I                                   | Protein Coding | 40 | GC15P089243 | 0.177573 | <a href="https://www.genecards.org/cgi-bin/carddisp.pl?gene=FANCI">https://www.genecards.org/cgi-bin/carddisp.pl?gene=FANCI</a>       |
| FOSB     | FosB Proto-Oncogene, AP-1 Transcription Factor Subunit       | Protein Coding | 40 | GC19P045467 | 0.177573 | <a href="https://www.genecards.org/cgi-bin/carddisp.pl?gene=FOSB">https://www.genecards.org/cgi-bin/carddisp.pl?gene=FOSB</a>         |
| HSD17B12 | Hydroxysteroid 17-Beta Dehydrogenase 12                      | Protein Coding | 40 | GC11P043652 | 0.177573 | <a href="https://www.genecards.org/cgi-bin/carddisp.pl?gene=HSD17B12">https://www.genecards.org/cgi-bin/carddisp.pl?gene=HSD17B12</a> |
| KTN1     | Kinectin 1                                                   | Protein Coding | 40 | GC14P055559 | 0.177573 | <a href="https://www.genecards.org/cgi-bin/carddisp.pl?gene=KTN1">https://www.genecards.org/cgi-bin/carddisp.pl?gene=KTN1</a>         |
| LPO      | Lactoperoxidase                                              | Protein Coding | 40 | GC17P058218 | 0.177573 | <a href="https://www.genecards.org/cgi-bin/carddisp.pl?gene=LPO">https://www.genecards.org/cgi-bin/carddisp.pl?gene=LPO</a>           |
| LRRC32   | Leucine Rich Repeat Containing 32                            | Protein Coding | 40 | GC11M076657 | 0.177573 | <a href="https://www.genecards.org/cgi-">https://www.genecards.org/cgi-</a>                                                           |

|         |                                                                  |                |    |             |          |                                                                                                                                     |
|---------|------------------------------------------------------------------|----------------|----|-------------|----------|-------------------------------------------------------------------------------------------------------------------------------------|
|         |                                                                  |                |    |             |          | <a href="#">bin/carddisp.pl?gene=LRR32</a>                                                                                          |
| MTHFD1L | Methylenetetrahydrofolate Dehydrogenase (NADP+ Dependent) 1 Like | Protein Coding | 40 | GC06P150865 | 0.177573 | <a href="https://www.genecards.org/cgi-bin/carddisp.pl?gene=MTHFD1L">https://www.genecards.org/cgi-bin/carddisp.pl?gene=MTHFD1L</a> |
| NCAPD3  | Non-SMC Condensin II Complex Subunit D3                          | Protein Coding | 40 | GC11M134150 | 0.177573 | <a href="https://www.genecards.org/cgi-bin/carddisp.pl?gene=NCAPD3">https://www.genecards.org/cgi-bin/carddisp.pl?gene=NCAPD3</a>   |
| NMBR    | Neuromedin B Receptor                                            | Protein Coding | 40 | GC06M142059 | 0.177573 | <a href="https://www.genecards.org/cgi-bin/carddisp.pl?gene=NMBR">https://www.genecards.org/cgi-bin/carddisp.pl?gene=NMBR</a>       |
| NSMAF   | Neutral Sphingomyelinase Activation Associated Factor            | Protein Coding | 40 | GC08M058569 | 0.177573 | <a href="https://www.genecards.org/cgi-bin/carddisp.pl?gene=NSMAF">https://www.genecards.org/cgi-bin/carddisp.pl?gene=NSMAF</a>     |
| PARD6A  | Par-6 Family Cell Polarity Regulator Alpha                       | Protein Coding | 40 | GC16P067661 | 0.177573 | <a href="https://www.genecards.org/cgi-bin/carddisp.pl?gene=PARD6A">https://www.genecards.org/cgi-bin/carddisp.pl?gene=PARD6A</a>   |
| PCBP2   | Poly(RC) Binding Protein 2                                       | Protein Coding | 40 | GC12P053452 | 0.177573 | <a href="https://www.genecards.org/cgi-bin/carddisp.pl?gene=PCBP2">https://www.genecards.org/cgi-bin/carddisp.pl?gene=PCBP2</a>     |
| PDSS2   | Decaprenyl Diphosphate Synthase Subunit 2                        | Protein Coding | 40 | GC06M107152 | 0.177573 | <a href="https://www.genecards.org/cgi-bin/carddisp.pl?gene=PDSS2">https://www.genecards.org/cgi-bin/carddisp.pl?gene=PDSS2</a>     |
| PRMT3   | Protein Arginine Methyltransferase 3                             | Protein Coding | 40 | GC11P020409 | 0.177573 | <a href="https://www.genecards.org/cgi-bin/carddisp.pl?gene=PRMT3">https://www.genecards.org/cgi-bin/carddisp.pl?gene=PRMT3</a>     |
| RPLP2   | Ribosomal Protein Lateral Stalk Subunit P2                       | Protein Coding | 40 | GC11P001790 | 0.177573 | <a href="https://www.genecards.org/cgi-bin/carddisp.pl?gene=RPLP2">https://www.genecards.org/cgi-bin/carddisp.pl?gene=RPLP2</a>     |
| RPS3A   | Ribosomal Protein S3A                                            | Protein Coding | 40 | GC04P151099 | 0.177573 | <a href="https://www.genecards.org/cgi-bin/carddisp.pl?gene=RPS3A">https://www.genecards.org/cgi-bin/carddisp.pl?gene=RPS3A</a>     |
| SOX11   | SRY-Box Transcription Factor 11                                  | Protein Coding | 40 | GC02P005703 | 0.177573 | <a href="https://www.genecards.org/cgi-bin/carddisp.pl?gene=SOX11">https://www.genecards.org/cgi-bin/carddisp.pl?gene=SOX11</a>     |
| SRSF1   | Serine And Arginine Rich Splicing Factor 1                       | Protein Coding | 40 | GC17M058000 | 0.177573 | <a href="https://www.genecards.org/cgi-bin/carddisp.pl?gene=SRSF1">https://www.genecards.org/cgi-bin/carddisp.pl?gene=SRSF1</a>     |
| SRSF2   | Serine And Arginine Rich Splicing Factor 2                       | Protein Coding | 40 | GC17M076734 | 0.177573 | <a href="https://www.genecards.org/cgi-bin/carddisp.pl?gene=SRSF2">https://www.genecards.org/cgi-bin/carddisp.pl?gene=SRSF2</a>     |

|         |                                           |                |    |             |          |                                                                                                                                     |
|---------|-------------------------------------------|----------------|----|-------------|----------|-------------------------------------------------------------------------------------------------------------------------------------|
| TLN1    | Talin 1                                   | Protein Coding | 40 | GC09M035696 | 0.177573 | <a href="https://www.genecards.org/cgi-bin/carddisp.pl?gene=TLN1">https://www.genecards.org/cgi-bin/carddisp.pl?gene=TLN1</a>       |
| TRIP13  | Thyroid Hormone Receptor Interactor 13    | Protein Coding | 40 | GC05P000892 | 0.177573 | <a href="https://www.genecards.org/cgi-bin/carddisp.pl?gene=TRIP13">https://www.genecards.org/cgi-bin/carddisp.pl?gene=TRIP13</a>   |
| TUBB6   | Tubulin Beta 6 Class V                    | Protein Coding | 40 | GC18P012307 | 0.177573 | <a href="https://www.genecards.org/cgi-bin/carddisp.pl?gene=TUBB6">https://www.genecards.org/cgi-bin/carddisp.pl?gene=TUBB6</a>     |
| USP22   | Ubiquitin Specific Peptidase 22           | Protein Coding | 40 | GC17M020999 | 0.177573 | <a href="https://www.genecards.org/cgi-bin/carddisp.pl?gene=USP22">https://www.genecards.org/cgi-bin/carddisp.pl?gene=USP22</a>     |
| XPOT    | Exportin For TRNA                         | Protein Coding | 40 | GC12P064404 | 0.177573 | <a href="https://www.genecards.org/cgi-bin/carddisp.pl?gene=XPOT">https://www.genecards.org/cgi-bin/carddisp.pl?gene=XPOT</a>       |
| ALDH1L2 | Aldehyde Dehydrogenase 1 Family Member L2 | Protein Coding | 39 | GC12M105019 | 0.177573 | <a href="https://www.genecards.org/cgi-bin/carddisp.pl?gene=ALDH1L2">https://www.genecards.org/cgi-bin/carddisp.pl?gene=ALDH1L2</a> |
| CCT6A   | Chaperonin Containing TCP1 Subunit 6A     | Protein Coding | 39 | GC07P056051 | 0.177573 | <a href="https://www.genecards.org/cgi-bin/carddisp.pl?gene=CCT6A">https://www.genecards.org/cgi-bin/carddisp.pl?gene=CCT6A</a>     |
| CCT8    | Chaperonin Containing TCP1 Subunit 8      | Protein Coding | 39 | GC21M029055 | 0.177573 | <a href="https://www.genecards.org/cgi-bin/carddisp.pl?gene=CCT8">https://www.genecards.org/cgi-bin/carddisp.pl?gene=CCT8</a>       |
| CSE1L   | Chromosome Segregation 1 Like             | Protein Coding | 39 | GC20P049046 | 0.177573 | <a href="https://www.genecards.org/cgi-bin/carddisp.pl?gene=CSE1L">https://www.genecards.org/cgi-bin/carddisp.pl?gene=CSE1L</a>     |
| CST6    | Cystatin E/M                              | Protein Coding | 39 | GC11P070022 | 0.177573 | <a href="https://www.genecards.org/cgi-bin/carddisp.pl?gene=CST6">https://www.genecards.org/cgi-bin/carddisp.pl?gene=CST6</a>       |
| DNER    | Delta/Notch Like EGF Repeat Containing    | Protein Coding | 39 | GC02M229357 | 0.177573 | <a href="https://www.genecards.org/cgi-bin/carddisp.pl?gene=DNER">https://www.genecards.org/cgi-bin/carddisp.pl?gene=DNER</a>       |
| IPO5    | Importin 5                                | Protein Coding | 39 | GC13P097953 | 0.177573 | <a href="https://www.genecards.org/cgi-bin/carddisp.pl?gene=IPO5">https://www.genecards.org/cgi-bin/carddisp.pl?gene=IPO5</a>       |
| IRS4    | Insulin Receptor Substrate 4              | Protein Coding | 39 | GC0XM108720 | 0.177573 | <a href="https://www.genecards.org/cgi-bin/carddisp.pl?gene=IRS4">https://www.genecards.org/cgi-bin/carddisp.pl?gene=IRS4</a>       |
| MYBBP1A | MYB Binding Protein 1a                    | Protein Coding | 39 | GC17M004538 | 0.177573 | <a href="https://www.genecards.org/cgi-">https://www.genecards.org/cgi-</a>                                                         |

|           |                                                                                                   |                |    |             |          |                                                                                                                                                         |
|-----------|---------------------------------------------------------------------------------------------------|----------------|----|-------------|----------|---------------------------------------------------------------------------------------------------------------------------------------------------------|
|           |                                                                                                   |                |    |             |          | <a href="https://www.ncbi.nlm.nih.gov/ncbi/cdd/bin/carddisp.pl?gene=MYBBP1A">bin/carddisp.pl?gene=MYBBP1A</a>                                           |
| NXF1      | Nuclear RNA Export Factor 1                                                                       | Protein Coding | 39 | GC11M089638 | 0.177573 | <a href="https://www.ncbi.nlm.nih.gov/ncbi/cdd/bin/carddisp.pl?gene=NXF1">https://www.ncbi.nlm.nih.gov/ncbi/cdd/bin/carddisp.pl?gene=NXF1</a>           |
| RAB11FIP2 | RAB11 Family Interacting Protein 2                                                                | Protein Coding | 39 | GC10M118004 | 0.177573 | <a href="https://www.ncbi.nlm.nih.gov/ncbi/cdd/bin/carddisp.pl?gene=RAB11FIP2">https://www.ncbi.nlm.nih.gov/ncbi/cdd/bin/carddisp.pl?gene=RAB11FIP2</a> |
| RAB5C     | RAB5C, Member RAS Oncogene Family                                                                 | Protein Coding | 39 | GC17M042124 | 0.177573 | <a href="https://www.ncbi.nlm.nih.gov/ncbi/cdd/bin/carddisp.pl?gene=RAB5C">https://www.ncbi.nlm.nih.gov/ncbi/cdd/bin/carddisp.pl?gene=RAB5C</a>         |
| RCN2      | Reticulocalbin 2                                                                                  | Protein Coding | 39 | GC15P076931 | 0.177573 | <a href="https://www.ncbi.nlm.nih.gov/ncbi/cdd/bin/carddisp.pl?gene=RCN2">https://www.ncbi.nlm.nih.gov/ncbi/cdd/bin/carddisp.pl?gene=RCN2</a>           |
| SMARCD3   | SWI/SNF Related, Matrix Associated, Actin Dependent Regulator Of Chromatin, Subfamily D, Member 3 | Protein Coding | 39 | GC07M151238 | 0.177573 | <a href="https://www.ncbi.nlm.nih.gov/ncbi/cdd/bin/carddisp.pl?gene=SMARCD3">https://www.ncbi.nlm.nih.gov/ncbi/cdd/bin/carddisp.pl?gene=SMARCD3</a>     |
| UBE3C     | Ubiquitin Protein Ligase E3C                                                                      | Protein Coding | 39 | GC07P157138 | 0.177573 | <a href="https://www.ncbi.nlm.nih.gov/ncbi/cdd/bin/carddisp.pl?gene=UBE3C">https://www.ncbi.nlm.nih.gov/ncbi/cdd/bin/carddisp.pl?gene=UBE3C</a>         |
| UPF1      | UPF1 RNA Helicase And ATPase                                                                      | Protein Coding | 39 | GC19P018831 | 0.177573 | <a href="https://www.ncbi.nlm.nih.gov/ncbi/cdd/bin/carddisp.pl?gene=UPF1">https://www.ncbi.nlm.nih.gov/ncbi/cdd/bin/carddisp.pl?gene=UPF1</a>           |
| ABCB9     | ATP Binding Cassette Subfamily B Member 9                                                         | Protein Coding | 38 | GC12M122920 | 0.177573 | <a href="https://www.ncbi.nlm.nih.gov/ncbi/cdd/bin/carddisp.pl?gene=ABCB9">https://www.ncbi.nlm.nih.gov/ncbi/cdd/bin/carddisp.pl?gene=ABCB9</a>         |
| ABCF2     | ATP Binding Cassette Subfamily F Member 2                                                         | Protein Coding | 38 | GC07M151211 | 0.177573 | <a href="https://www.ncbi.nlm.nih.gov/ncbi/cdd/bin/carddisp.pl?gene=ABCF2">https://www.ncbi.nlm.nih.gov/ncbi/cdd/bin/carddisp.pl?gene=ABCF2</a>         |
| AGR2      | Anterior Gradient 2, Protein Disulphide Isomerase Family Member                                   | Protein Coding | 38 | GC07M017058 | 0.177573 | <a href="https://www.ncbi.nlm.nih.gov/ncbi/cdd/bin/carddisp.pl?gene=AGR2">https://www.ncbi.nlm.nih.gov/ncbi/cdd/bin/carddisp.pl?gene=AGR2</a>           |
| ARAP3     | ArfGAP With RhoGAP Domain, Ankyrin Repeat And PH Domain 3                                         | Protein Coding | 38 | GC05M141653 | 0.177573 | <a href="https://www.ncbi.nlm.nih.gov/ncbi/cdd/bin/carddisp.pl?gene=ARAP3">https://www.ncbi.nlm.nih.gov/ncbi/cdd/bin/carddisp.pl?gene=ARAP3</a>         |
| ARHGAP24  | Rho GTPase Activating Protein 24                                                                  | Protein Coding | 38 | GC04P085475 | 0.177573 | <a href="https://www.ncbi.nlm.nih.gov/ncbi/cdd/bin/carddisp.pl?gene=ARHGAP24">https://www.ncbi.nlm.nih.gov/ncbi/cdd/bin/carddisp.pl?gene=ARHGAP24</a>   |
| CCDC22    | Coiled-Coil Domain Containing 22                                                                  | Protein Coding | 38 | GC0XP050747 | 0.177573 | <a href="https://www.ncbi.nlm.nih.gov/ncbi/cdd/bin/carddisp.pl?gene=CCDC22">https://www.ncbi.nlm.nih.gov/ncbi/cdd/bin/carddisp.pl?gene=CCDC22</a>       |

|         |                                                                       |                |    |             |          |                                                                                                                                            |
|---------|-----------------------------------------------------------------------|----------------|----|-------------|----------|--------------------------------------------------------------------------------------------------------------------------------------------|
|         |                                                                       |                |    |             |          | <a href="http://www.ncbi.nlm.nih.gov/ncbi/cdd/bin/carddisp.pl?gene=CCDC22">bin/carddisp.pl?gene=CCDC22</a>                                 |
| CDK18   | Cyclin Dependent Kinase 18                                            | Protein Coding | 38 | GC01P205504 | 0.177573 | <a href="http://www.ncbi.nlm.nih.gov/ncbi/cdd/bin/carddisp.pl?gene=CDK18">https://www.genecards.org/cgi-bin/carddisp.pl?gene=CDK18</a>     |
| COL19A1 | Collagen Type XIX Alpha 1 Chain                                       | Protein Coding | 38 | GC06P069866 | 0.177573 | <a href="http://www.ncbi.nlm.nih.gov/ncbi/cdd/bin/carddisp.pl?gene=COL19A1">https://www.genecards.org/cgi-bin/carddisp.pl?gene=COL19A1</a> |
| DDX21   | DEx D-Box Helicase 21                                                 | Protein Coding | 38 | GC10P068956 | 0.177573 | <a href="http://www.ncbi.nlm.nih.gov/ncbi/cdd/bin/carddisp.pl?gene=DDX21">https://www.genecards.org/cgi-bin/carddisp.pl?gene=DDX21</a>     |
| DNAL4   | Dynein Axonemal Light Chain 4                                         | Protein Coding | 38 | GC22M038778 | 0.177573 | <a href="http://www.ncbi.nlm.nih.gov/ncbi/cdd/bin/carddisp.pl?gene=DNAL4">https://www.genecards.org/cgi-bin/carddisp.pl?gene=DNAL4</a>     |
| DOK5    | Docking Protein 5                                                     | Protein Coding | 38 | GC20P054476 | 0.177573 | <a href="http://www.ncbi.nlm.nih.gov/ncbi/cdd/bin/carddisp.pl?gene=DOK5">https://www.genecards.org/cgi-bin/carddisp.pl?gene=DOK5</a>       |
| DUSP19  | Dual Specificity Phosphatase 19                                       | Protein Coding | 38 | GC02P183078 | 0.177573 | <a href="http://www.ncbi.nlm.nih.gov/ncbi/cdd/bin/carddisp.pl?gene=DUSP19">https://www.genecards.org/cgi-bin/carddisp.pl?gene=DUSP19</a>   |
| EEF1G   | Eukaryotic Translation Elongation Factor 1 Gamma                      | Protein Coding | 38 | GC11M089615 | 0.177573 | <a href="http://www.ncbi.nlm.nih.gov/ncbi/cdd/bin/carddisp.pl?gene=EEF1G">https://www.genecards.org/cgi-bin/carddisp.pl?gene=EEF1G</a>     |
| ELL2    | Elongation Factor For RNA Polymerase II 2                             | Protein Coding | 38 | GC05M095885 | 0.177573 | <a href="http://www.ncbi.nlm.nih.gov/ncbi/cdd/bin/carddisp.pl?gene=ELL2">https://www.genecards.org/cgi-bin/carddisp.pl?gene=ELL2</a>       |
| EPB41L2 | Erythrocyte Membrane Protein Band 4.1 Like 2                          | Protein Coding | 38 | GC06M130820 | 0.177573 | <a href="http://www.ncbi.nlm.nih.gov/ncbi/cdd/bin/carddisp.pl?gene=EPB41L2">https://www.genecards.org/cgi-bin/carddisp.pl?gene=EPB41L2</a> |
| LRRC4C  | Leucine Rich Repeat Containing 4C                                     | Protein Coding | 38 | GC11M040118 | 0.177573 | <a href="http://www.ncbi.nlm.nih.gov/ncbi/cdd/bin/carddisp.pl?gene=LRRC4C">https://www.genecards.org/cgi-bin/carddisp.pl?gene=LRRC4C</a>   |
| MARCKS  | Myristoylated Alanine Rich Protein Kinase C Substrate                 | Protein Coding | 38 | GC06P113857 | 0.177573 | <a href="http://www.ncbi.nlm.nih.gov/ncbi/cdd/bin/carddisp.pl?gene=MARCKS">https://www.genecards.org/cgi-bin/carddisp.pl?gene=MARCKS</a>   |
| MDN1    | Midasin AAA ATPase 1                                                  | Protein Coding | 38 | GC06M089642 | 0.177573 | <a href="http://www.ncbi.nlm.nih.gov/ncbi/cdd/bin/carddisp.pl?gene=MDN1">https://www.genecards.org/cgi-bin/carddisp.pl?gene=MDN1</a>       |
| MGAT3   | Beta-1,4-Mannosyl-Glycoprotein 4-Beta-N-Acetylglucosaminyltransferase | Protein Coding | 38 | GC22P039447 | 0.177573 | <a href="http://www.ncbi.nlm.nih.gov/ncbi/cdd/bin/carddisp.pl?gene=MGAT3">https://www.genecards.org/cgi-bin/carddisp.pl?gene=MGAT3</a>     |

|         |                                                         |                |    |             |          |                                                                                                                                     |
|---------|---------------------------------------------------------|----------------|----|-------------|----------|-------------------------------------------------------------------------------------------------------------------------------------|
| MTSS1   | MTSS I-BAR Domain Containing 1                          | Protein Coding | 38 | GC08M124550 | 0.177573 | <a href="https://www.genecards.org/cgi-bin/carddisp.pl?gene=MTSS1">https://www.genecards.org/cgi-bin/carddisp.pl?gene=MTSS1</a>     |
| PARVB   | Parvin Beta                                             | Protein Coding | 38 | GC22P043999 | 0.177573 | <a href="https://www.genecards.org/cgi-bin/carddisp.pl?gene=PARVB">https://www.genecards.org/cgi-bin/carddisp.pl?gene=PARVB</a>     |
| PGRMC2  | Progesterone Receptor Membrane Component 2              | Protein Coding | 38 | GC04M128269 | 0.177573 | <a href="https://www.genecards.org/cgi-bin/carddisp.pl?gene=PGRMC2">https://www.genecards.org/cgi-bin/carddisp.pl?gene=PGRMC2</a>   |
| PIGF    | Phosphatidylinositol Glycan Anchor Biosynthesis Class F | Protein Coding | 38 | GC02M046580 | 0.177573 | <a href="https://www.genecards.org/cgi-bin/carddisp.pl?gene=PIGF">https://www.genecards.org/cgi-bin/carddisp.pl?gene=PIGF</a>       |
| PIK3AP1 | Phosphoinositide-3-Kinase Adaptor Protein 1             | Protein Coding | 38 | GC10M096593 | 0.177573 | <a href="https://www.genecards.org/cgi-bin/carddisp.pl?gene=PIK3AP1">https://www.genecards.org/cgi-bin/carddisp.pl?gene=PIK3AP1</a> |
| PLCH1   | Phospholipase C Eta 1                                   | Protein Coding | 38 | GC03M155381 | 0.177573 | <a href="https://www.genecards.org/cgi-bin/carddisp.pl?gene=PLCH1">https://www.genecards.org/cgi-bin/carddisp.pl?gene=PLCH1</a>     |
| POU6F2  | POU Class 6 Homeobox 2                                  | Protein Coding | 38 | GC07P038977 | 0.177573 | <a href="https://www.genecards.org/cgi-bin/carddisp.pl?gene=POU6F2">https://www.genecards.org/cgi-bin/carddisp.pl?gene=POU6F2</a>   |
| PTPRR   | Protein Tyrosine Phosphatase Receptor Type R            | Protein Coding | 38 | GC12M070638 | 0.177573 | <a href="https://www.genecards.org/cgi-bin/carddisp.pl?gene=PTPRR">https://www.genecards.org/cgi-bin/carddisp.pl?gene=PTPRR</a>     |
| RNF213  | Ring Finger Protein 213                                 | Protein Coding | 38 | GC17P080260 | 0.177573 | <a href="https://www.genecards.org/cgi-bin/carddisp.pl?gene=RNF213">https://www.genecards.org/cgi-bin/carddisp.pl?gene=RNF213</a>   |
| RPL23   | Ribosomal Protein L23                                   | Protein Coding | 38 | GC17M038847 | 0.177573 | <a href="https://www.genecards.org/cgi-bin/carddisp.pl?gene=RPL23">https://www.genecards.org/cgi-bin/carddisp.pl?gene=RPL23</a>     |
| SF3B3   | Splicing Factor 3b Subunit 3                            | Protein Coding | 38 | GC16P070523 | 0.177573 | <a href="https://www.genecards.org/cgi-bin/carddisp.pl?gene=SF3B3">https://www.genecards.org/cgi-bin/carddisp.pl?gene=SF3B3</a>     |
| SFXN1   | Sideroflexin 1                                          | Protein Coding | 38 | GC05P175477 | 0.177573 | <a href="https://www.genecards.org/cgi-bin/carddisp.pl?gene=SFXN1">https://www.genecards.org/cgi-bin/carddisp.pl?gene=SFXN1</a>     |
| SSR1    | Signal Sequence Receptor Subunit 1                      | Protein Coding | 38 | GC06M007268 | 0.177573 | <a href="https://www.genecards.org/cgi-bin/carddisp.pl?gene=SSR1">https://www.genecards.org/cgi-bin/carddisp.pl?gene=SSR1</a>       |

|         |                                                 |                |    |             |          |                                                                                                                                     |
|---------|-------------------------------------------------|----------------|----|-------------|----------|-------------------------------------------------------------------------------------------------------------------------------------|
| TIMM44  | Translocase Of Inner Mitochondrial Membrane 44  | Protein Coding | 38 | GC19M007926 | 0.177573 | <a href="https://www.genecards.org/cgi-bin/carddisp.pl?gene=TIMM44">https://www.genecards.org/cgi-bin/carddisp.pl?gene=TIMM44</a>   |
| TNRC6A  | Trinucleotide Repeat Containing Adaptor 6A      | Protein Coding | 38 | GC16P024611 | 0.177573 | <a href="https://www.genecards.org/cgi-bin/carddisp.pl?gene=TNRC6A">https://www.genecards.org/cgi-bin/carddisp.pl?gene=TNRC6A</a>   |
| USP30   | Ubiquitin Specific Peptidase 30                 | Protein Coding | 38 | GC12P109027 | 0.177573 | <a href="https://www.genecards.org/cgi-bin/carddisp.pl?gene=USP30">https://www.genecards.org/cgi-bin/carddisp.pl?gene=USP30</a>     |
| ABI3    | ABI Family Member 3                             | Protein Coding | 37 | GC17P049210 | 0.177573 | <a href="https://www.genecards.org/cgi-bin/carddisp.pl?gene=ABI3">https://www.genecards.org/cgi-bin/carddisp.pl?gene=ABI3</a>       |
| ADAM2   | ADAM Metallopeptidase Domain 2                  | Protein Coding | 37 | GC08M039743 | 0.177573 | <a href="https://www.genecards.org/cgi-bin/carddisp.pl?gene=ADAM2">https://www.genecards.org/cgi-bin/carddisp.pl?gene=ADAM2</a>     |
| ANO2    | Anoctamin 2                                     | Protein Coding | 37 | GC12M005532 | 0.177573 | <a href="https://www.genecards.org/cgi-bin/carddisp.pl?gene=ANO2">https://www.genecards.org/cgi-bin/carddisp.pl?gene=ANO2</a>       |
| ATP11C  | ATPase Phospholipid Transporting 11C            | Protein Coding | 37 | GC0XM139726 | 0.177573 | <a href="https://www.genecards.org/cgi-bin/carddisp.pl?gene=ATP11C">https://www.genecards.org/cgi-bin/carddisp.pl?gene=ATP11C</a>   |
| BAG4    | BAG Cochaperone 4                               | Protein Coding | 37 | GC08P038176 | 0.177573 | <a href="https://www.genecards.org/cgi-bin/carddisp.pl?gene=BAG4">https://www.genecards.org/cgi-bin/carddisp.pl?gene=BAG4</a>       |
| CAND1   | Cullin Associated And Neddylation Dissociated 1 | Protein Coding | 37 | GC12P067270 | 0.177573 | <a href="https://www.genecards.org/cgi-bin/carddisp.pl?gene=CAND1">https://www.genecards.org/cgi-bin/carddisp.pl?gene=CAND1</a>     |
| CD248   | CD248 Molecule                                  | Protein Coding | 37 | GC11M066314 | 0.177573 | <a href="https://www.genecards.org/cgi-bin/carddisp.pl?gene=CD248">https://www.genecards.org/cgi-bin/carddisp.pl?gene=CD248</a>     |
| CD300LB | CD300 Molecule Like Family Member B             | Protein Coding | 37 | GC17M074520 | 0.177573 | <a href="https://www.genecards.org/cgi-bin/carddisp.pl?gene=CD300LB">https://www.genecards.org/cgi-bin/carddisp.pl?gene=CD300LB</a> |
| COPG1   | COPI Coat Complex Subunit Gamma 1               | Protein Coding | 37 | GC03P129249 | 0.177573 | <a href="https://www.genecards.org/cgi-bin/carddisp.pl?gene=COPG1">https://www.genecards.org/cgi-bin/carddisp.pl?gene=COPG1</a>     |
| CRISP3  | Cysteine Rich Secretory Protein 3               | Protein Coding | 37 | GC06M049727 | 0.177573 | <a href="https://www.genecards.org/cgi-bin/carddisp.pl?gene=CRISP3">https://www.genecards.org/cgi-bin/carddisp.pl?gene=CRISP3</a>   |
| CST7    | Cystatin F                                      | Protein Coding | 37 | GC20P024949 | 0.177573 | <a href="https://www.genecards.org/cgi-">https://www.genecards.org/cgi-</a>                                                         |

|           |                                                  |                |    |             |          |                                                                                                                                       |
|-----------|--------------------------------------------------|----------------|----|-------------|----------|---------------------------------------------------------------------------------------------------------------------------------------|
|           |                                                  |                |    |             |          | bin/carddisp.pl?gene=CST7                                                                                                             |
| CTSW      | Cathepsin W                                      | Protein Coding | 37 | GC11P065879 | 0.177573 | <a href="https://www.genecards.org/cgi-bin/carddisp.pl?gene=CTSW">https://www.genecards.org/cgi-bin/carddisp.pl?gene=CTSW</a>         |
| DAND5     | DAN Domain BMP Antagonist Family Member 5        | Protein Coding | 37 | GC19P012965 | 0.177573 | <a href="https://www.genecards.org/cgi-bin/carddisp.pl?gene=DAND5">https://www.genecards.org/cgi-bin/carddisp.pl?gene=DAND5</a>       |
| DEPTOR    | DEP Domain Containing MTOR Interacting Protein   | Protein Coding | 37 | GC08P119873 | 0.177573 | <a href="https://www.genecards.org/cgi-bin/carddisp.pl?gene=DEPTOR">https://www.genecards.org/cgi-bin/carddisp.pl?gene=DEPTOR</a>     |
| EXOSC1    | Exosome Component 1                              | Protein Coding | 37 | GC10M097435 | 0.177573 | <a href="https://www.genecards.org/cgi-bin/carddisp.pl?gene=EXOSC1">https://www.genecards.org/cgi-bin/carddisp.pl?gene=EXOSC1</a>     |
| FMNL2     | Formin Like 2                                    | Protein Coding | 37 | GC02P152335 | 0.177573 | <a href="https://www.genecards.org/cgi-bin/carddisp.pl?gene=FMNL2">https://www.genecards.org/cgi-bin/carddisp.pl?gene=FMNL2</a>       |
| GPR158    | G Protein-Coupled Receptor 158                   | Protein Coding | 37 | GC10P025174 | 0.177573 | <a href="https://www.genecards.org/cgi-bin/carddisp.pl?gene=GPR158">https://www.genecards.org/cgi-bin/carddisp.pl?gene=GPR158</a>     |
| GRK3      | G Protein-Coupled Receptor Kinase 3              | Protein Coding | 37 | GC22P036163 | 0.177573 | <a href="https://www.genecards.org/cgi-bin/carddisp.pl?gene=GRK3">https://www.genecards.org/cgi-bin/carddisp.pl?gene=GRK3</a>         |
| HNRNPU L1 | Heterogeneous Nuclear Ribonucleoprotein U Like 1 | Protein Coding | 37 | GC19P041262 | 0.177573 | <a href="https://www.genecards.org/cgi-bin/carddisp.pl?gene=HNRNPUL1">https://www.genecards.org/cgi-bin/carddisp.pl?gene=HNRNPUL1</a> |
| IFI35     | Interferon Induced Protein 35                    | Protein Coding | 37 | GC17P043006 | 0.177573 | <a href="https://www.genecards.org/cgi-bin/carddisp.pl?gene=IFI35">https://www.genecards.org/cgi-bin/carddisp.pl?gene=IFI35</a>       |
| IFT74     | Intraflagellar Transport 74                      | Protein Coding | 37 | GC09P026947 | 0.177573 | <a href="https://www.genecards.org/cgi-bin/carddisp.pl?gene=IFT74">https://www.genecards.org/cgi-bin/carddisp.pl?gene=IFT74</a>       |
| INTS6     | Integrator Complex Subunit 6                     | Protein Coding | 37 | GC13M051334 | 0.177573 | <a href="https://www.genecards.org/cgi-bin/carddisp.pl?gene=INTS6">https://www.genecards.org/cgi-bin/carddisp.pl?gene=INTS6</a>       |
| IPMK      | Inositol Polyphosphate Multikinase               | Protein Coding | 37 | GC10M058191 | 0.177573 | <a href="https://www.genecards.org/cgi-bin/carddisp.pl?gene=IPMK">https://www.genecards.org/cgi-bin/carddisp.pl?gene=IPMK</a>         |
| ITGA10    | Integrin Subunit Alpha 10                        | Protein Coding | 37 | GC01M145891 | 0.177573 | <a href="https://www.genecards.org/cgi-bin/carddisp.pl?gene=ITGA10">https://www.genecards.org/cgi-bin/carddisp.pl?gene=ITGA10</a>     |



|           |                                                             |                |    |             |          |                                                                                                                                       |
|-----------|-------------------------------------------------------------|----------------|----|-------------|----------|---------------------------------------------------------------------------------------------------------------------------------------|
| LARS1     | Leucyl-TRNA Synthetase 1                                    | Protein Coding | 37 | GC05M146114 | 0.177573 | <a href="https://www.genecards.org/cgi-bin/carddisp.pl?gene=LARS1">https://www.genecards.org/cgi-bin/carddisp.pl?gene=LARS1</a>       |
| LRRTM4    | Leucine Rich Repeat Transmembrane Neuronal 4                | Protein Coding | 37 | GC02M076747 | 0.177573 | <a href="https://www.genecards.org/cgi-bin/carddisp.pl?gene=LRRTM4">https://www.genecards.org/cgi-bin/carddisp.pl?gene=LRRTM4</a>     |
| MPRIIP    | Myosin Phosphatase Rho Interacting Protein                  | Protein Coding | 37 | GC17P017042 | 0.177573 | <a href="https://www.genecards.org/cgi-bin/carddisp.pl?gene=MPRIIP">https://www.genecards.org/cgi-bin/carddisp.pl?gene=MPRIIP</a>     |
| OXER1     | Oxoeicosanoid Receptor 1                                    | Protein Coding | 37 | GC02M042762 | 0.177573 | <a href="https://www.genecards.org/cgi-bin/carddisp.pl?gene=OXER1">https://www.genecards.org/cgi-bin/carddisp.pl?gene=OXER1</a>       |
| PPP1R12B  | Protein Phosphatase 1 Regulatory Subunit 12B                | Protein Coding | 37 | GC01P202348 | 0.177573 | <a href="https://www.genecards.org/cgi-bin/carddisp.pl?gene=PPP1R12B">https://www.genecards.org/cgi-bin/carddisp.pl?gene=PPP1R12B</a> |
| RALGAP A2 | Ral GTPase Activating Protein Catalytic Subunit Alpha 2     | Protein Coding | 37 | GC20M020374 | 0.177573 | <a href="https://www.genecards.org/cgi-bin/carddisp.pl?gene=RALGAPA2">https://www.genecards.org/cgi-bin/carddisp.pl?gene=RALGAPA2</a> |
| RBM14     | RNA Binding Motif Protein 14                                | Protein Coding | 37 | GC11P070099 | 0.177573 | <a href="https://www.genecards.org/cgi-bin/carddisp.pl?gene=RBM14">https://www.genecards.org/cgi-bin/carddisp.pl?gene=RBM14</a>       |
| RNPS1     | RNA Binding Protein With Serine Rich Domain 1               | Protein Coding | 37 | GC16M002253 | 0.177573 | <a href="https://www.genecards.org/cgi-bin/carddisp.pl?gene=RNPS1">https://www.genecards.org/cgi-bin/carddisp.pl?gene=RNPS1</a>       |
| SCUBE1    | Signal Peptide, CUB Domain And EGF Like Domain Containing 1 | Protein Coding | 37 | GC22M043197 | 0.177573 | <a href="https://www.genecards.org/cgi-bin/carddisp.pl?gene=SCUBE1">https://www.genecards.org/cgi-bin/carddisp.pl?gene=SCUBE1</a>     |
| SMYD1     | SET And MYND Domain Containing 1                            | Protein Coding | 37 | GC02P088075 | 0.177573 | <a href="https://www.genecards.org/cgi-bin/carddisp.pl?gene=SMYD1">https://www.genecards.org/cgi-bin/carddisp.pl?gene=SMYD1</a>       |
| SRPRB     | SRP Receptor Subunit Beta                                   | Protein Coding | 37 | GC03P133784 | 0.177573 | <a href="https://www.genecards.org/cgi-bin/carddisp.pl?gene=SRPRB">https://www.genecards.org/cgi-bin/carddisp.pl?gene=SRPRB</a>       |
| STAC      | SH3 And Cysteine Rich Domain                                | Protein Coding | 37 | GC03P036421 | 0.177573 | <a href="https://www.genecards.org/cgi-bin/carddisp.pl?gene=STAC">https://www.genecards.org/cgi-bin/carddisp.pl?gene=STAC</a>         |
| TCHH      | Trichohyalin                                                | Protein Coding | 37 | GC01M152106 | 0.177573 | <a href="https://www.genecards.org/cgi-bin/carddisp.pl?gene=TCHH">https://www.genecards.org/cgi-bin/carddisp.pl?gene=TCHH</a>         |

|         |                                                         |                |    |             |          |                                                                                                                                     |
|---------|---------------------------------------------------------|----------------|----|-------------|----------|-------------------------------------------------------------------------------------------------------------------------------------|
| ASCL2   | Achaete-Scute Family BHLH Transcription Factor 2        | Protein Coding | 36 | GC11M003304 | 0.177573 | <a href="https://www.genecards.org/cgi-bin/carddisp.pl?gene=ASCL2">https://www.genecards.org/cgi-bin/carddisp.pl?gene=ASCL2</a>     |
| ATAD3B  | ATPase Family AAA Domain Containing 3B                  | Protein Coding | 36 | GC01P003884 | 0.177573 | <a href="https://www.genecards.org/cgi-bin/carddisp.pl?gene=ATAD3B">https://www.genecards.org/cgi-bin/carddisp.pl?gene=ATAD3B</a>   |
| CCDC40  | Coiled-Coil Domain Containing 40                        | Protein Coding | 36 | GC17P080037 | 0.177573 | <a href="https://www.genecards.org/cgi-bin/carddisp.pl?gene=CCDC40">https://www.genecards.org/cgi-bin/carddisp.pl?gene=CCDC40</a>   |
| EAPP    | E2F Associated Phosphoprotein                           | Protein Coding | 36 | GC14M034516 | 0.177573 | <a href="https://www.genecards.org/cgi-bin/carddisp.pl?gene=EAPP">https://www.genecards.org/cgi-bin/carddisp.pl?gene=EAPP</a>       |
| EYS     | Eyes Shut Homolog                                       | Protein Coding | 36 | GC06M063719 | 0.177573 | <a href="https://www.genecards.org/cgi-bin/carddisp.pl?gene=EYS">https://www.genecards.org/cgi-bin/carddisp.pl?gene=EYS</a>         |
| IPO4    | Importin 4                                              | Protein Coding | 36 | GC14M024181 | 0.177573 | <a href="https://www.genecards.org/cgi-bin/carddisp.pl?gene=IPO4">https://www.genecards.org/cgi-bin/carddisp.pl?gene=IPO4</a>       |
| JAKMIP1 | Janus Kinase And Microtubule Interacting Protein 1      | Protein Coding | 36 | GC04M006026 | 0.177573 | <a href="https://www.genecards.org/cgi-bin/carddisp.pl?gene=JAKMIP1">https://www.genecards.org/cgi-bin/carddisp.pl?gene=JAKMIP1</a> |
| LAYN    | Layilin                                                 | Protein Coding | 36 | GC11P111717 | 0.177573 | <a href="https://www.genecards.org/cgi-bin/carddisp.pl?gene=LAYN">https://www.genecards.org/cgi-bin/carddisp.pl?gene=LAYN</a>       |
| LINGO2  | Leucine Rich Repeat And Ig Domain Containing 2          | Protein Coding | 36 | GC09M028340 | 0.177573 | <a href="https://www.genecards.org/cgi-bin/carddisp.pl?gene=LINGO2">https://www.genecards.org/cgi-bin/carddisp.pl?gene=LINGO2</a>   |
| MMS19   | MMS19 Homolog, Cytosolic Iron-Sulfur Assembly Component | Protein Coding | 36 | GC10M097458 | 0.177573 | <a href="https://www.genecards.org/cgi-bin/carddisp.pl?gene=MMS19">https://www.genecards.org/cgi-bin/carddisp.pl?gene=MMS19</a>     |
| MRGPRX1 | MAS Related GPR Family Member X1                        | Protein Coding | 36 | GC11M018955 | 0.177573 | <a href="https://www.genecards.org/cgi-bin/carddisp.pl?gene=MRGPRX1">https://www.genecards.org/cgi-bin/carddisp.pl?gene=MRGPRX1</a> |
| NAV1    | Neuron Navigator 1                                      | Protein Coding | 36 | GC01P201563 | 0.177573 | <a href="https://www.genecards.org/cgi-bin/carddisp.pl?gene=NAV1">https://www.genecards.org/cgi-bin/carddisp.pl?gene=NAV1</a>       |
| RAB3C   | RAB3C, Member RAS Oncogene Family                       | Protein Coding | 36 | GC05P058582 | 0.177573 | <a href="https://www.genecards.org/cgi-bin/carddisp.pl?gene=RAB3C">https://www.genecards.org/cgi-bin/carddisp.pl?gene=RAB3C</a>     |
| SNX6    | Sorting Nexin 6                                         | Protein Coding | 36 | GC14M034561 | 0.177573 | <a href="https://www.genecards.org/cgi-bin/carddisp.pl?gene=SNX6">https://www.genecards.org/cgi-bin/carddisp.pl?gene=SNX6</a>       |

|          |                                                |                |    |             |          |                                                                                                                                       |
|----------|------------------------------------------------|----------------|----|-------------|----------|---------------------------------------------------------------------------------------------------------------------------------------|
|          |                                                |                |    |             |          | <a href="http://bin/carddisp.pl?gene=SNX6">bin/carddisp.pl?gene=SNX6</a>                                                              |
| SRRM2    | Serine/Arginine Repetitive Matrix 2            | Protein Coding | 36 | GC16P011722 | 0.177573 | <a href="https://www.genecards.org/cgi-bin/carddisp.pl?gene=SRRM2">https://www.genecards.org/cgi-bin/carddisp.pl?gene=SRRM2</a>       |
| TMEM132D | Transmembrane Protein 132D                     | Protein Coding | 36 | GC12M129071 | 0.177573 | <a href="https://www.genecards.org/cgi-bin/carddisp.pl?gene=TMEM132D">https://www.genecards.org/cgi-bin/carddisp.pl?gene=TMEM132D</a> |
| TPTE     | Transmembrane Phosphatase With Tensin Homology | Protein Coding | 36 | GC21P010521 | 0.177573 | <a href="https://www.genecards.org/cgi-bin/carddisp.pl?gene=TPTE">https://www.genecards.org/cgi-bin/carddisp.pl?gene=TPTE</a>         |
| TSPAN4   | Tetraspanin 4                                  | Protein Coding | 36 | GC11P001793 | 0.177573 | <a href="https://www.genecards.org/cgi-bin/carddisp.pl?gene=TSPAN4">https://www.genecards.org/cgi-bin/carddisp.pl?gene=TSPAN4</a>     |
| TTC26    | Tetratricopeptide Repeat Domain 26             | Protein Coding | 36 | GC07P139135 | 0.177573 | <a href="https://www.genecards.org/cgi-bin/carddisp.pl?gene=TTC26">https://www.genecards.org/cgi-bin/carddisp.pl?gene=TTC26</a>       |
| TXNRD3   | Thioredoxin Reductase 3                        | Protein Coding | 36 | GC03M126577 | 0.177573 | <a href="https://www.genecards.org/cgi-bin/carddisp.pl?gene=TXNRD3">https://www.genecards.org/cgi-bin/carddisp.pl?gene=TXNRD3</a>     |
| COQ8A    | Coenzyme Q8A                                   | Protein Coding | 35 | GC01P226939 | 0.177573 | <a href="https://www.genecards.org/cgi-bin/carddisp.pl?gene=COQ8A">https://www.genecards.org/cgi-bin/carddisp.pl?gene=COQ8A</a>       |
| CPNE8    | Copine 8                                       | Protein Coding | 35 | GC12M038646 | 0.177573 | <a href="https://www.genecards.org/cgi-bin/carddisp.pl?gene=CPNE8">https://www.genecards.org/cgi-bin/carddisp.pl?gene=CPNE8</a>       |
| IARS1    | Isoleucyl-TRNA Synthetase 1                    | Protein Coding | 35 | GC09M094184 | 0.177573 | <a href="https://www.genecards.org/cgi-bin/carddisp.pl?gene=IARS1">https://www.genecards.org/cgi-bin/carddisp.pl?gene=IARS1</a>       |
| MEF2B    | Myocyte Enhancer Factor 2B                     | Protein Coding | 35 | GC19M019150 | 0.177573 | <a href="https://www.genecards.org/cgi-bin/carddisp.pl?gene=MEF2B">https://www.genecards.org/cgi-bin/carddisp.pl?gene=MEF2B</a>       |
| NCOA5    | Nuclear Receptor Coactivator 5                 | Protein Coding | 35 | GC20M046060 | 0.177573 | <a href="https://www.genecards.org/cgi-bin/carddisp.pl?gene=NCOA5">https://www.genecards.org/cgi-bin/carddisp.pl?gene=NCOA5</a>       |
| RACK1    | Receptor For Activated C Kinase 1              | Protein Coding | 35 | GC05M181795 | 0.177573 | <a href="https://www.genecards.org/cgi-bin/carddisp.pl?gene=RACK1">https://www.genecards.org/cgi-bin/carddisp.pl?gene=RACK1</a>       |
| TRIM6    | Tripartite Motif Containing 6                  | Protein Coding | 35 | GC11P005596 | 0.177573 | <a href="https://www.genecards.org/cgi-bin/carddisp.pl?gene=TRIM6">https://www.genecards.org/cgi-bin/carddisp.pl?gene=TRIM6</a>       |

|         |                                                                          |                |    |             |          |                                                                                                                                     |
|---------|--------------------------------------------------------------------------|----------------|----|-------------|----------|-------------------------------------------------------------------------------------------------------------------------------------|
| WDR6    | WD Repeat Domain 6                                                       | Protein Coding | 35 | GC03P049007 | 0.177573 | <a href="https://www.genecards.org/cgi-bin/carddisp.pl?gene=WDR6">https://www.genecards.org/cgi-bin/carddisp.pl?gene=WDR6</a>       |
| CD300C  | CD300c Molecule                                                          | Protein Coding | 34 | GC17M074544 | 0.177573 | <a href="https://www.genecards.org/cgi-bin/carddisp.pl?gene=CD300C">https://www.genecards.org/cgi-bin/carddisp.pl?gene=CD300C</a>   |
| CD300E  | CD300e Molecule                                                          | Protein Coding | 34 | GC17M074609 | 0.177573 | <a href="https://www.genecards.org/cgi-bin/carddisp.pl?gene=CD300E">https://www.genecards.org/cgi-bin/carddisp.pl?gene=CD300E</a>   |
| CNTNAP5 | Contactin Associated Protein Family Member 5                             | Protein Coding | 34 | GC02P124025 | 0.177573 | <a href="https://www.genecards.org/cgi-bin/carddisp.pl?gene=CNTNAP5">https://www.genecards.org/cgi-bin/carddisp.pl?gene=CNTNAP5</a> |
| FAIM2   | Fas Apoptotic Inhibitory Molecule 2                                      | Protein Coding | 34 | GC12M049866 | 0.177573 | <a href="https://www.genecards.org/cgi-bin/carddisp.pl?gene=FAIM2">https://www.genecards.org/cgi-bin/carddisp.pl?gene=FAIM2</a>     |
| FOXQ1   | Forkhead Box Q1                                                          | Protein Coding | 34 | GC06P001312 | 0.177573 | <a href="https://www.genecards.org/cgi-bin/carddisp.pl?gene=FOXQ1">https://www.genecards.org/cgi-bin/carddisp.pl?gene=FOXQ1</a>     |
| FRY     | FRY Microtubule Binding Protein                                          | Protein Coding | 34 | GC13P031883 | 0.177573 | <a href="https://www.genecards.org/cgi-bin/carddisp.pl?gene=FRY">https://www.genecards.org/cgi-bin/carddisp.pl?gene=FRY</a>         |
| NTPCR   | Nucleoside-Triphosphatase, Cancer-Related                                | Protein Coding | 34 | GC01P232950 | 0.177573 | <a href="https://www.genecards.org/cgi-bin/carddisp.pl?gene=NTPCR">https://www.genecards.org/cgi-bin/carddisp.pl?gene=NTPCR</a>     |
| OTOR    | Otoraplin                                                                | Protein Coding | 34 | GC20P016748 | 0.177573 | <a href="https://www.genecards.org/cgi-bin/carddisp.pl?gene=OTOR">https://www.genecards.org/cgi-bin/carddisp.pl?gene=OTOR</a>       |
| PDCD11  | Programmed Cell Death 11                                                 | Protein Coding | 34 | GC10P103396 | 0.177573 | <a href="https://www.genecards.org/cgi-bin/carddisp.pl?gene=PDCD11">https://www.genecards.org/cgi-bin/carddisp.pl?gene=PDCD11</a>   |
| PGAM5   | PGAM Family Member 5, Mitochondrial Serine/Threonine Protein Phosphatase | Protein Coding | 34 | GC12P132710 | 0.177573 | <a href="https://www.genecards.org/cgi-bin/carddisp.pl?gene=PGAM5">https://www.genecards.org/cgi-bin/carddisp.pl?gene=PGAM5</a>     |
| SGCZ    | Sarcoglycan Zeta                                                         | Protein Coding | 34 | GC08M014089 | 0.177573 | <a href="https://www.genecards.org/cgi-bin/carddisp.pl?gene=SGCZ">https://www.genecards.org/cgi-bin/carddisp.pl?gene=SGCZ</a>       |
| SHISA6  | Shisa Family Member 6                                                    | Protein Coding | 34 | GC17P011241 | 0.177573 | <a href="https://www.genecards.org/cgi-bin/carddisp.pl?gene=SHISA6">https://www.genecards.org/cgi-bin/carddisp.pl?gene=SHISA6</a>   |
| SYT9    | Synaptotagmin 9                                                          | Protein Coding | 34 | GC11P007238 | 0.177573 | <a href="https://www.genecards.org/cgi-">https://www.genecards.org/cgi-</a>                                                         |

|          |                                                             |                |    |             |          |                                                                                                                                       |
|----------|-------------------------------------------------------------|----------------|----|-------------|----------|---------------------------------------------------------------------------------------------------------------------------------------|
|          |                                                             |                |    |             |          | <a href="http://bin/carddisp.pl?gene=SYT9">bin/carddisp.pl?gene=SYT9</a>                                                              |
| TBC1D14  | TBC1 Domain Family Member 14                                | Protein Coding | 34 | GC04P006910 | 0.177573 | <a href="https://www.genecards.org/cgi-bin/carddisp.pl?gene=TBC1D14">https://www.genecards.org/cgi-bin/carddisp.pl?gene=TBC1D14</a>   |
| ANKFN1   | Ankyrin Repeat And Fibronectin Type III Domain Containing 1 | Protein Coding | 33 | GC17P055882 | 0.177573 | <a href="https://www.genecards.org/cgi-bin/carddisp.pl?gene=ANKFN1">https://www.genecards.org/cgi-bin/carddisp.pl?gene=ANKFN1</a>     |
| ARMC3    | Armadillo Repeat Containing 3                               | Protein Coding | 33 | GC10P022928 | 0.177573 | <a href="https://www.genecards.org/cgi-bin/carddisp.pl?gene=ARMC3">https://www.genecards.org/cgi-bin/carddisp.pl?gene=ARMC3</a>       |
| ATP5F1B  | ATP Synthase F1 Subunit Beta                                | Protein Coding | 33 | GC12M056646 | 0.177573 | <a href="https://www.genecards.org/cgi-bin/carddisp.pl?gene=ATP5F1B">https://www.genecards.org/cgi-bin/carddisp.pl?gene=ATP5F1B</a>   |
| ATP5PO   | ATP Synthase Peripheral Stalk Subunit OSCP                  | Protein Coding | 33 | GC21M033904 | 0.177573 | <a href="https://www.genecards.org/cgi-bin/carddisp.pl?gene=ATP5PO">https://www.genecards.org/cgi-bin/carddisp.pl?gene=ATP5PO</a>     |
| BEND7    | BEN Domain Containing 7                                     | Protein Coding | 33 | GC10M013392 | 0.177573 | <a href="https://www.genecards.org/cgi-bin/carddisp.pl?gene=BEND7">https://www.genecards.org/cgi-bin/carddisp.pl?gene=BEND7</a>       |
| C15orf48 | Chromosome 15 Open Reading Frame 48                         | Protein Coding | 33 | GC15P045430 | 0.177573 | <a href="https://www.genecards.org/cgi-bin/carddisp.pl?gene=C15orf48">https://www.genecards.org/cgi-bin/carddisp.pl?gene=C15orf48</a> |
| CEP131   | Centrosomal Protein 131                                     | Protein Coding | 33 | GC17M081189 | 0.177573 | <a href="https://www.genecards.org/cgi-bin/carddisp.pl?gene=CEP131">https://www.genecards.org/cgi-bin/carddisp.pl?gene=CEP131</a>     |
| KMT5B    | Lysine Methyltransferase 5B                                 | Protein Coding | 33 | GC11M090188 | 0.177573 | <a href="https://www.genecards.org/cgi-bin/carddisp.pl?gene=KMT5B">https://www.genecards.org/cgi-bin/carddisp.pl?gene=KMT5B</a>       |
| NELFE    | Negative Elongation Factor Complex Member E                 | Protein Coding | 33 | GC06M031952 | 0.177573 | <a href="https://www.genecards.org/cgi-bin/carddisp.pl?gene=NELFE">https://www.genecards.org/cgi-bin/carddisp.pl?gene=NELFE</a>       |
| NPBWR1   | Neuropeptides B And W Receptor 1                            | Protein Coding | 33 | GC08P052938 | 0.177573 | <a href="https://www.genecards.org/cgi-bin/carddisp.pl?gene=NPBWR1">https://www.genecards.org/cgi-bin/carddisp.pl?gene=NPBWR1</a>     |
| PTPA     | Protein Phosphatase 2 Phosphatase Activator                 | Protein Coding | 33 | GC09P129111 | 0.177573 | <a href="https://www.genecards.org/cgi-bin/carddisp.pl?gene=PTPA">https://www.genecards.org/cgi-bin/carddisp.pl?gene=PTPA</a>         |
| SLC38A10 | Solute Carrier Family 38 Member 10                          | Protein Coding | 33 | GC17M081244 | 0.177573 | <a href="https://www.genecards.org/cgi-bin/carddisp.pl?gene=SLC38A10">https://www.genecards.org/cgi-bin/carddisp.pl?gene=SLC38A10</a> |

|         |                                                          |                |    |             |          |                                                                                                                                     |
|---------|----------------------------------------------------------|----------------|----|-------------|----------|-------------------------------------------------------------------------------------------------------------------------------------|
| SNX31   | Sorting Nexin 31                                         | Protein Coding | 33 | GC08M100572 | 0.177573 | <a href="https://www.genecards.org/cgi-bin/carddisp.pl?gene=SNX31">https://www.genecards.org/cgi-bin/carddisp.pl?gene=SNX31</a>     |
| SYT8    | Synaptotagmin 8                                          | Protein Coding | 33 | GC11P001858 | 0.177573 | <a href="https://www.genecards.org/cgi-bin/carddisp.pl?gene=SYT8">https://www.genecards.org/cgi-bin/carddisp.pl?gene=SYT8</a>       |
| CCT8L2  | Chaperonin Containing TCP1 Subunit 8 Like 2              | Protein Coding | 32 | GC22M016593 | 0.177573 | <a href="https://www.genecards.org/cgi-bin/carddisp.pl?gene=CCT8L2">https://www.genecards.org/cgi-bin/carddisp.pl?gene=CCT8L2</a>   |
| DNASE2B | Deoxyribonuclease 2 Beta                                 | Protein Coding | 32 | GC01P084398 | 0.177573 | <a href="https://www.genecards.org/cgi-bin/carddisp.pl?gene=DNASE2B">https://www.genecards.org/cgi-bin/carddisp.pl?gene=DNASE2B</a> |
| EFCAB6  | EF-Hand Calcium Binding Domain 6                         | Protein Coding | 32 | GC22M057620 | 0.177573 | <a href="https://www.genecards.org/cgi-bin/carddisp.pl?gene=EFCAB6">https://www.genecards.org/cgi-bin/carddisp.pl?gene=EFCAB6</a>   |
| MON2    | MON2 Homolog, Regulator Of Endosome-To-Golgi Trafficking | Protein Coding | 32 | GC12P062466 | 0.177573 | <a href="https://www.genecards.org/cgi-bin/carddisp.pl?gene=MON2">https://www.genecards.org/cgi-bin/carddisp.pl?gene=MON2</a>       |
| TMEM182 | Transmembrane Protein 182                                | Protein Coding | 32 | GC02P102744 | 0.177573 | <a href="https://www.genecards.org/cgi-bin/carddisp.pl?gene=TMEM182">https://www.genecards.org/cgi-bin/carddisp.pl?gene=TMEM182</a> |
| TSPAN17 | Tetraspanin 17                                           | Protein Coding | 32 | GC05P176647 | 0.177573 | <a href="https://www.genecards.org/cgi-bin/carddisp.pl?gene=TSPAN17">https://www.genecards.org/cgi-bin/carddisp.pl?gene=TSPAN17</a> |
| ZNF385D | Zinc Finger Protein 385D                                 | Protein Coding | 32 | GC03M021412 | 0.177573 | <a href="https://www.genecards.org/cgi-bin/carddisp.pl?gene=ZNF385D">https://www.genecards.org/cgi-bin/carddisp.pl?gene=ZNF385D</a> |
| ZNF804B | Zinc Finger Protein 804B                                 | Protein Coding | 32 | GC07P088759 | 0.177573 | <a href="https://www.genecards.org/cgi-bin/carddisp.pl?gene=ZNF804B">https://www.genecards.org/cgi-bin/carddisp.pl?gene=ZNF804B</a> |
| CD300LD | CD300 Molecule Like Family Member D                      | Protein Coding | 31 | GC17M074579 | 0.177573 | <a href="https://www.genecards.org/cgi-bin/carddisp.pl?gene=CD300LD">https://www.genecards.org/cgi-bin/carddisp.pl?gene=CD300LD</a> |
| CSRNP1  | Cysteine And Serine Rich Nuclear Protein 1               | Protein Coding | 31 | GC03M039159 | 0.177573 | <a href="https://www.genecards.org/cgi-bin/carddisp.pl?gene=CSRNP1">https://www.genecards.org/cgi-bin/carddisp.pl?gene=CSRNP1</a>   |
| PROX2   | Prospero Homeobox 2                                      | Protein Coding | 31 | GC14M074852 | 0.177573 | <a href="https://www.genecards.org/cgi-bin/carddisp.pl?gene=PROX2">https://www.genecards.org/cgi-bin/carddisp.pl?gene=PROX2</a>     |
| PYCR3   | Pyrroline-5-Carboxylate Reductase 3                      | Protein Coding | 31 | GC08M143604 | 0.177573 | <a href="https://www.genecards.org/cgi-">https://www.genecards.org/cgi-</a>                                                         |

|              |                                              |                |    |             |          |                                                                                                                                               |
|--------------|----------------------------------------------|----------------|----|-------------|----------|-----------------------------------------------------------------------------------------------------------------------------------------------|
|              |                                              |                |    |             |          | <a href="#">bin/carddisp.pl?gene=PYCR3</a>                                                                                                    |
| ATP5F1C      | ATP Synthase F1 Subunit Gamma                | Protein Coding | 30 | GC10P007789 | 0.177573 | <a href="https://www.genecards.org/cgi-bin/carddisp.pl?gene=ATP5F1C">https://www.genecards.org/cgi-bin/carddisp.pl?gene=ATP5F1C</a>           |
| C4orf17      | Chromosome 4 Open Reading Frame 17           | Protein Coding | 30 | GC04P099511 | 0.177573 | <a href="https://www.genecards.org/cgi-bin/carddisp.pl?gene=C4orf17">https://www.genecards.org/cgi-bin/carddisp.pl?gene=C4orf17</a>           |
| RELL1        | RELT Like 1                                  | Protein Coding | 30 | GC04M037592 | 0.177573 | <a href="https://www.genecards.org/cgi-bin/carddisp.pl?gene=RELL1">https://www.genecards.org/cgi-bin/carddisp.pl?gene=RELL1</a>               |
| TTLL2        | Tubulin Tyrosine Ligase Like 2               | Protein Coding | 30 | GC06P167325 | 0.177573 | <a href="https://www.genecards.org/cgi-bin/carddisp.pl?gene=TTLL2">https://www.genecards.org/cgi-bin/carddisp.pl?gene=TTLL2</a>               |
| GCN1         | GCN1 Activator Of EIF2AK4                    | Protein Coding | 29 | GC12M120128 | 0.177573 | <a href="https://www.genecards.org/cgi-bin/carddisp.pl?gene=GCN1">https://www.genecards.org/cgi-bin/carddisp.pl?gene=GCN1</a>                 |
| SEPTIN6      | Septin 6                                     | Protein Coding | 29 | GC0XM119616 | 0.177573 | <a href="https://www.genecards.org/cgi-bin/carddisp.pl?gene=SEPTIN6">https://www.genecards.org/cgi-bin/carddisp.pl?gene=SEPTIN6</a>           |
| TMEM255B     | Transmembrane Protein 255B                   | Protein Coding | 29 | GC13P113759 | 0.177573 | <a href="https://www.genecards.org/cgi-bin/carddisp.pl?gene=TMEM255B">https://www.genecards.org/cgi-bin/carddisp.pl?gene=TMEM255B</a>         |
| TOPAZ1       | Testis And Ovary Specific TOPAZ 1            | Protein Coding | 29 | GC03P044283 | 0.177573 | <a href="https://www.genecards.org/cgi-bin/carddisp.pl?gene=TOPAZ1">https://www.genecards.org/cgi-bin/carddisp.pl?gene=TOPAZ1</a>             |
| EMC9         | ER Membrane Protein Complex Subunit 9        | Protein Coding | 28 | GC14M024138 | 0.177573 | <a href="https://www.genecards.org/cgi-bin/carddisp.pl?gene=EMC9">https://www.genecards.org/cgi-bin/carddisp.pl?gene=EMC9</a>                 |
| MTARC2       | Mitochondrial Amidoxime Reducing Component 2 | Protein Coding | 28 | GC01P220748 | 0.177573 | <a href="https://www.genecards.org/cgi-bin/carddisp.pl?gene=MTARC2">https://www.genecards.org/cgi-bin/carddisp.pl?gene=MTARC2</a>             |
| REC114       | REC114 Meiotic Recombination Protein         | Protein Coding | 28 | GC15P073443 | 0.177573 | <a href="https://www.genecards.org/cgi-bin/carddisp.pl?gene=REC114">https://www.genecards.org/cgi-bin/carddisp.pl?gene=REC114</a>             |
| TENT2        | Terminal Nucleotidyltransferase 2            | Protein Coding | 28 | GC05P079613 | 0.177573 | <a href="https://www.genecards.org/cgi-bin/carddisp.pl?gene=TENT2">https://www.genecards.org/cgi-bin/carddisp.pl?gene=TENT2</a>               |
| TRIM6-TRIM34 | TRIM6-TRIM34 Readthrough                     | Protein Coding | 26 | GC11P005597 | 0.177573 | <a href="https://www.genecards.org/cgi-bin/carddisp.pl?gene=TRIM6-TRIM34">https://www.genecards.org/cgi-bin/carddisp.pl?gene=TRIM6-TRIM34</a> |

|              |                                                     |                |    |             |          |                                                                                                                                               |
|--------------|-----------------------------------------------------|----------------|----|-------------|----------|-----------------------------------------------------------------------------------------------------------------------------------------------|
| BAGE2        | BAGE Family Member 2, Pseudogene                    | Pseudo gene    | 21 | GC21P010413 | 0.177573 | <a href="https://www.genecards.org/cgi-bin/carddisp.pl?gene=BAGE2">https://www.genecards.org/cgi-bin/carddisp.pl?gene=BAGE2</a>               |
| CFAP92       | Cilia And Flagella Associated Protein 92 (Putative) | Protein Coding | 21 | GC03M130351 | 0.177573 | <a href="https://www.genecards.org/cgi-bin/carddisp.pl?gene=CFAP92">https://www.genecards.org/cgi-bin/carddisp.pl?gene=CFAP92</a>             |
| BORCS8-MEF2B | BORCS8-MEF2B Readthrough                            | Protein Coding | 20 | GC19M019146 | 0.177573 | <a href="https://www.genecards.org/cgi-bin/carddisp.pl?gene=BORCS8-MEF2B">https://www.genecards.org/cgi-bin/carddisp.pl?gene=BORCS8-MEF2B</a> |
| NPSR1-AS1    | NPSR1 Antisense RNA 1                               | RNA Gene       | 20 | GC07M034387 | 0.177573 | <a href="https://www.genecards.org/cgi-bin/carddisp.pl?gene=NPSR1-AS1">https://www.genecards.org/cgi-bin/carddisp.pl?gene=NPSR1-AS1</a>       |
| CLRN1-AS1    | CLRN1 Antisense RNA 1                               | RNA Gene       | 18 | GC03P150852 | 0.177573 | <a href="https://www.genecards.org/cgi-bin/carddisp.pl?gene=CLRN1-AS1">https://www.genecards.org/cgi-bin/carddisp.pl?gene=CLRN1-AS1</a>       |
| LINC00469    | Long Intergenic Non-Protein Coding RNA 469          | RNA Gene       | 18 | GC17M073750 | 0.177573 | <a href="https://www.genecards.org/cgi-bin/carddisp.pl?gene=LINC00469">https://www.genecards.org/cgi-bin/carddisp.pl?gene=LINC00469</a>       |
| MIR496       | MicroRNA 496                                        | RNA Gene       | 16 | GC14P109999 | 0.177573 | <a href="https://www.genecards.org/cgi-bin/carddisp.pl?gene=MIR496">https://www.genecards.org/cgi-bin/carddisp.pl?gene=MIR496</a>             |
| ANKRD34C-AS1 | ANKRD34C Antisense RNA 1                            | RNA Gene       | 14 | GC15M090452 | 0.177573 | <a href="https://www.genecards.org/cgi-bin/carddisp.pl?gene=ANKRD34C-AS1">https://www.genecards.org/cgi-bin/carddisp.pl?gene=ANKRD34C-AS1</a> |
| GAS5-AS1     | GAS5 Antisense RNA 1                                | RNA Gene       | 14 | GC01P173863 | 0.177573 | <a href="https://www.genecards.org/cgi-bin/carddisp.pl?gene=GAS5-AS1">https://www.genecards.org/cgi-bin/carddisp.pl?gene=GAS5-AS1</a>         |
| KLKP1        | Kallikrein Pseudogene 1                             | Pseudo gene    | 14 | GC19M066191 | 0.177573 | <a href="https://www.genecards.org/cgi-bin/carddisp.pl?gene=KLKP1">https://www.genecards.org/cgi-bin/carddisp.pl?gene=KLKP1</a>               |
| PRICKLE2-AS3 | PRICKLE2 Antisense RNA 3                            | RNA Gene       | 14 | GC03P064187 | 0.177573 | <a href="https://www.genecards.org/cgi-bin/carddisp.pl?gene=PRICKLE2-AS3">https://www.genecards.org/cgi-bin/carddisp.pl?gene=PRICKLE2-AS3</a> |
| C13orf42     | Chromosome 13 Open Reading Frame 42                 | Protein Coding | 13 | GC13M051166 | 0.177573 | <a href="https://www.genecards.org/cgi-bin/carddisp.pl?gene=C13orf42">https://www.genecards.org/cgi-bin/carddisp.pl?gene=C13orf42</a>         |
| LACTB2-AS1   | LACTB2 Antisense RNA 1                              | RNA Gene       | 13 | GC08P070608 | 0.177573 | <a href="https://www.genecards.org/cgi-bin/carddisp.pl?gene=LACTB2-AS1">https://www.genecards.org/cgi-bin/carddisp.pl?gene=LACTB2-AS1</a>     |
| LINC00331    | Long Intergenic Non-Protein Coding RNA 331          | RNA Gene       | 13 | GC13M078787 | 0.177573 | <a href="https://www.genecards.org/cgi-">https://www.genecards.org/cgi-</a>                                                                   |



|           |                                              |                |    |             |          |                                                                                                                                        |
|-----------|----------------------------------------------|----------------|----|-------------|----------|----------------------------------------------------------------------------------------------------------------------------------------|
|           |                                              |                |    |             |          | <a href="http://www.ncbi.nlm.nih.gov/ncbi/bin/carddisp.pl?gene=LINC00331">bin/carddisp.pl?gene=LINC00331</a>                           |
| SYT9-AS1  | SYT9 Antisense RNA 1                         | RNA Gene       | 13 | GC11M007384 | 0.177573 | <a href="http://www.genecards.org/cgi-bin/carddisp.pl?gene=SYT9-AS1">https://www.genecards.org/cgi-bin/carddisp.pl?gene=SYT9-AS1</a>   |
| ZNF815P   | Zinc Finger Protein 815, Pseudogene          | Pseudo gene    | 13 | GC07P005823 | 0.177573 | <a href="http://www.genecards.org/cgi-bin/carddisp.pl?gene=ZNF815P">https://www.genecards.org/cgi-bin/carddisp.pl?gene=ZNF815P</a>     |
| FILNC1    | FOXO Induced Long Non-Coding RNA 1           | RNA Gene       | 12 | GC06P139677 | 0.177573 | <a href="http://www.genecards.org/cgi-bin/carddisp.pl?gene=FILNC1">https://www.genecards.org/cgi-bin/carddisp.pl?gene=FILNC1</a>       |
| HRES1     | HTLV-1 Related Endogenous Sequence           | Pseudo gene    | 12 | GC01U990083 | 0.177573 | <a href="http://www.genecards.org/cgi-bin/carddisp.pl?gene=HRES1">https://www.genecards.org/cgi-bin/carddisp.pl?gene=HRES1</a>         |
| LINC00836 | Long Intergenic Non-Protein Coding RNA 836   | RNA Gene       | 12 | GC10P025651 | 0.177573 | <a href="http://www.genecards.org/cgi-bin/carddisp.pl?gene=LINC00836">https://www.genecards.org/cgi-bin/carddisp.pl?gene=LINC00836</a> |
| LINC01342 | Long Intergenic Non-Protein Coding RNA 1342  | RNA Gene       | 12 | GC01P003863 | 0.177573 | <a href="http://www.genecards.org/cgi-bin/carddisp.pl?gene=LINC01342">https://www.genecards.org/cgi-bin/carddisp.pl?gene=LINC01342</a> |
| LINC02367 | Long Intergenic Non-Protein Coding RNA 2367  | RNA Gene       | 12 | GC12P021743 | 0.177573 | <a href="http://www.genecards.org/cgi-bin/carddisp.pl?gene=LINC02367">https://www.genecards.org/cgi-bin/carddisp.pl?gene=LINC02367</a> |
| NIPAL4-DT | NIPAL4 Divergent Transcript                  | RNA Gene       | 12 | GC05M157364 | 0.177573 | <a href="http://www.genecards.org/cgi-bin/carddisp.pl?gene=NIPAL4-DT">https://www.genecards.org/cgi-bin/carddisp.pl?gene=NIPAL4-DT</a> |
| ADAM3B    | ADAM Metallopeptidase Domain 3B (Pseudogene) | Pseudo gene    | 11 | GC16M049517 | 0.177573 | <a href="http://www.genecards.org/cgi-bin/carddisp.pl?gene=ADAM3B">https://www.genecards.org/cgi-bin/carddisp.pl?gene=ADAM3B</a>       |
| IATPR     | ITGB1 Adjacent Tumor Promoting LncRNA        | RNA Gene       | 11 | GC10M033153 | 0.177573 | <a href="http://www.genecards.org/cgi-bin/carddisp.pl?gene=IATPR">https://www.genecards.org/cgi-bin/carddisp.pl?gene=IATPR</a>         |
| DNMT3AP1  | DNA Methyltransferase 3A Pseudogene 1        | Pseudo gene    | 9  | GC02M066819 | 0.177573 | <a href="http://www.genecards.org/cgi-bin/carddisp.pl?gene=DNMT3AP1">https://www.genecards.org/cgi-bin/carddisp.pl?gene=DNMT3AP1</a>   |
| ERVK-18   | Endogenous Retrovirus Group K Member 18      | Protein Coding | 9  | GC01U903332 | 0.177573 | <a href="http://www.genecards.org/cgi-bin/carddisp.pl?gene=ERVK-18">https://www.genecards.org/cgi-bin/carddisp.pl?gene=ERVK-18</a>     |
| ERVK-24   | Endogenous Retrovirus Group K Member 24      | Protein Coding | 9  | GC22U900840 | 0.177573 | <a href="http://www.genecards.org/cgi-bin/carddisp.pl?gene=ERVK-24">https://www.genecards.org/cgi-bin/carddisp.pl?gene=ERVK-24</a>     |

|              |                                                            |                   |   |             |          |                                                                                                                                               |
|--------------|------------------------------------------------------------|-------------------|---|-------------|----------|-----------------------------------------------------------------------------------------------------------------------------------------------|
| ISCA2P1      | Iron-Sulfur Cluster Assembly 2 Pseudogene 1                | Pseudo gene       | 9 | GC22M026644 | 0.177573 | <a href="https://www.genecards.org/cgi-bin/carddisp.pl?gene=ISCA2P1">https://www.genecards.org/cgi-bin/carddisp.pl?gene=ISCA2P1</a>           |
| LRRTM4-AS1   | LRRTM4 Antisense RNA 1                                     | RNA Gene          | 9 | GC02P076986 | 0.177573 | <a href="https://www.genecards.org/cgi-bin/carddisp.pl?gene=LRRTM4-AS1">https://www.genecards.org/cgi-bin/carddisp.pl?gene=LRRTM4-AS1</a>     |
| LOC102724560 | Cystathionine Beta-Synthase Like                           | Protein Coding    | 8 | GC21M006444 | 0.177573 | <a href="https://www.genecards.org/cgi-bin/carddisp.pl?gene=LOC102724560">https://www.genecards.org/cgi-bin/carddisp.pl?gene=LOC102724560</a> |
| FRAXA        | Fragile Site, Folic Acid Type, Rare, Fra(X)(Q27.3) A       | Biological Region | 7 | GC0XP147950 | 0.177573 | <a href="https://www.genecards.org/cgi-bin/carddisp.pl?gene=FRAXA">https://www.genecards.org/cgi-bin/carddisp.pl?gene=FRAXA</a>               |
| ERVK-11      | Endogenous Retrovirus Group K Member 11                    | Protein Coding    | 6 | GC03U901891 | 0.177573 | <a href="https://www.genecards.org/cgi-bin/carddisp.pl?gene=ERVK-11">https://www.genecards.org/cgi-bin/carddisp.pl?gene=ERVK-11</a>           |
| PPIAP33      | Peptidylprolyl Isomerase A Pseudogene 33                   | Pseudo gene       | 5 | GC09P007499 | 0.177573 | <a href="https://www.genecards.org/cgi-bin/carddisp.pl?gene=PPIAP33">https://www.genecards.org/cgi-bin/carddisp.pl?gene=PPIAP33</a>           |
| ERVK-1       | Endogenous Retrovirus Group K Member 1                     | Uncategorized     | 3 | GC01U903451 | 0.177573 | <a href="https://www.genecards.org/cgi-bin/carddisp.pl?gene=ERVK-1">https://www.genecards.org/cgi-bin/carddisp.pl?gene=ERVK-1</a>             |
| LOC101927484 | Uncharacterized LOC101927484                               | RNA Gene          | 3 | GC12M055023 | 0.177573 | <a href="https://www.genecards.org/cgi-bin/carddisp.pl?gene=LOC101927484">https://www.genecards.org/cgi-bin/carddisp.pl?gene=LOC101927484</a> |
| LOC106627981 | GBA Recombination Region                                   | Biological Region | 3 | GC01P155233 | 0.177573 | <a href="https://www.genecards.org/cgi-bin/carddisp.pl?gene=LOC106627981">https://www.genecards.org/cgi-bin/carddisp.pl?gene=LOC106627981</a> |
| HSERP RODH   | Human-Specific Endogenous Retroviral Insert PRODH Enhancer | Biological Region | 2 | GC22P037156 | 0.177573 | <a href="https://www.genecards.org/cgi-bin/carddisp.pl?gene=HSERP RODH">https://www.genecards.org/cgi-bin/carddisp.pl?gene=HSERP RODH</a>     |

**Table S5. List of 244 common genes (data obtained from venny)**

| Common genes |
|--------------|
| IL6ST        |
| TYK2         |
| BLK          |
| MIF          |
| MMP2         |
| ABCB1        |
| PTGS2        |
| ALOX5        |

|          |
|----------|
| PRKCQ    |
| PTGS1    |
| ADORA2A  |
| HSD11B1  |
| STS      |
| CTSD     |
| NR3C1    |
| PTK2     |
| ABCG2    |
| MECP2    |
| PRKCH    |
| MAPK14   |
| EGFR     |
| AKT1     |
| ESR1     |
| AR       |
| JAK1     |
| JAK2     |
| JAK3     |
| KDR      |
| MMP1     |
| MMP3     |
| MMP9     |
| MMP13    |
| NOS3     |
| PDE2A    |
| PIK3CA   |
| PIK3CB   |
| MAPK8    |
| STAT3    |
| BTK      |
| TLR4     |
| TNFRSF1A |
| TYMS     |
| DDR1     |
| PARP1    |
| PTGES    |
| CTSK     |
| NOS2     |
| P2RX7    |
| PPARG    |
| CASP1    |
| ESR2     |
| FLT1     |

|          |
|----------|
| BRAF     |
| ADA      |
| CNR2     |
| CYP1A2   |
| DHODH    |
| MTOR     |
| IGF1R    |
| MDM2     |
| ROS1     |
| TSPO     |
| CD38     |
| CSF1R    |
| HTR2A    |
| CXCR2    |
| PRKCA    |
| REN      |
| ADAMTS5  |
| CCR1     |
| ERBB2    |
| ALOX15   |
| HSP90AA1 |
| CXCR1    |
| MAP3K5   |
| DDR2     |
| PDE3A    |
| PFKFB3   |
| PPIA     |
| PRKCB    |
| RPS6KA3  |
| TACR1    |
| PER2     |
| CDK2     |
| CFTR     |
| CNR1     |
| CPB1     |
| CRHR1    |
| ADRA1A   |
| ADRA2B   |
| CYP3A5   |
| F2R      |
| FLT4     |
| BRD4     |
| GSK3B    |
| HDAC1    |

|         |
|---------|
| INSR    |
| KCNMA1  |
| MET     |
| NOS1    |
| NOX4    |
| PAK1    |
| PDE7A   |
| PDGFRA  |
| ENPP2   |
| PGR     |
| RORC    |
| SLC6A2  |
| BRS3    |
| CA1     |
| SPHK1   |
| MBD2    |
| HDAC9   |
| HDAC6   |
| CDK4    |
| PIM2    |
| CHEK2   |
| CHRM3   |
| ADORA3  |
| GPBAR1  |
| CTSS    |
| CYP1A1  |
| CYP2B6  |
| CYP2C19 |
| CYP3A4  |
| NQO1    |
| AGTR1   |
| DYRK1A  |
| S1PR3   |
| ELANE   |
| EPHA3   |
| AKT2    |
| F10     |
| FGFR1   |
| FLT3    |
| FPR1    |
| BRD1    |
| ALOX5AP |
| QPCT    |
| GCK     |

|          |
|----------|
| HCRTR1   |
| LCK      |
| MAPT     |
| MTNR1B   |
| P2RX3    |
| P2RY1    |
| PDPK1    |
| PIM1     |
| PLK1     |
| ATR      |
| EGLN1    |
| PPARA    |
| PRCP     |
| PRKCZ    |
| MAPK9    |
| MAPK10   |
| PSEN1    |
| SPHK2    |
| PTGER4   |
| RET      |
| SCD      |
| SMO      |
| SRC      |
| AURKA    |
| TACR2    |
| TACR3    |
| TGFBR1   |
| TRPV1    |
| CA2      |
| CASR     |
| HDAC4    |
| CDK1     |
| SYK      |
| MAP3K8   |
| LRRK2    |
| PRKCD    |
| CYP2C9   |
| OPRM1    |
| TGFBR2   |
| CCR8     |
| PDGFRB   |
| ALPL     |
| MAPKAPK2 |
| RIPK2    |

|          |
|----------|
| MAP2K6   |
| HTR3A    |
| MC4R     |
| MAP2K3   |
| HSP90AB1 |
| BAD      |
| PRKDC    |
| FAAH     |
| MTNR1A   |
| HDAC2    |
| GRM5     |
| PLA2G7   |
| EPHA2    |
| AOC3     |
| CAPN2    |
| PTGER1   |
| METAP2   |
| DRD4     |
| LTA4H    |
| CETP     |
| CPT1A    |
| TOP1     |
| DRD1     |
| DRD3     |
| OPRD1    |
| LDHB     |
| PKM      |
| ITK      |
| LYN      |
| ACHE     |
| CAPN1    |
| CDC25B   |
| ERN1     |
| CCKAR    |
| PTPN1    |
| FYN      |
| BACE2    |
| SCN9A    |
| ABL1     |
| PTGIR    |
| HUNK     |
| ILK      |
| NR3C2    |
| GCGR     |

|         |
|---------|
| PDE5A   |
| GNRHR   |
| ADRA2C  |
| MAP3K12 |
| CSNK2A1 |
| NR1H4   |
| AKR1B1  |
| CTSV    |
| ADORA1  |
| HDAC10  |
| CHRM2   |
| ADORA2B |
| ECE2    |
| TNNI3K  |
| FGR     |
| HCK     |



**Table S6. Result of PPI network analysis in String Database**

|    | Identifier           | Node degree |
|----|----------------------|-------------|
| 1  | 9606.ENSP00000362680 | 54          |
| 2  | 9606.ENSP00000335153 | 43          |
| 3  | 9606.ENSP00000264657 | 41          |
| 4  | 9606.ENSP00000263967 | 40          |
| 5  | 9606.ENSP00000451828 | 34          |
| 6  | 9606.ENSP00000337825 | 32          |
| 7  | 9606.ENSP00000346671 | 29          |
| 8  | 9606.ENSP00000428924 | 27          |
| 9  | 9606.ENSP00000275493 | 26          |
| 10 | 9606.ENSP00000378974 | 24          |
| 11 | 9606.ENSP00000371067 | 23          |
| 12 | 9606.ENSP00000444986 | 22          |
| 12 | 9606.ENSP00000343204 | 22          |
| 12 | 9606.ENSP00000341189 | 22          |
| 12 | 9606.ENSP00000229795 | 22          |
| 16 | 9606.ENSP00000405330 | 20          |
| 17 | 9606.ENSP00000363117 | 19          |
| 17 | 9606.ENSP00000367830 | 19          |
| 17 | 9606.ENSP00000362649 | 19          |
| 20 | 9606.ENSP00000289153 | 18          |

**Table S7. Results of KEGG analysis in ShinyGO 0.76 platform.**

| Enrichment FDR | nGenes | Pathway Genes | Fold Enrichment | Pathway                                 | URL                                                                                                                   | Genes                                                                                                                                                                                                                                                                                                                                 |
|----------------|--------|---------------|-----------------|-----------------------------------------|-----------------------------------------------------------------------------------------------------------------------|---------------------------------------------------------------------------------------------------------------------------------------------------------------------------------------------------------------------------------------------------------------------------------------------------------------------------------------|
| 1.11E-13       | 58     | 530           | 3.120662        | Pathways in cancer                      | <a href="http://www.genome.jp/kegg-bin/show_pathway?hsa05200">http://www.genome.jp/kegg-bin/show_pathway?hsa05200</a> | BAD NOS2 FLT4 MAPK9 PIK3CB PTGS2 FGFR1 HSP90AA1 GSK3B MMP2 ESR1 HSP90AB1 JAK2 ABL1 MMP9 PIM2 AKT2 JAK3 MET TGFBR1 MAPK8 MAPK10 PDGFRB HDAC1 PIK3CA FLT3 CDK2 SMO PPARG IL6ST PDGFRA CDK4 MDM2 EGLN1 PIM1 ESR2 IGF1R ERBB2 AKT1 AGTR1 EGFR PRKCA BRAF PTGER1 JAK1 TGFBR2 RET PRKCB STAT3 AR PTK2 PTGER4 NQO1 F2R CSF1R HDAC2 MMP1 MTOR |
| 1.31E-13       | 35     | 240           | 4.797242        | Calcium signaling pathway               | <a href="http://www.genome.jp/kegg-bin/show_pathway?hsa04020">http://www.genome.jp/kegg-bin/show_pathway?hsa04020</a> | CD38 NOS2 FLT4 SPHK2 TACR2 FGFR1 P2RX7 NOS1 HTR2A FLT1 MET P2RX3 PDGFRB TACR1 ADRA1A KDR ADORA2A CHRM3 PDGFRA ERBB2 AGTR1 EGFR PRKCA PTGER1 CCKAR NOS3 RET PRKCB GRM5 TACR3 ADORA2B SPHK1 CHRM2 F2R DRD1                                                                                                                              |
| 1.31E-13       | 42     | 350           | 3.983165        | Neuroactive ligand-receptor interaction | <a href="http://www.genome.jp/kegg-bin/show_pathway?hsa04080">http://www.genome.jp/kegg-bin/show_pathway?hsa04080</a> | TACR2 P2RX7 TSPO BRS3 HTR2A GNRHR P2RX3 OPRM1 NR3C1 TACR1 OPRD1 CNR1 ADRA1A HCRTR1 ADORA2A CHRM3 MTNR1B AGTR1 DRD3 PTGIR PTGER1 CCKAR ADORA1 MC4R MTNR1A GRM5 TACR3 P2RY1 ADORA2B FPR1 PTGER4 CHRM2 F2R ADRA2C DRD1 CNR2 TRPV1 S1PR3 ADRA2B DRD4 ADORA3 GCGR                                                                          |
| 3.09E-12       | 19     | 100           | 8.494709        | Progesterone-mediated oocyte maturation | <a href="http://www.genome.jp/kegg-bin/show_pathway?hsa04914">http://www.genome.jp/kegg-bin/show_pathway?hsa04914</a> | MAPK9 PIK3CB HSP90AA1 PGR AURKA HSP90AB1 CDC25B AKT2 MAPK8 MAPK10 MAPK14 PIK3CA CDK2 IGF1R AKT1 BRAF PLK1 CDK1 RPS6KA3                                                                                                                                                                                                                |
| 1.00E-11       | 22     | 108           | 6.663082        | Insulin resistance                      | <a href="http://www.genome.jp/kegg-bin/show_pathway?hsa04931">http://www.genome.jp/kegg-bin/show_pathway?hsa04931</a> | MAPK9 PIK3CB PRKCQ TNFRSF1A PRKCZ GSK3B AKT2 MAPK8 MAPK10 CPT1A PIK3CA PDPK1 AKT1 PRKCD NOS3 PRKCB STAT3 INSR RPS6KA3 PPARA PTPN1 MTOR                                                                                                                                                                                                |

|          |    |     |          |                                                      |                                                                                                                       |                                                                                                                                                                                                                                |
|----------|----|-----|----------|------------------------------------------------------|-----------------------------------------------------------------------------------------------------------------------|--------------------------------------------------------------------------------------------------------------------------------------------------------------------------------------------------------------------------------|
| 2.15E-11 | 23 | 119 | 6.082942 | Sphingolipid signaling pathway                       | <a href="http://www.genome.jp/kegg-bin/show_pathway?hsa04071">http://www.genome.jp/kegg-bin/show_pathway?hsa04071</a> | FYN MAPK9 PIK3CB SPHK2 TNFRSF1A PRKCZ AKT2 MAPK8 MAPK10 MAPK14 OPRD1 CTSD PIK3CA PDPK1 AKT1 PRKCA ADORA1 NOS3 PRKCB SPHK1 MAP3K5 S1PR3 ADORA3                                                                                  |
| 8.78E-11 | 22 | 95  | 5.987118 | Endocrine resistance                                 | <a href="http://www.genome.jp/kegg-bin/show_pathway?hsa01522">http://www.genome.jp/kegg-bin/show_pathway?hsa01522</a> | BAD MAPK9 PIK3CB MMP2 ESR1 MMP9 AKT2 MAPK8 MAPK10 MAPK14 PIK3CA CDK4 MDM2 ESR2 IGF1R ERBB2 AKT1 EGFR BRAF PTK2 SRC MTOR                                                                                                        |
| 1.69E-10 | 21 | 79  | 6.066667 | EGFR tyrosine kinase inhibitor resistance            | <a href="http://www.genome.jp/kegg-bin/show_pathway?hsa01521">http://www.genome.jp/kegg-bin/show_pathway?hsa01521</a> | BAD PIK3CB GSK3B JAK2 AKT2 MET PDGFRB PIK3CA KDR PDGFRA IGF1R ERBB2 AKT1 EGFR PRKCA BRAF JAK1 PRKCB STAT3 SRC MTOR                                                                                                             |
| 1.69E-10 | 30 | 210 | 4.20398  | Rap1 signaling pathway                               | <a href="http://www.genome.jp/kegg-bin/show_pathway?hsa04015">http://www.genome.jp/kegg-bin/show_pathway?hsa04015</a> | MAP2K3 FLT4 PIK3CB PRKCZ FGFR1 FLT1 AKT2 MET MAP2K6 MAPK14 PDGFRB CNR1 PIK3CA KDR ADORA2A PDGFRA IGF1R AKT1 EPHA2 EGFR PRKCA BRAF PRKCB P2RY1 ADORA2B FPR1 INSR F2R CSF1R SRC                                                  |
| 2.25E-10 | 34 | 214 | 3.711886 | Lipid and atherosclerosis                            | <a href="http://www.genome.jp/kegg-bin/show_pathway?hsa05417">http://www.genome.jp/kegg-bin/show_pathway?hsa05417</a> | BAD MAP2K3 MAPK9 PIK3CB TNFRSF1A HSP90AA1 GSK3B HSP90AB1 JAK2 MMP9 AKT2 MAPK8 MAP2K6 MAPK10 MAPK14 PIK3CA PPARG TLR4 CASP1 CYP2C9 CYP1A1 PDPK1 AKT1 MMP3 PRKCA NOS3 STAT3 PTK2 ERN1 MMP1 SRC CYP2B6 MAP3K5 LYN                 |
| 4.32E-10 | 25 | 203 | 4.790249 | Diabetic cardiomyopathy                              | <a href="http://www.genome.jp/kegg-bin/show_pathway?hsa05415">http://www.genome.jp/kegg-bin/show_pathway?hsa05415</a> | MAPK9 PIK3CB PRKCZ GSK3B MMP2 MMP9 AKT2 TGFBF1 MAPK8 MAPK10 MAPK14 CTSD PIK3CA AKT1 PARP1 REN AGTR1 PRKCA TGFBF2 PRKCD NOS3 PRKCB INSR PPARA MTOR                                                                              |
| 5.63E-10 | 36 | 294 | 3.414141 | MAPK signaling pathway                               | <a href="http://www.genome.jp/kegg-bin/show_pathway?hsa04010">http://www.genome.jp/kegg-bin/show_pathway?hsa04010</a> | MAP2K3 FLT4 MAPK9 TNFRSF1A FGFR1 CDC25B FLT1 AKT2 MET TGFBF1 MAPK8 MAP3K8 MAP2K6 MAPK10 MAPK14 PDGFRB FLT3 KDR PDGFRA MAP3K12 IGF1R ERBB2 AKT1 EPHA2 EGFR PAK1 PRKCA BRAF MAPKAPK2 TGFBF2 PRKCB INSR RPS6KA3 CSF1R MAP3K5 MAPT |
| 1.86E-09 | 21 | 129 | 5.328829 | Relaxin signaling pathway                            | <a href="http://www.genome.jp/kegg-bin/show_pathway?hsa04926">http://www.genome.jp/kegg-bin/show_pathway?hsa04926</a> | NOS2 MAPK9 PIK3CB PRKCZ MMP2 NOS1 MMP9 AKT2 TGFBF1 MAPK8 MAPK10 MAPK14 PIK3CA MMP13 AKT1 EGFR PRKCA TGFBF2 NOS3 MMP1 SRC                                                                                                       |
| 2.03E-09 | 22 | 97  | 5.03794  | Prostate cancer                                      | <a href="http://www.genome.jp/kegg-bin/show_pathway?hsa05215">http://www.genome.jp/kegg-bin/show_pathway?hsa05215</a> | BAD PIK3CB FGFR1 HSP90AA1 GSK3B HSP90AB1 MMP9 AKT2 PDGFRB PIK3CA CDK2 PDGFRA MDM2 IGF1R PDPK1 ERBB2 AKT1 EGFR MMP3 BRAF AR MTOR                                                                                                |
| 2.20E-09 | 19 | 84  | 5.848816 | ErbB signaling pathway                               | <a href="http://www.genome.jp/kegg-bin/show_pathway?hsa04012">http://www.genome.jp/kegg-bin/show_pathway?hsa04012</a> | BAD MAPK9 PIK3CB GSK3B ABL1 AKT2 MAPK8 MAPK10 PIK3CA ERBB2 AKT1 EGFR PAK1 PRKCA BRAF PRKCB PTK2 SRC MTOR                                                                                                                       |
| 2.43E-09 | 28 | 200 | 3.953216 | Focal adhesion                                       | <a href="http://www.genome.jp/kegg-bin/show_pathway?hsa04510">http://www.genome.jp/kegg-bin/show_pathway?hsa04510</a> | BAD FYN FLT4 MAPK9 PIK3CB GSK3B FLT1 AKT2 MET MAPK8 MAPK10 PDGFRB PIK3CA KDR PDGFRA IGF1R PDPK1 ERBB2 AKT1 EGFR PAK1 PRKCA BRAF CAPN2 ILK PRKCB PTK2 SRC                                                                       |
| 3.39E-09 | 18 | 68  | 6.035714 | Fc epsilon RI signaling pathway                      | <a href="http://www.genome.jp/kegg-bin/show_pathway?hsa04664">http://www.genome.jp/kegg-bin/show_pathway?hsa04664</a> | BTK FYN MAP2K3 MAPK9 PIK3CB AKT2 MAPK8 MAP2K6 MAPK10 MAPK14 PIK3CA ALOX5AP PDPK1 AKT1 PRKCA SYK LYN ALOX5                                                                                                                      |
| 4.09E-09 | 16 | 59  | 6.828283 | VEGF signaling pathway                               | <a href="http://www.genome.jp/kegg-bin/show_pathway?hsa04370">http://www.genome.jp/kegg-bin/show_pathway?hsa04370</a> | BAD PIK3CB SPHK2 PTGS2 AKT2 MAPK14 PIK3CA KDR AKT1 PRKCA MAPKAPK2 NOS3 PRKCB PTK2 SPHK1 SRC                                                                                                                                    |
| 5.27E-09 | 22 | 100 | 4.748404 | AGE-RAGE signaling pathway in diabetic complications | <a href="http://www.genome.jp/kegg-bin/show_pathway?hsa04933">http://www.genome.jp/kegg-bin/show_pathway?hsa04933</a> | MAPK9 PIK3CB PRKCZ NOX4 MMP2 JAK2 AKT2 TGFBF1 MAPK8 MAPK10 MAPK14 PIK3CA CDK4 PIM1 AKT1 AGTR1 PRKCA TGFBF2 PRKCD NOS3 PRKCB STAT3                                                                                              |
| 8.04E-09 | 37 | 354 | 3.007696 | PI3K-Akt signaling pathway                           | <a href="http://www.genome.jp/kegg-bin/show_pathway?hsa04151">http://www.genome.jp/kegg-bin/show_pathway?hsa04151</a> | BAD FLT4 PIK3CB FGFR1 HSP90AA1 GSK3B HSP90AB1 JAK2 FLT1 AKT2 JAK3 MET PDGFRB PIK3CA FLT3 CDK2 KDR PDGFRA CDK4 MDM2 TLR4 IGF1R PDPK1 ERBB2 AKT1 EPHA2 EGFR PRKCA JAK1 NOS3 SYK PTK2 INSR CHRM2 F2R CSF1R MTOR                   |
| 1.59E-08 | 24 | 197 | 4.134557 | Chemical carcinogenesis                              | <a href="http://www.genome.jp/kegg-bin/show_pathway?hsa05207">http://www.genome.jp/kegg-bin/show_pathway?hsa05207</a> | BAD PIK3CB HSP90AA1 PGR ESR1 HSP90AB1 JAK2 AKT2 PIK3CA ESR2 CYP1A1 CYP1A2 AKT1 EGFR PRKCA CYP3A4 PRKCB STAT3 AR RPS6KA3 PPARA SRC CYP2B6 MTOR                                                                                  |
| 2.70E-08 | 19 | 148 | 5.025039 | Phospholipase D signaling pathway                    | <a href="http://www.genome.jp/kegg-bin/show_pathway?hsa04072">http://www.genome.jp/kegg-bin/show_pathway?hsa04072</a> | FYN PIK3CB SPHK2 AKT2 PDGFRB PIK3CA PDGFRA AKT1 AGTR1 EGFR PRKCA CXCR1 SYK GRM5 INSR SPHK1 CXCR2 F2R MTOR                                                                                                                      |
| 7.39E-08 | 16 | 70  | 5.668763 | Central carbon metabolism in cancer                  | <a href="http://www.genome.jp/kegg-bin/show_pathway?hsa05230">http://www.genome.jp/kegg-bin/show_pathway?hsa05230</a> | PIK3CB PKM FGFR1 AKT2 MET GCK LDHB PDGFRB PIK3CA FLT3 PDGFRA ERBB2 AKT1 EGFR RET MTOR                                                                                                                                          |
| 8.76E-08 | 17 | 98  | 5.233151 | Inflammatory mediator regulation of TRP channels     | <a href="http://www.genome.jp/kegg-bin/show_pathway?hsa04750">http://www.genome.jp/kegg-bin/show_pathway?hsa04750</a> | PRKCH MAP2K3 MAPK9 PIK3CB PRKCQ HTR2A MAPK8 MAP2K6 MAPK10 MAPK14 PIK3CA PRKCA PRKCD PRKCB PTGER4 TRPV1 SRC                                                                                                                     |
| 8.76E-08 | 17 | 76  | 5.233151 | Pancreatic cancer                                    | <a href="http://www.genome.jp/kegg-bin/show_pathway?hsa05212">http://www.genome.jp/kegg-bin/show_pathway?hsa05212</a> | BAD MAPK9 PIK3CB AKT2 TGFBF1 MAPK8 MAPK10 PIK3CA CDK4 ERBB2 AKT1 EGFR BRAF JAK1 TGFBF2 STAT3 MTOR                                                                                                                              |
| 1.36E-07 | 26 | 202 | 3.462569 | Proteoglycans in cancer                              | <a href="http://www.genome.jp/kegg-bin/show_pathway?hsa05205">http://www.genome.jp/kegg-bin/show_pathway?hsa05205</a> | PIK3CB FGFR1 MMP2 ESR1 MMP9 AKT2 MET MAPK14 PIK3CA KDR SMO MDM2 TLR4 IGF1R PDPK1 ERBB2 AKT1 EGFR PAK1 PRKCA BRAF PRKCB STAT3 PTK2 SRC MTOR                                                                                     |

|          |    |     |          |                                                        |                                                                                                                       |                                                                                                                                                               |
|----------|----|-----|----------|--------------------------------------------------------|-----------------------------------------------------------------------------------------------------------------------|---------------------------------------------------------------------------------------------------------------------------------------------------------------|
| 1.44E-07 | 25 | 161 | 3.556397 | Hepatitis B                                            | <a href="http://www.genome.jp/kegg-bin/show_pathway?hsa05161">http://www.genome.jp/kegg-bin/show_pathway?hsa05161</a> | BAD MAP2K3 MAPK9 PIK3CB JAK2 MMP9 AKT2 TYK2 JAK3 TGFBR1 MAPK8 MAP2K6 MAPK10 MAPK14 PIK3CA CDK2 TLR4 AKT1 PRKCA BRAF JAK1 TGFBR2 PRKCB STAT3 SRC               |
| 2.00E-07 | 26 | 194 | 3.390432 | Kaposi sarcoma-associated herpesvirus infection        | <a href="http://www.genome.jp/kegg-bin/show_pathway?hsa05167">http://www.genome.jp/kegg-bin/show_pathway?hsa05167</a> | MAPK9 PIK3CB TNFRSF1A PTGS2 GSK3B JAK2 HCK AKT2 TYK2 MAPK8 MAP2K6 MAPK10 MAPK14 PIK3CA IL6ST CDK4 AKT1 JAK1 MAPKAPK2 CCR1 SYK STAT3 CCR8 SRC MTOR LYN         |
| 2.14E-07 | 19 | 109 | 4.404664 | HIF-1 signaling pathway                                | <a href="http://www.genome.jp/kegg-bin/show_pathway?hsa04066">http://www.genome.jp/kegg-bin/show_pathway?hsa04066</a> | NOS2 PIK3CB FLT1 AKT2 LDHB PIK3CA EGLN1 TLR4 IGF1R ERBB2 AKT1 EGFR PRKCA NOS3 PRKCB STAT3 PFKFB3 INSR MTOR                                                    |
| 2.32E-07 | 16 | 72  | 5.180077 | Non-small cell lung cancer                             | <a href="http://www.genome.jp/kegg-bin/show_pathway?hsa05223">http://www.genome.jp/kegg-bin/show_pathway?hsa05223</a> | BAD PIK3CB AKT2 JAK3 MET PIK3CA CDK4 PDPK1 ERBB2 AKT1 EGFR PRKCA BRAF RET PRKCB STAT3                                                                         |
| 2.37E-07 | 25 | 231 | 3.451797 | Ras signaling pathway                                  | <a href="http://www.genome.jp/kegg-bin/show_pathway?hsa04014">http://www.genome.jp/kegg-bin/show_pathway?hsa04014</a> | BAD FLT4 MAPK9 PIK3CB FGFR1 ABL1 FLT1 AKT2 MET MAPK8 MAPK10 PDGFRB PIK3CA FLT3 KDR PDGFRA IGF1R AKT1 EPHA2 EGFR PAK1 PRKCA PRKCB INSR CSF1R                   |
| 3.67E-07 | 19 | 119 | 4.247354 | Neurotrophin signaling pathway                         | <a href="http://www.genome.jp/kegg-bin/show_pathway?hsa04722">http://www.genome.jp/kegg-bin/show_pathway?hsa04722</a> | BAD MAPK9 PIK3CB PSEN1 GSK3B ABL1 RIPK2 AKT2 MAPK8 MAPK10 MAPK14 PIK3CA PDPK1 AKT1 BRAF MAPKAPK2 PRKCD RPS6KA3 MAP3K5                                         |
| 7.68E-07 | 17 | 138 | 4.496088 | Estrogen signaling pathway                             | <a href="http://www.genome.jp/kegg-bin/show_pathway?hsa04915">http://www.genome.jp/kegg-bin/show_pathway?hsa04915</a> | PIK3CB HSP90AA1 PGR MMP2 ESR1 HSP90AB1 MMP9 AKT2 OPRM1 CTSD PIK3CA ESR2 AKT1 EGFR PRKCD NOS3 SRC                                                              |
| 7.79E-07 | 21 | 138 | 3.720126 | Fluid shear stress and atherosclerosis                 | <a href="http://www.genome.jp/kegg-bin/show_pathway?hsa05418">http://www.genome.jp/kegg-bin/show_pathway?hsa05418</a> | MAPK9 PIK3CB TNFRSF1A PRKCZ HSP90AA1 MMP2 HSP90AB1 MMP9 AKT2 MAPK8 MAP2K6 MAPK10 MAPK14 PIK3CA KDR AKT1 NOS3 PTK2 NQO1 SRC MAP3K5                             |
| 8.50E-07 | 15 | 70  | 5.029762 | Prolactin signaling pathway                            | <a href="http://www.genome.jp/kegg-bin/show_pathway?hsa04917">http://www.genome.jp/kegg-bin/show_pathway?hsa04917</a> | MAPK9 PIK3CB GSK3B ESR1 JAK2 AKT2 GCK MAPK8 MAPK10 MAPK14 PIK3CA ESR2 AKT1 STAT3 SRC                                                                          |
| 1.06E-06 | 19 | 131 | 3.964198 | FoxO signaling pathway                                 | <a href="http://www.genome.jp/kegg-bin/show_pathway?hsa04068">http://www.genome.jp/kegg-bin/show_pathway?hsa04068</a> | MAPK9 PIK3CB AKT2 TGFBR1 MAPK8 MAPK10 MAPK14 PIK3CA CDK2 MDM2 IGF1R PDPK1 AKT1 EGFR BRAF TGFBR2 PLK1 STAT3 INSR                                               |
| 1.06E-06 | 17 | 119 | 4.372907 | Growth hormone synthesis, secretion and action         | <a href="http://www.genome.jp/kegg-bin/show_pathway?hsa04935">http://www.genome.jp/kegg-bin/show_pathway?hsa04935</a> | MAP2K3 MAPK9 PIK3CB GSK3B JAK2 AKT2 MAPK8 MAP2K6 MAPK10 MAPK14 PIK3CA AKT1 PRKCA PRKCB STAT3 PTK2 MTOR                                                        |
| 1.13E-06 | 24 | 191 | 3.2657   | Chemokine signaling pathway                            | <a href="http://www.genome.jp/kegg-bin/show_pathway?hsa04062">http://www.genome.jp/kegg-bin/show_pathway?hsa04062</a> | FGR BAD PIK3CB PRKCZ GSK3B JAK2 HCK AKT2 JAK3 ITK PIK3CA AKT1 PAK1 BRAF CXCR1 CCR1 PRKCD PRKCB STAT3 PTK2 CCR8 CXCR2 SRC LYN                                  |
| 1.13E-06 | 11 | 46  | 6.885185 | Type II diabetes mellitus                              | <a href="http://www.genome.jp/kegg-bin/show_pathway?hsa04930">http://www.genome.jp/kegg-bin/show_pathway?hsa04930</a> | MAPK9 PIK3CB PKM PRKCZ GCK MAPK8 MAPK10 PIK3CA PRKCD INSR MTOR                                                                                                |
| 1.52E-06 | 21 | 126 | 3.552553 | Osteoclast differentiation                             | <a href="http://www.genome.jp/kegg-bin/show_pathway?hsa04380">http://www.genome.jp/kegg-bin/show_pathway?hsa04380</a> | BTK FYN MAPK9 PIK3CB TNFRSF1A AKT2 TYK2 TGFBR1 MAPK8 MAP2K6 MAPK10 MAPK14 PIK3CA PPARG AKT1 CTSK JAK1 TGFBR2 SYK CSF1R LCK                                    |
| 1.94E-06 | 16 | 124 | 4.418301 | Platelet activation                                    | <a href="http://www.genome.jp/kegg-bin/show_pathway?hsa04611">http://www.genome.jp/kegg-bin/show_pathway?hsa04611</a> | BTK FYN PIK3CB PRKCZ PTGS1 AKT2 MAPK14 PIK3CA AKT1 PTGIR NOS3 SYK P2RY1 F2R SRC LYN                                                                           |
| 2.15E-06 | 27 | 383 | 2.897143 | Alzheimer disease                                      | <a href="http://www.genome.jp/kegg-bin/show_pathway?hsa05010">http://www.genome.jp/kegg-bin/show_pathway?hsa05010</a> | BAD NOS2 CAPN1 MAPK9 PIK3CB TNFRSF1A PTGS2 PSEN1 GSK3B NOX4 NOS1 CSNK2A1 AKT2 MAPK8 MAPK10 PIK3CA CHRM3 AKT1 BRAF CAPN2 GRM5 INSR ERN1 BACE2 MAP3K5 MTOR MAPT |
| 3.40E-06 | 24 | 224 | 3.06576  | Human cytomegalovirus infection                        | <a href="http://www.genome.jp/kegg-bin/show_pathway?hsa05163">http://www.genome.jp/kegg-bin/show_pathway?hsa05163</a> | PIK3CB TNFRSF1A PTGS2 GSK3B AKT2 MAP2K6 MAPK14 PIK3CA PDGFRA CDK4 MDM2 AKT1 EGFR PRKCA PTGER1 JAK1 CCR1 PRKCB STAT3 PTK2 PTGER4 CXCR2 SRC MTOR                |
| 3.73E-06 | 18 | 159 | 3.797753 | Necroptosis                                            | <a href="http://www.genome.jp/kegg-bin/show_pathway?hsa04217">http://www.genome.jp/kegg-bin/show_pathway?hsa04217</a> | CAPN1 MAPK9 TNFRSF1A HSP90AA1 HSP90AB1 JAK2 TYK2 JAK3 MAPK8 MAPK10 TLR4 CASP1 PARP1 ALOX15 JAK1 CAPN2 STAT3 PPIA                                              |
| 4.10E-06 | 16 | 137 | 4.17284  | Insulin signaling pathway                              | <a href="http://www.genome.jp/kegg-bin/show_pathway?hsa04910">http://www.genome.jp/kegg-bin/show_pathway?hsa04910</a> | BAD MAPK9 PIK3CB PRKCZ GSK3B AKT2 GCK MAPK8 MAPK10 PIK3CA PDPK1 AKT1 BRAF INSR PTPN1 MTOR                                                                     |
| 4.40E-06 | 22 | 203 | 3.202412 | Viral carcinogenesis                                   | <a href="http://www.genome.jp/kegg-bin/show_pathway?hsa05203">http://www.genome.jp/kegg-bin/show_pathway?hsa05203</a> | BAD HDAC9 PIK3CB PKM HDAC4 HDAC10 JAK3 HDAC1 PIK3CA CDK2 IL6ST CDK4 MDM2 JAK1 MAPKAPK2 SYK STAT3 CDK1 CCR8 HDAC2 SRC LYN                                      |
| 4.40E-06 | 14 | 75  | 4.694444 | Glioma                                                 | <a href="http://www.genome.jp/kegg-bin/show_pathway?hsa05214">http://www.genome.jp/kegg-bin/show_pathway?hsa05214</a> | PIK3CB AKT2 PDGFRB PIK3CA PDGFRA CDK4 MDM2 IGF1R AKT1 EGFR PRKCA BRAF PRKCB MTOR                                                                              |
| 5.76E-06 | 21 | 161 | 3.258953 | MicroRNAs in cancer                                    | <a href="http://www.genome.jp/kegg-bin/show_pathway?hsa05206">http://www.genome.jp/kegg-bin/show_pathway?hsa05206</a> | PIK3CB HDAC4 PTGS2 ABCB1 ABL1 MMP9 CDC25B MET PDGFRB HDAC1 PIK3CA PDGFRA MDM2 PIM1 ERBB2 EGFR PRKCA PRKCB STAT3 HDAC2 MTOR                                    |
| 6.04E-06 | 23 | 246 | 3.041471 | Shigellosis                                            | <a href="http://www.genome.jp/kegg-bin/show_pathway?hsa05131">http://www.genome.jp/kegg-bin/show_pathway?hsa05131</a> | CAPN1 MAPK9 PIK3CB PRKCQ TNFRSF1A GSK3B RIPK2 AKT2 MAPK8 MAPK10 MAPK14 PIK3CA MDM2 TLR4 CASP1 AKT1 EGFR CAPN2 PRKCD ILK PTK2 SRC MTOR                         |
| 6.46E-06 | 14 | 72  | 4.532567 | Melanoma                                               | <a href="http://www.genome.jp/kegg-bin/show_pathway?hsa05218">http://www.genome.jp/kegg-bin/show_pathway?hsa05218</a> | BAD PIK3CB FGFR1 AKT2 MET PDGFRB PIK3CA PDGFRA CDK4 MDM2 IGF1R AKT1 EGFR BRAF                                                                                 |
| 6.52E-06 | 16 | 89  | 4.005926 | PD-L1 expression and PD-1 checkpoint pathway in cancer | <a href="http://www.genome.jp/kegg-bin/show_pathway?hsa05235">http://www.genome.jp/kegg-bin/show_pathway?hsa05235</a> | MAP2K3 PIK3CB PRKCQ JAK2 CSNK2A1 AKT2 MAP2K6 MAPK14 PIK3CA TLR4 AKT1 EGFR JAK1 STAT3 LCK MTOR                                                                 |

|          |    |     |          |                                                            |                                                                                                                       |                                                                                                                                                                   |
|----------|----|-----|----------|------------------------------------------------------------|-----------------------------------------------------------------------------------------------------------------------|-------------------------------------------------------------------------------------------------------------------------------------------------------------------|
| 7.62E-06 | 16 | 166 | 3.953216 | CGMP-PKG signaling pathway                                 | <a href="http://www.genome.jp/kegg-bin/show_pathway?hsa04022">http://www.genome.jp/kegg-bin/show_pathway?hsa04022</a> | BAD AKT2 OPRD1 ADRA1A PDE5A AKT1 AGTR1 KCNMA1 ADORA1 NOS3 INSR PDE3A ADRA2C PDE2A ADRA2B ADORA3                                                                   |
| 7.62E-06 | 14 | 98  | 4.455744 | Choline metabolism in cancer                               | <a href="http://www.genome.jp/kegg-bin/show_pathway?hsa05231">http://www.genome.jp/kegg-bin/show_pathway?hsa05231</a> | MAPK9 PIK3CB AKT2 MAPK8 MAPK10 PDGFRB PIK3CA PDGFRA PDPK1 AKT1 EGFR PRKCA PRKCB MTOR                                                                              |
| 7.65E-06 | 19 | 190 | 3.430556 | Neutrophil extracellular trap formation                    | <a href="http://www.genome.jp/kegg-bin/show_pathway?hsa04613">http://www.genome.jp/kegg-bin/show_pathway?hsa04613</a> | HDAC9 PIK3CB HDAC6 HDAC10 AKT2 MAPK14 HDAC1 PIK3CA TLR4 CASP1 AKT1 PRKCA SYK PRKCB FPR1 HDAC2 SRC MTOR ELANE                                                      |
| 8.22E-06 | 18 | 112 | 3.557895 | Toxoplasmosis                                              | <a href="http://www.genome.jp/kegg-bin/show_pathway?hsa05145">http://www.genome.jp/kegg-bin/show_pathway?hsa05145</a> | BAD NOS2 MAP2K3 MAPK9 TNFRSF1A JAK2 AKT2 TYK2 MAPK8 MAP2K6 MAPK10 MAPK14 TLR4 PDPK1 AKT1 JAK1 STAT3 ALOX5                                                         |
| 8.38E-06 | 12 | 69  | 5.121212 | Adipocytokine signaling pathway                            | <a href="http://www.genome.jp/kegg-bin/show_pathway?hsa04920">http://www.genome.jp/kegg-bin/show_pathway?hsa04920</a> | MAPK9 PRKCQ TNFRSF1A JAK2 AKT2 MAPK8 MAPK10 CPT1A AKT1 STAT3 PPARA MTOR                                                                                           |
| 8.97E-06 | 13 | 93  | 4.694444 | GnRH signaling pathway                                     | <a href="http://www.genome.jp/kegg-bin/show_pathway?hsa04912">http://www.genome.jp/kegg-bin/show_pathway?hsa04912</a> | MAP2K3 MAPK9 MMP2 MAPK8 MAP2K6 GNRHR MAPK10 MAPK14 EGFR PRKCA PRKCD PRKCB SRC                                                                                     |
| 9.31E-06 | 15 | 141 | 4.082126 | Autophagy                                                  | <a href="http://www.genome.jp/kegg-bin/show_pathway?hsa04140">http://www.genome.jp/kegg-bin/show_pathway?hsa04140</a> | BAD MAPK9 PIK3CB PRKCQ AKT2 MAPK8 MAPK10 CTSD PIK3CA IGF1R PDPK1 AKT1 PRKCD ERN1 MTOR                                                                             |
| 9.31E-06 | 19 | 135 | 3.365828 | Apoptosis                                                  | <a href="http://www.genome.jp/kegg-bin/show_pathway?hsa04210">http://www.genome.jp/kegg-bin/show_pathway?hsa04210</a> | BAD CAPN1 MAPK9 PIK3CB TNFRSF1A AKT2 MAPK8 MAPK10 CTSD PIK3CA CTSV PDPK1 AKT1 CTSK PARP1 CAPN2 CTSS ERN1 MAP3K5                                                   |
| 9.31E-06 | 17 | 103 | 3.669221 | T cell receptor signaling pathway                          | <a href="http://www.genome.jp/kegg-bin/show_pathway?hsa04660">http://www.genome.jp/kegg-bin/show_pathway?hsa04660</a> | FYN MAPK9 PIK3CB PRKCQ GSK3B AKT2 MAPK8 MAP3K8 MAPK10 MAPK14 ITK PIK3CA CDK4 PDPK1 AKT1 PAK1 LCK                                                                  |
| 9.31E-06 | 15 | 121 | 4.082126 | Thyroid hormone signaling pathway                          | <a href="http://www.genome.jp/kegg-bin/show_pathway?hsa04919">http://www.genome.jp/kegg-bin/show_pathway?hsa04919</a> | BAD PIK3CB GSK3B ESR1 AKT2 HDAC1 PIK3CA MDM2 PDPK1 AKT1 PRKCA PRKCB HDAC2 SRC MTOR                                                                                |
| 9.86E-06 | 12 | 71  | 5.007407 | Adherens junction                                          | <a href="http://www.genome.jp/kegg-bin/show_pathway?hsa04520">http://www.genome.jp/kegg-bin/show_pathway?hsa04520</a> | FYN FGFR1 CSNK2A1 MET TGFBR1 IGF1R ERBB2 EGFR TGFBR2 INSR PTPN1 SRC                                                                                               |
| 1.19E-05 | 19 | 156 | 3.303498 | Cellular senescence                                        | <a href="http://www.genome.jp/kegg-bin/show_pathway?hsa04218">http://www.genome.jp/kegg-bin/show_pathway?hsa04218</a> | CAPN1 MAP2K3 PIK3CB AKT2 TGFBR1 MAP2K6 MAPK14 PIK3CA CDK2 CDK4 MDM2 AKT1 MAPKAPK2 CAPN2 TGFBR2 CDK1 ATR CHEK2 MTOR                                                |
| 1.32E-05 | 18 | 108 | 3.414141 | Th17 cell differentiation                                  | <a href="http://www.genome.jp/kegg-bin/show_pathway?hsa04659">http://www.genome.jp/kegg-bin/show_pathway?hsa04659</a> | MAPK9 PRKCQ HSP90AA1 HSP90AB1 JAK2 TYK2 JAK3 TGFBR1 MAPK8 MAPK10 MAPK14 IL6ST RORC JAK1 TGFBR2 STAT3 LCK MTOR                                                     |
| 1.76E-05 | 14 | 120 | 4.107639 | AMPK signaling pathway                                     | <a href="http://www.genome.jp/kegg-bin/show_pathway?hsa04152">http://www.genome.jp/kegg-bin/show_pathway?hsa04152</a> | CFTR PIK3CB SCD AKT2 CPT1A ADRA1A PIK3CA PPARG IGF1R PDPK1 AKT1 PFKFB3 INSR MTOR                                                                                  |
| 2.08E-05 | 16 | 104 | 3.619813 | C-type lectin receptor signaling pathway                   | <a href="http://www.genome.jp/kegg-bin/show_pathway?hsa04625">http://www.genome.jp/kegg-bin/show_pathway?hsa04625</a> | MAPK9 PIK3CB PTGS2 AKT2 MAPK8 MAPK10 MAPK14 PIK3CA MDM2 CASP1 AKT1 PAK1 MAPKAPK2 PRKCD SYK SRC                                                                    |
| 2.64E-05 | 27 | 475 | 2.497537 | Pathways of neurodegeneration                              | <a href="http://www.genome.jp/kegg-bin/show_pathway?hsa05022">http://www.genome.jp/kegg-bin/show_pathway?hsa05022</a> | BAD NOS2 CAPN1 MAP2K3 MAPK9 TNFRSF1A PTGS2 PSEN1 GSK3B NOX4 NOS1 CSNK2A1 MAPK8 MAP2K6 MAPK10 MAPK14 CHRM3 PRKCA BRAF CAPN2 PRKCB GRM5 ERN1 LRRK2 MAP3K5 MTOR MAPT |
| 2.81E-05 | 13 | 97  | 4.208812 | Fc gamma R-mediated phagocytosis                           | <a href="http://www.genome.jp/kegg-bin/show_pathway?hsa04666">http://www.genome.jp/kegg-bin/show_pathway?hsa04666</a> | PIK3CB SPHK2 HCK AKT2 PIK3CA AKT1 PAK1 PRKCA PRKCD SYK PRKCB SPHK1 LYN                                                                                            |
| 2.91E-05 | 17 | 167 | 3.360234 | Hepatocellular carcinoma                                   | <a href="http://www.genome.jp/kegg-bin/show_pathway?hsa05225">http://www.genome.jp/kegg-bin/show_pathway?hsa05225</a> | BAD PIK3CB GSK3B AKT2 MET TGFBR1 PIK3CA CDK4 IGF1R AKT1 EGFR PRKCA BRAF TGFBR2 PRKCB NQO1 MTOR                                                                    |
| 3.18E-05 | 16 | 181 | 3.49354  | Axon guidance                                              | <a href="http://www.genome.jp/kegg-bin/show_pathway?hsa04360">http://www.genome.jp/kegg-bin/show_pathway?hsa04360</a> | FYN EPHA3 PIK3CB PRKCZ GSK3B ABL1 MET PIK3CA SMO PDPK1 EPHA2 PAK1 PRKCA ILK PTK2 SRC                                                                              |
| 3.29E-05 | 13 | 67  | 4.137476 | Acute myeloid leukemia                                     | <a href="http://www.genome.jp/kegg-bin/show_pathway?hsa05221">http://www.genome.jp/kegg-bin/show_pathway?hsa05221</a> | BAD PIK3CB PIM2 AKT2 PIK3CA FLT3 PER2 PIM1 AKT1 BRAF STAT3 CSF1R MTOR                                                                                             |
| 3.39E-05 | 14 | 86  | 3.866013 | Colorectal cancer                                          | <a href="http://www.genome.jp/kegg-bin/show_pathway?hsa05210">http://www.genome.jp/kegg-bin/show_pathway?hsa05210</a> | BAD MAPK9 PIK3CB GSK3B AKT2 TGFBR1 MAPK8 MAPK10 PIK3CA AKT1 EGFR BRAF TGFBR2 MTOR                                                                                 |
| 3.48E-05 | 11 | 58  | 4.803618 | Endometrial cancer                                         | <a href="http://www.genome.jp/kegg-bin/show_pathway?hsa05213">http://www.genome.jp/kegg-bin/show_pathway?hsa05213</a> | BAD PIK3CB GSK3B AKT2 PIK3CA PDPK1 ERBB2 AKT1 EGFR BRAF ILK                                                                                                       |
| 5.50E-05 | 11 | 113 | 4.590123 | Cholinergic synapse                                        | <a href="http://www.genome.jp/kegg-bin/show_pathway?hsa04725">http://www.genome.jp/kegg-bin/show_pathway?hsa04725</a> | FYN PIK3CB ACHE JAK2 AKT2 PIK3CA CHRM3 AKT1 PRKCA PRKCB CHRM2                                                                                                     |
| 5.55E-05 | 13 | 76  | 3.937276 | Chronic myeloid leukemia                                   | <a href="http://www.genome.jp/kegg-bin/show_pathway?hsa05220">http://www.genome.jp/kegg-bin/show_pathway?hsa05220</a> | BAD PIK3CB ABL1 AKT2 TGFBR1 HDAC1 PIK3CA CDK4 MDM2 AKT1 BRAF TGFBR2 HDAC2                                                                                         |
| 6.21E-05 | 16 | 147 | 3.301587 | Breast cancer                                              | <a href="http://www.genome.jp/kegg-bin/show_pathway?hsa05224">http://www.genome.jp/kegg-bin/show_pathway?hsa05224</a> | FLT4 PIK3CB FGFR1 PGR GSK3B ESR1 AKT2 PIK3CA CDK4 ESR2 IGF1R ERBB2 AKT1 EGFR BRAF MTOR                                                                            |
| 6.35E-05 | 14 | 154 | 3.651235 | MTOR signaling pathway                                     | <a href="http://www.genome.jp/kegg-bin/show_pathway?hsa04150">http://www.genome.jp/kegg-bin/show_pathway?hsa04150</a> | PIK3CB TNFRSF1A GSK3B AKT2 PIK3CA IGF1R PDPK1 AKT1 PRKCA BRAF PRKCB INSR RPS6KA3 MTOR                                                                             |
| 6.55E-05 | 11 | 70  | 4.490338 | Epithelial cell signaling in Helicobacter pylori infection | <a href="http://www.genome.jp/kegg-bin/show_pathway?hsa05120">http://www.genome.jp/kegg-bin/show_pathway?hsa05120</a> | MAPK9 MET MAPK8 MAPK10 MAPK14 EGFR PAK1 CXCR1 CXCR2 SRC LYN                                                                                                       |
| 6.64E-05 | 22 | 202 | 2.648148 | Epstein-Barr virus infection                               | <a href="http://www.genome.jp/kegg-bin/show_pathway?hsa05169">http://www.genome.jp/kegg-bin/show_pathway?hsa05169</a> | BTK MAP2K3 MAPK9 PIK3CB AKT2 TYK2 JAK3 MAPK8 MAP2K6 MAPK10 MAPK14 HDAC1 PIK3CA CDK2 CDK4 MDM2 AKT1 JAK1 SYK STAT3 HDAC2 LYN                                       |

|          |    |      |          |                                                          |                                                                                                                       |                                                                                                                                                                                                                                                                |
|----------|----|------|----------|----------------------------------------------------------|-----------------------------------------------------------------------------------------------------------------------|----------------------------------------------------------------------------------------------------------------------------------------------------------------------------------------------------------------------------------------------------------------|
| 7.62E-05 | 20 | 210  | 2.781893 | Human immunodeficiency virus 1 infection                 | <a href="http://www.genome.jp/kegg-bin/show_pathway?hsa05170">http://www.genome.jp/kegg-bin/show_pathway?hsa05170</a> | BAD MAP2K3 MAPK9 PIK3CB TNFRSF1A AKT2 MAPK8 MAP2K6 MAPK10 MAPK14 PIK3CA TLR4 AKT1 PAK1 PRKCA PRKCB PTK2 CDK1 ATR MTOR                                                                                                                                          |
| 7.63E-05 | 15 | 155  | 3.393574 | Non-alcoholic fatty liver disease                        | <a href="http://www.genome.jp/kegg-bin/show_pathway?hsa04932">http://www.genome.jp/kegg-bin/show_pathway?hsa04932</a> | MAPK9 PIK3CB TNFRSF1A GSK3B AKT2 MAPK8 MAPK10 MAPK14 PIK3CA PPARG AKT1 INSR ERN1 PPARA MAP3K5                                                                                                                                                                  |
| 8.51E-05 | 17 | 137  | 3.069444 | Yersinia infection                                       | <a href="http://www.genome.jp/kegg-bin/show_pathway?hsa05135">http://www.genome.jp/kegg-bin/show_pathway?hsa05135</a> | MAP2K3 MAPK9 PIK3CB GSK3B AKT2 MAPK8 MAP2K6 MAPK10 MAPK14 PIK3CA TLR4 CASP1 AKT1 PTK2 RPS6KA3 LCK SRC                                                                                                                                                          |
| 9.77E-05 | 10 | 148  | 4.694444 | Retrograde endocannabinoid signaling                     | <a href="http://www.genome.jp/kegg-bin/show_pathway?hsa04723">http://www.genome.jp/kegg-bin/show_pathway?hsa04723</a> | MAPK9 PTGS2 MAPK8 MAPK10 MAPK14 FAAH CNR1 PRKCA PRKCB GRM5                                                                                                                                                                                                     |
| 0.000101 | 12 | 132  | 3.953216 | Dopaminergic synapse                                     | <a href="http://www.genome.jp/kegg-bin/show_pathway?hsa04728">http://www.genome.jp/kegg-bin/show_pathway?hsa04728</a> | MAPK9 GSK3B AKT2 MAPK8 MAPK10 MAPK14 AKT1 DRD3 PRKCA PRKCB DRD1 DRD4                                                                                                                                                                                           |
| 0.000125 | 18 | 219  | 2.864407 | CAMP signaling pathway                                   | <a href="http://www.genome.jp/kegg-bin/show_pathway?hsa04024">http://www.genome.jp/kegg-bin/show_pathway?hsa04024</a> | CFTR BAD MAPK9 PIK3CB AKT2 MAPK8 MAPK10 PIK3CA ADORA2A AKT1 PAK1 BRAF ADORA1 PDE3A CHRM2 F2R DRD1 PPARA                                                                                                                                                        |
| 0.000137 | 19 | 179  | 2.744444 | Tuberculosis                                             | <a href="http://www.genome.jp/kegg-bin/show_pathway?hsa05152">http://www.genome.jp/kegg-bin/show_pathway?hsa05152</a> | BAD NOS2 MAPK9 SPHK2 TNFRSF1A JAK2 RIPK2 AKT2 MAPK8 MAPK10 MAPK14 CTSD TLR4 AKT1 JAK1 CTSS SYK SPHK1 SRC                                                                                                                                                       |
| 0.000137 | 24 | 331  | 2.397163 | Human papillomavirus infection                           | <a href="http://www.genome.jp/kegg-bin/show_pathway?hsa05165">http://www.genome.jp/kegg-bin/show_pathway?hsa05165</a> | BAD PIK3CB TNFRSF1A PKM PRKCZ PTGS2 PSEN1 GSK3B AKT2 TYK2 PDGFRB HDAC1 PIK3CA CDK2 CDK4 MDM2 AKT1 EGFR JAK1 PTK2 PTGER4 ATR HDAC2 MTOR                                                                                                                         |
| 0.000153 | 44 | 1527 | 1.807926 | Metabolic pathways                                       | <a href="http://www.genome.jp/kegg-bin/show_pathway?hsa01100">http://www.genome.jp/kegg-bin/show_pathway?hsa01100</a> | CD38 NOS2 PIK3CB SPHK2 PKM PTGS2 AKR1B1 NOS1 PTGS1 SCD STS DHODH CA2 CYP3A5 GCK LTA4H LDHB HSD11B1 PIK3CA AOC3 CA1 ENPP2 CYP2C9 PDE5A CYP1A1 CYP1A2 PLA2G7 PTGES CYP3A4 ALOX15 ALPL NOS3 CYP2C19 PFKFB3 PDE3A SPHK1 TYMS NQO1 PDE2A ADA CYP2B6 PDE7A ALOX5 MIF |
| 0.000157 | 16 | 141  | 3.034792 | Alcoholic liver disease                                  | <a href="http://www.genome.jp/kegg-bin/show_pathway?hsa04936">http://www.genome.jp/kegg-bin/show_pathway?hsa04936</a> | MAP2K3 MAPK9 TNFRSF1A GSK3B NOX4 SCD AKT2 MAPK8 MAP2K6 MAPK10 CPT1A MAPK14 TLR4 AKT1 PPARA MAP3K5                                                                                                                                                              |
| 0.00016  | 11 | 112  | 4.050109 | Serotonergic synapse                                     | <a href="http://www.genome.jp/kegg-bin/show_pathway?hsa04726">http://www.genome.jp/kegg-bin/show_pathway?hsa04726</a> | PTGS2 PTGS1 HTR2A CYP2C9 PRKCA BRAF ALOX15 CYP2C19 PRKCB HTR3A ALOX5                                                                                                                                                                                           |
| 0.000179 | 13 | 143  | 3.487302 | Signaling pathways regulating pluripotency of stem cells | <a href="http://www.genome.jp/kegg-bin/show_pathway?hsa04550">http://www.genome.jp/kegg-bin/show_pathway?hsa04550</a> | PIK3CB FGFR1 GSK3B JAK2 AKT2 JAK3 MAPK14 PIK3CA IL6ST IGF1R AKT1 JAK1 STAT3                                                                                                                                                                                    |
| 0.000199 | 8  | 56   | 5.365079 | Regulation of lipolysis in adipocytes                    | <a href="http://www.genome.jp/kegg-bin/show_pathway?hsa04923">http://www.genome.jp/kegg-bin/show_pathway?hsa04923</a> | PIK3CB PTGS2 PTGS1 AKT2 PIK3CA AKT1 ADORA1 INSR                                                                                                                                                                                                                |
| 0.0002   | 17 | 139  | 2.850198 | Measles                                                  | <a href="http://www.genome.jp/kegg-bin/show_pathway?hsa05162">http://www.genome.jp/kegg-bin/show_pathway?hsa05162</a> | BAD MAPK9 PIK3CB GSK3B CSNK2A1 AKT2 TYK2 JAK3 MAPK8 MAPK10 PIK3CA CDK2 CDK4 TLR4 AKT1 JAK1 STAT3                                                                                                                                                               |
| 0.000206 | 20 | 232  | 2.572298 | Coronavirus disease                                      | <a href="http://www.genome.jp/kegg-bin/show_pathway?hsa05171">http://www.genome.jp/kegg-bin/show_pathway?hsa05171</a> | MAPK9 PIK3CB TNFRSF1A TYK2 MAPK8 MAPK10 MAPK14 PIK3CA IL6ST TLR4 CASP1 AGTR1 EGFR MMP3 PRKCA JAK1 SYK PRKCB STAT3 MMP1                                                                                                                                         |
| 0.000215 | 9  | 62   | 4.694444 | Longevity regulating pathway                             | <a href="http://www.genome.jp/kegg-bin/show_pathway?hsa04213">http://www.genome.jp/kegg-bin/show_pathway?hsa04213</a> | PIK3CB AKT2 HDAC1 PIK3CA IGF1R AKT1 INSR HDAC2 MTOR                                                                                                                                                                                                            |
| 0.000239 | 16 | 112  | 2.916936 | TNF signaling pathway                                    | <a href="http://www.genome.jp/kegg-bin/show_pathway?hsa04668">http://www.genome.jp/kegg-bin/show_pathway?hsa04668</a> | MAP2K3 MAPK9 PIK3CB TNFRSF1A PTGS2 MMP9 AKT2 MAPK8 MAP3K8 MAP2K6 MAPK10 MAPK14 PIK3CA AKT1 MMP3 MAP3K5                                                                                                                                                         |
| 0.000292 | 12 | 126  | 3.520833 | Cell cycle                                               | <a href="http://www.genome.jp/kegg-bin/show_pathway?hsa04110">http://www.genome.jp/kegg-bin/show_pathway?hsa04110</a> | GSK3B ABL1 CDC25B HDAC1 CDK4 MDM2 PLK1 CDK1 ATR CHEK2 HDAC2 PRKDC                                                                                                                                                                                              |
| 0.000343 | 7  | 37   | 5.714976 | Aldosterone-regulated sodium reabsorption                | <a href="http://www.genome.jp/kegg-bin/show_pathway?hsa04960">http://www.genome.jp/kegg-bin/show_pathway?hsa04960</a> | PIK3CB PIK3CA PDPK1 NR3C2 PRKCA PRKCB INSR                                                                                                                                                                                                                     |
| 0.000387 | 12 | 134  | 3.414141 | Vascular smooth muscle contraction                       | <a href="http://www.genome.jp/kegg-bin/show_pathway?hsa04270">http://www.genome.jp/kegg-bin/show_pathway?hsa04270</a> | PRKCH PRKCQ ADRA1A ADORA2A AGTR1 PRKCA KCNMA1 BRAF PTGIR PRKCD PRKCB ADORA2B                                                                                                                                                                                   |
| 0.000401 | 8  | 61   | 4.845878 | Arachidonic acid metabolism                              | <a href="http://www.genome.jp/kegg-bin/show_pathway?hsa00590">http://www.genome.jp/kegg-bin/show_pathway?hsa00590</a> | PTGS2 PTGS1 LTA4H CYP2C9 ALOX15 CYP2C19 CYP2B6 ALOX5                                                                                                                                                                                                           |
| 0.000505 | 8  | 91   | 4.694444 | Morphine addiction                                       | <a href="http://www.genome.jp/kegg-bin/show_pathway?hsa05032">http://www.genome.jp/kegg-bin/show_pathway?hsa05032</a> | OPRM1 PRKCA ADORA1 PRKCB PDE3A DRD1 PDE2A PDE7A                                                                                                                                                                                                                |
| 0.000539 | 14 | 148  | 2.953808 | Gastric cancer                                           | <a href="http://www.genome.jp/kegg-bin/show_pathway?hsa05226">http://www.genome.jp/kegg-bin/show_pathway?hsa05226</a> | PIK3CB GSK3B ABCB1 AKT2 MET TGFBF1 PIK3CA CDK2 ERBB2 AKT1 EGFR BRAF TGFBF2 MTOR                                                                                                                                                                                |
| 0.000665 | 12 | 142  | 3.219048 | Spinocerebellar ataxia                                   | <a href="http://www.genome.jp/kegg-bin/show_pathway?hsa05017">http://www.genome.jp/kegg-bin/show_pathway?hsa05017</a> | MAPK9 PIK3CB AKT2 MAPK8 MAPK10 PIK3CA AKT1 PRKCA PRKCB ERN1 MAP3K5 MTOR                                                                                                                                                                                        |
| 0.000696 | 9  | 101  | 4.02381  | Pancreatic secretion                                     | <a href="http://www.genome.jp/kegg-bin/show_pathway?hsa04972">http://www.genome.jp/kegg-bin/show_pathway?hsa04972</a> | CFTR CD38 CA2 CHRM3 CPB1 PRKCA KCNMA1 CCKAR PRKCB                                                                                                                                                                                                              |

|              |    |     |          |                                              |                                                                                                                       |                                                                                                                  |
|--------------|----|-----|----------|----------------------------------------------|-----------------------------------------------------------------------------------------------------------------------|------------------------------------------------------------------------------------------------------------------|
| 0.00076<br>5 | 8  | 41  | 4.418301 | Bladder cancer                               | <a href="http://www.genome.jp/kegg-bin/show_pathway?hsa05219">http://www.genome.jp/kegg-bin/show_pathway?hsa05219</a> | MMP2 MMP9 MDM2 ERBB2 EGFR BRAF MMP1 SRC                                                                          |
| 0.00090<br>2 | 5  | 47  | 7.222222 | Carbohydrate digestion and absorption        | <a href="http://www.genome.jp/kegg-bin/show_pathway?hsa04973">http://www.genome.jp/kegg-bin/show_pathway?hsa04973</a> | PIK3CB AKT2 PIK3CA AKT1 PRKCB                                                                                    |
| 0.00090<br>3 | 13 | 101 | 2.941098 | Chagas disease                               | <a href="http://www.genome.jp/kegg-bin/show_pathway?hsa05142">http://www.genome.jp/kegg-bin/show_pathway?hsa05142</a> | NOS2 MAPK9 PIK3CB TNFRSF1A AKT2 TGFBR1 MAPK8 MAPK10 MAPK14 PIK3CA TLR4 AKT1 TGFBR2                               |
| 0.00096<br>3 | 11 | 138 | 3.27866  | Apelin signaling pathway                     | <a href="http://www.genome.jp/kegg-bin/show_pathway?hsa04371">http://www.genome.jp/kegg-bin/show_pathway?hsa04371</a> | NOS2 SPHK2 HDAC4 NOS1 AKT2 TGFBR1 AKT1 AGTR1 NOS3 SPHK1 MTOR                                                     |
| 0.00096<br>3 | 9  | 88  | 3.840909 | Gap junction                                 | <a href="http://www.genome.jp/kegg-bin/show_pathway?hsa04540">http://www.genome.jp/kegg-bin/show_pathway?hsa04540</a> | HTR2A PDGFRB PDGFRA EGFR PRKCA PRKCB GRM5 DRD1 SRC                                                               |
| 0.00109<br>5 | 15 | 192 | 2.632399 | Transcriptional misregulation in cancer      | <a href="http://www.genome.jp/kegg-bin/show_pathway?hsa05202">http://www.genome.jp/kegg-bin/show_pathway?hsa05202</a> | MMP9 FLT1 MET HDAC1 FLT3 PPARG PER2 MDM2 IGF1R MMP3 TGFBR2 PTK2 CSF1R HDAC2 ELANE                                |
| 0.00116<br>6 | 7  | 74  | 4.694444 | Metabolism of xenobiotics by cytochrome P450 | <a href="http://www.genome.jp/kegg-bin/show_pathway?hsa00980">http://www.genome.jp/kegg-bin/show_pathway?hsa00980</a> | CYP3A5 HSD11B1 CYP2C9 CYP1A1 CYP1A2 CYP3A4 CYP2B6                                                                |
| 0.00119<br>1 | 15 | 157 | 2.608025 | Hepatitis C                                  | <a href="http://www.genome.jp/kegg-bin/show_pathway?hsa05160">http://www.genome.jp/kegg-bin/show_pathway?hsa05160</a> | BAD PIK3CB TNFRSF1A GSK3B AKT2 TYK2 PIK3CA CDK2 CDK4 AKT1 EGFR BRAF JAK1 STAT3 PPARG                             |
| 0.00144<br>3 | 7  | 75  | 4.532567 | PPAR signaling pathway                       | <a href="http://www.genome.jp/kegg-bin/show_pathway?hsa03320">http://www.genome.jp/kegg-bin/show_pathway?hsa03320</a> | SCD CPT1A PPARG PDPK1 ILK PPARG MMP1                                                                             |
| 0.00171<br>8 | 18 | 222 | 2.283784 | Human T-cell leukemia virus 1 infection      | <a href="http://www.genome.jp/kegg-bin/show_pathway?hsa05166">http://www.genome.jp/kegg-bin/show_pathway?hsa05166</a> | MAPK9 PIK3CB TNFRSF1A TSPO AKT2 JAK3 TGFBR1 MAPK8 MAPK10 PIK3CA CDK2 CDK4 AKT1 JAK1 TGFBR2 ATR LCK CHEK2         |
| 0.00174      | 6  | 68  | 5.121212 | Retinol metabolism                           | <a href="http://www.genome.jp/kegg-bin/show_pathway?hsa00830">http://www.genome.jp/kegg-bin/show_pathway?hsa00830</a> | CYP3A5 CYP2C9 CYP1A1 CYP1A2 CYP3A4 CYP2B6                                                                        |
| 0.00185<br>7 | 13 | 103 | 2.712346 | Toll-like receptor signaling pathway         | <a href="http://www.genome.jp/kegg-bin/show_pathway?hsa04620">http://www.genome.jp/kegg-bin/show_pathway?hsa04620</a> | MAP2K3 MAPK9 PIK3CB AKT2 MAPK8 MAP3K8 MAP2K6 MAPK10 MAPK14 PIK3CA TLR4 AKT1 CTSK                                 |
| 0.00206<br>1 | 9  | 68  | 3.44898  | Renal cell carcinoma                         | <a href="http://www.genome.jp/kegg-bin/show_pathway?hsa05211">http://www.genome.jp/kegg-bin/show_pathway?hsa05211</a> | BAD PIK3CB AKT2 MET PIK3CA EGLN1 AKT1 PAK1 BRAF                                                                  |
| 0.00218      | 17 | 249 | 2.296563 | Salmonella infection                         | <a href="http://www.genome.jp/kegg-bin/show_pathway?hsa05132">http://www.genome.jp/kegg-bin/show_pathway?hsa05132</a> | MAP2K3 MAPK9 PIK3CB TNFRSF1A HSP90AA1 HSP90AB1 RIPK2 AKT2 MAPK8 MAP2K6 MAPK10 MAPK14 PIK3CA TLR4 CASP1 AKT1 PAK1 |
| 0.00239<br>5 | 5  | 29  | 5.868056 | Linoleic acid metabolism                     | <a href="http://www.genome.jp/kegg-bin/show_pathway?hsa00591">http://www.genome.jp/kegg-bin/show_pathway?hsa00591</a> | CYP2C9 CYP1A2 CYP3A4 ALOX15 CYP2C19                                                                              |
| 0.00269      | 9  | 73  | 3.313725 | Platinum drug resistance                     | <a href="http://www.genome.jp/kegg-bin/show_pathway?hsa01524">http://www.genome.jp/kegg-bin/show_pathway?hsa01524</a> | BAD PIK3CB AKT2 PIK3CA MDM2 PDPK1 ERBB2 AKT1 MAP3K5                                                              |
| 0.00269      | 9  | 129 | 3.313725 | Oocyte meiosis                               | <a href="http://www.genome.jp/kegg-bin/show_pathway?hsa04114">http://www.genome.jp/kegg-bin/show_pathway?hsa04114</a> | PGR AURKA MAPK14 CDK2 IGF1R PLK1 AR CDK1 RPS6KA3                                                                 |
| 0.00276<br>4 | 12 | 93  | 2.714859 | IL-17 signaling pathway                      | <a href="http://www.genome.jp/kegg-bin/show_pathway?hsa04657">http://www.genome.jp/kegg-bin/show_pathway?hsa04657</a> | MAPK9 PTGS2 HSP90AA1 GSK3B HSP90AB1 MMP9 MAPK8 MAPK10 MAPK14 MMP13 MMP3 MMP1                                     |
| 0.00402<br>8 | 8  | 107 | 3.414141 | Glucagon signaling pathway                   | <a href="http://www.genome.jp/kegg-bin/show_pathway?hsa04922">http://www.genome.jp/kegg-bin/show_pathway?hsa04922</a> | PKM AKT2 GSK3B CPT1A LDHB AKT1 PPARG GCGR                                                                        |
| 0.00512<br>2 | 6  | 69  | 4.17284  | Drug metabolism                              | <a href="http://www.genome.jp/kegg-bin/show_pathway?hsa00982">http://www.genome.jp/kegg-bin/show_pathway?hsa00982</a> | CYP3A5 CYP2C9 CYP1A2 CYP3A4 CYP2C19 CYP2B6                                                                       |
| 0.00745<br>8 | 6  | 86  | 3.885057 | Insulin secretion                            | <a href="http://www.genome.jp/kegg-bin/show_pathway?hsa04911">http://www.genome.jp/kegg-bin/show_pathway?hsa04911</a> | GSK3B CHRM3 PRKCA KCNA1 CCKAR PRKCB                                                                              |
| 0.00770<br>3 | 15 | 162 | 2.150127 | JAK-STAT signaling pathway                   | <a href="http://www.genome.jp/kegg-bin/show_pathway?hsa04630">http://www.genome.jp/kegg-bin/show_pathway?hsa04630</a> | PIK3CB JAK2 AKT2 TYK2 JAK3 PDGFRB PIK3CA IL6ST PDGFRA PIM1 AKT1 EGFR JAK1 STAT3 MTOR                             |
| 0.00803<br>8 | 7  | 64  | 3.37037  | GnRH secretion                               | <a href="http://www.genome.jp/kegg-bin/show_pathway?hsa04929">http://www.genome.jp/kegg-bin/show_pathway?hsa04929</a> | PIK3CB AKT2 PIK3CA ESR2 AKT1 PRKCA PRKCB                                                                         |
| 0.00834<br>3 | 5  | 51  | 4.470899 | Ovarian steroidogenesis                      | <a href="http://www.genome.jp/kegg-bin/show_pathway?hsa04913">http://www.genome.jp/kegg-bin/show_pathway?hsa04913</a> | PTGS2 IGF1R CYP1A1 INSR ALOX5                                                                                    |
| 0.00904<br>8 | 9  | 81  | 2.770492 | B cell receptor signaling pathway            | <a href="http://www.genome.jp/kegg-bin/show_pathway?hsa04662">http://www.genome.jp/kegg-bin/show_pathway?hsa04662</a> | BTK PIK3CB GSK3B AKT2 PIK3CA AKT1 SYK PRKCB LYN                                                                  |
| 0.00994<br>6 | 6  | 61  | 3.634409 | Steroid hormone biosynthesis                 | <a href="http://www.genome.jp/kegg-bin/show_pathway?hsa00140">http://www.genome.jp/kegg-bin/show_pathway?hsa00140</a> | STS CYP3A5 HSD11B1 CYP1A1 CYP1A2 CYP3A4                                                                          |
| 0.00994<br>6 | 9  | 169 | 2.725806 | Protein processing in endoplasmic reticulum  | <a href="http://www.genome.jp/kegg-bin/show_pathway?hsa04141">http://www.genome.jp/kegg-bin/show_pathway?hsa04141</a> | CAPN1 MAPK9 HSP90AA1 HSP90AB1 MAPK8 MAPK10 CAPN2 ERN1 MAP3K5                                                     |
| 0.00994<br>6 | 6  | 69  | 3.634409 | Renin secretion                              | <a href="http://www.genome.jp/kegg-bin/show_pathway?hsa04924">http://www.genome.jp/kegg-bin/show_pathway?hsa04924</a> | REN AGTR1 KCNA1 ADORA1 PTGER4 PDE3A                                                                              |
| 0.01151<br>1 | 11 | 104 | 2.374202 | NF-kappa B signaling pathway                 | <a href="http://www.genome.jp/kegg-bin/show_pathway?hsa04064">http://www.genome.jp/kegg-bin/show_pathway?hsa04064</a> | BTK PRKCB TNFRSF1A PTGS2 CSNK2A1 TLR4 PARP1 SYK PRKCB LCK LYN                                                    |
| 0.01153<br>7 | 6  | 60  | 3.520833 | Long-term depression                         | <a href="http://www.genome.jp/kegg-bin/show_pathway?hsa04730">http://www.genome.jp/kegg-bin/show_pathway?hsa04730</a> | NOS1 IGF1R PRKCA BRAF PRKCB LYN                                                                                  |
| 0.01191<br>1 | 5  | 85  | 4.082126 | Taste transduction                           | <a href="http://www.genome.jp/kegg-bin/show_pathway?hsa04742">http://www.genome.jp/kegg-bin/show_pathway?hsa04742</a> | P2RX3 CHRM3 HTR3A SCN9A P2RY1                                                                                    |

|              |    |     |          |                                                           |                                                                                                                       |                                                                                         |
|--------------|----|-----|----------|-----------------------------------------------------------|-----------------------------------------------------------------------------------------------------------------------|-----------------------------------------------------------------------------------------|
| 0.01247<br>5 | 14 | 180 | 2.08642  | NOD-like receptor signaling pathway                       | <a href="http://www.genome.jp/kegg-bin/show_pathway?hsa04621">http://www.genome.jp/kegg-bin/show_pathway?hsa04621</a> | CASR MAPK9 HSP90AA1 P2RX7 HSP90AB1 RIPK2 TYK2 MAPK8 MAPK10 MAPK14 TLR4 CASP1 JAK1 PRKCD |
| 0.01413<br>7 | 9  | 169 | 2.560606 | Tight junction                                            | <a href="http://www.genome.jp/kegg-bin/show_pathway?hsa04530">http://www.genome.jp/kegg-bin/show_pathway?hsa04530</a> | CFTR MAPK9 PRKCZ MAPK8 MAPK10 CDK4 ERBB2 SRC MAP3K5                                     |
| 0.01413<br>7 | 9  | 114 | 2.560606 | Leukocyte transendothelial migration                      | <a href="http://www.genome.jp/kegg-bin/show_pathway?hsa04670">http://www.genome.jp/kegg-bin/show_pathway?hsa04670</a> | PIK3CB MMP2 MMP9 MAPK14 ITK PIK3CA PRKCA PRKCB PTK2                                     |
| 0.01413<br>7 | 9  | 232 | 2.560606 | Thermogenesis                                             | <a href="http://www.genome.jp/kegg-bin/show_pathway?hsa04714">http://www.genome.jp/kegg-bin/show_pathway?hsa04714</a> | MAP2K3 FGFR1 CPT1A MAPK14 CNR1 PPARG RPS6KA3 MAP3K5 MTOR                                |
| 0.01707<br>5 | 10 | 92  | 2.347222 | Th1 and Th2 cell differentiation                          | <a href="http://www.genome.jp/kegg-bin/show_pathway?hsa04658">http://www.genome.jp/kegg-bin/show_pathway?hsa04658</a> | MAPK9 PRKCQ JAK2 TYK2 JAK3 MAPK8 MAPK10 MAPK14 JAK1 LCK                                 |
| 0.01708<br>7 | 6  | 97  | 3.219048 | Circadian entrainment                                     | <a href="http://www.genome.jp/kegg-bin/show_pathway?hsa04713">http://www.genome.jp/kegg-bin/show_pathway?hsa04713</a> | NOS1 PER2 MTNR1B PRKCA PRKCB MTNR1A                                                     |
| 0.01708<br>7 | 6  | 92  | 3.219048 | Salivary secretion                                        | <a href="http://www.genome.jp/kegg-bin/show_pathway?hsa04970">http://www.genome.jp/kegg-bin/show_pathway?hsa04970</a> | NOS1 ADRA1A CHRM3 PRKCA KCNMA1 PRKCB                                                    |
| 0.01769<br>9 | 3  | 22  | 6.259259 | Arginine biosynthesis                                     | <a href="http://www.genome.jp/kegg-bin/show_pathway?hsa00220">http://www.genome.jp/kegg-bin/show_pathway?hsa00220</a> | NOS2 NOS1 NOS3                                                                          |
| 0.02181<br>8 | 9  | 92  | 2.380282 | Small cell lung cancer                                    | <a href="http://www.genome.jp/kegg-bin/show_pathway?hsa05222">http://www.genome.jp/kegg-bin/show_pathway?hsa05222</a> | NOS2 PIK3CB PTGS2 AKT2 PIK3CA CDK2 CDK4 AKT1 PTK2                                       |
| 0.02315<br>2 | 13 | 171 | 1.984643 | Influenza A                                               | <a href="http://www.genome.jp/kegg-bin/show_pathway?hsa05164">http://www.genome.jp/kegg-bin/show_pathway?hsa05164</a> | PIK3CB TNFRSF1A JAK2 AKT2 TYK2 PIK3CA CDK4 TLR4 CASP1 AKT1 PRKCA JAK1 PRKCB             |
| 0.02337<br>9 | 12 | 197 | 2.048485 | Pathogenic Escherichia coli infection                     | <a href="http://www.genome.jp/kegg-bin/show_pathway?hsa05130">http://www.genome.jp/kegg-bin/show_pathway?hsa05130</a> | FYN MAPK9 TNFRSF1A ABL1 MAPK8 MAPK10 MAPK14 TLR4 CASP1 PAK1 F2R SRC                     |
| 0.02757<br>1 | 13 | 217 | 1.93739  | Regulation of actin cytoskeleton                          | <a href="http://www.genome.jp/kegg-bin/show_pathway?hsa04810">http://www.genome.jp/kegg-bin/show_pathway?hsa04810</a> | PIK3CB FGFR1 PDGFRB PIK3CA CHRM3 PDGFRA EGFR PAK1 BRAF PTK2 CHRM2 F2R SRC               |
| 0.02962<br>3 | 5  | 76  | 3.237548 | Gastric acid secretion                                    | <a href="http://www.genome.jp/kegg-bin/show_pathway?hsa04971">http://www.genome.jp/kegg-bin/show_pathway?hsa04971</a> | CFTR CA2 CHRM3 PRKCA PRKCB                                                              |
| 0.03865<br>9 | 6  | 77  | 2.68254  | Bacterial invasion of epithelial cells                    | <a href="http://www.genome.jp/kegg-bin/show_pathway?hsa05100">http://www.genome.jp/kegg-bin/show_pathway?hsa05100</a> | PIK3CB MET PIK3CA ILK PTK2 SRC                                                          |
| 0.03899<br>2 | 8  | 166 | 2.276094 | Wnt signaling pathway                                     | <a href="http://www.genome.jp/kegg-bin/show_pathway?hsa04310">http://www.genome.jp/kegg-bin/show_pathway?hsa04310</a> | MAPK9 PSEN1 GSK3B CSNK2A1 MAPK8 MAPK10 PRKCA PRKCB                                      |
| 0.03981<br>9 | 10 | 252 | 2.041063 | Endocytosis                                               | <a href="http://www.genome.jp/kegg-bin/show_pathway?hsa04144">http://www.genome.jp/kegg-bin/show_pathway?hsa04144</a> | PRKCZ TGFBR1 PDGFRA MDM2 IGF1R EGFR CXCR1 TGFBR2 CXCR2 SRC                              |
| 0.05454<br>6 | 5  | 69  | 2.761438 | Amphetamine addiction                                     | <a href="http://www.genome.jp/kegg-bin/show_pathway?hsa05031">http://www.genome.jp/kegg-bin/show_pathway?hsa05031</a> | HDAC1 PRKCA PRKCB DRD1 HDAC2                                                            |
| 0.06036<br>4 | 5  | 89  | 2.68254  | Bile secretion                                            | <a href="http://www.genome.jp/kegg-bin/show_pathway?hsa04976">http://www.genome.jp/kegg-bin/show_pathway?hsa04976</a> | CFTR ABCB1 CA2 ABCG2 CYP3A4                                                             |
| 0.06036<br>4 | 8  | 187 | 2.08642  | Alcoholism                                                | <a href="http://www.genome.jp/kegg-bin/show_pathway?hsa05034">http://www.genome.jp/kegg-bin/show_pathway?hsa05034</a> | HDAC9 HDAC10 HDAC1 ADORA2A BRAF ADORA2B DRD1 HDAC2                                      |
| 0.06055<br>3 | 2  | 17  | 6.259259 | Nitrogen metabolism                                       | <a href="http://www.genome.jp/kegg-bin/show_pathway?hsa00910">http://www.genome.jp/kegg-bin/show_pathway?hsa00910</a> | CA2 CA1                                                                                 |
| 0.06055<br>3 | 12 | 363 | 1.774278 | Amyotrophic lateral sclerosis                             | <a href="http://www.genome.jp/kegg-bin/show_pathway?hsa05014">http://www.genome.jp/kegg-bin/show_pathway?hsa05014</a> | BAD NOS2 MAP2K3 TNFRSF1A NOS1 HDAC6 MAP2K6 MAPK14 CASP1 ERN1 MAP3K5 MTOR                |
| 0.06572<br>7 | 5  | 67  | 2.608025 | Long-term potentiation                                    | <a href="http://www.genome.jp/kegg-bin/show_pathway?hsa04720">http://www.genome.jp/kegg-bin/show_pathway?hsa04720</a> | PRKCA BRAF PRKCB GRM5 RPS6KA3                                                           |
| 0.06823<br>5 | 3  | 23  | 3.755556 | Renin-angiotensin system                                  | <a href="http://www.genome.jp/kegg-bin/show_pathway?hsa04614">http://www.genome.jp/kegg-bin/show_pathway?hsa04614</a> | PRCP REN AGTR1                                                                          |
| 0.07242<br>1 | 7  | 106 | 2.120072 | Parathyroid hormone synthesis, secretion and action       | <a href="http://www.genome.jp/kegg-bin/show_pathway?hsa04928">http://www.genome.jp/kegg-bin/show_pathway?hsa04928</a> | CASR FGFR1 MMP13 EGFR PRKCA BRAF PRKCB                                                  |
| 0.07373<br>8 | 10 | 306 | 1.823085 | Huntington disease                                        | <a href="http://www.genome.jp/kegg-bin/show_pathway?hsa05016">http://www.genome.jp/kegg-bin/show_pathway?hsa05016</a> | MAPK9 MAPK8 MAPK10 HDAC1 PPARG GRM5 ERN1 HDAC2 MAP3K5 MTOR                              |
| 0.07793      | 5  | 72  | 2.47076  | Mitophagy                                                 | <a href="http://www.genome.jp/kegg-bin/show_pathway?hsa04137">http://www.genome.jp/kegg-bin/show_pathway?hsa04137</a> | MAPK9 CSNK2A1 MAPK8 MAPK10 SRC                                                          |
| 0.08367<br>9 | 1  | 5   | 18.77778 | Caffeine metabolism                                       | <a href="http://www.genome.jp/kegg-bin/show_pathway?hsa00232">http://www.genome.jp/kegg-bin/show_pathway?hsa00232</a> | CYP1A2                                                                                  |
| 0.08367<br>9 | 11 | 272 | 1.721296 | Prion disease                                             | <a href="http://www.genome.jp/kegg-bin/show_pathway?hsa05020">http://www.genome.jp/kegg-bin/show_pathway?hsa05020</a> | BAD FYN MAPK9 PIK3CB GSK3B CSNK2A1 MAPK8 MAPK10 MAPK14 PIK3CA PRKCD                     |
| 0.09265<br>5 | 7  | 76  | 1.991582 | Pertussis                                                 | <a href="http://www.genome.jp/kegg-bin/show_pathway?hsa05133">http://www.genome.jp/kegg-bin/show_pathway?hsa05133</a> | NOS2 MAPK9 MAPK8 MAPK10 MAPK14 TLR4 CASP1                                               |
| 0.09265<br>5 | 7  | 102 | 1.991582 | Amoebiasis                                                | <a href="http://www.genome.jp/kegg-bin/show_pathway?hsa05146">http://www.genome.jp/kegg-bin/show_pathway?hsa05146</a> | NOS2 PIK3CB PIK3CA TLR4 PRKCA PRKCB PTK2                                                |
| 0.10492<br>8 | 9  | 130 | 1.760417 | Natural killer cell mediated cytotoxicity                 | <a href="http://www.genome.jp/kegg-bin/show_pathway?hsa04650">http://www.genome.jp/kegg-bin/show_pathway?hsa04650</a> | FYN PIK3CB PIK3CA PAK1 PRKCA BRAF SYK PRKCB LCK                                         |
| 0.11748<br>1 | 3  | 53  | 2.964912 | Endocrine and other factor-regulated calcium reabsorption | <a href="http://www.genome.jp/kegg-bin/show_pathway?hsa04961">http://www.genome.jp/kegg-bin/show_pathway?hsa04961</a> | ESR1 PRKCA PRKCB                                                                        |

|              |    |     |          |                                        |                                                                                                                       |                                                                  |
|--------------|----|-----|----------|----------------------------------------|-----------------------------------------------------------------------------------------------------------------------|------------------------------------------------------------------|
| 0.11748<br>1 | 7  | 76  | 1.877778 | Leishmaniasis                          | <a href="http://www.genome.jp/kegg-bin/show_pathway?hsa05140">http://www.genome.jp/kegg-bin/show_pathway?hsa05140</a> | NOS2 PTGS2 JAK2 MAPK14 TLR4 JAK1 PRKCB                           |
| 0.11954<br>6 | 2  | 33  | 4.17284  | Fructose and mannose metabolism        | <a href="http://www.genome.jp/kegg-bin/show_pathway?hsa00051">http://www.genome.jp/kegg-bin/show_pathway?hsa00051</a> | AKR1B1 PFKFB3                                                    |
| 0.11954<br>6 | 9  | 266 | 1.707071 | Parkinson disease                      | <a href="http://www.genome.jp/kegg-bin/show_pathway?hsa05012">http://www.genome.jp/kegg-bin/show_pathway?hsa05012</a> | MAPK9 MAPK8 MAPK10 ADORA2A ERN1 DRD1 LRRK2 MAP3K5 MAPT           |
| 0.11965<br>9 | 4  | 97  | 2.422939 | Phosphatidylinositol signaling system  | <a href="http://www.genome.jp/kegg-bin/show_pathway?hsa04070">http://www.genome.jp/kegg-bin/show_pathway?hsa04070</a> | PIK3CB PIK3CA PRKCA PRKCB                                        |
| 0.12831<br>2 | 6  | 150 | 1.942529 | Adrenergic signaling in cardiomyocytes | <a href="http://www.genome.jp/kegg-bin/show_pathway?hsa04261">http://www.genome.jp/kegg-bin/show_pathway?hsa04261</a> | AKT2 MAPK14 ADRA1A AKT1 AGTR1 PRKCA                              |
| 0.14478<br>2 | 3  | 67  | 2.68254  | Glycolysis / Gluconeogenesis           | <a href="http://www.genome.jp/kegg-bin/show_pathway?hsa00010">http://www.genome.jp/kegg-bin/show_pathway?hsa00010</a> | PKM GCK LDHB                                                     |
| 0.15298<br>8 | 6  | 154 | 1.846995 | Oxytocin signaling pathway             | <a href="http://www.genome.jp/kegg-bin/show_pathway?hsa04921">http://www.genome.jp/kegg-bin/show_pathway?hsa04921</a> | PTGS2 EGFR PRKCA NOS3 PRKCB SRC                                  |
| 0.16382<br>8 | 4  | 126 | 2.146032 | Purine metabolism                      | <a href="http://www.genome.jp/kegg-bin/show_pathway?hsa00230">http://www.genome.jp/kegg-bin/show_pathway?hsa00230</a> | PDE5A PDE3A PDE2A PDE7A                                          |
| 0.16382<br>8 | 2  | 49  | 3.414141 | Sphingolipid metabolism                | <a href="http://www.genome.jp/kegg-bin/show_pathway?hsa00600">http://www.genome.jp/kegg-bin/show_pathway?hsa00600</a> | SPHK2 SPHK1                                                      |
| 0.16382<br>8 | 12 | 495 | 1.472767 | Herpes simplex virus 1 infection       | <a href="http://www.genome.jp/kegg-bin/show_pathway?hsa05168">http://www.genome.jp/kegg-bin/show_pathway?hsa05168</a> | BAD PIK3CB TNFRSF1A JAK2 AKT2 TYK2 PIK3CA AKT1 JAK1 SYK SRC MTOR |
| 0.17372      | 3  | 89  | 2.449275 | GABAergic synapse                      | <a href="http://www.genome.jp/kegg-bin/show_pathway?hsa04727">http://www.genome.jp/kegg-bin/show_pathway?hsa04727</a> | PRKCA PRKCB SRC                                                  |
| 0.18787<br>6 | 2  | 47  | 3.12963  | Pyruvate metabolism                    | <a href="http://www.genome.jp/kegg-bin/show_pathway?hsa00620">http://www.genome.jp/kegg-bin/show_pathway?hsa00620</a> | PKM LDHB                                                         |
| 0.18906<br>5 | 3  | 51  | 2.347222 | Arginine and proline metabolism        | <a href="http://www.genome.jp/kegg-bin/show_pathway?hsa00330">http://www.genome.jp/kegg-bin/show_pathway?hsa00330</a> | NOS2 NOS1 NOS3                                                   |

**Table S8. Molecular docking results of cannabinoids based on their docking scores**

| Cannabinoids                               | PIK3CA<br>(PDB<br>ID:<br>4L23)<br>(Kcal/m<br>ol) | Akt1<br>(AlphaF<br>old-<br>predicte<br>d<br>protein)<br>(Kcal/m<br>ol) | MAPK<br>9<br>(Alpha<br>Fold-<br>predict<br>ed<br>protein<br>)<br>(Kcal/<br>mol) | PRKC<br>D<br>(Alpha<br>Fold-<br>predict<br>ed<br>protein<br>)<br>(Kcal/<br>mol) | BRAF<br>(PDB<br>ID:<br>6P3D)<br>(Kcal/m<br>ol) | IGF1R<br>(PDB<br>ID:<br>5FXS)<br>(Kcal/<br>mol) | NOS3<br>(PDB<br>ID:<br>6NH5)<br>(Kcal/<br>mol) |
|--------------------------------------------|--------------------------------------------------|------------------------------------------------------------------------|---------------------------------------------------------------------------------|---------------------------------------------------------------------------------|------------------------------------------------|-------------------------------------------------|------------------------------------------------|
| $\Delta^9$ -<br>tetrahydrocanna<br>binol   | -6.600                                           | -2.975                                                                 | -5.769                                                                          | <b>-5.123</b>                                                                   | -4.126                                         | <b>-8.569</b>                                   | -7.966                                         |
| Cannabinol                                 | -6.797                                           | -4.304                                                                 | -5.742                                                                          | -4.754                                                                          | -4.259                                         | -7.663                                          | <b>-8.888</b>                                  |
| Cannabidiol                                | -5.393                                           | -4.090                                                                 | -4.761                                                                          | -3.018                                                                          | -4.662                                         | -5.455                                          | -6.703                                         |
| $\Delta^8$ -<br>tetrahydrocanna<br>binol   | -5.616                                           | -3.034                                                                 | <b>-6.751</b>                                                                   | -3.274                                                                          | -5.464                                         | -4.788                                          | -6.380                                         |
| Cannabigerol                               | <b>-8.307</b>                                    | -0.183                                                                 | -4.407                                                                          | -4.636                                                                          | <b>-9.484</b>                                  | <b>-8.190</b>                                   | <b>-8.080</b>                                  |
| Cannabichrome<br>ne                        | <b>-7.314</b>                                    | <b>-4.599</b>                                                          | <b>-7.663</b>                                                                   | -4.399                                                                          | <b>-7.522</b>                                  | -7.230                                          | <b>-8.152</b>                                  |
| $\Delta^9$ -<br>tetrahydrocanna<br>bivarin | <b>-7.334</b>                                    | -3.396                                                                 | -5.550                                                                          | <b>-5.121</b>                                                                   | -4.205                                         | <b>-8.402</b>                                   | -7.744                                         |
| Cannabivarin                               | -4.819                                           | -4.353                                                                 | -5.486                                                                          | -3.939                                                                          | -4.455                                         | -8.029                                          | -8.015                                         |
| Cannabidivarin                             | -5.412                                           | -3.540                                                                 | -4.802                                                                          | -2.344                                                                          | -3.706                                         | -5.832                                          | -5.544                                         |



|               |        |               |               |               |               |        |        |
|---------------|--------|---------------|---------------|---------------|---------------|--------|--------|
| Cannadinodiol | -5.927 | -4.175        | <b>-7.664</b> | -3.310        | <b>-8.076</b> | -7.700 | -8.068 |
| Cannabielsoin | -4.945 | <b>-4.466</b> | -6.453        | -2.998        | -4.916        | -7.160 | -7.534 |
| Cannabicyclol | -5.741 | -4.011        | -6.167        | -3.156        | -5.040        | -6.793 | -7.546 |
| Cannabitriol  | -6.423 | <b>-6.035</b> | -4.605        | <b>-7.308</b> | -4.899        | -7.639 | -7.943 |

**Table S9. Molecular docking results of cannabinoids based on their interactions**

| <b>Protein name</b>   | <b>Compound Name</b>               | <b>H-bond forming residues</b> | <b>Hydrophobic interaction forming residues</b>                                                   | <b>Polar interaction forming residues</b>            |
|-----------------------|------------------------------------|--------------------------------|---------------------------------------------------------------------------------------------------|------------------------------------------------------|
| PIK3CA (PDB ID: 7JIU) | Cannabigerol                       | Val 851                        | Met 772, Pro 778, Trp 780, Ile 800, Tyr 836, Ile 848, Val 850, Val 851, Met 922, Phe 930, Ile 932 | Ser 774, Asn 853, Ser 854, Hie 855, Phr 856, Gln 859 |
|                       | $\Delta^9$ -Tetrahydrocannabivarin | -                              | Leu 807, Leu 814, Val Tyr 836, Cys 838, Ile 848, 850, Val 851, Met 922, Phe 930, Ile 932, Phe 934 | Ser 854, Phr 856, Gln 859                            |
|                       | Cannabichromene                    | Tyr 836                        | Met 772, Pro 778, Trp 780, Ile 800, Tyr 836, Ile 848, Val 851, val 850, Met 922, Phe 930, Ile 932 | Ser 774, Ser 854, Thr 856, Ser 919                   |
| Akt1                  | Cannabitriol                       | Lys 276, Asn 279, Asp 292      | Val 164, Ala177, Leu 156, Met 227, Ala 230, Tyr 229, Met 281, Phe 438, Phe 442                    | Thr 211, Asn 279                                     |

|       |                                  |                           |                                                                                                                |                                            |
|-------|----------------------------------|---------------------------|----------------------------------------------------------------------------------------------------------------|--------------------------------------------|
|       | Cannabichromene                  | Asn 279                   | Leu 156, Phe 161, Val 164, Ala 177, Leu 181, Met 227, Tyr 229, Ala 230, Met 281, Phe 438                       | Thr 160, Thr 211, Asn 279, Phr 291         |
|       | Cannabielsoin                    | Lys 158, Glu 278          | Leu 156, Val 164, Ala 177, Met 227, Tyr 229, Ala 230, Met 281, Phe 442, Phe 438                                | Asn 231, Asn 279, Thr 291                  |
| MAPK9 | Cannabinodiol                    | Ile 32, Ser 155           | Ile 32, Ile 39, Val 40, Ala 53, Ile 86, Met 109, Leu 110, Met 111, Ala 113, Val 158, Leu 168                   | Ser 34, Asn 114, Gln 117, Ser 155, Asn 156 |
|       | Cannabichromene                  | Glu 109, Met 111          | Ile 32, Val 40, Ala 53, Ile 86, Leu 77, Leu 106, Met 108, Leu 110, Met 111, Ala 113, Val 158, Leu 168, Phe 170 | Ser 34, Asn 114, Ser 155                   |
|       | $\Delta^8$ -Tetrahydrocannabinol | Lys 55                    | Ile 32, Ala 36, Ile 39, Val 40, Ala 53, Ile 86, Met 108, Leu 110, Met 111, Val 158, Leu 168                    | Ser 34, Gln 37, Asn 114, Ser 155, Asn 156  |
| PRKCD | Cannabitriol                     | Val 174, Leu 279, Gln 284 | Val 174, Cys 175, Cys 264, Met 266, Leu 279, Cys 280, Ile 282, Leu 286                                         | Ser 173, Hie 231, Asn 283, Gln 284         |
|       | $\Delta^9$ -tetrahydrocannabinol | Val 174, Gln 284          | Val 174, Cys 175, Cys 264, Met 266, Leu 279,                                                                   | Ser 173, Hie 231, Asn 283, Gln 284         |

|       |                                  |                  |                                                                                                                                                |                                                               |
|-------|----------------------------------|------------------|------------------------------------------------------------------------------------------------------------------------------------------------|---------------------------------------------------------------|
|       |                                  |                  | Cys 280, Ile 282, Leu 286,                                                                                                                     |                                                               |
|       | $\Delta^9$ -Tetrahydrocannabinol | Val 174, Gln 284 | Val 174, Cys 175, Cys 264, Met 266, Leu 279, Cys 280, ile 282, Leu 286                                                                         | Ser 173, Hie 231, Asn 283, Gln 284                            |
| BRAF  | Cannabigerol                     | Cys 532          | Ile 463, Val 471, Ala 481, Val 482, Leu 514, Trp 531, Cys 532, Phe 583, Phe 595, Leu 597, Ala 598                                              | Thr 529, Gln 530, Ser 535, Ser 536, His 539, Asn 580, Thr 599 |
|       | Cannabinodiol                    | Cys 532          | Ile 463, Val 471, Ala 481, Val 482, Leu 514, Trp 531, Cys 532, Phe 583, Phe 595, Leu 597                                                       | Thr 529, Gln 530, Ser 536, Asn 580                            |
|       | Cannabichromene                  | -                | Ile 463, Val 471, Ala 481, Val 482, Leu 505, Ile 513, Leu 514, Ile 527, Val 528, Trp 531, Cys 532, Leu 567, Phe 583, Ile 592, Phe 595, Leu 597 | Thr 508, Thr 529, Gln 530, Hie 574                            |
| IGF1R | $\Delta^9$ -tetrahydrocannabinol | Met 1082         | Leu 1005, Phe 1010, val 1013, Ala 1031, Met 1142, Met 1156, Ile 1160, Leu 1081, Met 1082                                                       | Gln 1007, Ser 1009, Thr 1083                                  |

|      |                                            |                     |                                                                                                                                                                          |                              |
|------|--------------------------------------------|---------------------|--------------------------------------------------------------------------------------------------------------------------------------------------------------------------|------------------------------|
|      | $\Delta^9$ -<br>Tetrahydrocannabi<br>varin | Met 1082            | Leu 1005, Phe 1010,<br>Val 1013, Ala 1031,<br>Val 1063, Met 1079,<br>Leu 1081, Met 1082,<br>Met 1142, Met 1156, Ile<br>1160                                              | Thr 1083, Thr<br>1157        |
|      | Cannabigerol                               | Met 1082            | Leu 1005, Phe 1010,<br>Val 1013, Ala 1031,<br>Met 1079, Leu 1081,<br>Met 1082, Met 1142,<br>Met 1156, Ile 1160                                                           | Gln 1007, Thr<br>1083        |
| NOS3 | Cannabinol                                 | -                   | Al 174, Ala 177, Trp<br>178, Ala 181, Pro 182,<br>Cys 184, Leu 193, Ala<br>227, Ile 228, Pro 334,<br>Val 336, Met 339, Phe<br>353, Trp 356, Trp 447,<br>Phe 473, Tyr 475 | Ser 226, ser 254             |
|      | Cannabichromene                            | Ser 354             | Ala 177, Trp 178, Ala<br>181, Cys 184, Leu 193,<br>Ala 227, Pro 334, Val<br>336, , Met 339, Phe<br>353, Trp 356, Tyr 357,<br>Met 358, Phe 473                            | Gln 189, Ser 226,<br>Ser 354 |
|      | Cannabigerol                               | Cys 184, Pro<br>334 | Ala 174, Trp 178, Ala<br>181, Cys 184, Leu 193,<br>Ala 227, Ile 228, Pro                                                                                                 | Ser 226, Ser 354             |

|  |  |  |                                                                 |  |
|--|--|--|-----------------------------------------------------------------|--|
|  |  |  | 334, Ala 335, Val 336,<br>Met 339, Phe 353, Trp<br>447, Phe 473 |  |
|--|--|--|-----------------------------------------------------------------|--|

**Table S10. Results of Induced Fit docking**

| Protein | Cannabinoids                         | Glidescore)<br>(Kcal/mol) | IFDScore  |
|---------|--------------------------------------|---------------------------|-----------|
| PIK3CA  | Cannabigerol                         | -7.702                    | -2125.814 |
| Akt1    | Cannabitriol                         | -7.109                    | -1019.941 |
| MAPK9   | Cannabinodiol                        | -8.825                    | -865.667  |
| PRKCD   | Cannabitriol                         | -7.728                    | -1400.602 |
| BRAF    | Cannabigerol                         | -9.950                    | -595.181  |
| IGF1R   | $\Delta^9$ -<br>tetrahydrocannabinol | -10.544                   | -451.272  |
| NOS3    | Cannabinol                           | -10.054                   | -842.164  |

**Table S11. Binding free energies results of cannabinoids the based on MM-GBSA calculations**

| Protein | Cannabinoids                       | MM-GBSA $\Delta G_{\text{bind}}$ |
|---------|------------------------------------|----------------------------------|
| PIK3CA  | Cannabigerol                       | -2.445                           |
|         | $\Delta^9$ -Tetrahydrocannabivarin | -9.269                           |
|         | Cannabichromene                    | -37.318                          |
| Akt1    | Cannabitriol                       | -33.851                          |
|         | Cannabichromene                    | -24.115                          |
|         | Cannabielsoin                      | -33.147                          |
| MAPK9   | Cannabinodiol                      | -51.893                          |
|         | Cannabichromene                    | -38.202                          |
|         | $\Delta^8$ -Tetrahydrocannabinol   | -38.375                          |

|       |                                    |         |
|-------|------------------------------------|---------|
| PRKCD | Cannabitriol                       | -44.818 |
|       | $\Delta^9$ -tetrahydrocannabinol   | -43.322 |
|       | $\Delta^9$ -Tetrahydrocannabivarin | -43.582 |
| BRAF  | Cannabigerol                       | -49.429 |
|       | Cannabinodiol                      | -25.703 |
|       | Cannabichromene                    | -38.882 |
| IGF1R | $\Delta^9$ -tetrahydrocannabinol   | -36.616 |
|       | $\Delta^9$ -Tetrahydrocannabivarin | -42.273 |
|       | Cannabigerol                       | -35.050 |
| NOS3  | Cannabinol                         | -57.754 |
|       | Cannabichromene                    | -44.761 |
|       | Cannabigerol                       | -54.273 |

**Table S12. Physico-chemical properties and ADME/T profile of cannabinoids**

|                           |                        |                  |                  |                  |                  |                            |                                 |                  |                            |                                       |                                           |                                           |                                      |                                 |                                 |                                 |                                 |                                           |                                                                                                                                |             |        |                                                                         |                                                                              |                                                                         |                                                                         |                                                                         |
|---------------------------|------------------------|------------------|------------------|------------------|------------------|----------------------------|---------------------------------|------------------|----------------------------|---------------------------------------|-------------------------------------------|-------------------------------------------|--------------------------------------|---------------------------------|---------------------------------|---------------------------------|---------------------------------|-------------------------------------------|--------------------------------------------------------------------------------------------------------------------------------|-------------|--------|-------------------------------------------------------------------------|------------------------------------------------------------------------------|-------------------------------------------------------------------------|-------------------------------------------------------------------------|-------------------------------------------------------------------------|
| Phy<br>toco<br>mpo<br>und | m<br>ol<br>_<br>M<br>W | S<br>A<br>S<br>A | F<br>O<br>S<br>A | F<br>I<br>S<br>A | P<br>I<br>S<br>A | v<br>o<br>l<br>u<br>m<br>e | d<br>o<br>n<br>o<br>r<br>H<br>B | g<br>l<br>o<br>b | Q<br>P<br>o<br>l<br>r<br>z | Q<br>P<br>l<br>o<br>g<br>P<br>C<br>16 | Q<br>P<br>l<br>o<br>g<br>P<br>o<br>c<br>t | Q<br>P<br>l<br>o<br>g<br>P<br>o<br>/<br>w | C<br>I<br>Q<br>P<br>l<br>o<br>g<br>S | Q<br>P<br>P<br>C<br>a<br>c<br>o | Q<br>P<br>l<br>o<br>g<br>B<br>B | Q<br>P<br>P<br>M<br>D<br>C<br>K | Q<br>P<br>l<br>o<br>g<br>K<br>p | Q<br>P<br>l<br>o<br>g<br>K<br>h<br>s<br>a | P<br>e<br>r<br>c<br>e<br>n<br>t<br>H<br>u<br>m<br>a<br>n<br>O<br>r<br>a<br>l<br>A<br>b<br>s<br>o<br>r<br>p<br>t<br>i<br>o<br>n | P<br>S<br>A | J<br>m | C<br>Y<br>P<br>1<br>A<br>2<br>i<br>n<br>h<br>i<br>b<br>i<br>t<br>o<br>r | C<br>Y<br>P<br>2<br>C<br>1<br>9<br>i<br>n<br>h<br>i<br>b<br>i<br>t<br>o<br>r | C<br>Y<br>P<br>2<br>C<br>9<br>i<br>n<br>h<br>i<br>b<br>i<br>t<br>o<br>r | C<br>Y<br>P<br>2<br>D<br>6<br>i<br>n<br>h<br>i<br>b<br>i<br>t<br>o<br>r | C<br>Y<br>P<br>3<br>A<br>4<br>i<br>n<br>h<br>i<br>b<br>i<br>t<br>o<br>r |
|---------------------------|------------------------|------------------|------------------|------------------|------------------|----------------------------|---------------------------------|------------------|----------------------------|---------------------------------------|-------------------------------------------|-------------------------------------------|--------------------------------------|---------------------------------|---------------------------------|---------------------------------|---------------------------------|-------------------------------------------|--------------------------------------------------------------------------------------------------------------------------------|-------------|--------|-------------------------------------------------------------------------|------------------------------------------------------------------------------|-------------------------------------------------------------------------|-------------------------------------------------------------------------|-------------------------------------------------------------------------|

|                        |         |         |         |         |          |          |   |          |        |        |        |       |        |          |        |          |         |       |     |        |       |     |     |     |     |     |
|------------------------|---------|---------|---------|---------|----------|----------|---|----------|--------|--------|--------|-------|--------|----------|--------|----------|---------|-------|-----|--------|-------|-----|-----|-----|-----|-----|
| Can nabi diol          | 314.467 | 649.509 | 495.853 | 64.232  | 88.923   | 115.9843 | 2 | 0.822585 | 36.617 | 10.522 | 14.971 | 5.336 | -5.269 | 243.6615 | -0.491 | 1295.451 | -1.718  | 1.059 | 100 | 39.005 | 0.005 | No  | Yes | Yes | Yes | Yes |
| Δ-Tetrahydrocannabinol | 314.467 | 640.761 | 513.941 | 30.372  | 86.448   | 11.795   | 1 | 0.832681 | 36.756 | 9.778  | 13.516 | 5.645 | -5.482 | 510.3682 | -0.033 | 2880.636 | -1.2295 | 1.208 | 100 | 25.657 | 0.006 | No  | Yes | Yes | Yes | No  |
| Can nabi gerol         | 316.483 | 682.022 | 541.523 | 72.26   | 74.423   | 12.25024 | 2 | 0.804537 | 36.519 | 11.109 | 14.693 | 5.681 | -5.211 | 204.5034 | -0.844 | 1071.965 | -1.533  | 1.07  | 100 | 41.961 | 0.006 | Yes | Yes | No  | Yes | No  |
| Can nabi chro mone     | 314.467 | 672.24  | 515.24  | 46.799  | 115.5679 | 12.237   | 1 | 0.806874 | 37.933 | 10.774 | 13.856 | 6.019 | -5.501 | 356.9289 | -0.337 | 1957.156 | -1.2205 | 1.279 | 100 | 28.131 | 0.003 | No  | No  | Yes | Yes | Yes |
| Δ-Tetrahydrocannabinol | 286.413 | 585.928 | 462.88  | 37.8092 | 85.242   | 10.863   | 1 | 0.842288 | 33.989 | 8.875  | 12.727 | 4.942 | -4.897 | 433.866  | 0.027  | 2416.877 | -1.628  | 1.008 | 100 | 26.006 | 0.008 | No  | Yes | Yes | Yes | No  |
| Can nabi vari n        | 282.382 | 576.07  | 384.12  | 38.8115 | 140.715  | 10.059   | 1 | 0.839426 | 33.41  | 9.033  | 12.552 | 4.869 | -5.073 | 420.7455 | 0.019  | 2378.851 | -1.417  | 0.924 | 100 | 26.446 | 0.02  | Yes | Yes | No  | Yes | No  |
| Can nabi diva rin      | 286.413 | 569.122 | 410.05  | 64.194  | 94.88    | 10.0722  | 2 | 0.866818 | 37.73  | 9.422  | 14.043 | 4.518 | -4.689 | 243.8625 | -0.307 | 1296.606 | -1.888  | 0.787 | 100 | 39.048 | 0.04  | No  | Yes | Yes | No  | Yes |
| Can nabi nodi ol       | 310.435 | 646.4   | 412.0   | 68.146  | 166.2    | 11.426   | 2 | 0.81776  | 36.026 | 10.931 | 14.796 | 5.288 | -5.444 | 223.703  | -0.598 | 1181.147 | -1.422  | 0.967 | 100 | 41.108 | 0.015 | Yes | Yes | No  | Yes | No  |
